# Supplementary material for: Single-nucleus transcriptomic mapping uncovers targets for traumatic brain injury
Source: HighWire-hosted journal article supplement (doi:10.1101/gr.277881.123), 2023-09-20
Supplement: Supplemental_Figures.pdf [file Supplemental_Figures.pdf]

**A**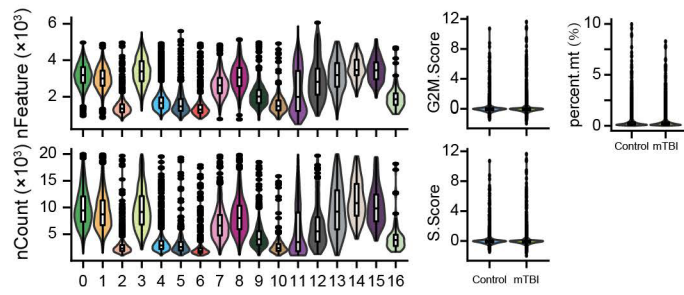**B**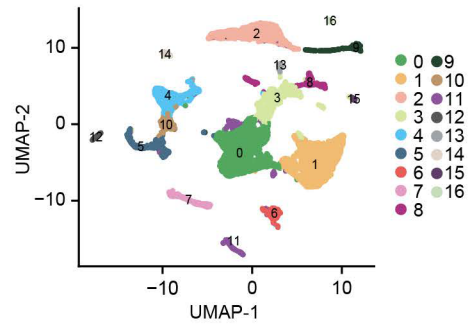**C**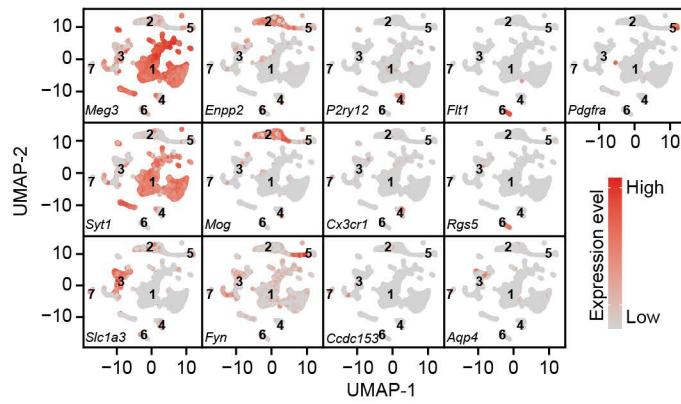**D**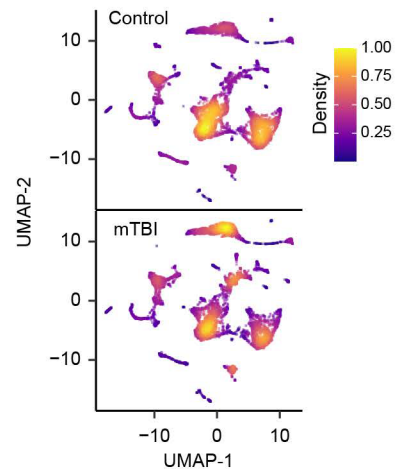

**Supplemental\_Fig\_S1. Quality control of the snRNA-seq. Related to Figure 1.**

**A.** Left: total gene and UMI counts for individual cells grouped by cell cluster in the control and the mTBI SVZ. Right: the proportion of G2M phase, S phase cell and mitochondrial RNA in the control and the mTBI SVZ.

**B.** UMAP plot of 16 clusters in the SVZ niche. Cells are coloured according to their cell clusters.

**C.** Distribution of known markers in the UMAP: *Meg3*, *Syt1* (Neuron); *Enpp2*, *Mog* (Oligodendrocyte); *Slc1a3* (Endothelial); *Cx3cr1*, *P2ry12* (OPC); *Fyn*, *Pdgfra* (Microglia); *Rgs5*, *Fit1* (Astrocyte & NSC); *Ccdc153*, *Aqp4* (Ependymal).

**D.** UMAP plot of single cells in the control and mTBI group. A gradient of purple to yellow indicates low to high density in the plot.

**A**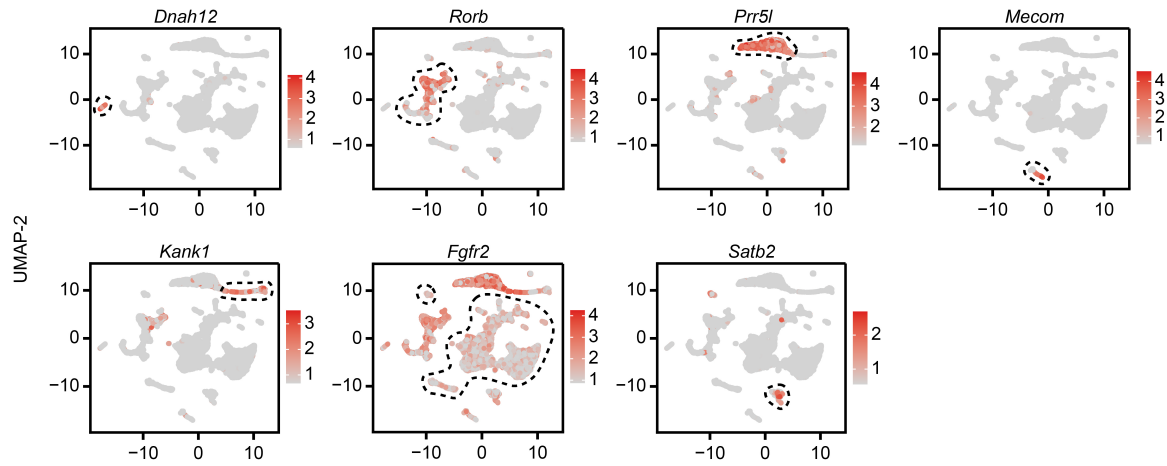**B**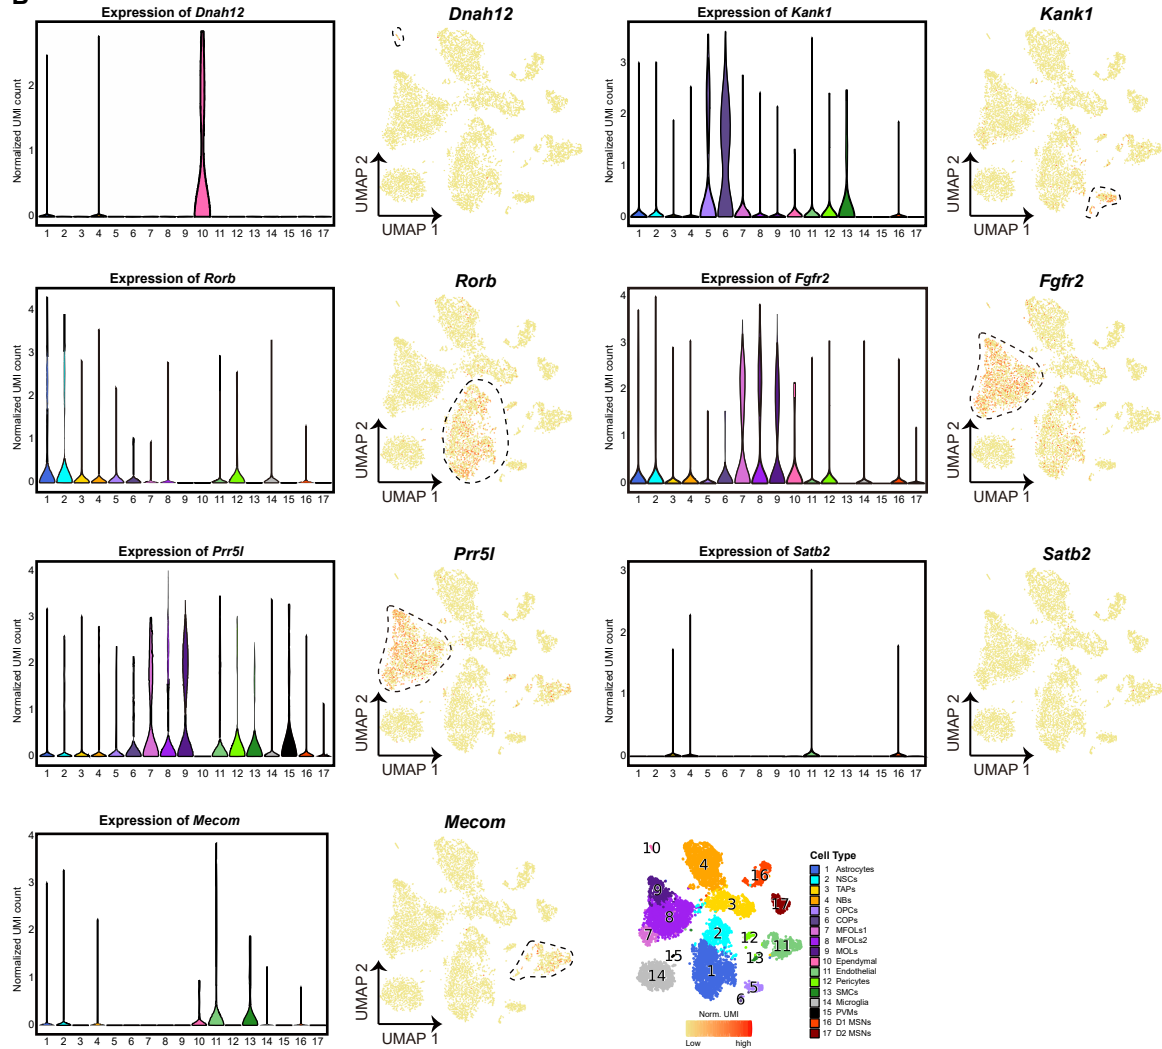**C**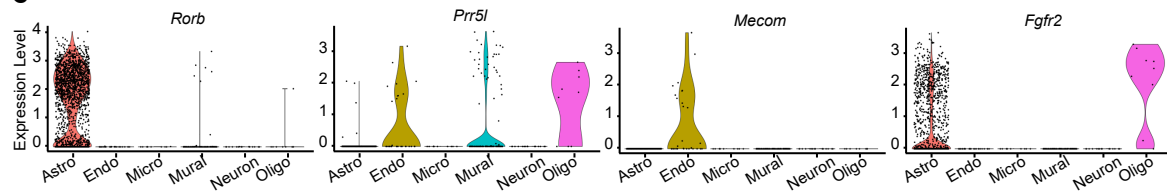

**Supplemental\_Fig\_S2. Novel markers of each cell type. Related to Figure 1.**

- A.** Distribution of novel markers on the UMAP in each cell type.
- B.** Expression profiles of novel cell type-specific markers in other SVZ single-cell dataset. Violin plots depict the expression levels of novel cell type-specific markers in each cell population, while UMAP visualizes the relative expression of each novel cell type-specific marker.
- C.** Expression profiles of novel cell type-specific markers in the other cortex and hippocampus single-cell dataset. Violin plots depict the expression levels of novel cell type-specific markers in each cell population.



**A**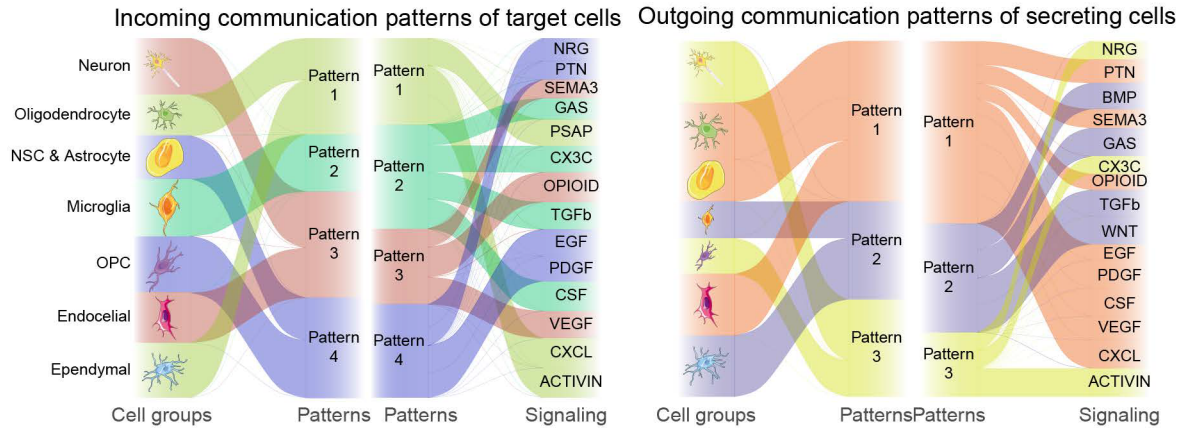**B**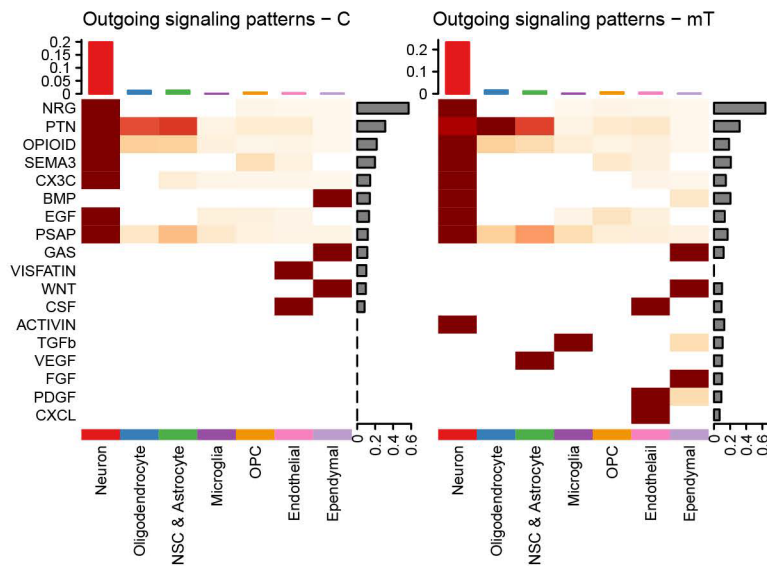**C**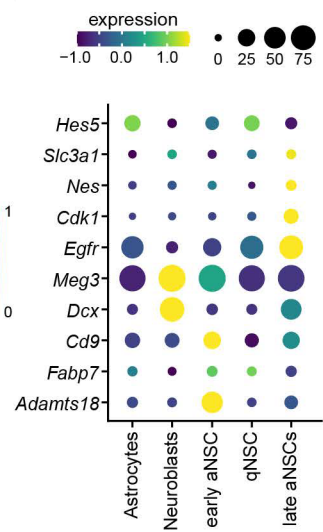

**Supplemental\_Fig\_S3. Transcriptional heterogeneity of certain cell types in response to the mTBI. Related to Figure 2.**

- A.** Dot plot showing the specific gene expression in cluster 13.
- B.** GO analysis exhibiting enriched terms in cluster 15.
- C.** Volcano plot displaying highly variable genes in each cell type.

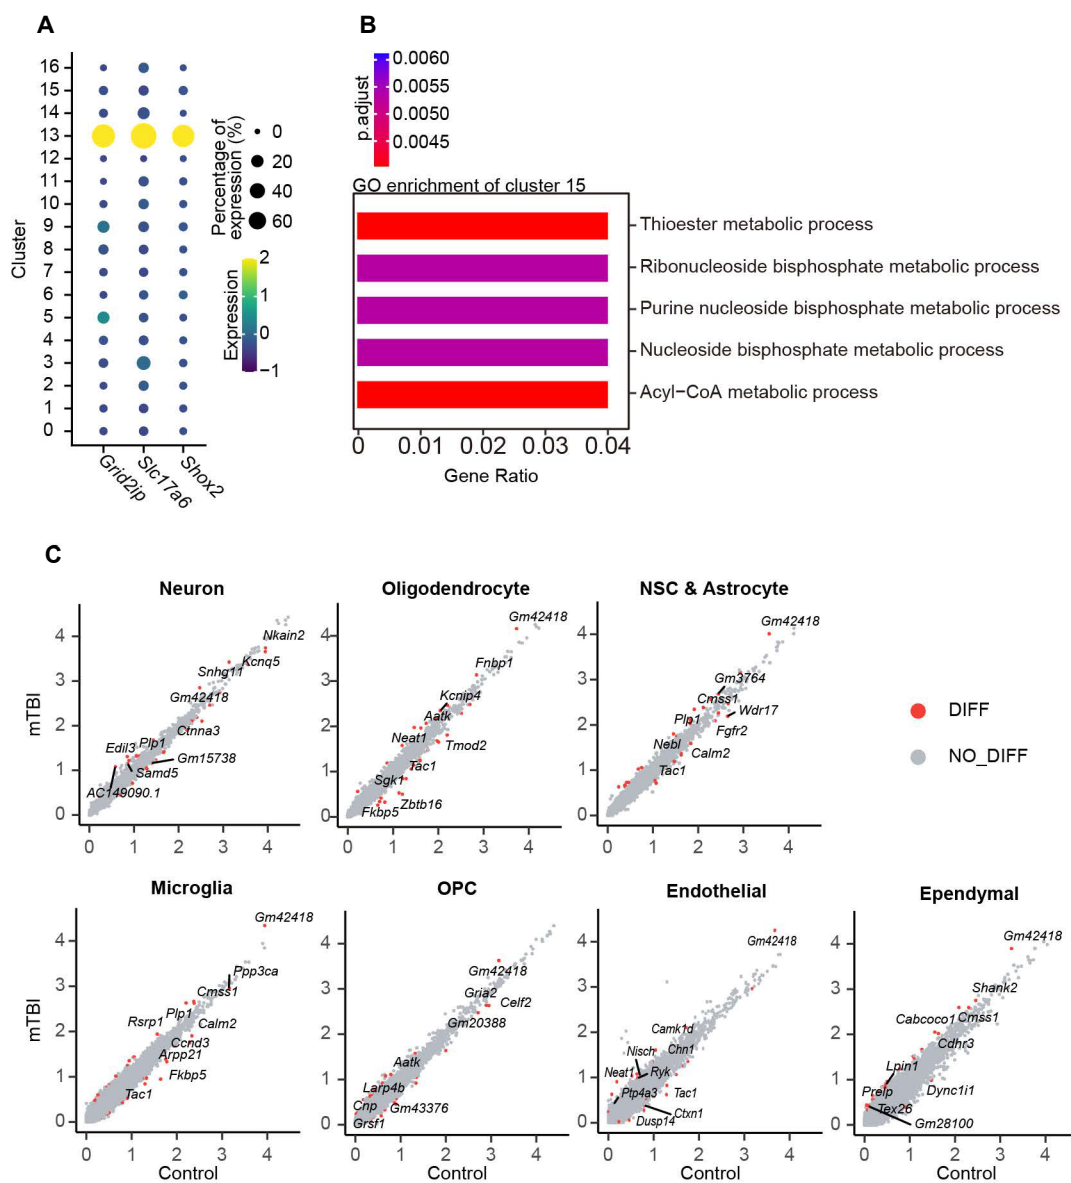

**Supplemental\_Fig\_S4. Additional information for the cell-cell interactions changed in the SVZ after mTBI, and markers for each NSC & astrocyte subtype. Related to Figure 3 & 6.**

**A.** Incoming and outgoing communication patterns of target cells in each cell type.

**B.** Heatmap of the CellChat signaling in each cell type. Left panel: the outgoing signaling patterns in the control (expression weight value of signaling molecules), right panel: the outgoing signaling patterns in the mTBI (expression weight value of signaling receptors). A gradient of white to crimson indicates low to high expression weight value in the heatmap.

**C.** Dot plot of the representative markers for each NSC & astrocyte subtype.

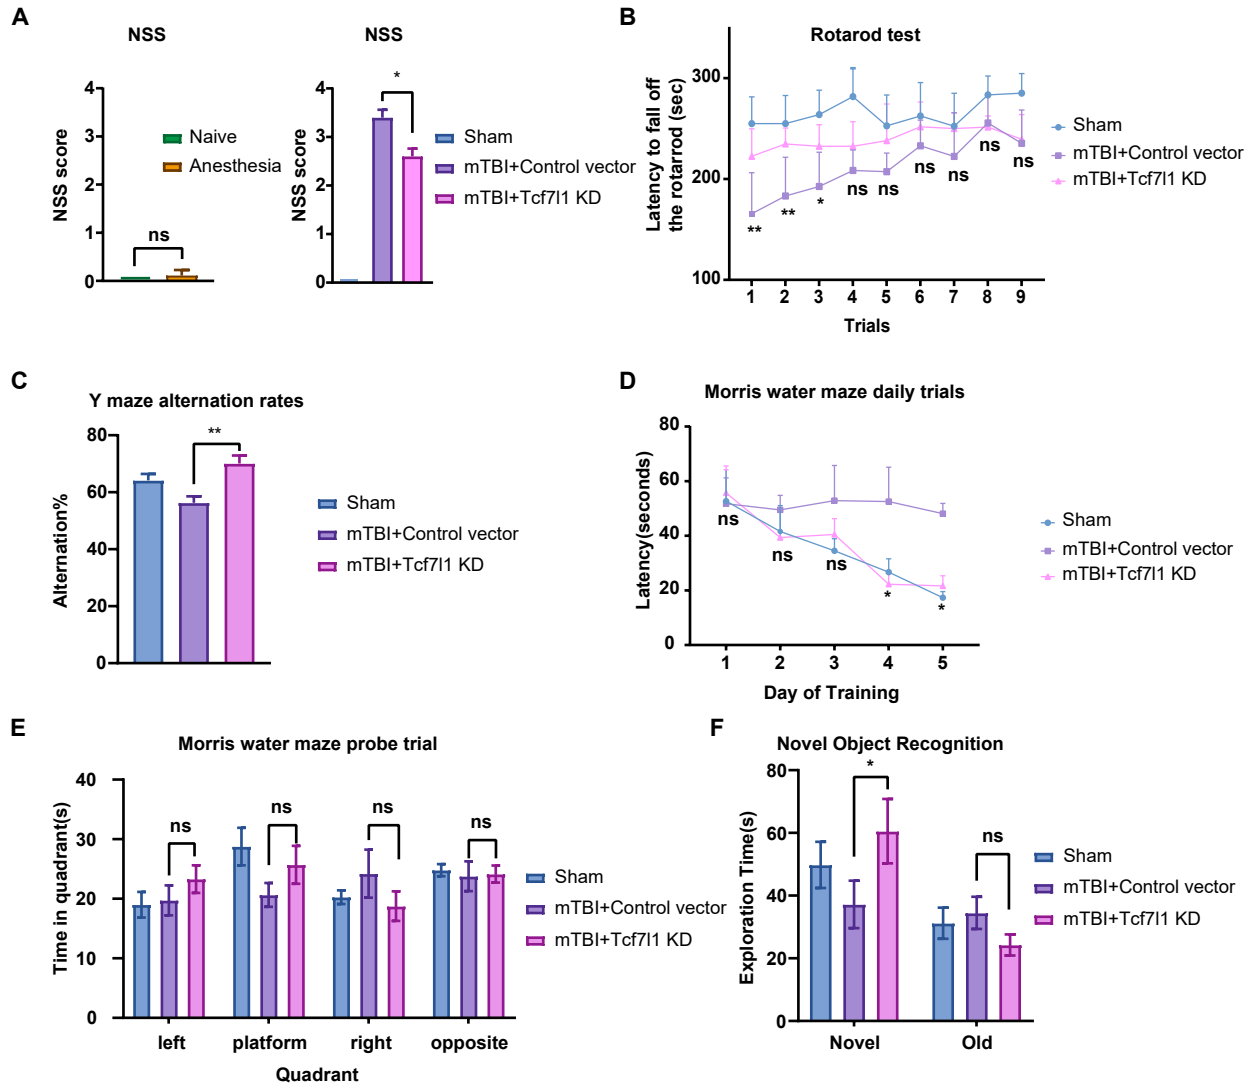

**Supplemental\_Fig\_S5. The impact of Tcf7l1-KD on NSS score and long-term behavioral outcomes in mice.**

**A.** Left: NSS score of naive and anesthesia-only mice. Right: NSS score of mTBI+Tcf7l1-KD, mTBI+Control vector and Sham mice. NSS assessment was conducted on mice 1 hour after injury.

**B.** Rotarod test. The latency time of each mouse falling off the rod was recorded. The speed ranged from 4rpm to 40rpm, with a total duration of 300 seconds. Each mouse was tested 3 times/day, with a minimum interval of 10 minutes between tests, for a total of 9 tests over 3 days.

**C.** Y-maze test. Alternation rate = (Number of alternations / Total number of arm entries - 2)  $\times$  100%.

**D.** Morris water maze (MWM) daily trials for spatial localization and navigation. Animals need to find a hidden platform in a circular pool in the 1st stage (1-5 days), and the time from entering the water to finding the platform is recorded as latency.

**E.** MWM probe trial. The time spent by mice moving in different quadrants was recorded.

**F.** Novel object recognition test. The time each mouse spends exploring the novel and old objects was recorded.

Statistical significance was determined by Student's *t*-test or two-way ANOVA(\**p* < 0.05, \*\**p* < 0.01).
