# Supplementary material for: Single-nucleus transcriptomic mapping uncovers targets for traumatic brain injury
Source: HighWire-hosted journal article supplement (doi:10.1101/gr.277881.123), 2023-09-20
Supplement: Supplemental_Table_S2.docx [file Supplemental_Table_S2.docx]

| **Supplemental Table S2. Differentially expressed genes generated comparing each cell type of SVZ, related to Figure 1.** | | | | | | | |
| --- | --- | --- | --- | --- | --- | --- | --- |
|  | gene | p_val | avg_log2FC | pct.1 | pct.2 | p_val_adj | cluster |
| Rbfox1 | Rbfox1 | 0 | 2.856806841 | 0.996 | 0.756 | 0 | Neuron |
| Dlgap2 | Dlgap2 | 0 | 2.663430893 | 0.968 | 0.237 | 0 | Neuron |
| Phactr1 | Phactr1 | 0 | 2.617915859 | 0.994 | 0.88 | 0 | Neuron |
| Kcnq5 | Kcnq5 | 0 | 2.582283459 | 0.971 | 0.656 | 0 | Neuron |
| Cntn5 | Cntn5 | 0 | 2.579401068 | 0.969 | 0.527 | 0 | Neuron |
| Galntl6 | Galntl6 | 0 | 2.570696176 | 0.943 | 0.398 | 0 | Neuron |
| Cacna2d3 | Cacna2d3 | 0 | 2.567407584 | 0.95 | 0.477 | 0 | Neuron |
| Kcnip4 | Kcnip4 | 0 | 2.544345248 | 0.997 | 0.835 | 0 | Neuron |
| Slit3 | Slit3 | 0 | 2.540344851 | 0.867 | 0.169 | 0 | Neuron |
| Cntnap2 | Cntnap2 | 0 | 2.502564187 | 0.997 | 0.755 | 0 | Neuron |
| Gabrg3 | Gabrg3 | 0 | 2.452135529 | 0.974 | 0.439 | 0 | Neuron |
| Rarb | Rarb | 0 | 2.397820393 | 0.868 | 0.298 | 0 | Neuron |
| Ryr3 | Ryr3 | 0 | 2.385752829 | 0.95 | 0.335 | 0 | Neuron |
| Meg3 | Meg3 | 0 | 2.36535812 | 1 | 0.893 | 0 | Neuron |
| Hs6st3 | Hs6st3 | 0 | 2.361336173 | 0.882 | 0.319 | 0 | Neuron |
| Erc2 | Erc2 | 0 | 2.347334417 | 0.997 | 0.414 | 0 | Neuron |
| Grm5 | Grm5 | 0 | 2.344039764 | 0.997 | 0.717 | 0 | Neuron |
| Syt1 | Syt1 | 0 | 2.342526014 | 0.996 | 0.662 | 0 | Neuron |
| Nrg1 | Nrg1 | 0 | 2.333515169 | 0.977 | 0.716 | 0 | Neuron |
| Sgcz | Sgcz | 0 | 2.326645821 | 0.97 | 0.671 | 0 | Neuron |
| Caln1 | Caln1 | 0 | 2.30284746 | 0.936 | 0.288 | 0 | Neuron |
| Lingo2 | Lingo2 | 0 | 2.297215701 | 0.785 | 0.498 | 0 | Neuron |
| Frmpd4 | Frmpd4 | 0 | 2.288020159 | 0.96 | 0.296 | 0 | Neuron |
| Tenm2 | Tenm2 | 0 | 2.286104954 | 0.988 | 0.654 | 0 | Neuron |
| Kctd16 | Kctd16 | 0 | 2.274186401 | 0.955 | 0.317 | 0 | Neuron |
| Celf2 | Celf2 | 0 | 2.223743682 | 0.999 | 0.921 | 0 | Neuron |
| Pde10a | Pde10a | 0 | 2.216139254 | 0.984 | 0.62 | 0 | Neuron |
| Nrg3 | Nrg3 | 0 | 2.208884213 | 0.917 | 0.52 | 0 | Neuron |
| Grin2a | Grin2a | 0 | 2.182651125 | 0.934 | 0.191 | 0 | Neuron |
| Lrrtm4 | Lrrtm4 | 0 | 2.176971103 | 0.987 | 0.617 | 0 | Neuron |
| Asic2 | Asic2 | 0 | 2.163180776 | 0.949 | 0.396 | 0 | Neuron |
| Cntnap5a | Cntnap5a | 0 | 2.157864678 | 0.886 | 0.214 | 0 | Neuron |
| Fgf14 | Fgf14 | 0 | 2.124411073 | 1 | 0.828 | 0 | Neuron |
| Hs3st4 | Hs3st4 | 0 | 2.101635904 | 0.811 | 0.153 | 0 | Neuron |
| Gria1 | Gria1 | 0 | 2.090701094 | 0.984 | 0.381 | 0 | Neuron |
| Cacna1e | Cacna1e | 0 | 2.087943033 | 0.956 | 0.278 | 0 | Neuron |
| Dpp6 | Dpp6 | 0 | 2.071318672 | 0.996 | 0.343 | 0 | Neuron |
| Gm10754 | Gm10754 | 0 | 2.064173569 | 0.794 | 0.2 | 0 | Neuron |
| Cacnb2 | Cacnb2 | 0 | 2.029851366 | 0.989 | 0.452 | 0 | Neuron |
| Samd12 | Samd12 | 0 | 2.009600569 | 0.987 | 0.282 | 0 | Neuron |
| Dlg2 | Dlg2 | 0 | 2.007882925 | 1 | 0.904 | 0 | Neuron |
| Snhg11 | Snhg11 | 0 | 2.004470114 | 0.997 | 0.713 | 0 | Neuron |
| Lrfn5 | Lrfn5 | 0 | 2.00083384 | 0.971 | 0.365 | 0 | Neuron |
| Kcnd2 | Kcnd2 | 0 | 1.994681565 | 0.999 | 0.804 | 0 | Neuron |
| Gpr158 | Gpr158 | 0 | 1.988757175 | 0.976 | 0.352 | 0 | Neuron |
| Epha6 | Epha6 | 0 | 1.988270802 | 0.959 | 0.348 | 0 | Neuron |
| Grin2b | Grin2b | 0 | 1.983575602 | 0.997 | 0.454 | 0 | Neuron |
| Zfp385b | Zfp385b | 0 | 1.981534407 | 0.924 | 0.261 | 0 | Neuron |
| Galnt13 | Galnt13 | 0 | 1.940459444 | 0.979 | 0.392 | 0 | Neuron |
| Lrrc7 | Lrrc7 | 0 | 1.934604386 | 0.997 | 0.563 | 0 | Neuron |
| Grm7 | Grm7 | 0 | 1.925647822 | 0.982 | 0.625 | 0 | Neuron |
| Ptprn2 | Ptprn2 | 0 | 1.916820054 | 0.996 | 0.347 | 0 | Neuron |
| Etl4 | Etl4 | 0 | 1.903193377 | 0.778 | 0.151 | 0 | Neuron |
| Gm28905 | Gm28905 | 0 | 1.90098419 | 0.809 | 0.128 | 0 | Neuron |
| Myt1l | Myt1l | 0 | 1.884843254 | 0.994 | 0.401 | 0 | Neuron |
| Pde7b | Pde7b | 0 | 1.879411539 | 0.888 | 0.378 | 0 | Neuron |
| Klhl29 | Klhl29 | 0 | 1.870147645 | 0.948 | 0.178 | 0 | Neuron |
| Mctp1 | Mctp1 | 0 | 1.862467839 | 0.939 | 0.348 | 0 | Neuron |
| Cntn4 | Cntn4 | 0 | 1.832204328 | 0.893 | 0.357 | 0 | Neuron |
| Dab1 | Dab1 | 0 | 1.826797171 | 0.963 | 0.449 | 0 | Neuron |
| Gm32647 | Gm32647 | 0 | 1.82616376 | 0.612 | 0.127 | 0 | Neuron |
| Cdh18 | Cdh18 | 0 | 1.824760916 | 0.763 | 0.222 | 0 | Neuron |
| Cdh8 | Cdh8 | 0 | 1.813155121 | 0.911 | 0.288 | 0 | Neuron |
| Tenm4 | Tenm4 | 0 | 1.810470245 | 0.973 | 0.334 | 0 | Neuron |
| Kcnab1 | Kcnab1 | 0 | 1.807745972 | 0.937 | 0.45 | 0 | Neuron |
| Csmd1 | Csmd1 | 0 | 1.806433018 | 0.997 | 0.726 | 0 | Neuron |
| Pcsk2 | Pcsk2 | 0 | 1.787476131 | 0.915 | 0.314 | 0 | Neuron |
| Rbfox3 | Rbfox3 | 0 | 1.78153782 | 0.934 | 0.15 | 0 | Neuron |
| Egfem1 | Egfem1 | 0 | 1.74419374 | 0.793 | 0.284 | 0 | Neuron |
| Kctd8 | Kctd8 | 0 | 1.73634222 | 0.789 | 0.253 | 0 | Neuron |
| A230006K03Rik | A230006K03Rik | 0 | 1.732530044 | 0.907 | 0.178 | 0 | Neuron |
| Slc2a13 | Slc2a13 | 0 | 1.731529798 | 0.946 | 0.24 | 0 | Neuron |
| 6530403H02Rik | 6530403H02Rik | 0 | 1.721341276 | 0.649 | 0.119 | 0 | Neuron |
| Fstl4 | Fstl4 | 0 | 1.715763408 | 0.772 | 0.109 | 0 | Neuron |
| Dcc | Dcc | 0 | 1.695440527 | 0.97 | 0.672 | 0 | Neuron |
| Grm1 | Grm1 | 0 | 1.689658208 | 0.85 | 0.208 | 0 | Neuron |
| Cntnap5b | Cntnap5b | 0 | 1.689234064 | 0.78 | 0.134 | 0 | Neuron |
| Camk4 | Camk4 | 0 | 1.675784133 | 0.914 | 0.361 | 0 | Neuron |
| Gabrb3 | Gabrb3 | 0 | 1.668730167 | 0.994 | 0.454 | 0 | Neuron |
| Ksr2.1 | Ksr2.1 | 0 | 1.647706042 | 0.919 | 0.128 | 0 | Neuron |
| Ntrk3 | Ntrk3 | 0 | 1.640209656 | 0.966 | 0.344 | 0 | Neuron |
| Usp29 | Usp29 | 0 | 1.633990169 | 0.864 | 0.176 | 0 | Neuron |
| Rgs9 | Rgs9 | 0 | 1.630586102 | 0.831 | 0.233 | 0 | Neuron |
| Plcb1 | Plcb1 | 0 | 1.629264738 | 0.988 | 0.653 | 0 | Neuron |
| Zfp804a | Zfp804a | 0 | 1.626002926 | 0.821 | 0.221 | 0 | Neuron |
| Neto1 | Neto1 | 0 | 1.613261888 | 0.895 | 0.248 | 0 | Neuron |
| Gria3 | Gria3 | 0 | 1.612736245 | 0.941 | 0.33 | 0 | Neuron |
| Grin1 | Grin1 | 0 | 1.609852191 | 0.959 | 0.226 | 0 | Neuron |
| Mgat4c | Mgat4c | 0 | 1.608884884 | 0.917 | 0.413 | 0 | Neuron |
| Rims1 | Rims1 | 0 | 1.60351754 | 0.986 | 0.343 | 0 | Neuron |
| Nkain3 | Nkain3 | 0 | 1.593292828 | 0.831 | 0.209 | 0 | Neuron |
| Kalrn | Kalrn | 0 | 1.59206272 | 0.991 | 0.453 | 0 | Neuron |
| Shisa9 | Shisa9 | 0 | 1.583277497 | 0.898 | 0.293 | 0 | Neuron |
| Htr2c | Htr2c | 0 | 1.582734089 | 0.778 | 0.197 | 0 | Neuron |
| Camk2a | Camk2a | 0 | 1.581368301 | 0.917 | 0.155 | 0 | Neuron |
| Tenm1 | Tenm1 | 0 | 1.575146392 | 0.842 | 0.226 | 0 | Neuron |
| Rasgef1b | Rasgef1b | 0 | 1.57454156 | 0.863 | 0.194 | 0 | Neuron |
| Stxbp5l | Stxbp5l | 0 | 1.568957061 | 0.961 | 0.271 | 0 | Neuron |
| Unc5d | Unc5d | 0 | 1.564154144 | 0.555 | 0.179 | 0 | Neuron |
| Me3 | Me3 | 0 | 1.561867933 | 0.891 | 0.179 | 0 | Neuron |
| Pdzd2 | Pdzd2 | 0 | 1.558615797 | 0.817 | 0.213 | 0 | Neuron |
| Unc13c | Unc13c | 0 | 1.558074073 | 0.84 | 0.251 | 0 | Neuron |
| Macrod2 | Macrod2 | 0 | 1.550402598 | 0.998 | 0.727 | 0 | Neuron |
| Pde1a | Pde1a | 0 | 1.546601814 | 0.496 | 0.163 | 0 | Neuron |
| Ksr2 | Ksr2 | 0 | 1.543419784 | 0.938 | 0.377 | 0 | Neuron |
| Chsy3 | Chsy3 | 0 | 1.538088147 | 0.891 | 0.281 | 0 | Neuron |
| 5730522E02Rik | 5730522E02Rik | 0 | 1.523644519 | 0.926 | 0.271 | 0 | Neuron |
| Arhgap10 | Arhgap10 | 0 | 1.521711558 | 0.749 | 0.128 | 0 | Neuron |
| Rbms3 | Rbms3 | 0 | 1.512515331 | 0.926 | 0.285 | 0 | Neuron |
| 9530059O14Rik | 9530059O14Rik | 0 | 1.50077215 | 0.891 | 0.201 | 0 | Neuron |
| Dpp10 | Dpp10 | 0 | 1.5001206 | 0.906 | 0.305 | 0 | Neuron |
| Prkg1 | Prkg1 | 0 | 1.491089351 | 0.774 | 0.317 | 0 | Neuron |
| Kcnma1 | Kcnma1 | 0 | 1.489935055 | 0.992 | 0.458 | 0 | Neuron |
| A830018L16Rik | A830018L16Rik | 0 | 1.484544331 | 0.782 | 0.136 | 0 | Neuron |
| Fras1 | Fras1 | 0 | 1.479924352 | 0.793 | 0.125 | 0 | Neuron |
| Dgkb | Dgkb | 0 | 1.478641554 | 0.989 | 0.744 | 0 | Neuron |
| Clvs1 | Clvs1 | 0 | 1.476320923 | 0.873 | 0.152 | 0 | Neuron |
| Gm15155 | Gm15155 | 0 | 1.467640422 | 0.678 | 0.099 | 0 | Neuron |
| Dok6 | Dok6 | 0 | 1.462817253 | 0.949 | 0.274 | 0 | Neuron |
| Gm26691 | Gm26691 | 0 | 1.462306377 | 0.839 | 0.17 | 0 | Neuron |
| Ryr2 | Ryr2 | 0 | 1.459793173 | 0.832 | 0.156 | 0 | Neuron |
| Sntg1 | Sntg1 | 0 | 1.45935988 | 0.989 | 0.352 | 0 | Neuron |
| Rnf150 | Rnf150 | 0 | 1.453349444 | 0.896 | 0.22 | 0 | Neuron |
| Cacna1a | Cacna1a | 0 | 1.439962096 | 0.967 | 0.302 | 0 | Neuron |
| Adgrb3 | Adgrb3 | 0 | 1.439076097 | 0.998 | 0.809 | 0 | Neuron |
| Sptbn4 | Sptbn4 | 0 | 1.436667662 | 0.83 | 0.084 | 0 | Neuron |
| Unc79 | Unc79 | 0 | 1.426639002 | 0.972 | 0.326 | 0 | Neuron |
| Brinp1 | Brinp1 | 0 | 1.423589246 | 0.922 | 0.272 | 0 | Neuron |
| Adamts3 | Adamts3 | 0 | 1.421980711 | 0.788 | 0.139 | 0 | Neuron |
| Gabra2 | Gabra2 | 0 | 1.416751306 | 0.946 | 0.308 | 0 | Neuron |
| Rapgef4 | Rapgef4 | 0 | 1.413245385 | 0.912 | 0.192 | 0 | Neuron |
| Lrrtm3 | Lrrtm3 | 0 | 1.411894738 | 0.955 | 0.409 | 0 | Neuron |
| Hs3st5 | Hs3st5 | 0 | 1.400108755 | 0.737 | 0.121 | 0 | Neuron |
| Gm26905 | Gm26905 | 0 | 1.398225513 | 0.561 | 0.047 | 0 | Neuron |
| Grip1 | Grip1 | 0 | 1.381219423 | 0.936 | 0.371 | 0 | Neuron |
| Syndig1 | Syndig1 | 0 | 1.378993787 | 0.752 | 0.103 | 0 | Neuron |
| Spock3 | Spock3 | 0 | 1.376892183 | 0.974 | 0.634 | 0 | Neuron |
| Plppr1 | Plppr1 | 0 | 1.371249971 | 0.883 | 0.233 | 0 | Neuron |
| Gnal | Gnal | 0 | 1.370404153 | 0.934 | 0.365 | 0 | Neuron |
| Olfm3 | Olfm3 | 0 | 1.366190932 | 0.668 | 0.142 | 0 | Neuron |
| Fam135b | Fam135b | 0 | 1.364925894 | 0.793 | 0.111 | 0 | Neuron |
| Rit2 | Rit2 | 0 | 1.359038438 | 0.915 | 0.212 | 0 | Neuron |
| Ano3 | Ano3 | 0 | 1.356705455 | 0.839 | 0.293 | 0 | Neuron |
| Khdrbs2 | Khdrbs2 | 0 | 1.356120773 | 0.763 | 0.193 | 0 | Neuron |
| Nrg2 | Nrg2 | 0 | 1.35603155 | 0.883 | 0.176 | 0 | Neuron |
| Foxp1 | Foxp1 | 0 | 1.345602065 | 0.927 | 0.585 | 0 | Neuron |
| Rgs7bp | Rgs7bp | 0 | 1.336873383 | 0.941 | 0.35 | 0 | Neuron |
| Nyap2 | Nyap2 | 0 | 1.335612926 | 0.823 | 0.148 | 0 | Neuron |
| Anks1b | Anks1b | 0 | 1.331504732 | 1 | 0.782 | 0 | Neuron |
| Mtus2 | Mtus2 | 0 | 1.330030681 | 0.792 | 0.097 | 0 | Neuron |
| Itpr1 | Itpr1 | 0 | 1.329297427 | 0.877 | 0.341 | 0 | Neuron |
| Gm1043 | Gm1043 | 0 | 1.328304779 | 0.766 | 0.076 | 0 | Neuron |
| Col25a1 | Col25a1 | 0 | 1.319007442 | 0.581 | 0.108 | 0 | Neuron |
| Celf4 | Celf4 | 0 | 1.318255033 | 0.977 | 0.323 | 0 | Neuron |
| Dtnb | Dtnb | 0 | 1.309439813 | 0.952 | 0.337 | 0 | Neuron |
| Rims2 | Rims2 | 0 | 1.303730286 | 0.995 | 0.582 | 0 | Neuron |
| Sorbs2 | Sorbs2 | 0 | 1.303640175 | 0.971 | 0.365 | 0 | Neuron |
| Trank1 | Trank1 | 0 | 1.30094753 | 0.857 | 0.142 | 0 | Neuron |
| Grid1 | Grid1 | 0 | 1.294578957 | 0.97 | 0.394 | 0 | Neuron |
| Gabrb2 | Gabrb2 | 0 | 1.294442199 | 0.868 | 0.206 | 0 | Neuron |
| Mei4 | Mei4 | 0 | 1.29394254 | 0.606 | 0.087 | 0 | Neuron |
| Cpne5 | Cpne5 | 0 | 1.292472131 | 0.757 | 0.111 | 0 | Neuron |
| Nlgn1 | Nlgn1 | 0 | 1.291042917 | 0.989 | 0.893 | 0 | Neuron |
| Cacna1c | Cacna1c | 0 | 1.28930178 | 0.989 | 0.369 | 0 | Neuron |
| Cacnb4 | Cacnb4 | 0 | 1.285159755 | 0.973 | 0.459 | 0 | Neuron |
| Fam189a1 | Fam189a1 | 0 | 1.278743581 | 0.758 | 0.111 | 0 | Neuron |
| Ahi1 | Ahi1 | 0 | 1.27778383 | 0.982 | 0.456 | 0 | Neuron |
| Chrm3 | Chrm3 | 0 | 1.276757175 | 0.363 | 0.067 | 0 | Neuron |
| Atxn1 | Atxn1 | 0 | 1.272951494 | 0.989 | 0.532 | 0 | Neuron |
| Gm2164 | Gm2164 | 0 | 1.272444063 | 0.655 | 0.115 | 0 | Neuron |
| Npas2 | Npas2 | 0 | 1.27067971 | 0.804 | 0.192 | 0 | Neuron |
| Hecw1 | Hecw1 | 0 | 1.269807955 | 0.836 | 0.148 | 0 | Neuron |
| Negr1 | Negr1 | 0 | 1.25924295 | 0.997 | 0.769 | 0 | Neuron |
| Lmo7 | Lmo7 | 0 | 1.258703239 | 0.782 | 0.165 | 0 | Neuron |
| Ptchd4 | Ptchd4 | 0 | 1.252432172 | 0.658 | 0.115 | 0 | Neuron |
| 5330417C22Rik | 5330417C22Rik | 0 | 1.249842351 | 0.786 | 0.097 | 0 | Neuron |
| Kcnh1 | Kcnh1 | 0 | 1.249212272 | 0.735 | 0.104 | 0 | Neuron |
| Ripor2 | Ripor2 | 0 | 1.24533668 | 0.841 | 0.151 | 0 | Neuron |
| Sipa1l1 | Sipa1l1 | 0 | 1.24394976 | 0.949 | 0.34 | 0 | Neuron |
| Kcnb2 | Kcnb2 | 0 | 1.243436748 | 0.844 | 0.217 | 0 | Neuron |
| Foxp2 | Foxp2 | 0 | 1.241450763 | 0.777 | 0.334 | 0 | Neuron |
| Unc80 | Unc80 | 0 | 1.234378584 | 0.93 | 0.253 | 0 | Neuron |
| Dach1 | Dach1 | 0 | 1.23357871 | 0.8 | 0.341 | 0 | Neuron |
| Rasgrf1 | Rasgrf1 | 0 | 1.229357776 | 0.857 | 0.213 | 0 | Neuron |
| Reln | Reln | 0 | 1.225242376 | 0.596 | 0.117 | 0 | Neuron |
| Hs6st2 | Hs6st2 | 0 | 1.215834303 | 0.789 | 0.173 | 0 | Neuron |
| Gm26848 | Gm26848 | 0 | 1.215324484 | 0.967 | 0.385 | 0 | Neuron |
| Jakmip1 | Jakmip1 | 0 | 1.212748249 | 0.832 | 0.147 | 0 | Neuron |
| Nell1 | Nell1 | 0 | 1.209533759 | 0.426 | 0.087 | 0 | Neuron |
| Galnt17 | Galnt17 | 0 | 1.203478043 | 0.651 | 0.133 | 0 | Neuron |
| Fat3 | Fat3 | 0 | 1.198383488 | 0.956 | 0.411 | 0 | Neuron |
| Prkce | Prkce | 0 | 1.195866416 | 0.969 | 0.389 | 0 | Neuron |
| Ccser1 | Ccser1 | 0 | 1.195171916 | 0.997 | 0.553 | 0 | Neuron |
| 2010300C02Rik | 2010300C02Rik | 0 | 1.193962088 | 0.786 | 0.16 | 0 | Neuron |
| Arpp21 | Arpp21 | 0 | 1.184872632 | 0.945 | 0.502 | 0 | Neuron |
| Sh3rf3 | Sh3rf3 | 0 | 1.184558688 | 0.762 | 0.121 | 0 | Neuron |
| Scn1a | Scn1a | 0 | 1.179965928 | 0.879 | 0.2 | 0 | Neuron |
| Slc35f3 | Slc35f3 | 0 | 1.17912621 | 0.72 | 0.08 | 0 | Neuron |
| Ube3a | Ube3a | 0 | 1.178795335 | 0.983 | 0.493 | 0 | Neuron |
| Gng7 | Gng7 | 0 | 1.175444395 | 0.819 | 0.259 | 0 | Neuron |
| Xkr6 | Xkr6 | 0 | 1.175022224 | 0.932 | 0.29 | 0 | Neuron |
| Srrm3 | Srrm3 | 0 | 1.172397077 | 0.799 | 0.114 | 0 | Neuron |
| Osbpl8 | Osbpl8 | 0 | 1.17230068 | 0.931 | 0.426 | 0 | Neuron |
| Lrtm1 | Lrtm1 | 0 | 1.164913225 | 0.629 | 0.047 | 0 | Neuron |
| Actn2 | Actn2 | 0 | 1.161463895 | 0.641 | 0.074 | 0 | Neuron |
| Dgkh | Dgkh | 0 | 1.160676416 | 0.866 | 0.226 | 0 | Neuron |
| Opcml | Opcml | 0 | 1.152869115 | 0.969 | 0.547 | 0 | Neuron |
| Ica1 | Ica1 | 0 | 1.151108613 | 0.833 | 0.136 | 0 | Neuron |
| Robo1 | Robo1 | 0 | 1.149981962 | 0.951 | 0.408 | 0 | Neuron |
| Pdzrn4 | Pdzrn4 | 0 | 1.146974474 | 0.548 | 0.153 | 0 | Neuron |
| Xkr4 | Xkr4 | 0 | 1.144711826 | 0.99 | 0.516 | 0 | Neuron |
| Cntnap5c | Cntnap5c | 0 | 1.14126173 | 0.523 | 0.08 | 0 | Neuron |
| Cacng3 | Cacng3 | 0 | 1.140713907 | 0.713 | 0.1 | 0 | Neuron |
| Thsd7a | Thsd7a | 0 | 1.138438754 | 0.839 | 0.41 | 0 | Neuron |
| Cdh12 | Cdh12 | 0 | 1.136633694 | 0.575 | 0.112 | 0 | Neuron |
| Zfyve28 | Zfyve28 | 0 | 1.134933955 | 0.747 | 0.117 | 0 | Neuron |
| Csrnp3 | Csrnp3 | 0 | 1.130348812 | 0.947 | 0.305 | 0 | Neuron |
| Htr1f | Htr1f | 0 | 1.126910682 | 0.616 | 0.126 | 0 | Neuron |
| Esrrg | Esrrg | 0 | 1.125116776 | 0.839 | 0.193 | 0 | Neuron |
| Hcn1 | Hcn1 | 0 | 1.120881062 | 0.569 | 0.142 | 0 | Neuron |
| D430041D05Rik | D430041D05Rik | 0 | 1.11636526 | 0.861 | 0.215 | 0 | Neuron |
| Tmtc1 | Tmtc1 | 0 | 1.115655303 | 0.765 | 0.176 | 0 | Neuron |
| Cacna1b | Cacna1b | 0 | 1.11359511 | 0.829 | 0.147 | 0 | Neuron |
| Gprin3 | Gprin3 | 0 | 1.111421907 | 0.69 | 0.134 | 0 | Neuron |
| Rimbp2 | Rimbp2 | 0 | 1.109916298 | 0.711 | 0.085 | 0 | Neuron |
| Mirg | Mirg | 0 | 1.102009447 | 0.711 | 0.073 | 0 | Neuron |
| Grik2 | Grik2 | 0 | 1.101781147 | 0.996 | 0.875 | 0 | Neuron |
| Fam155a | Fam155a | 0 | 1.10130192 | 0.684 | 0.339 | 0 | Neuron |
| Cdh9 | Cdh9 | 0 | 1.100493727 | 0.629 | 0.096 | 0 | Neuron |
| Dgki | Dgki | 0 | 1.096480494 | 0.978 | 0.57 | 0 | Neuron |
| Nrg3os | Nrg3os | 0 | 1.091443674 | 0.535 | 0.053 | 0 | Neuron |
| Hivep2 | Hivep2 | 0 | 1.090729075 | 0.975 | 0.446 | 0 | Neuron |
| Alcam | Alcam | 0 | 1.090725832 | 0.936 | 0.601 | 0 | Neuron |
| Slc35f4 | Slc35f4 | 0 | 1.09044483 | 0.528 | 0.084 | 0 | Neuron |
| Necab1 | Necab1 | 0 | 1.086115708 | 0.496 | 0.094 | 0 | Neuron |
| Gm15810 | Gm15810 | 0 | 1.075754939 | 0.593 | 0.046 | 0 | Neuron |
| Pclo | Pclo | 0 | 1.073550643 | 0.976 | 0.453 | 0 | Neuron |
| Syt16 | Syt16 | 0 | 1.067400071 | 0.774 | 0.147 | 0 | Neuron |
| Clstn2 | Clstn2 | 0 | 1.064294383 | 0.459 | 0.091 | 0 | Neuron |
| Dync1i1 | Dync1i1 | 0 | 1.063904534 | 0.829 | 0.179 | 0 | Neuron |
| Zmat4 | Zmat4 | 0 | 1.062978097 | 0.48 | 0.069 | 0 | Neuron |
| St6galnac5 | St6galnac5 | 0 | 1.062584843 | 0.817 | 0.21 | 0 | Neuron |
| Plekha5 | Plekha5 | 0 | 1.061991974 | 0.976 | 0.512 | 0 | Neuron |
| Sv2c | Sv2c | 0 | 1.057915278 | 0.687 | 0.127 | 0 | Neuron |
| Ttll11 | Ttll11 | 0 | 1.056154478 | 0.753 | 0.119 | 0 | Neuron |
| Gria4 | Gria4 | 0 | 1.053393168 | 0.962 | 0.492 | 0 | Neuron |
| Lin7a | Lin7a | 0 | 1.045657482 | 0.675 | 0.116 | 0 | Neuron |
| Pacsin1 | Pacsin1 | 0 | 1.043209595 | 0.809 | 0.142 | 0 | Neuron |
| Dlgap3 | Dlgap3 | 0 | 1.0427531 | 0.708 | 0.099 | 0 | Neuron |
| Nebl | Nebl | 0 | 1.039150628 | 0.957 | 0.359 | 0 | Neuron |
| Cdh13 | Cdh13 | 0 | 1.032912282 | 0.671 | 0.198 | 0 | Neuron |
| Atrnl1 | Atrnl1 | 0 | 1.031780612 | 0.885 | 0.258 | 0 | Neuron |
| Adgrl3 | Adgrl3 | 0 | 1.03160942 | 0.998 | 0.738 | 0 | Neuron |
| Osbp2 | Osbp2 | 0 | 1.029990143 | 0.727 | 0.146 | 0 | Neuron |
| Gm30382 | Gm30382 | 0 | 1.02990642 | 0.516 | 0.046 | 0 | Neuron |
| Lrrc4c | Lrrc4c | 0 | 1.029604888 | 0.989 | 0.86 | 0 | Neuron |
| Rgs17 | Rgs17 | 0 | 1.028519021 | 0.768 | 0.157 | 0 | Neuron |
| Slc35f1 | Slc35f1 | 0 | 1.026548886 | 0.924 | 0.358 | 0 | Neuron |
| Thrb | Thrb | 0 | 1.024825251 | 0.89 | 0.342 | 0 | Neuron |
| A330008L17Rik | A330008L17Rik | 0 | 1.023662005 | 0.517 | 0.078 | 0 | Neuron |
| Plcxd3 | Plcxd3 | 0 | 1.022352084 | 0.495 | 0.077 | 0 | Neuron |
| Add2 | Add2 | 0 | 1.021806463 | 0.777 | 0.137 | 0 | Neuron |
| Cap2 | Cap2 | 0 | 1.02072777 | 0.847 | 0.226 | 0 | Neuron |
| 9630028H03Rik | 9630028H03Rik | 0 | 1.018883688 | 0.679 | 0.122 | 0 | Neuron |
| Gm15738 | Gm15738 | 0 | 1.017846367 | 0.83 | 0.191 | 0 | Neuron |
| Kcnh7 | Kcnh7 | 0 | 1.017064048 | 0.673 | 0.246 | 0 | Neuron |
| Dgkg | Dgkg | 0 | 1.016946924 | 0.542 | 0.052 | 0 | Neuron |
| Adcy5 | Adcy5 | 0 | 1.01526357 | 0.88 | 0.395 | 0 | Neuron |
| Epha7 | Epha7 | 0 | 1.014071737 | 0.747 | 0.19 | 0 | Neuron |
| Slc24a4 | Slc24a4 | 0 | 1.014007424 | 0.623 | 0.09 | 0 | Neuron |
| Sgcd | Sgcd | 0 | 1.011321455 | 0.839 | 0.295 | 0 | Neuron |
| Slc4a10 | Slc4a10 | 0 | 1.011263831 | 0.867 | 0.235 | 0 | Neuron |
| Cttnbp2 | Cttnbp2 | 0 | 1.000698562 | 0.97 | 0.601 | 0 | Neuron |
| Il1rapl1 | Il1rapl1 | 0 | 1.000017797 | 0.995 | 0.87 | 0 | Neuron |
| Ank3 | Ank3 | 0 | 0.99784512 | 0.999 | 0.743 | 0 | Neuron |
| Galnt18 | Galnt18 | 0 | 0.99635433 | 0.759 | 0.207 | 0 | Neuron |
| Cntn3 | Cntn3 | 0 | 0.993287271 | 0.822 | 0.286 | 0 | Neuron |
| Gm45159 | Gm45159 | 0 | 0.993251173 | 0.674 | 0.083 | 0 | Neuron |
| Aff3 | Aff3 | 0 | 0.98929092 | 0.898 | 0.304 | 0 | Neuron |
| Prkcb | Prkcb | 0 | 0.986286718 | 0.968 | 0.612 | 0 | Neuron |
| Gucy1a2 | Gucy1a2 | 0 | 0.985342743 | 0.887 | 0.257 | 0 | Neuron |
| Lrrk2 | Lrrk2 | 0 | 0.984944619 | 0.677 | 0.146 | 0 | Neuron |
| Mapk10 | Mapk10 | 0 | 0.981494965 | 0.97 | 0.413 | 0 | Neuron |
| Sgk1 | Sgk1 | 0 | 0.979904208 | 0.741 | 0.217 | 0 | Neuron |
| C130073E24Rik | C130073E24Rik | 0 | 0.979707209 | 0.493 | 0.116 | 0 | Neuron |
| Gsg1l | Gsg1l | 0 | 0.977792616 | 0.654 | 0.116 | 0 | Neuron |
| Fam19a2 | Fam19a2 | 0 | 0.969790248 | 0.593 | 0.159 | 0 | Neuron |
| Nrxn3 | Nrxn3 | 0 | 0.9692018 | 0.999 | 0.886 | 0 | Neuron |
| Focad | Focad | 0 | 0.96744086 | 0.896 | 0.27 | 0 | Neuron |
| Elmod1 | Elmod1 | 0 | 0.967056557 | 0.928 | 0.419 | 0 | Neuron |
| Cit | Cit | 0 | 0.965175258 | 0.79 | 0.173 | 0 | Neuron |
| Ppfia2 | Ppfia2 | 0 | 0.963691051 | 0.962 | 0.39 | 0 | Neuron |
| Mkl2 | Mkl2 | 0 | 0.962109894 | 0.922 | 0.351 | 0 | Neuron |
| Robo2 | Robo2 | 0 | 0.960229366 | 0.95 | 0.452 | 0 | Neuron |
| Sh3rf2 | Sh3rf2 | 0 | 0.957383933 | 0.497 | 0.057 | 0 | Neuron |
| Jazf1 | Jazf1 | 0 | 0.956141713 | 0.803 | 0.178 | 0 | Neuron |
| Rap1gap | Rap1gap | 0 | 0.955975884 | 0.853 | 0.263 | 0 | Neuron |
| Arl15 | Arl15 | 0 | 0.954624606 | 0.943 | 0.42 | 0 | Neuron |
| Nalcn | Nalcn | 0 | 0.953024172 | 0.95 | 0.351 | 0 | Neuron |
| Cntnap3 | Cntnap3 | 0 | 0.949620761 | 0.447 | 0.071 | 0 | Neuron |
| Reep1 | Reep1 | 0 | 0.94565419 | 0.817 | 0.181 | 0 | Neuron |
| Syn3 | Syn3 | 0 | 0.945239749 | 0.827 | 0.206 | 0 | Neuron |
| Dock3 | Dock3 | 0 | 0.944569845 | 0.988 | 0.577 | 0 | Neuron |
| Rit1.1 | Rit1.1 | 0 | 0.944401375 | 0.873 | 0.336 | 0 | Neuron |
| Pde1c | Pde1c | 0 | 0.942948162 | 0.693 | 0.321 | 0 | Neuron |
| Pld5 | Pld5 | 0 | 0.942355321 | 0.45 | 0.072 | 0 | Neuron |
| Gm26835 | Gm26835 | 0 | 0.942222806 | 0.796 | 0.175 | 0 | Neuron |
| Ptprr | Ptprr | 0 | 0.940887302 | 0.643 | 0.105 | 0 | Neuron |
| Samd5 | Samd5 | 0 | 0.938614903 | 0.587 | 0.116 | 0 | Neuron |
| Fgf12 | Fgf12 | 0 | 0.937133791 | 0.883 | 0.301 | 0 | Neuron |
| Epha5 | Epha5 | 0 | 0.929659168 | 0.828 | 0.313 | 0 | Neuron |
| Ntng1 | Ntng1 | 0 | 0.925814101 | 0.44 | 0.114 | 0 | Neuron |
| Ano2 | Ano2 | 0 | 0.918691502 | 0.48 | 0.055 | 0 | Neuron |
| Cacna2d1 | Cacna2d1 | 0 | 0.915119481 | 0.9 | 0.416 | 0 | Neuron |
| Runx1t1 | Runx1t1 | 0 | 0.914063333 | 0.9 | 0.292 | 0 | Neuron |
| Scn2a | Scn2a | 0 | 0.913690587 | 0.956 | 0.381 | 0 | Neuron |
| B230209E15Rik | B230209E15Rik | 0 | 0.912920067 | 0.703 | 0.127 | 0 | Neuron |
| Gabra4 | Gabra4 | 0 | 0.910184008 | 0.787 | 0.22 | 0 | Neuron |
| Msra | Msra | 0 | 0.908709779 | 0.78 | 0.221 | 0 | Neuron |
| Tmem132b | Tmem132b | 0 | 0.908195882 | 0.905 | 0.335 | 0 | Neuron |
| Ak5 | Ak5 | 0 | 0.905387739 | 0.538 | 0.09 | 0 | Neuron |
| Gm13269 | Gm13269 | 0 | 0.905206078 | 0.565 | 0.06 | 0 | Neuron |
| Sorcs3 | Sorcs3 | 0 | 0.904148418 | 0.715 | 0.216 | 0 | Neuron |
| Kctd1 | Kctd1 | 0 | 0.903819475 | 0.779 | 0.214 | 0 | Neuron |
| C78859 | C78859 | 0 | 0.89443356 | 0.659 | 0.099 | 0 | Neuron |
| Wipf3 | Wipf3 | 0 | 0.892325225 | 0.638 | 0.11 | 0 | Neuron |
| Nhs | Nhs | 0 | 0.891965835 | 0.541 | 0.096 | 0 | Neuron |
| Tbc1d8 | Tbc1d8 | 0 | 0.890843462 | 0.689 | 0.138 | 0 | Neuron |
| Osbpl6 | Osbpl6 | 0 | 0.890454372 | 0.754 | 0.168 | 0 | Neuron |
| Prkar2b | Prkar2b | 0 | 0.889600749 | 0.748 | 0.165 | 0 | Neuron |
| Cntn1 | Cntn1 | 0 | 0.88956955 | 0.975 | 0.427 | 0 | Neuron |
| Sorbs2os | Sorbs2os | 0 | 0.884998669 | 0.709 | 0.12 | 0 | Neuron |
| Ppp2r2b | Ppp2r2b | 0 | 0.883581438 | 0.986 | 0.497 | 0 | Neuron |
| Ppargc1b | Ppargc1b | 0 | 0.882051205 | 0.616 | 0.062 | 0 | Neuron |
| Ppp4r4 | Ppp4r4 | 0 | 0.881995043 | 0.681 | 0.123 | 0 | Neuron |
| Nin | Nin | 0 | 0.879058347 | 0.78 | 0.182 | 0 | Neuron |
| Rasgef1a | Rasgef1a | 0 | 0.878747734 | 0.792 | 0.178 | 0 | Neuron |
| Phf24 | Phf24 | 0 | 0.877614837 | 0.728 | 0.137 | 0 | Neuron |
| Atp2b2 | Atp2b2 | 0 | 0.873170723 | 0.958 | 0.45 | 0 | Neuron |
| Syt6 | Syt6 | 0 | 0.872079952 | 0.607 | 0.108 | 0 | Neuron |
| Cadps | Cadps | 0 | 0.870239174 | 0.944 | 0.385 | 0 | Neuron |
| Pdzd4 | Pdzd4 | 0 | 0.868181003 | 0.722 | 0.131 | 0 | Neuron |
| A330102I10Rik | A330102I10Rik | 0 | 0.866956912 | 0.583 | 0.083 | 0 | Neuron |
| Cers6 | Cers6 | 0 | 0.866261421 | 0.778 | 0.174 | 0 | Neuron |
| Gria2 | Gria2 | 0 | 0.866240703 | 0.999 | 0.799 | 0 | Neuron |
| Cntn6 | Cntn6 | 0 | 0.862842382 | 0.664 | 0.143 | 0 | Neuron |
| Snap25 | Snap25 | 0 | 0.861404858 | 0.992 | 0.61 | 0 | Neuron |
| Nipal2 | Nipal2 | 0 | 0.859942308 | 0.619 | 0.086 | 0 | Neuron |
| Dclk1 | Dclk1 | 0 | 0.856933167 | 0.992 | 0.571 | 0 | Neuron |
| Homer1 | Homer1 | 0 | 0.854365604 | 0.852 | 0.322 | 0 | Neuron |
| Cacna1d | Cacna1d | 0 | 0.854222813 | 0.918 | 0.303 | 0 | Neuron |
| Ftx | Ftx | 0 | 0.847798943 | 0.861 | 0.245 | 0 | Neuron |
| Dlgap1 | Dlgap1 | 0 | 0.847220462 | 0.967 | 0.553 | 0 | Neuron |
| Baiap2 | Baiap2 | 0 | 0.844960407 | 0.818 | 0.27 | 0 | Neuron |
| Scn3a | Scn3a | 0 | 0.84360262 | 0.815 | 0.212 | 0 | Neuron |
| Epb41l1 | Epb41l1 | 0 | 0.838913292 | 0.818 | 0.204 | 0 | Neuron |
| Ric8b | Ric8b | 0 | 0.838539775 | 0.831 | 0.264 | 0 | Neuron |
| Syn2 | Syn2 | 0 | 0.837173909 | 0.895 | 0.326 | 0 | Neuron |
| Mtcl1 | Mtcl1 | 0 | 0.833343203 | 0.726 | 0.189 | 0 | Neuron |
| Arhgap20 | Arhgap20 | 0 | 0.832934612 | 0.683 | 0.127 | 0 | Neuron |
| Arhgef9 | Arhgef9 | 0 | 0.832897895 | 0.888 | 0.329 | 0 | Neuron |
| Gm17276 | Gm17276 | 0 | 0.831570823 | 0.619 | 0.083 | 0 | Neuron |
| Mmp16 | Mmp16 | 0 | 0.830442436 | 0.933 | 0.341 | 0 | Neuron |
| Fstl5 | Fstl5 | 0 | 0.829844357 | 0.509 | 0.127 | 0 | Neuron |
| Wscd2 | Wscd2 | 0 | 0.827353689 | 0.6 | 0.079 | 0 | Neuron |
| Shank3 | Shank3 | 0 | 0.826367326 | 0.665 | 0.101 | 0 | Neuron |
| Sema3a | Sema3a | 0 | 0.822812529 | 0.464 | 0.087 | 0 | Neuron |
| B230334C09Rik | B230334C09Rik | 0 | 0.821737058 | 0.769 | 0.174 | 0 | Neuron |
| Klhl3 | Klhl3 | 0 | 0.821299914 | 0.652 | 0.104 | 0 | Neuron |
| Mdga2 | Mdga2 | 0 | 0.821009224 | 0.999 | 0.859 | 0 | Neuron |
| Plekha6 | Plekha6 | 0 | 0.816776139 | 0.658 | 0.114 | 0 | Neuron |
| Gm20642 | Gm20642 | 0 | 0.812651208 | 0.443 | 0.047 | 0 | Neuron |
| Ppp3ca | Ppp3ca | 0 | 0.811430439 | 0.997 | 0.938 | 0 | Neuron |
| Ankrd33b | Ankrd33b | 0 | 0.803977099 | 0.502 | 0.055 | 0 | Neuron |
| Neto2 | Neto2 | 0 | 0.802761756 | 0.748 | 0.219 | 0 | Neuron |
| Stk32a | Stk32a | 0 | 0.802149003 | 0.591 | 0.12 | 0 | Neuron |
| Kif26b | Kif26b | 0 | 0.798520024 | 0.535 | 0.076 | 0 | Neuron |
| Rab3c | Rab3c | 0 | 0.798321894 | 0.818 | 0.26 | 0 | Neuron |
| Dapk1 | Dapk1 | 0 | 0.797410121 | 0.831 | 0.239 | 0 | Neuron |
| Atp2b1 | Atp2b1 | 0 | 0.796691123 | 0.977 | 0.714 | 0 | Neuron |
| 4930555F03Rik | 4930555F03Rik | 0 | 0.795132892 | 0.329 | 0.037 | 0 | Neuron |
| Nell2 | Nell2 | 0 | 0.794856601 | 0.828 | 0.264 | 0 | Neuron |
| Arhgap26 | Arhgap26 | 0 | 0.794823985 | 0.942 | 0.369 | 0 | Neuron |
| Strip2 | Strip2 | 0 | 0.793091743 | 0.616 | 0.134 | 0 | Neuron |
| Gm10848 | Gm10848 | 0 | 0.791280271 | 0.484 | 0.048 | 0 | Neuron |
| Hmgcll1 | Hmgcll1 | 0 | 0.790901286 | 0.758 | 0.172 | 0 | Neuron |
| Pak3 | Pak3 | 0 | 0.790294476 | 0.916 | 0.341 | 0 | Neuron |
| Grb10 | Grb10 | 0 | 0.78913473 | 0.602 | 0.095 | 0 | Neuron |
| Vat1l | Vat1l | 0 | 0.789088647 | 0.549 | 0.108 | 0 | Neuron |
| Pcnx2 | Pcnx2 | 0 | 0.788759075 | 0.597 | 0.073 | 0 | Neuron |
| Kcnip2 | Kcnip2 | 0 | 0.788346984 | 0.662 | 0.129 | 0 | Neuron |
| Adam23 | Adam23 | 0 | 0.787942712 | 0.938 | 0.413 | 0 | Neuron |
| Prkch | Prkch | 0 | 0.784513967 | 0.59 | 0.116 | 0 | Neuron |
| Upp2 | Upp2 | 0 | 0.783044491 | 0.862 | 0.317 | 0 | Neuron |
| Scn8a | Scn8a | 0 | 0.782047703 | 0.896 | 0.314 | 0 | Neuron |
| Gm13052 | Gm13052 | 0 | 0.781471558 | 0.618 | 0.096 | 0 | Neuron |
| Agbl4 | Agbl4 | 0 | 0.77753578 | 0.77 | 0.28 | 0 | Neuron |
| Svop | Svop | 0 | 0.777511222 | 0.689 | 0.116 | 0 | Neuron |
| Syt7 | Syt7 | 0 | 0.774893848 | 0.621 | 0.102 | 0 | Neuron |
| Pigk | Pigk | 0 | 0.773455198 | 0.763 | 0.206 | 0 | Neuron |
| Gm45881 | Gm45881 | 0 | 0.771879446 | 0.587 | 0.143 | 0 | Neuron |
| Kcnq1ot1 | Kcnq1ot1 | 0 | 0.768438445 | 0.947 | 0.408 | 0 | Neuron |
| Sorcs2 | Sorcs2 | 0 | 0.767234193 | 0.692 | 0.201 | 0 | Neuron |
| Efna5 | Efna5 | 0 | 0.766752998 | 0.619 | 0.189 | 0 | Neuron |
| Arfgef3 | Arfgef3 | 0 | 0.765567017 | 0.719 | 0.152 | 0 | Neuron |
| Plcl2 | Plcl2 | 0 | 0.763325016 | 0.909 | 0.283 | 0 | Neuron |
| Ldb2 | Ldb2 | 0 | 0.761441078 | 0.667 | 0.186 | 0 | Neuron |
| Nup93 | Nup93 | 0 | 0.760300887 | 0.698 | 0.152 | 0 | Neuron |
| Ptk2b | Ptk2b | 0 | 0.759023773 | 0.719 | 0.173 | 0 | Neuron |
| Tiam1 | Tiam1 | 0 | 0.756795753 | 0.637 | 0.122 | 0 | Neuron |
| Cdh4 | Cdh4 | 0 | 0.756463693 | 0.43 | 0.124 | 0 | Neuron |
| Htr4 | Htr4 | 0 | 0.756390126 | 0.296 | 0.025 | 0 | Neuron |
| Cdh11 | Cdh11 | 0 | 0.753606677 | 0.757 | 0.292 | 0 | Neuron |
| Epb41 | Epb41 | 0 | 0.751814819 | 0.792 | 0.242 | 0 | Neuron |
| Ablim2 | Ablim2 | 0 | 0.749631485 | 0.895 | 0.317 | 0 | Neuron |
| Gm48003 | Gm48003 | 0 | 0.749252294 | 0.449 | 0.035 | 0 | Neuron |
| Sgip1 | Sgip1 | 0 | 0.749068368 | 0.98 | 0.532 | 0 | Neuron |
| Gm16432 | Gm16432 | 0 | 0.748369642 | 0.681 | 0.151 | 0 | Neuron |
| A230057D06Rik | A230057D06Rik | 0 | 0.748124405 | 0.796 | 0.229 | 0 | Neuron |
| Lzts1 | Lzts1 | 0 | 0.744220216 | 0.578 | 0.091 | 0 | Neuron |
| Prmt8 | Prmt8 | 0 | 0.744036407 | 0.546 | 0.07 | 0 | Neuron |
| Iqgap2 | Iqgap2 | 0 | 0.739100151 | 0.555 | 0.101 | 0 | Neuron |
| Dtnbos | Dtnbos | 0 | 0.738071184 | 0.562 | 0.078 | 0 | Neuron |
| Rgs7 | Rgs7 | 0 | 0.73426131 | 0.957 | 0.381 | 0 | Neuron |
| Fam110b | Fam110b | 0 | 0.732808 | 0.809 | 0.241 | 0 | Neuron |
| Bcr | Bcr | 0 | 0.732601241 | 0.752 | 0.203 | 0 | Neuron |
| Fnbp1l | Fnbp1l | 0 | 0.732434365 | 0.835 | 0.258 | 0 | Neuron |
| Arhgap44 | Arhgap44 | 0 | 0.730984482 | 0.609 | 0.109 | 0 | Neuron |
| Arhgap18 | Arhgap18 | 0 | 0.730598655 | 0.634 | 0.126 | 0 | Neuron |
| R3hdm1 | R3hdm1 | 0 | 0.730245325 | 0.979 | 0.63 | 0 | Neuron |
| Reps2 | Reps2 | 0 | 0.729781945 | 0.829 | 0.252 | 0 | Neuron |
| Lncpint | Lncpint | 0 | 0.729705732 | 0.981 | 0.543 | 0 | Neuron |
| Mhrt | Mhrt | 0 | 0.727022981 | 0.426 | 0.045 | 0 | Neuron |
| Rab27b | Rab27b | 0 | 0.726692412 | 0.528 | 0.1 | 0 | Neuron |
| Nhsl2 | Nhsl2 | 0 | 0.725847249 | 0.615 | 0.102 | 0 | Neuron |
| Dchs2 | Dchs2 | 0 | 0.724923023 | 0.536 | 0.084 | 0 | Neuron |
| Mlip | Mlip | 0 | 0.724174788 | 0.428 | 0.053 | 0 | Neuron |
| Bsn | Bsn | 0 | 0.723168285 | 0.653 | 0.118 | 0 | Neuron |
| Shank2 | Shank2 | 0 | 0.719764836 | 0.73 | 0.132 | 0 | Neuron |
| Traip | Traip | 0 | 0.717798607 | 0.47 | 0.057 | 0 | Neuron |
| Syt14 | Syt14 | 0 | 0.717206547 | 0.699 | 0.15 | 0 | Neuron |
| Tenm3 | Tenm3 | 0 | 0.716732477 | 0.903 | 0.461 | 0 | Neuron |
| Ssbp2 | Ssbp2 | 0 | 0.715592696 | 0.953 | 0.522 | 0 | Neuron |
| Sv2b | Sv2b | 0 | 0.714855641 | 0.564 | 0.109 | 0 | Neuron |
| Rerg | Rerg | 0 | 0.709621607 | 0.426 | 0.05 | 0 | Neuron |
| Fry | Fry | 0 | 0.705322696 | 0.977 | 0.48 | 0 | Neuron |
| Bicdl1 | Bicdl1 | 0 | 0.701853671 | 0.553 | 0.074 | 0 | Neuron |
| Pde8b | Pde8b | 0 | 0.69843406 | 0.891 | 0.344 | 0 | Neuron |
| Sptb | Sptb | 0 | 0.698080885 | 0.547 | 0.072 | 0 | Neuron |
| Gm1604a | Gm1604a | 0 | 0.695873391 | 0.473 | 0.048 | 0 | Neuron |
| Rbms1 | Rbms1 | 0 | 0.692942139 | 0.775 | 0.268 | 0 | Neuron |
| Snrpn | Snrpn | 0 | 0.69277613 | 0.705 | 0.15 | 0 | Neuron |
| Sntb2 | Sntb2 | 0 | 0.691635528 | 0.565 | 0.109 | 0 | Neuron |
| Pde4a | Pde4a | 0 | 0.689681897 | 0.606 | 0.111 | 0 | Neuron |
| Klhl1 | Klhl1 | 0 | 0.68915588 | 0.377 | 0.057 | 0 | Neuron |
| Kcnq2 | Kcnq2 | 0 | 0.689079159 | 0.685 | 0.133 | 0 | Neuron |
| Cdh7 | Cdh7 | 0 | 0.68819179 | 0.478 | 0.087 | 0 | Neuron |
| Ptpn5 | Ptpn5 | 0 | 0.684515574 | 0.75 | 0.2 | 0 | Neuron |
| Kcnb1 | Kcnb1 | 0 | 0.683632419 | 0.699 | 0.165 | 0 | Neuron |
| Dmd | Dmd | 0 | 0.682956534 | 0.965 | 0.585 | 0 | Neuron |
| Plxna2 | Plxna2 | 0 | 0.681548203 | 0.823 | 0.241 | 0 | Neuron |
| Large1 | Large1 | 0 | 0.680117873 | 0.974 | 0.54 | 0 | Neuron |
| Kcnq3 | Kcnq3 | 0 | 0.679527881 | 0.959 | 0.615 | 0 | Neuron |
| Ralgapa2 | Ralgapa2 | 0 | 0.679275075 | 0.867 | 0.321 | 0 | Neuron |
| Eml5 | Eml5 | 0 | 0.676055331 | 0.877 | 0.317 | 0 | Neuron |
| Ulk4 | Ulk4 | 0 | 0.673511091 | 0.665 | 0.131 | 0 | Neuron |
| Lmo3 | Lmo3 | 0 | 0.673240897 | 0.652 | 0.173 | 0 | Neuron |
| Adarb1 | Adarb1 | 0 | 0.673200309 | 0.594 | 0.101 | 0 | Neuron |
| Susd4 | Susd4 | 0 | 0.67318062 | 0.63 | 0.119 | 0 | Neuron |
| Ppp1r9a | Ppp1r9a | 0 | 0.672916047 | 0.977 | 0.675 | 0 | Neuron |
| Armc9 | Armc9 | 0 | 0.670524033 | 0.705 | 0.165 | 0 | Neuron |
| Gpr149 | Gpr149 | 0 | 0.668088634 | 0.298 | 0.042 | 0 | Neuron |
| Oprm1 | Oprm1 | 0 | 0.667375311 | 0.406 | 0.071 | 0 | Neuron |
| Unc13a | Unc13a | 0 | 0.666997406 | 0.592 | 0.098 | 0 | Neuron |
| Kcnk2 | Kcnk2 | 0 | 0.666100172 | 0.719 | 0.272 | 0 | Neuron |
| Camk2b | Camk2b | 0 | 0.665140818 | 0.865 | 0.329 | 0 | Neuron |
| Dzank1 | Dzank1 | 0 | 0.664723466 | 0.73 | 0.184 | 0 | Neuron |
| Col6a1 | Col6a1 | 0 | 0.663766381 | 0.421 | 0.053 | 0 | Neuron |
| Pde1b | Pde1b | 0 | 0.663752722 | 0.709 | 0.203 | 0 | Neuron |
| Smyd3 | Smyd3 | 0 | 0.662803535 | 0.93 | 0.46 | 0 | Neuron |
| Gda | Gda | 0 | 0.657329642 | 0.63 | 0.15 | 0 | Neuron |
| Csmd3 | Csmd3 | 0 | 0.655836032 | 0.998 | 0.802 | 0 | Neuron |
| 4930545L23Rik | 4930545L23Rik | 0 | 0.655393009 | 0.425 | 0.055 | 0 | Neuron |
| Sntg2 | Sntg2 | 0 | 0.65505552 | 0.386 | 0.071 | 0 | Neuron |
| Adgrl2 | Adgrl2 | 0 | 0.654634179 | 0.719 | 0.189 | 0 | Neuron |
| Clvs2 | Clvs2 | 0 | 0.654359102 | 0.512 | 0.063 | 0 | Neuron |
| Mark1 | Mark1 | 0 | 0.652842049 | 0.693 | 0.167 | 0 | Neuron |
| Rbfox2 | Rbfox2 | 0 | 0.651909985 | 0.951 | 0.431 | 0 | Neuron |
| Stox2 | Stox2 | 0 | 0.651607914 | 0.962 | 0.651 | 0 | Neuron |
| Myo16 | Myo16 | 0 | 0.650533949 | 0.524 | 0.124 | 0 | Neuron |
| Snph | Snph | 0 | 0.65049231 | 0.608 | 0.115 | 0 | Neuron |
| Kif17 | Kif17 | 0 | 0.649287639 | 0.466 | 0.052 | 0 | Neuron |
| Tln2 | Tln2 | 0 | 0.646753217 | 0.834 | 0.277 | 0 | Neuron |
| Clmp | Clmp | 0 | 0.645727197 | 0.457 | 0.069 | 0 | Neuron |
| Scn9a | Scn9a | 0 | 0.645356798 | 0.384 | 0.042 | 0 | Neuron |
| Sema3e | Sema3e | 0 | 0.644983691 | 0.456 | 0.124 | 0 | Neuron |
| Slc7a14 | Slc7a14 | 0 | 0.644793351 | 0.61 | 0.128 | 0 | Neuron |
| Man2a1 | Man2a1 | 0 | 0.642032699 | 0.6 | 0.135 | 0 | Neuron |
| Ror1 | Ror1 | 0 | 0.640617088 | 0.406 | 0.077 | 0 | Neuron |
| Ano6 | Ano6 | 0 | 0.640283368 | 0.709 | 0.175 | 0 | Neuron |
| Gm42722 | Gm42722 | 0 | 0.638986639 | 0.5 | 0.082 | 0 | Neuron |
| Rcan2 | Rcan2 | 0 | 0.638212856 | 0.901 | 0.427 | 0 | Neuron |
| Gabrg2 | Gabrg2 | 0 | 0.637664882 | 0.694 | 0.167 | 0 | Neuron |
| Spock1 | Spock1 | 0 | 0.637174149 | 0.829 | 0.276 | 0 | Neuron |
| 2900055J20Rik | 2900055J20Rik | 0 | 0.635728399 | 0.518 | 0.069 | 0 | Neuron |
| Trim46 | Trim46 | 0 | 0.635232647 | 0.553 | 0.086 | 0 | Neuron |
| Sh3gl2 | Sh3gl2 | 0 | 0.630376115 | 0.688 | 0.188 | 0 | Neuron |
| Rps6ka3 | Rps6ka3 | 0 | 0.628526737 | 0.822 | 0.312 | 0 | Neuron |
| Strn | Strn | 0 | 0.627590037 | 0.798 | 0.369 | 0 | Neuron |
| Rap1gap2 | Rap1gap2 | 0 | 0.626045102 | 0.566 | 0.095 | 0 | Neuron |
| Nptn | Nptn | 0 | 0.626030132 | 0.975 | 0.594 | 0 | Neuron |
| Celf5 | Celf5 | 0 | 0.625848454 | 0.674 | 0.145 | 0 | Neuron |
| Sybu | Sybu | 0 | 0.625840536 | 0.886 | 0.335 | 0 | Neuron |
| Kirrel3 | Kirrel3 | 0 | 0.624905533 | 0.954 | 0.621 | 0 | Neuron |
| Gm2163 | Gm2163 | 0 | 0.62473302 | 0.751 | 0.207 | 0 | Neuron |
| Fam49a | Fam49a | 0 | 0.622185084 | 0.745 | 0.224 | 0 | Neuron |
| Gm15261 | Gm15261 | 0 | 0.620883364 | 0.34 | 0.042 | 0 | Neuron |
| Lrfn2 | Lrfn2 | 0 | 0.620608989 | 0.4 | 0.061 | 0 | Neuron |
| Actn1 | Actn1 | 0 | 0.61804054 | 0.626 | 0.142 | 0 | Neuron |
| Tusc3 | Tusc3 | 0 | 0.617977524 | 0.821 | 0.282 | 0 | Neuron |
| Nbea | Nbea | 0 | 0.617910741 | 0.997 | 0.793 | 0 | Neuron |
| Tspoap1 | Tspoap1 | 0 | 0.616954998 | 0.627 | 0.128 | 0 | Neuron |
| Slc2a3 | Slc2a3 | 0 | 0.616645917 | 0.616 | 0.129 | 0 | Neuron |
| 4-Mar | 4-Mar | 0 | 0.616331293 | 0.458 | 0.061 | 0 | Neuron |
| Dclk3 | Dclk3 | 0 | 0.612958456 | 0.446 | 0.057 | 0 | Neuron |
| Macrod2os1 | Macrod2os1 | 0 | 0.612297088 | 0.429 | 0.048 | 0 | Neuron |
| Jakmip2 | Jakmip2 | 0 | 0.612274145 | 0.813 | 0.248 | 0 | Neuron |
| Gm45323 | Gm45323 | 0 | 0.612143177 | 0.318 | 0.052 | 0 | Neuron |
| Fndc9 | Fndc9 | 0 | 0.611345906 | 0.482 | 0.058 | 0 | Neuron |
| Lrrfip1 | Lrrfip1 | 0 | 0.608458889 | 0.642 | 0.144 | 0 | Neuron |
| Hook1 | Hook1 | 0 | 0.60733541 | 0.597 | 0.112 | 0 | Neuron |
| Bcl11a | Bcl11a | 0 | 0.607288267 | 0.785 | 0.209 | 0 | Neuron |
| Mpp6 | Mpp6 | 0 | 0.606520923 | 0.738 | 0.228 | 0 | Neuron |
| Stau2 | Stau2 | 0 | 0.60597087 | 0.807 | 0.269 | 0 | Neuron |
| Gm45846 | Gm45846 | 0 | 0.605651138 | 0.549 | 0.117 | 0 | Neuron |
| Lrrc3b | Lrrc3b | 0 | 0.603012793 | 0.394 | 0.037 | 0 | Neuron |
| Gm20696 | Gm20696 | 0 | 0.60185114 | 0.534 | 0.094 | 0 | Neuron |
| 2900011O08Rik | 2900011O08Rik | 0 | 0.60175683 | 0.631 | 0.136 | 0 | Neuron |
| 1700111E14Rik | 1700111E14Rik | 0 | 0.601601433 | 0.56 | 0.115 | 0 | Neuron |
| Gm26565 | Gm26565 | 0 | 0.601215342 | 0.36 | 0.027 | 0 | Neuron |
| Gm5441 | Gm5441 | 0 | 0.601157077 | 0.501 | 0.076 | 0 | Neuron |
| Slc44a5 | Slc44a5 | 0 | 0.59938828 | 0.422 | 0.091 | 0 | Neuron |
| Snap91 | Snap91 | 0 | 0.591786029 | 0.812 | 0.283 | 0 | Neuron |
| Slc9a7 | Slc9a7 | 0 | 0.591604202 | 0.568 | 0.1 | 0 | Neuron |
| Sgsm1 | Sgsm1 | 0 | 0.590131202 | 0.505 | 0.088 | 0 | Neuron |
| Chrna7 | Chrna7 | 0 | 0.587722983 | 0.379 | 0.044 | 0 | Neuron |
| Osbpl10 | Osbpl10 | 0 | 0.587275769 | 0.407 | 0.061 | 0 | Neuron |
| Plppr5 | Plppr5 | 0 | 0.585558328 | 0.659 | 0.15 | 0 | Neuron |
| Atp8a2 | Atp8a2 | 0 | 0.585480398 | 0.803 | 0.21 | 0 | Neuron |
| 5330434G04Rik | 5330434G04Rik | 0 | 0.585170073 | 0.721 | 0.248 | 0 | Neuron |
| Grid2 | Grid2 | 0 | 0.585084165 | 0.98 | 0.835 | 0 | Neuron |
| Kcnh5 | Kcnh5 | 0 | 0.58249924 | 0.497 | 0.106 | 0 | Neuron |
| Atp2b3 | Atp2b3 | 0 | 0.58215428 | 0.438 | 0.044 | 0 | Neuron |
| Arhgap6 | Arhgap6 | 0 | 0.579918611 | 0.527 | 0.123 | 0 | Neuron |
| Meis2 | Meis2 | 0 | 0.578920882 | 0.917 | 0.657 | 0 | Neuron |
| Ccdc88c | Ccdc88c | 0 | 0.578473454 | 0.59 | 0.171 | 0 | Neuron |
| Kcnq1 | Kcnq1 | 0 | 0.578236653 | 0.702 | 0.182 | 0 | Neuron |
| Banf2 | Banf2 | 0 | 0.57589388 | 0.395 | 0.041 | 0 | Neuron |
| Mllt3 | Mllt3 | 0 | 0.57540408 | 0.888 | 0.364 | 0 | Neuron |
| Gm44593 | Gm44593 | 0 | 0.575040833 | 0.531 | 0.133 | 0 | Neuron |
| Mtmr7 | Mtmr7 | 0 | 0.574472535 | 0.552 | 0.097 | 0 | Neuron |
| Pi4ka | Pi4ka | 0 | 0.573756602 | 0.893 | 0.368 | 0 | Neuron |
| 1700024B18Rik | 1700024B18Rik | 0 | 0.572190626 | 0.402 | 0.04 | 0 | Neuron |
| Rps6ka2 | Rps6ka2 | 0 | 0.571901123 | 0.559 | 0.123 | 0 | Neuron |
| Nsf | Nsf | 0 | 0.571288678 | 0.897 | 0.373 | 0 | Neuron |
| A330015K06Rik | A330015K06Rik | 0 | 0.570198915 | 0.806 | 0.297 | 0 | Neuron |
| Dip2c | Dip2c | 0 | 0.568541528 | 0.986 | 0.614 | 0 | Neuron |
| Grik5 | Grik5 | 0 | 0.566229264 | 0.717 | 0.209 | 0 | Neuron |
| Ttc3 | Ttc3 | 0 | 0.566195029 | 0.986 | 0.638 | 0 | Neuron |
| Lin28b | Lin28b | 0 | 0.564322395 | 0.464 | 0.072 | 0 | Neuron |
| Gm46102 | Gm46102 | 0 | 0.563912005 | 0.284 | 0.025 | 0 | Neuron |
| Gm26906 | Gm26906 | 0 | 0.563699559 | 0.408 | 0.034 | 0 | Neuron |
| Chn1 | Chn1 | 0 | 0.563241775 | 0.894 | 0.426 | 0 | Neuron |
| Nmnat2 | Nmnat2 | 0 | 0.562239091 | 0.736 | 0.204 | 0 | Neuron |
| Map1b | Map1b | 0 | 0.560303516 | 0.939 | 0.445 | 0 | Neuron |
| Ptchd1 | Ptchd1 | 0 | 0.555058182 | 0.4 | 0.051 | 0 | Neuron |
| Cacng2 | Cacng2 | 0 | 0.55317868 | 0.503 | 0.086 | 0 | Neuron |
| Ajap1 | Ajap1 | 0 | 0.552760001 | 0.526 | 0.093 | 0 | Neuron |
| Smarca1 | Smarca1 | 0 | 0.548167761 | 0.518 | 0.091 | 0 | Neuron |
| Rundc3b | Rundc3b | 0 | 0.547406292 | 0.676 | 0.168 | 0 | Neuron |
| C2cd5 | C2cd5 | 0 | 0.544667446 | 0.898 | 0.381 | 0 | Neuron |
| Rnf112 | Rnf112 | 0 | 0.544017581 | 0.562 | 0.116 | 0 | Neuron |
| Gm13974 | Gm13974 | 0 | 0.542334195 | 0.316 | 0.046 | 0 | Neuron |
| Gm11418 | Gm11418 | 0 | 0.541212795 | 0.301 | 0.015 | 0 | Neuron |
| Gm44151 | Gm44151 | 0 | 0.540096219 | 0.515 | 0.097 | 0 | Neuron |
| Myo5a | Myo5a | 0 | 0.539478486 | 0.885 | 0.367 | 0 | Neuron |
| Fam184b | Fam184b | 0 | 0.53889004 | 0.569 | 0.132 | 0 | Neuron |
| Gpr176 | Gpr176 | 0 | 0.537780592 | 0.364 | 0.045 | 0 | Neuron |
| Zkscan16 | Zkscan16 | 0 | 0.53674435 | 0.441 | 0.065 | 0 | Neuron |
| Actr3b | Actr3b | 0 | 0.535973396 | 0.597 | 0.13 | 0 | Neuron |
| Camkk2 | Camkk2 | 0 | 0.535028916 | 0.625 | 0.16 | 0 | Neuron |
| Sorbs1 | Sorbs1 | 0 | 0.53431498 | 0.951 | 0.463 | 0 | Neuron |
| Prkag2 | Prkag2 | 0 | 0.534198579 | 0.574 | 0.124 | 0 | Neuron |
| Gm15813 | Gm15813 | 0 | 0.532058506 | 0.368 | 0.044 | 0 | Neuron |
| Osbpl3 | Osbpl3 | 0 | 0.531553356 | 0.417 | 0.072 | 0 | Neuron |
| Atp6v0a1 | Atp6v0a1 | 0 | 0.530333338 | 0.898 | 0.383 | 0 | Neuron |
| Zfp831 | Zfp831 | 0 | 0.529747385 | 0.367 | 0.038 | 0 | Neuron |
| Dmtn | Dmtn | 0 | 0.529670172 | 0.542 | 0.099 | 0 | Neuron |
| Gpr45 | Gpr45 | 0 | 0.529542064 | 0.405 | 0.062 | 0 | Neuron |
| Tmem63c | Tmem63c | 0 | 0.528462566 | 0.389 | 0.035 | 0 | Neuron |
| Trpc7 | Trpc7 | 0 | 0.528175497 | 0.285 | 0.027 | 0 | Neuron |
| Chl1 | Chl1 | 0 | 0.527581863 | 0.569 | 0.156 | 0 | Neuron |
| Prkcg | Prkcg | 0 | 0.527008658 | 0.472 | 0.09 | 0 | Neuron |
| Cnnm1 | Cnnm1 | 0 | 0.526019924 | 0.483 | 0.075 | 0 | Neuron |
| Cacna1i | Cacna1i | 0 | 0.524677268 | 0.403 | 0.045 | 0 | Neuron |
| Adcy9 | Adcy9 | 0 | 0.524271324 | 0.786 | 0.273 | 0 | Neuron |
| Snca | Snca | 0 | 0.523114671 | 0.739 | 0.26 | 0 | Neuron |
| Kif5c | Kif5c | 0 | 0.522572659 | 0.733 | 0.216 | 0 | Neuron |
| Susd1 | Susd1 | 0 | 0.522398847 | 0.42 | 0.063 | 0 | Neuron |
| Syn1 | Syn1 | 0 | 0.521898537 | 0.616 | 0.152 | 0 | Neuron |
| Glt1d1 | Glt1d1 | 0 | 0.521783775 | 0.393 | 0.044 | 0 | Neuron |
| Neurl1a | Neurl1a | 0 | 0.521504812 | 0.451 | 0.061 | 0 | Neuron |
| Apex2 | Apex2 | 0 | 0.521402927 | 0.64 | 0.171 | 0 | Neuron |
| Inpp4a | Inpp4a | 0 | 0.521049848 | 0.655 | 0.169 | 0 | Neuron |
| Gm16351 | Gm16351 | 0 | 0.519736637 | 0.422 | 0.058 | 0 | Neuron |
| Ica1l | Ica1l | 0 | 0.518037817 | 0.455 | 0.065 | 0 | Neuron |
| Lmtk2 | Lmtk2 | 0 | 0.51604032 | 0.716 | 0.22 | 0 | Neuron |
| Ccdc30 | Ccdc30 | 0 | 0.5156348 | 0.598 | 0.115 | 0 | Neuron |
| Scmh1 | Scmh1 | 0 | 0.515440686 | 0.918 | 0.442 | 0 | Neuron |
| Pde4dip | Pde4dip | 0 | 0.515329192 | 0.94 | 0.424 | 0 | Neuron |
| Rab40b | Rab40b | 0 | 0.515060424 | 0.528 | 0.11 | 0 | Neuron |
| Gm38413 | Gm38413 | 0 | 0.51324232 | 0.354 | 0.027 | 0 | Neuron |
| Slc6a17 | Slc6a17 | 0 | 0.51037616 | 0.523 | 0.095 | 0 | Neuron |
| Pacs1 | Pacs1 | 0 | 0.508439872 | 0.788 | 0.257 | 0 | Neuron |
| Gm48677 | Gm48677 | 0 | 0.507751096 | 0.346 | 0.034 | 0 | Neuron |
| Myh10 | Myh10 | 0 | 0.505747263 | 0.676 | 0.187 | 0 | Neuron |
| Nexn | Nexn | 0 | 0.505129985 | 0.485 | 0.111 | 0 | Neuron |
| Gnb5 | Gnb5 | 0 | 0.504756482 | 0.633 | 0.169 | 0 | Neuron |
| Gm20754 | Gm20754 | 0 | 0.503685212 | 0.575 | 0.19 | 0 | Neuron |
| Gm13944 | Gm13944 | 0 | 0.50280892 | 0.357 | 0.034 | 0 | Neuron |
| Patj | Patj | 0 | 0.502273784 | 0.425 | 0.077 | 0 | Neuron |
| Cdkl5 | Cdkl5 | 0 | 0.50205585 | 0.793 | 0.298 | 0 | Neuron |
| D130043K22Rik | D130043K22Rik | 0 | 0.50188012 | 0.396 | 0.052 | 0 | Neuron |
| Shisa7 | Shisa7 | 0 | 0.501693722 | 0.487 | 0.083 | 0 | Neuron |
| Mcf2l | Mcf2l | 0 | 0.501082991 | 0.602 | 0.134 | 0 | Neuron |
| Cacna2d2 | Cacna2d2 | 0 | 0.500297136 | 0.477 | 0.106 | 0 | Neuron |
| Ppip5k1 | Ppip5k1 | 0 | 0.500183032 | 0.662 | 0.18 | 0 | Neuron |
| Slc8a3 | Slc8a3 | 0 | 0.499871655 | 0.708 | 0.218 | 0 | Neuron |
| Nexmif | Nexmif | 0 | 0.498450747 | 0.493 | 0.11 | 0 | Neuron |
| Trio | Trio | 0 | 0.498097927 | 0.9 | 0.363 | 0 | Neuron |
| Cabp1 | Cabp1 | 0 | 0.497917388 | 0.37 | 0.042 | 0 | Neuron |
| Gmcl1 | Gmcl1 | 0 | 0.497714893 | 0.693 | 0.203 | 0 | Neuron |
| Rhobtb2 | Rhobtb2 | 0 | 0.497204954 | 0.585 | 0.146 | 0 | Neuron |
| Far2 | Far2 | 0 | 0.496771078 | 0.445 | 0.07 | 0 | Neuron |
| Mkl1 | Mkl1 | 0 | 0.49600183 | 0.768 | 0.248 | 0 | Neuron |
| Eml6 | Eml6 | 0 | 0.493313378 | 0.902 | 0.422 | 0 | Neuron |
| Nos1ap | Nos1ap | 0 | 0.492390781 | 0.741 | 0.254 | 0 | Neuron |
| Phc2 | Phc2 | 0 | 0.492298671 | 0.795 | 0.282 | 0 | Neuron |
| Glp2r | Glp2r | 0 | 0.492092688 | 0.659 | 0.183 | 0 | Neuron |
| Filip1 | Filip1 | 0 | 0.490719542 | 0.418 | 0.066 | 0 | Neuron |
| 1700109K24Rik | 1700109K24Rik | 0 | 0.489796638 | 0.406 | 0.054 | 0 | Neuron |
| Pitpnm2 | Pitpnm2 | 0 | 0.489411998 | 0.648 | 0.188 | 0 | Neuron |
| Gsdme | Gsdme | 0 | 0.487377989 | 0.617 | 0.163 | 0 | Neuron |
| Mir124a-1hg | Mir124a-1hg | 0 | 0.486976927 | 0.568 | 0.121 | 0 | Neuron |
| Dmxl2 | Dmxl2 | 0 | 0.484834002 | 0.763 | 0.246 | 0 | Neuron |
| Tgfbr3 | Tgfbr3 | 0 | 0.483550409 | 0.442 | 0.08 | 0 | Neuron |
| Iqsec2 | Iqsec2 | 0 | 0.482394677 | 0.689 | 0.201 | 0 | Neuron |
| Cobl | Cobl | 0 | 0.480016283 | 0.695 | 0.216 | 0 | Neuron |
| Kcnt1 | Kcnt1 | 0 | 0.479971279 | 0.516 | 0.093 | 0 | Neuron |
| Pkia | Pkia | 0 | 0.478586043 | 0.768 | 0.255 | 0 | Neuron |
| Rapgef4os1 | Rapgef4os1 | 0 | 0.477553978 | 0.31 | 0.027 | 0 | Neuron |
| Adamts17 | Adamts17 | 0 | 0.477056704 | 0.299 | 0.039 | 0 | Neuron |
| Zdhhc2 | Zdhhc2 | 0 | 0.47699881 | 0.573 | 0.155 | 0 | Neuron |
| Sergef | Sergef | 0 | 0.475197934 | 0.55 | 0.137 | 0 | Neuron |
| 11-Mar | 11-Mar | 0 | 0.474888658 | 0.335 | 0.039 | 0 | Neuron |
| Mgat5b | Mgat5b | 0 | 0.473513365 | 0.5 | 0.099 | 0 | Neuron |
| Nova2 | Nova2 | 0 | 0.472879712 | 0.559 | 0.128 | 0 | Neuron |
| Ccdc148 | Ccdc148 | 0 | 0.472585727 | 0.599 | 0.143 | 0 | Neuron |
| Celf3 | Celf3 | 0 | 0.471919816 | 0.528 | 0.106 | 0 | Neuron |
| P2ry14 | P2ry14 | 0 | 0.470281639 | 0.526 | 0.128 | 0 | Neuron |
| Speg | Speg | 0 | 0.468959942 | 0.443 | 0.071 | 0 | Neuron |
| Gm15414 | Gm15414 | 0 | 0.468569729 | 0.312 | 0.026 | 0 | Neuron |
| Wasf1 | Wasf1 | 0 | 0.46574959 | 0.742 | 0.256 | 0 | Neuron |
| Akap6 | Akap6 | 0 | 0.465069153 | 0.99 | 0.684 | 0 | Neuron |
| Gm32250 | Gm32250 | 0 | 0.462767979 | 0.488 | 0.095 | 0 | Neuron |
| Tnik | Tnik | 0 | 0.459896869 | 0.982 | 0.578 | 0 | Neuron |
| Sptbn2 | Sptbn2 | 0 | 0.457918685 | 0.485 | 0.089 | 0 | Neuron |
| Cyfip2 | Cyfip2 | 0 | 0.45767207 | 0.744 | 0.233 | 0 | Neuron |
| Lsamp | Lsamp | 0 | 0.456768539 | 1 | 0.926 | 0 | Neuron |
| Diaph2 | Diaph2 | 0 | 0.456583376 | 0.929 | 0.54 | 0 | Neuron |
| Gm21954 | Gm21954 | 0 | 0.455989137 | 0.466 | 0.093 | 0 | Neuron |
| Mical3 | Mical3 | 0 | 0.45598487 | 0.884 | 0.369 | 0 | Neuron |
| 4933412O06Rik | 4933412O06Rik | 0 | 0.455488306 | 0.309 | 0.026 | 0 | Neuron |
| Gm1604b | Gm1604b | 0 | 0.455158696 | 0.303 | 0.028 | 0 | Neuron |
| Dnm1 | Dnm1 | 0 | 0.455076137 | 0.671 | 0.179 | 0 | Neuron |
| Bend6 | Bend6 | 0 | 0.453376237 | 0.394 | 0.075 | 0 | Neuron |
| Clip4 | Clip4 | 0 | 0.452706283 | 0.616 | 0.165 | 0 | Neuron |
| Ablim3 | Ablim3 | 0 | 0.452667354 | 0.291 | 0.03 | 0 | Neuron |
| Frmd3 | Frmd3 | 0 | 0.451296981 | 0.4 | 0.08 | 0 | Neuron |
| Kcnd3 | Kcnd3 | 0 | 0.450343297 | 0.555 | 0.17 | 0 | Neuron |
| Gm48893 | Gm48893 | 0 | 0.450134758 | 0.296 | 0.022 | 0 | Neuron |
| Gm48749 | Gm48749 | 0 | 0.449270694 | 0.266 | 0.019 | 0 | Neuron |
| Crocc | Crocc | 0 | 0.4491501 | 0.473 | 0.09 | 0 | Neuron |
| Chchd6 | Chchd6 | 0 | 0.448252091 | 0.527 | 0.12 | 0 | Neuron |
| Syne1 | Syne1 | 0 | 0.447304851 | 0.982 | 0.553 | 0 | Neuron |
| Radil | Radil | 0 | 0.446185925 | 0.357 | 0.047 | 0 | Neuron |
| Ccdc85a | Ccdc85a | 0 | 0.442767806 | 0.61 | 0.204 | 0 | Neuron |
| Kcnh4 | Kcnh4 | 0 | 0.442044296 | 0.324 | 0.041 | 0 | Neuron |
| Tbc1d30 | Tbc1d30 | 0 | 0.437987443 | 0.369 | 0.055 | 0 | Neuron |
| 4930428E07Rik | 4930428E07Rik | 0 | 0.435378478 | 0.319 | 0.043 | 0 | Neuron |
| Grm4 | Grm4 | 0 | 0.43435296 | 0.371 | 0.055 | 0 | Neuron |
| Gm11817 | Gm11817 | 0 | 0.433799047 | 0.275 | 0.023 | 0 | Neuron |
| Gm42456 | Gm42456 | 0 | 0.433024942 | 0.322 | 0.031 | 0 | Neuron |
| Fndc1 | Fndc1 | 0 | 0.43277933 | 0.273 | 0.026 | 0 | Neuron |
| Car12 | Car12 | 0 | 0.432284897 | 0.315 | 0.043 | 0 | Neuron |
| Gucy1b1 | Gucy1b1 | 0 | 0.431202269 | 0.602 | 0.171 | 0 | Neuron |
| Vstm2a | Vstm2a | 0 | 0.430932117 | 0.462 | 0.116 | 0 | Neuron |
| Lgi1 | Lgi1 | 0 | 0.430458496 | 0.651 | 0.193 | 0 | Neuron |
| Adar | Adar | 0 | 0.430277412 | 0.646 | 0.183 | 0 | Neuron |
| Mme | Mme | 0 | 0.429750674 | 0.302 | 0.044 | 0 | Neuron |
| Cacng8 | Cacng8 | 0 | 0.426938047 | 0.462 | 0.091 | 0 | Neuron |
| Gucy1a1 | Gucy1a1 | 0 | 0.426386106 | 0.469 | 0.122 | 0 | Neuron |
| Abat | Abat | 0 | 0.426010801 | 0.787 | 0.297 | 0 | Neuron |
| Pknox2 | Pknox2 | 0 | 0.422644777 | 0.611 | 0.179 | 0 | Neuron |
| Fbxl2 | Fbxl2 | 0 | 0.42236472 | 0.587 | 0.149 | 0 | Neuron |
| C2cd2 | C2cd2 | 0 | 0.422349074 | 0.401 | 0.087 | 0 | Neuron |
| Garnl3 | Garnl3 | 0 | 0.420820618 | 0.546 | 0.163 | 0 | Neuron |
| Fam78b | Fam78b | 0 | 0.418478267 | 0.458 | 0.086 | 0 | Neuron |
| Gpr63 | Gpr63 | 0 | 0.417070539 | 0.359 | 0.064 | 0 | Neuron |
| Cep126 | Cep126 | 0 | 0.416582827 | 0.54 | 0.125 | 0 | Neuron |
| Dlgap4 | Dlgap4 | 0 | 0.415860102 | 0.768 | 0.262 | 0 | Neuron |
| Casc4 | Casc4 | 0 | 0.415514341 | 0.727 | 0.252 | 0 | Neuron |
| Glce | Glce | 0 | 0.4149653 | 0.54 | 0.134 | 0 | Neuron |
| Dgkz | Dgkz | 0 | 0.412697915 | 0.513 | 0.126 | 0 | Neuron |
| Rxrg | Rxrg | 0 | 0.411019052 | 0.328 | 0.054 | 0 | Neuron |
| D430036J16Rik | D430036J16Rik | 0 | 0.41051035 | 0.291 | 0.031 | 0 | Neuron |
| Flrt3 | Flrt3 | 0 | 0.409094669 | 0.526 | 0.124 | 0 | Neuron |
| Mblac2 | Mblac2 | 0 | 0.409042922 | 0.543 | 0.13 | 0 | Neuron |
| Map6 | Map6 | 0 | 0.408440535 | 0.622 | 0.168 | 0 | Neuron |
| Gm44643 | Gm44643 | 0 | 0.406466742 | 0.286 | 0.025 | 0 | Neuron |
| Rapgef6 | Rapgef6 | 0 | 0.405580805 | 0.868 | 0.376 | 0 | Neuron |
| Med12l | Med12l | 0 | 0.405379003 | 0.804 | 0.318 | 0 | Neuron |
| Ngef | Ngef | 0 | 0.40439004 | 0.67 | 0.235 | 0 | Neuron |
| Kcnn3 | Kcnn3 | 0 | 0.404376174 | 0.592 | 0.165 | 0 | Neuron |
| Gm1992 | Gm1992 | 0 | 0.404335586 | 0.354 | 0.058 | 0 | Neuron |
| Uggt2 | Uggt2 | 0 | 0.403864199 | 0.591 | 0.172 | 0 | Neuron |
| Astn1 | Astn1 | 0 | 0.403863741 | 0.927 | 0.393 | 0 | Neuron |
| Dlg4 | Dlg4 | 0 | 0.403568907 | 0.559 | 0.144 | 0 | Neuron |
| Lrrn2 | Lrrn2 | 0 | 0.403478343 | 0.558 | 0.143 | 0 | Neuron |
| Gm38393 | Gm38393 | 0 | 0.403106384 | 0.699 | 0.219 | 0 | Neuron |
| Dtd1 | Dtd1 | 0 | 0.402484435 | 0.648 | 0.197 | 0 | Neuron |
| Cpne8 | Cpne8 | 0 | 0.402080368 | 0.438 | 0.119 | 0 | Neuron |
| Gprasp1 | Gprasp1 | 0 | 0.402023688 | 0.711 | 0.244 | 0 | Neuron |
| Gabra5 | Gabra5 | 0 | 0.401822283 | 0.316 | 0.048 | 0 | Neuron |
| Smim14 | Smim14 | 0 | 0.400936775 | 0.371 | 0.061 | 0 | Neuron |
| Ppp1r1a | Ppp1r1a | 0 | 0.400617391 | 0.35 | 0.052 | 0 | Neuron |
| Cxadr | Cxadr | 0 | 0.400199503 | 0.406 | 0.073 | 0 | Neuron |
| Zdbf2 | Zdbf2 | 0 | 0.399354246 | 0.397 | 0.089 | 0 | Neuron |
| Tmem181a | Tmem181a | 0 | 0.399095625 | 0.629 | 0.184 | 0 | Neuron |
| Rhbdl3 | Rhbdl3 | 0 | 0.39881688 | 0.429 | 0.104 | 0 | Neuron |
| Gm43376 | Gm43376 | 0 | 0.398697363 | 0.475 | 0.104 | 0 | Neuron |
| Ttc19 | Ttc19 | 0 | 0.398523479 | 0.767 | 0.272 | 0 | Neuron |
| Lyst | Lyst | 0 | 0.397431602 | 0.771 | 0.291 | 0 | Neuron |
| Dym | Dym | 0 | 0.396434939 | 0.763 | 0.282 | 0 | Neuron |
| Rgl1 | Rgl1 | 0 | 0.396414977 | 0.696 | 0.245 | 0 | Neuron |
| Rnf165 | Rnf165 | 0 | 0.392589712 | 0.478 | 0.099 | 0 | Neuron |
| Zswim5 | Zswim5 | 0 | 0.39188453 | 0.664 | 0.231 | 0 | Neuron |
| Uxs1 | Uxs1 | 0 | 0.391068672 | 0.523 | 0.124 | 0 | Neuron |
| Matk | Matk | 0 | 0.390268878 | 0.501 | 0.106 | 0 | Neuron |
| Ahcyl2 | Ahcyl2 | 0 | 0.388941345 | 0.857 | 0.364 | 0 | Neuron |
| Ctnna2 | Ctnna2 | 0 | 0.38768091 | 0.997 | 0.817 | 0 | Neuron |
| Slc6a15 | Slc6a15 | 0 | 0.387246626 | 0.358 | 0.066 | 0 | Neuron |
| Ccdc149 | Ccdc149 | 0 | 0.38681715 | 0.366 | 0.059 | 0 | Neuron |
| Plec | Plec | 0 | 0.386689012 | 0.412 | 0.078 | 0 | Neuron |
| Kcnip3 | Kcnip3 | 0 | 0.386500059 | 0.64 | 0.232 | 0 | Neuron |
| B830012L14Rik | B830012L14Rik | 0 | 0.386254319 | 0.295 | 0.027 | 0 | Neuron |
| Gm1976 | Gm1976 | 0 | 0.385902882 | 0.639 | 0.204 | 0 | Neuron |
| Kcna4 | Kcna4 | 0 | 0.385661279 | 0.439 | 0.091 | 0 | Neuron |
| Ctdspl | Ctdspl | 0 | 0.384498105 | 0.728 | 0.257 | 0 | Neuron |
| Lingo1 | Lingo1 | 0 | 0.382882904 | 0.415 | 0.076 | 0 | Neuron |
| Pgbd5 | Pgbd5 | 0 | 0.381317204 | 0.483 | 0.104 | 0 | Neuron |
| Rnf207 | Rnf207 | 0 | 0.377561508 | 0.275 | 0.026 | 0 | Neuron |
| Sgsm2 | Sgsm2 | 0 | 0.377380672 | 0.471 | 0.107 | 0 | Neuron |
| Ppp2r2c | Ppp2r2c | 0 | 0.375318427 | 0.656 | 0.194 | 0 | Neuron |
| Bzw2 | Bzw2 | 0 | 0.3742309 | 0.52 | 0.138 | 0 | Neuron |
| Ncoa7 | Ncoa7 | 0 | 0.372387628 | 0.699 | 0.24 | 0 | Neuron |
| Fndc3b | Fndc3b | 0 | 0.371938162 | 0.684 | 0.232 | 0 | Neuron |
| Nedd4l | Nedd4l | 0 | 0.371841235 | 0.94 | 0.505 | 0 | Neuron |
| St6gal2 | St6gal2 | 0 | 0.371369411 | 0.366 | 0.066 | 0 | Neuron |
| Csnk1g1 | Csnk1g1 | 0 | 0.369328434 | 0.81 | 0.331 | 0 | Neuron |
| Sh3pxd2a | Sh3pxd2a | 0 | 0.36916985 | 0.451 | 0.087 | 0 | Neuron |
| Gap43 | Gap43 | 0 | 0.369090221 | 0.692 | 0.236 | 0 | Neuron |
| Tasp1 | Tasp1 | 0 | 0.367670901 | 0.699 | 0.233 | 0 | Neuron |
| Gm40841 | Gm40841 | 0 | 0.36724119 | 0.386 | 0.08 | 0 | Neuron |
| Camkv | Camkv | 0 | 0.366386947 | 0.653 | 0.204 | 0 | Neuron |
| Stk26 | Stk26 | 0 | 0.366050356 | 0.316 | 0.043 | 0 | Neuron |
| Slc4a3 | Slc4a3 | 0 | 0.365573359 | 0.495 | 0.113 | 0 | Neuron |
| Tro | Tro | 0 | 0.365458675 | 0.392 | 0.076 | 0 | Neuron |
| Dpy19l3 | Dpy19l3 | 0 | 0.36450931 | 0.407 | 0.094 | 0 | Neuron |
| Bhlhb9 | Bhlhb9 | 0 | 0.361424533 | 0.458 | 0.108 | 0 | Neuron |
| Ppp1r13b | Ppp1r13b | 0 | 0.361138362 | 0.643 | 0.194 | 0 | Neuron |
| Slc6a6 | Slc6a6 | 0 | 0.360535714 | 0.843 | 0.353 | 0 | Neuron |
| Dph6 | Dph6 | 0 | 0.360073697 | 0.614 | 0.194 | 0 | Neuron |
| Ttc7b | Ttc7b | 0 | 0.359755767 | 0.779 | 0.306 | 0 | Neuron |
| Rasgrp2 | Rasgrp2 | 0 | 0.358846182 | 0.393 | 0.078 | 0 | Neuron |
| Shc3 | Shc3 | 0 | 0.358482471 | 0.609 | 0.192 | 0 | Neuron |
| 11-Sep | 11-Sep | 0 | 0.358339694 | 0.625 | 0.178 | 0 | Neuron |
| Fam126b | Fam126b | 0 | 0.356001382 | 0.709 | 0.249 | 0 | Neuron |
| Brinp2 | Brinp2 | 0 | 0.355476967 | 0.491 | 0.13 | 0 | Neuron |
| Mprip | Mprip | 0 | 0.355399065 | 0.815 | 0.334 | 0 | Neuron |
| Fam69a | Fam69a | 0 | 0.354859658 | 0.493 | 0.121 | 0 | Neuron |
| Lmtk3 | Lmtk3 | 0 | 0.354104306 | 0.471 | 0.104 | 0 | Neuron |
| D630045J12Rik | D630045J12Rik | 0 | 0.351228244 | 0.568 | 0.151 | 0 | Neuron |
| Gm10419 | Gm10419 | 0 | 0.350913078 | 0.448 | 0.094 | 0 | Neuron |
| Igsf9b | Igsf9b | 0 | 0.35054154 | 0.424 | 0.092 | 0 | Neuron |
| Lrrc49 | Lrrc49 | 0 | 0.34787739 | 0.7 | 0.248 | 0 | Neuron |
| Fntb | Fntb | 0 | 0.347356103 | 0.477 | 0.118 | 0 | Neuron |
| Stxbp1 | Stxbp1 | 0 | 0.346640658 | 0.742 | 0.254 | 0 | Neuron |
| Pgr | Pgr | 0 | 0.345898086 | 0.3 | 0.041 | 0 | Neuron |
| Pkd1 | Pkd1 | 0 | 0.344945241 | 0.661 | 0.215 | 0 | Neuron |
| Agap2 | Agap2 | 0 | 0.343679384 | 0.351 | 0.059 | 0 | Neuron |
| Actl6b | Actl6b | 0 | 0.343540663 | 0.358 | 0.058 | 0 | Neuron |
| Pfkp | Pfkp | 0 | 0.341721858 | 0.563 | 0.16 | 0 | Neuron |
| Otud7a | Otud7a | 0 | 0.340970701 | 0.923 | 0.428 | 0 | Neuron |
| Fbxo41 | Fbxo41 | 0 | 0.339268555 | 0.386 | 0.071 | 0 | Neuron |
| Spats2l | Spats2l | 0 | 0.338883654 | 0.428 | 0.108 | 0 | Neuron |
| Gabrd | Gabrd | 0 | 0.33862128 | 0.416 | 0.092 | 0 | Neuron |
| Erlin1 | Erlin1 | 0 | 0.337863939 | 0.442 | 0.107 | 0 | Neuron |
| Rnf157 | Rnf157 | 0 | 0.337279629 | 0.651 | 0.214 | 0 | Neuron |
| Myo1b | Myo1b | 0 | 0.336221025 | 0.524 | 0.128 | 0 | Neuron |
| Ptprn | Ptprn | 0 | 0.334998688 | 0.723 | 0.252 | 0 | Neuron |
| A230057D06Rik.2 | A230057D06Rik.2 | 0 | 0.334788338 | 0.544 | 0.158 | 0 | Neuron |
| Adgrb1 | Adgrb1 | 0 | 0.334262753 | 0.668 | 0.231 | 0 | Neuron |
| Rbm24 | Rbm24 | 0 | 0.332311108 | 0.338 | 0.063 | 0 | Neuron |
| Tmem191c | Tmem191c | 0 | 0.332196389 | 0.4 | 0.08 | 0 | Neuron |
| Prelid3a | Prelid3a | 0 | 0.332044348 | 0.511 | 0.135 | 0 | Neuron |
| Ccdc57 | Ccdc57 | 0 | 0.323859583 | 0.486 | 0.128 | 0 | Neuron |
| A930015D03Rik | A930015D03Rik | 0 | 0.322604357 | 0.711 | 0.252 | 0 | Neuron |
| Rab15 | Rab15 | 0 | 0.322472028 | 0.377 | 0.067 | 0 | Neuron |
| 9330182L06Rik | 9330182L06Rik | 0 | 0.322282208 | 0.665 | 0.214 | 0 | Neuron |
| Mcph1 | Mcph1 | 0 | 0.32222103 | 0.486 | 0.124 | 0 | Neuron |
| Cdc14b | Cdc14b | 0 | 0.321859497 | 0.476 | 0.135 | 0 | Neuron |
| Cers4 | Cers4 | 0 | 0.319840527 | 0.424 | 0.106 | 0 | Neuron |
| Necab2 | Necab2 | 0 | 0.315719134 | 0.415 | 0.094 | 0 | Neuron |
| Jcad | Jcad | 0 | 0.315409339 | 0.448 | 0.113 | 0 | Neuron |
| Nipsnap1 | Nipsnap1 | 0 | 0.312796051 | 0.401 | 0.082 | 0 | Neuron |
| Crtc1 | Crtc1 | 0 | 0.311067407 | 0.488 | 0.127 | 0 | Neuron |
| Arhgap33 | Arhgap33 | 0 | 0.311054279 | 0.445 | 0.107 | 0 | Neuron |
| Rasgrp1 | Rasgrp1 | 0 | 0.310872301 | 0.637 | 0.219 | 0 | Neuron |
| Dbn1 | Dbn1 | 0 | 0.309296211 | 0.491 | 0.121 | 0 | Neuron |
| Dock7 | Dock7 | 0 | 0.306776565 | 0.738 | 0.262 | 0 | Neuron |
| Gm17227 | Gm17227 | 0 | 0.305679855 | 0.398 | 0.086 | 0 | Neuron |
| Setd4 | Setd4 | 0 | 0.303290835 | 0.354 | 0.068 | 0 | Neuron |
| Lzts3 | Lzts3 | 0 | 0.300944711 | 0.491 | 0.131 | 0 | Neuron |
| S100pbp | S100pbp | 0 | 0.29713249 | 0.599 | 0.196 | 0 | Neuron |
| Itpka | Itpka | 0 | 0.296513784 | 0.391 | 0.086 | 0 | Neuron |
| Lonrf2 | Lonrf2 | 0 | 0.295028255 | 0.439 | 0.103 | 0 | Neuron |
| Ttc8 | Ttc8 | 0 | 0.294601966 | 0.651 | 0.219 | 0 | Neuron |
| Madd | Madd | 0 | 0.292094568 | 0.472 | 0.115 | 0 | Neuron |
| Mok | Mok | 0 | 0.291439989 | 0.407 | 0.093 | 0 | Neuron |
| Nmt2 | Nmt2 | 0 | 0.289809621 | 0.574 | 0.174 | 0 | Neuron |
| Hdx | Hdx | 0 | 0.285540838 | 0.421 | 0.103 | 0 | Neuron |
| Scn3b | Scn3b | 0 | 0.28463068 | 0.444 | 0.108 | 0 | Neuron |
| Kifc2 | Kifc2 | 0 | 0.284233343 | 0.366 | 0.073 | 0 | Neuron |
| Slc8a2 | Slc8a2 | 0 | 0.283889526 | 0.411 | 0.094 | 0 | Neuron |
| Slc24a5 | Slc24a5 | 0 | 0.273731674 | 0.45 | 0.119 | 0 | Neuron |
| Atxn7l1 | Atxn7l1 | 0 | 0.272278897 | 0.713 | 0.263 | 0 | Neuron |
| Hace1 | Hace1 | 0 | 0.271827015 | 0.685 | 0.249 | 0 | Neuron |
| Atcay | Atcay | 0 | 0.265230348 | 0.475 | 0.124 | 0 | Neuron |
| Jph4 | Jph4 | 0 | 0.265003408 | 0.603 | 0.185 | 0 | Neuron |
| Mdn1 | Mdn1 | 0 | 0.263524799 | 0.536 | 0.16 | 0 | Neuron |
| Slc1a1 | Slc1a1 | 0 | 0.261662467 | 0.522 | 0.149 | 0 | Neuron |
| Arhgef7 | Arhgef7 | 0 | 0.25619875 | 0.589 | 0.193 | 0 | Neuron |
| Prkar1b | Prkar1b | 0 | 0.253613974 | 0.535 | 0.157 | 0 | Neuron |
| St7 | St7 | 4.53E-308 | 0.250036065 | 0.665 | 0.239 | 1.03E-303 | Neuron |
| Palm | Palm | 4.78E-308 | 0.258545587 | 0.476 | 0.134 | 1.09E-303 | Neuron |
| Sclt1 | Sclt1 | 5.37E-307 | 0.329205041 | 0.757 | 0.299 | 1.22E-302 | Neuron |
| Map2k4 | Map2k4 | 6.06E-307 | 0.299780681 | 0.749 | 0.291 | 1.38E-302 | Neuron |
| Vps13a | Vps13a | 1.27E-306 | 0.30593844 | 0.695 | 0.26 | 2.88E-302 | Neuron |
| Abi2 | Abi2 | 1.39E-306 | 0.391953084 | 0.863 | 0.384 | 3.16E-302 | Neuron |
| Cstf2 | Cstf2 | 2.05E-306 | 0.2792668 | 0.378 | 0.084 | 4.66E-302 | Neuron |
| Gm13883 | Gm13883 | 3.13E-306 | 0.384028538 | 0.265 | 0.029 | 7.12E-302 | Neuron |
| Dhx32 | Dhx32 | 5.44E-305 | 0.258852492 | 0.458 | 0.127 | 1.24E-300 | Neuron |
| Uhrf1bp1l | Uhrf1bp1l | 5.60E-305 | 0.250092594 | 0.499 | 0.148 | 1.27E-300 | Neuron |
| Ocrl | Ocrl | 2.09E-304 | 0.269032363 | 0.677 | 0.246 | 4.75E-300 | Neuron |
| Slc7a6 | Slc7a6 | 2.61E-304 | 0.276342645 | 0.412 | 0.102 | 5.93E-300 | Neuron |
| Cplx2 | Cplx2 | 3.23E-304 | 0.260921257 | 0.573 | 0.187 | 7.33E-300 | Neuron |
| Gm15336 | Gm15336 | 4.50E-304 | 0.378659844 | 0.274 | 0.033 | 1.02E-299 | Neuron |
| Spred2 | Spred2 | 4.17E-303 | 0.327303518 | 0.634 | 0.229 | 9.48E-299 | Neuron |
| Aak1 | Aak1 | 1.64E-302 | 0.426120957 | 0.922 | 0.444 | 3.73E-298 | Neuron |
| Mtf2 | Mtf2 | 2.12E-302 | 0.253616183 | 0.689 | 0.252 | 4.81E-298 | Neuron |
| Pak6 | Pak6 | 3.36E-302 | 0.333779941 | 0.278 | 0.036 | 7.64E-298 | Neuron |
| Cdkl2 | Cdkl2 | 8.11E-302 | 0.306567895 | 0.308 | 0.05 | 1.84E-297 | Neuron |
| Drd2 | Drd2 | 1.56E-301 | 0.832259886 | 0.377 | 0.097 | 3.55E-297 | Neuron |
| 4930445B16Rik | 4930445B16Rik | 1.81E-301 | 0.387258556 | 0.335 | 0.064 | 4.10E-297 | Neuron |
| E430024P14Rik | E430024P14Rik | 3.16E-301 | 0.346448688 | 0.323 | 0.058 | 7.17E-297 | Neuron |
| Acvr2a | Acvr2a | 6.61E-301 | 0.332131942 | 0.517 | 0.163 | 1.50E-296 | Neuron |
| Grik3 | Grik3 | 1.90E-300 | 0.540806276 | 0.441 | 0.13 | 4.31E-296 | Neuron |
| 4930415C11Rik | 4930415C11Rik | 2.61E-300 | 0.390486818 | 0.286 | 0.04 | 5.93E-296 | Neuron |
| Sez6 | Sez6 | 3.33E-300 | 0.376901176 | 0.722 | 0.291 | 7.56E-296 | Neuron |
| Naa40 | Naa40 | 1.85E-299 | 0.258173855 | 0.527 | 0.165 | 4.20E-295 | Neuron |
| Spink10 | Spink10 | 5.75E-299 | 0.346304813 | 0.305 | 0.049 | 1.31E-294 | Neuron |
| Pitpnm3 | Pitpnm3 | 8.43E-299 | 0.381085331 | 0.31 | 0.052 | 1.91E-294 | Neuron |
| Man1a | Man1a | 4.44E-298 | 0.485355259 | 0.742 | 0.335 | 1.01E-293 | Neuron |
| Dnmbp | Dnmbp | 8.04E-298 | 0.27908427 | 0.419 | 0.108 | 1.83E-293 | Neuron |
| Fut9 | Fut9 | 8.31E-298 | 0.383124779 | 0.875 | 0.413 | 1.89E-293 | Neuron |
| Gm43192 | Gm43192 | 2.43E-296 | 0.371961309 | 0.26 | 0.029 | 5.53E-292 | Neuron |
| Acp1 | Acp1 | 2.67E-296 | 0.267722952 | 0.444 | 0.121 | 6.07E-292 | Neuron |
| Gm16183 | Gm16183 | 4.28E-296 | 0.338650747 | 0.259 | 0.028 | 9.73E-292 | Neuron |
| Pcgf5 | Pcgf5 | 1.19E-295 | 0.253021923 | 0.588 | 0.201 | 2.70E-291 | Neuron |
| Cdk17 | Cdk17 | 3.39E-295 | 0.469764209 | 0.896 | 0.459 | 7.70E-291 | Neuron |
| Dagla | Dagla | 3.51E-294 | 0.260038018 | 0.37 | 0.082 | 7.98E-290 | Neuron |
| Prdm10 | Prdm10 | 9.80E-294 | 0.250097715 | 0.5 | 0.153 | 2.23E-289 | Neuron |
| Agfg2 | Agfg2 | 3.07E-293 | 0.260883405 | 0.424 | 0.112 | 6.97E-289 | Neuron |
| Adam22 | Adam22 | 1.21E-292 | 0.409732197 | 0.9 | 0.425 | 2.75E-288 | Neuron |
| Pou6f2 | Pou6f2 | 1.88E-292 | 0.584263487 | 0.258 | 0.03 | 4.27E-288 | Neuron |
| Nphp4 | Nphp4 | 1.37E-291 | 0.3129627 | 0.296 | 0.048 | 3.11E-287 | Neuron |
| Shank1 | Shank1 | 1.68E-290 | 0.384994642 | 0.301 | 0.05 | 3.81E-286 | Neuron |
| Prr16 | Prr16 | 2.56E-290 | 0.574158341 | 0.469 | 0.15 | 5.81E-286 | Neuron |
| Stxbp5 | Stxbp5 | 3.26E-290 | 0.292832407 | 0.747 | 0.296 | 7.39E-286 | Neuron |
| Ankrd45 | Ankrd45 | 4.58E-290 | 0.298634751 | 0.33 | 0.064 | 1.04E-285 | Neuron |
| Fam171a1 | Fam171a1 | 7.17E-290 | 0.2724915 | 0.66 | 0.243 | 1.63E-285 | Neuron |
| Cacna1h | Cacna1h | 2.72E-289 | 0.298435611 | 0.284 | 0.041 | 6.18E-285 | Neuron |
| Gm48321 | Gm48321 | 6.43E-289 | 0.350136296 | 0.301 | 0.051 | 1.46E-284 | Neuron |
| Tesc | Tesc | 6.94E-289 | 0.252702878 | 0.382 | 0.09 | 1.58E-284 | Neuron |
| Peg3 | Peg3 | 9.74E-289 | 0.337242868 | 0.755 | 0.311 | 2.21E-284 | Neuron |
| Iqsec3 | Iqsec3 | 5.90E-288 | 0.437684173 | 0.25 | 0.026 | 1.34E-283 | Neuron |
| Atf6 | Atf6 | 9.65E-288 | 0.320622565 | 0.722 | 0.287 | 2.19E-283 | Neuron |
| Gulp1 | Gulp1 | 6.42E-286 | 0.530654036 | 0.533 | 0.192 | 1.46E-281 | Neuron |
| 2410089E03Rik | 2410089E03Rik | 2.86E-285 | 0.333697415 | 0.813 | 0.346 | 6.50E-281 | Neuron |
| Galnt14 | Galnt14 | 4.11E-285 | 0.581490325 | 0.28 | 0.043 | 9.35E-281 | Neuron |
| Hectd4 | Hectd4 | 5.25E-285 | 0.287595591 | 0.794 | 0.325 | 1.19E-280 | Neuron |
| Plekhg5 | Plekhg5 | 1.10E-284 | 0.28818695 | 0.325 | 0.064 | 2.50E-280 | Neuron |
| Zfat | Zfat | 4.89E-284 | 0.268687252 | 0.367 | 0.085 | 1.11E-279 | Neuron |
| Rgs11 | Rgs11 | 5.83E-284 | 0.305416626 | 0.276 | 0.041 | 1.32E-279 | Neuron |
| Arhgef3 | Arhgef3 | 5.88E-284 | 0.28719633 | 0.406 | 0.106 | 1.34E-279 | Neuron |
| Kcnh3 | Kcnh3 | 1.01E-283 | 0.31146551 | 0.285 | 0.045 | 2.30E-279 | Neuron |
| Scai | Scai | 1.28E-283 | 0.281623308 | 0.756 | 0.304 | 2.91E-279 | Neuron |
| Gls | Gls | 3.03E-283 | 0.399434937 | 0.907 | 0.443 | 6.88E-279 | Neuron |
| Usp28 | Usp28 | 3.03E-283 | 0.278985584 | 0.431 | 0.12 | 6.89E-279 | Neuron |
| Itgbl1 | Itgbl1 | 8.29E-282 | 0.353344058 | 0.259 | 0.032 | 1.88E-277 | Neuron |
| Ptpro | Ptpro | 7.48E-281 | 0.250795401 | 0.49 | 0.154 | 1.70E-276 | Neuron |
| Rgs8 | Rgs8 | 2.53E-280 | 0.261507645 | 0.357 | 0.081 | 5.75E-276 | Neuron |
| Slc16a2 | Slc16a2 | 6.21E-280 | 0.285278676 | 0.431 | 0.12 | 1.41E-275 | Neuron |
| Cxxc4 | Cxxc4 | 4.47E-279 | 0.258808405 | 0.369 | 0.087 | 1.02E-274 | Neuron |
| Pam | Pam | 9.23E-279 | 0.460142552 | 0.844 | 0.406 | 2.10E-274 | Neuron |
| Gm38251 | Gm38251 | 3.82E-278 | 0.329151107 | 0.266 | 0.036 | 8.67E-274 | Neuron |
| Gm15577 | Gm15577 | 1.45E-277 | 0.316254679 | 0.295 | 0.051 | 3.29E-273 | Neuron |
| Akap17b | Akap17b | 1.87E-277 | 0.254782158 | 0.38 | 0.094 | 4.26E-273 | Neuron |
| Ralyl | Ralyl | 5.53E-274 | 0.797067273 | 0.813 | 0.424 | 1.25E-269 | Neuron |
| Slc4a4 | Slc4a4 | 2.49E-271 | 0.304096424 | 0.852 | 0.506 | 5.66E-267 | Neuron |
| Shc2 | Shc2 | 4.35E-270 | 0.289925807 | 0.25 | 0.031 | 9.87E-266 | Neuron |
| Tcaf1 | Tcaf1 | 7.31E-270 | 0.330304301 | 0.799 | 0.346 | 1.66E-265 | Neuron |
| Mpp7 | Mpp7 | 7.72E-270 | 0.32310292 | 0.48 | 0.155 | 1.75E-265 | Neuron |
| Faxc | Faxc | 5.94E-268 | 0.267301274 | 0.316 | 0.064 | 1.35E-263 | Neuron |
| Doc2b | Doc2b | 2.92E-267 | 0.2898519 | 0.258 | 0.035 | 6.62E-263 | Neuron |
| Inhba | Inhba | 1.14E-266 | 0.285792471 | 0.265 | 0.039 | 2.58E-262 | Neuron |
| Iqsec1 | Iqsec1 | 2.12E-266 | 0.318459164 | 0.829 | 0.376 | 4.81E-262 | Neuron |
| Pifo | Pifo | 2.63E-265 | 0.331941418 | 0.255 | 0.036 | 5.97E-261 | Neuron |
| Mmp17 | Mmp17 | 6.88E-265 | 0.254847809 | 0.298 | 0.056 | 1.56E-260 | Neuron |
| Sptan1 | Sptan1 | 1.18E-263 | 0.29055778 | 0.795 | 0.335 | 2.68E-259 | Neuron |
| Gramd1b | Gramd1b | 1.22E-263 | 0.336041826 | 0.739 | 0.313 | 2.78E-259 | Neuron |
| Grm8 | Grm8 | 2.52E-263 | 0.942709527 | 0.365 | 0.104 | 5.72E-259 | Neuron |
| Ank1 | Ank1 | 1.94E-262 | 0.396228224 | 0.305 | 0.062 | 4.40E-258 | Neuron |
| Dync1i2 | Dync1i2 | 3.47E-261 | 0.282641343 | 0.824 | 0.358 | 7.89E-257 | Neuron |
| 4930587E11Rik | 4930587E11Rik | 3.62E-261 | 0.367705969 | 0.286 | 0.052 | 8.23E-257 | Neuron |
| Gm11099 | Gm11099 | 3.93E-261 | 0.334902085 | 0.255 | 0.037 | 8.94E-257 | Neuron |
| Sgk3 | Sgk3 | 4.64E-261 | 0.314899447 | 0.638 | 0.254 | 1.05E-256 | Neuron |
| Stx3 | Stx3 | 4.93E-261 | 0.266451973 | 0.28 | 0.048 | 1.12E-256 | Neuron |
| Sesn3 | Sesn3 | 1.47E-260 | 0.29286679 | 0.777 | 0.332 | 3.35E-256 | Neuron |
| Mmp24 | Mmp24 | 2.02E-259 | 0.284971499 | 0.25 | 0.034 | 4.58E-255 | Neuron |
| Tub | Tub | 3.20E-259 | 0.259552101 | 0.31 | 0.064 | 7.26E-255 | Neuron |
| Oprk1 | Oprk1 | 3.86E-259 | 0.306867928 | 0.294 | 0.056 | 8.76E-255 | Neuron |
| Nsun2 | Nsun2 | 1.30E-258 | 0.255599216 | 0.386 | 0.104 | 2.96E-254 | Neuron |
| Serpini1 | Serpini1 | 1.31E-258 | 0.32327903 | 0.372 | 0.098 | 2.98E-254 | Neuron |
| Mapk4 | Mapk4 | 1.57E-257 | 0.262203758 | 0.725 | 0.309 | 3.58E-253 | Neuron |
| Kcnt2 | Kcnt2 | 9.13E-257 | 0.627470864 | 0.361 | 0.099 | 2.07E-252 | Neuron |
| D030068K23Rik | D030068K23Rik | 7.95E-256 | 0.367028386 | 0.26 | 0.04 | 1.81E-251 | Neuron |
| Rph3a | Rph3a | 5.17E-254 | 0.313875992 | 0.283 | 0.052 | 1.17E-249 | Neuron |
| Tcf20 | Tcf20 | 8.37E-254 | 0.316763065 | 0.876 | 0.416 | 1.90E-249 | Neuron |
| Rasgrf2 | Rasgrf2 | 2.59E-253 | 0.372008945 | 0.264 | 0.043 | 5.89E-249 | Neuron |
| Epha4 | Epha4 | 1.43E-250 | 0.338001707 | 0.795 | 0.381 | 3.26E-246 | Neuron |
| Snx7 | Snx7 | 9.42E-249 | 0.264119778 | 0.324 | 0.075 | 2.14E-244 | Neuron |
| Klhdc10 | Klhdc10 | 1.14E-248 | 0.253528667 | 0.749 | 0.321 | 2.59E-244 | Neuron |
| Adam12 | Adam12 | 2.40E-248 | 0.342710147 | 0.384 | 0.111 | 5.46E-244 | Neuron |
| Cyld | Cyld | 2.68E-248 | 0.347027361 | 0.835 | 0.391 | 6.08E-244 | Neuron |
| Ubxn11 | Ubxn11 | 1.89E-247 | 0.259028801 | 0.307 | 0.067 | 4.29E-243 | Neuron |
| Ppp1r2 | Ppp1r2 | 1.52E-246 | 0.342365755 | 0.74 | 0.329 | 3.46E-242 | Neuron |
| Brinp3 | Brinp3 | 1.19E-245 | 0.337433176 | 0.691 | 0.338 | 2.70E-241 | Neuron |
| Dnmt3a | Dnmt3a | 1.02E-243 | 0.357292451 | 0.938 | 0.498 | 2.32E-239 | Neuron |
| Tle4 | Tle4 | 4.05E-242 | 0.344748078 | 0.762 | 0.352 | 9.19E-238 | Neuron |
| Epha3 | Epha3 | 1.00E-241 | 0.259557273 | 0.378 | 0.108 | 2.27E-237 | Neuron |
| Ndst3 | Ndst3 | 4.91E-241 | 0.435091183 | 0.291 | 0.062 | 1.11E-236 | Neuron |
| Gm48091 | Gm48091 | 1.42E-240 | 0.264403362 | 0.335 | 0.084 | 3.22E-236 | Neuron |
| Acvr1c | Acvr1c | 3.26E-238 | 0.29059964 | 0.344 | 0.09 | 7.41E-234 | Neuron |
| Lrp1b | Lrp1b | 4.13E-237 | 0.542785362 | 0.988 | 0.866 | 9.39E-233 | Neuron |
| Stum | Stum | 2.17E-236 | 0.25412426 | 0.26 | 0.046 | 4.93E-232 | Neuron |
| Ar | Ar | 4.72E-236 | 0.309287593 | 0.265 | 0.049 | 1.07E-231 | Neuron |
| Cadm2 | Cadm2 | 1.28E-234 | 0.407800465 | 0.997 | 0.929 | 2.91E-230 | Neuron |
| Greb1l | Greb1l | 9.36E-232 | 0.444886115 | 0.273 | 0.055 | 2.13E-227 | Neuron |
| Kcnj3 | Kcnj3 | 2.64E-230 | 0.466033377 | 0.383 | 0.121 | 5.99E-226 | Neuron |
| Ylpm1 | Ylpm1 | 1.01E-227 | 0.327933142 | 0.876 | 0.424 | 2.30E-223 | Neuron |
| Pcsk5 | Pcsk5 | 9.28E-223 | 0.394584678 | 0.252 | 0.047 | 2.11E-218 | Neuron |
| Gabra3 | Gabra3 | 1.25E-222 | 0.386123735 | 0.264 | 0.054 | 2.83E-218 | Neuron |
| Ebf1 | Ebf1 | 1.73E-222 | 0.344083355 | 0.346 | 0.105 | 3.93E-218 | Neuron |
| Cpeb3 | Cpeb3 | 1.83E-222 | 0.32863363 | 0.909 | 0.472 | 4.15E-218 | Neuron |
| Vsnl1 | Vsnl1 | 7.98E-222 | 0.557150413 | 0.399 | 0.138 | 1.81E-217 | Neuron |
| 1810034E14Rik | 1810034E14Rik | 1.16E-221 | 0.253370306 | 0.261 | 0.052 | 2.63E-217 | Neuron |
| AC149090.1 | AC149090.1 | 2.56E-219 | 0.30730753 | 0.515 | 0.201 | 5.83E-215 | Neuron |
| Strbp | Strbp | 7.90E-219 | 0.356436015 | 0.983 | 0.653 | 1.80E-214 | Neuron |
| Pard3 | Pard3 | 6.29E-218 | 0.406805438 | 0.927 | 0.609 | 1.43E-213 | Neuron |
| Tnrc6c | Tnrc6c | 1.34E-216 | 0.363893925 | 0.955 | 0.573 | 3.05E-212 | Neuron |
| Ildr2 | Ildr2 | 9.19E-216 | 0.285391703 | 0.387 | 0.123 | 2.09E-211 | Neuron |
| Btrc | Btrc | 1.65E-215 | 0.258333017 | 0.836 | 0.385 | 3.74E-211 | Neuron |
| Arhgap32 | Arhgap32 | 2.29E-212 | 0.344132382 | 0.895 | 0.469 | 5.19E-208 | Neuron |
| Gpc6 | Gpc6 | 1.68E-189 | 0.473138654 | 0.776 | 0.427 | 3.81E-185 | Neuron |
| Cep112 | Cep112 | 4.74E-182 | 0.417969872 | 0.446 | 0.182 | 1.08E-177 | Neuron |
| Pcdh17 | Pcdh17 | 4.48E-176 | 0.277205152 | 0.772 | 0.392 | 1.02E-171 | Neuron |
| Vps13b | Vps13b | 1.09E-175 | 0.301012956 | 0.943 | 0.553 | 2.48E-171 | Neuron |
| Thsd7b | Thsd7b | 2.27E-175 | 0.807514699 | 0.27 | 0.08 | 5.15E-171 | Neuron |
| Sorcs1 | Sorcs1 | 1.10E-171 | 0.350979099 | 0.868 | 0.526 | 2.49E-167 | Neuron |
| Il1rapl2 | Il1rapl2 | 1.01E-168 | 1.915140787 | 0.301 | 0.106 | 2.30E-164 | Neuron |
| Fbxl17 | Fbxl17 | 9.55E-167 | 0.269625225 | 0.959 | 0.599 | 2.17E-162 | Neuron |
| Mbd5 | Mbd5 | 1.60E-164 | 0.301645902 | 0.975 | 0.678 | 3.64E-160 | Neuron |
| Ptprd | Ptprd | 1.70E-163 | 0.35479475 | 0.988 | 0.901 | 3.87E-159 | Neuron |
| Mir670hg | Mir670hg | 3.49E-162 | 0.254719057 | 0.322 | 0.111 | 7.92E-158 | Neuron |
| Camta1 | Camta1 | 2.67E-148 | 0.287048927 | 0.888 | 0.508 | 6.07E-144 | Neuron |
| Rtl4 | Rtl4 | 5.86E-133 | 0.373710626 | 0.269 | 0.096 | 1.33E-128 | Neuron |
| Aff2 | Aff2 | 1.30E-113 | 0.376558577 | 0.304 | 0.13 | 2.95E-109 | Neuron |
| 1-Mar | 1-Mar | 3.02E-98 | 0.308762313 | 0.788 | 0.518 | 6.86E-94 | Neuron |
| Elavl2 | Elavl2 | 4.79E-90 | 0.332213183 | 0.299 | 0.14 | 1.09E-85 | Neuron |
| Pde4d | Pde4d | 4.25E-87 | 0.4399738 | 0.742 | 0.501 | 9.66E-83 | Neuron |
| Inpp4b | Inpp4b | 5.36E-85 | 0.365189265 | 0.444 | 0.247 | 1.22E-80 | Neuron |
| Sdk1 | Sdk1 | 2.96E-79 | 0.26860961 | 0.289 | 0.14 | 6.73E-75 | Neuron |
| Alk | Alk | 1.11E-72 | 0.617148089 | 0.27 | 0.142 | 2.52E-68 | Neuron |
| Kcnc2 | Kcnc2 | 4.60E-72 | 0.680573588 | 0.259 | 0.134 | 1.05E-67 | Neuron |
| Pcdh15 | Pcdh15 | 2.48E-48 | 0.470442346 | 0.498 | 0.344 | 5.63E-44 | Neuron |
| Prr5l | Prr5l | 0 | 4.517753108 | 0.976 | 0.049 | 0 | Oligodendrocyte |
| St18 | St18 | 0 | 4.508242257 | 0.986 | 0.117 | 0 | Oligodendrocyte |
| Mbp | Mbp | 0 | 4.022303015 | 0.995 | 0.409 | 0 | Oligodendrocyte |
| Rnf220 | Rnf220 | 0 | 3.894347913 | 0.948 | 0.23 | 0 | Oligodendrocyte |
| Mast4 | Mast4 | 0 | 3.585665405 | 0.982 | 0.357 | 0 | Oligodendrocyte |
| Edil3 | Edil3 | 0 | 3.486353359 | 0.991 | 0.45 | 0 | Oligodendrocyte |
| Tmeff2 | Tmeff2 | 0 | 3.483588991 | 0.999 | 0.729 | 0 | Oligodendrocyte |
| Zfp536 | Zfp536 | 0 | 3.47769989 | 0.954 | 0.144 | 0 | Oligodendrocyte |
| Mobp | Mobp | 0 | 3.363006328 | 0.882 | 0.098 | 0 | Oligodendrocyte |
| Plcl1 | Plcl1 | 0 | 3.341272859 | 0.994 | 0.499 | 0 | Oligodendrocyte |
| Gm16168 | Gm16168 | 0 | 3.296549539 | 0.82 | 0.16 | 0 | Oligodendrocyte |
| Aspa | Aspa | 0 | 3.27381175 | 0.851 | 0.042 | 0 | Oligodendrocyte |
| Enpp2 | Enpp2 | 0 | 3.263607545 | 0.917 | 0.181 | 0 | Oligodendrocyte |
| Plp1 | Plp1 | 0 | 3.16599778 | 0.999 | 0.817 | 0 | Oligodendrocyte |
| Pex5l | Pex5l | 0 | 3.154860407 | 0.878 | 0.477 | 0 | Oligodendrocyte |
| Ano4 | Ano4 | 0 | 3.128677308 | 0.923 | 0.336 | 0 | Oligodendrocyte |
| Slc24a2 | Slc24a2 | 0 | 3.1035887 | 0.999 | 0.766 | 0 | Oligodendrocyte |
| St6galnac3 | St6galnac3 | 0 | 3.092962572 | 0.972 | 0.59 | 0 | Oligodendrocyte |
| Mog | Mog | 0 | 3.031953013 | 0.83 | 0.072 | 0 | Oligodendrocyte |
| Pde4b | Pde4b | 0 | 3.019387545 | 1 | 0.831 | 0 | Oligodendrocyte |
| Arhgap23 | Arhgap23 | 0 | 3.015897848 | 0.907 | 0.274 | 0 | Oligodendrocyte |
| Dock10 | Dock10 | 0 | 2.953919262 | 0.989 | 0.672 | 0 | Oligodendrocyte |
| Pde8a | Pde8a | 0 | 2.943647836 | 0.776 | 0.063 | 0 | Oligodendrocyte |
| Fnbp1 | Fnbp1 | 0 | 2.89107148 | 0.966 | 0.547 | 0 | Oligodendrocyte |
| C030029H02Rik | C030029H02Rik | 0 | 2.887324175 | 0.658 | 0.02 | 0 | Oligodendrocyte |
| Ugt8a | Ugt8a | 0 | 2.815737582 | 0.775 | 0.098 | 0 | Oligodendrocyte |
| Sec14l5 | Sec14l5 | 0 | 2.804040594 | 0.756 | 0.069 | 0 | Oligodendrocyte |
| Frmd5 | Frmd5 | 0 | 2.799124204 | 0.986 | 0.737 | 0 | Oligodendrocyte |
| Phlpp1 | Phlpp1 | 0 | 2.784872588 | 0.981 | 0.719 | 0 | Oligodendrocyte |
| Map7 | Map7 | 0 | 2.784824148 | 0.97 | 0.655 | 0 | Oligodendrocyte |
| 7-Sep | 7-Sep | 0 | 2.756547863 | 0.927 | 0.523 | 0 | Oligodendrocyte |
| Fa2h | Fa2h | 0 | 2.745077685 | 0.774 | 0.093 | 0 | Oligodendrocyte |
| Phldb1 | Phldb1 | 0 | 2.676960542 | 0.783 | 0.118 | 0 | Oligodendrocyte |
| Sytl2 | Sytl2 | 0 | 2.672611166 | 0.669 | 0.077 | 0 | Oligodendrocyte |
| Zeb2 | Zeb2 | 0 | 2.631392513 | 0.971 | 0.333 | 0 | Oligodendrocyte |
| Plekhh1 | Plekhh1 | 0 | 2.617778672 | 0.716 | 0.052 | 0 | Oligodendrocyte |
| Mag | Mag | 0 | 2.605963987 | 0.742 | 0.093 | 0 | Oligodendrocyte |
| Ptprk | Ptprk | 0 | 2.592518044 | 0.841 | 0.172 | 0 | Oligodendrocyte |
| Pcdh9 | Pcdh9 | 0 | 2.585011442 | 1 | 0.969 | 0 | Oligodendrocyte |
| Gm4593 | Gm4593 | 0 | 2.571115235 | 0.668 | 0.02 | 0 | Oligodendrocyte |
| Pak1 | Pak1 | 0 | 2.520716457 | 0.821 | 0.332 | 0 | Oligodendrocyte |
| Ninj2 | Ninj2 | 0 | 2.499133696 | 0.577 | 0.029 | 0 | Oligodendrocyte |
| Bcas1 | Bcas1 | 0 | 2.487857529 | 0.774 | 0.069 | 0 | Oligodendrocyte |
| Tspan2 | Tspan2 | 0 | 2.480763263 | 0.671 | 0.116 | 0 | Oligodendrocyte |
| Car2 | Car2 | 0 | 2.468615732 | 0.715 | 0.159 | 0 | Oligodendrocyte |
| Gab1 | Gab1 | 0 | 2.415923708 | 0.769 | 0.169 | 0 | Oligodendrocyte |
| Creb5 | Creb5 | 0 | 2.400802403 | 0.648 | 0.069 | 0 | Oligodendrocyte |
| Gjc3 | Gjc3 | 0 | 2.398225773 | 0.682 | 0.06 | 0 | Oligodendrocyte |
| Bin1 | Bin1 | 0 | 2.380841518 | 0.823 | 0.378 | 0 | Oligodendrocyte |
| Qk | Qk | 0 | 2.365484487 | 0.992 | 0.723 | 0 | Oligodendrocyte |
| Pak7 | Pak7 | 0 | 2.357685034 | 0.867 | 0.582 | 0 | Oligodendrocyte |
| Cdh19 | Cdh19 | 0 | 2.32699529 | 0.657 | 0.094 | 0 | Oligodendrocyte |
| Pstpip2 | Pstpip2 | 0 | 2.307435424 | 0.598 | 0.07 | 0 | Oligodendrocyte |
| A230001M10Rik | A230001M10Rik | 0 | 2.301110155 | 0.54 | 0.021 | 0 | Oligodendrocyte |
| Tubb4a | Tubb4a | 0 | 2.297212199 | 0.736 | 0.233 | 0 | Oligodendrocyte |
| Neat1 | Neat1 | 0 | 2.296108763 | 0.573 | 0.084 | 0 | Oligodendrocyte |
| Gatm | Gatm | 0 | 2.288313393 | 0.673 | 0.104 | 0 | Oligodendrocyte |
| Ppp1r16b | Ppp1r16b | 0 | 2.282929093 | 0.847 | 0.523 | 0 | Oligodendrocyte |
| Erbin | Erbin | 0 | 2.272745613 | 0.854 | 0.532 | 0 | Oligodendrocyte |
| Mapt | Mapt | 0 | 2.247313681 | 0.956 | 0.739 | 0 | Oligodendrocyte |
| Pacrg | Pacrg | 0 | 2.239690407 | 0.786 | 0.4 | 0 | Oligodendrocyte |
| 4-Sep | 4-Sep | 0 | 2.225489548 | 0.626 | 0.09 | 0 | Oligodendrocyte |
| Prickle2 | Prickle2 | 0 | 2.222236132 | 0.936 | 0.734 | 0 | Oligodendrocyte |
| A330049N07Rik | A330049N07Rik | 0 | 2.207577808 | 0.449 | 0.016 | 0 | Oligodendrocyte |
| Cdc37l1 | Cdc37l1 | 0 | 2.2057636 | 0.82 | 0.442 | 0 | Oligodendrocyte |
| Cdk19 | Cdk19 | 0 | 2.18705836 | 0.831 | 0.507 | 0 | Oligodendrocyte |
| Aatk | Aatk | 0 | 2.141193942 | 0.729 | 0.307 | 0 | Oligodendrocyte |
| Cdh20 | Cdh20 | 0 | 2.127538265 | 0.674 | 0.191 | 0 | Oligodendrocyte |
| Kif13b | Kif13b | 0 | 2.126613493 | 0.759 | 0.376 | 0 | Oligodendrocyte |
| Slain1 | Slain1 | 0 | 2.116203157 | 0.724 | 0.328 | 0 | Oligodendrocyte |
| Palm2 | Palm2 | 0 | 2.113233927 | 0.652 | 0.375 | 0 | Oligodendrocyte |
| Myo1d | Myo1d | 0 | 2.106106537 | 0.679 | 0.258 | 0 | Oligodendrocyte |
| Slc12a2 | Slc12a2 | 0 | 2.104117696 | 0.709 | 0.294 | 0 | Oligodendrocyte |
| Il1rap | Il1rap | 0 | 2.096396653 | 0.68 | 0.207 | 0 | Oligodendrocyte |
| Kif13a | Kif13a | 0 | 2.093389632 | 0.747 | 0.379 | 0 | Oligodendrocyte |
| Opalin | Opalin | 0 | 2.073088147 | 0.504 | 0.039 | 0 | Oligodendrocyte |
| Arhgef10 | Arhgef10 | 0 | 2.071923548 | 0.618 | 0.127 | 0 | Oligodendrocyte |
| Anln | Anln | 0 | 2.070036193 | 0.451 | 0.038 | 0 | Oligodendrocyte |
| Adamtsl1 | Adamtsl1 | 0 | 2.05813328 | 0.577 | 0.101 | 0 | Oligodendrocyte |
| Daam2 | Daam2 | 0 | 2.057487837 | 0.662 | 0.095 | 0 | Oligodendrocyte |
| Nbas | Nbas | 0 | 2.054314495 | 0.806 | 0.507 | 0 | Oligodendrocyte |
| Vmp1 | Vmp1 | 0 | 2.049538632 | 0.812 | 0.532 | 0 | Oligodendrocyte |
| Sh3d19 | Sh3d19 | 0 | 2.033930138 | 0.675 | 0.172 | 0 | Oligodendrocyte |
| Clmn | Clmn | 0 | 2.02948382 | 0.668 | 0.188 | 0 | Oligodendrocyte |
| Cldn11 | Cldn11 | 0 | 2.023472221 | 0.662 | 0.19 | 0 | Oligodendrocyte |
| Ttyh2 | Ttyh2 | 0 | 2.017247399 | 0.581 | 0.065 | 0 | Oligodendrocyte |
| Plekhg1 | Plekhg1 | 0 | 2.015999007 | 0.689 | 0.144 | 0 | Oligodendrocyte |
| Rab31 | Rab31 | 0 | 2.007037952 | 0.69 | 0.182 | 0 | Oligodendrocyte |
| Otud7b | Otud7b | 0 | 2.007011937 | 0.704 | 0.306 | 0 | Oligodendrocyte |
| Synj2 | Synj2 | 0 | 1.994883862 | 0.54 | 0.084 | 0 | Oligodendrocyte |
| Nkain1 | Nkain1 | 0 | 1.989041526 | 0.529 | 0.053 | 0 | Oligodendrocyte |
| Adipor2 | Adipor2 | 0 | 1.960547727 | 0.582 | 0.236 | 0 | Oligodendrocyte |
| Ttll7 | Ttll7 | 0 | 1.95836608 | 0.79 | 0.526 | 0 | Oligodendrocyte |
| Ypel2 | Ypel2 | 0 | 1.952829847 | 0.843 | 0.572 | 0 | Oligodendrocyte |
| Grb14 | Grb14 | 0 | 1.923338948 | 0.588 | 0.173 | 0 | Oligodendrocyte |
| Mast3 | Mast3 | 0 | 1.909609011 | 0.615 | 0.238 | 0 | Oligodendrocyte |
| Hipk2 | Hipk2 | 0 | 1.907455951 | 0.766 | 0.331 | 0 | Oligodendrocyte |
| Magi2 | Magi2 | 0 | 1.90083831 | 1 | 0.962 | 0 | Oligodendrocyte |
| 4930419G24Rik | 4930419G24Rik | 0 | 1.888430079 | 0.479 | 0.149 | 0 | Oligodendrocyte |
| Rtn4 | Rtn4 | 0 | 1.884707515 | 0.927 | 0.76 | 0 | Oligodendrocyte |
| Wipf1 | Wipf1 | 0 | 1.876504881 | 0.575 | 0.121 | 0 | Oligodendrocyte |
| Kndc1 | Kndc1 | 0 | 1.871250668 | 0.515 | 0.121 | 0 | Oligodendrocyte |
| Cntn2 | Cntn2 | 0 | 1.838535336 | 0.524 | 0.108 | 0 | Oligodendrocyte |
| Rffl | Rffl | 0 | 1.836600106 | 0.591 | 0.21 | 0 | Oligodendrocyte |
| Dock5 | Dock5 | 0 | 1.835992376 | 0.454 | 0.024 | 0 | Oligodendrocyte |
| Elovl7 | Elovl7 | 0 | 1.82821492 | 0.49 | 0.079 | 0 | Oligodendrocyte |
| Usp54 | Usp54 | 0 | 1.82290364 | 0.647 | 0.251 | 0 | Oligodendrocyte |
| Mal | Mal | 0 | 1.798500842 | 0.584 | 0.192 | 0 | Oligodendrocyte |
| Il33 | Il33 | 0 | 1.788532346 | 0.365 | 0.039 | 0 | Oligodendrocyte |
| Dip2a | Dip2a | 0 | 1.784645697 | 0.589 | 0.232 | 0 | Oligodendrocyte |
| Clic4 | Clic4 | 0 | 1.78289552 | 0.513 | 0.089 | 0 | Oligodendrocyte |
| Arhgef28 | Arhgef28 | 0 | 1.773519727 | 0.561 | 0.145 | 0 | Oligodendrocyte |
| Klhl2 | Klhl2 | 0 | 1.764630463 | 0.848 | 0.666 | 0 | Oligodendrocyte |
| D7Ertd443e | D7Ertd443e | 0 | 1.760521909 | 0.518 | 0.178 | 0 | Oligodendrocyte |
| Tbc1d5 | Tbc1d5 | 0 | 1.743024203 | 0.883 | 0.743 | 0 | Oligodendrocyte |
| Unc5c | Unc5c | 0 | 1.737859996 | 0.907 | 0.659 | 0 | Oligodendrocyte |
| Shtn1 | Shtn1 | 0 | 1.725363052 | 0.749 | 0.529 | 0 | Oligodendrocyte |
| Ppfibp2 | Ppfibp2 | 0 | 1.713082339 | 0.459 | 0.054 | 0 | Oligodendrocyte |
| Smad7 | Smad7 | 0 | 1.700645058 | 0.516 | 0.171 | 0 | Oligodendrocyte |
| Pacs2 | Pacs2 | 0 | 1.698374862 | 0.565 | 0.242 | 0 | Oligodendrocyte |
| Daam1 | Daam1 | 0 | 1.694165158 | 0.706 | 0.458 | 0 | Oligodendrocyte |
| Stxbp6 | Stxbp6 | 0 | 1.69286016 | 0.652 | 0.349 | 0 | Oligodendrocyte |
| Apod | Apod | 0 | 1.689112978 | 0.457 | 0.111 | 0 | Oligodendrocyte |
| 1700047M11Rik | 1700047M11Rik | 0 | 1.686181441 | 0.427 | 0.024 | 0 | Oligodendrocyte |
| Abhd17b | Abhd17b | 0 | 1.682020763 | 0.64 | 0.371 | 0 | Oligodendrocyte |
| Exoc6b | Exoc6b | 0 | 1.67380381 | 0.905 | 0.809 | 0 | Oligodendrocyte |
| Sema6a | Sema6a | 0 | 1.66816456 | 0.597 | 0.224 | 0 | Oligodendrocyte |
| Nkain2 | Nkain2 | 0 | 1.661781345 | 1 | 0.946 | 0 | Oligodendrocyte |
| Dnm3 | Dnm3 | 0 | 1.654681029 | 0.949 | 0.793 | 0 | Oligodendrocyte |
| Slc44a1 | Slc44a1 | 0 | 1.654261783 | 0.715 | 0.53 | 0 | Oligodendrocyte |
| Ppp2r3a | Ppp2r3a | 0 | 1.649714675 | 0.725 | 0.474 | 0 | Oligodendrocyte |
| Nrbp2 | Nrbp2 | 0 | 1.625054588 | 0.527 | 0.163 | 0 | Oligodendrocyte |
| Rftn1 | Rftn1 | 0 | 1.622136728 | 0.401 | 0.094 | 0 | Oligodendrocyte |
| 5031439G07Rik | 5031439G07Rik | 0 | 1.617215467 | 0.605 | 0.346 | 0 | Oligodendrocyte |
| Rcbtb1 | Rcbtb1 | 0 | 1.616794344 | 0.53 | 0.215 | 0 | Oligodendrocyte |
| Olfml1 | Olfml1 | 0 | 1.616075035 | 0.395 | 0.024 | 0 | Oligodendrocyte |
| Kcnk13 | Kcnk13 | 0 | 1.611201495 | 0.44 | 0.111 | 0 | Oligodendrocyte |
| Tmod2 | Tmod2 | 0 | 1.60794037 | 0.712 | 0.556 | 0 | Oligodendrocyte |
| Plekhg3 | Plekhg3 | 0 | 1.607763578 | 0.411 | 0.027 | 0 | Oligodendrocyte |
| Nfasc | Nfasc | 0 | 1.605536238 | 0.794 | 0.624 | 0 | Oligodendrocyte |
| Litaf | Litaf | 0 | 1.597221093 | 0.446 | 0.07 | 0 | Oligodendrocyte |
| Fgfr2 | Fgfr2 | 0 | 1.594901773 | 0.918 | 0.834 | 0 | Oligodendrocyte |
| Myo6 | Myo6 | 0 | 1.586453083 | 0.695 | 0.326 | 0 | Oligodendrocyte |
| Cobll1 | Cobll1 | 0 | 1.582875595 | 0.45 | 0.069 | 0 | Oligodendrocyte |
| Tulp4 | Tulp4 | 0 | 1.5642405 | 0.768 | 0.619 | 0 | Oligodendrocyte |
| Dscaml1 | Dscaml1 | 0 | 1.561914812 | 0.826 | 0.624 | 0 | Oligodendrocyte |
| Gna12 | Gna12 | 0 | 1.560250424 | 0.513 | 0.192 | 0 | Oligodendrocyte |
| Insc | Insc | 0 | 1.554882872 | 0.367 | 0.013 | 0 | Oligodendrocyte |
| Tnfaip6 | Tnfaip6 | 0 | 1.552148102 | 0.354 | 0.025 | 0 | Oligodendrocyte |
| Atp8b1 | Atp8b1 | 0 | 1.545299011 | 0.37 | 0.027 | 0 | Oligodendrocyte |
| Srcin1 | Srcin1 | 0 | 1.538663006 | 0.68 | 0.522 | 0 | Oligodendrocyte |
| Ccp110 | Ccp110 | 0 | 1.53804144 | 0.417 | 0.103 | 0 | Oligodendrocyte |
| Lpar1 | Lpar1 | 0 | 1.523920219 | 0.383 | 0.049 | 0 | Oligodendrocyte |
| Agap1 | Agap1 | 0 | 1.519623686 | 0.855 | 0.755 | 0 | Oligodendrocyte |
| St6gal1 | St6gal1 | 0 | 1.516596092 | 0.564 | 0.173 | 0 | Oligodendrocyte |
| Gm42413 | Gm42413 | 0 | 1.515616659 | 0.371 | 0.06 | 0 | Oligodendrocyte |
| Frmd4b | Frmd4b | 0 | 1.510662961 | 0.849 | 0.614 | 0 | Oligodendrocyte |
| Pip4k2a | Pip4k2a | 0 | 1.510047231 | 0.687 | 0.429 | 0 | Oligodendrocyte |
| Dock1 | Dock1 | 0 | 1.495655402 | 0.656 | 0.29 | 0 | Oligodendrocyte |
| Plxdc2 | Plxdc2 | 0 | 1.47586139 | 0.893 | 0.476 | 0 | Oligodendrocyte |
| Map4 | Map4 | 0 | 1.474943298 | 0.729 | 0.571 | 0 | Oligodendrocyte |
| Pla2g16 | Pla2g16 | 0 | 1.467062849 | 0.385 | 0.045 | 0 | Oligodendrocyte |
| Clasp2 | Clasp2 | 0 | 1.465617816 | 0.923 | 0.855 | 0 | Oligodendrocyte |
| Arsg | Arsg | 0 | 1.461439397 | 0.38 | 0.066 | 0 | Oligodendrocyte |
| Wnk1 | Wnk1 | 0 | 1.450010954 | 0.817 | 0.721 | 0 | Oligodendrocyte |
| Tmem63a | Tmem63a | 0 | 1.448764343 | 0.362 | 0.02 | 0 | Oligodendrocyte |
| Prkcq | Prkcq | 0 | 1.439952393 | 0.37 | 0.045 | 0 | Oligodendrocyte |
| Prox1 | Prox1 | 0 | 1.43650847 | 0.394 | 0.063 | 0 | Oligodendrocyte |
| Cyp2j12 | Cyp2j12 | 0 | 1.433733877 | 0.302 | 0.009 | 0 | Oligodendrocyte |
| Sox10 | Sox10 | 0 | 1.431661805 | 0.365 | 0.037 | 0 | Oligodendrocyte |
| Tsc22d3 | Tsc22d3 | 0 | 1.424686546 | 0.363 | 0.06 | 0 | Oligodendrocyte |
| Csrp1 | Csrp1 | 0 | 1.417024837 | 0.417 | 0.084 | 0 | Oligodendrocyte |
| Limch1 | Limch1 | 0 | 1.407712164 | 0.857 | 0.747 | 0 | Oligodendrocyte |
| Hapln2 | Hapln2 | 0 | 1.38620412 | 0.302 | 0.019 | 0 | Oligodendrocyte |
| Slc8a1 | Slc8a1 | 0 | 1.381249156 | 0.851 | 0.519 | 0 | Oligodendrocyte |
| Megf10 | Megf10 | 0 | 1.349532703 | 0.409 | 0.102 | 0 | Oligodendrocyte |
| Trim59 | Trim59 | 0 | 1.345674142 | 0.321 | 0.04 | 0 | Oligodendrocyte |
| Cdc42bpa | Cdc42bpa | 0 | 1.345626862 | 0.893 | 0.835 | 0 | Oligodendrocyte |
| Mboat1 | Mboat1 | 0 | 1.343458341 | 0.294 | 0.024 | 0 | Oligodendrocyte |
| Ctnna3 | Ctnna3 | 0 | 1.338743997 | 0.887 | 0.773 | 0 | Oligodendrocyte |
| Ptgds | Ptgds | 0 | 1.335695802 | 0.251 | 0.028 | 0 | Oligodendrocyte |
| Micall1 | Micall1 | 0 | 1.331632666 | 0.348 | 0.063 | 0 | Oligodendrocyte |
| Gal3st1 | Gal3st1 | 0 | 1.330105531 | 0.333 | 0.038 | 0 | Oligodendrocyte |
| Folh1 | Folh1 | 0 | 1.327967829 | 0.331 | 0.04 | 0 | Oligodendrocyte |
| Cpm | Cpm | 0 | 1.326021238 | 0.302 | 0.028 | 0 | Oligodendrocyte |
| Hhip | Hhip | 0 | 1.325129874 | 0.29 | 0.029 | 0 | Oligodendrocyte |
| Wscd1 | Wscd1 | 0 | 1.317407681 | 0.361 | 0.072 | 0 | Oligodendrocyte |
| Klhl4 | Klhl4 | 0 | 1.311551452 | 0.292 | 0.038 | 0 | Oligodendrocyte |
| Lgi3 | Lgi3 | 0 | 1.311360543 | 0.351 | 0.082 | 0 | Oligodendrocyte |
| Galnt6 | Galnt6 | 0 | 1.300869208 | 0.291 | 0.011 | 0 | Oligodendrocyte |
| Myo1e | Myo1e | 0 | 1.296463602 | 0.367 | 0.081 | 0 | Oligodendrocyte |
| Hecw2 | Hecw2 | 0 | 1.296279633 | 0.892 | 0.756 | 0 | Oligodendrocyte |
| Tcf12 | Tcf12 | 0 | 1.296213019 | 0.877 | 0.845 | 0 | Oligodendrocyte |
| Myrf | Myrf | 0 | 1.27917252 | 0.303 | 0.019 | 0 | Oligodendrocyte |
| Baz2b | Baz2b | 0 | 1.276862086 | 0.797 | 0.742 | 0 | Oligodendrocyte |
| Kif1b | Kif1b | 0 | 1.272838356 | 0.915 | 0.88 | 0 | Oligodendrocyte |
| Sik3 | Sik3 | 0 | 1.251518069 | 0.906 | 0.865 | 0 | Oligodendrocyte |
| Hepacam | Hepacam | 0 | 1.218878196 | 0.469 | 0.144 | 0 | Oligodendrocyte |
| Ube2e2 | Ube2e2 | 0 | 1.217680497 | 0.856 | 0.823 | 0 | Oligodendrocyte |
| Ermn | Ermn | 0 | 1.210765915 | 0.292 | 0.033 | 0 | Oligodendrocyte |
| Gm42418 | Gm42418 | 0 | 1.210097659 | 0.999 | 0.999 | 0 | Oligodendrocyte |
| Ankub1 | Ankub1 | 0 | 1.19665093 | 0.284 | 0.027 | 0 | Oligodendrocyte |
| App | App | 0 | 1.151389277 | 0.929 | 0.886 | 0 | Oligodendrocyte |
| Tmem178b | Tmem178b | 0 | 1.123898827 | 0.91 | 0.84 | 0 | Oligodendrocyte |
| Atp8a1 | Atp8a1 | 0 | 1.118678896 | 0.89 | 0.843 | 0 | Oligodendrocyte |
| Ncam1 | Ncam1 | 0 | 1.105982274 | 0.958 | 0.91 | 0 | Oligodendrocyte |
| Unc5b | Unc5b | 0 | 1.094198874 | 0.256 | 0.031 | 0 | Oligodendrocyte |
| Ssh2 | Ssh2 | 0 | 1.090613616 | 0.848 | 0.826 | 0 | Oligodendrocyte |
| Tmcc1 | Tmcc1 | 0 | 1.079223633 | 0.844 | 0.849 | 0 | Oligodendrocyte |
| Plxnb3 | Plxnb3 | 0 | 1.057446011 | 0.251 | 0.021 | 0 | Oligodendrocyte |
| Trim36 | Trim36 | 0 | 1.011968326 | 0.25 | 0.035 | 0 | Oligodendrocyte |
| Ptprd1 | Ptprd | 0 | 0.985823923 | 1 | 0.945 | 0 | Oligodendrocyte |
| Mbnl2 | Mbnl2 | 0 | 0.967423447 | 0.916 | 0.872 | 0 | Oligodendrocyte |
| Elmo1 | Elmo1 | 0 | 0.939715589 | 0.891 | 0.81 | 0 | Oligodendrocyte |
| Ank2 | Ank2 | 0 | 0.939273167 | 0.987 | 0.964 | 0 | Oligodendrocyte |
| Malat1 | Malat1 | 0 | 0.874989298 | 1 | 1 | 0 | Oligodendrocyte |
| Erbb4 | Erbb4 | 0 | 0.441034041 | 0.927 | 0.678 | 0 | Oligodendrocyte |
| Tjp2 | Tjp2 | 6.71E-305 | 1.183662528 | 0.368 | 0.096 | 1.52E-300 | Oligodendrocyte |
| Ndrg1 | Ndrg1 | 2.13E-302 | 1.120327574 | 0.272 | 0.05 | 4.84E-298 | Oligodendrocyte |
| Grm3 | Grm3 | 2.58E-300 | 0.966364462 | 0.918 | 0.777 | 5.85E-296 | Oligodendrocyte |
| Bcl2l1 | Bcl2l1 | 8.58E-299 | 1.551754266 | 0.595 | 0.348 | 1.95E-294 | Oligodendrocyte |
| Zdhhc20 | Zdhhc20 | 3.88E-296 | 1.563441691 | 0.712 | 0.617 | 8.82E-292 | Oligodendrocyte |
| Pls1 | Pls1 | 1.89E-292 | 1.658479295 | 0.479 | 0.21 | 4.30E-288 | Oligodendrocyte |
| Naaladl2 | Naaladl2 | 9.79E-290 | 1.578492886 | 0.723 | 0.587 | 2.22E-285 | Oligodendrocyte |
| Ddr1 | Ddr1 | 8.05E-289 | 1.492027128 | 0.498 | 0.224 | 1.83E-284 | Oligodendrocyte |
| Itpk1 | Itpk1 | 3.45E-288 | 1.364131256 | 0.418 | 0.147 | 7.83E-284 | Oligodendrocyte |
| Kctd13 | Kctd13 | 8.10E-285 | 1.383220251 | 0.398 | 0.134 | 1.84E-280 | Oligodendrocyte |
| Plekha1 | Plekha1 | 1.21E-283 | 1.772104359 | 0.6 | 0.39 | 2.74E-279 | Oligodendrocyte |
| Prrg1 | Prrg1 | 4.37E-283 | 1.263106418 | 0.285 | 0.06 | 9.94E-279 | Oligodendrocyte |
| Cmss1 | Cmss1 | 5.13E-282 | 0.903845283 | 0.869 | 0.886 | 1.17E-277 | Oligodendrocyte |
| Foxn3 | Foxn3 | 7.73E-280 | 1.140948145 | 0.736 | 0.525 | 1.76E-275 | Oligodendrocyte |
| Shisa4 | Shisa4 | 8.48E-279 | 1.220714061 | 0.367 | 0.108 | 1.93E-274 | Oligodendrocyte |
| Nfe2l3 | Nfe2l3 | 2.91E-278 | 1.22250981 | 0.287 | 0.064 | 6.60E-274 | Oligodendrocyte |
| Gm37459 | Gm37459 | 2.94E-277 | 1.360731255 | 0.309 | 0.077 | 6.67E-273 | Oligodendrocyte |
| Tmcc3 | Tmcc3 | 9.64E-272 | 0.973115298 | 0.683 | 0.416 | 2.19E-267 | Oligodendrocyte |
| Gpm6b | Gpm6b | 2.10E-269 | 0.851434979 | 0.912 | 0.893 | 4.78E-265 | Oligodendrocyte |
| Jam3 | Jam3 | 2.34E-266 | 1.48304578 | 0.494 | 0.239 | 5.32E-262 | Oligodendrocyte |
| Rasgrp3 | Rasgrp3 | 1.87E-265 | 0.909343513 | 0.254 | 0.045 | 4.24E-261 | Oligodendrocyte |
| Pkp4 | Pkp4 | 7.93E-265 | 1.36720322 | 0.7 | 0.6 | 1.80E-260 | Oligodendrocyte |
| Fign | Fign | 3.14E-263 | 1.399267926 | 0.433 | 0.162 | 7.14E-259 | Oligodendrocyte |
| Prkd3 | Prkd3 | 6.76E-261 | 1.066973402 | 0.315 | 0.08 | 1.54E-256 | Oligodendrocyte |
| Gpr37 | Gpr37 | 5.68E-258 | 1.043919267 | 0.27 | 0.059 | 1.29E-253 | Oligodendrocyte |
| Lpgat1 | Lpgat1 | 2.81E-257 | 1.490478566 | 0.66 | 0.545 | 6.39E-253 | Oligodendrocyte |
| Fmnl2 | Fmnl2 | 1.23E-256 | 1.372754697 | 0.662 | 0.427 | 2.80E-252 | Oligodendrocyte |
| Pld1 | Pld1 | 1.02E-247 | 0.948660299 | 0.311 | 0.077 | 2.32E-243 | Oligodendrocyte |
| Rassf2 | Rassf2 | 1.27E-247 | 0.965144815 | 0.251 | 0.05 | 2.89E-243 | Oligodendrocyte |
| Arrdc3 | Arrdc3 | 2.28E-244 | 1.31022948 | 0.366 | 0.125 | 5.18E-240 | Oligodendrocyte |
| Scd2 | Scd2 | 2.11E-243 | 1.308430684 | 0.635 | 0.445 | 4.79E-239 | Oligodendrocyte |
| Tmem163 | Tmem163 | 6.29E-243 | 1.186592897 | 0.314 | 0.085 | 1.43E-238 | Oligodendrocyte |
| Dip2b | Dip2b | 9.90E-240 | 1.142330391 | 0.732 | 0.688 | 2.25E-235 | Oligodendrocyte |
| Ptn | Ptn | 1.43E-238 | 1.214565471 | 0.704 | 0.568 | 3.26E-234 | Oligodendrocyte |
| Ankrd28 | Ankrd28 | 1.94E-238 | 1.197098029 | 0.712 | 0.662 | 4.41E-234 | Oligodendrocyte |
| Ttll5 | Ttll5 | 8.82E-236 | 1.501502253 | 0.564 | 0.359 | 2.00E-231 | Oligodendrocyte |
| Kif6 | Kif6 | 3.04E-235 | 1.265174071 | 0.326 | 0.098 | 6.91E-231 | Oligodendrocyte |
| Nfix | Nfix | 2.77E-234 | 1.098302591 | 0.42 | 0.155 | 6.30E-230 | Oligodendrocyte |
| Stxbp3 | Stxbp3 | 4.10E-228 | 1.229266318 | 0.376 | 0.139 | 9.32E-224 | Oligodendrocyte |
| Dlg1 | Dlg1 | 1.28E-225 | 0.968963851 | 0.785 | 0.775 | 2.91E-221 | Oligodendrocyte |
| Dst | Dst | 2.00E-223 | 0.864981152 | 0.811 | 0.837 | 4.54E-219 | Oligodendrocyte |
| Ptk2 | Ptk2 | 2.88E-221 | 0.950779085 | 0.774 | 0.792 | 6.55E-217 | Oligodendrocyte |
| Snx30 | Snx30 | 1.09E-218 | 1.433136951 | 0.476 | 0.253 | 2.46E-214 | Oligodendrocyte |
| Nfia | Nfia | 2.67E-217 | 0.518384292 | 0.742 | 0.374 | 6.07E-213 | Oligodendrocyte |
| Efnb3 | Efnb3 | 4.93E-212 | 1.34677268 | 0.454 | 0.231 | 1.12E-207 | Oligodendrocyte |
| Fryl | Fryl | 9.96E-211 | 1.188613134 | 0.674 | 0.602 | 2.26E-206 | Oligodendrocyte |
| Trim2 | Trim2 | 9.29E-209 | 0.996024127 | 0.79 | 0.796 | 2.11E-204 | Oligodendrocyte |
| Slc25a13 | Slc25a13 | 6.52E-208 | 1.319963703 | 0.351 | 0.133 | 1.48E-203 | Oligodendrocyte |
| Itsn2 | Itsn2 | 9.42E-206 | 1.268814044 | 0.655 | 0.585 | 2.14E-201 | Oligodendrocyte |
| Qdpr | Qdpr | 3.55E-205 | 0.990139491 | 0.252 | 0.064 | 8.07E-201 | Oligodendrocyte |
| Dusp16 | Dusp16 | 1.50E-204 | 1.109738851 | 0.32 | 0.105 | 3.40E-200 | Oligodendrocyte |
| Fam102a | Fam102a | 2.68E-200 | 1.236198827 | 0.377 | 0.159 | 6.08E-196 | Oligodendrocyte |
| Heg1 | Heg1 | 2.49E-199 | 1.22589402 | 0.328 | 0.113 | 5.66E-195 | Oligodendrocyte |
| Abca2 | Abca2 | 2.88E-198 | 1.251156443 | 0.398 | 0.18 | 6.55E-194 | Oligodendrocyte |
| Lama2 | Lama2 | 8.21E-198 | 0.943080719 | 0.426 | 0.162 | 1.86E-193 | Oligodendrocyte |
| Tmeff1 | Tmeff1 | 3.17E-196 | 1.42321779 | 0.562 | 0.408 | 7.20E-192 | Oligodendrocyte |
| Spns2 | Spns2 | 1.36E-194 | 1.029715788 | 0.276 | 0.083 | 3.10E-190 | Oligodendrocyte |
| Rap1a | Rap1a | 6.58E-194 | 1.416703625 | 0.536 | 0.355 | 1.49E-189 | Oligodendrocyte |
| Ankib1 | Ankib1 | 6.61E-194 | 1.331326539 | 0.62 | 0.536 | 1.50E-189 | Oligodendrocyte |
| Ywhaq | Ywhaq | 1.72E-193 | 1.39507189 | 0.55 | 0.382 | 3.92E-189 | Oligodendrocyte |
| Rnf13 | Rnf13 | 1.03E-192 | 1.294820138 | 0.572 | 0.416 | 2.34E-188 | Oligodendrocyte |
| Cdh10 | Cdh10 | 1.04E-191 | 1.215102096 | 0.732 | 0.663 | 2.37E-187 | Oligodendrocyte |
| Lrp1b1 | Lrp1b | 4.54E-191 | 0.546953825 | 0.999 | 0.929 | 1.03E-186 | Oligodendrocyte |
| Mob3b | Mob3b | 1.15E-190 | 1.191550981 | 0.32 | 0.107 | 2.61E-186 | Oligodendrocyte |
| Itch | Itch | 1.64E-189 | 1.133545222 | 0.673 | 0.625 | 3.73E-185 | Oligodendrocyte |
| Kif21a | Kif21a | 1.95E-188 | 0.965089507 | 0.735 | 0.734 | 4.43E-184 | Oligodendrocyte |
| Sez6l2 | Sez6l2 | 6.61E-185 | 1.421936511 | 0.457 | 0.263 | 1.50E-180 | Oligodendrocyte |
| Agpat4 | Agpat4 | 1.48E-179 | 1.275960423 | 0.402 | 0.197 | 3.36E-175 | Oligodendrocyte |
| Vps8 | Vps8 | 9.09E-179 | 1.335730022 | 0.503 | 0.327 | 2.07E-174 | Oligodendrocyte |
| Cep97 | Cep97 | 2.58E-178 | 1.240053132 | 0.376 | 0.172 | 5.86E-174 | Oligodendrocyte |
| Gsn | Gsn | 1.66E-176 | 1.012904996 | 0.277 | 0.089 | 3.76E-172 | Oligodendrocyte |
| Osbpl1a | Osbpl1a | 9.48E-175 | 1.268545422 | 0.507 | 0.334 | 2.15E-170 | Oligodendrocyte |
| Tcf4 | Tcf4 | 3.72E-174 | 0.495598937 | 0.831 | 0.66 | 8.44E-170 | Oligodendrocyte |
| Cyth1 | Cyth1 | 2.46E-173 | 1.341239275 | 0.519 | 0.361 | 5.58E-169 | Oligodendrocyte |
| Stmn4 | Stmn4 | 3.71E-173 | 1.213554053 | 0.391 | 0.188 | 8.42E-169 | Oligodendrocyte |
| Tmbim1 | Tmbim1 | 1.56E-172 | 1.037870733 | 0.293 | 0.105 | 3.54E-168 | Oligodendrocyte |
| Cnp | Cnp | 2.51E-170 | 1.143069098 | 0.357 | 0.155 | 5.71E-166 | Oligodendrocyte |
| Pcsk6 | Pcsk6 | 3.44E-170 | 0.893284826 | 0.252 | 0.074 | 7.82E-166 | Oligodendrocyte |
| Gnao1 | Gnao1 | 3.80E-170 | 0.723529122 | 0.819 | 0.844 | 8.63E-166 | Oligodendrocyte |
| 9330111N05Rik | 9330111N05Rik | 5.63E-170 | 2.174557836 | 0.278 | 0.095 | 1.28E-165 | Oligodendrocyte |
| Picalm | Picalm | 3.92E-168 | 1.117642929 | 0.637 | 0.571 | 8.91E-164 | Oligodendrocyte |
| Acaca | Acaca | 1.35E-164 | 1.258503969 | 0.619 | 0.546 | 3.07E-160 | Oligodendrocyte |
| Kcna1 | Kcna1 | 1.35E-159 | 1.330114364 | 0.484 | 0.325 | 3.06E-155 | Oligodendrocyte |
| Klf13 | Klf13 | 7.34E-158 | 1.241500034 | 0.418 | 0.229 | 1.67E-153 | Oligodendrocyte |
| Map4k4 | Map4k4 | 1.05E-157 | 1.000520702 | 0.63 | 0.529 | 2.38E-153 | Oligodendrocyte |
| Ube2d1 | Ube2d1 | 1.49E-156 | 1.294508624 | 0.48 | 0.32 | 3.38E-152 | Oligodendrocyte |
| Neo1 | Neo1 | 2.82E-148 | 1.123031445 | 0.62 | 0.57 | 6.41E-144 | Oligodendrocyte |
| Aplp1 | Aplp1 | 3.99E-148 | 1.077156391 | 0.617 | 0.564 | 9.07E-144 | Oligodendrocyte |
| Ubash3b | Ubash3b | 2.49E-145 | 0.995452803 | 0.434 | 0.228 | 5.66E-141 | Oligodendrocyte |
| Desi1 | Desi1 | 4.88E-145 | 1.297151254 | 0.439 | 0.276 | 1.11E-140 | Oligodendrocyte |
| Mtmr2 | Mtmr2 | 1.23E-143 | 1.114201534 | 0.346 | 0.167 | 2.80E-139 | Oligodendrocyte |
| Chd7 | Chd7 | 4.08E-143 | 0.881862756 | 0.451 | 0.236 | 9.28E-139 | Oligodendrocyte |
| Tmem151a | Tmem151a | 6.83E-139 | 1.126226794 | 0.351 | 0.175 | 1.55E-134 | Oligodendrocyte |
| Eps15 | Eps15 | 9.79E-137 | 0.998381725 | 0.5 | 0.322 | 2.22E-132 | Oligodendrocyte |
| Kcna6 | Kcna6 | 1.33E-134 | 1.035822169 | 0.29 | 0.122 | 3.03E-130 | Oligodendrocyte |
| Ick | Ick | 1.28E-130 | 1.024197873 | 0.31 | 0.139 | 2.91E-126 | Oligodendrocyte |
| Dpy19l1 | Dpy19l1 | 3.58E-130 | 1.129765005 | 0.38 | 0.211 | 8.13E-126 | Oligodendrocyte |
| Ncam2 | Ncam2 | 7.14E-128 | 0.64123108 | 0.902 | 0.849 | 1.62E-123 | Oligodendrocyte |
| Zdhhc14 | Zdhhc14 | 1.47E-124 | 0.741238626 | 0.753 | 0.739 | 3.34E-120 | Oligodendrocyte |
| Fth1 | Fth1 | 5.05E-123 | 1.080175994 | 0.56 | 0.464 | 1.15E-118 | Oligodendrocyte |
| Hid1 | Hid1 | 1.87E-122 | 0.990994988 | 0.266 | 0.111 | 4.25E-118 | Oligodendrocyte |
| Pik3c2b | Pik3c2b | 3.84E-122 | 1.261205447 | 0.458 | 0.338 | 8.72E-118 | Oligodendrocyte |
| Tspan14 | Tspan14 | 1.26E-121 | 0.815011317 | 0.259 | 0.099 | 2.87E-117 | Oligodendrocyte |
| Kctd3 | Kctd3 | 1.66E-121 | 1.183589784 | 0.343 | 0.182 | 3.77E-117 | Oligodendrocyte |
| Epn2 | Epn2 | 2.08E-121 | 0.974328655 | 0.576 | 0.514 | 4.72E-117 | Oligodendrocyte |
| Syt11 | Syt11 | 1.04E-118 | 0.937440162 | 0.641 | 0.658 | 2.36E-114 | Oligodendrocyte |
| Mta3 | Mta3 | 4.09E-117 | 1.103478933 | 0.394 | 0.239 | 9.28E-113 | Oligodendrocyte |
| Dennd5a | Dennd5a | 1.93E-113 | 1.068306369 | 0.55 | 0.493 | 4.39E-109 | Oligodendrocyte |
| Tppp | Tppp | 1.20E-112 | 1.020018469 | 0.305 | 0.151 | 2.72E-108 | Oligodendrocyte |
| Tesk2 | Tesk2 | 1.98E-112 | 1.007067728 | 0.258 | 0.108 | 4.51E-108 | Oligodendrocyte |
| Bmp2k | Bmp2k | 1.01E-111 | 0.797532946 | 0.341 | 0.168 | 2.29E-107 | Oligodendrocyte |
| Sorcs11 | Sorcs1 | 1.02E-111 | 0.663914311 | 0.799 | 0.72 | 2.31E-107 | Oligodendrocyte |
| Stmn1 | Stmn1 | 6.23E-110 | 0.93798992 | 0.329 | 0.167 | 1.41E-105 | Oligodendrocyte |
| Tanc1 | Tanc1 | 1.75E-107 | 0.978700141 | 0.302 | 0.147 | 3.97E-103 | Oligodendrocyte |
| Gas7 | Gas7 | 1.78E-107 | 1.161015568 | 0.568 | 0.556 | 4.05E-103 | Oligodendrocyte |
| Apbb2 | Apbb2 | 6.47E-107 | 0.923793111 | 0.657 | 0.7 | 1.47E-102 | Oligodendrocyte |
| Lrrn1 | Lrrn1 | 1.15E-106 | 1.00263976 | 0.31 | 0.157 | 2.60E-102 | Oligodendrocyte |
| E130308A19Rik | E130308A19Rik | 2.03E-105 | 1.097275086 | 0.459 | 0.338 | 4.62E-101 | Oligodendrocyte |
| Cipc | Cipc | 7.83E-104 | 1.110525332 | 0.494 | 0.415 | 1.78E-99 | Oligodendrocyte |
| Kat2b | Kat2b | 1.18E-100 | 1.09649855 | 0.449 | 0.331 | 2.69E-96 | Oligodendrocyte |
| Tmtc2 | Tmtc2 | 2.82E-100 | 1.01150421 | 0.575 | 0.502 | 6.41E-96 | Oligodendrocyte |
| St3gal4 | St3gal4 | 3.12E-100 | 0.867930736 | 0.475 | 0.316 | 7.09E-96 | Oligodendrocyte |
| Map4k5 | Map4k5 | 7.85E-98 | 1.077510874 | 0.537 | 0.51 | 1.78E-93 | Oligodendrocyte |
| Gm11149 | Gm11149 | 7.63E-97 | 1.125961209 | 0.493 | 0.412 | 1.73E-92 | Oligodendrocyte |
| Rab40c | Rab40c | 1.47E-96 | 1.076918202 | 0.513 | 0.467 | 3.35E-92 | Oligodendrocyte |
| Cpeb2 | Cpeb2 | 1.88E-95 | 1.075339015 | 0.514 | 0.464 | 4.27E-91 | Oligodendrocyte |
| Pafah1b1 | Pafah1b1 | 5.74E-95 | 0.719199932 | 0.706 | 0.805 | 1.30E-90 | Oligodendrocyte |
| Fam134b | Fam134b | 2.13E-94 | 1.017789892 | 0.481 | 0.387 | 4.84E-90 | Oligodendrocyte |
| Rdx | Rdx | 2.78E-93 | 0.976738211 | 0.344 | 0.203 | 6.31E-89 | Oligodendrocyte |
| Rere | Rere | 3.99E-93 | 0.527618093 | 0.826 | 0.911 | 9.05E-89 | Oligodendrocyte |
| Slc9a9 | Slc9a9 | 2.58E-91 | 0.804844276 | 0.496 | 0.365 | 5.86E-87 | Oligodendrocyte |
| Meis1 | Meis1 | 1.07E-88 | 0.898697912 | 0.396 | 0.255 | 2.43E-84 | Oligodendrocyte |
| Dpysl2 | Dpysl2 | 6.65E-87 | 0.867201934 | 0.605 | 0.642 | 1.51E-82 | Oligodendrocyte |
| Tns3 | Tns3 | 8.54E-86 | 0.586532343 | 0.279 | 0.13 | 1.94E-81 | Oligodendrocyte |
| Fbxo7 | Fbxo7 | 1.47E-85 | 0.875147337 | 0.26 | 0.129 | 3.35E-81 | Oligodendrocyte |
| Ralgps1 | Ralgps1 | 2.18E-85 | 0.952838024 | 0.588 | 0.633 | 4.95E-81 | Oligodendrocyte |
| Gm48678 | Gm48678 | 2.75E-84 | 1.300215399 | 0.492 | 0.443 | 6.25E-80 | Oligodendrocyte |
| Cald1 | Cald1 | 7.57E-84 | 0.664793287 | 0.253 | 0.116 | 1.72E-79 | Oligodendrocyte |
| Dock9 | Dock9 | 1.46E-83 | 1.015212304 | 0.52 | 0.48 | 3.33E-79 | Oligodendrocyte |
| Elf1 | Elf1 | 2.15E-81 | 0.766542277 | 0.253 | 0.119 | 4.87E-77 | Oligodendrocyte |
| Actb | Actb | 3.40E-81 | 0.817056926 | 0.613 | 0.639 | 7.72E-77 | Oligodendrocyte |
| Gm38304 | Gm38304 | 7.02E-81 | 1.032831284 | 0.347 | 0.229 | 1.59E-76 | Oligodendrocyte |
| Usp6nl | Usp6nl | 9.40E-80 | 0.826867445 | 0.266 | 0.135 | 2.14E-75 | Oligodendrocyte |
| Gm37494 | Gm37494 | 4.26E-78 | 0.94287878 | 0.302 | 0.174 | 9.69E-74 | Oligodendrocyte |
| Txndc16 | Txndc16 | 3.58E-77 | 1.004211325 | 0.521 | 0.512 | 8.13E-73 | Oligodendrocyte |
| 8-Mar | 8-Mar | 4.80E-77 | 0.944532999 | 0.304 | 0.179 | 1.09E-72 | Oligodendrocyte |
| Epb41l3 | Epb41l3 | 7.22E-76 | 0.773572845 | 0.616 | 0.643 | 1.64E-71 | Oligodendrocyte |
| Luc7l2 | Luc7l2 | 2.38E-73 | 0.455862869 | 0.854 | 0.936 | 5.41E-69 | Oligodendrocyte |
| Mpp5 | Mpp5 | 3.17E-73 | 0.999637965 | 0.374 | 0.266 | 7.20E-69 | Oligodendrocyte |
| Ispd | Ispd | 9.39E-72 | 1.054246292 | 0.372 | 0.27 | 2.13E-67 | Oligodendrocyte |
| Zfp638 | Zfp638 | 1.32E-71 | 0.770649866 | 0.681 | 0.788 | 2.99E-67 | Oligodendrocyte |
| Gphn | Gphn | 1.34E-71 | 0.377369142 | 0.945 | 0.97 | 3.04E-67 | Oligodendrocyte |
| Apba1 | Apba1 | 8.85E-71 | 0.854348844 | 0.579 | 0.591 | 2.01E-66 | Oligodendrocyte |
| Gm26936 | Gm26936 | 1.35E-70 | 0.731433046 | 0.273 | 0.148 | 3.06E-66 | Oligodendrocyte |
| Samd4 | Samd4 | 4.96E-70 | 1.069404404 | 0.432 | 0.346 | 1.13E-65 | Oligodendrocyte |
| Tmcc2 | Tmcc2 | 1.79E-69 | 0.917715565 | 0.274 | 0.161 | 4.06E-65 | Oligodendrocyte |
| Gnai1 | Gnai1 | 3.50E-68 | 1.035382591 | 0.414 | 0.337 | 7.94E-64 | Oligodendrocyte |
| Sbf1 | Sbf1 | 6.65E-68 | 0.845297503 | 0.253 | 0.14 | 1.51E-63 | Oligodendrocyte |
| Dixdc1 | Dixdc1 | 9.75E-68 | 1.037853471 | 0.404 | 0.329 | 2.21E-63 | Oligodendrocyte |
| Ubb | Ubb | 7.85E-67 | 0.773411513 | 0.592 | 0.617 | 1.78E-62 | Oligodendrocyte |
| Hook3 | Hook3 | 7.89E-66 | 0.943561227 | 0.527 | 0.537 | 1.79E-61 | Oligodendrocyte |
| Oxr1 | Oxr1 | 1.43E-65 | 0.712794645 | 0.626 | 0.612 | 3.24E-61 | Oligodendrocyte |
| Xrcc6 | Xrcc6 | 3.08E-64 | 1.084014668 | 0.379 | 0.299 | 7.01E-60 | Oligodendrocyte |
| Arap2 | Arap2 | 8.26E-64 | 0.927427653 | 0.441 | 0.362 | 1.88E-59 | Oligodendrocyte |
| Vgll4 | Vgll4 | 6.50E-63 | 0.964269086 | 0.395 | 0.305 | 1.48E-58 | Oligodendrocyte |
| Ank | Ank | 2.57E-62 | 0.940324114 | 0.555 | 0.607 | 5.84E-58 | Oligodendrocyte |
| Pik3r1 | Pik3r1 | 2.71E-61 | 0.91517086 | 0.485 | 0.439 | 6.14E-57 | Oligodendrocyte |
| Tmod1 | Tmod1 | 1.10E-60 | 1.1145489 | 0.416 | 0.366 | 2.49E-56 | Oligodendrocyte |
| Il18 | Il18 | 3.07E-60 | 0.723561052 | 0.291 | 0.173 | 6.97E-56 | Oligodendrocyte |
| Arhgap39 | Arhgap39 | 1.57E-57 | 0.923252817 | 0.498 | 0.497 | 3.57E-53 | Oligodendrocyte |
| Elf2 | Elf2 | 4.98E-57 | 0.837850068 | 0.339 | 0.239 | 1.13E-52 | Oligodendrocyte |
| Prkcz | Prkcz | 5.51E-57 | 0.802321459 | 0.544 | 0.597 | 1.25E-52 | Oligodendrocyte |
| Ikzf2 | Ikzf2 | 2.22E-55 | 0.772591854 | 0.264 | 0.155 | 5.04E-51 | Oligodendrocyte |
| Cuedc1 | Cuedc1 | 4.83E-55 | 0.790270543 | 0.31 | 0.205 | 1.10E-50 | Oligodendrocyte |
| Jakmip3 | Jakmip3 | 1.58E-53 | 1.016427011 | 0.412 | 0.377 | 3.58E-49 | Oligodendrocyte |
| Cdk5rap2 | Cdk5rap2 | 3.92E-53 | 0.790744973 | 0.294 | 0.194 | 8.91E-49 | Oligodendrocyte |
| Stard9 | Stard9 | 4.55E-53 | 0.69919189 | 0.27 | 0.162 | 1.03E-48 | Oligodendrocyte |
| Gm28376 | Gm28376 | 1.06E-52 | 1.052586024 | 0.392 | 0.332 | 2.41E-48 | Oligodendrocyte |
| Jph1 | Jph1 | 5.00E-52 | 1.050832412 | 0.375 | 0.316 | 1.14E-47 | Oligodendrocyte |
| Slc38a2 | Slc38a2 | 9.60E-52 | 0.983582674 | 0.338 | 0.257 | 2.18E-47 | Oligodendrocyte |
| Lrrc8b | Lrrc8b | 9.87E-52 | 0.975512386 | 0.386 | 0.329 | 2.24E-47 | Oligodendrocyte |
| Ankrd44 | Ankrd44 | 4.66E-51 | 0.534927862 | 0.312 | 0.198 | 1.06E-46 | Oligodendrocyte |
| Pcp4 | Pcp4 | 1.04E-50 | 0.759296187 | 0.559 | 0.599 | 2.36E-46 | Oligodendrocyte |
| Gng12 | Gng12 | 6.29E-49 | 0.660739481 | 0.274 | 0.168 | 1.43E-44 | Oligodendrocyte |
| Cerk | Cerk | 7.89E-49 | 0.838224074 | 0.263 | 0.168 | 1.79E-44 | Oligodendrocyte |
| Bcas3 | Bcas3 | 8.21E-48 | 0.640161923 | 0.658 | 0.784 | 1.86E-43 | Oligodendrocyte |
| Gm11659 | Gm11659 | 8.81E-48 | 0.853355358 | 0.252 | 0.163 | 2.00E-43 | Oligodendrocyte |
| Bicc1 | Bicc1 | 1.05E-47 | 0.883673592 | 0.29 | 0.198 | 2.39E-43 | Oligodendrocyte |
| Klf7 | Klf7 | 1.58E-47 | 0.78494923 | 0.509 | 0.522 | 3.59E-43 | Oligodendrocyte |
| Wdfy2 | Wdfy2 | 1.94E-46 | 0.761829009 | 0.311 | 0.219 | 4.41E-42 | Oligodendrocyte |
| Ccdc50 | Ccdc50 | 3.61E-46 | 0.826066544 | 0.416 | 0.365 | 8.21E-42 | Oligodendrocyte |
| Inpp5f | Inpp5f | 4.11E-46 | 0.905332221 | 0.471 | 0.487 | 9.34E-42 | Oligodendrocyte |
| Kazn | Kazn | 1.85E-45 | 0.903412239 | 0.442 | 0.436 | 4.20E-41 | Oligodendrocyte |
| Ell2 | Ell2 | 1.96E-45 | 0.874523036 | 0.295 | 0.213 | 4.46E-41 | Oligodendrocyte |
| Fbxl5 | Fbxl5 | 1.20E-44 | 0.925323002 | 0.442 | 0.439 | 2.72E-40 | Oligodendrocyte |
| Secisbp2l | Secisbp2l | 3.07E-44 | 0.917980804 | 0.364 | 0.308 | 6.97E-40 | Oligodendrocyte |
| Adap1 | Adap1 | 3.16E-44 | 0.901133035 | 0.294 | 0.218 | 7.18E-40 | Oligodendrocyte |
| Scamp5 | Scamp5 | 7.82E-44 | 0.895439696 | 0.397 | 0.358 | 1.78E-39 | Oligodendrocyte |
| Ccdc88a | Ccdc88a | 1.69E-43 | 0.445607636 | 0.699 | 0.834 | 3.85E-39 | Oligodendrocyte |
| Arid4b | Arid4b | 3.20E-43 | 0.693998249 | 0.582 | 0.697 | 7.26E-39 | Oligodendrocyte |
| Zfp532 | Zfp532 | 4.44E-41 | 0.74408559 | 0.521 | 0.576 | 1.01E-36 | Oligodendrocyte |
| Pcyt2 | Pcyt2 | 2.46E-40 | 0.971891102 | 0.358 | 0.309 | 5.58E-36 | Oligodendrocyte |
| Fam126a | Fam126a | 2.32E-39 | 0.734645824 | 0.291 | 0.21 | 5.28E-35 | Oligodendrocyte |
| Rasa3 | Rasa3 | 2.78E-39 | 0.718506892 | 0.27 | 0.186 | 6.32E-35 | Oligodendrocyte |
| Serinc5 | Serinc5 | 4.21E-39 | 0.966748744 | 0.346 | 0.297 | 9.56E-35 | Oligodendrocyte |
| Asxl3 | Asxl3 | 5.07E-39 | 0.786008636 | 0.292 | 0.216 | 1.15E-34 | Oligodendrocyte |
| Amph | Amph | 1.22E-38 | 0.784942713 | 0.525 | 0.595 | 2.77E-34 | Oligodendrocyte |
| Mad1l1 | Mad1l1 | 1.24E-38 | 0.81412399 | 0.297 | 0.226 | 2.82E-34 | Oligodendrocyte |
| Ptma | Ptma | 2.36E-38 | 0.732732307 | 0.366 | 0.303 | 5.37E-34 | Oligodendrocyte |
| Ston2 | Ston2 | 1.70E-37 | 0.541954002 | 0.258 | 0.164 | 3.87E-33 | Oligodendrocyte |
| Stk39 | Stk39 | 3.16E-37 | 0.81503753 | 0.469 | 0.497 | 7.18E-33 | Oligodendrocyte |
| Fam208a | Fam208a | 7.31E-37 | 0.788938053 | 0.467 | 0.486 | 1.66E-32 | Oligodendrocyte |
| 4931406P16Rik | 4931406P16Rik | 1.23E-36 | 0.812903113 | 0.311 | 0.247 | 2.79E-32 | Oligodendrocyte |
| Ldlrad3 | Ldlrad3 | 1.38E-36 | 0.697833621 | 0.256 | 0.175 | 3.14E-32 | Oligodendrocyte |
| Cdc42se2 | Cdc42se2 | 4.61E-36 | 0.821926776 | 0.466 | 0.498 | 1.05E-31 | Oligodendrocyte |
| Btbd8 | Btbd8 | 1.01E-35 | 0.787314134 | 0.262 | 0.191 | 2.30E-31 | Oligodendrocyte |
| Gkap1 | Gkap1 | 1.67E-35 | 0.756921435 | 0.312 | 0.243 | 3.79E-31 | Oligodendrocyte |
| Acap2 | Acap2 | 3.18E-34 | 0.54001773 | 0.615 | 0.739 | 7.23E-30 | Oligodendrocyte |
| Ppp1r21 | Ppp1r21 | 3.45E-34 | 0.862904237 | 0.365 | 0.333 | 7.83E-30 | Oligodendrocyte |
| Wdr20 | Wdr20 | 4.05E-34 | 0.852652657 | 0.378 | 0.354 | 9.19E-30 | Oligodendrocyte |
| 2610035D17Rik | 2610035D17Rik | 5.73E-34 | 0.697148764 | 0.411 | 0.371 | 1.30E-29 | Oligodendrocyte |
| Slc20a2 | Slc20a2 | 1.58E-33 | 0.892554908 | 0.338 | 0.295 | 3.58E-29 | Oligodendrocyte |
| Mitf | Mitf | 9.70E-33 | 0.764161538 | 0.382 | 0.34 | 2.20E-28 | Oligodendrocyte |
| Add1 | Add1 | 2.99E-32 | 0.809643878 | 0.502 | 0.579 | 6.79E-28 | Oligodendrocyte |
| Zfand6 | Zfand6 | 4.22E-32 | 0.743049493 | 0.343 | 0.29 | 9.58E-28 | Oligodendrocyte |
| Gm20687 | Gm20687 | 3.09E-31 | 0.879930998 | 0.365 | 0.343 | 7.03E-27 | Oligodendrocyte |
| Glul | Glul | 9.09E-31 | 0.551514928 | 0.275 | 0.194 | 2.07E-26 | Oligodendrocyte |
| Slk | Slk | 3.18E-30 | 0.874276692 | 0.396 | 0.396 | 7.23E-26 | Oligodendrocyte |
| Dnajc6 | Dnajc6 | 4.70E-30 | 0.691109949 | 0.509 | 0.577 | 1.07E-25 | Oligodendrocyte |
| Aig1 | Aig1 | 8.56E-30 | 0.700928477 | 0.544 | 0.647 | 1.94E-25 | Oligodendrocyte |
| Rabgap1l | Rabgap1l | 2.36E-29 | 0.435061064 | 0.726 | 0.847 | 5.35E-25 | Oligodendrocyte |
| Atrn | Atrn | 2.83E-29 | 0.680850129 | 0.521 | 0.63 | 6.43E-25 | Oligodendrocyte |
| Ddx17 | Ddx17 | 3.28E-29 | 0.597504266 | 0.564 | 0.695 | 7.46E-25 | Oligodendrocyte |
| A330015K06Rik1 | A330015K06Rik | 1.04E-28 | 0.639371442 | 0.579 | 0.608 | 2.36E-24 | Oligodendrocyte |
| Snx29 | Snx29 | 3.39E-28 | 0.56632906 | 0.503 | 0.562 | 7.69E-24 | Oligodendrocyte |
| Sh3gl3 | Sh3gl3 | 4.55E-28 | 0.958616071 | 0.388 | 0.397 | 1.03E-23 | Oligodendrocyte |
| Tspan5 | Tspan5 | 7.14E-28 | 0.654118762 | 0.578 | 0.697 | 1.62E-23 | Oligodendrocyte |
| Zfp280c | Zfp280c | 3.48E-27 | 0.813662001 | 0.417 | 0.439 | 7.91E-23 | Oligodendrocyte |
| Tmsb4x | Tmsb4x | 3.67E-27 | 0.569777938 | 0.528 | 0.597 | 8.33E-23 | Oligodendrocyte |
| Fnip2 | Fnip2 | 7.04E-27 | 0.767259308 | 0.338 | 0.302 | 1.60E-22 | Oligodendrocyte |
| Calm2 | Calm2 | 3.14E-26 | 0.428488241 | 0.668 | 0.834 | 7.12E-22 | Oligodendrocyte |
| Rsrp1 | Rsrp1 | 6.84E-26 | 0.561877865 | 0.541 | 0.652 | 1.55E-21 | Oligodendrocyte |
| Vldlr | Vldlr | 1.24E-25 | 0.813500187 | 0.339 | 0.317 | 2.81E-21 | Oligodendrocyte |
| Abl1 | Abl1 | 2.82E-25 | 0.754170014 | 0.39 | 0.391 | 6.41E-21 | Oligodendrocyte |
| Myo18a | Myo18a | 5.48E-25 | 0.812235108 | 0.437 | 0.481 | 1.24E-20 | Oligodendrocyte |
| Slc25a27 | Slc25a27 | 5.72E-25 | 0.8105446 | 0.404 | 0.428 | 1.30E-20 | Oligodendrocyte |
| Cd81 | Cd81 | 2.41E-23 | 0.686315732 | 0.352 | 0.325 | 5.48E-19 | Oligodendrocyte |
| 4930402H24Rik | 4930402H24Rik | 2.94E-23 | 0.284194985 | 0.777 | 0.899 | 6.68E-19 | Oligodendrocyte |
| Mbnl1 | Mbnl1 | 7.81E-23 | 0.439337269 | 0.571 | 0.697 | 1.77E-18 | Oligodendrocyte |
| Atl1 | Atl1 | 9.11E-23 | 0.254420966 | 0.248 | 0.449 | 2.07E-18 | Oligodendrocyte |
| Kdm6a | Kdm6a | 1.26E-22 | 0.773126956 | 0.419 | 0.45 | 2.86E-18 | Oligodendrocyte |
| Lrrc8d | Lrrc8d | 1.28E-22 | 0.763534925 | 0.408 | 0.434 | 2.92E-18 | Oligodendrocyte |
| Mtus1 | Mtus1 | 1.34E-22 | 0.628931066 | 0.256 | 0.201 | 3.05E-18 | Oligodendrocyte |
| Prickle1 | Prickle1 | 2.87E-22 | 0.860630035 | 0.506 | 0.594 | 6.53E-18 | Oligodendrocyte |
| Mfsd6 | Mfsd6 | 7.55E-22 | 0.726391063 | 0.26 | 0.216 | 1.72E-17 | Oligodendrocyte |
| Sirt2 | Sirt2 | 4.54E-21 | 0.704019899 | 0.288 | 0.252 | 1.03E-16 | Oligodendrocyte |
| Atg4c | Atg4c | 4.76E-21 | 0.848869105 | 0.334 | 0.328 | 1.08E-16 | Oligodendrocyte |
| Eef1a1 | Eef1a1 | 5.25E-21 | 0.634179653 | 0.48 | 0.543 | 1.19E-16 | Oligodendrocyte |
| Gm48742 | Gm48742 | 7.53E-21 | 0.610670684 | 0.266 | 0.215 | 1.71E-16 | Oligodendrocyte |
| Thra | Thra | 1.34E-20 | 0.690370086 | 0.49 | 0.597 | 3.05E-16 | Oligodendrocyte |
| Sema4d | Sema4d | 1.39E-20 | 0.634949343 | 0.291 | 0.251 | 3.16E-16 | Oligodendrocyte |
| Elavl3 | Elavl3 | 1.50E-20 | 0.727450191 | 0.463 | 0.544 | 3.42E-16 | Oligodendrocyte |
| Ckb | Ckb | 1.57E-20 | 0.507224768 | 0.574 | 0.716 | 3.57E-16 | Oligodendrocyte |
| Fez1 | Fez1 | 4.42E-20 | 0.767733012 | 0.385 | 0.405 | 1.00E-15 | Oligodendrocyte |
| Arhgef2 | Arhgef2 | 7.24E-20 | 0.777320272 | 0.363 | 0.375 | 1.64E-15 | Oligodendrocyte |
| Ppp1cc | Ppp1cc | 1.29E-19 | 0.895036865 | 0.315 | 0.302 | 2.93E-15 | Oligodendrocyte |
| Synpr | Synpr | 1.32E-19 | 1.17760553 | 0.451 | 0.519 | 3.01E-15 | Oligodendrocyte |
| Micu2 | Micu2 | 1.47E-18 | 0.263483276 | 0.245 | 0.43 | 3.33E-14 | Oligodendrocyte |
| Hspa8 | Hspa8 | 9.17E-18 | 0.658288623 | 0.406 | 0.43 | 2.08E-13 | Oligodendrocyte |
| Itm2b | Itm2b | 1.52E-17 | 0.61854281 | 0.454 | 0.509 | 3.45E-13 | Oligodendrocyte |
| Gpr88 | Gpr88 | 1.52E-17 | 0.620600087 | 0.491 | 0.581 | 3.46E-13 | Oligodendrocyte |
| Mapre3 | Mapre3 | 2.76E-17 | 0.252874689 | 0.269 | 0.468 | 6.27E-13 | Oligodendrocyte |
| Mink1 | Mink1 | 6.18E-17 | 0.729077603 | 0.419 | 0.487 | 1.40E-12 | Oligodendrocyte |
| Tra2b | Tra2b | 1.30E-16 | 0.259787525 | 0.273 | 0.467 | 2.96E-12 | Oligodendrocyte |
| Cpd | Cpd | 1.87E-16 | 0.752212937 | 0.338 | 0.341 | 4.25E-12 | Oligodendrocyte |
| Pde7a | Pde7a | 2.69E-16 | 0.265244472 | 0.24 | 0.41 | 6.12E-12 | Oligodendrocyte |
| Brdt | Brdt | 4.42E-16 | 0.255267782 | 0.17 | 0.295 | 1.00E-11 | Oligodendrocyte |
| Otud7a1 | Otud7a | 5.83E-16 | 0.52029854 | 0.607 | 0.748 | 1.32E-11 | Oligodendrocyte |
| Efcab14 | Efcab14 | 7.80E-16 | 0.732522597 | 0.308 | 0.298 | 1.77E-11 | Oligodendrocyte |
| Rab6a | Rab6a | 2.00E-15 | 0.261371091 | 0.246 | 0.416 | 4.54E-11 | Oligodendrocyte |
| AU040320 | AU040320 | 2.39E-15 | 0.267785301 | 0.238 | 0.402 | 5.43E-11 | Oligodendrocyte |
| Ncald | Ncald | 2.73E-15 | 0.442268533 | 0.32 | 0.283 | 6.21E-11 | Oligodendrocyte |
| Ephb1 | Ephb1 | 5.80E-15 | 0.480580854 | 0.593 | 0.699 | 1.32E-10 | Oligodendrocyte |
| Ino80d | Ino80d | 5.90E-15 | 0.25716266 | 0.248 | 0.415 | 1.34E-10 | Oligodendrocyte |
| Swt1 | Swt1 | 6.31E-15 | 0.280692662 | 0.212 | 0.356 | 1.43E-10 | Oligodendrocyte |
| Dicer1 | Dicer1 | 8.73E-15 | 0.268244808 | 0.229 | 0.384 | 1.98E-10 | Oligodendrocyte |
| Tbcd | Tbcd | 9.07E-15 | 0.796913874 | 0.39 | 0.439 | 2.06E-10 | Oligodendrocyte |
| Gm36975 | Gm36975 | 1.29E-14 | 0.333377955 | 0.262 | 0.444 | 2.94E-10 | Oligodendrocyte |
| Strn4 | Strn4 | 1.61E-14 | 0.252641563 | 0.192 | 0.326 | 3.67E-10 | Oligodendrocyte |
| Smc5 | Smc5 | 1.91E-14 | 0.256918417 | 0.232 | 0.386 | 4.34E-10 | Oligodendrocyte |
| Gm26694 | Gm26694 | 1.95E-14 | 0.640359594 | 0.478 | 0.598 | 4.44E-10 | Oligodendrocyte |
| Stx5a | Stx5a | 1.96E-14 | 0.26717236 | 0.239 | 0.401 | 4.45E-10 | Oligodendrocyte |
| Herc4 | Herc4 | 2.88E-14 | 0.659650122 | 0.398 | 0.444 | 6.53E-10 | Oligodendrocyte |
| Mtss1 | Mtss1 | 3.02E-14 | 0.563902157 | 0.296 | 0.268 | 6.86E-10 | Oligodendrocyte |
| Elp4 | Elp4 | 5.03E-14 | 0.255671928 | 0.342 | 0.57 | 1.14E-09 | Oligodendrocyte |
| Kcnq31 | Kcnq3 | 5.63E-14 | 0.27197576 | 0.82 | 0.823 | 1.28E-09 | Oligodendrocyte |
| Grina | Grina | 7.30E-14 | 0.27409441 | 0.251 | 0.416 | 1.66E-09 | Oligodendrocyte |
| Usp25 | Usp25 | 1.02E-13 | 0.66128371 | 0.311 | 0.306 | 2.33E-09 | Oligodendrocyte |
| Tom1l2 | Tom1l2 | 1.03E-13 | 0.597693123 | 0.511 | 0.664 | 2.34E-09 | Oligodendrocyte |
| Tada2a | Tada2a | 1.22E-13 | 0.260845559 | 0.178 | 0.299 | 2.78E-09 | Oligodendrocyte |
| Upf3b | Upf3b | 1.34E-13 | 0.270146541 | 0.201 | 0.334 | 3.04E-09 | Oligodendrocyte |
| Nceh1 | Nceh1 | 1.75E-13 | 0.252080564 | 0.185 | 0.307 | 3.97E-09 | Oligodendrocyte |
| Tmem117 | Tmem117 | 2.21E-13 | 0.990612021 | 0.401 | 0.474 | 5.02E-09 | Oligodendrocyte |
| Pura | Pura | 2.36E-13 | 0.259774803 | 0.302 | 0.505 | 5.37E-09 | Oligodendrocyte |
| Elovl5 | Elovl5 | 2.60E-13 | 0.253059009 | 0.166 | 0.276 | 5.92E-09 | Oligodendrocyte |
| Usp31 | Usp31 | 3.65E-13 | 0.854712665 | 0.279 | 0.272 | 8.29E-09 | Oligodendrocyte |
| Mpzl1 | Mpzl1 | 4.43E-13 | 0.587948439 | 0.262 | 0.238 | 1.01E-08 | Oligodendrocyte |
| Tspan3 | Tspan3 | 4.55E-13 | 0.262050608 | 0.219 | 0.358 | 1.03E-08 | Oligodendrocyte |
| Matr3 | Matr3 | 7.32E-13 | 0.263186789 | 0.322 | 0.537 | 1.66E-08 | Oligodendrocyte |
| Ube2e3 | Ube2e3 | 8.16E-13 | 0.257504961 | 0.186 | 0.304 | 1.85E-08 | Oligodendrocyte |
| Pdcd6ip | Pdcd6ip | 8.56E-13 | 0.630907666 | 0.263 | 0.244 | 1.94E-08 | Oligodendrocyte |
| Atp6v1a | Atp6v1a | 9.64E-13 | 0.302732892 | 0.253 | 0.417 | 2.19E-08 | Oligodendrocyte |
| Ccdc66 | Ccdc66 | 1.05E-12 | 0.30033779 | 0.202 | 0.333 | 2.38E-08 | Oligodendrocyte |
| Rab11fip4 | Rab11fip4 | 1.44E-12 | 0.318152581 | 0.232 | 0.386 | 3.27E-08 | Oligodendrocyte |
| Plekhm2 | Plekhm2 | 1.58E-12 | 0.263668127 | 0.21 | 0.341 | 3.60E-08 | Oligodendrocyte |
| Dstyk | Dstyk | 1.75E-12 | 0.286356723 | 0.275 | 0.455 | 3.97E-08 | Oligodendrocyte |
| Arnt | Arnt | 1.83E-12 | 0.277174255 | 0.282 | 0.467 | 4.16E-08 | Oligodendrocyte |
| Rps6kb1 | Rps6kb1 | 1.85E-12 | 0.258704239 | 0.305 | 0.502 | 4.21E-08 | Oligodendrocyte |
| Capn15 | Capn15 | 2.34E-12 | 0.284420674 | 0.213 | 0.35 | 5.31E-08 | Oligodendrocyte |
| Add3 | Add3 | 3.10E-12 | 0.634524166 | 0.41 | 0.464 | 7.04E-08 | Oligodendrocyte |
| Hip1 | Hip1 | 4.12E-12 | 0.577863877 | 0.38 | 0.41 | 9.36E-08 | Oligodendrocyte |
| U2surp | U2surp | 4.44E-12 | 0.307047487 | 0.279 | 0.461 | 1.01E-07 | Oligodendrocyte |
| Dcaf8 | Dcaf8 | 4.74E-12 | 0.258526148 | 0.261 | 0.424 | 1.08E-07 | Oligodendrocyte |
| Pigu | Pigu | 5.39E-12 | 0.289407027 | 0.188 | 0.306 | 1.22E-07 | Oligodendrocyte |
| Cst3 | Cst3 | 6.61E-12 | 0.403751336 | 0.506 | 0.582 | 1.50E-07 | Oligodendrocyte |
| Tmem245 | Tmem245 | 9.00E-12 | 0.250459956 | 0.209 | 0.333 | 2.04E-07 | Oligodendrocyte |
| Atp5b | Atp5b | 1.05E-11 | 0.263558665 | 0.232 | 0.37 | 2.38E-07 | Oligodendrocyte |
| St3gal3 | St3gal3 | 1.11E-11 | 0.714830879 | 0.396 | 0.463 | 2.53E-07 | Oligodendrocyte |
| Eml1 | Eml1 | 1.26E-11 | 0.859467027 | 0.381 | 0.444 | 2.87E-07 | Oligodendrocyte |
| Flnb | Flnb | 2.09E-11 | 0.320361442 | 0.305 | 0.503 | 4.74E-07 | Oligodendrocyte |
| Cdc73 | Cdc73 | 2.53E-11 | 0.25415878 | 0.293 | 0.475 | 5.74E-07 | Oligodendrocyte |
| Atp6v1e1 | Atp6v1e1 | 7.40E-11 | 0.263410741 | 0.185 | 0.294 | 1.68E-06 | Oligodendrocyte |
| Ap3m1 | Ap3m1 | 7.76E-11 | 0.261899804 | 0.177 | 0.284 | 1.76E-06 | Oligodendrocyte |
| Aebp2 | Aebp2 | 8.26E-11 | 0.695290855 | 0.329 | 0.353 | 1.88E-06 | Oligodendrocyte |
| Auh | Auh | 8.28E-11 | 0.268316611 | 0.186 | 0.297 | 1.88E-06 | Oligodendrocyte |
| Phc3 | Phc3 | 8.46E-11 | 0.254253204 | 0.312 | 0.507 | 1.92E-06 | Oligodendrocyte |
| Lonp2 | Lonp2 | 1.02E-10 | 0.255311902 | 0.311 | 0.5 | 2.32E-06 | Oligodendrocyte |
| Pum2 | Pum2 | 1.05E-10 | 0.256181922 | 0.337 | 0.549 | 2.39E-06 | Oligodendrocyte |
| Vcp | Vcp | 1.13E-10 | 0.27062009 | 0.194 | 0.309 | 2.56E-06 | Oligodendrocyte |
| Ube2d3 | Ube2d3 | 1.14E-10 | 0.254812004 | 0.305 | 0.494 | 2.58E-06 | Oligodendrocyte |
| Sub1 | Sub1 | 1.39E-10 | 0.284399284 | 0.19 | 0.301 | 3.15E-06 | Oligodendrocyte |
| Cnot6 | Cnot6 | 1.59E-10 | 0.271815788 | 0.271 | 0.427 | 3.60E-06 | Oligodendrocyte |
| Agps | Agps | 1.59E-10 | 0.259695106 | 0.243 | 0.383 | 3.60E-06 | Oligodendrocyte |
| Cpsf7 | Cpsf7 | 1.61E-10 | 0.293279532 | 0.241 | 0.387 | 3.65E-06 | Oligodendrocyte |
| Slc16a7 | Slc16a7 | 1.71E-10 | 0.3360366 | 0.272 | 0.441 | 3.89E-06 | Oligodendrocyte |
| Mvb12b | Mvb12b | 1.81E-10 | 0.274721338 | 0.262 | 0.417 | 4.12E-06 | Oligodendrocyte |
| Clk1 | Clk1 | 1.94E-10 | 0.282985328 | 0.323 | 0.527 | 4.42E-06 | Oligodendrocyte |
| Trim24 | Trim24 | 2.40E-10 | 0.27730484 | 0.198 | 0.312 | 5.45E-06 | Oligodendrocyte |
| Atp5f1 | Atp5f1 | 2.56E-10 | 0.297637325 | 0.214 | 0.339 | 5.80E-06 | Oligodendrocyte |
| Immp1l | Immp1l | 2.65E-10 | 0.305286141 | 0.3 | 0.486 | 6.02E-06 | Oligodendrocyte |
| Prkar1a | Prkar1a | 2.93E-10 | 0.271628615 | 0.238 | 0.376 | 6.65E-06 | Oligodendrocyte |
| Lrig2 | Lrig2 | 3.00E-10 | 0.285997543 | 0.293 | 0.473 | 6.80E-06 | Oligodendrocyte |
| Slc32a1 | Slc32a1 | 4.03E-10 | 0.288123108 | 0.191 | 0.3 | 9.16E-06 | Oligodendrocyte |
| Osbp | Osbp | 4.90E-10 | 0.325653464 | 0.214 | 0.343 | 1.11E-05 | Oligodendrocyte |
| Npat | Npat | 5.02E-10 | 0.696268767 | 0.276 | 0.277 | 1.14E-05 | Oligodendrocyte |
| Stx6 | Stx6 | 5.35E-10 | 0.320937647 | 0.235 | 0.375 | 1.21E-05 | Oligodendrocyte |
| Lrrfip2 | Lrrfip2 | 6.40E-10 | 0.266186309 | 0.19 | 0.3 | 1.45E-05 | Oligodendrocyte |
| Ppm1a | Ppm1a | 6.59E-10 | 0.288863518 | 0.257 | 0.408 | 1.50E-05 | Oligodendrocyte |
| Ccnl2 | Ccnl2 | 7.07E-10 | 0.261081692 | 0.298 | 0.475 | 1.61E-05 | Oligodendrocyte |
| Ppm1b | Ppm1b | 9.52E-10 | 0.312321551 | 0.266 | 0.423 | 2.16E-05 | Oligodendrocyte |
| Emc7 | Emc7 | 1.14E-09 | 0.27564081 | 0.163 | 0.256 | 2.60E-05 | Oligodendrocyte |
| Eif2s3y | Eif2s3y | 1.17E-09 | 0.286876335 | 0.32 | 0.521 | 2.66E-05 | Oligodendrocyte |
| Pvt1 | Pvt1 | 1.21E-09 | 0.400678327 | 0.247 | 0.391 | 2.74E-05 | Oligodendrocyte |
| Ufl1 | Ufl1 | 1.34E-09 | 0.255462762 | 0.162 | 0.252 | 3.04E-05 | Oligodendrocyte |
| 4732471J01Rik | 4732471J01Rik | 1.52E-09 | 0.289347944 | 0.281 | 0.442 | 3.45E-05 | Oligodendrocyte |
| Kif3c | Kif3c | 1.53E-09 | 0.33469163 | 0.256 | 0.411 | 3.47E-05 | Oligodendrocyte |
| Trpc1 | Trpc1 | 1.54E-09 | 0.351688448 | 0.296 | 0.479 | 3.50E-05 | Oligodendrocyte |
| Dync1h1 | Dync1h1 | 1.57E-09 | 0.307997701 | 0.286 | 0.455 | 3.57E-05 | Oligodendrocyte |
| Spock11 | Spock1 | 1.89E-09 | 0.353699054 | 0.419 | 0.644 | 4.28E-05 | Oligodendrocyte |
| Rab10 | Rab10 | 1.96E-09 | 0.601956938 | 0.471 | 0.6 | 4.46E-05 | Oligodendrocyte |
| Rb1 | Rb1 | 2.03E-09 | 0.555995887 | 0.389 | 0.432 | 4.61E-05 | Oligodendrocyte |
| Atf7ip | Atf7ip | 2.05E-09 | 0.600386962 | 0.424 | 0.509 | 4.66E-05 | Oligodendrocyte |
| Parn | Parn | 2.32E-09 | 0.300742369 | 0.198 | 0.31 | 5.27E-05 | Oligodendrocyte |
| Kpna4 | Kpna4 | 2.54E-09 | 0.300660508 | 0.302 | 0.478 | 5.78E-05 | Oligodendrocyte |
| Zranb1 | Zranb1 | 2.57E-09 | 0.293196026 | 0.308 | 0.494 | 5.84E-05 | Oligodendrocyte |
| Rassf8 | Rassf8 | 2.69E-09 | 0.310422737 | 0.281 | 0.446 | 6.12E-05 | Oligodendrocyte |
| Trim35 | Trim35 | 2.96E-09 | 0.682476085 | 0.408 | 0.504 | 6.71E-05 | Oligodendrocyte |
| Lrch3 | Lrch3 | 3.14E-09 | 0.589145122 | 0.441 | 0.541 | 7.13E-05 | Oligodendrocyte |
| 9030624J02Rik | 9030624J02Rik | 3.15E-09 | 0.298518971 | 0.25 | 0.392 | 7.14E-05 | Oligodendrocyte |
| Slc38a6 | Slc38a6 | 3.23E-09 | 0.288378724 | 0.178 | 0.277 | 7.34E-05 | Oligodendrocyte |
| Sort1 | Sort1 | 3.24E-09 | 0.6545623 | 0.407 | 0.49 | 7.35E-05 | Oligodendrocyte |
| Calm1 | Calm1 | 3.29E-09 | 0.507364627 | 0.505 | 0.649 | 7.46E-05 | Oligodendrocyte |
| Cep350 | Cep350 | 3.84E-09 | 0.251546795 | 0.324 | 0.518 | 8.71E-05 | Oligodendrocyte |
| Paip2 | Paip2 | 4.05E-09 | 0.589346866 | 0.436 | 0.549 | 9.21E-05 | Oligodendrocyte |
| Arf1 | Arf1 | 4.19E-09 | 0.25449328 | 0.174 | 0.267 | 9.52E-05 | Oligodendrocyte |
| Eml2 | Eml2 | 5.07E-09 | 0.689751346 | 0.283 | 0.296 | 0.000115262 | Oligodendrocyte |
| Park2 | Park2 | 5.18E-09 | 0.279497726 | 0.774 | 0.89 | 0.000117701 | Oligodendrocyte |
| Ppp2r2a | Ppp2r2a | 7.20E-09 | 0.468643325 | 0.519 | 0.663 | 0.000163424 | Oligodendrocyte |
| Metap1d | Metap1d | 1.02E-08 | 0.60504738 | 0.315 | 0.333 | 0.000231266 | Oligodendrocyte |
| Atp11a | Atp11a | 1.65E-08 | 0.667900676 | 0.319 | 0.352 | 0.000374683 | Oligodendrocyte |
| Ythdc1 | Ythdc1 | 1.86E-08 | 0.267194485 | 0.174 | 0.267 | 0.000421732 | Oligodendrocyte |
| Cblb | Cblb | 1.95E-08 | 0.268570484 | 0.226 | 0.343 | 0.000443378 | Oligodendrocyte |
| Atp1b3 | Atp1b3 | 2.48E-08 | 0.380434089 | 0.246 | 0.387 | 0.000563669 | Oligodendrocyte |
| Dnajc19 | Dnajc19 | 2.67E-08 | 0.292359224 | 0.184 | 0.28 | 0.00060563 | Oligodendrocyte |
| Gm26561 | Gm26561 | 2.95E-08 | 0.274158365 | 0.194 | 0.295 | 0.000670182 | Oligodendrocyte |
| Wdr26 | Wdr26 | 3.11E-08 | 0.268005166 | 0.318 | 0.502 | 0.000706517 | Oligodendrocyte |
| Atp1b1 | Atp1b1 | 3.19E-08 | 0.378039182 | 0.579 | 0.778 | 0.000725099 | Oligodendrocyte |
| Clk4 | Clk4 | 3.37E-08 | 0.342169773 | 0.267 | 0.421 | 0.000765255 | Oligodendrocyte |
| Mau2 | Mau2 | 3.38E-08 | 0.316766633 | 0.224 | 0.344 | 0.000768367 | Oligodendrocyte |
| Sel1l | Sel1l | 4.51E-08 | 0.332278707 | 0.239 | 0.371 | 0.001024551 | Oligodendrocyte |
| Reep5 | Reep5 | 4.58E-08 | 0.581946354 | 0.273 | 0.274 | 0.001039599 | Oligodendrocyte |
| Tsc1 | Tsc1 | 5.22E-08 | 0.334255569 | 0.29 | 0.46 | 0.00118545 | Oligodendrocyte |
| Phf3 | Phf3 | 5.84E-08 | 0.268287595 | 0.378 | 0.609 | 0.001327048 | Oligodendrocyte |
| Fsd1l | Fsd1l | 6.61E-08 | 0.667725122 | 0.265 | 0.269 | 0.001501543 | Oligodendrocyte |
| Ppip5k2 | Ppip5k2 | 7.20E-08 | 0.384119919 | 0.241 | 0.375 | 0.001635083 | Oligodendrocyte |
| Tecr | Tecr | 9.74E-08 | 0.284842624 | 0.277 | 0.426 | 0.002211866 | Oligodendrocyte |
| Kmt5b | Kmt5b | 9.97E-08 | 0.280261317 | 0.296 | 0.46 | 0.002264611 | Oligodendrocyte |
| Nr3c1 | Nr3c1 | 1.10E-07 | 0.596079165 | 0.383 | 0.444 | 0.002506806 | Oligodendrocyte |
| Rictor | Rictor | 1.33E-07 | 0.291081013 | 0.334 | 0.531 | 0.003013971 | Oligodendrocyte |
| Pebp1 | Pebp1 | 1.34E-07 | 0.324978709 | 0.217 | 0.328 | 0.003044481 | Oligodendrocyte |
| Gnb4 | Gnb4 | 1.38E-07 | 0.28934518 | 0.167 | 0.251 | 0.003137221 | Oligodendrocyte |
| Immt | Immt | 1.39E-07 | 0.337432618 | 0.218 | 0.332 | 0.003156461 | Oligodendrocyte |
| Ppia | Ppia | 1.54E-07 | 0.555411242 | 0.344 | 0.377 | 0.003502758 | Oligodendrocyte |
| AI593442 | AI593442 | 1.80E-07 | 0.295801686 | 0.194 | 0.292 | 0.004085524 | Oligodendrocyte |
| Mgrn1 | Mgrn1 | 1.81E-07 | 0.331283875 | 0.252 | 0.388 | 0.004103786 | Oligodendrocyte |
| B3galt5 | B3galt5 | 2.67E-07 | 0.368711977 | 0.216 | 0.331 | 0.006069689 | Oligodendrocyte |
| Uchl1 | Uchl1 | 3.22E-07 | 0.324709857 | 0.237 | 0.359 | 0.007324896 | Oligodendrocyte |
| Wdr89 | Wdr89 | 4.16E-07 | 0.305048525 | 0.185 | 0.275 | 0.009439802 | Oligodendrocyte |
| Igsf11 | Igsf11 | 5.02E-07 | 0.296388644 | 0.28 | 0.424 | 0.011401321 | Oligodendrocyte |
| Zfp445 | Zfp445 | 5.07E-07 | 0.325817982 | 0.31 | 0.487 | 0.011505695 | Oligodendrocyte |
| Gpbp1l1 | Gpbp1l1 | 5.82E-07 | 0.262361457 | 0.172 | 0.255 | 0.013219478 | Oligodendrocyte |
| Zfp608 | Zfp608 | 6.10E-07 | 0.323614719 | 0.408 | 0.427 | 0.013844373 | Oligodendrocyte |
| Dis3l2 | Dis3l2 | 6.30E-07 | 0.495743029 | 0.511 | 0.692 | 0.01429867 | Oligodendrocyte |
| Jak2 | Jak2 | 6.36E-07 | 0.364494052 | 0.297 | 0.462 | 0.014436832 | Oligodendrocyte |
| Rheb | Rheb | 6.90E-07 | 0.284948316 | 0.204 | 0.301 | 0.015675363 | Oligodendrocyte |
| Rufy1 | Rufy1 | 7.03E-07 | 0.321680265 | 0.214 | 0.322 | 0.015971724 | Oligodendrocyte |
| Xiap | Xiap | 7.25E-07 | 0.261751497 | 0.236 | 0.349 | 0.016470765 | Oligodendrocyte |
| Invs | Invs | 9.70E-07 | 0.337062591 | 0.177 | 0.261 | 0.022033945 | Oligodendrocyte |
| Ptpra | Ptpra | 1.56E-06 | 0.472090312 | 0.46 | 0.583 | 0.035468253 | Oligodendrocyte |
| Arpc1a | Arpc1a | 1.57E-06 | 0.342566725 | 0.3 | 0.464 | 0.035769963 | Oligodendrocyte |
| Fcho2 | Fcho2 | 1.80E-06 | 0.259573964 | 0.354 | 0.542 | 0.040975925 | Oligodendrocyte |
| Ankrd13a | Ankrd13a | 1.86E-06 | 0.356896261 | 0.204 | 0.307 | 0.042142627 | Oligodendrocyte |
| Serinc1 | Serinc1 | 2.13E-06 | 0.52047403 | 0.443 | 0.557 | 0.048273161 | Oligodendrocyte |
| Pxk | Pxk | 2.15E-06 | 0.345653891 | 0.206 | 0.308 | 0.048770159 | Oligodendrocyte |
| Arl8b | Arl8b | 2.72E-06 | 0.297418864 | 0.182 | 0.267 | 0.061850215 | Oligodendrocyte |
| Pkd2 | Pkd2 | 2.83E-06 | 0.324437619 | 0.247 | 0.368 | 0.064310193 | Oligodendrocyte |
| Pkm | Pkm | 3.12E-06 | 0.586431396 | 0.379 | 0.451 | 0.070837863 | Oligodendrocyte |
| Actg1 | Actg1 | 3.20E-06 | 0.573325082 | 0.309 | 0.333 | 0.072766859 | Oligodendrocyte |
| Gtdc1 | Gtdc1 | 3.59E-06 | 0.359432703 | 0.358 | 0.551 | 0.081500314 | Oligodendrocyte |
| Emc10 | Emc10 | 3.64E-06 | 0.340276068 | 0.184 | 0.269 | 0.08260384 | Oligodendrocyte |
| Ube2d2a | Ube2d2a | 3.74E-06 | 0.332722706 | 0.299 | 0.457 | 0.084988064 | Oligodendrocyte |
| Fam13c | Fam13c | 3.95E-06 | 0.649306192 | 0.357 | 0.41 | 0.089638511 | Oligodendrocyte |
| Arih1 | Arih1 | 4.07E-06 | 0.399376685 | 0.561 | 0.766 | 0.092470375 | Oligodendrocyte |
| Rab21 | Rab21 | 4.63E-06 | 0.286391833 | 0.174 | 0.253 | 0.105119339 | Oligodendrocyte |
| Chn2 | Chn2 | 5.63E-06 | 0.335428631 | 0.359 | 0.38 | 0.127912632 | Oligodendrocyte |
| Hnrnpa3 | Hnrnpa3 | 6.02E-06 | 0.28690328 | 0.235 | 0.342 | 0.136715733 | Oligodendrocyte |
| Eif4g1 | Eif4g1 | 6.52E-06 | 0.307857839 | 0.271 | 0.404 | 0.148146783 | Oligodendrocyte |
| Cdk5r1 | Cdk5r1 | 6.54E-06 | 0.341878009 | 0.192 | 0.281 | 0.148615715 | Oligodendrocyte |
| Inf2 | Inf2 | 7.91E-06 | 0.330342758 | 0.297 | 0.448 | 0.179684969 | Oligodendrocyte |
| Maged1 | Maged1 | 8.02E-06 | 0.312376422 | 0.185 | 0.268 | 0.182158118 | Oligodendrocyte |
| Nrgn | Nrgn | 8.03E-06 | 0.331028525 | 0.297 | 0.448 | 0.182486442 | Oligodendrocyte |
| Rps27rt | Rps27rt | 8.66E-06 | 0.282077815 | 0.182 | 0.263 | 0.196677643 | Oligodendrocyte |
| Ywhab | Ywhab | 1.02E-05 | 0.295682153 | 0.233 | 0.338 | 0.230573231 | Oligodendrocyte |
| Krit1 | Krit1 | 1.10E-05 | 0.550330282 | 0.468 | 0.634 | 0.249045607 | Oligodendrocyte |
| Eif1 | Eif1 | 1.22E-05 | 0.31982987 | 0.215 | 0.311 | 0.277798239 | Oligodendrocyte |
| Iqsec11 | Iqsec1 | 1.24E-05 | 0.457765777 | 0.522 | 0.672 | 0.282401445 | Oligodendrocyte |
| Atp1a1 | Atp1a1 | 1.43E-05 | 0.344325314 | 0.232 | 0.339 | 0.325151045 | Oligodendrocyte |
| Chp1 | Chp1 | 1.61E-05 | 0.351810005 | 0.187 | 0.272 | 0.364723208 | Oligodendrocyte |
| Zzz3 | Zzz3 | 1.84E-05 | 0.368433239 | 0.281 | 0.425 | 0.417971385 | Oligodendrocyte |
| Thy1 | Thy1 | 1.85E-05 | 0.341597993 | 0.203 | 0.294 | 0.420036744 | Oligodendrocyte |
| Rab2a | Rab2a | 1.94E-05 | 0.317549138 | 0.359 | 0.558 | 0.440171467 | Oligodendrocyte |
| Elovl6 | Elovl6 | 2.21E-05 | 0.391666944 | 0.265 | 0.395 | 0.501194181 | Oligodendrocyte |
| Sec62 | Sec62 | 2.24E-05 | 0.355767736 | 0.256 | 0.379 | 0.509355978 | Oligodendrocyte |
| Rybp | Rybp | 2.34E-05 | 0.660272403 | 0.289 | 0.32 | 0.532113904 | Oligodendrocyte |
| Tex2 | Tex2 | 2.77E-05 | 0.622806502 | 0.278 | 0.303 | 0.628772284 | Oligodendrocyte |
| Ube2g1 | Ube2g1 | 3.48E-05 | 0.354727025 | 0.357 | 0.551 | 0.789443235 | Oligodendrocyte |
| Acot7 | Acot7 | 3.78E-05 | 0.597642533 | 0.254 | 0.27 | 0.857595002 | Oligodendrocyte |
| Rnf130 | Rnf130 | 3.82E-05 | 0.586794555 | 0.346 | 0.405 | 0.866961611 | Oligodendrocyte |
| Ubr1 | Ubr1 | 4.04E-05 | 0.308431989 | 0.348 | 0.535 | 0.917682673 | Oligodendrocyte |
| Hnrnpk | Hnrnpk | 4.53E-05 | 0.304000256 | 0.25 | 0.361 | 1 | Oligodendrocyte |
| Acsl1 | Acsl1 | 5.35E-05 | 0.388694292 | 0.207 | 0.3 | 1 | Oligodendrocyte |
| Fam13b | Fam13b | 5.80E-05 | 0.320279475 | 0.292 | 0.431 | 1 | Oligodendrocyte |
| Selenow | Selenow | 5.90E-05 | 0.363503564 | 0.261 | 0.38 | 1 | Oligodendrocyte |
| Retreg3 | Retreg3 | 6.24E-05 | 0.579133836 | 0.248 | 0.263 | 1 | Oligodendrocyte |
| Psap | Psap | 6.61E-05 | 0.508498873 | 0.46 | 0.604 | 1 | Oligodendrocyte |
| Bicra | Bicra | 6.87E-05 | 0.326173698 | 0.249 | 0.359 | 1 | Oligodendrocyte |
| Zfp704 | Zfp704 | 7.18E-05 | 0.413252364 | 0.405 | 0.503 | 1 | Oligodendrocyte |
| Otulin | Otulin | 7.65E-05 | 0.358917171 | 0.196 | 0.281 | 1 | Oligodendrocyte |
| Prkacb | Prkacb | 8.07E-05 | 0.523900875 | 0.454 | 0.604 | 1 | Oligodendrocyte |
| Atp6ap2 | Atp6ap2 | 8.17E-05 | 0.365720291 | 0.232 | 0.336 | 1 | Oligodendrocyte |
| Apc | Apc | 9.77E-05 | 0.264935024 | 0.637 | 0.838 | 1 | Oligodendrocyte |
| Zmat1 | Zmat1 | 0.000116106 | 0.373886639 | 0.212 | 0.308 | 1 | Oligodendrocyte |
| E330009J07Rik | E330009J07Rik | 0.000131772 | 0.357956827 | 0.191 | 0.274 | 1 | Oligodendrocyte |
| Zfp365 | Zfp365 | 0.000138404 | 0.375651553 | 0.18 | 0.256 | 1 | Oligodendrocyte |
| Itfg1 | Itfg1 | 0.000146417 | 0.291331563 | 0.423 | 0.658 | 1 | Oligodendrocyte |
| Rif1 | Rif1 | 0.000150077 | 0.521217538 | 0.265 | 0.283 | 1 | Oligodendrocyte |
| Mon2 | Mon2 | 0.00015233 | 0.342193648 | 0.296 | 0.439 | 1 | Oligodendrocyte |
| Glt8d1 | Glt8d1 | 0.000152776 | 0.338202938 | 0.191 | 0.271 | 1 | Oligodendrocyte |
| Ncoa6 | Ncoa6 | 0.00016839 | 0.35538661 | 0.311 | 0.468 | 1 | Oligodendrocyte |
| Lin52 | Lin52 | 0.00019805 | 0.382704177 | 0.262 | 0.378 | 1 | Oligodendrocyte |
| Hnrnpdl | Hnrnpdl | 0.00021556 | 0.365815809 | 0.317 | 0.478 | 1 | Oligodendrocyte |
| Tfdp2 | Tfdp2 | 0.000216624 | 0.31837857 | 0.37 | 0.564 | 1 | Oligodendrocyte |
| Fxr1 | Fxr1 | 0.000216895 | 0.368771386 | 0.333 | 0.506 | 1 | Oligodendrocyte |
| Cog5 | Cog5 | 0.000226554 | 0.250776723 | 0.436 | 0.679 | 1 | Oligodendrocyte |
| Tmem59 | Tmem59 | 0.000245154 | 0.367175433 | 0.274 | 0.398 | 1 | Oligodendrocyte |
| Camkmt | Camkmt | 0.000257155 | 0.384273177 | 0.385 | 0.586 | 1 | Oligodendrocyte |
| Trpc4ap | Trpc4ap | 0.000259192 | 0.370431237 | 0.256 | 0.371 | 1 | Oligodendrocyte |
| Tmem126a | Tmem126a | 0.000259585 | 0.356634712 | 0.19 | 0.268 | 1 | Oligodendrocyte |
| Rsu1 | Rsu1 | 0.000285183 | 0.329176449 | 0.195 | 0.272 | 1 | Oligodendrocyte |
| Nsg1 | Nsg1 | 0.000291901 | 0.374818731 | 0.255 | 0.367 | 1 | Oligodendrocyte |
| Dusp11 | Dusp11 | 0.000293455 | 0.367108922 | 0.226 | 0.323 | 1 | Oligodendrocyte |
| Ywhaz | Ywhaz | 0.000296348 | 0.267629912 | 0.436 | 0.672 | 1 | Oligodendrocyte |
| Fam171b | Fam171b | 0.000306835 | 0.284087971 | 0.385 | 0.584 | 1 | Oligodendrocyte |
| Srsf3 | Srsf3 | 0.000317822 | 0.303321278 | 0.22 | 0.306 | 1 | Oligodendrocyte |
| Rps6ka5 | Rps6ka5 | 0.000354671 | 0.348847648 | 0.521 | 0.655 | 1 | Oligodendrocyte |
| Psd3 | Psd3 | 0.000376201 | 0.354018679 | 0.575 | 0.776 | 1 | Oligodendrocyte |
| Creb1 | Creb1 | 0.000396735 | 0.315661787 | 0.28 | 0.398 | 1 | Oligodendrocyte |
| Hsp90ab1 | Hsp90ab1 | 0.00042098 | 0.550451573 | 0.336 | 0.396 | 1 | Oligodendrocyte |
| Wac | Wac | 0.000422484 | 0.285045979 | 0.406 | 0.625 | 1 | Oligodendrocyte |
| Rc3h1 | Rc3h1 | 0.000440959 | 0.561126959 | 0.36 | 0.435 | 1 | Oligodendrocyte |
| Gabbr1 | Gabbr1 | 0.000441229 | 0.429666548 | 0.488 | 0.663 | 1 | Oligodendrocyte |
| Trpm7 | Trpm7 | 0.000454767 | 0.296950483 | 0.397 | 0.612 | 1 | Oligodendrocyte |
| Ywhae | Ywhae | 0.000461088 | 0.30982587 | 0.396 | 0.603 | 1 | Oligodendrocyte |
| Ubc | Ubc | 0.000498909 | 0.50680745 | 0.243 | 0.252 | 1 | Oligodendrocyte |
| Slc22a23 | Slc22a23 | 0.0006246 | 0.453883191 | 0.49 | 0.657 | 1 | Oligodendrocyte |
| Kif5b | Kif5b | 0.00065146 | 0.353524918 | 0.36 | 0.547 | 1 | Oligodendrocyte |
| Mat2a | Mat2a | 0.000787953 | 0.571126348 | 0.401 | 0.517 | 1 | Oligodendrocyte |
| Nbeal1 | Nbeal1 | 0.000825301 | 0.330678191 | 0.358 | 0.536 | 1 | Oligodendrocyte |
| Pak2 | Pak2 | 0.000865945 | 0.348330348 | 0.247 | 0.346 | 1 | Oligodendrocyte |
| Zbtb38 | Zbtb38 | 0.000873513 | 0.424149843 | 0.287 | 0.423 | 1 | Oligodendrocyte |
| Inpp5a | Inpp5a | 0.000980907 | 0.422292965 | 0.265 | 0.387 | 1 | Oligodendrocyte |
| Specc1 | Specc1 | 0.001000812 | 0.420553005 | 0.48 | 0.637 | 1 | Oligodendrocyte |
| Adam10 | Adam10 | 0.001032838 | 0.521768694 | 0.34 | 0.405 | 1 | Oligodendrocyte |
| Rbl2 | Rbl2 | 0.001112756 | 0.374149212 | 0.201 | 0.282 | 1 | Oligodendrocyte |
| Hnrnpa2b1 | Hnrnpa2b1 | 0.00112957 | 0.374024061 | 0.473 | 0.621 | 1 | Oligodendrocyte |
| 2310035C23Rik | 2310035C23Rik | 0.001148161 | 0.316332697 | 0.395 | 0.609 | 1 | Oligodendrocyte |
| Nufip2 | Nufip2 | 0.001179285 | 0.371109537 | 0.287 | 0.415 | 1 | Oligodendrocyte |
| Ubr2 | Ubr2 | 0.001185102 | 0.557360541 | 0.383 | 0.488 | 1 | Oligodendrocyte |
| Zfyve1 | Zfyve1 | 0.001213694 | 0.583077816 | 0.311 | 0.369 | 1 | Oligodendrocyte |
| Nipa1 | Nipa1 | 0.00124448 | 0.448282977 | 0.289 | 0.426 | 1 | Oligodendrocyte |
| Actn4 | Actn4 | 0.001646721 | 0.601676238 | 0.309 | 0.369 | 1 | Oligodendrocyte |
| Enox2 | Enox2 | 0.001952647 | 0.391196082 | 0.236 | 0.323 | 1 | Oligodendrocyte |
| Kif3a | Kif3a | 0.00230721 | 0.443249742 | 0.296 | 0.436 | 1 | Oligodendrocyte |
| Insr | Insr | 0.002658571 | 0.319440779 | 0.395 | 0.598 | 1 | Oligodendrocyte |
| Abca8b | Abca8b | 0.002816295 | 0.677856166 | 0.283 | 0.331 | 1 | Oligodendrocyte |
| Reep3 | Reep3 | 0.002871267 | 0.479408249 | 0.245 | 0.26 | 1 | Oligodendrocyte |
| Zfp740 | Zfp740 | 0.002962533 | 0.541762185 | 0.251 | 0.276 | 1 | Oligodendrocyte |
| Glrb | Glrb | 0.00313949 | 0.411830188 | 0.336 | 0.501 | 1 | Oligodendrocyte |
| Itm2c | Itm2c | 0.003271185 | 0.457623848 | 0.443 | 0.579 | 1 | Oligodendrocyte |
| Mdh1 | Mdh1 | 0.003328379 | 0.380603625 | 0.329 | 0.483 | 1 | Oligodendrocyte |
| Oaz1 | Oaz1 | 0.00333071 | 0.327220545 | 0.213 | 0.29 | 1 | Oligodendrocyte |
| Magi1 | Magi1 | 0.003428341 | 0.265208468 | 0.562 | 0.741 | 1 | Oligodendrocyte |
| Scaf11 | Scaf11 | 0.003638278 | 0.369219512 | 0.238 | 0.33 | 1 | Oligodendrocyte |
| H3f3a | H3f3a | 0.003660984 | 0.338922759 | 0.286 | 0.4 | 1 | Oligodendrocyte |
| Ube2h | Ube2h | 0.004250818 | 0.348754613 | 0.376 | 0.561 | 1 | Oligodendrocyte |
| Eif4g2 | Eif4g2 | 0.004524119 | 0.31826966 | 0.204 | 0.273 | 1 | Oligodendrocyte |
| Aldoa | Aldoa | 0.004648104 | 0.482928753 | 0.297 | 0.34 | 1 | Oligodendrocyte |
| Ptpn11 | Ptpn11 | 0.004670883 | 0.626388964 | 0.321 | 0.396 | 1 | Oligodendrocyte |
| Papss1 | Papss1 | 0.00476222 | 0.381736254 | 0.22 | 0.303 | 1 | Oligodendrocyte |
| Dnajc24 | Dnajc24 | 0.004861645 | 0.392279873 | 0.219 | 0.302 | 1 | Oligodendrocyte |
| Dync1li2 | Dync1li2 | 0.005048811 | 0.576186173 | 0.339 | 0.423 | 1 | Oligodendrocyte |
| Nfatc3 | Nfatc3 | 0.005366275 | 0.368696266 | 0.241 | 0.332 | 1 | Oligodendrocyte |
| Purb | Purb | 0.005497964 | 0.341612996 | 0.238 | 0.324 | 1 | Oligodendrocyte |
| Snx1 | Snx1 | 0.005542378 | 0.558115046 | 0.263 | 0.295 | 1 | Oligodendrocyte |
| Tra2a | Tra2a | 0.00576265 | 0.263712713 | 0.576 | 0.796 | 1 | Oligodendrocyte |
| Mapre2 | Mapre2 | 0.005767992 | 0.672487649 | 0.418 | 0.569 | 1 | Oligodendrocyte |
| Lrrc1 | Lrrc1 | 0.005940516 | 0.428075521 | 0.255 | 0.361 | 1 | Oligodendrocyte |
| Tpd52 | Tpd52 | 0.006544215 | 0.542337348 | 0.25 | 0.28 | 1 | Oligodendrocyte |
| Zmynd8 | Zmynd8 | 0.007016977 | 0.395841614 | 0.483 | 0.662 | 1 | Oligodendrocyte |
| Ctsb | Ctsb | 0.008952621 | 0.32427262 | 0.226 | 0.302 | 1 | Oligodendrocyte |
| Evi5l | Evi5l | 0.0091994 | 0.548917403 | 0.296 | 0.351 | 1 | Oligodendrocyte |
| Usp22 | Usp22 | 0.009276197 | 0.347537623 | 0.197 | 0.263 | 1 | Oligodendrocyte |
| Slc1a2 | Slc1a2 | 0 | 4.21751095 | 0.847 | 0.392 | 0 | Astrocyte & NSC |
| Gpc5 | Gpc5 | 0 | 4.093712021 | 0.712 | 0.273 | 0 | Astrocyte & NSC |
| Rorb | Rorb | 0 | 3.3166351 | 0.727 | 0.07 | 0 | Astrocyte & NSC |
| Msi2 | Msi2 | 0 | 3.269669756 | 0.958 | 0.586 | 0 | Astrocyte & NSC |
| Slc1a3 | Slc1a3 | 0 | 3.186219628 | 0.772 | 0.176 | 0 | Astrocyte & NSC |
| Prex2 | Prex2 | 0 | 3.147555006 | 0.696 | 0.233 | 0 | Astrocyte & NSC |
| Gm3764 | Gm3764 | 0 | 2.936949937 | 0.861 | 0.299 | 0 | Astrocyte & NSC |
| Plpp3 | Plpp3 | 0 | 2.670835949 | 0.743 | 0.206 | 0 | Astrocyte & NSC |
| Gm12239 | Gm12239 | 0 | 2.647215142 | 0.516 | 0.085 | 0 | Astrocyte & NSC |
| Nfib | Nfib | 0 | 2.633290954 | 0.926 | 0.275 | 0 | Astrocyte & NSC |
| Farp1 | Farp1 | 0 | 2.593424349 | 0.829 | 0.235 | 0 | Astrocyte & NSC |
| Atp1a2 | Atp1a2 | 0 | 2.499675774 | 0.669 | 0.157 | 0 | Astrocyte & NSC |
| Nfia1 | Nfia | 0 | 2.495461159 | 0.908 | 0.348 | 0 | Astrocyte & NSC |
| Npas3 | Npas3 | 0 | 2.367392997 | 0.787 | 0.373 | 0 | Astrocyte & NSC |
| Bmpr1b | Bmpr1b | 0 | 2.360825712 | 0.545 | 0.039 | 0 | Astrocyte & NSC |
| Cpe | Cpe | 0 | 2.310760161 | 0.89 | 0.72 | 0 | Astrocyte & NSC |
| Ptprz1 | Ptprz1 | 0 | 2.300780546 | 0.842 | 0.386 | 0 | Astrocyte & NSC |
| Luzp2 | Luzp2 | 0 | 2.221774686 | 0.723 | 0.333 | 0 | Astrocyte & NSC |
| Nhsl1 | Nhsl1 | 0 | 2.214267743 | 0.503 | 0.046 | 0 | Astrocyte & NSC |
| Pitpnc1 | Pitpnc1 | 0 | 2.213541894 | 0.827 | 0.581 | 0 | Astrocyte & NSC |
| Dtna | Dtna | 0 | 2.192426374 | 0.805 | 0.747 | 0 | Astrocyte & NSC |
| Gli3 | Gli3 | 0 | 2.12173318 | 0.569 | 0.147 | 0 | Astrocyte & NSC |
| Prdm16 | Prdm16 | 0 | 2.120538741 | 0.516 | 0.032 | 0 | Astrocyte & NSC |
| Sparcl1 | Sparcl1 | 0 | 2.108476832 | 0.583 | 0.221 | 0 | Astrocyte & NSC |
| Pbx1 | Pbx1 | 0 | 2.061830164 | 0.977 | 0.821 | 0 | Astrocyte & NSC |
| Lama21 | Lama2 | 0 | 2.015670939 | 0.606 | 0.133 | 0 | Astrocyte & NSC |
| Nwd1 | Nwd1 | 0 | 2.013003094 | 0.524 | 0.064 | 0 | Astrocyte & NSC |
| Glis3 | Glis3 | 0 | 2.002657561 | 0.511 | 0.059 | 0 | Astrocyte & NSC |
| Sfxn5 | Sfxn5 | 0 | 1.995965702 | 0.65 | 0.387 | 0 | Astrocyte & NSC |
| Mertk | Mertk | 0 | 1.994590927 | 0.593 | 0.085 | 0 | Astrocyte & NSC |
| Maml2 | Maml2 | 0 | 1.986291617 | 0.8 | 0.277 | 0 | Astrocyte & NSC |
| Gm973 | Gm973 | 0 | 1.976724835 | 0.501 | 0.034 | 0 | Astrocyte & NSC |
| Apoe | Apoe | 0 | 1.971871562 | 0.809 | 0.503 | 0 | Astrocyte & NSC |
| Egfr | Egfr | 0 | 1.955099877 | 0.41 | 0.037 | 0 | Astrocyte & NSC |
| Sox5 | Sox5 | 0 | 1.938787988 | 0.722 | 0.154 | 0 | Astrocyte & NSC |
| Nxn | Nxn | 0 | 1.925970653 | 0.49 | 0.085 | 0 | Astrocyte & NSC |
| Arhgef26 | Arhgef26 | 0 | 1.902266942 | 0.494 | 0.06 | 0 | Astrocyte & NSC |
| Zfpm2 | Zfpm2 | 0 | 1.896528074 | 0.652 | 0.174 | 0 | Astrocyte & NSC |
| St3gal41 | St3gal4 | 0 | 1.883685368 | 0.655 | 0.286 | 0 | Astrocyte & NSC |
| Tcf41 | Tcf4 | 0 | 1.881847958 | 0.965 | 0.638 | 0 | Astrocyte & NSC |
| Rgs20 | Rgs20 | 0 | 1.873831664 | 0.791 | 0.61 | 0 | Astrocyte & NSC |
| Slco1c1 | Slco1c1 | 0 | 1.868546771 | 0.486 | 0.031 | 0 | Astrocyte & NSC |
| Phkg1 | Phkg1 | 0 | 1.859079543 | 0.452 | 0.047 | 0 | Astrocyte & NSC |
| Phka1 | Phka1 | 0 | 1.85773612 | 0.512 | 0.116 | 0 | Astrocyte & NSC |
| Pard3b | Pard3b | 0 | 1.819300215 | 0.599 | 0.173 | 0 | Astrocyte & NSC |
| Nckap5 | Nckap5 | 0 | 1.815430405 | 0.64 | 0.198 | 0 | Astrocyte & NSC |
| Nrxn1 | Nrxn1 | 0 | 1.805588584 | 0.989 | 0.914 | 0 | Astrocyte & NSC |
| Grk3 | Grk3 | 0 | 1.776505005 | 0.528 | 0.12 | 0 | Astrocyte & NSC |
| Tead1 | Tead1 | 0 | 1.766754265 | 0.586 | 0.21 | 0 | Astrocyte & NSC |
| Acsl3 | Acsl3 | 0 | 1.745951197 | 0.578 | 0.243 | 0 | Astrocyte & NSC |
| Hdac8 | Hdac8 | 0 | 1.661469473 | 0.755 | 0.65 | 0 | Astrocyte & NSC |
| Zbtb20 | Zbtb20 | 0 | 1.641951452 | 0.996 | 0.959 | 0 | Astrocyte & NSC |
| Sox6 | Sox6 | 0 | 1.636788865 | 0.747 | 0.157 | 0 | Astrocyte & NSC |
| Rfx4 | Rfx4 | 0 | 1.636079671 | 0.474 | 0.133 | 0 | Astrocyte & NSC |
| Slc6a11 | Slc6a11 | 0 | 1.594408296 | 0.354 | 0.075 | 0 | Astrocyte & NSC |
| Tspan7 | Tspan7 | 0 | 1.592694043 | 0.812 | 0.758 | 0 | Astrocyte & NSC |
| Mid1 | Mid1 | 0 | 1.568659369 | 0.395 | 0.076 | 0 | Astrocyte & NSC |
| Acsbg1 | Acsbg1 | 0 | 1.559055772 | 0.372 | 0.017 | 0 | Astrocyte & NSC |
| Acss1 | Acss1 | 0 | 1.544516617 | 0.45 | 0.056 | 0 | Astrocyte & NSC |
| RF01962 | RF01962 | 0 | 1.542600987 | 0.49 | 0.124 | 0 | Astrocyte & NSC |
| Bcan | Bcan | 0 | 1.542368759 | 0.445 | 0.084 | 0 | Astrocyte & NSC |
| Paqr8 | Paqr8 | 0 | 1.525511407 | 0.421 | 0.124 | 0 | Astrocyte & NSC |
| Slc39a12 | Slc39a12 | 0 | 1.521267145 | 0.374 | 0.043 | 0 | Astrocyte & NSC |
| Htra1 | Htra1 | 0 | 1.521229086 | 0.395 | 0.066 | 0 | Astrocyte & NSC |
| Ddah1 | Ddah1 | 0 | 1.517538313 | 0.453 | 0.144 | 0 | Astrocyte & NSC |
| Mcc | Mcc | 0 | 1.503597737 | 0.421 | 0.089 | 0 | Astrocyte & NSC |
| Slc7a11 | Slc7a11 | 0 | 1.499452439 | 0.295 | 0.034 | 0 | Astrocyte & NSC |
| Gldc | Gldc | 0 | 1.477053844 | 0.347 | 0.023 | 0 | Astrocyte & NSC |
| Tcf7l2 | Tcf7l2 | 0 | 1.468013594 | 0.525 | 0.107 | 0 | Astrocyte & NSC |
| Gli2 | Gli2 | 0 | 1.444573265 | 0.355 | 0.009 | 0 | Astrocyte & NSC |
| Fgfr3 | Fgfr3 | 0 | 1.432746356 | 0.367 | 0.034 | 0 | Astrocyte & NSC |
| Fam20a | Fam20a | 0 | 1.423941013 | 0.311 | 0.018 | 0 | Astrocyte & NSC |
| Ndrg2 | Ndrg2 | 0 | 1.422673897 | 0.408 | 0.088 | 0 | Astrocyte & NSC |
| Tox | Tox | 0 | 1.416217604 | 0.521 | 0.193 | 0 | Astrocyte & NSC |
| F3 | F3 | 0 | 1.408238492 | 0.371 | 0.054 | 0 | Astrocyte & NSC |
| Lhfp | Lhfp | 0 | 1.394322861 | 0.359 | 0.084 | 0 | Astrocyte & NSC |
| Ttc28 | Ttc28 | 0 | 1.377388483 | 0.589 | 0.229 | 0 | Astrocyte & NSC |
| Gm11266 | Gm11266 | 0 | 1.362554406 | 0.354 | 0.019 | 0 | Astrocyte & NSC |
| Prrx1 | Prrx1 | 0 | 1.34375448 | 0.323 | 0.024 | 0 | Astrocyte & NSC |
| Dkk3 | Dkk3 | 0 | 1.336747477 | 0.317 | 0.044 | 0 | Astrocyte & NSC |
| Appl2 | Appl2 | 0 | 1.325337726 | 0.419 | 0.125 | 0 | Astrocyte & NSC |
| Gja1 | Gja1 | 0 | 1.314323665 | 0.372 | 0.085 | 0 | Astrocyte & NSC |
| Fgd6 | Fgd6 | 0 | 1.275345004 | 0.342 | 0.028 | 0 | Astrocyte & NSC |
| Rgma | Rgma | 0 | 1.249768755 | 0.387 | 0.094 | 0 | Astrocyte & NSC |
| Palld | Palld | 0 | 1.246682025 | 0.285 | 0.03 | 0 | Astrocyte & NSC |
| Abca1 | Abca1 | 0 | 1.232896855 | 0.447 | 0.128 | 0 | Astrocyte & NSC |
| Pdlim5 | Pdlim5 | 0 | 1.222463655 | 0.39 | 0.103 | 0 | Astrocyte & NSC |
| Gramd3 | Gramd3 | 0 | 1.198020168 | 0.373 | 0.067 | 0 | Astrocyte & NSC |
| Hepacam1 | Hepacam | 0 | 1.1908431 | 0.478 | 0.144 | 0 | Astrocyte & NSC |
| Macf1 | Macf1 | 0 | 1.177873148 | 0.945 | 0.913 | 0 | Astrocyte & NSC |
| Ddo | Ddo | 0 | 1.177843502 | 0.296 | 0.031 | 0 | Astrocyte & NSC |
| Ntsr2 | Ntsr2 | 0 | 1.161188896 | 0.307 | 0.05 | 0 | Astrocyte & NSC |
| Tcf7l1 | Tcf7l1 | 0 | 1.155293391 | 0.311 | 0.053 | 0 | Astrocyte & NSC |
| Hif3a | Hif3a | 0 | 1.148590774 | 0.286 | 0.016 | 0 | Astrocyte & NSC |
| Gm40578 | Gm40578 | 0 | 1.141824308 | 0.29 | 0.026 | 0 | Astrocyte & NSC |
| Zeb1 | Zeb1 | 0 | 1.140407462 | 0.863 | 0.769 | 0 | Astrocyte & NSC |
| Rftn2 | Rftn2 | 0 | 1.135810312 | 0.315 | 0.043 | 0 | Astrocyte & NSC |
| Grin2c | Grin2c | 0 | 1.121190225 | 0.257 | 0.022 | 0 | Astrocyte & NSC |
| Ctnnd2 | Ctnnd2 | 0 | 1.119742677 | 0.971 | 0.865 | 0 | Astrocyte & NSC |
| Ccdc141 | Ccdc141 | 0 | 1.119494009 | 0.306 | 0.047 | 0 | Astrocyte & NSC |
| Gm14964 | Gm14964 | 0 | 1.113592756 | 0.291 | 0.035 | 0 | Astrocyte & NSC |
| Wwtr1 | Wwtr1 | 0 | 1.10781277 | 0.308 | 0.048 | 0 | Astrocyte & NSC |
| Notch1 | Notch1 | 0 | 1.075295775 | 0.305 | 0.04 | 0 | Astrocyte & NSC |
| Sh3pxd2b | Sh3pxd2b | 0 | 1.067298835 | 0.287 | 0.034 | 0 | Astrocyte & NSC |
| Gpm6b1 | Gpm6b | 0 | 1.055465836 | 0.923 | 0.891 | 0 | Astrocyte & NSC |
| Fads2 | Fads2 | 0 | 1.047383294 | 0.271 | 0.024 | 0 | Astrocyte & NSC |
| Gm424181 | Gm42418 | 0 | 0.804288518 | 1 | 0.998 | 0 | Astrocyte & NSC |
| Prdx6 | Prdx6 | 1.14E-306 | 1.403785106 | 0.431 | 0.145 | 2.59E-302 | Astrocyte & NSC |
| Ptprt | Ptprt | 6.64E-306 | 1.667123762 | 0.764 | 0.621 | 1.51E-301 | Astrocyte & NSC |
| Pygb | Pygb | 5.13E-302 | 1.434468827 | 0.445 | 0.158 | 1.16E-297 | Astrocyte & NSC |
| Mmd2 | Mmd2 | 2.02E-297 | 1.411436297 | 0.424 | 0.144 | 4.59E-293 | Astrocyte & NSC |
| Asrgl1 | Asrgl1 | 1.60E-296 | 1.270518416 | 0.416 | 0.131 | 3.63E-292 | Astrocyte & NSC |
| Trps1 | Trps1 | 5.25E-296 | 1.383919434 | 0.803 | 0.728 | 1.19E-291 | Astrocyte & NSC |
| Fmn2 | Fmn2 | 1.35E-295 | 1.270623513 | 0.774 | 0.687 | 3.07E-291 | Astrocyte & NSC |
| Rora | Rora | 2.61E-282 | 1.211077999 | 0.886 | 0.844 | 5.92E-278 | Astrocyte & NSC |
| CT025619.2 | CT025619.2 | 6.66E-278 | 1.433553652 | 0.661 | 0.464 | 1.51E-273 | Astrocyte & NSC |
| Cecr2 | Cecr2 | 1.58E-275 | 0.915175728 | 0.262 | 0.047 | 3.60E-271 | Astrocyte & NSC |
| Frmd4a | Frmd4a | 2.92E-271 | 1.301431766 | 0.866 | 0.812 | 6.63E-267 | Astrocyte & NSC |
| Wdr17 | Wdr17 | 2.72E-269 | 1.895305744 | 0.712 | 0.62 | 6.18E-265 | Astrocyte & NSC |
| Ntm | Ntm | 1.12E-267 | 1.640979451 | 0.85 | 0.771 | 2.54E-263 | Astrocyte & NSC |
| Cdh2 | Cdh2 | 6.42E-266 | 1.321415789 | 0.751 | 0.629 | 1.46E-261 | Astrocyte & NSC |
| 9430041J12Rik | 9430041J12Rik | 1.32E-265 | 1.164142521 | 0.296 | 0.07 | 3.00E-261 | Astrocyte & NSC |
| Dpf3 | Dpf3 | 6.03E-265 | 1.01203591 | 0.261 | 0.051 | 1.37E-260 | Astrocyte & NSC |
| Adcy2 | Adcy2 | 6.07E-265 | 1.461446785 | 0.564 | 0.277 | 1.38E-260 | Astrocyte & NSC |
| 4930488L21Rik | 4930488L21Rik | 7.31E-265 | 1.489823747 | 0.355 | 0.106 | 1.66E-260 | Astrocyte & NSC |
| Psd2 | Psd2 | 1.54E-263 | 1.012545911 | 0.276 | 0.06 | 3.49E-259 | Astrocyte & NSC |
| Gabrb1 | Gabrb1 | 1.99E-261 | 1.540442194 | 0.816 | 0.805 | 4.52E-257 | Astrocyte & NSC |
| Glul1 | Glul | 3.40E-260 | 1.226878992 | 0.447 | 0.165 | 7.72E-256 | Astrocyte & NSC |
| Klf12 | Klf12 | 1.08E-258 | 1.169074503 | 0.802 | 0.694 | 2.44E-254 | Astrocyte & NSC |
| Ston21 | Ston2 | 3.61E-258 | 1.221694094 | 0.411 | 0.138 | 8.20E-254 | Astrocyte & NSC |
| Pou2f1 | Pou2f1 | 8.44E-258 | 1.409387369 | 0.697 | 0.563 | 1.92E-253 | Astrocyte & NSC |
| Slc27a1 | Slc27a1 | 1.63E-257 | 1.242784147 | 0.391 | 0.135 | 3.71E-253 | Astrocyte & NSC |
| AC154683.1 | AC154683.1 | 8.26E-256 | 1.190330852 | 0.285 | 0.067 | 1.88E-251 | Astrocyte & NSC |
| Myo10 | Myo10 | 2.87E-255 | 1.270700749 | 0.409 | 0.15 | 6.51E-251 | Astrocyte & NSC |
| Cst31 | Cst3 | 1.66E-250 | 1.192488076 | 0.723 | 0.544 | 3.76E-246 | Astrocyte & NSC |
| Sugct | Sugct | 2.79E-250 | 1.223676147 | 0.313 | 0.082 | 6.33E-246 | Astrocyte & NSC |
| Gpam | Gpam | 5.36E-250 | 1.009482897 | 0.267 | 0.059 | 1.22E-245 | Astrocyte & NSC |
| Zfp6081 | Zfp608 | 1.80E-248 | 1.296645478 | 0.644 | 0.386 | 4.10E-244 | Astrocyte & NSC |
| Gnao11 | Gnao1 | 2.21E-244 | 1.082043093 | 0.842 | 0.84 | 5.01E-240 | Astrocyte & NSC |
| C130071C03Rik | C130071C03Rik | 2.92E-241 | 1.249525044 | 0.73 | 0.62 | 6.62E-237 | Astrocyte & NSC |
| Zmiz1 | Zmiz1 | 1.76E-238 | 1.312541684 | 0.513 | 0.248 | 4.00E-234 | Astrocyte & NSC |
| Qk1 | Qk | 6.35E-236 | 0.667878856 | 0.892 | 0.742 | 1.44E-231 | Astrocyte & NSC |
| Cspg5 | Cspg5 | 2.61E-235 | 1.544390088 | 0.591 | 0.382 | 5.93E-231 | Astrocyte & NSC |
| Mir9-3hg | Mir9-3hg | 1.23E-231 | 1.399427108 | 0.598 | 0.397 | 2.80E-227 | Astrocyte & NSC |
| Spon1 | Spon1 | 1.10E-222 | 1.322373016 | 0.398 | 0.148 | 2.49E-218 | Astrocyte & NSC |
| Enah | Enah | 3.64E-220 | 1.140242264 | 0.725 | 0.613 | 8.27E-216 | Astrocyte & NSC |
| Bcar3 | Bcar3 | 5.56E-212 | 1.121408723 | 0.284 | 0.08 | 1.26E-207 | Astrocyte & NSC |
| Dock12 | Dock1 | 7.79E-212 | 1.072251142 | 0.58 | 0.305 | 1.77E-207 | Astrocyte & NSC |
| Cpq | Cpq | 1.58E-210 | 1.053170322 | 0.311 | 0.092 | 3.58E-206 | Astrocyte & NSC |
| Cables1 | Cables1 | 2.47E-210 | 1.283296506 | 0.36 | 0.131 | 5.60E-206 | Astrocyte & NSC |
| Glud1 | Glud1 | 4.89E-206 | 1.395242124 | 0.531 | 0.321 | 1.11E-201 | Astrocyte & NSC |
| Plce1 | Plce1 | 1.38E-205 | 1.3329556 | 0.425 | 0.187 | 3.13E-201 | Astrocyte & NSC |
| Eps151 | Eps15 | 1.01E-203 | 1.232719064 | 0.552 | 0.314 | 2.29E-199 | Astrocyte & NSC |
| Itga6 | Itga6 | 1.14E-202 | 0.868528302 | 0.268 | 0.067 | 2.58E-198 | Astrocyte & NSC |
| 4930402H24Rik1 | 4930402H24Rik | 1.70E-201 | 0.756076553 | 0.881 | 0.88 | 3.86E-197 | Astrocyte & NSC |
| Epb41l5 | Epb41l5 | 2.76E-201 | 1.066052614 | 0.315 | 0.103 | 6.28E-197 | Astrocyte & NSC |
| Mtss1l | Mtss1l | 3.49E-200 | 0.971484595 | 0.307 | 0.096 | 7.92E-196 | Astrocyte & NSC |
| Myo61 | Myo6 | 3.01E-198 | 1.19318626 | 0.585 | 0.348 | 6.85E-194 | Astrocyte & NSC |
| Shroom4 | Shroom4 | 5.72E-198 | 0.869063016 | 0.255 | 0.065 | 1.30E-193 | Astrocyte & NSC |
| Ddhd1 | Ddhd1 | 8.80E-197 | 1.437620596 | 0.586 | 0.428 | 2.00E-192 | Astrocyte & NSC |
| Plcb4 | Plcb4 | 2.59E-194 | 1.090904038 | 0.467 | 0.211 | 5.89E-190 | Astrocyte & NSC |
| Ccdc88a1 | Ccdc88a | 9.07E-194 | 1.019407413 | 0.802 | 0.815 | 2.06E-189 | Astrocyte & NSC |
| Zfp521 | Zfp521 | 1.34E-193 | 1.194907204 | 0.438 | 0.201 | 3.04E-189 | Astrocyte & NSC |
| Nol4 | Nol4 | 2.63E-191 | 1.948712373 | 0.683 | 0.605 | 5.96E-187 | Astrocyte & NSC |
| B3galt1 | B3galt1 | 3.37E-190 | 0.904134322 | 0.9 | 0.91 | 7.65E-186 | Astrocyte & NSC |
| Spag9 | Spag9 | 1.26E-189 | 0.837817654 | 0.791 | 0.779 | 2.85E-185 | Astrocyte & NSC |
| Lpp | Lpp | 1.37E-189 | 1.348393578 | 0.546 | 0.347 | 3.11E-185 | Astrocyte & NSC |
| Itpr2 | Itpr2 | 2.44E-189 | 0.768283899 | 0.322 | 0.098 | 5.54E-185 | Astrocyte & NSC |
| Cachd1 | Cachd1 | 1.14E-188 | 1.185958029 | 0.422 | 0.195 | 2.58E-184 | Astrocyte & NSC |
| Nfix1 | Nfix | 2.57E-188 | 0.959435404 | 0.406 | 0.159 | 5.84E-184 | Astrocyte & NSC |
| Tox3 | Tox3 | 2.60E-186 | 1.572866552 | 0.328 | 0.118 | 5.91E-182 | Astrocyte & NSC |
| Rgs6 | Rgs6 | 2.08E-185 | 1.448402604 | 0.551 | 0.327 | 4.73E-181 | Astrocyte & NSC |
| Cmss11 | Cmss1 | 1.32E-183 | 0.683099611 | 0.876 | 0.884 | 2.99E-179 | Astrocyte & NSC |
| Bach2 | Bach2 | 1.99E-183 | 1.076249443 | 0.663 | 0.481 | 4.53E-179 | Astrocyte & NSC |
| Fars2 | Fars2 | 1.44E-182 | 1.336142207 | 0.691 | 0.655 | 3.27E-178 | Astrocyte & NSC |
| Gfra1 | Gfra1 | 5.41E-179 | 1.26755734 | 0.389 | 0.165 | 1.23E-174 | Astrocyte & NSC |
| Arhgef4 | Arhgef4 | 1.24E-171 | 1.396481704 | 0.482 | 0.295 | 2.82E-167 | Astrocyte & NSC |
| Plekhg11 | Plekhg1 | 3.33E-170 | 0.758391381 | 0.457 | 0.187 | 7.56E-166 | Astrocyte & NSC |
| Nim1k | Nim1k | 7.81E-169 | 1.292115878 | 0.374 | 0.172 | 1.77E-164 | Astrocyte & NSC |
| Scg3 | Scg3 | 6.07E-168 | 1.118184539 | 0.382 | 0.176 | 1.38E-163 | Astrocyte & NSC |
| Eda | Eda | 8.70E-166 | 1.425431337 | 0.44 | 0.233 | 1.98E-161 | Astrocyte & NSC |
| Ugp2 | Ugp2 | 9.44E-165 | 1.190677144 | 0.439 | 0.23 | 2.14E-160 | Astrocyte & NSC |
| Zhx2 | Zhx2 | 5.71E-164 | 1.163893128 | 0.414 | 0.209 | 1.30E-159 | Astrocyte & NSC |
| Adk | Adk | 5.78E-163 | 1.197020955 | 0.629 | 0.508 | 1.31E-158 | Astrocyte & NSC |
| Camk2g | Camk2g | 5.69E-161 | 1.337803111 | 0.442 | 0.25 | 1.29E-156 | Astrocyte & NSC |
| Crlf3 | Crlf3 | 1.51E-157 | 1.057150281 | 0.387 | 0.178 | 3.43E-153 | Astrocyte & NSC |
| Cdk14 | Cdk14 | 1.81E-154 | 1.060486168 | 0.595 | 0.404 | 4.11E-150 | Astrocyte & NSC |
| Ccnd3 | Ccnd3 | 1.83E-154 | 0.723067109 | 0.282 | 0.089 | 4.15E-150 | Astrocyte & NSC |
| Arhgap5 | Arhgap5 | 3.06E-154 | 1.061685587 | 0.661 | 0.58 | 6.96E-150 | Astrocyte & NSC |
| Fgfr21 | Fgfr2 | 9.86E-153 | 0.665558593 | 0.824 | 0.851 | 2.24E-148 | Astrocyte & NSC |
| Notch2 | Notch2 | 2.67E-152 | 0.835433328 | 0.261 | 0.086 | 6.05E-148 | Astrocyte & NSC |
| Zeb21 | Zeb2 | 2.90E-152 | 0.358150561 | 0.725 | 0.379 | 6.58E-148 | Astrocyte & NSC |
| Bcl2 | Bcl2 | 2.03E-147 | 1.276297564 | 0.5 | 0.331 | 4.61E-143 | Astrocyte & NSC |
| Fmnl21 | Fmnl2 | 2.21E-147 | 0.846695701 | 0.633 | 0.433 | 5.02E-143 | Astrocyte & NSC |
| Mgat5 | Mgat5 | 1.88E-146 | 1.242256613 | 0.593 | 0.481 | 4.26E-142 | Astrocyte & NSC |
| Cadm1 | Cadm1 | 1.12E-145 | 0.882546485 | 0.839 | 0.863 | 2.54E-141 | Astrocyte & NSC |
| Pnpla7 | Pnpla7 | 8.54E-145 | 1.051828246 | 0.412 | 0.211 | 1.94E-140 | Astrocyte & NSC |
| Kcnn2 | Kcnn2 | 2.98E-144 | 1.13410482 | 0.605 | 0.49 | 6.77E-140 | Astrocyte & NSC |
| Nrcam | Nrcam | 2.33E-142 | 0.918889216 | 0.739 | 0.693 | 5.30E-138 | Astrocyte & NSC |
| Tprkb | Tprkb | 6.12E-141 | 1.17516271 | 0.343 | 0.158 | 1.39E-136 | Astrocyte & NSC |
| Abr | Abr | 3.99E-140 | 1.117054094 | 0.636 | 0.586 | 9.06E-136 | Astrocyte & NSC |
| Hdac9 | Hdac9 | 5.49E-137 | 0.981030646 | 0.689 | 0.597 | 1.25E-132 | Astrocyte & NSC |
| Tmem47 | Tmem47 | 6.49E-137 | 1.031552176 | 0.363 | 0.178 | 1.47E-132 | Astrocyte & NSC |
| Kmt2c | Kmt2c | 7.92E-136 | 0.834722549 | 0.713 | 0.717 | 1.80E-131 | Astrocyte & NSC |
| Rimklb | Rimklb | 5.94E-135 | 0.964103149 | 0.313 | 0.137 | 1.35E-130 | Astrocyte & NSC |
| Il181 | Il18 | 8.43E-134 | 0.922722451 | 0.356 | 0.163 | 1.92E-129 | Astrocyte & NSC |
| Gpm6a | Gpm6a | 6.84E-132 | 0.672194107 | 0.872 | 0.875 | 1.55E-127 | Astrocyte & NSC |
| Tspan9 | Tspan9 | 1.27E-131 | 0.832544717 | 0.317 | 0.131 | 2.88E-127 | Astrocyte & NSC |
| Cadm21 | Cadm2 | 2.51E-129 | 0.465435505 | 0.983 | 0.968 | 5.70E-125 | Astrocyte & NSC |
| Sash1 | Sash1 | 2.81E-129 | 1.131381219 | 0.497 | 0.332 | 6.37E-125 | Astrocyte & NSC |
| Tnfrsf19 | Tnfrsf19 | 3.47E-128 | 1.243597386 | 0.341 | 0.169 | 7.89E-124 | Astrocyte & NSC |
| Megf101 | Megf10 | 1.29E-126 | 0.686847445 | 0.312 | 0.121 | 2.94E-122 | Astrocyte & NSC |
| Daam21 | Daam2 | 2.29E-126 | 0.683383679 | 0.365 | 0.15 | 5.20E-122 | Astrocyte & NSC |
| Son | Son | 6.76E-126 | 0.798902173 | 0.717 | 0.739 | 1.53E-121 | Astrocyte & NSC |
| Trpm3 | Trpm3 | 1.09E-125 | 1.447261145 | 0.708 | 0.641 | 2.47E-121 | Astrocyte & NSC |
| Pantr1 | Pantr1 | 8.58E-123 | 1.126125863 | 0.409 | 0.245 | 1.95E-118 | Astrocyte & NSC |
| Cdh201 | Cdh20 | 5.03E-121 | 0.68028623 | 0.463 | 0.23 | 1.14E-116 | Astrocyte & NSC |
| Soat1 | Soat1 | 2.11E-120 | 0.860030224 | 0.269 | 0.109 | 4.79E-116 | Astrocyte & NSC |
| Chd71 | Chd7 | 1.71E-117 | 0.906614128 | 0.442 | 0.239 | 3.89E-113 | Astrocyte & NSC |
| Igf1r | Igf1r | 3.09E-117 | 0.876288241 | 0.691 | 0.677 | 7.01E-113 | Astrocyte & NSC |
| Eps8 | Eps8 | 7.43E-117 | 0.906024809 | 0.282 | 0.117 | 1.69E-112 | Astrocyte & NSC |
| Lix1 | Lix1 | 8.69E-117 | 1.055486701 | 0.287 | 0.128 | 1.97E-112 | Astrocyte & NSC |
| Akt3 | Akt3 | 8.73E-117 | 0.725572188 | 0.8 | 0.816 | 1.98E-112 | Astrocyte & NSC |
| Clybl | Clybl | 6.07E-114 | 1.109640604 | 0.343 | 0.181 | 1.38E-109 | Astrocyte & NSC |
| Hivep3 | Hivep3 | 5.59E-113 | 1.086829194 | 0.645 | 0.633 | 1.27E-108 | Astrocyte & NSC |
| Ptn1 | Ptn | 1.14E-112 | 0.981383404 | 0.645 | 0.579 | 2.59E-108 | Astrocyte & NSC |
| Phf21a | Phf21a | 6.08E-112 | 0.693702561 | 0.78 | 0.812 | 1.38E-107 | Astrocyte & NSC |
| Gpld1 | Gpld1 | 8.26E-112 | 0.902937466 | 0.268 | 0.115 | 1.88E-107 | Astrocyte & NSC |
| Auts2 | Auts2 | 1.72E-111 | 0.727441502 | 0.988 | 0.951 | 3.90E-107 | Astrocyte & NSC |
| Agl | Agl | 7.76E-110 | 0.870630552 | 0.291 | 0.133 | 1.76E-105 | Astrocyte & NSC |
| Ptpn13 | Ptpn13 | 1.58E-109 | 0.929655637 | 0.336 | 0.174 | 3.59E-105 | Astrocyte & NSC |
| Mical2 | Mical2 | 1.34E-108 | 1.148204501 | 0.377 | 0.226 | 3.05E-104 | Astrocyte & NSC |
| Ttyh1 | Ttyh1 | 1.58E-108 | 1.116139183 | 0.559 | 0.502 | 3.58E-104 | Astrocyte & NSC |
| Ntrk2 | Ntrk2 | 5.32E-108 | 0.852141078 | 0.767 | 0.766 | 1.21E-103 | Astrocyte & NSC |
| Csgalnact1 | Csgalnact1 | 6.00E-108 | 0.992245909 | 0.43 | 0.262 | 1.36E-103 | Astrocyte & NSC |
| Gng121 | Gng12 | 2.08E-106 | 0.773850467 | 0.334 | 0.159 | 4.73E-102 | Astrocyte & NSC |
| St6gal11 | St6gal1 | 3.58E-106 | 0.662542932 | 0.406 | 0.202 | 8.13E-102 | Astrocyte & NSC |
| Rasa2 | Rasa2 | 8.06E-106 | 1.051710266 | 0.475 | 0.349 | 1.83E-101 | Astrocyte & NSC |
| Spire1 | Spire1 | 2.82E-104 | 1.031215909 | 0.576 | 0.521 | 6.41E-100 | Astrocyte & NSC |
| Gk | Gk | 1.59E-103 | 1.03334717 | 0.333 | 0.18 | 3.62E-99 | Astrocyte & NSC |
| Hnrnpa2b11 | Hnrnpa2b1 | 8.11E-103 | 0.813656865 | 0.63 | 0.593 | 1.84E-98 | Astrocyte & NSC |
| Slc4a41 | Slc4a4 | 1.60E-102 | 0.985248838 | 0.774 | 0.704 | 3.64E-98 | Astrocyte & NSC |
| Lsamp1 | Lsamp | 4.56E-101 | 0.671583813 | 0.98 | 0.969 | 1.03E-96 | Astrocyte & NSC |
| Map2 | Map2 | 3.14E-97 | 0.807200329 | 0.834 | 0.838 | 7.13E-93 | Astrocyte & NSC |
| Kcnk10 | Kcnk10 | 4.51E-97 | 0.873550999 | 0.255 | 0.112 | 1.03E-92 | Astrocyte & NSC |
| Csrp11 | Csrp1 | 2.23E-96 | 0.560114746 | 0.273 | 0.111 | 5.07E-92 | Astrocyte & NSC |
| Mxi1 | Mxi1 | 8.16E-96 | 1.040006263 | 0.465 | 0.344 | 1.85E-91 | Astrocyte & NSC |
| Nedd4 | Nedd4 | 3.53E-95 | 0.718890498 | 0.695 | 0.73 | 8.01E-91 | Astrocyte & NSC |
| Malat11 | Malat1 | 1.12E-94 | 0.263901197 | 1 | 1 | 2.55E-90 | Astrocyte & NSC |
| Arhgef12 | Arhgef12 | 1.07E-93 | 0.90421088 | 0.647 | 0.68 | 2.42E-89 | Astrocyte & NSC |
| Ncoa1 | Ncoa1 | 2.68E-93 | 0.734609347 | 0.711 | 0.757 | 6.09E-89 | Astrocyte & NSC |
| Hipk21 | Hipk2 | 3.54E-93 | 0.565389352 | 0.553 | 0.371 | 8.05E-89 | Astrocyte & NSC |
| Chd9 | Chd9 | 9.42E-93 | 0.605308358 | 0.745 | 0.792 | 2.14E-88 | Astrocyte & NSC |
| Setbp1 | Setbp1 | 1.05E-92 | 0.982942152 | 0.713 | 0.727 | 2.39E-88 | Astrocyte & NSC |
| Ncam11 | Ncam1 | 1.75E-92 | 0.563600406 | 0.863 | 0.927 | 3.98E-88 | Astrocyte & NSC |
| Cep85l | Cep85l | 1.03E-90 | 1.076250197 | 0.457 | 0.341 | 2.34E-86 | Astrocyte & NSC |
| Aff1 | Aff1 | 2.21E-89 | 0.858911143 | 0.307 | 0.161 | 5.02E-85 | Astrocyte & NSC |
| Agmo | Agmo | 3.70E-88 | 0.514152611 | 0.253 | 0.101 | 8.41E-84 | Astrocyte & NSC |
| Gm487421 | Gm48742 | 8.83E-88 | 0.896982078 | 0.349 | 0.201 | 2.01E-83 | Astrocyte & NSC |
| Foxn31 | Foxn3 | 1.17E-86 | 0.553269081 | 0.658 | 0.539 | 2.66E-82 | Astrocyte & NSC |
| Fgf13 | Fgf13 | 1.33E-85 | 1.040220628 | 0.563 | 0.463 | 3.01E-81 | Astrocyte & NSC |
| Mapk41 | Mapk4 | 1.78E-85 | 0.884659912 | 0.605 | 0.551 | 4.04E-81 | Astrocyte & NSC |
| Arap21 | Arap2 | 1.46E-84 | 0.942809057 | 0.474 | 0.357 | 3.31E-80 | Astrocyte & NSC |
| Arhgef10l | Arhgef10l | 2.20E-84 | 0.934096211 | 0.341 | 0.209 | 5.00E-80 | Astrocyte & NSC |
| Tjp21 | Tjp2 | 2.17E-83 | 0.568476031 | 0.264 | 0.115 | 4.94E-79 | Astrocyte & NSC |
| Gm35188 | Gm35188 | 7.13E-83 | 0.943556381 | 0.498 | 0.4 | 1.62E-78 | Astrocyte & NSC |
| Vegfa | Vegfa | 1.97E-82 | 0.83397844 | 0.26 | 0.129 | 4.47E-78 | Astrocyte & NSC |
| Peli2 | Peli2 | 1.44E-81 | 0.946874246 | 0.457 | 0.35 | 3.26E-77 | Astrocyte & NSC |
| Wnk2 | Wnk2 | 7.85E-79 | 1.056811465 | 0.52 | 0.486 | 1.78E-74 | Astrocyte & NSC |
| Trim9 | Trim9 | 4.52E-77 | 1.01118285 | 0.616 | 0.655 | 1.03E-72 | Astrocyte & NSC |
| Gna13 | Gna13 | 1.12E-76 | 0.769095389 | 0.284 | 0.153 | 2.54E-72 | Astrocyte & NSC |
| Znrf3 | Znrf3 | 8.83E-76 | 0.943571805 | 0.518 | 0.463 | 2.01E-71 | Astrocyte & NSC |
| Ank21 | Ank2 | 1.87E-75 | 0.356795863 | 0.949 | 0.97 | 4.24E-71 | Astrocyte & NSC |
| Ppm1e | Ppm1e | 3.58E-73 | 0.773535584 | 0.444 | 0.289 | 8.14E-69 | Astrocyte & NSC |
| Clu | Clu | 2.56E-72 | 0.767422396 | 0.302 | 0.171 | 5.81E-68 | Astrocyte & NSC |
| Nrxn31 | Nrxn3 | 4.95E-72 | 0.452259071 | 0.928 | 0.959 | 1.12E-67 | Astrocyte & NSC |
| Zhx3 | Zhx3 | 5.19E-72 | 0.939665206 | 0.485 | 0.414 | 1.18E-67 | Astrocyte & NSC |
| Fgfr1 | Fgfr1 | 2.43E-71 | 0.795901712 | 0.276 | 0.151 | 5.52E-67 | Astrocyte & NSC |
| Gnaq | Gnaq | 3.81E-71 | 0.564188121 | 0.737 | 0.802 | 8.65E-67 | Astrocyte & NSC |
| Magi11 | Magi1 | 1.43E-70 | 0.701401092 | 0.685 | 0.719 | 3.26E-66 | Astrocyte & NSC |
| Prkd1 | Prkd1 | 3.02E-70 | 0.741920928 | 0.593 | 0.502 | 6.86E-66 | Astrocyte & NSC |
| Pnisr | Pnisr | 8.26E-70 | 0.51811784 | 0.747 | 0.819 | 1.88E-65 | Astrocyte & NSC |
| Cntfr | Cntfr | 2.01E-68 | 0.757842731 | 0.274 | 0.153 | 4.56E-64 | Astrocyte & NSC |
| Crtc3 | Crtc3 | 4.29E-68 | 0.881256004 | 0.462 | 0.384 | 9.75E-64 | Astrocyte & NSC |
| Kif1b1 | Kif1b | 4.69E-68 | 0.380728584 | 0.827 | 0.895 | 1.06E-63 | Astrocyte & NSC |
| Tmtc21 | Tmtc2 | 1.18E-66 | 0.759731397 | 0.571 | 0.503 | 2.67E-62 | Astrocyte & NSC |
| Mkln1 | Mkln1 | 3.28E-66 | 0.68556918 | 0.611 | 0.632 | 7.44E-62 | Astrocyte & NSC |
| Ankrd6 | Ankrd6 | 3.69E-66 | 1.004178885 | 0.461 | 0.398 | 8.39E-62 | Astrocyte & NSC |
| Nudt3 | Nudt3 | 1.07E-63 | 0.824873757 | 0.362 | 0.255 | 2.44E-59 | Astrocyte & NSC |
| Caskin1 | Caskin1 | 1.34E-63 | 0.827852283 | 0.302 | 0.191 | 3.04E-59 | Astrocyte & NSC |
| Wls | Wls | 1.76E-63 | 0.646295101 | 0.251 | 0.126 | 4.00E-59 | Astrocyte & NSC |
| Fgd4 | Fgd4 | 5.40E-63 | 0.805240786 | 0.408 | 0.308 | 1.23E-58 | Astrocyte & NSC |
| Nrf1 | Nrf1 | 7.20E-63 | 0.815588206 | 0.51 | 0.469 | 1.64E-58 | Astrocyte & NSC |
| Pou3f3 | Pou3f3 | 1.03E-62 | 0.723280559 | 0.284 | 0.168 | 2.33E-58 | Astrocyte & NSC |
| Apba2 | Apba2 | 1.50E-62 | 0.883266594 | 0.509 | 0.475 | 3.40E-58 | Astrocyte & NSC |
| Rfx3 | Rfx3 | 5.73E-62 | 0.547788809 | 0.746 | 0.764 | 1.30E-57 | Astrocyte & NSC |
| 2610035D17Rik1 | 2610035D17Rik | 1.07E-61 | 0.860589335 | 0.455 | 0.363 | 2.42E-57 | Astrocyte & NSC |
| Rb11 | Rb1 | 2.72E-61 | 0.778240067 | 0.485 | 0.416 | 6.18E-57 | Astrocyte & NSC |
| Gm48747 | Gm48747 | 8.56E-60 | 1.063823468 | 0.372 | 0.287 | 1.94E-55 | Astrocyte & NSC |
| Ptch1 | Ptch1 | 1.19E-59 | 1.169626678 | 0.466 | 0.424 | 2.71E-55 | Astrocyte & NSC |
| Ckb1 | Ckb | 3.32E-58 | 0.574622624 | 0.656 | 0.701 | 7.53E-54 | Astrocyte & NSC |
| Raver2 | Raver2 | 3.65E-58 | 0.985152931 | 0.337 | 0.241 | 8.29E-54 | Astrocyte & NSC |
| Cc2d2a | Cc2d2a | 1.61E-57 | 0.728035668 | 0.27 | 0.16 | 3.65E-53 | Astrocyte & NSC |
| Asap2 | Asap2 | 2.39E-57 | 0.779651571 | 0.328 | 0.223 | 5.43E-53 | Astrocyte & NSC |
| Robo21 | Robo2 | 1.29E-56 | 0.256694027 | 0.586 | 0.781 | 2.93E-52 | Astrocyte & NSC |
| Pid1 | Pid1 | 2.84E-56 | 0.754198319 | 0.525 | 0.465 | 6.46E-52 | Astrocyte & NSC |
| Tmem164 | Tmem164 | 2.79E-55 | 0.939182397 | 0.513 | 0.497 | 6.34E-51 | Astrocyte & NSC |
| Srgap3 | Srgap3 | 5.44E-55 | 0.619162166 | 0.695 | 0.74 | 1.24E-50 | Astrocyte & NSC |
| Cpeb4 | Cpeb4 | 2.24E-54 | 0.828652263 | 0.575 | 0.624 | 5.08E-50 | Astrocyte & NSC |
| Pcdh7 | Pcdh7 | 1.29E-53 | 0.678366646 | 0.701 | 0.711 | 2.92E-49 | Astrocyte & NSC |
| Id4 | Id4 | 1.09E-51 | 0.81582289 | 0.373 | 0.281 | 2.47E-47 | Astrocyte & NSC |
| Phkb | Phkb | 1.88E-51 | 0.814553971 | 0.498 | 0.465 | 4.26E-47 | Astrocyte & NSC |
| Cdh191 | Cdh19 | 6.16E-51 | 0.296656617 | 0.299 | 0.159 | 1.40E-46 | Astrocyte & NSC |
| Plxna4 | Plxna4 | 8.26E-51 | 0.507054626 | 0.333 | 0.613 | 1.88E-46 | Astrocyte & NSC |
| Snta1 | Snta1 | 2.04E-50 | 0.756122427 | 0.271 | 0.172 | 4.64E-46 | Astrocyte & NSC |
| Tnrc6b | Tnrc6b | 2.64E-50 | 0.493137021 | 0.737 | 0.828 | 5.99E-46 | Astrocyte & NSC |
| Fam13c1 | Fam13c | 1.22E-49 | 0.821372558 | 0.449 | 0.393 | 2.77E-45 | Astrocyte & NSC |
| Klf71 | Klf7 | 1.32E-49 | 0.714241841 | 0.537 | 0.518 | 3.00E-45 | Astrocyte & NSC |
| Map4k41 | Map4k4 | 1.94E-49 | 0.64098812 | 0.565 | 0.541 | 4.41E-45 | Astrocyte & NSC |
| Map2k6 | Map2k6 | 2.37E-49 | 0.798835751 | 0.414 | 0.35 | 5.38E-45 | Astrocyte & NSC |
| Mboat2 | Mboat2 | 5.46E-49 | 0.82789598 | 0.497 | 0.482 | 1.24E-44 | Astrocyte & NSC |
| Ttyh3 | Ttyh3 | 9.76E-48 | 0.797899264 | 0.334 | 0.25 | 2.22E-43 | Astrocyte & NSC |
| Sumo1 | Sumo1 | 1.48E-47 | 0.844218848 | 0.486 | 0.472 | 3.35E-43 | Astrocyte & NSC |
| Slc6a1 | Slc6a1 | 2.06E-46 | 0.698951949 | 0.53 | 0.539 | 4.68E-42 | Astrocyte & NSC |
| 3-Mar | 3-Mar | 6.25E-46 | 0.912174883 | 0.264 | 0.166 | 1.42E-41 | Astrocyte & NSC |
| Meis21 | Meis2 | 1.58E-45 | 0.752224316 | 0.912 | 0.797 | 3.59E-41 | Astrocyte & NSC |
| Lgr4 | Lgr4 | 4.11E-45 | 0.787220406 | 0.29 | 0.2 | 9.34E-41 | Astrocyte & NSC |
| Ikzf21 | Ikzf2 | 8.08E-45 | 0.541867503 | 0.262 | 0.156 | 1.83E-40 | Astrocyte & NSC |
| Vcl | Vcl | 3.46E-44 | 1.024771728 | 0.403 | 0.359 | 7.85E-40 | Astrocyte & NSC |
| Bmper | Bmper | 6.53E-44 | 0.950269353 | 0.258 | 0.169 | 1.48E-39 | Astrocyte & NSC |
| Acsl6 | Acsl6 | 8.45E-44 | 0.829547602 | 0.338 | 0.265 | 1.92E-39 | Astrocyte & NSC |
| Cuedc11 | Cuedc1 | 1.48E-43 | 0.586757883 | 0.308 | 0.206 | 3.36E-39 | Astrocyte & NSC |
| Timp3 | Timp3 | 2.80E-43 | 0.883213567 | 0.361 | 0.293 | 6.36E-39 | Astrocyte & NSC |
| Tnik1 | Tnik | 4.22E-43 | 0.510778618 | 0.79 | 0.827 | 9.58E-39 | Astrocyte & NSC |
| Clmn1 | Clmn | 1.05E-42 | 0.502594252 | 0.361 | 0.244 | 2.39E-38 | Astrocyte & NSC |
| Ivd | Ivd | 1.36E-42 | 0.758280579 | 0.301 | 0.217 | 3.09E-38 | Astrocyte & NSC |
| Tmsb4x1 | Tmsb4x | 1.43E-41 | 0.550533386 | 0.577 | 0.588 | 3.25E-37 | Astrocyte & NSC |
| 5031425E22Rik | 5031425E22Rik | 1.13E-40 | 0.67781901 | 0.53 | 0.555 | 2.56E-36 | Astrocyte & NSC |
| Itgb8 | Itgb8 | 1.66E-40 | 0.623720052 | 0.276 | 0.181 | 3.77E-36 | Astrocyte & NSC |
| Ubb1 | Ubb | 5.35E-40 | 0.540301355 | 0.593 | 0.617 | 1.22E-35 | Astrocyte & NSC |
| Gpc61 | Gpc6 | 6.79E-39 | 0.464378157 | 0.665 | 0.633 | 1.54E-34 | Astrocyte & NSC |
| Scd21 | Scd2 | 1.72E-38 | 0.546662119 | 0.506 | 0.468 | 3.90E-34 | Astrocyte & NSC |
| Ckap5 | Ckap5 | 3.61E-38 | 0.726645512 | 0.529 | 0.567 | 8.20E-34 | Astrocyte & NSC |
| Tiam2 | Tiam2 | 6.08E-38 | 1.332049249 | 0.437 | 0.431 | 1.38E-33 | Astrocyte & NSC |
| Gphn1 | Gphn | 6.94E-38 | 0.30716988 | 0.931 | 0.973 | 1.58E-33 | Astrocyte & NSC |
| Pcp41 | Pcp4 | 9.70E-38 | 0.568158004 | 0.576 | 0.596 | 2.20E-33 | Astrocyte & NSC |
| Xylt1 | Xylt1 | 1.64E-37 | 0.485730696 | 0.392 | 0.322 | 3.72E-33 | Astrocyte & NSC |
| Nnat | Nnat | 7.57E-37 | 0.878388976 | 0.48 | 0.465 | 1.72E-32 | Astrocyte & NSC |
| Dennd1a | Dennd1a | 8.99E-37 | 0.431347076 | 0.786 | 0.875 | 2.04E-32 | Astrocyte & NSC |
| Phyhipl | Phyhipl | 1.71E-36 | 0.740858115 | 0.405 | 0.357 | 3.89E-32 | Astrocyte & NSC |
| Alms1 | Alms1 | 2.01E-36 | 0.772065021 | 0.332 | 0.268 | 4.56E-32 | Astrocyte & NSC |
| Fermt2 | Fermt2 | 2.27E-36 | 0.727258392 | 0.392 | 0.34 | 5.16E-32 | Astrocyte & NSC |
| Ccnd2 | Ccnd2 | 3.63E-36 | 1.164471644 | 0.262 | 0.187 | 8.24E-32 | Astrocyte & NSC |
| Crym | Crym | 5.66E-35 | 1.033246206 | 0.304 | 0.237 | 1.29E-30 | Astrocyte & NSC |
| Sik31 | Sik3 | 1.15E-34 | 0.421592727 | 0.771 | 0.888 | 2.60E-30 | Astrocyte & NSC |
| Gnas | Gnas | 1.88E-34 | 0.449499382 | 0.555 | 0.529 | 4.26E-30 | Astrocyte & NSC |
| Kat6b | Kat6b | 3.29E-34 | 0.692796194 | 0.612 | 0.688 | 7.47E-30 | Astrocyte & NSC |
| Apc1 | Apc | 2.46E-33 | 0.418408632 | 0.726 | 0.822 | 5.58E-29 | Astrocyte & NSC |
| Baz2b1 | Baz2b | 4.32E-33 | 0.358459441 | 0.68 | 0.763 | 9.81E-29 | Astrocyte & NSC |
| Clasp1 | Clasp1 | 4.51E-33 | 0.639204959 | 0.548 | 0.61 | 1.02E-28 | Astrocyte & NSC |
| Ptpn4 | Ptpn4 | 1.11E-32 | 0.577444831 | 0.562 | 0.627 | 2.52E-28 | Astrocyte & NSC |
| Zfp438 | Zfp438 | 1.22E-32 | 0.632879812 | 0.256 | 0.178 | 2.76E-28 | Astrocyte & NSC |
| Crebbp | Crebbp | 7.64E-32 | 0.449939333 | 0.669 | 0.776 | 1.74E-27 | Astrocyte & NSC |
| Atp1b11 | Atp1b1 | 9.75E-32 | 0.4665098 | 0.662 | 0.762 | 2.21E-27 | Astrocyte & NSC |
| Nf1 | Nf1 | 1.28E-31 | 0.398850213 | 0.688 | 0.781 | 2.92E-27 | Astrocyte & NSC |
| Wwc1 | Wwc1 | 1.32E-31 | 0.793932564 | 0.426 | 0.416 | 3.00E-27 | Astrocyte & NSC |
| Atp2a2 | Atp2a2 | 1.34E-31 | 0.509430483 | 0.624 | 0.705 | 3.03E-27 | Astrocyte & NSC |
| Igsf8 | Igsf8 | 2.34E-31 | 0.652303509 | 0.275 | 0.205 | 5.32E-27 | Astrocyte & NSC |
| Ehbp1 | Ehbp1 | 2.30E-30 | 0.514330228 | 0.647 | 0.733 | 5.23E-26 | Astrocyte & NSC |
| Bmpr1a | Bmpr1a | 8.25E-30 | 0.722246077 | 0.466 | 0.484 | 1.87E-25 | Astrocyte & NSC |
| Sdk2 | Sdk2 | 3.12E-29 | 1.179624906 | 0.286 | 0.226 | 7.08E-25 | Astrocyte & NSC |
| Ddx5 | Ddx5 | 3.74E-29 | 0.396024727 | 0.687 | 0.803 | 8.50E-25 | Astrocyte & NSC |
| Atad2b | Atad2b | 3.90E-29 | 0.561874281 | 0.517 | 0.543 | 8.86E-25 | Astrocyte & NSC |
| Erbb41 | Erbb4 | 4.50E-29 | 1.003367228 | 0.734 | 0.713 | 1.02E-24 | Astrocyte & NSC |
| Tenm31 | Tenm3 | 6.63E-29 | 0.420228352 | 0.732 | 0.727 | 1.51E-24 | Astrocyte & NSC |
| Psap1 | Psap | 1.77E-28 | 0.529527535 | 0.545 | 0.589 | 4.02E-24 | Astrocyte & NSC |
| Bcl11a1 | Bcl11a | 9.08E-28 | 0.378312347 | 0.342 | 0.593 | 2.06E-23 | Astrocyte & NSC |
| Tnrc18 | Tnrc18 | 2.24E-26 | 0.668710353 | 0.449 | 0.464 | 5.09E-22 | Astrocyte & NSC |
| Arid2 | Arid2 | 4.32E-26 | 0.661739614 | 0.429 | 0.425 | 9.82E-22 | Astrocyte & NSC |
| Kansl1 | Kansl1 | 1.05E-25 | 0.372374563 | 0.761 | 0.864 | 2.38E-21 | Astrocyte & NSC |
| Hacd2 | Hacd2 | 1.69E-25 | 0.695907072 | 0.312 | 0.261 | 3.84E-21 | Astrocyte & NSC |
| Meis11 | Meis1 | 4.74E-25 | 0.6491492 | 0.332 | 0.267 | 1.08E-20 | Astrocyte & NSC |
| Actb1 | Actb | 1.29E-24 | 0.458951554 | 0.584 | 0.643 | 2.94E-20 | Astrocyte & NSC |
| Fbrsl1 | Fbrsl1 | 1.51E-24 | 0.657180489 | 0.345 | 0.31 | 3.44E-20 | Astrocyte & NSC |
| Stk3 | Stk3 | 2.70E-24 | 0.596906214 | 0.321 | 0.265 | 6.13E-20 | Astrocyte & NSC |
| Add31 | Add3 | 9.75E-24 | 0.67426041 | 0.447 | 0.457 | 2.21E-19 | Astrocyte & NSC |
| Epc1 | Epc1 | 9.98E-24 | 0.555405318 | 0.523 | 0.588 | 2.27E-19 | Astrocyte & NSC |
| Itsn1 | Itsn1 | 1.67E-23 | 0.625850333 | 0.484 | 0.538 | 3.79E-19 | Astrocyte & NSC |
| Efr3b | Efr3b | 2.32E-23 | 0.740226983 | 0.44 | 0.461 | 5.28E-19 | Astrocyte & NSC |
| Tbl1x | Tbl1x | 3.36E-23 | 0.541930267 | 0.558 | 0.636 | 7.63E-19 | Astrocyte & NSC |
| Ccdc501 | Ccdc50 | 3.55E-23 | 0.563939349 | 0.399 | 0.368 | 8.05E-19 | Astrocyte & NSC |
| Tor1aip1 | Tor1aip1 | 4.21E-23 | 0.552179754 | 0.266 | 0.205 | 9.56E-19 | Astrocyte & NSC |
| Daam11 | Daam1 | 4.91E-23 | 0.37653206 | 0.502 | 0.495 | 1.12E-18 | Astrocyte & NSC |
| Carmil1 | Carmil1 | 7.79E-23 | 0.652030881 | 0.451 | 0.469 | 1.77E-18 | Astrocyte & NSC |
| Garem1 | Garem1 | 1.29E-22 | 0.735574834 | 0.504 | 0.548 | 2.93E-18 | Astrocyte & NSC |
| Nipbl | Nipbl | 2.10E-22 | 0.4344732 | 0.618 | 0.736 | 4.77E-18 | Astrocyte & NSC |
| Ppp2r5a | Ppp2r5a | 4.81E-22 | 0.631002772 | 0.348 | 0.316 | 1.09E-17 | Astrocyte & NSC |
| Grm31 | Grm3 | 5.70E-22 | 0.65497114 | 0.716 | 0.813 | 1.30E-17 | Astrocyte & NSC |
| Ahcyl1 | Ahcyl1 | 6.41E-22 | 0.675390202 | 0.452 | 0.491 | 1.46E-17 | Astrocyte & NSC |
| Klhl5 | Klhl5 | 1.08E-21 | 0.535188741 | 0.253 | 0.193 | 2.46E-17 | Astrocyte & NSC |
| Acaca1 | Acaca | 1.44E-21 | 0.461919997 | 0.53 | 0.562 | 3.27E-17 | Astrocyte & NSC |
| Zfand3 | Zfand3 | 1.92E-21 | 0.481457951 | 0.565 | 0.657 | 4.36E-17 | Astrocyte & NSC |
| Hlf | Hlf | 2.90E-21 | 0.708637204 | 0.42 | 0.432 | 6.60E-17 | Astrocyte & NSC |
| Fam228b | Fam228b | 3.66E-21 | 0.608255227 | 0.272 | 0.221 | 8.31E-17 | Astrocyte & NSC |
| Bcl9 | Bcl9 | 9.38E-21 | 0.607874153 | 0.33 | 0.288 | 2.13E-16 | Astrocyte & NSC |
| Itm2b1 | Itm2b | 9.80E-21 | 0.514543872 | 0.48 | 0.505 | 2.23E-16 | Astrocyte & NSC |
| Eef1a11 | Eef1a1 | 1.17E-20 | 0.493324405 | 0.503 | 0.538 | 2.66E-16 | Astrocyte & NSC |
| Trak1 | Trak1 | 1.22E-20 | 0.683074081 | 0.386 | 0.389 | 2.77E-16 | Astrocyte & NSC |
| Gm38505 | Gm38505 | 2.23E-20 | 2.01598671 | 0.263 | 0.219 | 5.07E-16 | Astrocyte & NSC |
| Ogt | Ogt | 2.87E-20 | 0.392777181 | 0.671 | 0.797 | 6.52E-16 | Astrocyte & NSC |
| Extl3 | Extl3 | 2.97E-20 | 0.566141982 | 0.323 | 0.281 | 6.75E-16 | Astrocyte & NSC |
| Fchsd2 | Fchsd2 | 3.56E-20 | 0.290042998 | 0.64 | 0.724 | 8.08E-16 | Astrocyte & NSC |
| Rreb1 | Rreb1 | 5.12E-20 | 0.2931161 | 0.274 | 0.21 | 1.16E-15 | Astrocyte & NSC |
| Rnf180 | Rnf180 | 7.23E-20 | 0.65102365 | 0.401 | 0.404 | 1.64E-15 | Astrocyte & NSC |
| Astn11 | Astn1 | 1.85E-19 | 0.590611874 | 0.642 | 0.728 | 4.21E-15 | Astrocyte & NSC |
| Lims1 | Lims1 | 2.21E-19 | 0.495643595 | 0.398 | 0.373 | 5.03E-15 | Astrocyte & NSC |
| Rab30 | Rab30 | 8.19E-19 | 0.570241665 | 0.495 | 0.558 | 1.86E-14 | Astrocyte & NSC |
| Dyrk1a | Dyrk1a | 1.15E-18 | 0.56662766 | 0.489 | 0.551 | 2.60E-14 | Astrocyte & NSC |
| Pik3r11 | Pik3r1 | 1.18E-18 | 0.534926643 | 0.443 | 0.446 | 2.68E-14 | Astrocyte & NSC |
| Camk2d | Camk2d | 1.40E-18 | 0.321396201 | 0.402 | 0.334 | 3.19E-14 | Astrocyte & NSC |
| Mfn1 | Mfn1 | 2.50E-18 | 0.565614907 | 0.307 | 0.268 | 5.68E-14 | Astrocyte & NSC |
| 4930578G10Rik | 4930578G10Rik | 3.26E-18 | 0.858584617 | 0.406 | 0.425 | 7.41E-14 | Astrocyte & NSC |
| C530008M17Rik | C530008M17Rik | 1.30E-17 | 0.805480134 | 0.324 | 0.295 | 2.96E-13 | Astrocyte & NSC |
| Wasf3 | Wasf3 | 2.22E-17 | 0.69813792 | 0.36 | 0.359 | 5.03E-13 | Astrocyte & NSC |
| Atl2 | Atl2 | 2.77E-17 | 0.647229929 | 0.325 | 0.308 | 6.29E-13 | Astrocyte & NSC |
| Ywhae1 | Ywhae | 3.87E-17 | 0.471146698 | 0.514 | 0.582 | 8.79E-13 | Astrocyte & NSC |
| Cbx5 | Cbx5 | 3.89E-17 | 0.637014461 | 0.373 | 0.373 | 8.83E-13 | Astrocyte & NSC |
| Fam171b1 | Fam171b | 1.18E-16 | 0.633818655 | 0.49 | 0.565 | 2.68E-12 | Astrocyte & NSC |
| Ctnna1 | Ctnna1 | 3.24E-16 | 0.480560933 | 0.267 | 0.22 | 7.36E-12 | Astrocyte & NSC |
| Cd811 | Cd81 | 4.51E-16 | 0.506273364 | 0.353 | 0.325 | 1.02E-11 | Astrocyte & NSC |
| Tsc22d4 | Tsc22d4 | 5.17E-16 | 0.465306282 | 0.259 | 0.213 | 1.17E-11 | Astrocyte & NSC |
| Strn3 | Strn3 | 9.15E-16 | 0.356623999 | 0.667 | 0.807 | 2.08E-11 | Astrocyte & NSC |
| Usp541 | Usp54 | 9.23E-16 | 0.294485641 | 0.355 | 0.303 | 2.10E-11 | Astrocyte & NSC |
| Arhgap12 | Arhgap12 | 1.18E-15 | 0.544198893 | 0.378 | 0.377 | 2.68E-11 | Astrocyte & NSC |
| Itm2c1 | Itm2c | 1.44E-15 | 0.489729929 | 0.502 | 0.568 | 3.27E-11 | Astrocyte & NSC |
| Nr3c2 | Nr3c2 | 1.95E-15 | 0.51747968 | 0.588 | 0.682 | 4.43E-11 | Astrocyte & NSC |
| Cdh101 | Cdh10 | 2.33E-15 | 0.428858497 | 0.607 | 0.685 | 5.30E-11 | Astrocyte & NSC |
| Ppargc1a | Ppargc1a | 4.99E-15 | 0.675709091 | 0.37 | 0.376 | 1.13E-10 | Astrocyte & NSC |
| Arid1b | Arid1b | 5.13E-15 | 0.399972455 | 0.665 | 0.804 | 1.17E-10 | Astrocyte & NSC |
| Nedd4l1 | Nedd4l | 6.72E-15 | 0.491032299 | 0.71 | 0.777 | 1.53E-10 | Astrocyte & NSC |
| Ash1l | Ash1l | 1.09E-14 | 0.348930709 | 0.649 | 0.787 | 2.48E-10 | Astrocyte & NSC |
| Arid1a | Arid1a | 1.35E-14 | 0.50732894 | 0.474 | 0.538 | 3.07E-10 | Astrocyte & NSC |
| Ext1 | Ext1 | 1.81E-14 | 0.367107894 | 0.645 | 0.751 | 4.11E-10 | Astrocyte & NSC |
| Arnt2 | Arnt2 | 1.84E-14 | 0.450559173 | 0.49 | 0.553 | 4.17E-10 | Astrocyte & NSC |
| Slc35d1 | Slc35d1 | 3.94E-14 | 0.652832869 | 0.256 | 0.225 | 8.96E-10 | Astrocyte & NSC |
| Chd4 | Chd4 | 4.19E-14 | 0.559594557 | 0.452 | 0.509 | 9.51E-10 | Astrocyte & NSC |
| Sema6a1 | Sema6a | 9.63E-14 | 0.277067351 | 0.33 | 0.272 | 2.19E-09 | Astrocyte & NSC |
| Calm21 | Calm2 | 1.29E-13 | 0.292740327 | 0.691 | 0.829 | 2.93E-09 | Astrocyte & NSC |
| Gsk3b | Gsk3b | 2.73E-13 | 0.342726968 | 0.657 | 0.777 | 6.19E-09 | Astrocyte & NSC |
| Etv6 | Etv6 | 3.09E-13 | 0.4393161 | 0.342 | 0.323 | 7.02E-09 | Astrocyte & NSC |
| Slit2 | Slit2 | 4.20E-13 | 0.812754386 | 0.269 | 0.229 | 9.54E-09 | Astrocyte & NSC |
| Tsc22d2 | Tsc22d2 | 4.98E-13 | 0.693672452 | 0.377 | 0.394 | 1.13E-08 | Astrocyte & NSC |
| Gabbr11 | Gabbr1 | 4.98E-13 | 0.432503125 | 0.544 | 0.652 | 1.13E-08 | Astrocyte & NSC |
| Stxbp4 | Stxbp4 | 5.45E-13 | 0.598925249 | 0.294 | 0.277 | 1.24E-08 | Astrocyte & NSC |
| Serinc11 | Serinc1 | 5.51E-13 | 0.477591209 | 0.486 | 0.549 | 1.25E-08 | Astrocyte & NSC |
| L3mbtl3 | L3mbtl3 | 9.79E-13 | 0.610762179 | 0.253 | 0.225 | 2.22E-08 | Astrocyte & NSC |
| Zfhx4 | Zfhx4 | 1.44E-12 | 0.746712241 | 0.347 | 0.349 | 3.28E-08 | Astrocyte & NSC |
| Kansl1l | Kansl1l | 1.92E-12 | 0.516344822 | 0.507 | 0.596 | 4.36E-08 | Astrocyte & NSC |
| Dclk2 | Dclk2 | 1.93E-12 | 0.907762681 | 0.465 | 0.556 | 4.38E-08 | Astrocyte & NSC |
| Phip | Phip | 7.01E-12 | 0.442410225 | 0.574 | 0.685 | 1.59E-07 | Astrocyte & NSC |
| Gpr881 | Gpr88 | 7.94E-12 | 0.485963098 | 0.503 | 0.578 | 1.80E-07 | Astrocyte & NSC |
| Ddx171 | Ddx17 | 1.45E-11 | 0.366878446 | 0.564 | 0.694 | 3.30E-07 | Astrocyte & NSC |
| Pbx3 | Pbx3 | 1.54E-11 | 1.196822006 | 0.534 | 0.717 | 3.50E-07 | Astrocyte & NSC |
| Pafah1b11 | Pafah1b1 | 1.70E-11 | 0.257372076 | 0.667 | 0.811 | 3.86E-07 | Astrocyte & NSC |
| Bmpr2 | Bmpr2 | 2.08E-11 | 0.483351423 | 0.489 | 0.571 | 4.73E-07 | Astrocyte & NSC |
| Asap1 | Asap1 | 2.17E-11 | 0.484200193 | 0.544 | 0.65 | 4.93E-07 | Astrocyte & NSC |
| Ptma1 | Ptma | 3.17E-11 | 0.434799329 | 0.329 | 0.31 | 7.20E-07 | Astrocyte & NSC |
| Tbl1xr1 | Tbl1xr1 | 4.56E-11 | 0.483513407 | 0.422 | 0.457 | 1.03E-06 | Astrocyte & NSC |
| Flrt2 | Flrt2 | 4.82E-11 | 0.609759747 | 0.299 | 0.462 | 1.09E-06 | Astrocyte & NSC |
| Epha31 | Epha3 | 5.99E-11 | 0.413261369 | 0.185 | 0.285 | 1.36E-06 | Astrocyte & NSC |
| Akap13 | Akap13 | 7.15E-11 | 0.388190416 | 0.28 | 0.251 | 1.63E-06 | Astrocyte & NSC |
| Ralgps2 | Ralgps2 | 7.90E-11 | 0.283773499 | 0.293 | 0.459 | 1.79E-06 | Astrocyte & NSC |
| Nlk | Nlk | 8.33E-11 | 0.34688827 | 0.513 | 0.76 | 1.89E-06 | Astrocyte & NSC |
| Ehmt1 | Ehmt1 | 1.10E-10 | 0.508076952 | 0.5 | 0.606 | 2.50E-06 | Astrocyte & NSC |
| Nfat5 | Nfat5 | 1.28E-10 | 0.400970069 | 0.591 | 0.725 | 2.90E-06 | Astrocyte & NSC |
| Nsd2 | Nsd2 | 1.64E-10 | 0.35611463 | 0.35 | 0.555 | 3.73E-06 | Astrocyte & NSC |
| Arhgap21 | Arhgap21 | 2.02E-10 | 0.472614872 | 0.513 | 0.617 | 4.59E-06 | Astrocyte & NSC |
| Hspa81 | Hspa8 | 2.60E-10 | 0.463383513 | 0.409 | 0.43 | 5.89E-06 | Astrocyte & NSC |
| Xpo1 | Xpo1 | 6.27E-10 | 0.561800802 | 0.316 | 0.318 | 1.42E-05 | Astrocyte & NSC |
| Gad1 | Gad1 | 1.12E-09 | 0.382413983 | 0.334 | 0.52 | 2.55E-05 | Astrocyte & NSC |
| Npepps | Npepps | 1.37E-09 | 0.359106485 | 0.574 | 0.705 | 3.12E-05 | Astrocyte & NSC |
| Gm42439 | Gm42439 | 2.09E-09 | 0.302485849 | 0.29 | 0.444 | 4.74E-05 | Astrocyte & NSC |
| Lin521 | Lin52 | 2.33E-09 | 0.513258398 | 0.35 | 0.362 | 5.29E-05 | Astrocyte & NSC |
| Wwox | Wwox | 2.62E-09 | 0.503091685 | 0.564 | 0.644 | 5.94E-05 | Astrocyte & NSC |
| Gad2 | Gad2 | 2.72E-09 | 0.285585229 | 0.448 | 0.679 | 6.18E-05 | Astrocyte & NSC |
| Snrnp70 | Snrnp70 | 3.13E-09 | 0.289876208 | 0.615 | 0.76 | 7.11E-05 | Astrocyte & NSC |
| Dpyd | Dpyd | 4.10E-09 | 0.334813784 | 0.352 | 0.326 | 9.32E-05 | Astrocyte & NSC |
| Chpt1 | Chpt1 | 4.23E-09 | 0.615910991 | 0.332 | 0.349 | 9.60E-05 | Astrocyte & NSC |
| Sorbs11 | Sorbs1 | 4.33E-09 | 0.339280374 | 0.707 | 0.765 | 9.83E-05 | Astrocyte & NSC |
| Igsf111 | Igsf11 | 4.55E-09 | 0.510375223 | 0.378 | 0.406 | 0.000103427 | Astrocyte & NSC |
| Gm21992 | Gm21992 | 5.56E-09 | 0.527056777 | 0.428 | 0.501 | 0.000126326 | Astrocyte & NSC |
| Kdm5b | Kdm5b | 6.85E-09 | 0.569447398 | 0.417 | 0.488 | 0.000155613 | Astrocyte & NSC |
| Tmem243 | Tmem243 | 1.47E-08 | 0.541917083 | 0.337 | 0.355 | 0.00033488 | Astrocyte & NSC |
| Kiz | Kiz | 1.83E-08 | 0.478830415 | 0.277 | 0.266 | 0.00041603 | Astrocyte & NSC |
| Smarcc2 | Smarcc2 | 1.85E-08 | 0.509964361 | 0.39 | 0.434 | 0.00042054 | Astrocyte & NSC |
| Camk2n1 | Camk2n1 | 2.34E-08 | 0.482391626 | 0.342 | 0.353 | 0.00053219 | Astrocyte & NSC |
| Arrb1 | Arrb1 | 2.48E-08 | 0.51901277 | 0.262 | 0.258 | 0.000563823 | Astrocyte & NSC |
| Camsap1 | Camsap1 | 5.98E-08 | 0.253701744 | 0.246 | 0.369 | 0.001358483 | Astrocyte & NSC |
| Ppia1 | Ppia | 6.07E-08 | 0.427470412 | 0.359 | 0.374 | 0.001377967 | Astrocyte & NSC |
| Khdrbs1 | Khdrbs1 | 8.60E-08 | 0.531867312 | 0.363 | 0.393 | 0.001953005 | Astrocyte & NSC |
| Ptpra1 | Ptpra | 1.10E-07 | 0.415352749 | 0.483 | 0.578 | 0.002491535 | Astrocyte & NSC |
| Ncor1 | Ncor1 | 1.13E-07 | 0.300107731 | 0.598 | 0.755 | 0.002576242 | Astrocyte & NSC |
| Fam172a | Fam172a | 1.38E-07 | 0.295309915 | 0.639 | 0.788 | 0.003133287 | Astrocyte & NSC |
| H3f3a1 | H3f3a | 1.59E-07 | 0.493484268 | 0.362 | 0.387 | 0.003609599 | Astrocyte & NSC |
| Dock11 | Dock11 | 2.17E-07 | 0.549903201 | 0.284 | 0.285 | 0.004939062 | Astrocyte & NSC |
| Psd31 | Psd3 | 2.19E-07 | 0.350378056 | 0.618 | 0.768 | 0.004976148 | Astrocyte & NSC |
| 4930517O19Rik | 4930517O19Rik | 2.55E-07 | 0.552897 | 0.266 | 0.261 | 0.005787731 | Astrocyte & NSC |
| Utrn | Utrn | 2.61E-07 | 0.430615692 | 0.472 | 0.543 | 0.005927403 | Astrocyte & NSC |
| Cblb1 | Cblb | 3.48E-07 | 0.500711984 | 0.316 | 0.327 | 0.007903158 | Astrocyte & NSC |
| Nme7 | Nme7 | 4.14E-07 | 0.573659577 | 0.394 | 0.458 | 0.009409649 | Astrocyte & NSC |
| Gtf2i | Gtf2i | 4.54E-07 | 0.395446859 | 0.507 | 0.622 | 0.01031359 | Astrocyte & NSC |
| Fam222b | Fam222b | 4.55E-07 | 0.261768229 | 0.306 | 0.455 | 0.010341635 | Astrocyte & NSC |
| Luc7l3 | Luc7l3 | 4.70E-07 | 0.459500545 | 0.458 | 0.554 | 0.010686023 | Astrocyte & NSC |
| Syt111 | Syt11 | 4.94E-07 | 0.337496513 | 0.55 | 0.674 | 0.011219528 | Astrocyte & NSC |
| Nrxn2 | Nrxn2 | 6.07E-07 | 0.419080904 | 0.44 | 0.5 | 0.013795905 | Astrocyte & NSC |
| Abi1 | Abi1 | 6.44E-07 | 0.436498991 | 0.49 | 0.608 | 0.014637077 | Astrocyte & NSC |
| Ldhb | Ldhb | 6.73E-07 | 0.48012703 | 0.36 | 0.392 | 0.015282256 | Astrocyte & NSC |
| Mgll | Mgll | 7.32E-07 | 0.722165787 | 0.359 | 0.4 | 0.016627221 | Astrocyte & NSC |
| Elf21 | Elf2 | 7.71E-07 | 0.396658527 | 0.267 | 0.252 | 0.017522934 | Astrocyte & NSC |
| Reep31 | Reep3 | 1.11E-06 | 0.427538535 | 0.267 | 0.256 | 0.025284979 | Astrocyte & NSC |
| Ghr | Ghr | 1.16E-06 | 0.548162878 | 0.414 | 0.469 | 0.026366629 | Astrocyte & NSC |
| Raf1 | Raf1 | 1.88E-06 | 0.252315356 | 0.313 | 0.464 | 0.042700569 | Astrocyte & NSC |
| Gabbr2 | Gabbr2 | 2.03E-06 | 0.862708477 | 0.357 | 0.407 | 0.046205324 | Astrocyte & NSC |
| 9330159F19Rik | 9330159F19Rik | 2.04E-06 | 0.507004297 | 0.312 | 0.331 | 0.046398626 | Astrocyte & NSC |
| Tshz1 | Tshz1 | 2.15E-06 | 0.693218261 | 0.26 | 0.252 | 0.048829707 | Astrocyte & NSC |
| Aldoa1 | Aldoa | 2.19E-06 | 0.439609143 | 0.325 | 0.335 | 0.049759322 | Astrocyte & NSC |
| Plekhm3 | Plekhm3 | 2.23E-06 | 0.273957636 | 0.371 | 0.557 | 0.050742064 | Astrocyte & NSC |
| Zfp7041 | Zfp704 | 2.45E-06 | 1.007685215 | 0.334 | 0.515 | 0.055599989 | Astrocyte & NSC |
| Mpped2 | Mpped2 | 2.46E-06 | 0.868444569 | 0.502 | 0.698 | 0.055817139 | Astrocyte & NSC |
| Smarca2 | Smarca2 | 3.31E-06 | 0.425330911 | 0.47 | 0.56 | 0.075173478 | Astrocyte & NSC |
| Atp5o | Atp5o | 3.42E-06 | 0.557104798 | 0.402 | 0.474 | 0.077708914 | Astrocyte & NSC |
| Pced1b | Pced1b | 3.46E-06 | 0.312538265 | 0.25 | 0.365 | 0.078676673 | Astrocyte & NSC |
| Plcg1 | Plcg1 | 4.31E-06 | 0.486109934 | 0.273 | 0.279 | 0.097802392 | Astrocyte & NSC |
| Actg11 | Actg1 | 4.37E-06 | 0.434077373 | 0.321 | 0.331 | 0.099255004 | Astrocyte & NSC |
| Gm26804 | Gm26804 | 5.96E-06 | 0.334266994 | 0.559 | 0.698 | 0.135358621 | Astrocyte & NSC |
| Sp4 | Sp4 | 6.43E-06 | 0.260801346 | 0.275 | 0.397 | 0.146060858 | Astrocyte & NSC |
| Cyp7b1 | Cyp7b1 | 8.23E-06 | 0.611088786 | 0.298 | 0.319 | 0.186961887 | Astrocyte & NSC |
| Lrrc58 | Lrrc58 | 9.27E-06 | 0.501167941 | 0.291 | 0.304 | 0.210651292 | Astrocyte & NSC |
| Rtn3 | Rtn3 | 9.30E-06 | 0.289248993 | 0.722 | 0.855 | 0.211330102 | Astrocyte & NSC |
| Zfand61 | Zfand6 | 1.20E-05 | 0.386435031 | 0.298 | 0.298 | 0.272843464 | Astrocyte & NSC |
| Pcdh10 | Pcdh10 | 1.42E-05 | 0.411478716 | 0.484 | 0.576 | 0.322092135 | Astrocyte & NSC |
| Gnb1 | Gnb1 | 1.59E-05 | 0.373192653 | 0.502 | 0.633 | 0.361520787 | Astrocyte & NSC |
| Xrn2 | Xrn2 | 1.76E-05 | 0.291466312 | 0.27 | 0.392 | 0.39925762 | Astrocyte & NSC |
| Lcorl | Lcorl | 2.23E-05 | 0.393895429 | 0.496 | 0.595 | 0.506585454 | Astrocyte & NSC |
| Ksr1 | Ksr1 | 2.31E-05 | 0.44733619 | 0.275 | 0.281 | 0.525700492 | Astrocyte & NSC |
| Hdac4 | Hdac4 | 2.47E-05 | 0.482941963 | 0.333 | 0.366 | 0.560350488 | Astrocyte & NSC |
| Mvb12b1 | Mvb12b | 3.45E-05 | 0.27305393 | 0.289 | 0.411 | 0.784395079 | Astrocyte & NSC |
| Rab11fip2 | Rab11fip2 | 3.58E-05 | 0.254680633 | 0.309 | 0.445 | 0.812788397 | Astrocyte & NSC |
| Kdm5a | Kdm5a | 3.76E-05 | 0.264044362 | 0.338 | 0.496 | 0.853499119 | Astrocyte & NSC |
| Rbm25 | Rbm25 | 5.14E-05 | 0.261217719 | 0.6 | 0.762 | 1 | Astrocyte & NSC |
| Rnf217 | Rnf217 | 5.40E-05 | 0.2705689 | 0.195 | 0.274 | 1 | Astrocyte & NSC |
| Galnt16 | Galnt16 | 5.49E-05 | 0.266829315 | 0.25 | 0.35 | 1 | Astrocyte & NSC |
| Pcgf51 | Pcgf5 | 5.95E-05 | 0.326603893 | 0.314 | 0.455 | 1 | Astrocyte & NSC |
| Cep128 | Cep128 | 6.22E-05 | 0.251433226 | 0.232 | 0.317 | 1 | Astrocyte & NSC |
| Atr | Atr | 6.26E-05 | 0.263964235 | 0.231 | 0.321 | 1 | Astrocyte & NSC |
| Snrk | Snrk | 7.05E-05 | 0.269005801 | 0.201 | 0.281 | 1 | Astrocyte & NSC |
| Tulp3 | Tulp3 | 8.00E-05 | 0.516706505 | 0.309 | 0.339 | 1 | Astrocyte & NSC |
| Insr1 | Insr | 8.22E-05 | 0.374672141 | 0.471 | 0.584 | 1 | Astrocyte & NSC |
| Lnpep | Lnpep | 9.64E-05 | 0.456405664 | 0.398 | 0.47 | 1 | Astrocyte & NSC |
| Prex1 | Prex1 | 0.000101668 | 0.38787902 | 0.273 | 0.275 | 1 | Astrocyte & NSC |
| Ctif | Ctif | 0.000113466 | 0.451511368 | 0.36 | 0.396 | 1 | Astrocyte & NSC |
| Rasa1 | Rasa1 | 0.000115266 | 0.269041315 | 0.328 | 0.474 | 1 | Astrocyte & NSC |
| Brd1 | Brd1 | 0.000121004 | 0.258345548 | 0.254 | 0.355 | 1 | Astrocyte & NSC |
| Fth11 | Fth1 | 0.000124992 | 0.301585721 | 0.43 | 0.487 | 1 | Astrocyte & NSC |
| Pbrm1 | Pbrm1 | 0.000161023 | 0.428362486 | 0.466 | 0.582 | 1 | Astrocyte & NSC |
| Evi5 | Evi5 | 0.000216252 | 0.256222593 | 0.307 | 0.435 | 1 | Astrocyte & NSC |
| Tardbp | Tardbp | 0.00026672 | 0.261026233 | 0.261 | 0.362 | 1 | Astrocyte & NSC |
| Osbpl9 | Osbpl9 | 0.000269853 | 0.368417998 | 0.523 | 0.657 | 1 | Astrocyte & NSC |
| Chd6 | Chd6 | 0.00030732 | 0.319892204 | 0.547 | 0.703 | 1 | Astrocyte & NSC |
| Sh3rf1 | Sh3rf1 | 0.00032385 | 0.513998464 | 0.316 | 0.345 | 1 | Astrocyte & NSC |
| Ino80dos | Ino80dos | 0.000323891 | 0.522754885 | 0.32 | 0.355 | 1 | Astrocyte & NSC |
| Uchl11 | Uchl1 | 0.000350849 | 0.260595673 | 0.256 | 0.355 | 1 | Astrocyte & NSC |
| Kmt2e | Kmt2e | 0.000357749 | 0.275519119 | 0.579 | 0.748 | 1 | Astrocyte & NSC |
| Dmtf1 | Dmtf1 | 0.00040538 | 0.258472156 | 0.282 | 0.394 | 1 | Astrocyte & NSC |
| Desi2 | Desi2 | 0.000442496 | 0.399866013 | 0.481 | 0.608 | 1 | Astrocyte & NSC |
| Ilf2 | Ilf2 | 0.000447662 | 0.263462551 | 0.2 | 0.274 | 1 | Astrocyte & NSC |
| Suz12 | Suz12 | 0.000484454 | 0.473714583 | 0.316 | 0.351 | 1 | Astrocyte & NSC |
| Smarcad1 | Smarcad1 | 0.000491812 | 0.313900781 | 0.305 | 0.436 | 1 | Astrocyte & NSC |
| Hnrnpr | Hnrnpr | 0.000511256 | 0.419572113 | 0.465 | 0.59 | 1 | Astrocyte & NSC |
| Dlx6os1 | Dlx6os1 | 0.000520538 | 1.820402812 | 0.283 | 0.424 | 1 | Astrocyte & NSC |
| Calm11 | Calm1 | 0.000525736 | 0.353884529 | 0.51 | 0.647 | 1 | Astrocyte & NSC |
| Jarid2 | Jarid2 | 0.000629363 | 0.41228479 | 0.489 | 0.619 | 1 | Astrocyte & NSC |
| Shoc2 | Shoc2 | 0.000636338 | 0.25159876 | 0.23 | 0.313 | 1 | Astrocyte & NSC |
| Slc38a1 | Slc38a1 | 0.000656244 | 0.497887337 | 0.259 | 0.367 | 1 | Astrocyte & NSC |
| Tbc1d9b | Tbc1d9b | 0.000659024 | 0.277056806 | 0.231 | 0.319 | 1 | Astrocyte & NSC |
| Cbfa2t2 | Cbfa2t2 | 0.00069793 | 0.277575983 | 0.366 | 0.53 | 1 | Astrocyte & NSC |
| E2f3 | E2f3 | 0.000707315 | 0.308660668 | 0.199 | 0.271 | 1 | Astrocyte & NSC |
| Penk | Penk | 0.00070794 | 0.28625755 | 0.469 | 0.538 | 1 | Astrocyte & NSC |
| Wsb1 | Wsb1 | 0.000744195 | 0.418762986 | 0.296 | 0.319 | 1 | Astrocyte & NSC |
| Tle1 | Tle1 | 0.000747068 | 0.538092059 | 0.372 | 0.442 | 1 | Astrocyte & NSC |
| Agpat3 | Agpat3 | 0.00081622 | 0.253534191 | 0.22 | 0.3 | 1 | Astrocyte & NSC |
| Coro2b | Coro2b | 0.000865489 | 0.272599456 | 0.318 | 0.453 | 1 | Astrocyte & NSC |
| Dync2h1 | Dync2h1 | 0.000890622 | 0.257041511 | 0.369 | 0.524 | 1 | Astrocyte & NSC |
| Srrm4 | Srrm4 | 0.000905734 | 0.501376452 | 0.21 | 0.286 | 1 | Astrocyte & NSC |
| Larp1 | Larp1 | 0.00096048 | 0.258007435 | 0.293 | 0.411 | 1 | Astrocyte & NSC |
| Bex2 | Bex2 | 0.000965922 | 0.396019941 | 0.295 | 0.315 | 1 | Astrocyte & NSC |
| Polr3h | Polr3h | 0.000986888 | 0.25077193 | 0.199 | 0.27 | 1 | Astrocyte & NSC |
| Sdc2 | Sdc2 | 0.001113179 | 0.281379264 | 0.291 | 0.403 | 1 | Astrocyte & NSC |
| Nt5c2 | Nt5c2 | 0.001121708 | 0.431753575 | 0.462 | 0.589 | 1 | Astrocyte & NSC |
| Ube2e1 | Ube2e1 | 0.001224803 | 0.250643014 | 0.191 | 0.257 | 1 | Astrocyte & NSC |
| Tab2 | Tab2 | 0.001336115 | 0.251147229 | 0.319 | 0.446 | 1 | Astrocyte & NSC |
| Ncor2 | Ncor2 | 0.001365597 | 0.303105328 | 0.242 | 0.332 | 1 | Astrocyte & NSC |
| Zfp609 | Zfp609 | 0.001404974 | 0.386534194 | 0.486 | 0.62 | 1 | Astrocyte & NSC |
| Mast2 | Mast2 | 0.001444648 | 0.323920723 | 0.348 | 0.493 | 1 | Astrocyte & NSC |
| Cdkal1 | Cdkal1 | 0.001454382 | 0.384039633 | 0.476 | 0.602 | 1 | Astrocyte & NSC |
| Leng8 | Leng8 | 0.00146436 | 0.445919967 | 0.309 | 0.347 | 1 | Astrocyte & NSC |
| Mras | Mras | 0.001509387 | 0.511999476 | 0.314 | 0.363 | 1 | Astrocyte & NSC |
| Suclg1 | Suclg1 | 0.001513979 | 0.284519577 | 0.194 | 0.264 | 1 | Astrocyte & NSC |
| 3110039M20Rik | 3110039M20Rik | 0.001516673 | 0.323219947 | 0.193 | 0.265 | 1 | Astrocyte & NSC |
| Eif4g11 | Eif4g1 | 0.001791957 | 0.250705244 | 0.291 | 0.4 | 1 | Astrocyte & NSC |
| Nckap1 | Nckap1 | 0.001885229 | 0.26038246 | 0.589 | 0.759 | 1 | Astrocyte & NSC |
| Tmed10 | Tmed10 | 0.001916464 | 0.272779315 | 0.237 | 0.316 | 1 | Astrocyte & NSC |
| Sos2 | Sos2 | 0.001957146 | 0.451229997 | 0.347 | 0.404 | 1 | Astrocyte & NSC |
| Itgb1 | Itgb1 | 0.002031906 | 0.257007499 | 0.2 | 0.266 | 1 | Astrocyte & NSC |
| Chd2 | Chd2 | 0.002068464 | 0.322551428 | 0.53 | 0.672 | 1 | Astrocyte & NSC |
| Sst | Sst | 0.002126766 | 0.36734313 | 0.251 | 0.257 | 1 | Astrocyte & NSC |
| Fzd3 | Fzd3 | 0.0021607 | 0.329880563 | 0.266 | 0.367 | 1 | Astrocyte & NSC |
| Rgs71 | Rgs7 | 0.002498314 | 0.263177759 | 0.574 | 0.755 | 1 | Astrocyte & NSC |
| Dido1 | Dido1 | 0.002584001 | 0.290625863 | 0.261 | 0.355 | 1 | Astrocyte & NSC |
| Foxo3 | Foxo3 | 0.002775616 | 0.268881573 | 0.272 | 0.37 | 1 | Astrocyte & NSC |
| Atrx | Atrx | 0.002846073 | 0.25915537 | 0.575 | 0.742 | 1 | Astrocyte & NSC |
| Ppp1r12b | Ppp1r12b | 0.00309175 | 0.324544534 | 0.474 | 0.683 | 1 | Astrocyte & NSC |
| Khdrbs3 | Khdrbs3 | 0.003128646 | 0.372980571 | 0.269 | 0.354 | 1 | Astrocyte & NSC |
| Tlk2 | Tlk2 | 0.003132555 | 0.278102646 | 0.341 | 0.48 | 1 | Astrocyte & NSC |
| Trim37 | Trim37 | 0.003236332 | 0.332803706 | 0.339 | 0.483 | 1 | Astrocyte & NSC |
| Pik3ca | Pik3ca | 0.00327451 | 0.268005226 | 0.301 | 0.415 | 1 | Astrocyte & NSC |
| Arhgap35 | Arhgap35 | 0.003522781 | 0.393008177 | 0.398 | 0.476 | 1 | Astrocyte & NSC |
| Shc31 | Shc3 | 0.00410378 | 0.343275045 | 0.331 | 0.463 | 1 | Astrocyte & NSC |
| AY036118 | AY036118 | 0.004201192 | 0.387348011 | 0.39 | 0.461 | 1 | Astrocyte & NSC |
| Klf9 | Klf9 | 0.004229762 | 0.476381934 | 0.332 | 0.384 | 1 | Astrocyte & NSC |
| Cox8a | Cox8a | 0.004243065 | 0.42217656 | 0.285 | 0.308 | 1 | Astrocyte & NSC |
| Srsf10 | Srsf10 | 0.004283469 | 0.283288961 | 0.234 | 0.314 | 1 | Astrocyte & NSC |
| Lamp2 | Lamp2 | 0.004476228 | 0.403019902 | 0.285 | 0.308 | 1 | Astrocyte & NSC |
| Ncdn | Ncdn | 0.004508363 | 0.260655037 | 0.279 | 0.374 | 1 | Astrocyte & NSC |
| Srsf31 | Srsf3 | 0.005117823 | 0.412138259 | 0.274 | 0.296 | 1 | Astrocyte & NSC |
| 2-Mar | 2-Mar | 0.005647226 | 0.257405198 | 0.212 | 0.279 | 1 | Astrocyte & NSC |
| Eif4g21 | Eif4g2 | 0.005763458 | 0.368973413 | 0.253 | 0.264 | 1 | Astrocyte & NSC |
| Mllt11 | Mllt11 | 0.006434195 | 0.286894161 | 0.194 | 0.256 | 1 | Astrocyte & NSC |
| Marcks | Marcks | 0.006591007 | 0.356099038 | 0.252 | 0.263 | 1 | Astrocyte & NSC |
| Ctcf | Ctcf | 0.006764758 | 0.290268567 | 0.247 | 0.329 | 1 | Astrocyte & NSC |
| Dcx | Dcx | 0.006951875 | 0.754151042 | 0.233 | 0.322 | 1 | Astrocyte & NSC |
| Pdcd4 | Pdcd4 | 0.00778752 | 0.456383166 | 0.296 | 0.335 | 1 | Astrocyte & NSC |
| Soga3 | Soga3 | 0.008486977 | 0.35599043 | 0.338 | 0.477 | 1 | Astrocyte & NSC |
| Pola1 | Pola1 | 0.008901651 | 0.609401372 | 0.242 | 0.33 | 1 | Astrocyte & NSC |
| Csnk1a1 | Csnk1a1 | 0.00908234 | 0.276022138 | 0.536 | 0.697 | 1 | Astrocyte & NSC |
| Epc2 | Epc2 | 0.009210446 | 0.280922619 | 0.267 | 0.357 | 1 | Astrocyte & NSC |
| Afg1l | Afg1l | 0.009380628 | 0.327240719 | 0.25 | 0.335 | 1 | Astrocyte & NSC |
| Cspp1 | Cspp1 | 0.009745466 | 0.361926129 | 0.497 | 0.639 | 1 | Astrocyte & NSC |
| Tmem131l | Tmem131l | 0.009983795 | 0.825978321 | 0.293 | 0.346 | 1 | Astrocyte & NSC |
| Ywhah | Ywhah | 0.009998955 | 0.25104181 | 0.216 | 0.278 | 1 | Astrocyte & NSC |
| Inpp5d | Inpp5d | 0 | 4.201843213 | 0.946 | 0.015 | 0 | Microglia |
| Tgfbr1 | Tgfbr1 | 0 | 4.000916134 | 0.923 | 0.087 | 0 | Microglia |
| Apbb1ip | Apbb1ip | 0 | 3.767627127 | 0.893 | 0.031 | 0 | Microglia |
| Hexb | Hexb | 0 | 3.707559498 | 0.907 | 0.08 | 0 | Microglia |
| Lrmda | Lrmda | 0 | 3.571282074 | 0.855 | 0.133 | 0 | Microglia |
| Ly86 | Ly86 | 0 | 3.56835254 | 0.79 | 0.013 | 0 | Microglia |
| Plxdc21 | Plxdc2 | 0 | 3.564394882 | 0.981 | 0.521 | 0 | Microglia |
| Pde3b | Pde3b | 0 | 3.412381696 | 0.893 | 0.279 | 0 | Microglia |
| Lyn | Lyn | 0 | 3.350275997 | 0.853 | 0.173 | 0 | Microglia |
| Epb41l2 | Epb41l2 | 0 | 3.322333694 | 0.921 | 0.263 | 0 | Microglia |
| Dock8 | Dock8 | 0 | 3.312321774 | 0.79 | 0.03 | 0 | Microglia |
| Siglech | Siglech | 0 | 3.311569907 | 0.75 | 0.009 | 0 | Microglia |
| Cfh | Cfh | 0 | 3.250562381 | 0.769 | 0.016 | 0 | Microglia |
| Ikzf1 | Ikzf1 | 0 | 3.220856172 | 0.757 | 0.032 | 0 | Microglia |
| Mertk1 | Mertk | 0 | 3.184391098 | 0.93 | 0.127 | 0 | Microglia |
| Fyb | Fyb | 0 | 3.131472981 | 0.738 | 0.031 | 0 | Microglia |
| Runx1 | Runx1 | 0 | 3.098160724 | 0.714 | 0.005 | 0 | Microglia |
| Srgap2 | Srgap2 | 0 | 3.079454778 | 0.972 | 0.676 | 0 | Microglia |
| Fli1 | Fli1 | 0 | 3.03501828 | 0.757 | 0.015 | 0 | Microglia |
| P2ry12 | P2ry12 | 0 | 3.029186014 | 0.787 | 0.161 | 0 | Microglia |
| Dock2 | Dock2 | 0 | 3.025386449 | 0.76 | 0.065 | 0 | Microglia |
| Slco2b1 | Slco2b1 | 0 | 2.957347955 | 0.697 | 0.011 | 0 | Microglia |
| Rreb11 | Rreb1 | 0 | 2.94903628 | 0.812 | 0.194 | 0 | Microglia |
| Adap2 | Adap2 | 0 | 2.919405099 | 0.716 | 0.009 | 0 | Microglia |
| Lair1 | Lair1 | 0 | 2.901472345 | 0.709 | 0.041 | 0 | Microglia |
| Selplg | Selplg | 0 | 2.86456383 | 0.679 | 0.026 | 0 | Microglia |
| Tmcc31 | Tmcc3 | 0 | 2.854078896 | 0.919 | 0.437 | 0 | Microglia |
| Pag1 | Pag1 | 0 | 2.836419917 | 0.859 | 0.341 | 0 | Microglia |
| Cx3cr1 | Cx3cr1 | 0 | 2.83599793 | 0.708 | 0.087 | 0 | Microglia |
| Csf1r | Csf1r | 0 | 2.806167926 | 0.689 | 0.031 | 0 | Microglia |
| Arhgap45 | Arhgap45 | 0 | 2.799572173 | 0.686 | 0.003 | 0 | Microglia |
| Hpgds | Hpgds | 0 | 2.79277551 | 0.714 | 0.136 | 0 | Microglia |
| Itgb5 | Itgb5 | 0 | 2.768332565 | 0.673 | 0.045 | 0 | Microglia |
| Lpcat2 | Lpcat2 | 0 | 2.715681101 | 0.692 | 0.084 | 0 | Microglia |
| Lgmn | Lgmn | 0 | 2.694752087 | 0.716 | 0.171 | 0 | Microglia |
| Zfhx3 | Zfhx3 | 0 | 2.668077004 | 0.954 | 0.519 | 0 | Microglia |
| Zfp710 | Zfp710 | 0 | 2.64947414 | 0.752 | 0.234 | 0 | Microglia |
| Entpd1 | Entpd1 | 0 | 2.551822986 | 0.621 | 0.071 | 0 | Microglia |
| Myo1f | Myo1f | 0 | 2.519140026 | 0.581 | 0.006 | 0 | Microglia |
| Agmo1 | Agmo | 0 | 2.465789719 | 0.664 | 0.1 | 0 | Microglia |
| P3h2 | P3h2 | 0 | 2.463156706 | 0.553 | 0.051 | 0 | Microglia |
| Fgd2 | Fgd2 | 0 | 2.429274507 | 0.567 | 0.004 | 0 | Microglia |
| Csf3r | Csf3r | 0 | 2.418457207 | 0.548 | 0.004 | 0 | Microglia |
| 8030442B05Rik | 8030442B05Rik | 0 | 2.417530675 | 0.509 | 0.009 | 0 | Microglia |
| Tgfbr2 | Tgfbr2 | 0 | 2.409292412 | 0.589 | 0.034 | 0 | Microglia |
| Tbxas1 | Tbxas1 | 0 | 2.389022945 | 0.531 | 0.013 | 0 | Microglia |
| St3gal6 | St3gal6 | 0 | 2.38848339 | 0.583 | 0.072 | 0 | Microglia |
| Ankrd441 | Ankrd44 | 0 | 2.373425766 | 0.741 | 0.192 | 0 | Microglia |
| 0610040J01Rik | 0610040J01Rik | 0 | 2.369176033 | 0.569 | 0.04 | 0 | Microglia |
| Rgs10 | Rgs10 | 0 | 2.340779943 | 0.588 | 0.112 | 0 | Microglia |
| Ccnd31 | Ccnd3 | 0 | 2.330340082 | 0.586 | 0.097 | 0 | Microglia |
| Nckap1l | Nckap1l | 0 | 2.279963441 | 0.539 | 0.01 | 0 | Microglia |
| Unc93b1 | Unc93b1 | 0 | 2.264392257 | 0.526 | 0.023 | 0 | Microglia |
| Ptprc | Ptprc | 0 | 2.261477855 | 0.485 | 0.005 | 0 | Microglia |
| Elmo11 | Elmo1 | 0 | 2.244339581 | 0.987 | 0.815 | 0 | Microglia |
| Rasgrp31 | Rasgrp3 | 0 | 2.230982789 | 0.57 | 0.055 | 0 | Microglia |
| Maf | Maf | 0 | 2.21025444 | 0.513 | 0.038 | 0 | Microglia |
| Blnk | Blnk | 0 | 2.209770988 | 0.483 | 0.004 | 0 | Microglia |
| Abca9 | Abca9 | 0 | 2.201548571 | 0.52 | 0.006 | 0 | Microglia |
| Gm5086 | Gm5086 | 0 | 2.196998777 | 0.464 | 0.008 | 0 | Microglia |
| Cd180 | Cd180 | 0 | 2.162879204 | 0.483 | 0.039 | 0 | Microglia |
| Tanc2 | Tanc2 | 0 | 2.154098521 | 0.987 | 0.84 | 0 | Microglia |
| Il6ra | Il6ra | 0 | 2.137459823 | 0.499 | 0.013 | 0 | Microglia |
| Ctss | Ctss | 0 | 2.108034845 | 0.469 | 0.025 | 0 | Microglia |
| Arhgap22 | Arhgap22 | 0 | 2.086912634 | 0.476 | 0.043 | 0 | Microglia |
| Pik3ap1 | Pik3ap1 | 0 | 2.082730971 | 0.458 | 0.003 | 0 | Microglia |
| Anxa3 | Anxa3 | 0 | 2.02645055 | 0.442 | 0.011 | 0 | Microglia |
| Plcg2 | Plcg2 | 0 | 2.011257679 | 0.45 | 0.013 | 0 | Microglia |
| Bank1 | Bank1 | 0 | 1.967081082 | 0.376 | 0.019 | 0 | Microglia |
| Cd84 | Cd84 | 0 | 1.935441619 | 0.404 | 0.006 | 0 | Microglia |
| Fcrls | Fcrls | 0 | 1.929886156 | 0.406 | 0.014 | 0 | Microglia |
| Lhfpl2 | Lhfpl2 | 0 | 1.928309416 | 0.422 | 0.049 | 0 | Microglia |
| Gpr34 | Gpr34 | 0 | 1.909756244 | 0.412 | 0.028 | 0 | Microglia |
| Cyth4 | Cyth4 | 0 | 1.90364076 | 0.401 | 0.005 | 0 | Microglia |
| Rbm47 | Rbm47 | 0 | 1.900697617 | 0.393 | 0.002 | 0 | Microglia |
| Cdh23 | Cdh23 | 0 | 1.865880603 | 0.385 | 0.008 | 0 | Microglia |
| Pros1 | Pros1 | 0 | 1.847209899 | 0.406 | 0.038 | 0 | Microglia |
| Capn3 | Capn3 | 0 | 1.844548279 | 0.363 | 0.007 | 0 | Microglia |
| Ptgs1 | Ptgs1 | 0 | 1.819944494 | 0.395 | 0.012 | 0 | Microglia |
| Hpgd | Hpgd | 0 | 1.799647305 | 0.354 | 0.009 | 0 | Microglia |
| Abi3 | Abi3 | 0 | 1.791586335 | 0.354 | 0.002 | 0 | Microglia |
| Lrrk1 | Lrrk1 | 0 | 1.776756395 | 0.392 | 0.018 | 0 | Microglia |
| Cd86 | Cd86 | 0 | 1.774088773 | 0.357 | 0.003 | 0 | Microglia |
| Nlrp1b | Nlrp1b | 0 | 1.76768498 | 0.355 | 0.005 | 0 | Microglia |
| Col27a1 | Col27a1 | 0 | 1.765193859 | 0.427 | 0.036 | 0 | Microglia |
| Sall1 | Sall1 | 0 | 1.755156388 | 0.401 | 0.036 | 0 | Microglia |
| Bin2 | Bin2 | 0 | 1.738949984 | 0.354 | 0.002 | 0 | Microglia |
| Fermt3 | Fermt3 | 0 | 1.729942237 | 0.348 | 0.01 | 0 | Microglia |
| Vsir | Vsir | 0 | 1.709153191 | 0.368 | 0.014 | 0 | Microglia |
| Cflar | Cflar | 0 | 1.706824335 | 0.389 | 0.043 | 0 | Microglia |
| Pla2g4a | Pla2g4a | 0 | 1.699388621 | 0.379 | 0.037 | 0 | Microglia |
| Cdk6 | Cdk6 | 0 | 1.692087065 | 0.355 | 0.031 | 0 | Microglia |
| Spi1 | Spi1 | 0 | 1.68865402 | 0.357 | 0.003 | 0 | Microglia |
| Nrros | Nrros | 0 | 1.678478427 | 0.362 | 0.03 | 0 | Microglia |
| A830008E24Rik | A830008E24Rik | 0 | 1.634854945 | 0.278 | 0.006 | 0 | Microglia |
| Il10ra | Il10ra | 0 | 1.631947359 | 0.333 | 0.006 | 0 | Microglia |
| Wdfy4 | Wdfy4 | 0 | 1.619846979 | 0.316 | 0.004 | 0 | Microglia |
| Rhoh | Rhoh | 0 | 1.61040583 | 0.318 | 0.002 | 0 | Microglia |
| Mir142hg | Mir142hg | 0 | 1.606018179 | 0.322 | 0.005 | 0 | Microglia |
| Elf4 | Elf4 | 0 | 1.600107775 | 0.294 | 0.005 | 0 | Microglia |
| Lcp2 | Lcp2 | 0 | 1.596433374 | 0.332 | 0.006 | 0 | Microglia |
| Adap2os | Adap2os | 0 | 1.591671069 | 0.319 | 0.004 | 0 | Microglia |
| Slc7a7 | Slc7a7 | 0 | 1.549586399 | 0.319 | 0.01 | 0 | Microglia |
| Golm1 | Golm1 | 0 | 1.542696796 | 0.311 | 0.018 | 0 | Microglia |
| P2ry6 | P2ry6 | 0 | 1.537754293 | 0.327 | 0.002 | 0 | Microglia |
| Ccr5 | Ccr5 | 0 | 1.52943015 | 0.308 | 0.015 | 0 | Microglia |
| Cd37 | Cd37 | 0 | 1.522658292 | 0.313 | 0.003 | 0 | Microglia |
| Rcsd1 | Rcsd1 | 0 | 1.513633106 | 0.303 | 0.017 | 0 | Microglia |
| Havcr2 | Havcr2 | 0 | 1.466595711 | 0.275 | 0.003 | 0 | Microglia |
| Vav1 | Vav1 | 0 | 1.455162815 | 0.3 | 0.001 | 0 | Microglia |
| Arhgap25 | Arhgap25 | 0 | 1.433993171 | 0.283 | 0.005 | 0 | Microglia |
| Tgfb1 | Tgfb1 | 0 | 1.422643424 | 0.261 | 0.005 | 0 | Microglia |
| F11r | F11r | 0 | 1.402375159 | 0.28 | 0.009 | 0 | Microglia |
| Prkcd | Prkcd | 0 | 1.398892599 | 0.283 | 0.017 | 0 | Microglia |
| Frrs1 | Frrs1 | 0 | 1.37565103 | 0.272 | 0.011 | 0 | Microglia |
| Cmtm7 | Cmtm7 | 0 | 1.367085056 | 0.264 | 0.013 | 0 | Microglia |
| Syk | Syk | 0 | 1.363543956 | 0.251 | 0.002 | 0 | Microglia |
| Casp8 | Casp8 | 0 | 1.354857318 | 0.265 | 0.007 | 0 | Microglia |
| Cd33 | Cd33 | 0 | 1.34420524 | 0.261 | 0.003 | 0 | Microglia |
| Hk2 | Hk2 | 0 | 1.328791979 | 0.264 | 0.002 | 0 | Microglia |
| Pik3r5 | Pik3r5 | 0 | 1.317896087 | 0.25 | 0.01 | 0 | Microglia |
| A630001G21Rik | A630001G21Rik | 0 | 1.312747773 | 0.261 | 0.002 | 0 | Microglia |
| Sla | Sla | 0 | 1.242138851 | 0.25 | 0.004 | 0 | Microglia |
| Mef2a | Mef2a | 1.09E-306 | 2.590233143 | 0.945 | 0.674 | 2.47E-302 | Microglia |
| Fmnl3 | Fmnl3 | 7.47E-304 | 1.570820503 | 0.348 | 0.034 | 1.70E-299 | Microglia |
| Mylip | Mylip | 3.33E-294 | 2.095299187 | 0.504 | 0.087 | 7.56E-290 | Microglia |
| Ldlrad4 | Ldlrad4 | 5.83E-293 | 2.463200169 | 0.945 | 0.62 | 1.33E-288 | Microglia |
| Nfatc1 | Nfatc1 | 2.36E-287 | 1.278158501 | 0.256 | 0.018 | 5.35E-283 | Microglia |
| Itga61 | Itga6 | 3.18E-278 | 1.937731873 | 0.485 | 0.08 | 7.21E-274 | Microglia |
| Maml3 | Maml3 | 4.44E-276 | 2.395481084 | 0.893 | 0.455 | 1.01E-271 | Microglia |
| Numb | Numb | 4.68E-274 | 2.743865568 | 0.886 | 0.532 | 1.06E-269 | Microglia |
| Nav2 | Nav2 | 1.24E-272 | 2.411229469 | 0.945 | 0.725 | 2.81E-268 | Microglia |
| Pik3cd | Pik3cd | 1.02E-270 | 1.710412939 | 0.376 | 0.048 | 2.31E-266 | Microglia |
| Skap2 | Skap2 | 4.96E-263 | 2.12212016 | 0.624 | 0.16 | 1.13E-258 | Microglia |
| Pld11 | Pld1 | 2.99E-262 | 1.76431767 | 0.515 | 0.095 | 6.80E-258 | Microglia |
| Mef2c | Mef2c | 2.46E-257 | 2.413514595 | 0.902 | 0.586 | 5.58E-253 | Microglia |
| Slc8a11 | Slc8a1 | 1.02E-253 | 2.166383417 | 0.945 | 0.554 | 2.33E-249 | Microglia |
| Rps6ka1 | Rps6ka1 | 2.99E-246 | 1.534022699 | 0.319 | 0.037 | 6.79E-242 | Microglia |
| Dapp1 | Dapp1 | 1.56E-243 | 1.557277378 | 0.359 | 0.047 | 3.55E-239 | Microglia |
| Ubash3b1 | Ubash3b | 2.12E-236 | 2.26265327 | 0.712 | 0.24 | 4.81E-232 | Microglia |
| 4933406I18Rik | 4933406I18Rik | 2.19E-236 | 2.673904448 | 0.769 | 0.356 | 4.97E-232 | Microglia |
| Sirpa | Sirpa | 4.17E-234 | 2.370550144 | 0.791 | 0.385 | 9.47E-230 | Microglia |
| Mbnl11 | Mbnl1 | 4.55E-234 | 2.194024359 | 0.896 | 0.669 | 1.03E-229 | Microglia |
| Lcp1 | Lcp1 | 1.51E-232 | 1.360369378 | 0.275 | 0.027 | 3.42E-228 | Microglia |
| C1qb | C1qb | 5.21E-231 | 1.27953223 | 0.273 | 0.028 | 1.18E-226 | Microglia |
| Slc9a91 | Slc9a9 | 1.26E-223 | 2.237709637 | 0.798 | 0.367 | 2.85E-219 | Microglia |
| Bmp2k1 | Bmp2k | 4.35E-222 | 1.991191343 | 0.615 | 0.176 | 9.89E-218 | Microglia |
| Dock4 | Dock4 | 1.02E-219 | 1.634758097 | 0.954 | 0.843 | 2.31E-215 | Microglia |
| Foxn32 | Foxn3 | 2.71E-218 | 2.051982249 | 0.886 | 0.543 | 6.16E-214 | Microglia |
| Wasf2 | Wasf2 | 1.27E-216 | 2.172863508 | 0.682 | 0.249 | 2.88E-212 | Microglia |
| Tns31 | Tns3 | 1.86E-214 | 1.662829976 | 0.553 | 0.136 | 4.23E-210 | Microglia |
| Vrk2 | Vrk2 | 9.68E-214 | 1.600073793 | 0.359 | 0.055 | 2.20E-209 | Microglia |
| Ophn1 | Ophn1 | 8.37E-211 | 2.408791939 | 0.807 | 0.482 | 1.90E-206 | Microglia |
| Chd91 | Chd9 | 1.12E-208 | 1.767219947 | 0.907 | 0.779 | 2.55E-204 | Microglia |
| Rapgef5 | Rapgef5 | 4.74E-208 | 2.256441008 | 0.82 | 0.494 | 1.08E-203 | Microglia |
| Snx291 | Snx29 | 4.77E-208 | 2.213054766 | 0.837 | 0.541 | 1.08E-203 | Microglia |
| Sipa1l2 | Sipa1l2 | 3.01E-207 | 1.676586312 | 0.423 | 0.081 | 6.83E-203 | Microglia |
| Inpp4b1 | Inpp4b | 2.76E-205 | 1.837312723 | 0.803 | 0.346 | 6.26E-201 | Microglia |
| P2rx7 | P2rx7 | 7.27E-202 | 1.47909249 | 0.343 | 0.052 | 1.65E-197 | Microglia |
| Rhobtb1 | Rhobtb1 | 1.35E-199 | 1.502596738 | 0.327 | 0.049 | 3.07E-195 | Microglia |
| Fam105a | Fam105a | 5.07E-197 | 2.134222017 | 0.618 | 0.219 | 1.15E-192 | Microglia |
| Serinc3 | Serinc3 | 1.06E-196 | 2.111612006 | 0.692 | 0.287 | 2.41E-192 | Microglia |
| Tnfrsf11a | Tnfrsf11a | 1.42E-195 | 1.711951706 | 0.325 | 0.05 | 3.23E-191 | Microglia |
| Nek7 | Nek7 | 1.71E-195 | 1.974462372 | 0.564 | 0.162 | 3.89E-191 | Microglia |
| Gm424182 | Gm42418 | 2.10E-195 | 1.283046643 | 1 | 0.999 | 4.76E-191 | Microglia |
| Pip4k2a1 | Pip4k2a | 7.73E-194 | 2.006752743 | 0.812 | 0.454 | 1.75E-189 | Microglia |
| Gab2 | Gab2 | 9.43E-194 | 2.216492209 | 0.796 | 0.453 | 2.14E-189 | Microglia |
| Ptprj | Ptprj | 4.64E-193 | 2.168778775 | 0.842 | 0.596 | 1.05E-188 | Microglia |
| Hck | Hck | 8.79E-188 | 1.700041384 | 0.363 | 0.066 | 2.00E-183 | Microglia |
| Itpr21 | Itpr2 | 4.75E-186 | 1.544809174 | 0.491 | 0.116 | 1.08E-181 | Microglia |
| Fam49b | Fam49b | 1.73E-181 | 1.74021455 | 0.864 | 0.703 | 3.93E-177 | Microglia |
| Whrn | Whrn | 1.49E-178 | 1.608689457 | 0.36 | 0.067 | 3.39E-174 | Microglia |
| Irak2 | Irak2 | 2.78E-178 | 1.665332535 | 0.444 | 0.103 | 6.31E-174 | Microglia |
| Plekho1 | Plekho1 | 4.77E-177 | 1.477114402 | 0.333 | 0.057 | 1.08E-172 | Microglia |
| Lrch1 | Lrch1 | 9.94E-177 | 2.118366125 | 0.777 | 0.489 | 2.26E-172 | Microglia |
| Nav3 | Nav3 | 9.88E-175 | 1.620595201 | 0.942 | 0.781 | 2.24E-170 | Microglia |
| Cttnbp2nl | Cttnbp2nl | 1.14E-172 | 1.994666597 | 0.57 | 0.196 | 2.59E-168 | Microglia |
| Gmip | Gmip | 5.67E-171 | 1.285741211 | 0.278 | 0.04 | 1.29E-166 | Microglia |
| Rrbp1 | Rrbp1 | 3.58E-168 | 1.820541034 | 0.532 | 0.165 | 8.13E-164 | Microglia |
| Ssh21 | Ssh2 | 6.09E-158 | 1.473606413 | 0.899 | 0.826 | 1.38E-153 | Microglia |
| Zeb22 | Zeb2 | 5.48E-156 | 1.34808669 | 0.875 | 0.411 | 1.25E-151 | Microglia |
| B4galt1 | B4galt1 | 1.33E-155 | 1.494598467 | 0.336 | 0.066 | 3.02E-151 | Microglia |
| Arhgap51 | Arhgap5 | 5.33E-143 | 1.842852841 | 0.798 | 0.583 | 1.21E-138 | Microglia |
| Fchsd21 | Fchsd2 | 3.97E-139 | 1.759347337 | 0.828 | 0.707 | 9.03E-135 | Microglia |
| Mgat4a | Mgat4a | 2.45E-138 | 2.091840814 | 0.586 | 0.261 | 5.57E-134 | Microglia |
| Dip2b1 | Dip2b | 1.99E-136 | 1.557488542 | 0.831 | 0.689 | 4.52E-132 | Microglia |
| Camk2d1 | Camk2d | 1.34E-135 | 1.627664188 | 0.687 | 0.329 | 3.04E-131 | Microglia |
| Smap2 | Smap2 | 5.99E-131 | 1.970343286 | 0.654 | 0.365 | 1.36E-126 | Microglia |
| Qk2 | Qk | 3.76E-129 | 1.091353624 | 0.956 | 0.756 | 8.53E-125 | Microglia |
| Etv61 | Etv6 | 2.17E-128 | 1.770459994 | 0.627 | 0.313 | 4.92E-124 | Microglia |
| Cyfip1 | Cyfip1 | 1.17E-127 | 1.922675434 | 0.648 | 0.356 | 2.65E-123 | Microglia |
| Soga1 | Soga1 | 7.09E-125 | 1.690223672 | 0.521 | 0.198 | 1.61E-120 | Microglia |
| Chn21 | Chn2 | 3.76E-122 | 1.754889068 | 0.664 | 0.364 | 8.54E-118 | Microglia |
| Dennd4a | Dennd4a | 6.55E-121 | 1.728923549 | 0.76 | 0.619 | 1.49E-116 | Microglia |
| Vav2 | Vav2 | 7.15E-121 | 1.167300604 | 0.261 | 0.049 | 1.63E-116 | Microglia |
| Ivns1abp | Ivns1abp | 7.47E-120 | 1.809073857 | 0.638 | 0.36 | 1.70E-115 | Microglia |
| Akap131 | Akap13 | 1.49E-119 | 1.752859348 | 0.553 | 0.242 | 3.39E-115 | Microglia |
| Plcl21 | Plcl2 | 5.08E-119 | 1.46688995 | 0.81 | 0.654 | 1.15E-114 | Microglia |
| Fam102b | Fam102b | 2.74E-117 | 1.872774904 | 0.607 | 0.317 | 6.22E-113 | Microglia |
| Csmd31 | Csmd3 | 7.43E-115 | 1.165413783 | 0.961 | 0.918 | 1.69E-110 | Microglia |
| Abca11 | Abca1 | 1.72E-114 | 1.459467815 | 0.476 | 0.162 | 3.91E-110 | Microglia |
| Slc16a6 | Slc16a6 | 1.54E-112 | 1.620203495 | 0.397 | 0.124 | 3.50E-108 | Microglia |
| Ppm1h | Ppm1h | 3.88E-112 | 1.796408625 | 0.673 | 0.446 | 8.81E-108 | Microglia |
| Gsap | Gsap | 9.51E-110 | 1.242308179 | 0.295 | 0.067 | 2.16E-105 | Microglia |
| Frmd4b1 | Frmd4b | 1.32E-107 | 1.26105737 | 0.823 | 0.642 | 3.00E-103 | Microglia |
| Disc1 | Disc1 | 1.56E-106 | 1.389680035 | 0.34 | 0.093 | 3.53E-102 | Microglia |
| Rin2 | Rin2 | 2.74E-106 | 1.325690033 | 0.346 | 0.094 | 6.23E-102 | Microglia |
| Maml21 | Maml2 | 2.78E-105 | 1.282913684 | 0.695 | 0.339 | 6.32E-101 | Microglia |
| Wnk11 | Wnk1 | 2.55E-104 | 1.303262691 | 0.812 | 0.732 | 5.78E-100 | Microglia |
| Picalm1 | Picalm | 1.35E-102 | 1.637852229 | 0.733 | 0.575 | 3.07E-98 | Microglia |
| Nrip1 | Nrip1 | 2.14E-102 | 1.753294235 | 0.559 | 0.286 | 4.85E-98 | Microglia |
| Atp8a21 | Atp8a2 | 1.67E-100 | 1.571706481 | 0.716 | 0.561 | 3.78E-96 | Microglia |
| Sparc | Sparc | 3.81E-100 | 1.137435789 | 0.272 | 0.061 | 8.66E-96 | Microglia |
| Hdac91 | Hdac9 | 3.77E-98 | 1.408627212 | 0.78 | 0.603 | 8.55E-94 | Microglia |
| Cst32 | Cst3 | 4.78E-97 | 1.439824643 | 0.75 | 0.563 | 1.09E-92 | Microglia |
| Itga9 | Itga9 | 1.00E-96 | 1.642825315 | 0.457 | 0.186 | 2.28E-92 | Microglia |
| Camk1 | Camk1 | 3.56E-96 | 1.339298406 | 0.319 | 0.089 | 8.09E-92 | Microglia |
| Rap1gds1 | Rap1gds1 | 4.34E-94 | 1.455063732 | 0.731 | 0.626 | 9.86E-90 | Microglia |
| Lysmd4 | Lysmd4 | 4.34E-93 | 1.766187023 | 0.611 | 0.393 | 9.86E-89 | Microglia |
| Camk1d | Camk1d | 1.12E-90 | 1.089173005 | 0.845 | 0.833 | 2.54E-86 | Microglia |
| 4930444A19Rik | 4930444A19Rik | 4.05E-89 | 1.18737983 | 0.259 | 0.062 | 9.21E-85 | Microglia |
| Cmss12 | Cmss1 | 1.09E-88 | 1.052534524 | 0.877 | 0.883 | 2.48E-84 | Microglia |
| Ttc281 | Ttc28 | 1.41E-85 | 1.328549457 | 0.556 | 0.27 | 3.19E-81 | Microglia |
| Heatr5a | Heatr5a | 1.50E-85 | 1.429408884 | 0.348 | 0.114 | 3.40E-81 | Microglia |
| Jmjd1c | Jmjd1c | 2.75E-85 | 1.180178365 | 0.798 | 0.778 | 6.25E-81 | Microglia |
| Asap11 | Asap1 | 4.80E-84 | 1.387534239 | 0.727 | 0.631 | 1.09E-79 | Microglia |
| Lims11 | Lims1 | 2.19E-83 | 1.52566699 | 0.6 | 0.367 | 4.98E-79 | Microglia |
| Arhgap31 | Arhgap31 | 1.87E-82 | 1.161437453 | 0.322 | 0.094 | 4.24E-78 | Microglia |
| Stard91 | Stard9 | 3.52E-80 | 1.303813406 | 0.422 | 0.168 | 8.00E-76 | Microglia |
| Pnpla71 | Pnpla7 | 5.56E-80 | 1.457077811 | 0.488 | 0.23 | 1.26E-75 | Microglia |
| Il6st | Il6st | 5.61E-80 | 1.380581291 | 0.367 | 0.135 | 1.28E-75 | Microglia |
| Nuak1 | Nuak1 | 5.88E-80 | 1.389154559 | 0.348 | 0.122 | 1.33E-75 | Microglia |
| Abhd12 | Abhd12 | 2.19E-79 | 1.712960757 | 0.599 | 0.412 | 4.96E-75 | Microglia |
| Slc7a8 | Slc7a8 | 2.12E-78 | 1.809557881 | 0.518 | 0.297 | 4.81E-74 | Microglia |
| Tspan141 | Tspan14 | 3.02E-78 | 1.30783236 | 0.34 | 0.114 | 6.87E-74 | Microglia |
| Ints6l | Ints6l | 2.99E-76 | 1.582623394 | 0.619 | 0.456 | 6.79E-72 | Microglia |
| Plcl11 | Plcl1 | 2.17E-75 | 0.506236268 | 0.84 | 0.563 | 4.92E-71 | Microglia |
| Pou2f2 | Pou2f2 | 1.40E-74 | 1.632314351 | 0.483 | 0.26 | 3.19E-70 | Microglia |
| Basp1 | Basp1 | 3.88E-74 | 1.569472766 | 0.589 | 0.395 | 8.81E-70 | Microglia |
| Gng2 | Gng2 | 2.45E-73 | 1.345331202 | 0.398 | 0.164 | 5.56E-69 | Microglia |
| Gm351881 | Gm35188 | 3.07E-73 | 1.603783462 | 0.605 | 0.406 | 6.96E-69 | Microglia |
| Prex11 | Prex1 | 1.04E-71 | 1.45933026 | 0.494 | 0.265 | 2.37E-67 | Microglia |
| Nfia2 | Nfia | 1.42E-71 | 0.802868483 | 0.749 | 0.416 | 3.24E-67 | Microglia |
| Crlf31 | Crlf3 | 3.89E-69 | 1.283866143 | 0.439 | 0.199 | 8.83E-65 | Microglia |
| Stk10 | Stk10 | 1.26E-68 | 1.241790504 | 0.265 | 0.081 | 2.87E-64 | Microglia |
| Zfp652 | Zfp652 | 2.93E-68 | 1.569139788 | 0.589 | 0.43 | 6.65E-64 | Microglia |
| Arhgap17 | Arhgap17 | 2.68E-66 | 1.541822252 | 0.512 | 0.309 | 6.10E-62 | Microglia |
| Gtf2h2 | Gtf2h2 | 8.19E-65 | 1.492270037 | 0.49 | 0.287 | 1.86E-60 | Microglia |
| Acer3 | Acer3 | 9.08E-65 | 1.506951444 | 0.536 | 0.35 | 2.06E-60 | Microglia |
| Macf11 | Macf1 | 1.61E-64 | 0.652719499 | 0.912 | 0.918 | 3.65E-60 | Microglia |
| Rp2 | Rp2 | 4.97E-64 | 1.178441792 | 0.273 | 0.09 | 1.13E-59 | Microglia |
| Cryl1 | Cryl1 | 1.40E-63 | 1.228316439 | 0.3 | 0.108 | 3.17E-59 | Microglia |
| Acss11 | Acss1 | 3.57E-63 | 1.07269255 | 0.31 | 0.105 | 8.11E-59 | Microglia |
| Diaph21 | Diaph2 | 7.41E-63 | 1.021356824 | 0.79 | 0.774 | 1.68E-58 | Microglia |
| Rptor | Rptor | 1.22E-62 | 1.248120015 | 0.645 | 0.559 | 2.77E-58 | Microglia |
| Scoc | Scoc | 8.05E-62 | 1.369827368 | 0.381 | 0.17 | 1.83E-57 | Microglia |
| Mknk1 | Mknk1 | 1.73E-61 | 1.262685458 | 0.321 | 0.125 | 3.92E-57 | Microglia |
| Cerk1 | Cerk | 2.03E-61 | 1.303899993 | 0.387 | 0.174 | 4.61E-57 | Microglia |
| Gns | Gns | 1.22E-60 | 1.483934942 | 0.441 | 0.237 | 2.76E-56 | Microglia |
| Gm26542 | Gm26542 | 1.24E-60 | 1.574732999 | 0.433 | 0.229 | 2.82E-56 | Microglia |
| Dock101 | Dock10 | 1.49E-60 | 0.508985323 | 0.842 | 0.716 | 3.38E-56 | Microglia |
| Kcnk131 | Kcnk13 | 4.29E-60 | 1.179559404 | 0.37 | 0.152 | 9.75E-56 | Microglia |
| Snx18 | Snx18 | 6.67E-60 | 1.140631878 | 0.289 | 0.104 | 1.52E-55 | Microglia |
| Pan3 | Pan3 | 4.85E-59 | 1.184187764 | 0.706 | 0.705 | 1.10E-54 | Microglia |
| Hps3 | Hps3 | 1.56E-58 | 1.201890327 | 0.291 | 0.107 | 3.55E-54 | Microglia |
| Elf11 | Elf1 | 4.53E-58 | 1.08814601 | 0.333 | 0.131 | 1.03E-53 | Microglia |
| Rnf216 | Rnf216 | 6.74E-58 | 1.288636914 | 0.627 | 0.529 | 1.53E-53 | Microglia |
| Phactr2 | Phactr2 | 2.58E-57 | 1.178403456 | 0.294 | 0.106 | 5.86E-53 | Microglia |
| Tbc1d51 | Tbc1d5 | 3.73E-57 | 0.945010675 | 0.761 | 0.764 | 8.48E-53 | Microglia |
| Bin11 | Bin1 | 8.00E-57 | 1.087061534 | 0.624 | 0.438 | 1.82E-52 | Microglia |
| Git2 | Git2 | 6.76E-56 | 1.468549096 | 0.506 | 0.326 | 1.54E-51 | Microglia |
| Pmepa1 | Pmepa1 | 1.21E-55 | 1.510416238 | 0.518 | 0.352 | 2.75E-51 | Microglia |
| Chd72 | Chd7 | 3.45E-55 | 1.110007732 | 0.485 | 0.259 | 7.83E-51 | Microglia |
| Osbpl11 | Osbpl11 | 1.85E-52 | 1.41631949 | 0.401 | 0.212 | 4.20E-48 | Microglia |
| Ptbp3 | Ptbp3 | 1.20E-51 | 1.320089485 | 0.412 | 0.221 | 2.73E-47 | Microglia |
| Tmsb4x2 | Tmsb4x | 1.46E-51 | 1.128139377 | 0.671 | 0.583 | 3.32E-47 | Microglia |
| Man1c1 | Man1c1 | 4.20E-51 | 1.37838558 | 0.371 | 0.187 | 9.53E-47 | Microglia |
| Dst1 | Dst | 6.85E-50 | 0.91456516 | 0.771 | 0.835 | 1.56E-45 | Microglia |
| Rab8b | Rab8b | 1.58E-49 | 1.299067655 | 0.404 | 0.219 | 3.59E-45 | Microglia |
| Cables11 | Cables1 | 2.58E-49 | 1.149966312 | 0.348 | 0.157 | 5.86E-45 | Microglia |
| Gm32036 | Gm32036 | 1.07E-48 | 1.242104695 | 0.324 | 0.146 | 2.42E-44 | Microglia |
| Scamp2 | Scamp2 | 1.56E-48 | 1.188323374 | 0.272 | 0.106 | 3.55E-44 | Microglia |
| Znrf2 | Znrf2 | 1.96E-47 | 1.174185142 | 0.284 | 0.118 | 4.46E-43 | Microglia |
| Asph | Asph | 5.44E-47 | 1.436688621 | 0.513 | 0.382 | 1.24E-42 | Microglia |
| Mitf1 | Mitf | 1.12E-46 | 1.325918664 | 0.506 | 0.34 | 2.55E-42 | Microglia |
| Snx24 | Snx24 | 4.06E-46 | 1.488427412 | 0.509 | 0.373 | 9.23E-42 | Microglia |
| Tbc1d22a | Tbc1d22a | 1.43E-45 | 1.370526618 | 0.436 | 0.272 | 3.26E-41 | Microglia |
| Slc24a3 | Slc24a3 | 1.14E-44 | 1.152343907 | 0.605 | 0.475 | 2.60E-40 | Microglia |
| Lrp1 | Lrp1 | 2.27E-44 | 1.357246626 | 0.509 | 0.379 | 5.15E-40 | Microglia |
| Rcbtb2 | Rcbtb2 | 5.74E-44 | 1.186470098 | 0.303 | 0.136 | 1.30E-39 | Microglia |
| Dgkd | Dgkd | 1.24E-43 | 1.357741033 | 0.506 | 0.372 | 2.82E-39 | Microglia |
| Arhgap391 | Arhgap39 | 1.68E-43 | 1.291129558 | 0.586 | 0.493 | 3.81E-39 | Microglia |
| Gnaq1 | Gnaq | 2.88E-43 | 0.852416304 | 0.731 | 0.795 | 6.54E-39 | Microglia |
| Ppcdc | Ppcdc | 3.69E-43 | 1.322257373 | 0.378 | 0.209 | 8.37E-39 | Microglia |
| Tmem135 | Tmem135 | 4.81E-43 | 1.249269276 | 0.599 | 0.56 | 1.09E-38 | Microglia |
| Parp8 | Parp8 | 1.65E-42 | 1.326182081 | 0.493 | 0.351 | 3.76E-38 | Microglia |
| Fgf131 | Fgf13 | 2.15E-42 | 1.465223785 | 0.592 | 0.473 | 4.88E-38 | Microglia |
| Extl31 | Extl3 | 7.58E-42 | 1.312156097 | 0.441 | 0.28 | 1.72E-37 | Microglia |
| Klf3 | Klf3 | 1.90E-41 | 1.010212552 | 0.258 | 0.104 | 4.30E-37 | Microglia |
| Rtn4rl1 | Rtn4rl1 | 2.35E-41 | 1.321699938 | 0.362 | 0.201 | 5.34E-37 | Microglia |
| Rnf1801 | Rnf180 | 2.47E-41 | 1.349142197 | 0.517 | 0.399 | 5.61E-37 | Microglia |
| Rbm39 | Rbm39 | 4.05E-41 | 0.625927736 | 0.828 | 0.913 | 9.21E-37 | Microglia |
| Wipf11 | Wipf1 | 1.67E-40 | 0.850451371 | 0.376 | 0.182 | 3.78E-36 | Microglia |
| Tacc1 | Tacc1 | 3.54E-40 | 1.167638917 | 0.618 | 0.595 | 8.03E-36 | Microglia |
| Mtus11 | Mtus1 | 3.92E-40 | 1.173019072 | 0.373 | 0.202 | 8.91E-36 | Microglia |
| Btbd9 | Btbd9 | 1.28E-39 | 1.004332607 | 0.668 | 0.683 | 2.91E-35 | Microglia |
| Plek | Plek | 1.51E-39 | 1.215412767 | 0.308 | 0.151 | 3.42E-35 | Microglia |
| Tm6sf1 | Tm6sf1 | 3.52E-39 | 1.082305883 | 0.256 | 0.109 | 8.00E-35 | Microglia |
| Ccdc93 | Ccdc93 | 3.54E-39 | 1.129393945 | 0.291 | 0.137 | 8.04E-35 | Microglia |
| Marcks1 | Marcks | 3.12E-38 | 1.303810659 | 0.408 | 0.255 | 7.09E-34 | Microglia |
| Abcd2 | Abcd2 | 3.59E-37 | 1.089516907 | 0.272 | 0.123 | 8.15E-33 | Microglia |
| Pard3b1 | Pard3b | 7.65E-37 | 0.930092511 | 0.412 | 0.228 | 1.74E-32 | Microglia |
| Ski | Ski | 1.66E-36 | 1.307295853 | 0.521 | 0.441 | 3.76E-32 | Microglia |
| Myh9 | Myh9 | 4.38E-36 | 1.177724894 | 0.341 | 0.19 | 9.95E-32 | Microglia |
| Specc11 | Specc1 | 8.90E-36 | 1.061886913 | 0.619 | 0.613 | 2.02E-31 | Microglia |
| Plxna41 | Plxna4 | 1.08E-35 | 1.031918686 | 0.621 | 0.57 | 2.46E-31 | Microglia |
| Sdk11 | Sdk1 | 1.08E-35 | 1.157776112 | 0.387 | 0.223 | 2.46E-31 | Microglia |
| Gna121 | Gna12 | 1.17E-34 | 1.005589591 | 0.398 | 0.234 | 2.66E-30 | Microglia |
| Nrp1 | Nrp1 | 2.30E-34 | 1.254290922 | 0.359 | 0.211 | 5.23E-30 | Microglia |
| Rsrp11 | Rsrp1 | 5.80E-34 | 1.039764318 | 0.624 | 0.635 | 1.32E-29 | Microglia |
| Large11 | Large1 | 7.28E-34 | 0.700326156 | 0.777 | 0.803 | 1.65E-29 | Microglia |
| Gdi2 | Gdi2 | 1.15E-33 | 1.315345219 | 0.46 | 0.342 | 2.62E-29 | Microglia |
| Wdfy21 | Wdfy2 | 1.53E-33 | 1.099039729 | 0.378 | 0.227 | 3.48E-29 | Microglia |
| Zmiz11 | Zmiz1 | 1.64E-33 | 1.013677545 | 0.431 | 0.281 | 3.73E-29 | Microglia |
| Rab311 | Rab31 | 4.50E-33 | 0.83304626 | 0.433 | 0.252 | 1.02E-28 | Microglia |
| Elk3 | Elk3 | 8.56E-33 | 1.149476405 | 0.289 | 0.149 | 1.94E-28 | Microglia |
| Mtdh | Mtdh | 9.43E-33 | 1.069301521 | 0.622 | 0.64 | 2.14E-28 | Microglia |
| Rock2 | Rock2 | 2.13E-32 | 0.945541902 | 0.638 | 0.67 | 4.83E-28 | Microglia |
| Pwwp2a | Pwwp2a | 2.28E-32 | 1.267470856 | 0.474 | 0.372 | 5.18E-28 | Microglia |
| Frmd4a1 | Frmd4a | 3.92E-32 | 0.294204793 | 0.889 | 0.817 | 8.90E-28 | Microglia |
| Fcho21 | Fcho2 | 6.35E-32 | 1.145270233 | 0.559 | 0.511 | 1.44E-27 | Microglia |
| Tubgcp5 | Tubgcp5 | 8.98E-32 | 1.273358665 | 0.39 | 0.258 | 2.04E-27 | Microglia |
| Kansl11 | Kansl1 | 4.99E-31 | 0.670526048 | 0.754 | 0.853 | 1.13E-26 | Microglia |
| Kif21b | Kif21b | 1.15E-30 | 1.011580641 | 0.273 | 0.137 | 2.61E-26 | Microglia |
| Arsb | Arsb | 1.25E-30 | 1.483239855 | 0.506 | 0.445 | 2.83E-26 | Microglia |
| Tpm3 | Tpm3 | 2.11E-30 | 1.239625249 | 0.441 | 0.332 | 4.79E-26 | Microglia |
| Tcf7l21 | Tcf7l2 | 2.15E-30 | 0.680178471 | 0.324 | 0.162 | 4.89E-26 | Microglia |
| Ulk2 | Ulk2 | 2.96E-30 | 1.126079578 | 0.578 | 0.574 | 6.71E-26 | Microglia |
| Arhgap121 | Arhgap12 | 3.52E-30 | 1.108262541 | 0.471 | 0.373 | 7.99E-26 | Microglia |
| Hivep31 | Hivep3 | 1.16E-29 | 0.995251756 | 0.624 | 0.635 | 2.64E-25 | Microglia |
| E2f31 | E2f3 | 2.27E-29 | 1.197971664 | 0.381 | 0.255 | 5.16E-25 | Microglia |
| Fhit | Fhit | 3.35E-29 | 1.304893716 | 0.585 | 0.567 | 7.60E-25 | Microglia |
| Ubb2 | Ubb | 1.11E-28 | 0.92200153 | 0.618 | 0.613 | 2.53E-24 | Microglia |
| Ddx51 | Ddx5 | 1.13E-28 | 0.831950194 | 0.69 | 0.79 | 2.57E-24 | Microglia |
| Rffl1 | Rffl | 2.28E-28 | 0.931616971 | 0.408 | 0.262 | 5.17E-24 | Microglia |
| Tbc1d16 | Tbc1d16 | 2.63E-28 | 1.18312596 | 0.368 | 0.245 | 5.97E-24 | Microglia |
| Pik3r12 | Pik3r1 | 3.40E-28 | 1.02080642 | 0.528 | 0.442 | 7.73E-24 | Microglia |
| Tbc1d9 | Tbc1d9 | 1.01E-27 | 1.120764635 | 0.292 | 0.166 | 2.29E-23 | Microglia |
| Map4k42 | Map4k4 | 1.39E-27 | 0.944735617 | 0.585 | 0.543 | 3.16E-23 | Microglia |
| Rap1a1 | Rap1a | 3.01E-27 | 1.013414278 | 0.48 | 0.379 | 6.83E-23 | Microglia |
| Pitpnc11 | Pitpnc1 | 3.96E-27 | 0.66338615 | 0.643 | 0.616 | 8.99E-23 | Microglia |
| Actb2 | Actb | 9.96E-27 | 0.88369703 | 0.621 | 0.635 | 2.26E-22 | Microglia |
| Snx5 | Snx5 | 1.14E-26 | 1.184447194 | 0.311 | 0.188 | 2.59E-22 | Microglia |
| Fam134b1 | Fam134b | 2.32E-26 | 1.128614341 | 0.48 | 0.398 | 5.26E-22 | Microglia |
| Calm22 | Calm2 | 2.66E-26 | 0.824671978 | 0.706 | 0.813 | 6.04E-22 | Microglia |
| Aim2 | Aim2 | 5.70E-26 | 1.088435147 | 0.316 | 0.192 | 1.29E-21 | Microglia |
| Zfand31 | Zfand3 | 7.93E-26 | 0.980083447 | 0.603 | 0.645 | 1.80E-21 | Microglia |
| Ncoa3 | Ncoa3 | 8.82E-26 | 1.144557503 | 0.414 | 0.31 | 2.00E-21 | Microglia |
| Snx13 | Snx13 | 1.55E-25 | 1.181404373 | 0.46 | 0.382 | 3.51E-21 | Microglia |
| Wsb11 | Wsb1 | 1.92E-25 | 1.158813032 | 0.414 | 0.311 | 4.36E-21 | Microglia |
| Capza2 | Capza2 | 3.11E-25 | 1.149836148 | 0.408 | 0.304 | 7.07E-21 | Microglia |
| Man2b1 | Man2b1 | 1.16E-24 | 0.966539715 | 0.261 | 0.142 | 2.64E-20 | Microglia |
| Psap2 | Psap | 1.52E-24 | 0.987059397 | 0.581 | 0.582 | 3.45E-20 | Microglia |
| Cd9 | Cd9 | 1.81E-24 | 0.925144606 | 0.259 | 0.136 | 4.11E-20 | Microglia |
| Aftph | Aftph | 2.82E-24 | 1.090900663 | 0.529 | 0.519 | 6.40E-20 | Microglia |
| Tsc22d41 | Tsc22d4 | 3.95E-24 | 1.004580807 | 0.336 | 0.215 | 8.96E-20 | Microglia |
| Sft2d1 | Sft2d1 | 1.94E-23 | 1.004589451 | 0.325 | 0.207 | 4.40E-19 | Microglia |
| Cradd | Cradd | 2.90E-23 | 1.124928957 | 0.349 | 0.237 | 6.59E-19 | Microglia |
| Nfkb1 | Nfkb1 | 2.93E-23 | 1.173829644 | 0.46 | 0.396 | 6.65E-19 | Microglia |
| Rap1b | Rap1b | 5.00E-23 | 0.951399037 | 0.284 | 0.169 | 1.14E-18 | Microglia |
| Gnas1 | Gnas | 5.38E-23 | 0.943078304 | 0.566 | 0.532 | 1.22E-18 | Microglia |
| Daglb | Daglb | 6.40E-23 | 1.069454105 | 0.275 | 0.163 | 1.45E-18 | Microglia |
| Acsl4 | Acsl4 | 7.53E-23 | 1.011313351 | 0.292 | 0.18 | 1.71E-18 | Microglia |
| Adam17 | Adam17 | 1.40E-22 | 1.074940676 | 0.289 | 0.178 | 3.19E-18 | Microglia |
| Bbs9 | Bbs9 | 2.15E-22 | 1.137851099 | 0.529 | 0.517 | 4.89E-18 | Microglia |
| Grb2 | Grb2 | 2.79E-22 | 1.091793775 | 0.457 | 0.391 | 6.34E-18 | Microglia |
| Nipbl1 | Nipbl | 3.30E-22 | 0.774960336 | 0.635 | 0.722 | 7.48E-18 | Microglia |
| Smg1 | Smg1 | 3.61E-22 | 0.905409164 | 0.572 | 0.61 | 8.21E-18 | Microglia |
| Herc2 | Herc2 | 7.67E-22 | 1.012157511 | 0.537 | 0.547 | 1.74E-17 | Microglia |
| Cep68 | Cep68 | 1.58E-21 | 0.969656053 | 0.292 | 0.183 | 3.59E-17 | Microglia |
| Dock111 | Dock11 | 9.95E-21 | 1.119123814 | 0.376 | 0.281 | 2.26E-16 | Microglia |
| Map3k5 | Map3k5 | 1.17E-20 | 1.133620991 | 0.39 | 0.307 | 2.67E-16 | Microglia |
| Pacsin2 | Pacsin2 | 3.01E-20 | 1.062624114 | 0.262 | 0.157 | 6.84E-16 | Microglia |
| Ptp4a2 | Ptp4a2 | 3.14E-20 | 1.094852445 | 0.431 | 0.365 | 7.12E-16 | Microglia |
| Itm2b2 | Itm2b | 3.44E-20 | 0.980918268 | 0.526 | 0.5 | 7.81E-16 | Microglia |
| Bach21 | Bach2 | 4.98E-20 | 0.871674402 | 0.55 | 0.506 | 1.13E-15 | Microglia |
| Cltc | Cltc | 5.70E-20 | 0.967909198 | 0.526 | 0.524 | 1.29E-15 | Microglia |
| Capzb | Capzb | 6.21E-20 | 0.996524859 | 0.378 | 0.29 | 1.41E-15 | Microglia |
| Lpp1 | Lpp | 2.10E-19 | 0.913739374 | 0.45 | 0.373 | 4.77E-15 | Microglia |
| Agps1 | Agps | 3.67E-19 | 1.076927417 | 0.425 | 0.359 | 8.35E-15 | Microglia |
| Pcp42 | Pcp4 | 6.11E-19 | 0.908817306 | 0.572 | 0.594 | 1.39E-14 | Microglia |
| Phf14 | Phf14 | 6.60E-19 | 0.791445432 | 0.629 | 0.731 | 1.50E-14 | Microglia |
| Sh3kbp1 | Sh3kbp1 | 7.90E-19 | 0.793203279 | 0.602 | 0.655 | 1.80E-14 | Microglia |
| Actr2 | Actr2 | 1.79E-18 | 1.025483443 | 0.48 | 0.456 | 4.06E-14 | Microglia |
| Dnm2 | Dnm2 | 2.46E-18 | 0.976601941 | 0.483 | 0.464 | 5.58E-14 | Microglia |
| Dcakd | Dcakd | 7.55E-18 | 1.028466165 | 0.286 | 0.193 | 1.71E-13 | Microglia |
| Itgav | Itgav | 1.31E-17 | 0.99159867 | 0.412 | 0.346 | 2.97E-13 | Microglia |
| Stx7 | Stx7 | 1.53E-17 | 0.917276217 | 0.313 | 0.218 | 3.47E-13 | Microglia |
| Ptprm | Ptprm | 2.31E-17 | 0.717871573 | 0.54 | 0.477 | 5.25E-13 | Microglia |
| Clint1 | Clint1 | 4.82E-17 | 1.181956019 | 0.434 | 0.398 | 1.10E-12 | Microglia |
| Mgat51 | Mgat5 | 7.57E-17 | 0.909938052 | 0.507 | 0.497 | 1.72E-12 | Microglia |
| Kdm2b | Kdm2b | 7.91E-17 | 1.097222386 | 0.36 | 0.287 | 1.80E-12 | Microglia |
| Cux1 | Cux1 | 8.56E-17 | 0.824192807 | 0.592 | 0.677 | 1.94E-12 | Microglia |
| Fkbp5 | Fkbp5 | 3.28E-16 | 1.22104815 | 0.332 | 0.254 | 7.45E-12 | Microglia |
| Prpsap2 | Prpsap2 | 4.74E-16 | 0.986301199 | 0.28 | 0.19 | 1.08E-11 | Microglia |
| Adam101 | Adam10 | 4.83E-16 | 1.000581778 | 0.438 | 0.394 | 1.10E-11 | Microglia |
| Skil | Skil | 7.67E-16 | 1.042785702 | 0.272 | 0.185 | 1.74E-11 | Microglia |
| Morc3 | Morc3 | 1.36E-15 | 0.938234293 | 0.283 | 0.197 | 3.09E-11 | Microglia |
| Lmo2 | Lmo2 | 2.07E-15 | 0.915739609 | 0.262 | 0.174 | 4.69E-11 | Microglia |
| Ctsb1 | Ctsb | 5.42E-15 | 1.029348487 | 0.355 | 0.287 | 1.23E-10 | Microglia |
| Man1a2 | Man1a2 | 5.88E-15 | 0.866443548 | 0.55 | 0.624 | 1.34E-10 | Microglia |
| Prkca | Prkca | 9.91E-15 | 0.734900059 | 0.608 | 0.678 | 2.25E-10 | Microglia |
| Fam172a1 | Fam172a | 1.05E-14 | 0.739420398 | 0.64 | 0.771 | 2.38E-10 | Microglia |
| Jak1 | Jak1 | 2.40E-14 | 0.982576003 | 0.359 | 0.295 | 5.45E-10 | Microglia |
| Arid1a1 | Arid1a | 7.01E-14 | 0.94397799 | 0.501 | 0.53 | 1.59E-09 | Microglia |
| Mycbp2 | Mycbp2 | 8.06E-14 | 0.448780313 | 0.773 | 0.887 | 1.83E-09 | Microglia |
| Wdr44 | Wdr44 | 9.44E-14 | 0.990435802 | 0.335 | 0.271 | 2.14E-09 | Microglia |
| Pkn1 | Pkn1 | 1.13E-13 | 0.946961544 | 0.294 | 0.22 | 2.58E-09 | Microglia |
| Sfmbt1 | Sfmbt1 | 1.32E-13 | 0.975951603 | 0.384 | 0.335 | 3.00E-09 | Microglia |
| Rasa31 | Rasa3 | 1.81E-13 | 0.770157438 | 0.283 | 0.195 | 4.12E-09 | Microglia |
| Tab21 | Tab2 | 1.87E-13 | 0.968723875 | 0.439 | 0.427 | 4.26E-09 | Microglia |
| Iffo1 | Iffo1 | 1.91E-13 | 0.875733346 | 0.28 | 0.2 | 4.33E-09 | Microglia |
| Map3k3 | Map3k3 | 1.99E-13 | 0.934806258 | 0.487 | 0.514 | 4.51E-09 | Microglia |
| Nf11 | Nf1 | 3.94E-13 | 0.638039404 | 0.64 | 0.773 | 8.96E-09 | Microglia |
| Eml4 | Eml4 | 5.25E-13 | 0.996818717 | 0.458 | 0.475 | 1.19E-08 | Microglia |
| Srrm2 | Srrm2 | 8.43E-13 | 0.549470597 | 0.618 | 0.738 | 1.91E-08 | Microglia |
| Gna131 | Gna13 | 1.34E-12 | 0.789884166 | 0.25 | 0.169 | 3.03E-08 | Microglia |
| Magi12 | Magi1 | 2.21E-12 | 0.713114015 | 0.611 | 0.718 | 5.01E-08 | Microglia |
| Atp6v0b | Atp6v0b | 3.53E-12 | 0.890392653 | 0.498 | 0.551 | 8.03E-08 | Microglia |
| Pid11 | Pid1 | 6.43E-12 | 0.933906657 | 0.477 | 0.474 | 1.46E-07 | Microglia |
| Mapk14 | Mapk14 | 7.41E-12 | 1.076538465 | 0.428 | 0.436 | 1.68E-07 | Microglia |
| Eef2k | Eef2k | 1.18E-11 | 0.902474412 | 0.286 | 0.216 | 2.69E-07 | Microglia |
| Rbm26 | Rbm26 | 2.83E-11 | 0.589614552 | 0.619 | 0.755 | 6.43E-07 | Microglia |
| St6gal12 | St6gal1 | 4.25E-11 | 0.599877833 | 0.321 | 0.229 | 9.66E-07 | Microglia |
| Comt | Comt | 5.43E-11 | 0.918324025 | 0.444 | 0.459 | 1.23E-06 | Microglia |
| St3gal5 | St3gal5 | 6.67E-11 | 1.006819547 | 0.39 | 0.38 | 1.52E-06 | Microglia |
| Syngr1 | Syngr1 | 7.09E-11 | 0.863147601 | 0.259 | 0.194 | 1.61E-06 | Microglia |
| Irf2 | Irf2 | 1.48E-10 | 0.91728262 | 0.385 | 0.36 | 3.36E-06 | Microglia |
| Rtn41 | Rtn4 | 2.48E-10 | 0.353528116 | 0.67 | 0.79 | 5.64E-06 | Microglia |
| Acap21 | Acap2 | 2.82E-10 | 0.580362078 | 0.599 | 0.725 | 6.41E-06 | Microglia |
| Smad3 | Smad3 | 3.45E-10 | 1.101333573 | 0.335 | 0.294 | 7.84E-06 | Microglia |
| Cdc42 | Cdc42 | 3.51E-10 | 0.910487125 | 0.461 | 0.504 | 7.98E-06 | Microglia |
| Luc7l21 | Luc7l2 | 3.88E-10 | 0.276870237 | 0.791 | 0.929 | 8.82E-06 | Microglia |
| Ckb2 | Ckb | 5.86E-10 | 0.722861363 | 0.586 | 0.699 | 1.33E-05 | Microglia |
| Fam91a1 | Fam91a1 | 6.70E-10 | 0.922970316 | 0.258 | 0.196 | 1.52E-05 | Microglia |
| Gm20388 | Gm20388 | 6.95E-10 | 0.312562228 | 0.815 | 0.914 | 1.58E-05 | Microglia |
| Map3k7 | Map3k7 | 8.81E-10 | 0.251246914 | 0.179 | 0.34 | 2.00E-05 | Microglia |
| Smad71 | Smad7 | 9.41E-10 | 0.666299134 | 0.292 | 0.22 | 2.14E-05 | Microglia |
| Uvrag | Uvrag | 1.06E-09 | 0.886568443 | 0.464 | 0.513 | 2.42E-05 | Microglia |
| Rtn1 | Rtn1 | 1.14E-09 | 0.437977719 | 0.724 | 0.855 | 2.60E-05 | Microglia |
| Cbl | Cbl | 1.77E-09 | 0.931045822 | 0.412 | 0.414 | 4.03E-05 | Microglia |
| Sppl3 | Sppl3 | 1.87E-09 | 0.849952139 | 0.46 | 0.497 | 4.25E-05 | Microglia |
| Eef1a12 | Eef1a1 | 2.95E-09 | 0.770310905 | 0.496 | 0.535 | 6.69E-05 | Microglia |
| Abl11 | Abl1 | 2.95E-09 | 0.811857584 | 0.403 | 0.39 | 6.71E-05 | Microglia |
| Abi11 | Abi1 | 3.02E-09 | 0.752785429 | 0.512 | 0.594 | 6.87E-05 | Microglia |
| Lrrc4 | Lrrc4 | 3.35E-09 | 0.270740309 | 0.216 | 0.403 | 7.61E-05 | Microglia |
| Madd1 | Madd | 3.54E-09 | 0.316246145 | 0.179 | 0.337 | 8.04E-05 | Microglia |
| Klf121 | Klf12 | 3.95E-09 | 0.53527151 | 0.622 | 0.714 | 8.97E-05 | Microglia |
| Clstn1 | Clstn1 | 4.19E-09 | 0.265134534 | 0.278 | 0.502 | 9.51E-05 | Microglia |
| Wdr261 | Wdr26 | 4.65E-09 | 0.884382769 | 0.444 | 0.475 | 0.000105719 | Microglia |
| Pik3cb | Pik3cb | 4.86E-09 | 0.893170686 | 0.254 | 0.199 | 0.000110487 | Microglia |
| Trim33 | Trim33 | 4.89E-09 | 0.266251616 | 0.289 | 0.514 | 0.000111087 | Microglia |
| AC149090.11 | AC149090.1 | 7.54E-09 | 0.785306845 | 0.401 | 0.39 | 0.000171311 | Microglia |
| Sh3pxd2a1 | Sh3pxd2a | 7.65E-09 | 0.922491515 | 0.333 | 0.305 | 0.000173817 | Microglia |
| Gtdc11 | Gtdc1 | 7.84E-09 | 0.890486004 | 0.476 | 0.524 | 0.000177991 | Microglia |
| Erp29 | Erp29 | 1.10E-08 | 0.841217629 | 0.254 | 0.199 | 0.000249347 | Microglia |
| Cnot6l | Cnot6l | 1.48E-08 | 0.269056335 | 0.253 | 0.451 | 0.000335817 | Microglia |
| Tnpo3 | Tnpo3 | 1.81E-08 | 0.265370007 | 0.261 | 0.462 | 0.000411185 | Microglia |
| Lmbrd1 | Lmbrd1 | 1.87E-08 | 0.270857222 | 0.25 | 0.437 | 0.000424216 | Microglia |
| Ywhah1 | Ywhah | 2.83E-08 | 0.782181634 | 0.311 | 0.267 | 0.000641876 | Microglia |
| mt-Co1 | mt-Co1 | 3.02E-08 | 0.377140239 | 0.629 | 0.707 | 0.000685327 | Microglia |
| Clta | Clta | 3.05E-08 | 0.914740064 | 0.325 | 0.295 | 0.000692123 | Microglia |
| Son1 | Son | 4.00E-08 | 0.621901904 | 0.585 | 0.742 | 0.000909367 | Microglia |
| Khdrbs11 | Khdrbs1 | 4.18E-08 | 0.821242637 | 0.393 | 0.388 | 0.000949423 | Microglia |
| Fbxl171 | Fbxl17 | 4.32E-08 | 0.459679132 | 0.695 | 0.821 | 0.000981051 | Microglia |
| Sh3glb1 | Sh3glb1 | 5.60E-08 | 0.796636094 | 0.327 | 0.294 | 0.001271961 | Microglia |
| Calm12 | Calm1 | 6.24E-08 | 0.744298043 | 0.532 | 0.631 | 0.001416259 | Microglia |
| Washc4 | Washc4 | 6.25E-08 | 0.804686168 | 0.284 | 0.24 | 0.00141863 | Microglia |
| Ankrd11 | Ankrd11 | 6.44E-08 | 0.519688743 | 0.599 | 0.752 | 0.001462395 | Microglia |
| Kdm3b | Kdm3b | 6.56E-08 | 0.891988447 | 0.398 | 0.411 | 0.001489911 | Microglia |
| Angel2 | Angel2 | 9.17E-08 | 0.292596573 | 0.199 | 0.354 | 0.002082921 | Microglia |
| Ppp4r2 | Ppp4r2 | 1.10E-07 | 0.252075898 | 0.218 | 0.383 | 0.002501198 | Microglia |
| Gm16599 | Gm16599 | 1.11E-07 | 0.266032274 | 0.243 | 0.427 | 0.002517297 | Microglia |
| Evl | Evl | 1.17E-07 | 0.822410888 | 0.453 | 0.51 | 0.002666574 | Microglia |
| Zranb11 | Zranb1 | 1.44E-07 | 0.250919599 | 0.273 | 0.474 | 0.003269732 | Microglia |
| Suco | Suco | 1.59E-07 | 0.252165684 | 0.169 | 0.305 | 0.003612544 | Microglia |
| Phf12 | Phf12 | 1.74E-07 | 0.263541258 | 0.243 | 0.422 | 0.003948562 | Microglia |
| Rhoa | Rhoa | 1.85E-07 | 0.807837033 | 0.291 | 0.251 | 0.004196451 | Microglia |
| Ash1l1 | Ash1l | 2.07E-07 | 0.522029318 | 0.602 | 0.774 | 0.004693445 | Microglia |
| Tbc1d14 | Tbc1d14 | 2.12E-07 | 0.903349748 | 0.273 | 0.231 | 0.004810176 | Microglia |
| Fkbp15 | Fkbp15 | 2.21E-07 | 0.857262227 | 0.281 | 0.241 | 0.005025709 | Microglia |
| Hnrnpa2b12 | Hnrnpa2b1 | 2.23E-07 | 0.652648755 | 0.517 | 0.602 | 0.005066555 | Microglia |
| Mkln11 | Mkln1 | 2.23E-07 | 0.682552376 | 0.523 | 0.633 | 0.0050739 | Microglia |
| Wdfy3 | Wdfy3 | 2.27E-07 | 0.671949926 | 0.547 | 0.683 | 0.005152031 | Microglia |
| Ptpra2 | Ptpra | 2.34E-07 | 0.781594477 | 0.488 | 0.567 | 0.005306493 | Microglia |
| Tmem1641 | Tmem164 | 2.50E-07 | 0.734201157 | 0.455 | 0.501 | 0.005684643 | Microglia |
| Drd1 | Drd1 | 2.63E-07 | 0.265755179 | 0.191 | 0.334 | 0.005968027 | Microglia |
| Vdac1 | Vdac1 | 2.67E-07 | 0.259793436 | 0.221 | 0.385 | 0.006070526 | Microglia |
| Spata5 | Spata5 | 2.84E-07 | 0.340873447 | 0.226 | 0.396 | 0.006459861 | Microglia |
| Ppt1 | Ppt1 | 3.00E-07 | 0.299474283 | 0.224 | 0.389 | 0.006806735 | Microglia |
| Lamp21 | Lamp2 | 3.37E-07 | 0.787227063 | 0.33 | 0.304 | 0.007650928 | Microglia |
| Canx | Canx | 3.85E-07 | 0.848295898 | 0.403 | 0.417 | 0.008745559 | Microglia |
| Tax1bp1 | Tax1bp1 | 3.85E-07 | 0.320081172 | 0.232 | 0.402 | 0.008755282 | Microglia |
| C2cd3 | C2cd3 | 4.01E-07 | 0.264203303 | 0.172 | 0.307 | 0.009100461 | Microglia |
| Pura1 | Pura | 4.12E-07 | 0.26800967 | 0.283 | 0.482 | 0.009355649 | Microglia |
| Nr1d2 | Nr1d2 | 4.51E-07 | 0.258216746 | 0.243 | 0.413 | 0.010249185 | Microglia |
| Rps6kb11 | Rps6kb1 | 4.90E-07 | 0.281023108 | 0.28 | 0.481 | 0.011119222 | Microglia |
| Tbl1xr11 | Tbl1xr1 | 5.50E-07 | 0.742004936 | 0.427 | 0.453 | 0.012483852 | Microglia |
| Srsf5 | Srsf5 | 5.77E-07 | 0.800379298 | 0.46 | 0.519 | 0.013104556 | Microglia |
| Dhx57 | Dhx57 | 5.93E-07 | 0.278147429 | 0.231 | 0.395 | 0.013466548 | Microglia |
| Tcerg1 | Tcerg1 | 6.01E-07 | 0.25923025 | 0.209 | 0.362 | 0.013645692 | Microglia |
| Tor1aip11 | Tor1aip1 | 6.11E-07 | 0.729828357 | 0.259 | 0.212 | 0.013869352 | Microglia |
| Pum21 | Pum2 | 6.28E-07 | 0.777606722 | 0.457 | 0.519 | 0.014259655 | Microglia |
| 2610020C07Rik | 2610020C07Rik | 6.35E-07 | 0.294396606 | 0.204 | 0.353 | 0.014425336 | Microglia |
| Dpy19l4 | Dpy19l4 | 6.63E-07 | 0.824084666 | 0.332 | 0.313 | 0.015061471 | Microglia |
| Commd10 | Commd10 | 6.73E-07 | 0.265723305 | 0.169 | 0.297 | 0.015283125 | Microglia |
| Ttc17 | Ttc17 | 7.22E-07 | 0.272623429 | 0.311 | 0.535 | 0.016399071 | Microglia |
| Ccdc502 | Ccdc50 | 8.31E-07 | 0.771649141 | 0.382 | 0.372 | 0.018871159 | Microglia |
| Tspan13 | Tspan13 | 8.85E-07 | 0.343119614 | 0.196 | 0.346 | 0.020090079 | Microglia |
| Tspan31 | Tspan3 | 9.17E-07 | 0.269288404 | 0.194 | 0.342 | 0.020837534 | Microglia |
| Sf3b3 | Sf3b3 | 1.07E-06 | 0.277294759 | 0.155 | 0.277 | 0.024192506 | Microglia |
| 9130011E15Rik | 9130011E15Rik | 1.10E-06 | 0.298606571 | 0.306 | 0.519 | 0.024950853 | Microglia |
| Rab3gap1 | Rab3gap1 | 1.11E-06 | 0.287370802 | 0.318 | 0.538 | 0.025210812 | Microglia |
| Txndc11 | Txndc11 | 1.12E-06 | 0.255933847 | 0.223 | 0.378 | 0.025477928 | Microglia |
| Stmn3 | Stmn3 | 1.21E-06 | 0.31468862 | 0.245 | 0.418 | 0.027463861 | Microglia |
| Brk1 | Brk1 | 1.28E-06 | 0.325524817 | 0.205 | 0.356 | 0.029013371 | Microglia |
| Cab39l | Cab39l | 1.34E-06 | 0.32376007 | 0.177 | 0.306 | 0.030361125 | Microglia |
| Nsd1 | Nsd1 | 1.48E-06 | 0.491888266 | 0.624 | 0.797 | 0.033602576 | Microglia |
| Sdha | Sdha | 1.63E-06 | 0.296220988 | 0.24 | 0.405 | 0.037089353 | Microglia |
| Sema4d1 | Sema4d | 1.72E-06 | 0.648710884 | 0.294 | 0.255 | 0.038969479 | Microglia |
| Atp1a3 | Atp1a3 | 1.73E-06 | 0.260354038 | 0.351 | 0.601 | 0.039321931 | Microglia |
| Mmd | Mmd | 1.73E-06 | 0.303229486 | 0.16 | 0.279 | 0.039404633 | Microglia |
| Arih2 | Arih2 | 1.77E-06 | 0.273920321 | 0.216 | 0.369 | 0.040188062 | Microglia |
| Apoe1 | Apoe | 1.78E-06 | 0.371059754 | 0.524 | 0.549 | 0.040394479 | Microglia |
| Dcaf81 | Dcaf8 | 1.78E-06 | 0.300498358 | 0.24 | 0.406 | 0.040499491 | Microglia |
| Spin1 | Spin1 | 1.79E-06 | 0.252058507 | 0.156 | 0.275 | 0.040760277 | Microglia |
| Gm26836 | Gm26836 | 1.92E-06 | 0.264257771 | 0.167 | 0.289 | 0.04356244 | Microglia |
| Caap1 | Caap1 | 1.94E-06 | 0.267304965 | 0.15 | 0.262 | 0.044069898 | Microglia |
| Mlxip | Mlxip | 2.14E-06 | 0.815355848 | 0.292 | 0.263 | 0.048527014 | Microglia |
| Safb2 | Safb2 | 2.19E-06 | 0.253151953 | 0.205 | 0.352 | 0.049660599 | Microglia |
| Smarca21 | Smarca2 | 2.50E-06 | 0.721093121 | 0.479 | 0.55 | 0.056873236 | Microglia |
| Col4a3bp | Col4a3bp | 2.71E-06 | 0.285048748 | 0.242 | 0.408 | 0.061620505 | Microglia |
| Rlf | Rlf | 2.76E-06 | 0.337487784 | 0.284 | 0.483 | 0.06260059 | Microglia |
| Setdb1 | Setdb1 | 2.80E-06 | 0.342849425 | 0.205 | 0.35 | 0.063492013 | Microglia |
| Iqsec21 | Iqsec2 | 3.17E-06 | 0.250062793 | 0.297 | 0.503 | 0.071995221 | Microglia |
| Ddx6 | Ddx6 | 3.26E-06 | 0.852131854 | 0.425 | 0.475 | 0.074000099 | Microglia |
| Dlc1 | Dlc1 | 3.33E-06 | 0.721556982 | 0.305 | 0.273 | 0.075734175 | Microglia |
| Hnrnpd | Hnrnpd | 3.61E-06 | 0.260441405 | 0.216 | 0.361 | 0.082099476 | Microglia |
| Cramp1l | Cramp1l | 3.69E-06 | 0.255973399 | 0.171 | 0.291 | 0.083740551 | Microglia |
| Chst1 | Chst1 | 3.72E-06 | 0.291092905 | 0.19 | 0.323 | 0.084454311 | Microglia |
| Copa | Copa | 3.85E-06 | 0.295652626 | 0.248 | 0.413 | 0.087511062 | Microglia |
| Rcor1 | Rcor1 | 4.21E-06 | 0.324372569 | 0.204 | 0.343 | 0.095673456 | Microglia |
| Dhx9 | Dhx9 | 4.54E-06 | 0.812186009 | 0.284 | 0.257 | 0.103087391 | Microglia |
| Btbd7 | Btbd7 | 4.60E-06 | 0.320843043 | 0.299 | 0.498 | 0.104421933 | Microglia |
| Chmp3 | Chmp3 | 4.82E-06 | 0.280133473 | 0.205 | 0.344 | 0.109496268 | Microglia |
| Lrp6 | Lrp6 | 4.99E-06 | 0.293559245 | 0.299 | 0.501 | 0.113355207 | Microglia |
| Rapgef1 | Rapgef1 | 5.27E-06 | 0.873847175 | 0.409 | 0.448 | 0.119617487 | Microglia |
| Ndel1 | Ndel1 | 5.30E-06 | 0.291766502 | 0.179 | 0.302 | 0.12048816 | Microglia |
| Kat6a | Kat6a | 5.48E-06 | 0.849308656 | 0.378 | 0.389 | 0.124389618 | Microglia |
| Usp24 | Usp24 | 5.49E-06 | 0.748187038 | 0.449 | 0.519 | 0.124584125 | Microglia |
| Psen1 | Psen1 | 5.65E-06 | 0.250345366 | 0.188 | 0.322 | 0.128385911 | Microglia |
| Wdfy1 | Wdfy1 | 5.75E-06 | 0.311627668 | 0.166 | 0.286 | 0.13068077 | Microglia |
| Qrich1 | Qrich1 | 5.97E-06 | 0.293867949 | 0.318 | 0.532 | 0.135575732 | Microglia |
| Atpif1 | Atpif1 | 6.19E-06 | 0.279388874 | 0.186 | 0.315 | 0.140656168 | Microglia |
| Usp8 | Usp8 | 6.40E-06 | 0.823823375 | 0.302 | 0.282 | 0.145426343 | Microglia |
| Dcaf5 | Dcaf5 | 6.56E-06 | 0.298495775 | 0.264 | 0.436 | 0.148973635 | Microglia |
| Ap2a2 | Ap2a2 | 6.79E-06 | 0.264520036 | 0.201 | 0.335 | 0.154110827 | Microglia |
| Tango2 | Tango2 | 6.86E-06 | 0.364297724 | 0.224 | 0.377 | 0.155802032 | Microglia |
| Nr6a1 | Nr6a1 | 6.87E-06 | 0.821054442 | 0.463 | 0.534 | 0.156112513 | Microglia |
| Atp2c1 | Atp2c1 | 6.99E-06 | 0.775226754 | 0.51 | 0.636 | 0.158737043 | Microglia |
| Myo1b1 | Myo1b | 7.02E-06 | 0.279757111 | 0.224 | 0.373 | 0.159459613 | Microglia |
| Uggt1 | Uggt1 | 7.44E-06 | 0.281285964 | 0.167 | 0.282 | 0.168962953 | Microglia |
| Rnf131 | Rnf13 | 7.53E-06 | 0.701403731 | 0.419 | 0.441 | 0.170968634 | Microglia |
| Orc3 | Orc3 | 7.82E-06 | 0.298737837 | 0.224 | 0.371 | 0.177586792 | Microglia |
| Snx10 | Snx10 | 7.92E-06 | 0.322439819 | 0.256 | 0.427 | 0.179822828 | Microglia |
| Dhx15 | Dhx15 | 8.01E-06 | 0.254294617 | 0.205 | 0.338 | 0.182016483 | Microglia |
| Rsf1 | Rsf1 | 8.95E-06 | 0.252281462 | 0.376 | 0.621 | 0.203194 | Microglia |
| Trip11 | Trip11 | 8.95E-06 | 0.300862235 | 0.292 | 0.481 | 0.203330225 | Microglia |
| Marf1 | Marf1 | 9.01E-06 | 0.324386198 | 0.212 | 0.351 | 0.20453475 | Microglia |
| Sec621 | Sec62 | 9.07E-06 | 0.276553175 | 0.221 | 0.366 | 0.205951594 | Microglia |
| Xrn21 | Xrn2 | 9.66E-06 | 0.31904146 | 0.231 | 0.38 | 0.219336548 | Microglia |
| Cd812 | Cd81 | 9.68E-06 | 0.679456145 | 0.341 | 0.328 | 0.219889716 | Microglia |
| Tmx3 | Tmx3 | 9.96E-06 | 0.278940978 | 0.196 | 0.326 | 0.226177148 | Microglia |
| Ssb | Ssb | 1.02E-05 | 0.286629592 | 0.185 | 0.308 | 0.2307004 | Microglia |
| Ube2l3 | Ube2l3 | 1.05E-05 | 0.27976706 | 0.167 | 0.283 | 0.239276661 | Microglia |
| C1qtnf4 | C1qtnf4 | 1.07E-05 | 0.358461951 | 0.248 | 0.407 | 0.242683538 | Microglia |
| Zzz31 | Zzz3 | 1.15E-05 | 0.2811561 | 0.253 | 0.41 | 0.260226999 | Microglia |
| Kdm5a1 | Kdm5a | 1.16E-05 | 0.329381415 | 0.294 | 0.48 | 0.263042795 | Microglia |
| Ppp4r3a | Ppp4r3a | 1.17E-05 | 0.311174035 | 0.21 | 0.347 | 0.266551971 | Microglia |
| Cnot1 | Cnot1 | 1.22E-05 | 0.348312529 | 0.294 | 0.489 | 0.277559529 | Microglia |
| Rac1 | Rac1 | 1.28E-05 | 0.725189293 | 0.281 | 0.256 | 0.291104268 | Microglia |
| Rab6b | Rab6b | 1.30E-05 | 0.318929001 | 0.31 | 0.515 | 0.294923186 | Microglia |
| St8sia3 | St8sia3 | 1.41E-05 | 0.308845536 | 0.224 | 0.367 | 0.321326969 | Microglia |
| Cisd2 | Cisd2 | 1.44E-05 | 0.280234119 | 0.161 | 0.27 | 0.326866777 | Microglia |
| Hmg20a | Hmg20a | 1.48E-05 | 0.261961886 | 0.318 | 0.528 | 0.337159529 | Microglia |
| Nr3c11 | Nr3c1 | 1.49E-05 | 0.748347934 | 0.409 | 0.436 | 0.337989576 | Microglia |
| Rab14 | Rab14 | 1.51E-05 | 0.785815727 | 0.409 | 0.454 | 0.341856664 | Microglia |
| Fus | Fus | 1.58E-05 | 0.56932114 | 0.57 | 0.736 | 0.359774418 | Microglia |
| Slc16a71 | Slc16a7 | 1.75E-05 | 0.351206391 | 0.259 | 0.422 | 0.397672577 | Microglia |
| 1810013L24Rik | 1810013L24Rik | 1.77E-05 | 0.271885275 | 0.182 | 0.303 | 0.401752599 | Microglia |
| Prr14l | Prr14l | 1.78E-05 | 0.261480737 | 0.158 | 0.266 | 0.403198651 | Microglia |
| Wdr45b | Wdr45b | 1.99E-05 | 0.318961569 | 0.148 | 0.252 | 0.450865649 | Microglia |
| Hp1bp3 | Hp1bp3 | 2.11E-05 | 0.259785826 | 0.209 | 0.338 | 0.478283953 | Microglia |
| Stat3 | Stat3 | 2.12E-05 | 0.692747958 | 0.253 | 0.22 | 0.482153972 | Microglia |
| Id41 | Id4 | 2.13E-05 | 0.278218138 | 0.183 | 0.3 | 0.482931711 | Microglia |
| Tmem87a | Tmem87a | 2.16E-05 | 0.259389083 | 0.204 | 0.33 | 0.490612297 | Microglia |
| Trak11 | Trak1 | 2.19E-05 | 0.309684556 | 0.24 | 0.395 | 0.496898567 | Microglia |
| St13 | St13 | 2.37E-05 | 0.35652356 | 0.234 | 0.387 | 0.538772091 | Microglia |
| Hspa4 | Hspa4 | 2.43E-05 | 0.290227196 | 0.224 | 0.361 | 0.551672414 | Microglia |
| Slx4ip | Slx4ip | 2.59E-05 | 0.343173002 | 0.174 | 0.287 | 0.589268511 | Microglia |
| Gpr882 | Gpr88 | 2.61E-05 | 0.72334705 | 0.48 | 0.571 | 0.593687229 | Microglia |
| Atp1a11 | Atp1a1 | 2.65E-05 | 0.338917868 | 0.199 | 0.328 | 0.601117417 | Microglia |
| Ktn1 | Ktn1 | 2.82E-05 | 0.296464654 | 0.341 | 0.566 | 0.640190856 | Microglia |
| Rhoq | Rhoq | 2.95E-05 | 0.773059138 | 0.295 | 0.28 | 0.670244272 | Microglia |
| Preb | Preb | 2.96E-05 | 0.26847762 | 0.166 | 0.275 | 0.67229369 | Microglia |
| Papd5 | Papd5 | 3.21E-05 | 0.417933441 | 0.248 | 0.401 | 0.730221747 | Microglia |
| Thoc2 | Thoc2 | 3.33E-05 | 0.28045754 | 0.351 | 0.585 | 0.756336461 | Microglia |
| Zfp91 | Zfp91 | 3.68E-05 | 0.303074668 | 0.193 | 0.313 | 0.834729367 | Microglia |
| Trmt1l | Trmt1l | 3.70E-05 | 0.264056175 | 0.194 | 0.314 | 0.841219342 | Microglia |
| Senp6 | Senp6 | 3.92E-05 | 0.275238029 | 0.362 | 0.594 | 0.89102964 | Microglia |
| Plekhm21 | Plekhm2 | 4.04E-05 | 0.359952036 | 0.202 | 0.326 | 0.917718019 | Microglia |
| Fbrsl11 | Fbrsl1 | 4.10E-05 | 0.795667788 | 0.321 | 0.315 | 0.930376953 | Microglia |
| Kpna3 | Kpna3 | 4.83E-05 | 0.323609932 | 0.272 | 0.439 | 1 | Microglia |
| Rhot1 | Rhot1 | 5.12E-05 | 0.280186523 | 0.226 | 0.361 | 1 | Microglia |
| Ptpa | Ptpa | 5.18E-05 | 0.350955788 | 0.226 | 0.366 | 1 | Microglia |
| Pten | Pten | 5.29E-05 | 0.717431978 | 0.513 | 0.657 | 1 | Microglia |
| Susd6 | Susd6 | 5.29E-05 | 0.830505499 | 0.341 | 0.346 | 1 | Microglia |
| Clcn3 | Clcn3 | 5.32E-05 | 0.299203089 | 0.318 | 0.514 | 1 | Microglia |
| Mob4 | Mob4 | 5.47E-05 | 0.261606623 | 0.175 | 0.28 | 1 | Microglia |
| Ddi2 | Ddi2 | 5.49E-05 | 0.848780562 | 0.311 | 0.309 | 1 | Microglia |
| Celf1 | Celf1 | 5.76E-05 | 0.40271725 | 0.619 | 0.773 | 1 | Microglia |
| Cep170 | Cep170 | 6.37E-05 | 0.760159336 | 0.422 | 0.484 | 1 | Microglia |
| N4bp1 | N4bp1 | 7.81E-05 | 0.35041189 | 0.163 | 0.269 | 1 | Microglia |
| Fbxw4 | Fbxw4 | 8.58E-05 | 0.375059851 | 0.254 | 0.409 | 1 | Microglia |
| Gm219921 | Gm21992 | 8.85E-05 | 0.25897176 | 0.31 | 0.498 | 1 | Microglia |
| Sv2a | Sv2a | 8.98E-05 | 0.312607385 | 0.262 | 0.419 | 1 | Microglia |
| Smurf1 | Smurf1 | 9.08E-05 | 0.389595211 | 0.267 | 0.431 | 1 | Microglia |
| Btaf1 | Btaf1 | 9.41E-05 | 0.402809828 | 0.314 | 0.513 | 1 | Microglia |
| Pxk1 | Pxk | 9.64E-05 | 0.262317778 | 0.188 | 0.297 | 1 | Microglia |
| Nup98 | Nup98 | 9.82E-05 | 0.312572651 | 0.305 | 0.488 | 1 | Microglia |
| Hnrnpm | Hnrnpm | 9.89E-05 | 0.342025407 | 0.302 | 0.484 | 1 | Microglia |
| 4933434E20Rik | 4933434E20Rik | 0.000100119 | 0.27489701 | 0.188 | 0.299 | 1 | Microglia |
| Gpr107 | Gpr107 | 0.000101923 | 0.315364277 | 0.197 | 0.318 | 1 | Microglia |
| Cop1 | Cop1 | 0.000102376 | 0.310084523 | 0.314 | 0.509 | 1 | Microglia |
| Ly6h | Ly6h | 0.000104698 | 0.326950892 | 0.254 | 0.408 | 1 | Microglia |
| Cd47 | Cd47 | 0.00010731 | 0.262622274 | 0.36 | 0.587 | 1 | Microglia |
| Sort11 | Sort1 | 0.00011049 | 0.272926911 | 0.308 | 0.484 | 1 | Microglia |
| Ppp6r3 | Ppp6r3 | 0.000111116 | 0.266124306 | 0.329 | 0.527 | 1 | Microglia |
| Ctdspl2 | Ctdspl2 | 0.000112104 | 0.257737881 | 0.248 | 0.388 | 1 | Microglia |
| Zfand62 | Zfand6 | 0.000112206 | 0.699294135 | 0.313 | 0.298 | 1 | Microglia |
| Nsmaf | Nsmaf | 0.000113454 | 0.317321536 | 0.201 | 0.321 | 1 | Microglia |
| Uso1 | Uso1 | 0.000115614 | 0.369800738 | 0.226 | 0.354 | 1 | Microglia |
| Wrn | Wrn | 0.000116134 | 0.293269932 | 0.172 | 0.277 | 1 | Microglia |
| Impact | Impact | 0.000124818 | 0.328260267 | 0.226 | 0.357 | 1 | Microglia |
| Dnajc7 | Dnajc7 | 0.000126536 | 0.357391446 | 0.318 | 0.514 | 1 | Microglia |
| Cdkal11 | Cdkal1 | 0.000136136 | 0.263106494 | 0.368 | 0.592 | 1 | Microglia |
| Cul3 | Cul3 | 0.000136735 | 0.375310648 | 0.292 | 0.47 | 1 | Microglia |
| Atp1b12 | Atp1b1 | 0.000137651 | 0.565885891 | 0.573 | 0.755 | 1 | Microglia |
| Nol4l | Nol4l | 0.00013846 | 0.376095779 | 0.186 | 0.298 | 1 | Microglia |
| Abhd6 | Abhd6 | 0.000141708 | 0.305406221 | 0.172 | 0.275 | 1 | Microglia |
| Arf3 | Arf3 | 0.000145775 | 0.38339463 | 0.322 | 0.523 | 1 | Microglia |
| 2510009E07Rik | 2510009E07Rik | 0.000146124 | 0.398007596 | 0.22 | 0.344 | 1 | Microglia |
| Asxl2 | Asxl2 | 0.00015039 | 0.29029928 | 0.389 | 0.633 | 1 | Microglia |
| Creb11 | Creb1 | 0.000151241 | 0.835434761 | 0.359 | 0.381 | 1 | Microglia |
| Eef1a2 | Eef1a2 | 0.000152656 | 0.274823006 | 0.156 | 0.25 | 1 | Microglia |
| Vta1 | Vta1 | 0.000155247 | 0.319663374 | 0.188 | 0.295 | 1 | Microglia |
| Rnf169 | Rnf169 | 0.00015573 | 0.69695875 | 0.479 | 0.603 | 1 | Microglia |
| Cnot2 | Cnot2 | 0.000159141 | 0.718549524 | 0.452 | 0.548 | 1 | Microglia |
| Rbm33 | Rbm33 | 0.00016198 | 0.354191458 | 0.28 | 0.448 | 1 | Microglia |
| Ptpn1 | Ptpn1 | 0.000167005 | 0.838766638 | 0.321 | 0.328 | 1 | Microglia |
| Exoc3 | Exoc3 | 0.00016912 | 0.299551696 | 0.201 | 0.313 | 1 | Microglia |
| Med12l1 | Med12l | 0.000180999 | 0.537436838 | 0.502 | 0.615 | 1 | Microglia |
| Mtss11 | Mtss1 | 0.000182287 | 0.593976054 | 0.295 | 0.271 | 1 | Microglia |
| Pank2 | Pank2 | 0.000185766 | 0.367524658 | 0.204 | 0.33 | 1 | Microglia |
| Sppl2a | Sppl2a | 0.00018899 | 0.392197897 | 0.253 | 0.403 | 1 | Microglia |
| Pbrm11 | Pbrm1 | 0.000199884 | 0.285759276 | 0.359 | 0.574 | 1 | Microglia |
| Mgea5 | Mgea5 | 0.000203851 | 0.351453867 | 0.324 | 0.521 | 1 | Microglia |
| Ap3b1 | Ap3b1 | 0.000208339 | 0.618223642 | 0.455 | 0.534 | 1 | Microglia |
| Snx3 | Snx3 | 0.000211846 | 0.388542271 | 0.227 | 0.363 | 1 | Microglia |
| C2cd2l | C2cd2l | 0.000213221 | 0.300386942 | 0.161 | 0.261 | 1 | Microglia |
| Ppp1r1b | Ppp1r1b | 0.000215698 | 0.338409127 | 0.246 | 0.383 | 1 | Microglia |
| Mdm4 | Mdm4 | 0.000229934 | 0.313962634 | 0.327 | 0.523 | 1 | Microglia |
| Dnajb14 | Dnajb14 | 0.000234365 | 0.298363088 | 0.18 | 0.285 | 1 | Microglia |
| Zfp207 | Zfp207 | 0.000250411 | 0.329331005 | 0.281 | 0.446 | 1 | Microglia |
| Fnip21 | Fnip2 | 0.000252409 | 0.730833256 | 0.311 | 0.308 | 1 | Microglia |
| Rbbp4 | Rbbp4 | 0.000264409 | 0.325359534 | 0.188 | 0.297 | 1 | Microglia |
| Tnrc6b1 | Tnrc6b | 0.000267869 | 0.37729313 | 0.627 | 0.823 | 1 | Microglia |
| Xiap1 | Xiap | 0.000268808 | 0.792798576 | 0.322 | 0.332 | 1 | Microglia |
| Acbd5 | Acbd5 | 0.000269561 | 0.321876128 | 0.22 | 0.343 | 1 | Microglia |
| Caly | Caly | 0.00028207 | 0.330396117 | 0.183 | 0.287 | 1 | Microglia |
| Yaf2 | Yaf2 | 0.000298695 | 0.367919204 | 0.197 | 0.309 | 1 | Microglia |
| Ppp1r12a | Ppp1r12a | 0.000298919 | 0.477919397 | 0.553 | 0.723 | 1 | Microglia |
| Tank | Tank | 0.000316266 | 0.27566354 | 0.202 | 0.314 | 1 | Microglia |
| Man1a1 | Man1a | 0.000345454 | 0.454386232 | 0.521 | 0.583 | 1 | Microglia |
| AW554918 | AW554918 | 0.000368887 | 0.322596129 | 0.329 | 0.519 | 1 | Microglia |
| Fam117b | Fam117b | 0.000376977 | 0.823965617 | 0.378 | 0.426 | 1 | Microglia |
| Rnpep | Rnpep | 0.000412792 | 0.820524891 | 0.284 | 0.277 | 1 | Microglia |
| Hnrnph1 | Hnrnph1 | 0.00043028 | 0.710814984 | 0.376 | 0.416 | 1 | Microglia |
| Emc101 | Emc10 | 0.000431571 | 0.250348396 | 0.167 | 0.26 | 1 | Microglia |
| Sf3b1 | Sf3b1 | 0.000436844 | 0.647996822 | 0.472 | 0.584 | 1 | Microglia |
| Snx11 | Snx1 | 0.00044911 | 0.264599103 | 0.19 | 0.295 | 1 | Microglia |
| Zwint | Zwint | 0.000449813 | 0.30037587 | 0.357 | 0.568 | 1 | Microglia |
| Eif4a2 | Eif4a2 | 0.000462752 | 0.767278021 | 0.349 | 0.373 | 1 | Microglia |
| Rcn2 | Rcn2 | 0.000466689 | 0.299272333 | 0.174 | 0.271 | 1 | Microglia |
| Rnf115 | Rnf115 | 0.000469691 | 0.306586185 | 0.172 | 0.268 | 1 | Microglia |
| Ccni | Ccni | 0.000483717 | 0.756165185 | 0.291 | 0.288 | 1 | Microglia |
| Kif5b1 | Kif5b | 0.000489359 | 0.314210855 | 0.336 | 0.526 | 1 | Microglia |
| Nudcd3 | Nudcd3 | 0.000513263 | 0.352197131 | 0.306 | 0.487 | 1 | Microglia |
| Setd3 | Setd3 | 0.000514859 | 0.349808576 | 0.265 | 0.41 | 1 | Microglia |
| Ubn1 | Ubn1 | 0.00053085 | 0.331160743 | 0.185 | 0.286 | 1 | Microglia |
| St3gal31 | St3gal3 | 0.000530873 | 0.355841685 | 0.297 | 0.459 | 1 | Microglia |
| Zfp277 | Zfp277 | 0.00053818 | 0.352977527 | 0.19 | 0.292 | 1 | Microglia |
| BC005537 | BC005537 | 0.000543153 | 0.394306085 | 0.232 | 0.362 | 1 | Microglia |
| Prpf39 | Prpf39 | 0.000565431 | 0.379413713 | 0.246 | 0.379 | 1 | Microglia |
| Fndc3a | Fndc3a | 0.000570318 | 0.402265253 | 0.313 | 0.497 | 1 | Microglia |
| Mef2d | Mef2d | 0.000572479 | 0.401434567 | 0.288 | 0.456 | 1 | Microglia |
| Dgkz1 | Dgkz | 0.000583591 | 0.368744726 | 0.239 | 0.364 | 1 | Microglia |
| Vgll41 | Vgll4 | 0.000598413 | 0.613661709 | 0.321 | 0.318 | 1 | Microglia |
| Zfp7401 | Zfp740 | 0.000630392 | 0.336683827 | 0.179 | 0.276 | 1 | Microglia |
| Sbf2 | Sbf2 | 0.000686553 | 0.397872171 | 0.596 | 0.77 | 1 | Microglia |
| Mier1 | Mier1 | 0.000691877 | 0.291423102 | 0.28 | 0.431 | 1 | Microglia |
| Arhgef21 | Arhgef2 | 0.000698642 | 0.288098577 | 0.246 | 0.379 | 1 | Microglia |
| Acin1 | Acin1 | 0.000728215 | 0.365902673 | 0.308 | 0.48 | 1 | Microglia |
| Lrch31 | Lrch3 | 0.000770405 | 0.287656018 | 0.344 | 0.534 | 1 | Microglia |
| Pak21 | Pak2 | 0.000779034 | 0.72403297 | 0.319 | 0.332 | 1 | Microglia |
| Brip1os | Brip1os | 0.000803612 | 0.340124376 | 0.193 | 0.292 | 1 | Microglia |
| Serbp1 | Serbp1 | 0.000804922 | 0.330902269 | 0.242 | 0.367 | 1 | Microglia |
| Cdk141 | Cdk14 | 0.000837293 | 0.432751682 | 0.417 | 0.433 | 1 | Microglia |
| Sumo2 | Sumo2 | 0.000846369 | 0.316318524 | 0.224 | 0.341 | 1 | Microglia |
| Nr2c2 | Nr2c2 | 0.00086696 | 0.32699128 | 0.349 | 0.554 | 1 | Microglia |
| Cask | Cask | 0.0008771 | 0.546093343 | 0.517 | 0.66 | 1 | Microglia |
| Kansl1l1 | Kansl1l | 0.00089253 | 0.345539783 | 0.373 | 0.592 | 1 | Microglia |
| Ascc3 | Ascc3 | 0.00098504 | 0.273954992 | 0.408 | 0.646 | 1 | Microglia |
| Lsm14a | Lsm14a | 0.000990441 | 0.312088548 | 0.177 | 0.27 | 1 | Microglia |
| Serpine2 | Serpine2 | 0.000991246 | 0.724254936 | 0.433 | 0.509 | 1 | Microglia |
| Rapgef2 | Rapgef2 | 0.001046898 | 0.255879374 | 0.389 | 0.605 | 1 | Microglia |
| Pcbp2 | Pcbp2 | 0.001076905 | 0.339624733 | 0.333 | 0.519 | 1 | Microglia |
| Dennd6a | Dennd6a | 0.001084158 | 0.411133176 | 0.318 | 0.5 | 1 | Microglia |
| Scamp1 | Scamp1 | 0.001108269 | 0.380947023 | 0.332 | 0.534 | 1 | Microglia |
| Hpca | Hpca | 0.00111547 | 0.352573664 | 0.239 | 0.365 | 1 | Microglia |
| Slc38a11 | Slc38a1 | 0.001154661 | 0.27843129 | 0.237 | 0.356 | 1 | Microglia |
| Eif4g12 | Eif4g1 | 0.001154779 | 0.386825205 | 0.251 | 0.389 | 1 | Microglia |
| Sfi1 | Sfi1 | 0.001174872 | 0.411133841 | 0.21 | 0.321 | 1 | Microglia |
| Scaf8 | Scaf8 | 0.001187648 | 0.287808289 | 0.373 | 0.582 | 1 | Microglia |
| Snrk1 | Snrk | 0.001188966 | 0.335246905 | 0.18 | 0.273 | 1 | Microglia |
| Mtmr3 | Mtmr3 | 0.001189712 | 0.643690325 | 0.471 | 0.59 | 1 | Microglia |
| 4732471J01Rik1 | 4732471J01Rik | 0.001221938 | 0.29479794 | 0.28 | 0.423 | 1 | Microglia |
| Slc23a2 | Slc23a2 | 0.001265506 | 0.458879457 | 0.258 | 0.399 | 1 | Microglia |
| Elavl1 | Elavl1 | 0.00127957 | 0.372458611 | 0.256 | 0.39 | 1 | Microglia |
| Maged11 | Maged1 | 0.001338227 | 0.325025866 | 0.169 | 0.259 | 1 | Microglia |
| Cul1 | Cul1 | 0.001352363 | 0.735973221 | 0.423 | 0.509 | 1 | Microglia |
| Ube2e31 | Ube2e3 | 0.001387058 | 0.279829515 | 0.193 | 0.29 | 1 | Microglia |
| Syp | Syp | 0.001423685 | 0.354854019 | 0.24 | 0.367 | 1 | Microglia |
| Ube2e11 | Ube2e1 | 0.001424867 | 0.337164208 | 0.164 | 0.25 | 1 | Microglia |
| Ywhag | Ywhag | 0.001436195 | 0.410637612 | 0.258 | 0.391 | 1 | Microglia |
| Rbm251 | Rbm25 | 0.001512982 | 0.483774628 | 0.559 | 0.746 | 1 | Microglia |
| Capza1 | Capza1 | 0.001522418 | 0.755772385 | 0.327 | 0.353 | 1 | Microglia |
| Gpr155 | Gpr155 | 0.001639458 | 0.402412597 | 0.248 | 0.38 | 1 | Microglia |
| Gm265611 | Gm26561 | 0.001645187 | 0.728688994 | 0.278 | 0.279 | 1 | Microglia |
| Casc3 | Casc3 | 0.00166056 | 0.362911822 | 0.204 | 0.309 | 1 | Microglia |
| AI5934421 | AI593442 | 0.001664776 | 0.338213648 | 0.188 | 0.281 | 1 | Microglia |
| Pi4kb | Pi4kb | 0.001687123 | 0.349229884 | 0.194 | 0.293 | 1 | Microglia |
| Hipk3 | Hipk3 | 0.001711132 | 0.33363584 | 0.202 | 0.304 | 1 | Microglia |
| Zfp326 | Zfp326 | 0.001731493 | 0.299751477 | 0.172 | 0.258 | 1 | Microglia |
| Zfand5 | Zfand5 | 0.001854092 | 0.349383107 | 0.227 | 0.338 | 1 | Microglia |
| Kras | Kras | 0.00185751 | 0.280911803 | 0.172 | 0.258 | 1 | Microglia |
| Dnajc13 | Dnajc13 | 0.001903525 | 0.414140307 | 0.278 | 0.425 | 1 | Microglia |
| Nt5dc1 | Nt5dc1 | 0.001917297 | 0.383330541 | 0.172 | 0.262 | 1 | Microglia |
| Gm10563 | Gm10563 | 0.002029394 | 0.318090505 | 0.188 | 0.282 | 1 | Microglia |
| Kmt5b1 | Kmt5b | 0.002042633 | 0.364854303 | 0.294 | 0.441 | 1 | Microglia |
| Tmed101 | Tmed10 | 0.002118504 | 0.333357825 | 0.205 | 0.309 | 1 | Microglia |
| Phf21a1 | Phf21a | 0.002142641 | 0.331198063 | 0.621 | 0.816 | 1 | Microglia |
| Gm37240 | Gm37240 | 0.002151838 | 0.385015224 | 0.327 | 0.499 | 1 | Microglia |
| Pvt11 | Pvt1 | 0.002231 | 0.789991962 | 0.341 | 0.37 | 1 | Microglia |
| Nisch | Nisch | 0.002284878 | 0.342095377 | 0.346 | 0.538 | 1 | Microglia |
| R3hdm2 | R3hdm2 | 0.002312879 | 0.25217248 | 0.398 | 0.624 | 1 | Microglia |
| Atp6v1b2 | Atp6v1b2 | 0.002379505 | 0.401538501 | 0.313 | 0.487 | 1 | Microglia |
| Ankhd1 | Ankhd1 | 0.002440584 | 0.331439987 | 0.412 | 0.662 | 1 | Microglia |
| Tbck | Tbck | 0.002463677 | 0.430506906 | 0.288 | 0.449 | 1 | Microglia |
| 4833420G17Rik | 4833420G17Rik | 0.00246746 | 0.336808343 | 0.171 | 0.256 | 1 | Microglia |
| Map41 | Map4 | 0.002483737 | 0.566709038 | 0.496 | 0.6 | 1 | Microglia |
| 1600010M07Rik | 1600010M07Rik | 0.002533767 | 0.346130155 | 0.177 | 0.264 | 1 | Microglia |
| Slc38a9 | Slc38a9 | 0.002582966 | 0.350252072 | 0.318 | 0.483 | 1 | Microglia |
| Mthfs | Mthfs | 0.002588739 | 0.80813214 | 0.288 | 0.289 | 1 | Microglia |
| Gatad2b | Gatad2b | 0.002649951 | 0.332720406 | 0.408 | 0.645 | 1 | Microglia |
| Dnajc5 | Dnajc5 | 0.002679568 | 0.416049868 | 0.261 | 0.393 | 1 | Microglia |
| Wdr891 | Wdr89 | 0.002757257 | 0.330906203 | 0.179 | 0.265 | 1 | Microglia |
| Enpp5 | Enpp5 | 0.002757906 | 0.309524175 | 0.169 | 0.253 | 1 | Microglia |
| Zfx | Zfx | 0.002880137 | 0.693880783 | 0.3 | 0.305 | 1 | Microglia |
| Hnrnpc | Hnrnpc | 0.002886525 | 0.370777266 | 0.329 | 0.509 | 1 | Microglia |
| Sec63 | Sec63 | 0.002986318 | 0.385362405 | 0.283 | 0.432 | 1 | Microglia |
| Peli1 | Peli1 | 0.003044832 | 0.762019173 | 0.409 | 0.488 | 1 | Microglia |
| Atg16l2 | Atg16l2 | 0.003093453 | 0.416169323 | 0.171 | 0.256 | 1 | Microglia |
| Arid5b | Arid5b | 0.00312313 | 0.365732236 | 0.259 | 0.38 | 1 | Microglia |
| Vps35 | Vps35 | 0.003227138 | 0.334515163 | 0.196 | 0.29 | 1 | Microglia |
| Ep300 | Ep300 | 0.003325821 | 0.696009167 | 0.393 | 0.458 | 1 | Microglia |
| Cnot61 | Cnot6 | 0.003335247 | 0.390687061 | 0.273 | 0.409 | 1 | Microglia |
| Dnmt3a1 | Dnmt3a | 0.003344816 | 0.402064654 | 0.592 | 0.771 | 1 | Microglia |
| Oxr11 | Oxr1 | 0.003368354 | 0.380211573 | 0.536 | 0.618 | 1 | Microglia |
| Wapl | Wapl | 0.00338293 | 0.721777335 | 0.414 | 0.49 | 1 | Microglia |
| Spred1 | Spred1 | 0.003510905 | 0.289426221 | 0.379 | 0.58 | 1 | Microglia |
| Ctcf1 | Ctcf | 0.003581256 | 0.343740697 | 0.216 | 0.321 | 1 | Microglia |
| Znrf1 | Znrf1 | 0.003672709 | 0.327522004 | 0.37 | 0.574 | 1 | Microglia |
| Scaf4 | Scaf4 | 0.003834105 | 0.378580703 | 0.229 | 0.343 | 1 | Microglia |
| Arpc2 | Arpc2 | 0.003843259 | 0.759046366 | 0.373 | 0.436 | 1 | Microglia |
| Stk31 | Stk3 | 0.003849353 | 0.613252558 | 0.278 | 0.273 | 1 | Microglia |
| Ireb2 | Ireb2 | 0.003937666 | 0.369752669 | 0.234 | 0.347 | 1 | Microglia |
| Bod1l | Bod1l | 0.003947833 | 0.404591535 | 0.294 | 0.445 | 1 | Microglia |
| Nrf11 | Nrf1 | 0.004013206 | 0.397260215 | 0.319 | 0.482 | 1 | Microglia |
| Arl151 | Arl15 | 0.004062761 | 0.307963232 | 0.648 | 0.739 | 1 | Microglia |
| Atp5f11 | Atp5f1 | 0.004171216 | 0.423459405 | 0.22 | 0.325 | 1 | Microglia |
| Plekhm31 | Plekhm3 | 0.004199941 | 0.387523207 | 0.344 | 0.537 | 1 | Microglia |
| Appbp2 | Appbp2 | 0.00426701 | 0.319055513 | 0.256 | 0.378 | 1 | Microglia |
| Lcor | Lcor | 0.00441422 | 0.257755307 | 0.411 | 0.648 | 1 | Microglia |
| Lrp12 | Lrp12 | 0.004434489 | 0.298170908 | 0.182 | 0.264 | 1 | Microglia |
| Tardbp1 | Tardbp | 0.00444458 | 0.398934 | 0.235 | 0.352 | 1 | Microglia |
| Cwf19l2 | Cwf19l2 | 0.004510495 | 0.3928455 | 0.216 | 0.317 | 1 | Microglia |
| Ube2h1 | Ube2h | 0.004544878 | 0.624926754 | 0.438 | 0.537 | 1 | Microglia |
| Zcchc7 | Zcchc7 | 0.004552769 | 0.329037981 | 0.645 | 0.843 | 1 | Microglia |
| Cab39 | Cab39 | 0.004617597 | 0.388026576 | 0.291 | 0.438 | 1 | Microglia |
| Atp11c | Atp11c | 0.004682564 | 0.349769072 | 0.265 | 0.39 | 1 | Microglia |
| Kmt2c1 | Kmt2c | 0.004883379 | 0.46857028 | 0.55 | 0.724 | 1 | Microglia |
| Mvb12b2 | Mvb12b | 0.00489887 | 0.678768361 | 0.354 | 0.395 | 1 | Microglia |
| Crk | Crk | 0.004933214 | 0.711839637 | 0.292 | 0.3 | 1 | Microglia |
| Zfc3h1 | Zfc3h1 | 0.004942874 | 0.407991278 | 0.254 | 0.376 | 1 | Microglia |
| Avl9 | Avl9 | 0.004969734 | 0.385500466 | 0.216 | 0.32 | 1 | Microglia |
| N4bp2l1 | N4bp2l1 | 0.004981324 | 0.445591825 | 0.209 | 0.311 | 1 | Microglia |
| Zfr | Zfr | 0.00502167 | 0.42494632 | 0.578 | 0.763 | 1 | Microglia |
| Ube2d2a1 | Ube2d2a | 0.005311014 | 0.344869387 | 0.292 | 0.439 | 1 | Microglia |
| Uhrf2 | Uhrf2 | 0.005481454 | 0.336905948 | 0.303 | 0.459 | 1 | Microglia |
| Tnrc181 | Tnrc18 | 0.005563202 | 0.680968912 | 0.395 | 0.465 | 1 | Microglia |
| Gabpb2 | Gabpb2 | 0.005779015 | 0.361901059 | 0.172 | 0.25 | 1 | Microglia |
| Rab5b | Rab5b | 0.00584384 | 0.332668127 | 0.182 | 0.265 | 1 | Microglia |
| Pcf11 | Pcf11 | 0.005880113 | 0.340473671 | 0.207 | 0.304 | 1 | Microglia |
| Smurf2 | Smurf2 | 0.00608357 | 0.616597351 | 0.431 | 0.528 | 1 | Microglia |
| Kpna41 | Kpna4 | 0.006168998 | 0.710474689 | 0.385 | 0.454 | 1 | Microglia |
| Wdr37 | Wdr37 | 0.006220093 | 0.378149588 | 0.335 | 0.513 | 1 | Microglia |
| Pum1 | Pum1 | 0.006607381 | 0.316278515 | 0.389 | 0.605 | 1 | Microglia |
| Thap3 | Thap3 | 0.006966814 | 0.369014441 | 0.179 | 0.259 | 1 | Microglia |
| Spopl | Spopl | 0.007061879 | 0.36179141 | 0.223 | 0.321 | 1 | Microglia |
| Arglu1 | Arglu1 | 0.007121377 | 0.513219529 | 0.534 | 0.716 | 1 | Microglia |
| Atp6v1a1 | Atp6v1a | 0.007197608 | 0.400364986 | 0.272 | 0.397 | 1 | Microglia |
| Slc43a2 | Slc43a2 | 0.007220758 | 0.29288034 | 0.18 | 0.258 | 1 | Microglia |
| Mllt111 | Mllt11 | 0.00729567 | 0.361344999 | 0.172 | 0.25 | 1 | Microglia |
| Immp2l | Immp2l | 0.007339919 | 0.360447945 | 0.444 | 0.659 | 1 | Microglia |
| Rc3h11 | Rc3h1 | 0.007493222 | 0.295700466 | 0.295 | 0.429 | 1 | Microglia |
| Zyg11b | Zyg11b | 0.007551794 | 0.382693193 | 0.267 | 0.389 | 1 | Microglia |
| Scaf111 | Scaf11 | 0.008316871 | 0.666298248 | 0.302 | 0.316 | 1 | Microglia |
| Slc30a9 | Slc30a9 | 0.00838122 | 0.414806113 | 0.25 | 0.367 | 1 | Microglia |
| Insr2 | Insr | 0.008551888 | 0.310393081 | 0.384 | 0.575 | 1 | Microglia |
| Chd1 | Chd1 | 0.009639418 | 0.419932786 | 0.272 | 0.405 | 1 | Microglia |
| Larp11 | Larp1 | 0.009649145 | 0.416947256 | 0.272 | 0.399 | 1 | Microglia |
| Dscam | Dscam | 0 | 3.507583326 | 0.99 | 0.306 | 0 | OPC |
| Vcan | Vcan | 0 | 2.96583544 | 0.892 | 0.129 | 0 | OPC |
| Sox61 | Sox6 | 0 | 2.938670546 | 0.952 | 0.224 | 0 | OPC |
| Nxph1 | Nxph1 | 0 | 2.867735244 | 0.868 | 0.188 | 0 | OPC |
| Gm4876 | Gm4876 | 0 | 2.85541474 | 0.817 | 0.062 | 0 | OPC |
| Megf11 | Megf11 | 0 | 2.74983516 | 0.784 | 0.085 | 0 | OPC |
| Ppfibp1 | Ppfibp1 | 0 | 2.703467369 | 0.805 | 0.078 | 0 | OPC |
| Arhgap311 | Arhgap31 | 0 | 2.569384103 | 0.853 | 0.083 | 0 | OPC |
| Sema5a | Sema5a | 0 | 2.544828201 | 0.748 | 0.125 | 0 | OPC |
| Pdgfra | Pdgfra | 0 | 2.503850909 | 0.712 | 0.026 | 0 | OPC |
| Itpr22 | Itpr2 | 0 | 2.456643052 | 0.853 | 0.111 | 0 | OPC |
| Abtb2 | Abtb2 | 0 | 2.371210593 | 0.791 | 0.087 | 0 | OPC |
| Kank1 | Kank1 | 0 | 2.177346703 | 0.74 | 0.046 | 0 | OPC |
| Sema3d | Sema3d | 0 | 2.076711994 | 0.704 | 0.038 | 0 | OPC |
| Kcnh8 | Kcnh8 | 0 | 2.057713769 | 0.656 | 0.059 | 0 | OPC |
| Emid1 | Emid1 | 0 | 1.850569435 | 0.565 | 0.044 | 0 | OPC |
| Plpp4 | Plpp4 | 0 | 1.799320704 | 0.572 | 0.036 | 0 | OPC |
| Cspg4 | Cspg4 | 0 | 1.779337235 | 0.567 | 0.015 | 0 | OPC |
| Shc4 | Shc4 | 0 | 1.730862154 | 0.579 | 0.015 | 0 | OPC |
| Afap1l2 | Afap1l2 | 0 | 1.601699227 | 0.562 | 0.027 | 0 | OPC |
| Matn4 | Matn4 | 0 | 1.548988146 | 0.548 | 0.023 | 0 | OPC |
| Calcrl | Calcrl | 0 | 1.528215619 | 0.442 | 0.038 | 0 | OPC |
| 3110035E14Rik | 3110035E14Rik | 0 | 1.493243288 | 0.471 | 0.018 | 0 | OPC |
| Prkcq1 | Prkcq | 0 | 1.485478095 | 0.639 | 0.079 | 0 | OPC |
| Rgcc | Rgcc | 0 | 1.356530227 | 0.454 | 0.036 | 0 | OPC |
| Neu4 | Neu4 | 0 | 1.34860321 | 0.418 | 0.004 | 0 | OPC |
| Sox101 | Sox10 | 0 | 1.311712786 | 0.611 | 0.072 | 0 | OPC |
| Ltbp1 | Ltbp1 | 0 | 1.279003719 | 0.363 | 0.024 | 0 | OPC |
| Gm38399 | Gm38399 | 0 | 1.273050347 | 0.433 | 0.023 | 0 | OPC |
| Car8 | Car8 | 0 | 1.177810788 | 0.363 | 0.024 | 0 | OPC |
| 6030407O03Rik | 6030407O03Rik | 0 | 1.16471134 | 0.361 | 0.012 | 0 | OPC |
| Tes | Tes | 0 | 1.074902323 | 0.305 | 0.014 | 0 | OPC |
| Scrg1 | Scrg1 | 0 | 1.02149823 | 0.387 | 0.027 | 0 | OPC |
| Gpr17 | Gpr17 | 0 | 1.01701704 | 0.346 | 0.016 | 0 | OPC |
| S100a3 | S100a3 | 0 | 0.96303441 | 0.308 | 0.007 | 0 | OPC |
| Galnt3 | Galnt3 | 0 | 0.936346842 | 0.281 | 0.009 | 0 | OPC |
| 5730559C18Rik | 5730559C18Rik | 0 | 0.908918869 | 0.298 | 0.003 | 0 | OPC |
| Susd5 | Susd5 | 0 | 0.863621152 | 0.26 | 0.003 | 0 | OPC |
| Nckap51 | Nckap5 | 1.26E-303 | 2.59082855 | 0.959 | 0.244 | 2.87E-299 | OPC |
| Gm33680 | Gm33680 | 2.83E-294 | 1.228312912 | 0.387 | 0.031 | 6.44E-290 | OPC |
| Etv4 | Etv4 | 6.47E-293 | 1.115854588 | 0.37 | 0.028 | 1.47E-288 | OPC |
| Fam19a1 | Fam19a1 | 1.05E-284 | 1.864795527 | 0.562 | 0.073 | 2.39E-280 | OPC |
| Sox51 | Sox5 | 2.72E-281 | 2.246536787 | 0.897 | 0.219 | 6.18E-277 | OPC |
| Xylt11 | Xylt1 | 9.60E-281 | 3.496123043 | 0.911 | 0.316 | 2.18E-276 | OPC |
| Tmem132d | Tmem132d | 5.24E-274 | 2.255967306 | 0.861 | 0.223 | 1.19E-269 | OPC |
| Tnr | Tnr | 5.23E-265 | 3.932506753 | 0.988 | 0.613 | 1.19E-260 | OPC |
| A930009A15Rik | A930009A15Rik | 1.14E-263 | 0.815781311 | 0.272 | 0.016 | 2.60E-259 | OPC |
| Sh3d191 | Sh3d19 | 4.79E-261 | 1.846919536 | 0.904 | 0.231 | 1.09E-256 | OPC |
| Luzp21 | Luzp2 | 1.16E-255 | 2.367769777 | 0.986 | 0.373 | 2.64E-251 | OPC |
| Sh3bp4 | Sh3bp4 | 3.20E-255 | 1.40805762 | 0.471 | 0.058 | 7.26E-251 | OPC |
| Cpq1 | Cpq | 1.25E-254 | 1.563589038 | 0.651 | 0.109 | 2.83E-250 | OPC |
| Sulf2 | Sulf2 | 2.29E-247 | 1.500767442 | 0.632 | 0.11 | 5.20E-243 | OPC |
| Tmem1631 | Tmem163 | 2.05E-244 | 2.0536786 | 0.632 | 0.105 | 4.66E-240 | OPC |
| Grin3a | Grin3a | 1.30E-241 | 2.013388417 | 0.733 | 0.162 | 2.94E-237 | OPC |
| Epn21 | Epn2 | 2.48E-240 | 2.664873658 | 0.974 | 0.511 | 5.63E-236 | OPC |
| Rin21 | Rin2 | 3.37E-238 | 1.459694346 | 0.579 | 0.091 | 7.67E-234 | OPC |
| Spon11 | Spon1 | 4.84E-235 | 1.886661801 | 0.752 | 0.169 | 1.10E-230 | OPC |
| Tns32 | Tns3 | 4.14E-234 | 2.254757502 | 0.695 | 0.138 | 9.41E-230 | OPC |
| Bcas11 | Bcas1 | 1.62E-229 | 2.482571525 | 0.767 | 0.16 | 3.67E-225 | OPC |
| Maml22 | Maml2 | 3.75E-224 | 2.136122268 | 0.954 | 0.337 | 8.53E-220 | OPC |
| Opcml1 | Opcml | 2.41E-211 | 2.159051524 | 0.995 | 0.796 | 5.46E-207 | OPC |
| 3632451O06Rik | 3632451O06Rik | 2.16E-208 | 1.44450861 | 0.538 | 0.097 | 4.90E-204 | OPC |
| Ptprz11 | Ptprz1 | 1.81E-204 | 2.551275025 | 0.93 | 0.44 | 4.10E-200 | OPC |
| Dpyd1 | Dpyd | 1.43E-201 | 2.1007527 | 0.858 | 0.315 | 3.24E-197 | OPC |
| Pcdh151 | Pcdh15 | 3.61E-201 | 2.551955746 | 0.928 | 0.423 | 8.20E-197 | OPC |
| Zcchc24 | Zcchc24 | 5.09E-201 | 1.208895163 | 0.486 | 0.071 | 1.16E-196 | OPC |
| Eya1 | Eya1 | 2.01E-199 | 1.317660767 | 0.433 | 0.061 | 4.56E-195 | OPC |
| Gjc31 | Gjc3 | 2.64E-198 | 1.296718841 | 0.7 | 0.14 | 6.00E-194 | OPC |
| Lnx1 | Lnx1 | 1.02E-193 | 1.58733883 | 0.558 | 0.113 | 2.32E-189 | OPC |
| Zfpm21 | Zfpm2 | 1.32E-193 | 1.567366395 | 0.837 | 0.228 | 3.00E-189 | OPC |
| 0610040J01Rik1 | 0610040J01Rik | 5.73E-192 | 1.007748174 | 0.411 | 0.053 | 1.30E-187 | OPC |
| Myt1 | Myt1 | 9.09E-192 | 1.605739458 | 0.627 | 0.15 | 2.06E-187 | OPC |
| Wipf12 | Wipf1 | 2.75E-190 | 1.508932012 | 0.736 | 0.175 | 6.24E-186 | OPC |
| Lhfpl3 | Lhfpl3 | 3.56E-189 | 3.559265162 | 0.916 | 0.629 | 8.09E-185 | OPC |
| Cobll11 | Cobll1 | 1.75E-186 | 1.237190683 | 0.603 | 0.114 | 3.97E-182 | OPC |
| Adarb2 | Adarb2 | 5.30E-182 | 1.280094531 | 0.913 | 0.348 | 1.20E-177 | OPC |
| Gpc51 | Gpc5 | 2.27E-177 | 1.717579392 | 0.887 | 0.323 | 5.17E-173 | OPC |
| Brinp31 | Brinp3 | 1.90E-175 | 2.465981541 | 0.918 | 0.541 | 4.33E-171 | OPC |
| Ostf1 | Ostf1 | 7.91E-175 | 0.820480855 | 0.291 | 0.029 | 1.80E-170 | OPC |
| Astn2 | Astn2 | 1.31E-174 | 1.863014569 | 0.913 | 0.421 | 2.97E-170 | OPC |
| Ncald1 | Ncald | 5.70E-174 | 1.836155668 | 0.8 | 0.274 | 1.30E-169 | OPC |
| Cdh202 | Cdh20 | 1.56E-167 | 1.675268589 | 0.829 | 0.248 | 3.54E-163 | OPC |
| Lsamp2 | Lsamp | 3.09E-167 | 1.173634766 | 1 | 0.97 | 7.02E-163 | OPC |
| Sez6l | Sez6l | 3.76E-164 | 1.514960501 | 0.647 | 0.169 | 8.55E-160 | OPC |
| E130114P18Rik | E130114P18Rik | 3.93E-162 | 1.097690279 | 0.387 | 0.056 | 8.92E-158 | OPC |
| Mtss1l1 | Mtss1l | 1.64E-161 | 1.22803712 | 0.543 | 0.115 | 3.73E-157 | OPC |
| Npas31 | Npas3 | 9.40E-161 | 1.627278767 | 0.952 | 0.419 | 2.14E-156 | OPC |
| Sema5b | Sema5b | 2.96E-160 | 1.438874025 | 0.606 | 0.15 | 6.72E-156 | OPC |
| Gm385051 | Gm38505 | 2.58E-157 | 1.259323159 | 0.726 | 0.212 | 5.86E-153 | OPC |
| Csmd2 | Csmd2 | 7.54E-155 | 1.702530594 | 0.901 | 0.528 | 1.71E-150 | OPC |
| Ntn1 | Ntn1 | 1.18E-152 | 1.395769524 | 0.543 | 0.127 | 2.69E-148 | OPC |
| Arhgap24 | Arhgap24 | 4.35E-151 | 2.042681478 | 0.558 | 0.137 | 9.88E-147 | OPC |
| Hunk | Hunk | 1.58E-140 | 0.957769048 | 0.341 | 0.051 | 3.59E-136 | OPC |
| Prrx11 | Prrx1 | 2.36E-140 | 0.915826008 | 0.377 | 0.059 | 5.37E-136 | OPC |
| Cald11 | Cald1 | 3.41E-139 | 1.095762661 | 0.546 | 0.126 | 7.75E-135 | OPC |
| Bcas1os2 | Bcas1os2 | 1.30E-137 | 1.327702887 | 0.317 | 0.044 | 2.95E-133 | OPC |
| Cacng4 | Cacng4 | 4.78E-136 | 1.933688136 | 0.786 | 0.396 | 1.09E-131 | OPC |
| Lima1 | Lima1 | 1.38E-134 | 1.281736705 | 0.55 | 0.139 | 3.13E-130 | OPC |
| Erbb42 | Erbb4 | 5.90E-134 | 1.085690969 | 0.998 | 0.708 | 1.34E-129 | OPC |
| Lrrc4c1 | Lrrc4c | 3.67E-132 | 1.252153014 | 0.998 | 0.936 | 8.34E-128 | OPC |
| Gm42948 | Gm42948 | 8.99E-132 | 0.822111883 | 0.272 | 0.035 | 2.04E-127 | OPC |
| Bcan1 | Bcan | 6.53E-131 | 1.036214222 | 0.538 | 0.126 | 1.48E-126 | OPC |
| Mir9-3hg1 | Mir9-3hg | 5.50E-128 | 1.801270721 | 0.8 | 0.416 | 1.25E-123 | OPC |
| Sgcd1 | Sgcd | 3.51E-127 | 1.68696104 | 0.889 | 0.615 | 7.97E-123 | OPC |
| Grik4 | Grik4 | 5.79E-127 | 1.405608386 | 0.702 | 0.263 | 1.32E-122 | OPC |
| Lrp4 | Lrp4 | 1.07E-125 | 0.790643229 | 0.317 | 0.046 | 2.43E-121 | OPC |
| Tmem108 | Tmem108 | 5.30E-125 | 2.317879382 | 0.601 | 0.173 | 1.20E-120 | OPC |
| Ptprt1 | Ptprt | 3.97E-124 | 1.560505816 | 0.928 | 0.634 | 9.01E-120 | OPC |
| Smoc1 | Smoc1 | 5.32E-123 | 0.817373242 | 0.312 | 0.048 | 1.21E-118 | OPC |
| Lrmda1 | Lrmda | 2.70E-122 | 1.053071769 | 0.579 | 0.151 | 6.14E-118 | OPC |
| Rnf43 | Rnf43 | 6.13E-122 | 1.021353158 | 0.341 | 0.058 | 1.39E-117 | OPC |
| Nav1 | Nav1 | 8.81E-122 | 1.430521174 | 0.851 | 0.482 | 2.00E-117 | OPC |
| Usp241 | Usp24 | 1.73E-121 | 1.647202354 | 0.839 | 0.508 | 3.93E-117 | OPC |
| Pde4d1 | Pde4d | 1.09E-119 | 1.286001929 | 0.969 | 0.637 | 2.47E-115 | OPC |
| Ptprg | Ptprg | 3.43E-119 | 1.404160084 | 0.882 | 0.49 | 7.79E-115 | OPC |
| Lpcat21 | Lpcat2 | 3.67E-119 | 0.942507893 | 0.45 | 0.1 | 8.34E-115 | OPC |
| Grik1 | Grik1 | 1.52E-118 | 1.248119177 | 0.57 | 0.154 | 3.45E-114 | OPC |
| Cntn11 | Cntn1 | 2.06E-116 | 1.3533078 | 0.966 | 0.751 | 4.68E-112 | OPC |
| Eps81 | Eps8 | 4.05E-116 | 1.110363316 | 0.51 | 0.131 | 9.19E-112 | OPC |
| Pid12 | Pid1 | 5.92E-116 | 1.766955733 | 0.82 | 0.464 | 1.34E-111 | OPC |
| Dscaml11 | Dscaml1 | 6.20E-116 | 1.467713525 | 0.918 | 0.648 | 1.41E-111 | OPC |
| Sema6d | Sema6d | 9.54E-116 | 1.591030433 | 0.933 | 0.653 | 2.17E-111 | OPC |
| Fign1 | Fign | 3.68E-115 | 1.172933976 | 0.625 | 0.192 | 8.36E-111 | OPC |
| Cdh131 | Cdh13 | 4.12E-115 | 1.332242645 | 0.877 | 0.472 | 9.36E-111 | OPC |
| Cdk142 | Cdk14 | 7.47E-115 | 1.671416121 | 0.839 | 0.42 | 1.70E-110 | OPC |
| Slc35f11 | Slc35f1 | 3.82E-113 | 1.419600263 | 0.933 | 0.693 | 8.67E-109 | OPC |
| Nrxn21 | Nrxn2 | 4.28E-113 | 1.505022756 | 0.832 | 0.482 | 9.73E-109 | OPC |
| Chd73 | Chd7 | 1.22E-112 | 1.117884499 | 0.731 | 0.256 | 2.76E-108 | OPC |
| Nav31 | Nav3 | 1.28E-112 | 1.542437942 | 0.93 | 0.784 | 2.90E-108 | OPC |
| 2610035D17Rik2 | 2610035D17Rik | 6.35E-112 | 1.602872853 | 0.772 | 0.366 | 1.44E-107 | OPC |
| Zeb11 | Zeb1 | 1.37E-111 | 1.574254433 | 0.918 | 0.779 | 3.11E-107 | OPC |
| Nav21 | Nav2 | 1.98E-110 | 1.342161137 | 0.959 | 0.728 | 4.51E-106 | OPC |
| Ppp1r14c | Ppp1r14c | 5.41E-109 | 1.18705318 | 0.502 | 0.146 | 1.23E-104 | OPC |
| Fchsd22 | Fchsd2 | 5.88E-109 | 1.260746778 | 0.921 | 0.706 | 1.34E-104 | OPC |
| Chst11 | Chst11 | 8.52E-109 | 1.764550888 | 0.791 | 0.504 | 1.93E-104 | OPC |
| Msrb3 | Msrb3 | 4.16E-107 | 1.135972755 | 0.406 | 0.097 | 9.46E-103 | OPC |
| Tox1 | Tox | 4.68E-106 | 1.254260721 | 0.668 | 0.23 | 1.06E-101 | OPC |
| Tcf42 | Tcf4 | 2.25E-105 | 1.151083186 | 0.974 | 0.678 | 5.12E-101 | OPC |
| Pcdh71 | Pcdh7 | 8.95E-105 | 1.294579543 | 0.974 | 0.702 | 2.03E-100 | OPC |
| Gsap1 | Gsap | 9.35E-105 | 0.849542792 | 0.356 | 0.069 | 2.12E-100 | OPC |
| Cp | Cp | 5.75E-102 | 0.792199872 | 0.269 | 0.043 | 1.31E-97 | OPC |
| Galnt10 | Galnt10 | 8.77E-102 | 1.128995705 | 0.476 | 0.137 | 1.99E-97 | OPC |
| Tmem196 | Tmem196 | 1.18E-101 | 1.082825099 | 0.43 | 0.109 | 2.69E-97 | OPC |
| Kcnip1 | Kcnip1 | 6.97E-101 | 1.239042491 | 0.555 | 0.17 | 1.58E-96 | OPC |
| Adam121 | Adam12 | 9.14E-101 | 1.477800507 | 0.647 | 0.265 | 2.08E-96 | OPC |
| Plxnb31 | Plxnb3 | 3.92E-100 | 0.714877249 | 0.296 | 0.049 | 8.90E-96 | OPC |
| Dock91 | Dock9 | 4.51E-100 | 1.428136932 | 0.81 | 0.477 | 1.03E-95 | OPC |
| 1810041L15Rik | 1810041L15Rik | 7.13E-100 | 0.633798118 | 0.257 | 0.04 | 1.62E-95 | OPC |
| Gfra11 | Gfra1 | 3.23E-99 | 1.040986244 | 0.591 | 0.187 | 7.34E-95 | OPC |
| Nrxn11 | Nrxn1 | 7.04E-99 | 1.259404357 | 0.964 | 0.924 | 1.60E-94 | OPC |
| Ust | Ust | 1.04E-98 | 1.961674475 | 0.736 | 0.374 | 2.37E-94 | OPC |
| Itga91 | Itga9 | 1.10E-98 | 1.444259172 | 0.541 | 0.187 | 2.50E-94 | OPC |
| Cask1 | Cask | 1.43E-98 | 1.358725734 | 0.863 | 0.648 | 3.26E-94 | OPC |
| Sdk12 | Sdk1 | 1.58E-98 | 1.193480223 | 0.623 | 0.219 | 3.59E-94 | OPC |
| Kcnk101 | Kcnk10 | 3.10E-98 | 1.073810248 | 0.459 | 0.124 | 7.04E-94 | OPC |
| Gm37641 | Gm3764 | 1.12E-97 | 1.170873655 | 0.772 | 0.371 | 2.55E-93 | OPC |
| Unc5c1 | Unc5c | 2.41E-97 | 1.188362471 | 0.959 | 0.69 | 5.48E-93 | OPC |
| Fam155a1 | Fam155a | 8.73E-97 | 1.349060675 | 0.885 | 0.537 | 1.98E-92 | OPC |
| Tanc11 | Tanc1 | 1.01E-96 | 1.075070761 | 0.526 | 0.161 | 2.29E-92 | OPC |
| Rev3l | Rev3l | 8.98E-94 | 1.330626841 | 0.87 | 0.634 | 2.04E-89 | OPC |
| Rtl41 | Rtl4 | 9.61E-94 | 1.557512979 | 0.555 | 0.19 | 2.18E-89 | OPC |
| Hip11 | Hip1 | 1.12E-93 | 1.245328281 | 0.752 | 0.395 | 2.55E-89 | OPC |
| Ptprk1 | Ptprk | 4.17E-93 | 0.853622588 | 0.733 | 0.261 | 9.47E-89 | OPC |
| Pde3a | Pde3a | 4.19E-93 | 0.802361158 | 0.305 | 0.057 | 9.51E-89 | OPC |
| Prkg2 | Prkg2 | 1.68E-92 | 1.03978039 | 0.361 | 0.087 | 3.81E-88 | OPC |
| Ugdh | Ugdh | 2.00E-92 | 1.010227087 | 0.392 | 0.1 | 4.55E-88 | OPC |
| Sntg11 | Sntg1 | 3.39E-92 | 1.178269597 | 0.916 | 0.731 | 7.70E-88 | OPC |
| Zfp462 | Zfp462 | 5.18E-92 | 1.443027328 | 0.853 | 0.621 | 1.18E-87 | OPC |
| Cyp2j6 | Cyp2j6 | 9.62E-92 | 0.683460776 | 0.3 | 0.056 | 2.18E-87 | OPC |
| Asrgl11 | Asrgl1 | 1.64E-91 | 0.873572711 | 0.536 | 0.162 | 3.72E-87 | OPC |
| Tox31 | Tox3 | 3.12E-90 | 0.870932902 | 0.488 | 0.14 | 7.08E-86 | OPC |
| Olfm2 | Olfm2 | 3.96E-90 | 1.203883872 | 0.423 | 0.12 | 8.99E-86 | OPC |
| Evi5l1 | Evi5l | 7.67E-89 | 1.21723856 | 0.685 | 0.333 | 1.74E-84 | OPC |
| Dlgap11 | Dlgap1 | 1.36E-88 | 0.930100863 | 0.966 | 0.798 | 3.10E-84 | OPC |
| Stard92 | Stard9 | 2.06E-88 | 1.072687307 | 0.526 | 0.169 | 4.69E-84 | OPC |
| Grid21 | Grid2 | 2.79E-88 | 0.799197543 | 0.993 | 0.92 | 6.33E-84 | OPC |
| Zfp36l1 | Zfp36l1 | 4.74E-88 | 0.852181071 | 0.332 | 0.069 | 1.08E-83 | OPC |
| Phldb11 | Phldb1 | 2.24E-86 | 0.719844567 | 0.63 | 0.208 | 5.10E-82 | OPC |
| Tshz3 | Tshz3 | 1.15E-85 | 0.875197233 | 0.385 | 0.097 | 2.62E-81 | OPC |
| Cspg51 | Cspg5 | 5.02E-85 | 1.376586622 | 0.736 | 0.404 | 1.14E-80 | OPC |
| Qk3 | Qk | 3.06E-83 | 1.071185684 | 0.976 | 0.758 | 6.95E-79 | OPC |
| Tcf7l22 | Tcf7l2 | 1.23E-81 | 1.896749395 | 0.517 | 0.159 | 2.79E-77 | OPC |
| Fbxl7 | Fbxl7 | 6.08E-80 | 0.913910408 | 0.325 | 0.074 | 1.38E-75 | OPC |
| Ncam21 | Ncam2 | 2.74E-79 | 0.960382999 | 0.983 | 0.854 | 6.21E-75 | OPC |
| Ralyl1 | Ralyl | 1.10E-78 | 1.071251937 | 0.916 | 0.651 | 2.49E-74 | OPC |
| B3gat2 | B3gat2 | 2.85E-78 | 0.921065809 | 0.322 | 0.079 | 6.48E-74 | OPC |
| Zeb23 | Zeb2 | 5.62E-78 | 0.772486665 | 0.916 | 0.417 | 1.28E-73 | OPC |
| Jam2 | Jam2 | 1.51E-77 | 0.640756708 | 0.288 | 0.059 | 3.43E-73 | OPC |
| Ankrd111 | Ankrd11 | 1.15E-75 | 1.077979098 | 0.882 | 0.742 | 2.62E-71 | OPC |
| Nova1 | Nova1 | 1.83E-74 | 1.151002636 | 0.76 | 0.464 | 4.15E-70 | OPC |
| Mmp161 | Mmp16 | 2.73E-74 | 1.407688683 | 0.844 | 0.694 | 6.21E-70 | OPC |
| Klhl51 | Klhl5 | 1.99E-73 | 1.057764386 | 0.512 | 0.193 | 4.52E-69 | OPC |
| Hip1r | Hip1r | 2.01E-73 | 0.987036396 | 0.474 | 0.171 | 4.57E-69 | OPC |
| Akap132 | Akap13 | 3.94E-73 | 0.984245733 | 0.584 | 0.246 | 8.94E-69 | OPC |
| Dock13 | Dock1 | 1.77E-72 | 0.864740666 | 0.74 | 0.335 | 4.02E-68 | OPC |
| Arhgap351 | Arhgap35 | 1.92E-72 | 1.36921709 | 0.733 | 0.457 | 4.37E-68 | OPC |
| Csmd11 | Csmd1 | 2.16E-71 | 0.800326343 | 0.986 | 0.887 | 4.91E-67 | OPC |
| Svil | Svil | 2.16E-71 | 1.267309956 | 0.57 | 0.255 | 4.91E-67 | OPC |
| 4932443L11Rik | 4932443L11Rik | 2.10E-70 | 1.076561405 | 0.531 | 0.223 | 4.77E-66 | OPC |
| Ptpre | Ptpre | 2.28E-69 | 1.13231428 | 0.639 | 0.344 | 5.17E-65 | OPC |
| Fyn | Fyn | 3.09E-69 | 2.1969296 | 0.745 | 0.518 | 7.02E-65 | OPC |
| Pcdh11x | Pcdh11x | 3.36E-69 | 1.20677925 | 0.844 | 0.58 | 7.62E-65 | OPC |
| Cux2 | Cux2 | 6.36E-69 | 0.905281968 | 0.486 | 0.177 | 1.44E-64 | OPC |
| Tshz2 | Tshz2 | 2.52E-68 | 0.860710554 | 0.495 | 0.168 | 5.72E-64 | OPC |
| Creb3l2 | Creb3l2 | 4.08E-68 | 0.730855292 | 0.358 | 0.097 | 9.26E-64 | OPC |
| P2rx71 | P2rx7 | 1.02E-67 | 0.558024287 | 0.274 | 0.058 | 2.31E-63 | OPC |
| Aff21 | Aff2 | 2.51E-67 | 0.94089999 | 0.56 | 0.226 | 5.70E-63 | OPC |
| Gng122 | Gng12 | 3.32E-67 | 0.97822531 | 0.5 | 0.176 | 7.53E-63 | OPC |
| 12-Mar | 1-Mar | 4.08E-67 | 1.208634929 | 0.851 | 0.676 | 9.28E-63 | OPC |
| Gm207541 | Gm20754 | 6.40E-67 | 1.259525552 | 0.721 | 0.414 | 1.45E-62 | OPC |
| Fbn2 | Fbn2 | 8.33E-66 | 0.865270848 | 0.361 | 0.104 | 1.89E-61 | OPC |
| Pcdh91 | Pcdh9 | 2.71E-65 | 0.450998935 | 0.995 | 0.973 | 6.15E-61 | OPC |
| Dpysl3 | Dpysl3 | 9.55E-65 | 0.889060651 | 0.406 | 0.134 | 2.17E-60 | OPC |
| Arhgef281 | Arhgef28 | 1.17E-64 | 0.961882551 | 0.529 | 0.199 | 2.66E-60 | OPC |
| Diaph3 | Diaph3 | 7.59E-64 | 0.567852889 | 0.293 | 0.071 | 1.72E-59 | OPC |
| Nfia3 | Nfia | 9.48E-64 | 0.559459576 | 0.875 | 0.418 | 2.15E-59 | OPC |
| Thsd7b1 | Thsd7b | 2.50E-63 | 0.857385577 | 0.5 | 0.186 | 5.68E-59 | OPC |
| Map4k43 | Map4k4 | 3.11E-63 | 1.053575485 | 0.793 | 0.537 | 7.05E-59 | OPC |
| Dmd1 | Dmd | 4.58E-63 | 0.906746198 | 0.95 | 0.81 | 1.04E-58 | OPC |
| Ampd3 | Ampd3 | 8.73E-63 | 1.046212521 | 0.416 | 0.152 | 1.98E-58 | OPC |
| Acss12 | Acss1 | 1.61E-62 | 0.581683065 | 0.382 | 0.106 | 3.65E-58 | OPC |
| 1700025G04Rik | 1700025G04Rik | 4.36E-62 | 1.215054905 | 0.625 | 0.345 | 9.90E-58 | OPC |
| Zfp6082 | Zfp608 | 9.66E-62 | 0.879098686 | 0.757 | 0.415 | 2.19E-57 | OPC |
| Pld12 | Pld1 | 1.26E-61 | 0.697451576 | 0.373 | 0.105 | 2.86E-57 | OPC |
| Ppp2r2b1 | Ppp2r2b | 1.34E-61 | 1.018757267 | 0.921 | 0.788 | 3.04E-57 | OPC |
| Fmnl22 | Fmnl2 | 3.59E-61 | 1.053014445 | 0.788 | 0.453 | 8.14E-57 | OPC |
| Nfib1 | Nfib | 3.69E-61 | 0.41343978 | 0.812 | 0.359 | 8.39E-57 | OPC |
| Rnf144a | Rnf144a | 1.20E-60 | 1.018060002 | 0.587 | 0.288 | 2.73E-56 | OPC |
| Ednrb | Ednrb | 1.75E-60 | 0.723890889 | 0.267 | 0.063 | 3.98E-56 | OPC |
| Zfp5211 | Zfp521 | 1.93E-60 | 0.84713294 | 0.553 | 0.227 | 4.37E-56 | OPC |
| Olig1 | Olig1 | 1.30E-59 | 0.597515204 | 0.286 | 0.072 | 2.96E-55 | OPC |
| Slc9a92 | Slc9a9 | 2.05E-59 | 0.827642106 | 0.719 | 0.376 | 4.67E-55 | OPC |
| Zmiz12 | Zmiz1 | 2.44E-59 | 0.878185509 | 0.601 | 0.278 | 5.53E-55 | OPC |
| Gm26883 | Gm26883 | 2.56E-59 | 0.902984188 | 0.353 | 0.107 | 5.82E-55 | OPC |
| Farp11 | Farp1 | 1.80E-58 | 0.589496096 | 0.697 | 0.312 | 4.09E-54 | OPC |
| Sema6a2 | Sema6a | 5.08E-58 | 1.193021132 | 0.608 | 0.272 | 1.15E-53 | OPC |
| Kcnip31 | Kcnip3 | 1.19E-57 | 1.343537956 | 0.688 | 0.472 | 2.69E-53 | OPC |
| Mb21d2 | Mb21d2 | 8.51E-57 | 1.040777578 | 0.529 | 0.261 | 1.93E-52 | OPC |
| Sorcs31 | Sorcs3 | 8.02E-56 | 1.009984954 | 0.752 | 0.51 | 1.82E-51 | OPC |
| Phka11 | Phka1 | 1.47E-55 | 0.695651355 | 0.464 | 0.166 | 3.33E-51 | OPC |
| Plce11 | Plce1 | 2.89E-55 | 0.930618169 | 0.502 | 0.214 | 6.56E-51 | OPC |
| Gm29514 | Gm29514 | 5.17E-55 | 1.034551775 | 0.394 | 0.148 | 1.17E-50 | OPC |
| Ptpro1 | Ptpro | 2.27E-54 | 1.162082013 | 0.615 | 0.35 | 5.16E-50 | OPC |
| Slc1a11 | Slc1a1 | 6.56E-54 | 1.176062886 | 0.606 | 0.367 | 1.49E-49 | OPC |
| Mpzl11 | Mpzl1 | 8.78E-54 | 1.624187626 | 0.5 | 0.234 | 1.99E-49 | OPC |
| Dpf31 | Dpf3 | 3.33E-53 | 0.623586949 | 0.286 | 0.076 | 7.56E-49 | OPC |
| Rab312 | Rab31 | 1.94E-52 | 0.685197266 | 0.591 | 0.25 | 4.40E-48 | OPC |
| Prkg11 | Prkg1 | 2.17E-52 | 0.691099229 | 0.901 | 0.584 | 4.93E-48 | OPC |
| Agap11 | Agap1 | 3.82E-52 | 0.838678836 | 0.882 | 0.767 | 8.68E-48 | OPC |
| Fbn1 | Fbn1 | 1.76E-51 | 0.692178792 | 0.279 | 0.081 | 4.00E-47 | OPC |
| Phactr3 | Phactr3 | 2.83E-51 | 0.86341793 | 0.805 | 0.624 | 6.44E-47 | OPC |
| Cdo1 | Cdo1 | 3.45E-51 | 0.82077292 | 0.303 | 0.095 | 7.84E-47 | OPC |
| Trio1 | Trio | 3.60E-51 | 0.884705078 | 0.832 | 0.683 | 8.18E-47 | OPC |
| Tcf7l11 | Tcf7l1 | 4.62E-51 | 0.92021939 | 0.296 | 0.085 | 1.05E-46 | OPC |
| Ankrd281 | Ankrd28 | 8.82E-51 | 0.841580725 | 0.82 | 0.666 | 2.00E-46 | OPC |
| Cdc14a | Cdc14a | 1.06E-50 | 0.536151791 | 0.31 | 0.089 | 2.40E-46 | OPC |
| Dnm31 | Dnm3 | 1.73E-50 | 0.847193692 | 0.935 | 0.814 | 3.92E-46 | OPC |
| Enpp21 | Enpp2 | 2.45E-50 | 0.277741788 | 0.651 | 0.283 | 5.56E-46 | OPC |
| Abhd2 | Abhd2 | 7.92E-50 | 1.180628277 | 0.642 | 0.433 | 1.80E-45 | OPC |
| Cd91 | Cd9 | 1.21E-49 | 0.742991349 | 0.385 | 0.134 | 2.74E-45 | OPC |
| Shisa6 | Shisa6 | 1.60E-49 | 0.809278907 | 0.32 | 0.102 | 3.63E-45 | OPC |
| Nmnat21 | Nmnat2 | 3.36E-49 | 1.07009676 | 0.707 | 0.52 | 7.63E-45 | OPC |
| Csmd32 | Csmd3 | 3.51E-49 | 0.571076123 | 0.986 | 0.918 | 7.98E-45 | OPC |
| Anks1b1 | Anks1b | 4.55E-49 | 0.630069453 | 0.995 | 0.911 | 1.03E-44 | OPC |
| Grid11 | Grid1 | 4.87E-49 | 0.726724393 | 0.942 | 0.736 | 1.11E-44 | OPC |
| Cbfb | Cbfb | 5.20E-49 | 0.581535646 | 0.308 | 0.091 | 1.18E-44 | OPC |
| Cdh6 | Cdh6 | 1.14E-48 | 0.997179208 | 0.45 | 0.199 | 2.58E-44 | OPC |
| Fam19a21 | Fam19a2 | 1.05E-47 | 1.029833619 | 0.678 | 0.413 | 2.39E-43 | OPC |
| Ptprj1 | Ptprj | 1.46E-47 | 1.445285273 | 0.75 | 0.602 | 3.33E-43 | OPC |
| Wscd11 | Wscd1 | 3.40E-47 | 0.491649359 | 0.346 | 0.109 | 7.72E-43 | OPC |
| Stk32a1 | Stk32a | 9.83E-47 | 1.132863702 | 0.632 | 0.397 | 2.23E-42 | OPC |
| Snx25 | Snx25 | 1.01E-45 | 0.947648817 | 0.632 | 0.422 | 2.30E-41 | OPC |
| Ttc282 | Ttc28 | 1.42E-45 | 0.63917744 | 0.587 | 0.273 | 3.23E-41 | OPC |
| Nlgn11 | Nlgn1 | 2.29E-45 | 0.59570032 | 1 | 0.949 | 5.21E-41 | OPC |
| Gpt2 | Gpt2 | 4.11E-45 | 0.882173284 | 0.375 | 0.152 | 9.34E-41 | OPC |
| CT009510.2 | CT009510.2 | 9.52E-45 | 2.614005725 | 0.288 | 0.098 | 2.16E-40 | OPC |
| Nf12 | Nf1 | 1.17E-44 | 0.716007668 | 0.863 | 0.765 | 2.66E-40 | OPC |
| Creb51 | Creb5 | 2.38E-43 | 0.68389024 | 0.418 | 0.15 | 5.39E-39 | OPC |
| Prex12 | Prex1 | 5.07E-43 | 0.7730548 | 0.524 | 0.267 | 1.15E-38 | OPC |
| Cdh102 | Cdh10 | 6.34E-43 | 0.728583545 | 0.851 | 0.668 | 1.44E-38 | OPC |
| Rftn21 | Rftn2 | 6.47E-43 | 0.522561783 | 0.272 | 0.078 | 1.47E-38 | OPC |
| Sash11 | Sash1 | 9.16E-43 | 0.763273165 | 0.618 | 0.349 | 2.08E-38 | OPC |
| Gal3st11 | Gal3st1 | 5.87E-42 | 0.4883146 | 0.269 | 0.078 | 1.33E-37 | OPC |
| Kcnd31 | Kcnd3 | 1.47E-41 | 0.952102895 | 0.63 | 0.395 | 3.34E-37 | OPC |
| Ikzf22 | Ikzf2 | 2.54E-41 | 0.564574899 | 0.418 | 0.165 | 5.77E-37 | OPC |
| Dner | Dner | 6.05E-41 | 0.871951084 | 0.526 | 0.265 | 1.37E-36 | OPC |
| Gab11 | Gab1 | 7.24E-41 | 0.447360391 | 0.572 | 0.252 | 1.65E-36 | OPC |
| Plpp31 | Plpp3 | 8.29E-41 | 0.294071775 | 0.587 | 0.276 | 1.88E-36 | OPC |
| Cntn61 | Cntn6 | 1.84E-40 | 1.042694964 | 0.644 | 0.452 | 4.19E-36 | OPC |
| Inpp4b2 | Inpp4b | 2.15E-40 | 0.665333681 | 0.632 | 0.358 | 4.88E-36 | OPC |
| Ick1 | Ick | 3.00E-40 | 0.740729006 | 0.387 | 0.158 | 6.82E-36 | OPC |
| Ankrd442 | Ankrd44 | 3.17E-40 | 0.846119882 | 0.464 | 0.208 | 7.19E-36 | OPC |
| Map3k1 | Map3k1 | 1.18E-39 | 0.71297287 | 0.332 | 0.129 | 2.67E-35 | OPC |
| Dennd2a | Dennd2a | 1.43E-39 | 0.804111311 | 0.447 | 0.217 | 3.24E-35 | OPC |
| Adgrv1 | Adgrv1 | 1.80E-39 | 0.44563991 | 0.255 | 0.075 | 4.09E-35 | OPC |
| Ppm1e1 | Ppm1e | 6.63E-39 | 0.677434271 | 0.599 | 0.303 | 1.51E-34 | OPC |
| Frmd4a2 | Frmd4a | 6.99E-39 | 1.31130813 | 0.526 | 0.828 | 1.59E-34 | OPC |
| Csgalnact11 | Csgalnact1 | 8.94E-39 | 0.940338434 | 0.538 | 0.279 | 2.03E-34 | OPC |
| Pstpip21 | Pstpip2 | 1.00E-38 | 0.643729808 | 0.38 | 0.144 | 2.28E-34 | OPC |
| Gpc62 | Gpc6 | 1.22E-38 | 0.725632045 | 0.844 | 0.632 | 2.77E-34 | OPC |
| Prtg | Prtg | 1.40E-38 | 0.642328358 | 0.293 | 0.104 | 3.18E-34 | OPC |
| Hipk22 | Hipk2 | 1.74E-38 | 0.534996652 | 0.692 | 0.39 | 3.96E-34 | OPC |
| Adamts6 | Adamts6 | 1.98E-38 | 0.777637268 | 0.464 | 0.221 | 4.51E-34 | OPC |
| Atp1a21 | Atp1a2 | 2.81E-38 | 0.288607865 | 0.505 | 0.225 | 6.39E-34 | OPC |
| Il1rap1 | Il1rap | 5.87E-38 | 0.557313156 | 0.546 | 0.272 | 1.33E-33 | OPC |
| Sipa1l21 | Sipa1l2 | 7.04E-38 | 0.513263783 | 0.276 | 0.09 | 1.60E-33 | OPC |
| Klf122 | Klf12 | 1.36E-37 | 0.787940865 | 0.798 | 0.707 | 3.09E-33 | OPC |
| Plppr51 | Plppr5 | 3.19E-37 | 0.931943042 | 0.63 | 0.452 | 7.25E-33 | OPC |
| Fbxo71 | Fbxo7 | 7.47E-37 | 0.597079815 | 0.356 | 0.143 | 1.70E-32 | OPC |
| Ankfn1 | Ankfn1 | 1.08E-36 | 0.387695727 | 0.315 | 0.11 | 2.45E-32 | OPC |
| Il1rapl11 | Il1rapl1 | 1.42E-36 | 0.48406547 | 1 | 0.944 | 3.22E-32 | OPC |
| Ugt8a1 | Ugt8a | 2.89E-36 | 0.378065752 | 0.464 | 0.194 | 6.56E-32 | OPC |
| Gm203881 | Gm20388 | 4.59E-36 | 0.66526648 | 0.962 | 0.909 | 1.04E-31 | OPC |
| Prkd31 | Prkd3 | 7.68E-36 | 0.407818495 | 0.317 | 0.11 | 1.74E-31 | OPC |
| Col11a1 | Col11a1 | 9.36E-36 | 0.570675961 | 0.264 | 0.089 | 2.13E-31 | OPC |
| Brinp11 | Brinp1 | 2.36E-35 | 0.729184877 | 0.851 | 0.659 | 5.37E-31 | OPC |
| Gatm1 | Gatm | 4.36E-35 | 0.30842093 | 0.447 | 0.183 | 9.91E-31 | OPC |
| Pdlim51 | Pdlim5 | 4.90E-35 | 0.489435119 | 0.361 | 0.139 | 1.11E-30 | OPC |
| Gm15398 | Gm15398 | 5.68E-35 | 0.716800887 | 0.361 | 0.149 | 1.29E-30 | OPC |
| Itgb81 | Itgb8 | 5.88E-35 | 0.665845003 | 0.411 | 0.189 | 1.34E-30 | OPC |
| Prkca1 | Prkca | 1.02E-34 | 0.734869461 | 0.812 | 0.671 | 2.31E-30 | OPC |
| Rasa32 | Rasa3 | 1.37E-34 | 0.575888903 | 0.421 | 0.193 | 3.11E-30 | OPC |
| Elf12 | Elf1 | 2.41E-34 | 0.452474359 | 0.349 | 0.133 | 5.47E-30 | OPC |
| Sox8 | Sox8 | 4.66E-34 | 0.596163162 | 0.334 | 0.138 | 1.06E-29 | OPC |
| Dpp101 | Dpp10 | 6.25E-34 | 0.641326298 | 0.858 | 0.662 | 1.42E-29 | OPC |
| Slc24a31 | Slc24a3 | 1.94E-33 | 0.696467824 | 0.712 | 0.474 | 4.40E-29 | OPC |
| Kif13a1 | Kif13a | 2.25E-33 | 0.596064879 | 0.659 | 0.429 | 5.12E-29 | OPC |
| Vwc2 | Vwc2 | 3.51E-33 | 0.557285576 | 0.262 | 0.09 | 7.98E-29 | OPC |
| Khdrbs21 | Khdrbs2 | 1.24E-32 | 0.675314999 | 0.75 | 0.531 | 2.81E-28 | OPC |
| Bach22 | Bach2 | 1.29E-32 | 0.713679096 | 0.716 | 0.502 | 2.94E-28 | OPC |
| Sh3rf11 | Sh3rf1 | 2.00E-32 | 1.20054726 | 0.522 | 0.336 | 4.53E-28 | OPC |
| Lcorl1 | Lcorl | 3.98E-32 | 0.96573497 | 0.712 | 0.577 | 9.05E-28 | OPC |
| Gpcpd1 | Gpcpd1 | 1.45E-31 | 0.721315296 | 0.678 | 0.531 | 3.29E-27 | OPC |
| Lrrtm41 | Lrrtm4 | 2.13E-31 | 0.545697566 | 0.964 | 0.836 | 4.84E-27 | OPC |
| Snx12 | Snx1 | 4.37E-31 | 0.758893336 | 0.486 | 0.285 | 9.92E-27 | OPC |
| Adgrl31 | Adgrl3 | 2.39E-30 | 0.472356641 | 0.983 | 0.892 | 5.42E-26 | OPC |
| Cuedc12 | Cuedc1 | 3.07E-30 | 0.639409345 | 0.433 | 0.215 | 6.97E-26 | OPC |
| Lifr | Lifr | 6.27E-30 | 0.485132655 | 0.341 | 0.146 | 1.42E-25 | OPC |
| Shroom41 | Shroom4 | 7.02E-30 | 0.512638455 | 0.25 | 0.089 | 1.59E-25 | OPC |
| Serinc51 | Serinc5 | 1.41E-29 | 0.749657301 | 0.495 | 0.299 | 3.21E-25 | OPC |
| Soga11 | Soga1 | 1.46E-29 | 0.751949934 | 0.409 | 0.206 | 3.31E-25 | OPC |
| Scfd2 | Scfd2 | 3.82E-29 | 0.901708952 | 0.596 | 0.449 | 8.67E-25 | OPC |
| Parp81 | Parp8 | 4.65E-29 | 0.599114935 | 0.56 | 0.351 | 1.06E-24 | OPC |
| Gab21 | Gab2 | 6.09E-29 | 0.679062949 | 0.642 | 0.462 | 1.38E-24 | OPC |
| Pcmtd2 | Pcmtd2 | 1.22E-28 | 0.790238791 | 0.526 | 0.357 | 2.78E-24 | OPC |
| Srgap1 | Srgap1 | 2.73E-28 | 0.766897082 | 0.757 | 0.614 | 6.20E-24 | OPC |
| Tmtc22 | Tmtc2 | 3.13E-28 | 0.562759107 | 0.702 | 0.508 | 7.12E-24 | OPC |
| Sorcs12 | Sorcs1 | 1.22E-27 | 0.492874962 | 0.911 | 0.727 | 2.78E-23 | OPC |
| Golim4 | Golim4 | 1.34E-27 | 0.654802731 | 0.303 | 0.132 | 3.05E-23 | OPC |
| Sulf1 | Sulf1 | 3.07E-27 | 0.634083814 | 0.284 | 0.12 | 6.97E-23 | OPC |
| Lrp11 | Lrp1 | 3.44E-27 | 0.701363626 | 0.548 | 0.38 | 7.81E-23 | OPC |
| Amz1 | Amz1 | 3.45E-27 | 0.633560008 | 0.288 | 0.13 | 7.83E-23 | OPC |
| Ddah11 | Ddah1 | 7.52E-27 | 0.488812431 | 0.385 | 0.184 | 1.71E-22 | OPC |
| Gm383041 | Gm38304 | 8.55E-27 | 0.76239407 | 0.433 | 0.241 | 1.94E-22 | OPC |
| Map21 | Map2 | 8.62E-27 | 0.464403867 | 0.938 | 0.835 | 1.96E-22 | OPC |
| Gria41 | Gria4 | 1.05E-26 | 0.514583066 | 0.916 | 0.771 | 2.38E-22 | OPC |
| Etv62 | Etv6 | 1.40E-26 | 1.07526468 | 0.502 | 0.321 | 3.17E-22 | OPC |
| Mtmr10 | Mtmr10 | 2.87E-26 | 0.472677735 | 0.288 | 0.121 | 6.51E-22 | OPC |
| Ntm1 | Ntm | 2.91E-26 | 0.297255291 | 0.916 | 0.779 | 6.61E-22 | OPC |
| Alk1 | Alk | 5.11E-26 | 0.440012202 | 0.433 | 0.213 | 1.16E-21 | OPC |
| Satb1 | Satb1 | 6.45E-26 | 0.501317988 | 0.31 | 0.137 | 1.47E-21 | OPC |
| Nectin3 | Nectin3 | 6.73E-26 | 0.484710219 | 0.257 | 0.101 | 1.53E-21 | OPC |
| Kif21b1 | Kif21b | 8.11E-26 | 0.522461351 | 0.305 | 0.138 | 1.84E-21 | OPC |
| Abhd17b1 | Abhd17b | 1.60E-25 | 0.575670065 | 0.596 | 0.407 | 3.62E-21 | OPC |
| Ptpn41 | Ptpn4 | 1.76E-25 | 0.65136676 | 0.733 | 0.614 | 3.99E-21 | OPC |
| Etv5 | Etv5 | 1.95E-25 | 0.68525829 | 0.394 | 0.215 | 4.42E-21 | OPC |
| Arhgef10l1 | Arhgef10l | 2.56E-25 | 0.71405905 | 0.399 | 0.224 | 5.82E-21 | OPC |
| Sirt21 | Sirt2 | 4.80E-25 | 1.147250399 | 0.416 | 0.253 | 1.09E-20 | OPC |
| Ctnnd21 | Ctnnd2 | 1.78E-24 | 0.398017909 | 0.94 | 0.879 | 4.05E-20 | OPC |
| 4430402I18Rik | 4430402I18Rik | 2.09E-24 | 0.863628252 | 0.421 | 0.265 | 4.75E-20 | OPC |
| Sobp | Sobp | 2.88E-24 | 0.64088926 | 0.567 | 0.379 | 6.54E-20 | OPC |
| Elavl4 | Elavl4 | 3.48E-24 | 0.525571444 | 0.368 | 0.182 | 7.91E-20 | OPC |
| Mtss12 | Mtss1 | 4.31E-24 | 0.520015844 | 0.474 | 0.267 | 9.80E-20 | OPC |
| Slc22a231 | Slc22a23 | 1.27E-23 | 0.845609247 | 0.738 | 0.629 | 2.87E-19 | OPC |
| Chl11 | Chl1 | 1.34E-23 | 0.944562538 | 0.534 | 0.401 | 3.03E-19 | OPC |
| St6gal13 | St6gal1 | 2.31E-23 | 0.385752214 | 0.454 | 0.226 | 5.25E-19 | OPC |
| Lrp1b2 | Lrp1b | 2.54E-23 | 0.393724023 | 0.993 | 0.938 | 5.78E-19 | OPC |
| Susd41 | Susd4 | 4.45E-23 | 0.785741747 | 0.55 | 0.423 | 1.01E-18 | OPC |
| Fip1l1 | Fip1l1 | 5.63E-23 | 0.694658874 | 0.51 | 0.36 | 1.28E-18 | OPC |
| Dlc11 | Dlc1 | 1.10E-22 | 0.571827321 | 0.44 | 0.269 | 2.50E-18 | OPC |
| Cntn41 | Cntn4 | 1.68E-22 | 0.50164469 | 0.875 | 0.674 | 3.81E-18 | OPC |
| Cadm22 | Cadm2 | 1.94E-22 | 0.54784437 | 1 | 0.969 | 4.41E-18 | OPC |
| Marcks2 | Marcks | 2.46E-22 | 0.50981122 | 0.438 | 0.257 | 5.59E-18 | OPC |
| E130308A19Rik1 | E130308A19Rik | 2.81E-22 | 0.642831451 | 0.524 | 0.351 | 6.39E-18 | OPC |
| Elovl61 | Elovl6 | 3.08E-22 | 0.720760923 | 0.519 | 0.371 | 7.00E-18 | OPC |
| Cobl1 | Cobl | 3.86E-22 | 0.712614981 | 0.635 | 0.501 | 8.77E-18 | OPC |
| Tmem132b1 | Tmem132b | 4.32E-22 | 0.592728633 | 0.817 | 0.675 | 9.80E-18 | OPC |
| Lpp2 | Lpp | 5.29E-22 | 0.542316018 | 0.553 | 0.371 | 1.20E-17 | OPC |
| Pip5k1b | Pip5k1b | 6.25E-22 | 0.587798033 | 0.322 | 0.161 | 1.42E-17 | OPC |
| Grk5 | Grk5 | 6.31E-22 | 0.624122787 | 0.433 | 0.267 | 1.43E-17 | OPC |
| Adcy8 | Adcy8 | 6.31E-22 | 0.450452363 | 0.257 | 0.108 | 1.43E-17 | OPC |
| Apba21 | Apba2 | 9.07E-22 | 0.649023195 | 0.611 | 0.477 | 2.06E-17 | OPC |
| Arhgef11 | Arhgef11 | 1.73E-21 | 0.545291766 | 0.57 | 0.411 | 3.94E-17 | OPC |
| Serpine21 | Serpine2 | 2.55E-21 | 0.615637044 | 0.637 | 0.503 | 5.78E-17 | OPC |
| Rapgef11 | Rapgef1 | 2.68E-21 | 1.009189023 | 0.548 | 0.444 | 6.08E-17 | OPC |
| Shisa41 | Shisa4 | 3.06E-21 | 0.461024958 | 0.31 | 0.143 | 6.94E-17 | OPC |
| Polg | Polg | 4.71E-21 | 0.591633371 | 0.272 | 0.13 | 1.07E-16 | OPC |
| Cadps2 | Cadps2 | 9.56E-21 | 0.298781901 | 0.298 | 0.137 | 2.17E-16 | OPC |
| Acap3 | Acap3 | 1.41E-20 | 0.528512907 | 0.286 | 0.145 | 3.20E-16 | OPC |
| Mpdz | Mpdz | 2.02E-20 | 0.38451328 | 0.363 | 0.187 | 4.59E-16 | OPC |
| Pik3r13 | Pik3r1 | 2.30E-20 | 0.517545647 | 0.596 | 0.441 | 5.23E-16 | OPC |
| Gm480911 | Gm48091 | 2.62E-20 | 0.67186832 | 0.382 | 0.231 | 5.94E-16 | OPC |
| Asap12 | Asap1 | 3.45E-20 | 0.537118242 | 0.728 | 0.632 | 7.85E-16 | OPC |
| Fam222b1 | Fam222b | 4.14E-20 | 0.658561462 | 0.555 | 0.43 | 9.41E-16 | OPC |
| Ube2e21 | Ube2e2 | 5.05E-20 | 0.481674664 | 0.894 | 0.826 | 1.15E-15 | OPC |
| 9530059O14Rik1 | 9530059O14Rik | 6.00E-20 | 0.515531333 | 0.3 | 0.625 | 1.36E-15 | OPC |
| Abca12 | Abca1 | 2.11E-19 | 0.276506446 | 0.353 | 0.17 | 4.80E-15 | OPC |
| Mdga21 | Mdga2 | 2.25E-19 | 0.30537164 | 1 | 0.942 | 5.11E-15 | OPC |
| Snx9 | Snx9 | 2.61E-19 | 0.472505696 | 0.281 | 0.138 | 5.92E-15 | OPC |
| Gm269361 | Gm26936 | 2.66E-19 | 0.338819114 | 0.327 | 0.163 | 6.04E-15 | OPC |
| Lrrn11 | Lrrn1 | 3.88E-19 | 0.516098221 | 0.332 | 0.176 | 8.80E-15 | OPC |
| Samd41 | Samd4 | 4.16E-19 | 0.726607204 | 0.502 | 0.355 | 9.46E-15 | OPC |
| Zdhhc21 | Zdhhc2 | 4.19E-19 | 0.585837944 | 0.541 | 0.403 | 9.53E-15 | OPC |
| Tcf121 | Tcf12 | 4.48E-19 | 0.372367983 | 0.865 | 0.85 | 1.02E-14 | OPC |
| Foxn33 | Foxn3 | 4.80E-19 | 0.345058475 | 0.724 | 0.552 | 1.09E-14 | OPC |
| D630045J12Rik1 | D630045J12Rik | 1.04E-18 | 0.915229608 | 0.5 | 0.4 | 2.35E-14 | OPC |
| Tmco3 | Tmco3 | 1.09E-18 | 0.569258074 | 0.296 | 0.157 | 2.47E-14 | OPC |
| Rimklb1 | Rimklb | 1.55E-18 | 0.443265062 | 0.305 | 0.159 | 3.52E-14 | OPC |
| Pcdh171 | Pcdh17 | 1.61E-18 | 0.62745618 | 0.721 | 0.618 | 3.65E-14 | OPC |
| Ncam12 | Ncam1 | 2.68E-18 | 0.447531189 | 0.938 | 0.917 | 6.09E-14 | OPC |
| Itgav1 | Itgav | 2.71E-18 | 0.58241067 | 0.495 | 0.345 | 6.15E-14 | OPC |
| Fhit1 | Fhit | 2.93E-18 | 0.740558181 | 0.666 | 0.565 | 6.65E-14 | OPC |
| Neo11 | Neo1 | 4.21E-18 | 0.47556379 | 0.68 | 0.575 | 9.56E-14 | OPC |
| Ctnna21 | Ctnna2 | 6.01E-18 | 0.297717163 | 0.966 | 0.924 | 1.37E-13 | OPC |
| Pdzrn41 | Pdzrn4 | 7.13E-18 | 0.365930364 | 0.57 | 0.386 | 1.62E-13 | OPC |
| Fam196a | Fam196a | 8.52E-18 | 0.451374478 | 0.257 | 0.124 | 1.94E-13 | OPC |
| Clip2 | Clip2 | 1.08E-17 | 0.528270601 | 0.358 | 0.21 | 2.45E-13 | OPC |
| Car10 | Car10 | 1.12E-17 | 0.444422173 | 0.332 | 0.175 | 2.55E-13 | OPC |
| Jam31 | Jam3 | 1.87E-17 | 0.467812677 | 0.433 | 0.273 | 4.24E-13 | OPC |
| C530008M17Rik1 | C530008M17Rik | 2.91E-17 | 0.471262509 | 0.457 | 0.295 | 6.61E-13 | OPC |
| Nol41 | Nol4 | 2.97E-17 | 0.318196693 | 0.692 | 0.614 | 6.74E-13 | OPC |
| Nek71 | Nek7 | 3.24E-17 | 0.274950852 | 0.337 | 0.174 | 7.35E-13 | OPC |
| Gpld11 | Gpld1 | 3.92E-17 | 0.486915569 | 0.264 | 0.134 | 8.91E-13 | OPC |
| Ppm1l | Ppm1l | 4.65E-17 | 0.619742482 | 0.526 | 0.385 | 1.06E-12 | OPC |
| Enah1 | Enah | 1.55E-16 | 0.490451225 | 0.719 | 0.627 | 3.53E-12 | OPC |
| Myo161 | Myo16 | 2.41E-16 | 0.595990198 | 0.493 | 0.362 | 5.48E-12 | OPC |
| Bend7 | Bend7 | 2.42E-16 | 0.551557101 | 0.252 | 0.133 | 5.49E-12 | OPC |
| Dock41 | Dock4 | 2.49E-16 | 0.78104209 | 0.904 | 0.846 | 5.65E-12 | OPC |
| Kcnj31 | Kcnj3 | 2.98E-16 | 0.565131172 | 0.425 | 0.275 | 6.77E-12 | OPC |
| Cdk5rap21 | Cdk5rap2 | 4.65E-16 | 0.482498671 | 0.353 | 0.206 | 1.06E-11 | OPC |
| Arhgap42 | Arhgap42 | 4.79E-16 | 0.382433583 | 0.252 | 0.125 | 1.09E-11 | OPC |
| Etv1 | Etv1 | 5.44E-16 | 0.467486374 | 0.365 | 0.22 | 1.24E-11 | OPC |
| Fry1 | Fry | 6.82E-16 | 0.353375 | 0.904 | 0.776 | 1.55E-11 | OPC |
| Otud7b1 | Otud7b | 7.52E-16 | 0.351867967 | 0.522 | 0.363 | 1.71E-11 | OPC |
| Hnrnpa2b13 | Hnrnpa2b1 | 1.63E-15 | 0.405485803 | 0.688 | 0.596 | 3.69E-11 | OPC |
| Gm21641 | Gm2164 | 1.80E-15 | 0.609657066 | 0.584 | 0.436 | 4.10E-11 | OPC |
| Gm130521 | Gm13052 | 2.38E-15 | 0.926436056 | 0.505 | 0.408 | 5.40E-11 | OPC |
| Naaladl21 | Naaladl2 | 3.39E-15 | 0.385939137 | 0.721 | 0.605 | 7.71E-11 | OPC |
| Prdm5 | Prdm5 | 4.19E-15 | 0.411774021 | 0.276 | 0.147 | 9.51E-11 | OPC |
| Grik31 | Grik3 | 8.40E-15 | 0.432858644 | 0.474 | 0.313 | 1.91E-10 | OPC |
| Klhl32 | Klhl32 | 9.25E-15 | 0.470902145 | 0.459 | 0.315 | 2.10E-10 | OPC |
| Epha51 | Epha5 | 9.36E-15 | 0.37879809 | 0.74 | 0.62 | 2.13E-10 | OPC |
| Ptprm1 | Ptprm | 1.43E-14 | 0.294098825 | 0.661 | 0.474 | 3.24E-10 | OPC |
| Lrch32 | Lrch3 | 1.46E-14 | 0.614378453 | 0.599 | 0.524 | 3.31E-10 | OPC |
| Ss18 | Ss18 | 1.48E-14 | 0.382268196 | 0.286 | 0.157 | 3.36E-10 | OPC |
| Psd32 | Psd3 | 1.60E-14 | 0.402301247 | 0.793 | 0.744 | 3.63E-10 | OPC |
| Igsf21 | Igsf21 | 2.63E-14 | 0.508616688 | 0.322 | 0.199 | 5.97E-10 | OPC |
| Ext11 | Ext1 | 5.98E-14 | 0.363001754 | 0.8 | 0.733 | 1.36E-09 | OPC |
| Dst2 | Dst | 8.87E-14 | 0.319649722 | 0.87 | 0.832 | 2.01E-09 | OPC |
| Oxr12 | Oxr1 | 1.06E-13 | 0.278254063 | 0.743 | 0.611 | 2.41E-09 | OPC |
| Ranbp9 | Ranbp9 | 1.08E-13 | 0.562400224 | 0.572 | 0.492 | 2.44E-09 | OPC |
| Ccdc88a2 | Ccdc88a | 1.61E-13 | 0.331777572 | 0.837 | 0.813 | 3.65E-09 | OPC |
| Ldlrad31 | Ldlrad3 | 2.82E-13 | 0.374144783 | 0.317 | 0.184 | 6.41E-09 | OPC |
| Cacng7 | Cacng7 | 4.78E-13 | 0.485829535 | 0.325 | 0.209 | 1.09E-08 | OPC |
| Ddhd11 | Ddhd1 | 5.44E-13 | 0.403168623 | 0.55 | 0.449 | 1.24E-08 | OPC |
| Zfp827 | Zfp827 | 5.95E-13 | 0.54845587 | 0.529 | 0.453 | 1.35E-08 | OPC |
| Antxr1 | Antxr1 | 6.84E-13 | 0.461048508 | 0.31 | 0.189 | 1.55E-08 | OPC |
| 4930509J09Rik | 4930509J09Rik | 1.45E-12 | 0.58448572 | 0.262 | 0.157 | 3.29E-08 | OPC |
| Eif4g3 | Eif4g3 | 1.94E-12 | 0.34583254 | 0.764 | 0.7 | 4.40E-08 | OPC |
| Trim241 | Trim24 | 2.14E-12 | 0.427281192 | 0.411 | 0.291 | 4.85E-08 | OPC |
| Mthfd1l | Mthfd1l | 2.24E-12 | 0.483888147 | 0.325 | 0.208 | 5.09E-08 | OPC |
| Asap21 | Asap2 | 2.29E-12 | 0.445559285 | 0.353 | 0.236 | 5.19E-08 | OPC |
| Igsf9b1 | Igsf9b | 2.36E-12 | 0.648688641 | 0.38 | 0.29 | 5.36E-08 | OPC |
| Csnk2a2 | Csnk2a2 | 2.57E-12 | 0.596971623 | 0.411 | 0.314 | 5.83E-08 | OPC |
| Ldlrad41 | Ldlrad4 | 2.79E-12 | 0.296489202 | 0.748 | 0.63 | 6.34E-08 | OPC |
| Cadps1 | Cadps | 3.35E-12 | 0.34945199 | 0.834 | 0.719 | 7.61E-08 | OPC |
| Gmds | Gmds | 3.45E-12 | 0.452861051 | 0.637 | 0.556 | 7.84E-08 | OPC |
| Mmd21 | Mmd2 | 4.38E-12 | 0.29663571 | 0.305 | 0.182 | 9.95E-08 | OPC |
| Lamc1 | Lamc1 | 4.41E-12 | 0.534346064 | 0.411 | 0.311 | 1.00E-07 | OPC |
| Mitf2 | Mitf | 5.17E-12 | 0.707434621 | 0.452 | 0.344 | 1.18E-07 | OPC |
| Jmjd1c1 | Jmjd1c | 5.67E-12 | 0.398741765 | 0.791 | 0.779 | 1.29E-07 | OPC |
| Ccser2 | Ccser2 | 6.09E-12 | 0.720936067 | 0.469 | 0.402 | 1.38E-07 | OPC |
| Tgfa | Tgfa | 8.83E-12 | 0.504382613 | 0.474 | 0.375 | 2.01E-07 | OPC |
| Ptprs | Ptprs | 1.18E-11 | 0.351601786 | 0.673 | 0.6 | 2.68E-07 | OPC |
| Cfap20 | Cfap20 | 1.31E-11 | 0.548406752 | 0.341 | 0.237 | 2.98E-07 | OPC |
| Cmtm4 | Cmtm4 | 1.99E-11 | 0.454760965 | 0.255 | 0.152 | 4.52E-07 | OPC |
| Npc1 | Npc1 | 2.30E-11 | 0.356743624 | 0.312 | 0.193 | 5.23E-07 | OPC |
| Camsap2 | Camsap2 | 2.60E-11 | 0.621982198 | 0.483 | 0.412 | 5.90E-07 | OPC |
| Grb141 | Grb14 | 3.33E-11 | 0.25080932 | 0.368 | 0.233 | 7.55E-07 | OPC |
| Stk32 | Stk3 | 3.99E-11 | 0.289770628 | 0.399 | 0.27 | 9.05E-07 | OPC |
| Mgat5b1 | Mgat5b | 1.09E-10 | 0.657211342 | 0.413 | 0.339 | 2.47E-06 | OPC |
| Ophn11 | Ophn1 | 1.13E-10 | 0.323771961 | 0.57 | 0.494 | 2.57E-06 | OPC |
| Rgs72 | Rgs7 | 1.14E-10 | 0.366881485 | 0.808 | 0.726 | 2.60E-06 | OPC |
| Fam19a5 | Fam19a5 | 1.16E-10 | 0.500891864 | 0.608 | 0.577 | 2.63E-06 | OPC |
| Nnat1 | Nnat | 1.66E-10 | 0.317257998 | 0.56 | 0.464 | 3.76E-06 | OPC |
| Arsb1 | Arsb | 1.72E-10 | 0.639384979 | 0.51 | 0.446 | 3.92E-06 | OPC |
| Dzip1 | Dzip1 | 1.98E-10 | 0.430652524 | 0.303 | 0.203 | 4.49E-06 | OPC |
| Tpm1 | Tpm1 | 2.69E-10 | 0.584556636 | 0.425 | 0.344 | 6.12E-06 | OPC |
| Rims11 | Rims1 | 3.20E-10 | 0.314437903 | 0.829 | 0.727 | 7.26E-06 | OPC |
| Myo101 | Myo10 | 3.74E-10 | 0.340184978 | 0.293 | 0.185 | 8.49E-06 | OPC |
| Snap911 | Snap91 | 4.01E-10 | 0.412857031 | 0.663 | 0.6 | 9.11E-06 | OPC |
| Lims12 | Lims1 | 4.19E-10 | 0.293870523 | 0.493 | 0.374 | 9.52E-06 | OPC |
| St8sia1 | St8sia1 | 4.38E-10 | 0.423505948 | 0.252 | 0.16 | 9.95E-06 | OPC |
| Zswim51 | Zswim5 | 5.16E-10 | 0.538941468 | 0.553 | 0.49 | 1.17E-05 | OPC |
| 8-Sep | 8-Sep | 5.21E-10 | 0.445266793 | 0.344 | 0.248 | 1.18E-05 | OPC |
| Tenm11 | Tenm1 | 5.82E-10 | 0.283195385 | 0.683 | 0.595 | 1.32E-05 | OPC |
| Ankrd61 | Ankrd6 | 6.65E-10 | 0.427131022 | 0.483 | 0.405 | 1.51E-05 | OPC |
| Zdhhc141 | Zdhhc14 | 7.24E-10 | 0.544138721 | 0.779 | 0.74 | 1.64E-05 | OPC |
| Cpeb21 | Cpeb2 | 8.87E-10 | 0.323164262 | 0.55 | 0.469 | 2.02E-05 | OPC |
| Iffo11 | Iffo1 | 1.02E-09 | 0.390437184 | 0.3 | 0.2 | 2.31E-05 | OPC |
| Rasa21 | Rasa2 | 1.03E-09 | 0.420585651 | 0.452 | 0.366 | 2.33E-05 | OPC |
| Fgf121 | Fgf12 | 1.56E-09 | 0.368068566 | 0.695 | 0.65 | 3.55E-05 | OPC |
| Raph1 | Raph1 | 1.63E-09 | 0.470896809 | 0.459 | 0.382 | 3.69E-05 | OPC |
| Gm111491 | Gm11149 | 2.51E-09 | 0.373642499 | 0.512 | 0.422 | 5.71E-05 | OPC |
| Pknox21 | Pknox2 | 4.62E-09 | 0.548778415 | 0.493 | 0.438 | 0.000104829 | OPC |
| Rnf1802 | Rnf180 | 5.02E-09 | 0.480091945 | 0.469 | 0.402 | 0.000114132 | OPC |
| Foxn2 | Foxn2 | 6.62E-09 | 0.376698853 | 0.317 | 0.226 | 0.000150344 | OPC |
| Cmip | Cmip | 7.28E-09 | 0.400381192 | 0.62 | 0.579 | 0.000165411 | OPC |
| Ccser11 | Ccser1 | 8.27E-09 | 0.250417892 | 0.909 | 0.818 | 0.000187769 | OPC |
| Papss11 | Papss1 | 8.81E-09 | 0.376812144 | 0.377 | 0.288 | 0.00019999 | OPC |
| Lrrfip11 | Lrrfip1 | 9.68E-09 | 0.447811748 | 0.495 | 0.443 | 0.00021987 | OPC |
| Nrcam1 | Nrcam | 1.05E-08 | 0.396431892 | 0.748 | 0.698 | 0.000238187 | OPC |
| Rsu11 | Rsu1 | 1.09E-08 | 0.397489376 | 0.351 | 0.257 | 0.000247865 | OPC |
| Nlgn3 | Nlgn3 | 1.16E-08 | 0.469694269 | 0.31 | 0.226 | 0.000263639 | OPC |
| Kcnt21 | Kcnt2 | 1.24E-08 | 0.313977586 | 0.361 | 0.254 | 0.000281734 | OPC |
| Rab101 | Rab10 | 1.33E-08 | 0.30862897 | 0.608 | 0.58 | 0.00030292 | OPC |
| Uggt21 | Uggt2 | 1.37E-08 | 0.419823038 | 0.481 | 0.423 | 0.000312212 | OPC |
| Slc44a51 | Slc44a5 | 1.63E-08 | 0.419865808 | 0.38 | 0.288 | 0.000370396 | OPC |
| Gabra31 | Gabra3 | 1.69E-08 | 0.422436472 | 0.269 | 0.178 | 0.000384507 | OPC |
| Tnpo1 | Tnpo1 | 1.84E-08 | 0.433970342 | 0.594 | 0.566 | 0.000418601 | OPC |
| Fat1 | Fat1 | 1.88E-08 | 0.327104428 | 0.274 | 0.18 | 0.000426186 | OPC |
| Srsf6 | Srsf6 | 2.13E-08 | 0.372538293 | 0.337 | 0.248 | 0.000482949 | OPC |
| Tbl1xr12 | Tbl1xr1 | 2.28E-08 | 0.33457798 | 0.514 | 0.45 | 0.000518153 | OPC |
| Caskin11 | Caskin1 | 2.39E-08 | 0.36822348 | 0.293 | 0.205 | 0.00054253 | OPC |
| Nalcn1 | Nalcn | 2.48E-08 | 0.315600718 | 0.81 | 0.709 | 0.000562971 | OPC |
| Abhd121 | Abhd12 | 2.72E-08 | 0.304921211 | 0.488 | 0.418 | 0.000617589 | OPC |
| Gnb41 | Gnb4 | 2.90E-08 | 0.517556957 | 0.317 | 0.236 | 0.000658137 | OPC |
| Rab8b1 | Rab8b | 3.66E-08 | 0.325838673 | 0.317 | 0.224 | 0.000831397 | OPC |
| Rspry1 | Rspry1 | 6.05E-08 | 0.411503082 | 0.454 | 0.387 | 0.001374893 | OPC |
| Epb41l21 | Epb41l2 | 8.04E-08 | 0.834800332 | 0.373 | 0.288 | 0.001826964 | OPC |
| Ppfia21 | Ppfia2 | 8.60E-08 | 0.345947218 | 0.796 | 0.733 | 0.001952805 | OPC |
| Zfand63 | Zfand6 | 1.09E-07 | 0.291005079 | 0.392 | 0.296 | 0.002472384 | OPC |
| Apba11 | Apba1 | 1.15E-07 | 0.376702963 | 0.623 | 0.588 | 0.002603386 | OPC |
| 2610008E11Rik | 2610008E11Rik | 1.24E-07 | 0.404773046 | 0.325 | 0.245 | 0.002808412 | OPC |
| Exoc4 | Exoc4 | 1.24E-07 | 0.289252237 | 0.875 | 0.864 | 0.002812816 | OPC |
| Ppp1r211 | Ppp1r21 | 1.24E-07 | 0.263849043 | 0.421 | 0.336 | 0.002827646 | OPC |
| Frmd6 | Frmd6 | 1.38E-07 | 0.39527726 | 0.325 | 0.244 | 0.003142468 | OPC |
| Rab11a | Rab11a | 1.83E-07 | 0.334293575 | 0.264 | 0.183 | 0.004151159 | OPC |
| Tmem167 | Tmem167 | 2.33E-07 | 0.429748593 | 0.45 | 0.391 | 0.005295827 | OPC |
| Rnf2161 | Rnf216 | 2.63E-07 | 0.292536493 | 0.582 | 0.532 | 0.005982722 | OPC |
| Srek1 | Srek1 | 3.51E-07 | 0.285450871 | 0.683 | 0.666 | 0.007981872 | OPC |
| Kif3a1 | Kif3a | 3.66E-07 | 0.402207643 | 0.462 | 0.413 | 0.008310722 | OPC |
| Tra2a1 | Tra2a | 4.24E-07 | 0.25211496 | 0.774 | 0.762 | 0.00962522 | OPC |
| Fryl1 | Fryl | 4.71E-07 | 0.311142833 | 0.63 | 0.613 | 0.010708523 | OPC |
| Mapk9 | Mapk9 | 5.41E-07 | 0.341964027 | 0.351 | 0.278 | 0.012289895 | OPC |
| Elavl11 | Elavl1 | 5.99E-07 | 0.322380254 | 0.447 | 0.383 | 0.013607608 | OPC |
| Akt31 | Akt3 | 6.02E-07 | 0.295939772 | 0.81 | 0.814 | 0.01367402 | OPC |
| Asxl31 | Asxl3 | 6.98E-07 | 0.312091861 | 0.308 | 0.225 | 0.01584335 | OPC |
| Cep681 | Cep68 | 8.31E-07 | 0.269669873 | 0.267 | 0.185 | 0.018872538 | OPC |
| Lrp61 | Lrp6 | 9.13E-07 | 0.362483998 | 0.524 | 0.492 | 0.020748043 | OPC |
| Prr161 | Prr16 | 9.46E-07 | 0.393379502 | 0.416 | 0.34 | 0.021491454 | OPC |
| E130307A14Rik | E130307A14Rik | 9.49E-07 | 0.375196742 | 0.611 | 0.59 | 0.021560834 | OPC |
| Sptlc2 | Sptlc2 | 1.24E-06 | 0.326901942 | 0.334 | 0.258 | 0.028194046 | OPC |
| Nlgn2 | Nlgn2 | 1.26E-06 | 0.343370881 | 0.26 | 0.187 | 0.028514723 | OPC |
| Khdrbs12 | Khdrbs1 | 1.42E-06 | 0.282781143 | 0.45 | 0.387 | 0.032343804 | OPC |
| Gtf2i1 | Gtf2i | 1.61E-06 | 0.291712142 | 0.615 | 0.605 | 0.03657438 | OPC |
| Galnt161 | Galnt16 | 1.72E-06 | 0.374853547 | 0.409 | 0.333 | 0.039087092 | OPC |
| Chpt11 | Chpt1 | 1.78E-06 | 0.369843254 | 0.409 | 0.345 | 0.040335736 | OPC |
| Mgll1 | Mgll | 2.25E-06 | 0.285742335 | 0.454 | 0.392 | 0.051202548 | OPC |
| Dennd5a1 | Dennd5a | 2.28E-06 | 0.254425134 | 0.541 | 0.501 | 0.051743181 | OPC |
| Atg16l21 | Atg16l2 | 2.36E-06 | 0.42091239 | 0.317 | 0.251 | 0.053555634 | OPC |
| Ispd1 | Ispd | 2.67E-06 | 0.303851743 | 0.363 | 0.283 | 0.060638172 | OPC |
| Usp16 | Usp16 | 2.99E-06 | 0.413667798 | 0.315 | 0.249 | 0.067814726 | OPC |
| Gfod1 | Gfod1 | 3.18E-06 | 0.469055963 | 0.411 | 0.373 | 0.072327146 | OPC |
| Amph1 | Amph | 3.45E-06 | 0.3045999 | 0.62 | 0.584 | 0.078257586 | OPC |
| Shc32 | Shc3 | 3.56E-06 | 0.408463734 | 0.476 | 0.442 | 0.080967815 | OPC |
| Tbc1d23 | Tbc1d23 | 4.58E-06 | 0.31857595 | 0.457 | 0.413 | 0.1040472 | OPC |
| Peli11 | Peli1 | 5.22E-06 | 0.507821071 | 0.51 | 0.484 | 0.118457889 | OPC |
| Spred11 | Spred1 | 5.31E-06 | 0.314088576 | 0.601 | 0.571 | 0.120512149 | OPC |
| Taf15 | Taf15 | 5.46E-06 | 0.299219537 | 0.541 | 0.513 | 0.124009083 | OPC |
| Kazn1 | Kazn | 5.47E-06 | 0.530007667 | 0.469 | 0.436 | 0.124282611 | OPC |
| Lrrc4b | Lrrc4b | 5.77E-06 | 0.287565056 | 0.406 | 0.344 | 0.130958066 | OPC |
| Prune2 | Prune2 | 8.74E-06 | 0.484548776 | 0.31 | 0.254 | 0.198615489 | OPC |
| B3gat1 | B3gat1 | 8.91E-06 | 0.33152396 | 0.276 | 0.212 | 0.20229428 | OPC |
| Jmy | Jmy | 9.03E-06 | 0.470670028 | 0.322 | 0.269 | 0.205034648 | OPC |
| Cpsf6 | Cpsf6 | 9.08E-06 | 0.267844423 | 0.541 | 0.5 | 0.206331444 | OPC |
| 1110004F10Rik | 1110004F10Rik | 9.20E-06 | 0.303879323 | 0.31 | 0.24 | 0.209017399 | OPC |
| Pkd21 | Pkd2 | 1.14E-05 | 0.27003885 | 0.409 | 0.348 | 0.258995789 | OPC |
| 4930445B16Rik1 | 4930445B16Rik | 1.38E-05 | 0.44757573 | 0.284 | 0.226 | 0.313240982 | OPC |
| Kcnh51 | Kcnh5 | 1.47E-05 | 0.445082164 | 0.385 | 0.341 | 0.333851198 | OPC |
| Gm47271 | Gm47271 | 1.68E-05 | 0.303827753 | 0.262 | 0.196 | 0.381327589 | OPC |
| Nim1k1 | Nim1k | 1.77E-05 | 0.257854518 | 0.269 | 0.2 | 0.402695465 | OPC |
| Zfp516 | Zfp516 | 2.00E-05 | 0.314275766 | 0.274 | 0.21 | 0.453708981 | OPC |
| Mcu | Mcu | 2.01E-05 | 0.31197002 | 0.562 | 0.54 | 0.457023405 | OPC |
| 4930517O19Rik1 | 4930517O19Rik | 2.15E-05 | 0.388572542 | 0.32 | 0.261 | 0.48825689 | OPC |
| Ago3 | Ago3 | 2.56E-05 | 0.474604252 | 0.603 | 0.629 | 0.582297883 | OPC |
| Lrrc8d1 | Lrrc8d | 2.82E-05 | 0.267502628 | 0.471 | 0.429 | 0.639385869 | OPC |
| Rhobtb3 | Rhobtb3 | 2.94E-05 | 0.258245671 | 0.279 | 0.209 | 0.667426265 | OPC |
| Sfmbt11 | Sfmbt1 | 3.00E-05 | 0.266442942 | 0.394 | 0.336 | 0.680696171 | OPC |
| Gtf2f2 | Gtf2f2 | 3.30E-05 | 0.264712258 | 0.284 | 0.218 | 0.7488857 | OPC |
| Snd1 | Snd1 | 3.37E-05 | 0.2779153 | 0.562 | 0.544 | 0.765811701 | OPC |
| Sema4d2 | Sema4d | 5.95E-05 | 0.975652357 | 0.308 | 0.256 | 1 | OPC |
| Nkain31 | Nkain3 | 7.47E-05 | 0.363126464 | 0.627 | 0.582 | 1 | OPC |
| Top2b | Top2b | 7.53E-05 | 0.285495548 | 0.462 | 0.435 | 1 | OPC |
| Bcl7a | Bcl7a | 7.62E-05 | 0.293343955 | 0.276 | 0.217 | 1 | OPC |
| Hmg20a1 | Hmg20a | 7.85E-05 | 0.336385093 | 0.534 | 0.519 | 1 | OPC |
| Ptbp31 | Ptbp3 | 9.04E-05 | 0.284834696 | 0.291 | 0.227 | 1 | OPC |
| Plekha61 | Plekha6 | 0.000102065 | 0.445627302 | 0.457 | 0.441 | 1 | OPC |
| Syn21 | Syn2 | 0.000147681 | 0.281700274 | 0.69 | 0.668 | 1 | OPC |
| Ppp4r1 | Ppp4r1 | 0.000167528 | 0.268889878 | 0.373 | 0.326 | 1 | OPC |
| Myo5a1 | Myo5a | 0.000203183 | 0.279365054 | 0.685 | 0.679 | 1 | OPC |
| B4galt6 | B4galt6 | 0.000216831 | 0.298686382 | 0.312 | 0.266 | 1 | OPC |
| Osbpl101 | Osbpl10 | 0.000223611 | 0.347704961 | 0.312 | 0.269 | 1 | OPC |
| Ank11 | Ank1 | 0.000263877 | 0.313285056 | 0.26 | 0.207 | 1 | OPC |
| Spats2 | Spats2 | 0.000277308 | 0.372472094 | 0.329 | 0.293 | 1 | OPC |
| Ppp2r5e | Ppp2r5e | 0.00028402 | 0.27435831 | 0.548 | 0.556 | 1 | OPC |
| Stat31 | Stat3 | 0.000286608 | 0.265016982 | 0.276 | 0.22 | 1 | OPC |
| Cyp7b11 | Cyp7b1 | 0.000305732 | 0.401837956 | 0.356 | 0.314 | 1 | OPC |
| Atcay1 | Atcay | 0.000308162 | 0.371077255 | 0.361 | 0.335 | 1 | OPC |
| Senp61 | Senp6 | 0.000347706 | 0.257253077 | 0.587 | 0.584 | 1 | OPC |
| E2f32 | E2f3 | 0.000363082 | 0.2590092 | 0.305 | 0.259 | 1 | OPC |
| Mast21 | Mast2 | 0.000368252 | 0.324666364 | 0.488 | 0.471 | 1 | OPC |
| Nfasc1 | Nfasc | 0.000452376 | 1.747162515 | 0.603 | 0.651 | 1 | OPC |
| Rictor1 | Rictor | 0.000518 | 0.566586203 | 0.478 | 0.501 | 1 | OPC |
| Xrcc4 | Xrcc4 | 0.000527296 | 0.322100735 | 0.534 | 0.532 | 1 | OPC |
| Zfp3261 | Zfp326 | 0.000571934 | 0.251093104 | 0.305 | 0.253 | 1 | OPC |
| Fut8 | Fut8 | 0.000642104 | 0.264893252 | 0.601 | 0.617 | 1 | OPC |
| Fam135a | Fam135a | 0.000675181 | 0.261163571 | 0.505 | 0.494 | 1 | OPC |
| Msantd2 | Msantd2 | 0.00071144 | 0.255165007 | 0.344 | 0.304 | 1 | OPC |
| Lrfn21 | Lrfn2 | 0.000745612 | 0.332217604 | 0.305 | 0.264 | 1 | OPC |
| Mar-81 | 8-Mar | 0.000824646 | 0.263110782 | 0.25 | 0.197 | 1 | OPC |
| Phyhipl1 | Phyhipl | 0.001130208 | 0.482561978 | 0.385 | 0.363 | 1 | OPC |
| Agfg1 | Agfg1 | 0.001578243 | 0.30883683 | 0.411 | 0.398 | 1 | OPC |
| Cnrip1 | Cnrip1 | 0.00194418 | 0.279522502 | 0.286 | 0.249 | 1 | OPC |
| Gpr451 | Gpr45 | 0.002308377 | 0.375923348 | 0.293 | 0.268 | 1 | OPC |
| Agpat5 | Agpat5 | 0.002323474 | 0.255204324 | 0.32 | 0.29 | 1 | OPC |
| Myef2 | Myef2 | 0.00248791 | 0.258681076 | 0.457 | 0.461 | 1 | OPC |
| Fam189a11 | Fam189a1 | 0.002497784 | 0.251307709 | 0.519 | 0.5 | 1 | OPC |
| Cpne81 | Cpne8 | 0.002596185 | 0.358929915 | 0.334 | 0.311 | 1 | OPC |
| Tacc2 | Tacc2 | 0.002626551 | 0.288450554 | 0.25 | 0.215 | 1 | OPC |
| Slc44a11 | Slc44a1 | 0.002858453 | 0.663402243 | 0.514 | 0.559 | 1 | OPC |
| Ptprr1 | Ptprr | 0.003124975 | 0.35348598 | 0.44 | 0.429 | 1 | OPC |
| Sycp2 | Sycp2 | 0.003153978 | 0.311585152 | 0.262 | 0.229 | 1 | OPC |
| Cntln | Cntln | 0.004054817 | 0.27710714 | 0.435 | 0.423 | 1 | OPC |
| Pkia1 | Pkia | 0.00432177 | 0.330538074 | 0.548 | 0.565 | 1 | OPC |
| Carmil11 | Carmil1 | 0.00513541 | 0.477647234 | 0.464 | 0.466 | 1 | OPC |
| Lrrc41 | Lrrc4 | 0.006391171 | 0.277106507 | 0.399 | 0.396 | 1 | OPC |
| Fam13c2 | Fam13c | 0.008215697 | 0.587714333 | 0.411 | 0.401 | 1 | OPC |
| Cdc42se21 | Cdc42se2 | 0.008345922 | 0.267440734 | 0.478 | 0.494 | 1 | OPC |
| Ranbp17 | Ranbp17 | 0.009560357 | 0.277326312 | 0.462 | 0.458 | 1 | OPC |
| Flt1 | Flt1 | 0 | 4.123211122 | 0.463 | 0.01 | 0 | Endocelia |
| Slco1a4 | Slco1a4 | 0 | 3.905042682 | 0.386 | 0.007 | 0 | Endocelia |
| Mecom | Mecom | 0 | 3.200436121 | 0.333 | 0.005 | 0 | Endocelia |
| Adgrl4 | Adgrl4 | 0 | 3.148861135 | 0.344 | 0.004 | 0 | Endocelia |
| Rgs5 | Rgs5 | 0 | 3.079273261 | 0.396 | 0.021 | 0 | Endocelia |
| Adgrf5 | Adgrf5 | 0 | 2.340305399 | 0.368 | 0.007 | 0 | Endocelia |
| Ly6c1 | Ly6c1 | 0 | 2.321988748 | 0.312 | 0.01 | 0 | Endocelia |
| Cxcl12 | Cxcl12 | 0 | 2.292432644 | 0.281 | 0.007 | 0 | Endocelia |
| Abcb1a | Abcb1a | 0 | 2.290787385 | 0.326 | 0.007 | 0 | Endocelia |
| Igfbp7 | Igfbp7 | 0 | 2.290221098 | 0.442 | 0.017 | 0 | Endocelia |
| Cyyr1 | Cyyr1 | 0 | 2.265196406 | 0.312 | 0.008 | 0 | Endocelia |
| Rbpms | Rbpms | 0 | 2.170920634 | 0.425 | 0.015 | 0 | Endocelia |
| Slc6a20a | Slc6a20a | 0 | 2.033119532 | 0.274 | 0.009 | 0 | Endocelia |
| Cldn5 | Cldn5 | 0 | 2.027184232 | 0.291 | 0.006 | 0 | Endocelia |
| Itga1 | Itga1 | 0 | 1.948422933 | 0.379 | 0.01 | 0 | Endocelia |
| Ly6a | Ly6a | 0 | 1.816074081 | 0.263 | 0.004 | 0 | Endocelia |
| Emcn | Emcn | 0 | 1.788410115 | 0.326 | 0.012 | 0 | Endocelia |
| Eng | Eng | 0 | 1.769489726 | 0.344 | 0.009 | 0 | Endocelia |
| Fzd6 | Fzd6 | 0 | 1.700028049 | 0.386 | 0.016 | 0 | Endocelia |
| Fn1 | Fn1 | 0 | 1.642432332 | 0.284 | 0.005 | 0 | Endocelia |
| Klf2 | Klf2 | 0 | 1.499903608 | 0.267 | 0.003 | 0 | Endocelia |
| Apcdd1 | Apcdd1 | 0 | 1.439606188 | 0.33 | 0.01 | 0 | Endocelia |
| Slc22a8 | Slc22a8 | 0 | 1.378839707 | 0.295 | 0.002 | 0 | Endocelia |
| Adgre5 | Adgre5 | 0 | 1.035022196 | 0.253 | 0.008 | 0 | Endocelia |
| Lef1 | Lef1 | 2.72E-307 | 2.358716611 | 0.393 | 0.022 | 6.17E-303 | Endocelia |
| Arhgap29 | Arhgap29 | 6.77E-296 | 1.957072304 | 0.418 | 0.027 | 1.54E-291 | Endocelia |
| Ets1 | Ets1 | 2.51E-285 | 1.619882408 | 0.333 | 0.016 | 5.69E-281 | Endocelia |
| Cgnl1 | Cgnl1 | 2.53E-271 | 1.668498369 | 0.375 | 0.023 | 5.74E-267 | Endocelia |
| Hmcn1 | Hmcn1 | 1.55E-270 | 2.434190439 | 0.316 | 0.016 | 3.52E-266 | Endocelia |
| Pdgfd | Pdgfd | 8.89E-269 | 2.024646352 | 0.305 | 0.015 | 2.02E-264 | Endocelia |
| Ramp2 | Ramp2 | 9.09E-251 | 1.547107167 | 0.256 | 0.011 | 2.06E-246 | Endocelia |
| Prom1 | Prom1 | 5.22E-250 | 1.898111554 | 0.309 | 0.016 | 1.18E-245 | Endocelia |
| Pecam1 | Pecam1 | 1.42E-210 | 1.417794384 | 0.27 | 0.015 | 3.22E-206 | Endocelia |
| Ptprb | Ptprb | 1.26E-204 | 2.689428231 | 0.344 | 0.027 | 2.86E-200 | Endocelia |
| Epas1 | Epas1 | 7.84E-183 | 2.412929049 | 0.432 | 0.049 | 1.78E-178 | Endocelia |
| Itm2a | Itm2a | 1.06E-178 | 1.784889606 | 0.277 | 0.019 | 2.41E-174 | Endocelia |
| Phldb2 | Phldb2 | 1.33E-175 | 1.883007416 | 0.323 | 0.027 | 3.03E-171 | Endocelia |
| Abcg2 | Abcg2 | 3.47E-175 | 1.842196222 | 0.333 | 0.029 | 7.87E-171 | Endocelia |
| Colec12 | Colec12 | 2.03E-172 | 2.374570246 | 0.298 | 0.024 | 4.62E-168 | Endocelia |
| Itih5 | Itih5 | 2.68E-166 | 1.96417137 | 0.316 | 0.028 | 6.10E-162 | Endocelia |
| Slc2a1 | Slc2a1 | 4.59E-155 | 2.629563905 | 0.421 | 0.055 | 1.04E-150 | Endocelia |
| Sema3c | Sema3c | 1.06E-148 | 2.064854624 | 0.305 | 0.029 | 2.42E-144 | Endocelia |
| Dock6 | Dock6 | 2.06E-130 | 1.490422903 | 0.305 | 0.033 | 4.67E-126 | Endocelia |
| Ahnak | Ahnak | 5.13E-128 | 1.317031615 | 0.263 | 0.025 | 1.17E-123 | Endocelia |
| Slc7a5 | Slc7a5 | 1.44E-127 | 1.525864939 | 0.263 | 0.025 | 3.27E-123 | Endocelia |
| Podxl | Podxl | 5.65E-124 | 1.33629706 | 0.298 | 0.033 | 1.28E-119 | Endocelia |
| Fli11 | Fli1 | 1.55E-116 | 1.78399553 | 0.326 | 0.041 | 3.52E-112 | Endocelia |
| Cobll12 | Cobll1 | 1.86E-112 | 1.740533074 | 0.558 | 0.119 | 4.21E-108 | Endocelia |
| 9530026P05Rik | 9530026P05Rik | 1.27E-108 | 2.003224288 | 0.453 | 0.087 | 2.89E-104 | Endocelia |
| Ebf11 | Ebf1 | 8.04E-107 | 2.945019188 | 0.702 | 0.241 | 1.83E-102 | Endocelia |
| Ccdc1411 | Ccdc141 | 7.00E-104 | 2.347938209 | 0.418 | 0.079 | 1.59E-99 | Endocelia |
| Pdgfrb | Pdgfrb | 4.28E-102 | 1.378859285 | 0.274 | 0.033 | 9.73E-98 | Endocelia |
| Tns1 | Tns1 | 5.53E-99 | 1.643334724 | 0.396 | 0.074 | 1.26E-94 | Endocelia |
| Arhgap312 | Arhgap31 | 6.93E-95 | 1.820458626 | 0.456 | 0.097 | 1.57E-90 | Endocelia |
| Kank3 | Kank3 | 1.29E-94 | 0.941136321 | 0.256 | 0.032 | 2.94E-90 | Endocelia |
| Plscr4 | Plscr4 | 3.72E-90 | 1.028694745 | 0.26 | 0.033 | 8.44E-86 | Endocelia |
| Pltp | Pltp | 2.37E-89 | 1.859592734 | 0.344 | 0.061 | 5.38E-85 | Endocelia |
| Atp10a | Atp10a | 2.18E-86 | 2.304076909 | 0.347 | 0.065 | 4.95E-82 | Endocelia |
| Rhoj | Rhoj | 3.93E-82 | 0.794153912 | 0.253 | 0.034 | 8.92E-78 | Endocelia |
| Tek | Tek | 1.41E-80 | 1.671480813 | 0.333 | 0.063 | 3.20E-76 | Endocelia |
| Heg11 | Heg1 | 1.71E-80 | 1.881322058 | 0.509 | 0.139 | 3.88E-76 | Endocelia |
| Atp13a5 | Atp13a5 | 5.68E-80 | 3.194397606 | 0.298 | 0.051 | 1.29E-75 | Endocelia |
| Cp1 | Cp | 1.06E-75 | 1.293994668 | 0.277 | 0.045 | 2.42E-71 | Endocelia |
| Sparc1 | Sparc | 2.23E-74 | 1.477892699 | 0.333 | 0.065 | 5.06E-70 | Endocelia |
| Wwtr11 | Wwtr1 | 1.26E-71 | 1.473351086 | 0.368 | 0.081 | 2.87E-67 | Endocelia |
| Ltbp4 | Ltbp4 | 4.72E-71 | 1.276193475 | 0.281 | 0.05 | 1.07E-66 | Endocelia |
| Pdgfb | Pdgfb | 2.58E-68 | 1.065136761 | 0.253 | 0.042 | 5.85E-64 | Endocelia |
| Ly6e | Ly6e | 9.61E-67 | 1.598240659 | 0.288 | 0.055 | 2.18E-62 | Endocelia |
| Afap1l1 | Afap1l1 | 2.84E-65 | 0.846988376 | 0.291 | 0.052 | 6.46E-61 | Endocelia |
| Slco1c11 | Slco1c1 | 9.72E-65 | 2.317452176 | 0.372 | 0.093 | 2.21E-60 | Endocelia |
| Tgfbr21 | Tgfbr2 | 1.50E-61 | 0.829523657 | 0.281 | 0.053 | 3.41E-57 | Endocelia |
| Cald12 | Cald1 | 2.52E-59 | 2.127029609 | 0.439 | 0.132 | 5.72E-55 | Endocelia |
| Rasgrp32 | Rasgrp3 | 7.67E-58 | 0.928987963 | 0.33 | 0.072 | 1.74E-53 | Endocelia |
| Utrn1 | Utrn | 3.73E-56 | 2.131036886 | 0.796 | 0.528 | 8.46E-52 | Endocelia |
| Selenop | Selenop | 2.92E-52 | 1.105164178 | 0.288 | 0.065 | 6.64E-48 | Endocelia |
| Map3k20 | Map3k20 | 4.47E-52 | 1.116318961 | 0.295 | 0.07 | 1.01E-47 | Endocelia |
| Sptbn1 | Sptbn1 | 5.19E-52 | 1.609236956 | 0.905 | 0.818 | 1.18E-47 | Endocelia |
| Sema7a | Sema7a | 1.98E-51 | 0.896259048 | 0.26 | 0.055 | 4.50E-47 | Endocelia |
| Ndrg11 | Ndrg1 | 5.79E-49 | 0.958838114 | 0.319 | 0.079 | 1.31E-44 | Endocelia |
| Palmd | Palmd | 9.30E-49 | 1.465083113 | 0.295 | 0.075 | 2.11E-44 | Endocelia |
| Gatm2 | Gatm | 1.75E-46 | 0.928646458 | 0.526 | 0.184 | 3.98E-42 | Endocelia |
| Bsg | Bsg | 3.27E-46 | 2.864944916 | 0.568 | 0.278 | 7.43E-42 | Endocelia |
| St3gal61 | St3gal6 | 9.58E-45 | 1.46511549 | 0.319 | 0.089 | 2.18E-40 | Endocelia |
| Slc7a1 | Slc7a1 | 1.71E-43 | 1.365805917 | 0.291 | 0.079 | 3.89E-39 | Endocelia |
| Clic41 | Clic4 | 4.02E-42 | 0.938457523 | 0.442 | 0.148 | 9.13E-38 | Endocelia |
| Abcc4 | Abcc4 | 5.11E-42 | 1.617656618 | 0.386 | 0.136 | 1.16E-37 | Endocelia |
| Ptprk2 | Ptprk | 8.60E-41 | 0.90989534 | 0.653 | 0.266 | 1.95E-36 | Endocelia |
| Dlc12 | Dlc1 | 4.62E-40 | 2.920520772 | 0.526 | 0.269 | 1.05E-35 | Endocelia |
| Kitl | Kitl | 1.37E-39 | 1.762507744 | 0.477 | 0.21 | 3.11E-35 | Endocelia |
| Notch11 | Notch1 | 1.94E-39 | 0.904681009 | 0.284 | 0.075 | 4.42E-35 | Endocelia |
| Itpkb | Itpkb | 5.15E-39 | 0.927148155 | 0.263 | 0.067 | 1.17E-34 | Endocelia |
| Zfp36l11 | Zfp36l1 | 8.18E-39 | 0.900584604 | 0.274 | 0.073 | 1.86E-34 | Endocelia |
| St8sia4 | St8sia4 | 1.05E-38 | 1.663826837 | 0.407 | 0.159 | 2.39E-34 | Endocelia |
| Myo1b2 | Myo1b | 3.28E-37 | 1.490614055 | 0.628 | 0.362 | 7.44E-33 | Endocelia |
| Fry2 | Fry | 1.77E-35 | 1.159123677 | 0.884 | 0.778 | 4.01E-31 | Endocelia |
| Gnai2 | Gnai2 | 6.27E-35 | 1.142157245 | 0.361 | 0.131 | 1.42E-30 | Endocelia |
| 4931406P16Rik1 | 4931406P16Rik | 6.32E-33 | 1.170837468 | 0.509 | 0.251 | 1.44E-28 | Endocelia |
| Rassf3 | Rassf3 | 1.35E-32 | 0.92582156 | 0.253 | 0.073 | 3.07E-28 | Endocelia |
| Col4a1 | Col4a1 | 1.53E-32 | 1.034161821 | 0.316 | 0.11 | 3.48E-28 | Endocelia |
| Slc39a10 | Slc39a10 | 3.12E-32 | 1.863953691 | 0.484 | 0.254 | 7.09E-28 | Endocelia |
| Crip2 | Crip2 | 1.16E-31 | 1.033093062 | 0.288 | 0.095 | 2.63E-27 | Endocelia |
| Atp1a22 | Atp1a2 | 1.85E-31 | 2.076381675 | 0.47 | 0.228 | 4.19E-27 | Endocelia |
| Gpcpd11 | Gpcpd1 | 3.65E-31 | 2.150812425 | 0.716 | 0.532 | 8.30E-27 | Endocelia |
| Ptn2 | Ptn | 3.80E-31 | 1.495425781 | 0.793 | 0.585 | 8.63E-27 | Endocelia |
| Fbxl71 | Fbxl7 | 1.43E-30 | 1.131683516 | 0.256 | 0.078 | 3.26E-26 | Endocelia |
| Maoa | Maoa | 2.52E-30 | 0.971193291 | 0.316 | 0.114 | 5.73E-26 | Endocelia |
| Prex21 | Prex2 | 1.29E-29 | 0.751439905 | 0.568 | 0.296 | 2.94E-25 | Endocelia |
| Rbms11 | Rbms1 | 2.70E-29 | 1.080236541 | 0.775 | 0.569 | 6.12E-25 | Endocelia |
| Malat12 | Malat1 | 4.13E-29 | 0.38299258 | 1 | 1 | 9.38E-25 | Endocelia |
| Itga62 | Itga6 | 4.45E-28 | 0.968171724 | 0.281 | 0.093 | 1.01E-23 | Endocelia |
| Sparcl11 | Sparcl1 | 5.13E-28 | 1.070917418 | 0.519 | 0.27 | 1.16E-23 | Endocelia |
| Gab12 | Gab1 | 9.33E-28 | 0.565637881 | 0.568 | 0.255 | 2.12E-23 | Endocelia |
| St5 | St5 | 1.89E-27 | 1.011468895 | 0.337 | 0.133 | 4.29E-23 | Endocelia |
| Mtus12 | Mtus1 | 1.99E-27 | 1.06552207 | 0.439 | 0.205 | 4.52E-23 | Endocelia |
| Ctnna11 | Ctnna1 | 3.71E-27 | 0.84444488 | 0.463 | 0.223 | 8.43E-23 | Endocelia |
| Tmsb4x3 | Tmsb4x | 8.13E-27 | 1.770884975 | 0.726 | 0.584 | 1.85E-22 | Endocelia |
| Itpr23 | Itpr2 | 9.29E-27 | 0.883324262 | 0.337 | 0.127 | 2.11E-22 | Endocelia |
| Phactr21 | Phactr2 | 2.03E-26 | 0.674113209 | 0.312 | 0.11 | 4.60E-22 | Endocelia |
| Prkg12 | Prkg1 | 2.26E-26 | 1.014650682 | 0.811 | 0.588 | 5.14E-22 | Endocelia |
| Myo102 | Myo10 | 2.71E-26 | 1.281474468 | 0.396 | 0.184 | 6.15E-22 | Endocelia |
| Spock2 | Spock2 | 3.44E-26 | 2.05161501 | 0.625 | 0.453 | 7.82E-22 | Endocelia |
| Gm424183 | Gm42418 | 5.00E-26 | 1.022406846 | 0.996 | 0.999 | 1.14E-21 | Endocelia |
| Slc31a1 | Slc31a1 | 5.16E-26 | 0.807707076 | 0.274 | 0.097 | 1.17E-21 | Endocelia |
| Tbc1d4 | Tbc1d4 | 7.01E-26 | 1.617416857 | 0.4 | 0.194 | 1.59E-21 | Endocelia |
| Golim41 | Golim4 | 3.17E-25 | 0.883951303 | 0.33 | 0.133 | 7.20E-21 | Endocelia |
| Mob3b1 | Mob3b | 3.85E-24 | 0.542573103 | 0.351 | 0.135 | 8.74E-20 | Endocelia |
| Il34 | Il34 | 4.07E-24 | 1.431312297 | 0.312 | 0.131 | 9.25E-20 | Endocelia |
| Ablim1 | Ablim1 | 4.92E-24 | 1.916486399 | 0.565 | 0.376 | 1.12E-19 | Endocelia |
| Ctnnb1 | Ctnnb1 | 4.98E-24 | 1.104428865 | 0.481 | 0.27 | 1.13E-19 | Endocelia |
| Hip12 | Hip1 | 5.36E-24 | 1.411930587 | 0.596 | 0.401 | 1.22E-19 | Endocelia |
| Eogt | Eogt | 6.52E-24 | 1.063974165 | 0.316 | 0.135 | 1.48E-19 | Endocelia |
| Sgms1 | Sgms1 | 1.07E-23 | 2.408661453 | 0.677 | 0.546 | 2.42E-19 | Endocelia |
| Pard3b2 | Pard3b | 1.28E-23 | 1.012384869 | 0.456 | 0.231 | 2.90E-19 | Endocelia |
| Gbe1 | Gbe1 | 7.97E-23 | 0.879409256 | 0.344 | 0.152 | 1.81E-18 | Endocelia |
| Igf1r1 | Igf1r | 8.10E-23 | 2.369873879 | 0.765 | 0.677 | 1.84E-18 | Endocelia |
| Tfrc | Tfrc | 8.85E-23 | 1.237366367 | 0.365 | 0.176 | 2.01E-18 | Endocelia |
| Ppfibp11 | Ppfibp1 | 1.31E-22 | 0.741510352 | 0.26 | 0.095 | 2.97E-18 | Endocelia |
| Gm9843 | Gm9843 | 1.88E-22 | 1.327150535 | 0.421 | 0.231 | 4.26E-18 | Endocelia |
| Cyth3 | Cyth3 | 2.12E-22 | 1.006590234 | 0.358 | 0.166 | 4.82E-18 | Endocelia |
| Prkd32 | Prkd3 | 2.87E-22 | 0.463328092 | 0.305 | 0.112 | 6.52E-18 | Endocelia |
| Ubb3 | Ubb | 4.38E-22 | 1.144756707 | 0.747 | 0.611 | 9.95E-18 | Endocelia |
| Ptprm2 | Ptprm | 1.05E-21 | 1.563245499 | 0.635 | 0.476 | 2.37E-17 | Endocelia |
| Ccnd32 | Ccnd3 | 1.16E-21 | 0.535338412 | 0.302 | 0.114 | 2.63E-17 | Endocelia |
| Cst33 | Cst3 | 1.20E-21 | 0.999615017 | 0.744 | 0.567 | 2.73E-17 | Endocelia |
| Pls3 | Pls3 | 1.44E-21 | 1.087866024 | 0.354 | 0.164 | 3.28E-17 | Endocelia |
| Apbb21 | Apbb2 | 2.17E-21 | 0.919475511 | 0.772 | 0.692 | 4.93E-17 | Endocelia |
| Ptprg1 | Ptprg | 2.22E-21 | 2.465202727 | 0.646 | 0.498 | 5.04E-17 | Endocelia |
| Polk | Polk | 3.38E-21 | 1.039351702 | 0.312 | 0.138 | 7.68E-17 | Endocelia |
| Myo1e1 | Myo1e | 3.51E-21 | 0.466520087 | 0.319 | 0.121 | 7.97E-17 | Endocelia |
| Mcc1 | Mcc | 1.01E-20 | 1.207724392 | 0.309 | 0.134 | 2.30E-16 | Endocelia |
| Tjp1 | Tjp1 | 1.16E-20 | 1.108924825 | 0.825 | 0.792 | 2.63E-16 | Endocelia |
| Tshz21 | Tshz2 | 2.06E-20 | 1.212829975 | 0.361 | 0.173 | 4.69E-16 | Endocelia |
| Cmss13 | Cmss1 | 3.97E-20 | 0.97061005 | 0.898 | 0.883 | 9.01E-16 | Endocelia |
| Dab2ip | Dab2ip | 7.55E-20 | 0.829464294 | 0.386 | 0.203 | 1.72E-15 | Endocelia |
| Rnf144b | Rnf144b | 8.67E-20 | 0.797097292 | 0.274 | 0.113 | 1.97E-15 | Endocelia |
| Bmpr21 | Bmpr2 | 1.21E-19 | 1.203929448 | 0.674 | 0.557 | 2.75E-15 | Endocelia |
| Nfia4 | Nfia | 1.42E-19 | 0.346192592 | 0.744 | 0.424 | 3.22E-15 | Endocelia |
| Zbtb201 | Zbtb20 | 1.58E-19 | 0.515705801 | 0.965 | 0.964 | 3.59E-15 | Endocelia |
| Lhfp1 | Lhfp | 1.73E-19 | 1.259267289 | 0.288 | 0.122 | 3.93E-15 | Endocelia |
| Crim1 | Crim1 | 1.92E-19 | 0.928188582 | 0.554 | 0.36 | 4.35E-15 | Endocelia |
| Maml23 | Maml2 | 2.17E-19 | 0.668649292 | 0.589 | 0.349 | 4.94E-15 | Endocelia |
| Svil1 | Svil | 2.20E-19 | 0.919531982 | 0.463 | 0.26 | 5.00E-15 | Endocelia |
| Tnfrsf191 | Tnfrsf19 | 3.97E-19 | 0.70618216 | 0.382 | 0.19 | 9.02E-15 | Endocelia |
| Myl12b | Myl12b | 4.24E-19 | 0.943482056 | 0.435 | 0.25 | 9.64E-15 | Endocelia |
| Ppard | Ppard | 5.44E-19 | 0.705588277 | 0.305 | 0.132 | 1.24E-14 | Endocelia |
| Abhd21 | Abhd2 | 7.72E-19 | 1.066620567 | 0.596 | 0.436 | 1.75E-14 | Endocelia |
| Tanc12 | Tanc1 | 1.00E-18 | 0.826337972 | 0.354 | 0.167 | 2.28E-14 | Endocelia |
| Notch3 | Notch3 | 1.01E-18 | 1.497121514 | 0.263 | 0.113 | 2.29E-14 | Endocelia |
| Tgfbr31 | Tgfbr3 | 1.08E-18 | 0.897472979 | 0.481 | 0.295 | 2.45E-14 | Endocelia |
| Myh91 | Myh9 | 1.88E-18 | 0.91718212 | 0.372 | 0.193 | 4.27E-14 | Endocelia |
| Itm2b3 | Itm2b | 2.87E-18 | 1.026894278 | 0.646 | 0.498 | 6.53E-14 | Endocelia |
| Pdlim52 | Pdlim5 | 4.22E-18 | 0.868439989 | 0.312 | 0.142 | 9.59E-14 | Endocelia |
| Rpl9-ps6 | Rpl9-ps6 | 4.79E-18 | 1.15398466 | 0.467 | 0.293 | 1.09E-13 | Endocelia |
| Jcad1 | Jcad | 5.02E-18 | 1.081558269 | 0.491 | 0.312 | 1.14E-13 | Endocelia |
| mt-Co11 | mt-Co1 | 5.68E-18 | 0.958765408 | 0.789 | 0.703 | 1.29E-13 | Endocelia |
| Rgs12 | Rgs12 | 1.34E-17 | 0.589695146 | 0.26 | 0.108 | 3.05E-13 | Endocelia |
| Esyt2 | Esyt2 | 1.35E-17 | 1.157826651 | 0.698 | 0.605 | 3.07E-13 | Endocelia |
| Rplp1 | Rplp1 | 1.44E-17 | 0.916595482 | 0.365 | 0.193 | 3.28E-13 | Endocelia |
| Jund | Jund | 1.83E-17 | 0.615712502 | 0.277 | 0.121 | 4.16E-13 | Endocelia |
| Ldlrad32 | Ldlrad3 | 1.88E-17 | 0.940713358 | 0.361 | 0.184 | 4.27E-13 | Endocelia |
| Serinc31 | Serinc3 | 2.86E-17 | 0.939435615 | 0.477 | 0.301 | 6.50E-13 | Endocelia |
| Ptma2 | Ptma | 3.90E-17 | 0.997362772 | 0.488 | 0.309 | 8.85E-13 | Endocelia |
| Adipor21 | Adipor2 | 5.02E-17 | 0.662361224 | 0.491 | 0.285 | 1.14E-12 | Endocelia |
| Rapgef21 | Rapgef2 | 5.05E-17 | 1.12418751 | 0.712 | 0.594 | 1.15E-12 | Endocelia |
| Lama22 | Lama2 | 5.11E-17 | 0.694123686 | 0.411 | 0.198 | 1.16E-12 | Endocelia |
| Myl6 | Myl6 | 1.18E-16 | 0.604194107 | 0.263 | 0.115 | 2.67E-12 | Endocelia |
| Ftl1 | Ftl1 | 1.32E-16 | 0.842510544 | 0.267 | 0.121 | 3.00E-12 | Endocelia |
| Airn | Airn | 1.52E-16 | 1.298789256 | 0.319 | 0.162 | 3.45E-12 | Endocelia |
| Eef1a13 | Eef1a1 | 1.72E-16 | 1.011536049 | 0.663 | 0.531 | 3.91E-12 | Endocelia |
| Rpl19 | Rpl19 | 1.91E-16 | 0.640512202 | 0.267 | 0.117 | 4.34E-12 | Endocelia |
| Tcf43 | Tcf4 | 2.03E-16 | 0.654233206 | 0.835 | 0.684 | 4.61E-12 | Endocelia |
| Col4a3bp1 | Col4a3bp | 2.76E-16 | 1.31447508 | 0.537 | 0.398 | 6.26E-12 | Endocelia |
| Mpzl12 | Mpzl1 | 3.30E-16 | 0.703485946 | 0.418 | 0.238 | 7.49E-12 | Endocelia |
| Wls1 | Wls | 3.57E-16 | 0.775905689 | 0.312 | 0.141 | 8.10E-12 | Endocelia |
| Arl4a | Arl4a | 7.02E-16 | 0.929515895 | 0.295 | 0.146 | 1.59E-11 | Endocelia |
| App1 | App | 8.39E-16 | 0.568785438 | 0.86 | 0.893 | 1.91E-11 | Endocelia |
| Luzp1 | Luzp1 | 1.00E-15 | 1.018550597 | 0.495 | 0.34 | 2.28E-11 | Endocelia |
| Prdm51 | Prdm5 | 1.31E-15 | 0.548093155 | 0.309 | 0.147 | 2.99E-11 | Endocelia |
| Rpl4 | Rpl4 | 2.03E-15 | 0.640440193 | 0.263 | 0.119 | 4.61E-11 | Endocelia |
| Nek72 | Nek7 | 2.06E-15 | 0.496086748 | 0.358 | 0.175 | 4.67E-11 | Endocelia |
| Actb3 | Actb | 2.81E-15 | 1.182039879 | 0.723 | 0.633 | 6.38E-11 | Endocelia |
| Fth12 | Fth1 | 3.17E-15 | 1.065243143 | 0.611 | 0.476 | 7.19E-11 | Endocelia |
| Zbtb16 | Zbtb16 | 3.72E-15 | 0.646814561 | 0.27 | 0.12 | 8.45E-11 | Endocelia |
| Nhsl11 | Nhsl1 | 4.45E-15 | 0.366065419 | 0.263 | 0.11 | 1.01E-10 | Endocelia |
| Extl32 | Extl3 | 5.07E-15 | 0.853695607 | 0.453 | 0.284 | 1.15E-10 | Endocelia |
| Rpl41 | Rpl41 | 5.71E-15 | 1.026048481 | 0.421 | 0.261 | 1.30E-10 | Endocelia |
| Wasf21 | Wasf2 | 8.59E-15 | 0.700183152 | 0.435 | 0.264 | 1.95E-10 | Endocelia |
| Gnas2 | Gnas | 9.94E-15 | 0.95848745 | 0.635 | 0.531 | 2.26E-10 | Endocelia |
| mt-Co3 | mt-Co3 | 1.22E-14 | 0.827682519 | 0.818 | 0.775 | 2.78E-10 | Endocelia |
| Prkch1 | Prkch | 1.24E-14 | 0.858830013 | 0.558 | 0.398 | 2.82E-10 | Endocelia |
| Ece1 | Ece1 | 1.38E-14 | 0.922327565 | 0.368 | 0.22 | 3.14E-10 | Endocelia |
| Dach11 | Dach1 | 2.05E-14 | 0.570950872 | 0.765 | 0.615 | 4.65E-10 | Endocelia |
| Cfl1 | Cfl1 | 5.11E-14 | 0.824501667 | 0.375 | 0.214 | 1.16E-09 | Endocelia |
| Rrm2b | Rrm2b | 5.52E-14 | 0.801222116 | 0.361 | 0.204 | 1.25E-09 | Endocelia |
| Ubc1 | Ubc | 6.31E-14 | 0.841012594 | 0.407 | 0.248 | 1.43E-09 | Endocelia |
| Akap133 | Akap13 | 6.79E-14 | 0.953771186 | 0.404 | 0.252 | 1.54E-09 | Endocelia |
| Rpl14 | Rpl14 | 8.98E-14 | 0.689611399 | 0.302 | 0.154 | 2.04E-09 | Endocelia |
| Pitpnc12 | Pitpnc1 | 9.14E-14 | 1.067207439 | 0.73 | 0.615 | 2.08E-09 | Endocelia |
| Laptm4a | Laptm4a | 9.45E-14 | 0.857946561 | 0.354 | 0.206 | 2.15E-09 | Endocelia |
| Cnot62 | Cnot6 | 1.16E-13 | 1.01258666 | 0.523 | 0.401 | 2.64E-09 | Endocelia |
| Cd813 | Cd81 | 1.35E-13 | 0.860508985 | 0.481 | 0.326 | 3.08E-09 | Endocelia |
| Lamc11 | Lamc1 | 2.01E-13 | 1.080274081 | 0.456 | 0.311 | 4.56E-09 | Endocelia |
| Gm11808 | Gm11808 | 2.16E-13 | 0.865568313 | 0.295 | 0.154 | 4.91E-09 | Endocelia |
| Stard93 | Stard9 | 2.26E-13 | 0.505655917 | 0.344 | 0.176 | 5.14E-09 | Endocelia |
| Gm10073 | Gm10073 | 3.07E-13 | 0.707698271 | 0.27 | 0.136 | 6.98E-09 | Endocelia |
| Rdx1 | Rdx | 3.07E-13 | 0.462727157 | 0.396 | 0.221 | 6.98E-09 | Endocelia |
| Plcl12 | Plcl1 | 3.13E-13 | 0.659803913 | 0.702 | 0.572 | 7.12E-09 | Endocelia |
| Arhgap421 | Arhgap42 | 3.19E-13 | 1.275094188 | 0.253 | 0.127 | 7.25E-09 | Endocelia |
| Eef2 | Eef2 | 3.75E-13 | 0.77187315 | 0.316 | 0.171 | 8.51E-09 | Endocelia |
| Map3k11 | Map3k1 | 3.77E-13 | 0.539434126 | 0.27 | 0.132 | 8.56E-09 | Endocelia |
| Plcb41 | Plcb4 | 4.02E-13 | 0.96730428 | 0.396 | 0.246 | 9.13E-09 | Endocelia |
| Lima11 | Lima1 | 6.54E-13 | 0.675608472 | 0.291 | 0.148 | 1.49E-08 | Endocelia |
| Serf2 | Serf2 | 7.25E-13 | 0.676069854 | 0.274 | 0.141 | 1.65E-08 | Endocelia |
| Elf13 | Elf1 | 7.91E-13 | 0.440312588 | 0.288 | 0.136 | 1.80E-08 | Endocelia |
| Tjp22 | Tjp2 | 8.83E-13 | 0.364616409 | 0.291 | 0.134 | 2.00E-08 | Endocelia |
| St6gal14 | St6gal1 | 1.09E-12 | 0.26405592 | 0.435 | 0.229 | 2.47E-08 | Endocelia |
| Actg12 | Actg1 | 1.26E-12 | 0.924698081 | 0.467 | 0.327 | 2.85E-08 | Endocelia |
| Capns1 | Capns1 | 1.31E-12 | 0.527845909 | 0.26 | 0.126 | 2.97E-08 | Endocelia |
| Slc3a2 | Slc3a2 | 1.41E-12 | 0.900050495 | 0.323 | 0.186 | 3.21E-08 | Endocelia |
| Mal1 | Mal | 1.44E-12 | 0.575828301 | 0.421 | 0.249 | 3.28E-08 | Endocelia |
| H3f3a2 | H3f3a | 2.42E-12 | 0.867544907 | 0.509 | 0.381 | 5.50E-08 | Endocelia |
| mt-Nd4 | mt-Nd4 | 2.50E-12 | 0.860240057 | 0.698 | 0.605 | 5.69E-08 | Endocelia |
| Purb1 | Purb | 2.62E-12 | 0.782920065 | 0.46 | 0.308 | 5.95E-08 | Endocelia |
| Sema6a3 | Sema6a | 3.03E-12 | 0.403985136 | 0.481 | 0.277 | 6.87E-08 | Endocelia |
| Rapgef41 | Rapgef4 | 3.10E-12 | 0.643856684 | 0.747 | 0.623 | 7.05E-08 | Endocelia |
| Gpd2 | Gpd2 | 3.17E-12 | 0.705667879 | 0.309 | 0.167 | 7.21E-08 | Endocelia |
| Shroom2 | Shroom2 | 3.37E-12 | 0.705864904 | 0.316 | 0.169 | 7.64E-08 | Endocelia |
| Selenok | Selenok | 4.36E-12 | 0.69905153 | 0.382 | 0.231 | 9.90E-08 | Endocelia |
| Tmtc23 | Tmtc2 | 4.79E-12 | 1.221648192 | 0.621 | 0.511 | 1.09E-07 | Endocelia |
| Lims13 | Lims1 | 6.14E-12 | 0.8718757 | 0.519 | 0.374 | 1.39E-07 | Endocelia |
| Calr | Calr | 6.67E-12 | 0.70566388 | 0.337 | 0.196 | 1.51E-07 | Endocelia |
| Itgb11 | Itgb1 | 7.06E-12 | 0.832944831 | 0.389 | 0.254 | 1.60E-07 | Endocelia |
| Arhgap61 | Arhgap6 | 8.08E-12 | 1.213019581 | 0.498 | 0.364 | 1.84E-07 | Endocelia |
| mt-Co2 | mt-Co2 | 1.09E-11 | 1.035330115 | 0.719 | 0.655 | 2.47E-07 | Endocelia |
| Rpl27-ps3 | Rpl27-ps3 | 1.40E-11 | 0.680910552 | 0.277 | 0.15 | 3.19E-07 | Endocelia |
| Insr3 | Insr | 2.28E-11 | 0.778699362 | 0.663 | 0.565 | 5.17E-07 | Endocelia |
| Sash12 | Sash1 | 2.39E-11 | 0.572033365 | 0.505 | 0.354 | 5.43E-07 | Endocelia |
| mt-Atp6 | mt-Atp6 | 2.47E-11 | 1.009596355 | 0.796 | 0.789 | 5.61E-07 | Endocelia |
| Usp6nl1 | Usp6nl | 2.95E-11 | 0.468477709 | 0.295 | 0.152 | 6.70E-07 | Endocelia |
| Nxn1 | Nxn | 3.77E-11 | 0.62479913 | 0.274 | 0.142 | 8.56E-07 | Endocelia |
| Apoe2 | Apoe | 4.03E-11 | 0.600571117 | 0.66 | 0.546 | 9.14E-07 | Endocelia |
| Tmbim6 | Tmbim6 | 4.53E-11 | 0.715090531 | 0.375 | 0.24 | 1.03E-06 | Endocelia |
| Klhl52 | Klhl5 | 4.69E-11 | 0.804205448 | 0.33 | 0.199 | 1.07E-06 | Endocelia |
| Gcnt2 | Gcnt2 | 5.59E-11 | 0.728840869 | 0.428 | 0.288 | 1.27E-06 | Endocelia |
| Ppia2 | Ppia | 7.56E-11 | 0.897083375 | 0.491 | 0.37 | 1.72E-06 | Endocelia |
| Apod1 | Apod | 9.46E-11 | 0.930924518 | 0.302 | 0.161 | 2.15E-06 | Endocelia |
| Aplp2 | Aplp2 | 1.03E-10 | 0.720163942 | 0.646 | 0.566 | 2.34E-06 | Endocelia |
| Myo1d1 | Myo1d | 1.08E-10 | 0.483539675 | 0.484 | 0.319 | 2.46E-06 | Endocelia |
| Tsc22d1 | Tsc22d1 | 1.42E-10 | 0.849939515 | 0.691 | 0.654 | 3.23E-06 | Endocelia |
| Glul2 | Glul | 1.54E-10 | 0.542223974 | 0.354 | 0.204 | 3.49E-06 | Endocelia |
| Epb41l22 | Epb41l2 | 1.81E-10 | 0.265474091 | 0.453 | 0.287 | 4.12E-06 | Endocelia |
| Sgpp2 | Sgpp2 | 1.84E-10 | 0.759970858 | 0.26 | 0.145 | 4.19E-06 | Endocelia |
| Bicc11 | Bicc1 | 2.07E-10 | 0.795218465 | 0.351 | 0.209 | 4.70E-06 | Endocelia |
| H3f3b | H3f3b | 2.28E-10 | 0.919783074 | 0.418 | 0.305 | 5.17E-06 | Endocelia |
| Hspa82 | Hspa8 | 2.40E-10 | 0.865567572 | 0.54 | 0.424 | 5.44E-06 | Endocelia |
| Selenow1 | Selenow | 2.62E-10 | 0.714793039 | 0.484 | 0.36 | 5.95E-06 | Endocelia |
| Dynll1 | Dynll1 | 3.65E-10 | 0.726498197 | 0.411 | 0.281 | 8.29E-06 | Endocelia |
| Tmod3 | Tmod3 | 4.61E-10 | 0.778595137 | 0.375 | 0.249 | 1.05E-05 | Endocelia |
| Stk33 | Stk3 | 4.73E-10 | 0.549896956 | 0.421 | 0.27 | 1.08E-05 | Endocelia |
| Iqgap1 | Iqgap1 | 5.90E-10 | 0.692480577 | 0.4 | 0.272 | 1.34E-05 | Endocelia |
| Lmo21 | Lmo2 | 7.14E-10 | 0.630382514 | 0.298 | 0.175 | 1.62E-05 | Endocelia |
| mt-Nd2 | mt-Nd2 | 7.66E-10 | 0.945334297 | 0.572 | 0.477 | 1.74E-05 | Endocelia |
| Eif11 | Eif1 | 8.87E-10 | 0.646281012 | 0.425 | 0.294 | 2.01E-05 | Endocelia |
| Pcp4l1 | Pcp4l1 | 1.24E-09 | 0.841812579 | 0.386 | 0.266 | 2.82E-05 | Endocelia |
| Eps82 | Eps8 | 2.24E-09 | 0.722795991 | 0.253 | 0.139 | 5.08E-05 | Endocelia |
| mt-Nd3 | mt-Nd3 | 2.30E-09 | 0.479794788 | 0.26 | 0.143 | 5.22E-05 | Endocelia |
| Wdr892 | Wdr89 | 2.57E-09 | 0.664744652 | 0.382 | 0.259 | 5.84E-05 | Endocelia |
| 1700020I14Rik | 1700020I14Rik | 2.86E-09 | 0.66660312 | 0.347 | 0.222 | 6.50E-05 | Endocelia |
| Ss181 | Ss18 | 2.87E-09 | 0.400102566 | 0.284 | 0.158 | 6.52E-05 | Endocelia |
| Calm13 | Calm1 | 2.88E-09 | 0.735345961 | 0.67 | 0.626 | 6.53E-05 | Endocelia |
| Il6st1 | Il6st | 3.70E-09 | 0.520566387 | 0.253 | 0.142 | 8.40E-05 | Endocelia |
| Susd61 | Susd6 | 3.73E-09 | 0.809429659 | 0.46 | 0.344 | 8.48E-05 | Endocelia |
| mt-Nd1 | mt-Nd1 | 3.84E-09 | 0.803360111 | 0.53 | 0.419 | 8.73E-05 | Endocelia |
| Hdac7 | Hdac7 | 4.72E-09 | 0.495196412 | 0.274 | 0.153 | 0.000107112 | Endocelia |
| mt-Cytb | mt-Cytb | 5.02E-09 | 0.941619376 | 0.646 | 0.589 | 0.000114057 | Endocelia |
| Rap1b1 | Rap1b | 5.08E-09 | 0.466679732 | 0.291 | 0.171 | 0.000115472 | Endocelia |
| Pcdh19 | Pcdh19 | 5.14E-09 | 0.77427648 | 0.26 | 0.153 | 0.000116757 | Endocelia |
| Fermt21 | Fermt2 | 5.84E-09 | 0.669985862 | 0.467 | 0.346 | 0.000132699 | Endocelia |
| Wwc2 | Wwc2 | 7.08E-09 | 0.692308552 | 0.407 | 0.288 | 0.000160827 | Endocelia |
| Gabarapl1 | Gabarapl1 | 7.14E-09 | 0.680851915 | 0.326 | 0.212 | 0.000162257 | Endocelia |
| Rhoa1 | Rhoa | 7.42E-09 | 0.717749 | 0.365 | 0.251 | 0.000168548 | Endocelia |
| Bnip3l | Bnip3l | 7.49E-09 | 0.612142422 | 0.333 | 0.213 | 0.000170195 | Endocelia |
| Pdzd21 | Pdzd2 | 7.57E-09 | 0.516456513 | 0.702 | 0.575 | 0.000171966 | Endocelia |
| Rps27rt1 | Rps27rt | 7.70E-09 | 0.870595101 | 0.358 | 0.248 | 0.000174801 | Endocelia |
| Snrk2 | Snrk | 8.81E-09 | 0.730997598 | 0.375 | 0.267 | 0.000200028 | Endocelia |
| Ttc283 | Ttc28 | 8.86E-09 | 0.559796902 | 0.414 | 0.28 | 0.000201258 | Endocelia |
| Ankrd443 | Ankrd44 | 9.35E-09 | 0.444810987 | 0.351 | 0.213 | 0.000212413 | Endocelia |
| Fryl2 | Fryl | 9.87E-09 | 0.589201699 | 0.667 | 0.612 | 0.000224066 | Endocelia |
| Lyn1 | Lyn | 1.01E-08 | 0.385175795 | 0.319 | 0.199 | 0.000230021 | Endocelia |
| Dock92 | Dock9 | 1.13E-08 | 0.790984911 | 0.572 | 0.484 | 0.000256938 | Endocelia |
| Cdc421 | Cdc42 | 1.29E-08 | 0.657171554 | 0.575 | 0.501 | 0.000292681 | Endocelia |
| Slc6a61 | Slc6a6 | 1.34E-08 | 0.900995429 | 0.66 | 0.648 | 0.000304354 | Endocelia |
| Map42 | Map4 | 1.34E-08 | 0.391736121 | 0.677 | 0.594 | 0.000304602 | Endocelia |
| Atxn7l3b | Atxn7l3b | 1.59E-08 | 0.595534913 | 0.305 | 0.193 | 0.000360727 | Endocelia |
| Agfg11 | Agfg1 | 1.81E-08 | 0.742973694 | 0.495 | 0.397 | 0.000410659 | Endocelia |
| Ror11 | Ror1 | 1.81E-08 | 1.092689411 | 0.396 | 0.273 | 0.000412185 | Endocelia |
| Dbp | Dbp | 1.97E-08 | 0.6335644 | 0.358 | 0.241 | 0.000447915 | Endocelia |
| Rasal2 | Rasal2 | 1.98E-08 | 0.851621483 | 0.705 | 0.706 | 0.000450851 | Endocelia |
| Sept111 | 11-Sep | 2.29E-08 | 0.757392753 | 0.533 | 0.445 | 0.000519029 | Endocelia |
| Cnot6l1 | Cnot6l | 2.50E-08 | 0.700170493 | 0.537 | 0.441 | 0.000568033 | Endocelia |
| Mxd4 | Mxd4 | 2.94E-08 | 0.494418839 | 0.305 | 0.188 | 0.000668512 | Endocelia |
| Tm9sf3 | Tm9sf3 | 3.15E-08 | 0.541649626 | 0.428 | 0.31 | 0.000715748 | Endocelia |
| Sh3bgrl | Sh3bgrl | 3.17E-08 | 0.627591571 | 0.305 | 0.192 | 0.000719226 | Endocelia |
| Reep32 | Reep3 | 4.14E-08 | 0.487067266 | 0.382 | 0.255 | 0.000940431 | Endocelia |
| Tspan91 | Tspan9 | 4.25E-08 | 0.298391803 | 0.277 | 0.156 | 0.000964624 | Endocelia |
| Rundc3b1 | Rundc3b | 4.46E-08 | 1.026763338 | 0.551 | 0.473 | 0.001013366 | Endocelia |
| Nbeal11 | Nbeal1 | 4.72E-08 | 0.658640984 | 0.6 | 0.507 | 0.001072217 | Endocelia |
| Hnrnpa0 | Hnrnpa0 | 6.16E-08 | 0.445338273 | 0.26 | 0.152 | 0.001398989 | Endocelia |
| Tcf122 | Tcf12 | 6.33E-08 | 0.345973989 | 0.814 | 0.851 | 0.001438185 | Endocelia |
| Nxpe4 | Nxpe4 | 6.89E-08 | 0.898232823 | 0.491 | 0.405 | 0.001565602 | Endocelia |
| Tmpo | Tmpo | 6.93E-08 | 0.382051238 | 0.263 | 0.154 | 0.001575076 | Endocelia |
| Ptbp32 | Ptbp3 | 7.13E-08 | 0.615085869 | 0.34 | 0.227 | 0.001618634 | Endocelia |
| Mt1 | Mt1 | 7.33E-08 | 0.546385239 | 0.256 | 0.149 | 0.001665354 | Endocelia |
| Usp53 | Usp53 | 7.35E-08 | 0.680702132 | 0.288 | 0.183 | 0.00166887 | Endocelia |
| Lrrc8c | Lrrc8c | 8.19E-08 | 0.671865194 | 0.379 | 0.274 | 0.001859977 | Endocelia |
| Oaz11 | Oaz1 | 8.56E-08 | 0.578517894 | 0.396 | 0.276 | 0.001944027 | Endocelia |
| Hmgb1 | Hmgb1 | 9.07E-08 | 0.52212292 | 0.323 | 0.21 | 0.002059823 | Endocelia |
| Cd200 | Cd200 | 9.37E-08 | 0.784930102 | 0.27 | 0.173 | 0.002128971 | Endocelia |
| Rreb12 | Rreb1 | 9.76E-08 | 0.353880487 | 0.34 | 0.217 | 0.002216049 | Endocelia |
| Arhgef31 | Arhgef3 | 1.01E-07 | 0.712801694 | 0.393 | 0.285 | 0.002290059 | Endocelia |
| Etv63 | Etv6 | 1.13E-07 | 0.708408006 | 0.435 | 0.324 | 0.00255755 | Endocelia |
| Slc12a21 | Slc12a2 | 1.32E-07 | 0.304041771 | 0.491 | 0.355 | 0.002989234 | Endocelia |
| Aff11 | Aff1 | 1.38E-07 | 0.415145506 | 0.295 | 0.181 | 0.00314137 | Endocelia |
| Col4a2 | Col4a2 | 1.45E-07 | 0.599855835 | 0.309 | 0.202 | 0.003299931 | Endocelia |
| Gatad1 | Gatad1 | 1.51E-07 | 0.379082982 | 0.256 | 0.15 | 0.003437468 | Endocelia |
| Ptms | Ptms | 1.77E-07 | 0.701875932 | 0.463 | 0.366 | 0.004020359 | Endocelia |
| Prdx1 | Prdx1 | 1.95E-07 | 0.291337478 | 0.284 | 0.169 | 0.004418585 | Endocelia |
| Lamp1 | Lamp1 | 2.54E-07 | 0.51536572 | 0.354 | 0.242 | 0.005775576 | Endocelia |
| Gsk3b1 | Gsk3b | 2.55E-07 | 0.421312499 | 0.779 | 0.759 | 0.00578145 | Endocelia |
| Ddx52 | Ddx5 | 2.90E-07 | 0.428614417 | 0.793 | 0.786 | 0.006591912 | Endocelia |
| Ywhaq1 | Ywhaq | 3.01E-07 | 0.365883375 | 0.526 | 0.405 | 0.006827134 | Endocelia |
| Cox8a1 | Cox8a | 3.34E-07 | 0.655817192 | 0.407 | 0.303 | 0.007575332 | Endocelia |
| Nr3c12 | Nr3c1 | 3.98E-07 | 0.584660539 | 0.523 | 0.433 | 0.0090334 | Endocelia |
| Bcl2l11 | Bcl2l1 | 4.13E-07 | 0.437671829 | 0.502 | 0.384 | 0.009386913 | Endocelia |
| Pdxk | Pdxk | 4.36E-07 | 0.439866774 | 0.298 | 0.193 | 0.009901521 | Endocelia |
| Mef2c1 | Mef2c | 4.74E-07 | 0.419719886 | 0.667 | 0.598 | 0.01077281 | Endocelia |
| Sypl | Sypl | 5.53E-07 | 0.553625785 | 0.281 | 0.179 | 0.012570323 | Endocelia |
| Plxdc22 | Plxdc2 | 5.90E-07 | 0.389871327 | 0.642 | 0.538 | 0.013398109 | Endocelia |
| Atp5g3 | Atp5g3 | 6.50E-07 | 0.572138417 | 0.263 | 0.163 | 0.014774153 | Endocelia |
| Add32 | Add3 | 7.55E-07 | 0.51598677 | 0.544 | 0.454 | 0.0171492 | Endocelia |
| Bri3 | Bri3 | 8.09E-07 | 0.445329778 | 0.274 | 0.176 | 0.018373508 | Endocelia |
| Pip5k1b1 | Pip5k1b | 8.96E-07 | 0.862210774 | 0.256 | 0.164 | 0.020347301 | Endocelia |
| Unc13b | Unc13b | 9.61E-07 | 0.720464748 | 0.302 | 0.211 | 0.021829462 | Endocelia |
| Calm3 | Calm3 | 1.08E-06 | 0.54963174 | 0.33 | 0.233 | 0.024569303 | Endocelia |
| Agrn | Agrn | 1.09E-06 | 0.586191204 | 0.365 | 0.264 | 0.024645844 | Endocelia |
| Actn41 | Actn4 | 1.20E-06 | 0.646469694 | 0.446 | 0.358 | 0.027323787 | Endocelia |
| Eif4g22 | Eif4g2 | 1.26E-06 | 0.547954735 | 0.365 | 0.26 | 0.028579287 | Endocelia |
| Foxp11 | Foxp1 | 1.46E-06 | 0.251828814 | 0.881 | 0.789 | 0.033191564 | Endocelia |
| Gmds1 | Gmds | 1.56E-06 | 0.751789311 | 0.614 | 0.557 | 0.035440225 | Endocelia |
| Mfhas1 | Mfhas1 | 1.68E-06 | 0.649445004 | 0.344 | 0.25 | 0.038180731 | Endocelia |
| Rsu12 | Rsu1 | 1.75E-06 | 0.387938036 | 0.365 | 0.258 | 0.039757658 | Endocelia |
| Picalm2 | Picalm | 1.96E-06 | 0.330444336 | 0.635 | 0.58 | 0.044575204 | Endocelia |
| Gng123 | Gng12 | 2.05E-06 | 0.371168432 | 0.295 | 0.182 | 0.046581763 | Endocelia |
| Tmed7 | Tmed7 | 2.45E-06 | 0.388980343 | 0.253 | 0.155 | 0.055721311 | Endocelia |
| Sorbs12 | Sorbs1 | 2.46E-06 | 0.481324588 | 0.772 | 0.756 | 0.055888044 | Endocelia |
| Tmem30a | Tmem30a | 2.51E-06 | 0.56049788 | 0.439 | 0.337 | 0.056933309 | Endocelia |
| Fcho22 | Fcho2 | 2.69E-06 | 0.554753566 | 0.575 | 0.512 | 0.061007015 | Endocelia |
| Pkd22 | Pkd2 | 2.69E-06 | 0.400633875 | 0.46 | 0.348 | 0.061113702 | Endocelia |
| Plekhh2 | Plekhh2 | 2.75E-06 | 0.452353012 | 0.267 | 0.171 | 0.062368618 | Endocelia |
| Tspan131 | Tspan13 | 2.81E-06 | 0.616161648 | 0.425 | 0.338 | 0.063819923 | Endocelia |
| Tspan51 | Tspan5 | 2.82E-06 | 0.595772784 | 0.691 | 0.679 | 0.063946075 | Endocelia |
| Mrfap1 | Mrfap1 | 2.83E-06 | 0.494306029 | 0.263 | 0.171 | 0.064284798 | Endocelia |
| Rac11 | Rac1 | 3.01E-06 | 0.444626323 | 0.354 | 0.255 | 0.068364296 | Endocelia |
| Atp7a | Atp7a | 3.21E-06 | 0.515494672 | 0.253 | 0.159 | 0.073013603 | Endocelia |
| Zfp362 | Zfp362 | 3.85E-06 | 0.355363378 | 0.253 | 0.161 | 0.087463391 | Endocelia |
| Usp251 | Usp25 | 4.01E-06 | 0.506732249 | 0.407 | 0.305 | 0.091067561 | Endocelia |
| Filip11 | Filip1 | 4.18E-06 | 0.664967107 | 0.361 | 0.277 | 0.09492297 | Endocelia |
| Arhgef121 | Arhgef12 | 5.05E-06 | 0.456442306 | 0.695 | 0.675 | 0.114788535 | Endocelia |
| Tmtc11 | Tmtc1 | 5.44E-06 | 0.500844298 | 0.614 | 0.529 | 0.12352563 | Endocelia |
| Hnrnpa31 | Hnrnpa3 | 5.77E-06 | 0.629303787 | 0.411 | 0.324 | 0.131045342 | Endocelia |
| Selenof | Selenof | 5.95E-06 | 0.497277448 | 0.284 | 0.192 | 0.13507294 | Endocelia |
| Hnrnpk1 | Hnrnpk | 6.30E-06 | 0.549707417 | 0.432 | 0.342 | 0.143176225 | Endocelia |
| Nfic | Nfic | 6.58E-06 | 0.355107838 | 0.277 | 0.183 | 0.149473358 | Endocelia |
| Oaz2 | Oaz2 | 8.39E-06 | 0.514624525 | 0.309 | 0.215 | 0.190539026 | Endocelia |
| Pnpla72 | Pnpla7 | 8.78E-06 | 0.469279479 | 0.34 | 0.239 | 0.199345345 | Endocelia |
| Ptk21 | Ptk2 | 9.68E-06 | 0.448485907 | 0.758 | 0.79 | 0.219903965 | Endocelia |
| Hipk1 | Hipk1 | 9.92E-06 | 0.454506706 | 0.372 | 0.288 | 0.225411132 | Endocelia |
| Sumo21 | Sumo2 | 1.20E-05 | 0.618936713 | 0.414 | 0.335 | 0.273021647 | Endocelia |
| Arpc3 | Arpc3 | 1.34E-05 | 0.446252313 | 0.253 | 0.166 | 0.305348614 | Endocelia |
| Sh3rf12 | Sh3rf1 | 1.54E-05 | 0.690539491 | 0.414 | 0.34 | 0.350202545 | Endocelia |
| Sp1 | Sp1 | 1.91E-05 | 0.305682481 | 0.263 | 0.172 | 0.433825805 | Endocelia |
| Mllt31 | Mllt3 | 1.95E-05 | 0.512840417 | 0.705 | 0.68 | 0.442218385 | Endocelia |
| Lrrc581 | Lrrc58 | 1.96E-05 | 0.592731421 | 0.386 | 0.3 | 0.445264006 | Endocelia |
| Cfl2 | Cfl2 | 2.06E-05 | 0.362396353 | 0.333 | 0.235 | 0.468035431 | Endocelia |
| 1810013L24Rik1 | 1810013L24Rik | 2.08E-05 | 0.468916033 | 0.396 | 0.296 | 0.472666777 | Endocelia |
| Mcf2l1 | Mcf2l | 2.08E-05 | 0.73221976 | 0.477 | 0.415 | 0.473261079 | Endocelia |
| Magi3 | Magi3 | 2.14E-05 | 0.648509707 | 0.523 | 0.461 | 0.486334633 | Endocelia |
| Igsf81 | Igsf8 | 2.15E-05 | 0.573745969 | 0.295 | 0.213 | 0.488741743 | Endocelia |
| Hnrnpf | Hnrnpf | 2.24E-05 | 0.591234092 | 0.291 | 0.206 | 0.50962431 | Endocelia |
| Plce12 | Plce1 | 2.32E-05 | 1.073805046 | 0.302 | 0.22 | 0.52624047 | Endocelia |
| B230219D22Rik | B230219D22Rik | 2.40E-05 | 0.405154358 | 0.277 | 0.19 | 0.545503028 | Endocelia |
| Sbf21 | Sbf2 | 2.40E-05 | 0.445349912 | 0.758 | 0.763 | 0.546199008 | Endocelia |
| Diaph22 | Diaph2 | 2.51E-05 | 0.415056567 | 0.786 | 0.774 | 0.570411425 | Endocelia |
| Kif5b2 | Kif5b | 2.70E-05 | 0.431782703 | 0.572 | 0.517 | 0.612920117 | Endocelia |
| Ppp3cc | Ppp3cc | 2.72E-05 | 0.565746576 | 0.354 | 0.268 | 0.618110483 | Endocelia |
| Zfand32 | Zfand3 | 2.89E-05 | 0.588723078 | 0.663 | 0.643 | 0.656832893 | Endocelia |
| Tpd521 | Tpd52 | 3.12E-05 | 0.391897662 | 0.372 | 0.273 | 0.708498881 | Endocelia |
| Ndufa4 | Ndufa4 | 3.31E-05 | 0.386900343 | 0.263 | 0.175 | 0.75250261 | Endocelia |
| Hsp90ab11 | Hsp90ab1 | 3.56E-05 | 0.523073344 | 0.463 | 0.385 | 0.808080478 | Endocelia |
| Chn22 | Chn2 | 3.56E-05 | 0.618373619 | 0.467 | 0.375 | 0.809184977 | Endocelia |
| Hprt | Hprt | 3.68E-05 | 0.552097892 | 0.323 | 0.237 | 0.835564757 | Endocelia |
| Hspa5 | Hspa5 | 3.70E-05 | 0.52482661 | 0.302 | 0.217 | 0.840962103 | Endocelia |
| Aes | Aes | 3.72E-05 | 0.408130419 | 0.295 | 0.209 | 0.844285745 | Endocelia |
| Lars2 | Lars2 | 3.90E-05 | 0.549267993 | 0.544 | 0.487 | 0.885865486 | Endocelia |
| Max | Max | 4.03E-05 | 0.352329576 | 0.281 | 0.197 | 0.915115292 | Endocelia |
| Ddx3x | Ddx3x | 4.15E-05 | 0.462625006 | 0.347 | 0.265 | 0.941781976 | Endocelia |
| Rapgef51 | Rapgef5 | 4.25E-05 | 0.866973451 | 0.561 | 0.507 | 0.965153995 | Endocelia |
| Mtss13 | Mtss1 | 4.74E-05 | 0.407794274 | 0.368 | 0.27 | 1 | Endocelia |
| Slc25a4 | Slc25a4 | 4.76E-05 | 0.557905926 | 0.404 | 0.326 | 1 | Endocelia |
| Fam13c3 | Fam13c | 4.84E-05 | 0.338116607 | 0.481 | 0.4 | 1 | Endocelia |
| Epn22 | Epn2 | 4.88E-05 | 0.286608668 | 0.579 | 0.522 | 1 | Endocelia |
| Adgrl21 | Adgrl2 | 5.22E-05 | 0.637814782 | 0.54 | 0.508 | 1 | Endocelia |
| Itpr11 | Itpr1 | 5.66E-05 | 0.325794289 | 0.744 | 0.663 | 1 | Endocelia |
| Selenot | Selenot | 5.72E-05 | 0.441611509 | 0.295 | 0.212 | 1 | Endocelia |
| Stat32 | Stat3 | 5.89E-05 | 0.382539555 | 0.305 | 0.22 | 1 | Endocelia |
| Aldoa2 | Aldoa | 6.01E-05 | 0.521063835 | 0.407 | 0.332 | 1 | Endocelia |
| Adk1 | Adk | 6.09E-05 | 0.594467868 | 0.596 | 0.524 | 1 | Endocelia |
| Sptan11 | Sptan1 | 6.21E-05 | 0.449196376 | 0.628 | 0.612 | 1 | Endocelia |
| Eif4h | Eif4h | 6.84E-05 | 0.404920024 | 0.396 | 0.307 | 1 | Endocelia |
| Reck | Reck | 6.92E-05 | 0.476378124 | 0.361 | 0.268 | 1 | Endocelia |
| H2afz | H2afz | 7.24E-05 | 0.42374705 | 0.284 | 0.202 | 1 | Endocelia |
| Zfand64 | Zfand6 | 7.28E-05 | 0.373758002 | 0.389 | 0.296 | 1 | Endocelia |
| Tmem184b | Tmem184b | 7.99E-05 | 0.356705947 | 0.281 | 0.193 | 1 | Endocelia |
| Ak3 | Ak3 | 9.87E-05 | 0.409215548 | 0.267 | 0.187 | 1 | Endocelia |
| Ybx1 | Ybx1 | 0.00010444 | 0.493425716 | 0.379 | 0.306 | 1 | Endocelia |
| Git21 | Git2 | 0.000109369 | 0.42456909 | 0.418 | 0.332 | 1 | Endocelia |
| Grk51 | Grk5 | 0.00010971 | 0.599382055 | 0.344 | 0.271 | 1 | Endocelia |
| Sp3 | Sp3 | 0.00012321 | 0.403660879 | 0.372 | 0.292 | 1 | Endocelia |
| Gab22 | Gab2 | 0.000124141 | 0.577456872 | 0.523 | 0.466 | 1 | Endocelia |
| BC031181 | BC031181 | 0.000126695 | 0.484430605 | 0.267 | 0.187 | 1 | Endocelia |
| Slc25a3 | Slc25a3 | 0.000127788 | 0.479821182 | 0.449 | 0.379 | 1 | Endocelia |
| Pkm1 | Pkm | 0.00013337 | 0.519896488 | 0.498 | 0.439 | 1 | Endocelia |
| Map4k3 | Map4k3 | 0.000138367 | 0.410724383 | 0.46 | 0.384 | 1 | Endocelia |
| Ywhaz1 | Ywhaz | 0.000143608 | 0.420143698 | 0.649 | 0.636 | 1 | Endocelia |
| Dgkh1 | Dgkh | 0.000147153 | 0.348770469 | 0.663 | 0.611 | 1 | Endocelia |
| Hnrnph11 | Hnrnph1 | 0.000147647 | 0.451476213 | 0.488 | 0.413 | 1 | Endocelia |
| Lrch11 | Lrch1 | 0.000151445 | 0.606203218 | 0.561 | 0.5 | 1 | Endocelia |
| Tor1aip12 | Tor1aip1 | 0.000157232 | 0.259585346 | 0.302 | 0.212 | 1 | Endocelia |
| Atp2a21 | Atp2a2 | 0.000158792 | 0.50545679 | 0.719 | 0.692 | 1 | Endocelia |
| Klf91 | Klf9 | 0.000173615 | 0.404368498 | 0.446 | 0.375 | 1 | Endocelia |
| Cpd1 | Cpd | 0.000178705 | 0.414659614 | 0.411 | 0.34 | 1 | Endocelia |
| Arf5 | Arf5 | 0.00018972 | 0.452339351 | 0.298 | 0.222 | 1 | Endocelia |
| Lpp3 | Lpp | 0.000192478 | 0.447561834 | 0.442 | 0.375 | 1 | Endocelia |
| Gnb42 | Gnb4 | 0.000214679 | 0.408622172 | 0.319 | 0.237 | 1 | Endocelia |
| Capza21 | Capza2 | 0.000221899 | 0.398345289 | 0.386 | 0.307 | 1 | Endocelia |
| Serinc12 | Serinc1 | 0.000243759 | 0.469533065 | 0.582 | 0.539 | 1 | Endocelia |
| Ywhab1 | Ywhab | 0.000246393 | 0.488418044 | 0.396 | 0.321 | 1 | Endocelia |
| Siah1a | Siah1a | 0.000270398 | 0.320907403 | 0.281 | 0.205 | 1 | Endocelia |
| Rgs4 | Rgs4 | 0.000298509 | 0.504991755 | 0.284 | 0.215 | 1 | Endocelia |
| Calm23 | Calm2 | 0.000299912 | 0.426620979 | 0.807 | 0.809 | 1 | Endocelia |
| Peli12 | Peli1 | 0.00030464 | 0.574100304 | 0.519 | 0.484 | 1 | Endocelia |
| Fbxl3 | Fbxl3 | 0.000315989 | 0.261302898 | 0.344 | 0.257 | 1 | Endocelia |
| Slc16a21 | Slc16a2 | 0.000328577 | 0.623414132 | 0.365 | 0.306 | 1 | Endocelia |
| Hsp90b1 | Hsp90b1 | 0.000350308 | 0.50754476 | 0.386 | 0.32 | 1 | Endocelia |
| Xiap2 | Xiap | 0.000375194 | 0.487524244 | 0.396 | 0.331 | 1 | Endocelia |
| Rybp1 | Rybp | 0.000396043 | 0.416215944 | 0.386 | 0.314 | 1 | Endocelia |
| Nrp11 | Nrp1 | 0.000489595 | 0.408463878 | 0.288 | 0.216 | 1 | Endocelia |
| Sorbs21 | Sorbs2 | 0.000517334 | 0.411092153 | 0.733 | 0.73 | 1 | Endocelia |
| Hipk31 | Hipk3 | 0.000581899 | 0.412123318 | 0.372 | 0.298 | 1 | Endocelia |
| Rbfox21 | Rbfox2 | 0.000585389 | 0.312905532 | 0.765 | 0.744 | 1 | Endocelia |
| Mdh2 | Mdh2 | 0.000586594 | 0.300506922 | 0.291 | 0.214 | 1 | Endocelia |
| Mpp71 | Mpp7 | 0.000601379 | 0.372357905 | 0.428 | 0.349 | 1 | Endocelia |
| Ube2d31 | Ube2d3 | 0.000605374 | 0.464240948 | 0.509 | 0.464 | 1 | Endocelia |
| Gulp11 | Gulp1 | 0.000646849 | 0.413852123 | 0.467 | 0.396 | 1 | Endocelia |
| Rab11a1 | Rab11a | 0.000687137 | 0.306034014 | 0.253 | 0.184 | 1 | Endocelia |
| Slc10a7 | Slc10a7 | 0.000692304 | 0.418222774 | 0.291 | 0.219 | 1 | Endocelia |
| Ppp1r10 | Ppp1r10 | 0.000694939 | 0.310609081 | 0.302 | 0.224 | 1 | Endocelia |
| Srpr | Srpr | 0.000704737 | 0.411149935 | 0.295 | 0.23 | 1 | Endocelia |
| Eif4a1 | Eif4a1 | 0.00086983 | 0.481779388 | 0.284 | 0.219 | 1 | Endocelia |
| Arl152 | Arl15 | 0.00088374 | 0.643335389 | 0.716 | 0.736 | 1 | Endocelia |
| Slc1a12 | Slc1a1 | 0.00088555 | 0.560223508 | 0.421 | 0.373 | 1 | Endocelia |
| AY0361181 | AY036118 | 0.000947358 | 0.523443168 | 0.495 | 0.45 | 1 | Endocelia |
| Saraf | Saraf | 0.001039785 | 0.350180309 | 0.302 | 0.228 | 1 | Endocelia |
| Vdac2 | Vdac2 | 0.001046494 | 0.493028059 | 0.298 | 0.235 | 1 | Endocelia |
| Yy1 | Yy1 | 0.00112314 | 0.313415839 | 0.316 | 0.248 | 1 | Endocelia |
| Dnajc3 | Dnajc3 | 0.001124675 | 0.343910046 | 0.26 | 0.193 | 1 | Endocelia |
| Rab7 | Rab7 | 0.001151217 | 0.379046784 | 0.358 | 0.293 | 1 | Endocelia |
| Zmiz13 | Zmiz1 | 0.001192041 | 0.269989628 | 0.361 | 0.286 | 1 | Endocelia |
| Strn31 | Strn3 | 0.001239218 | 0.305633898 | 0.758 | 0.787 | 1 | Endocelia |
| Nr1d21 | Nr1d2 | 0.001380224 | 0.432408991 | 0.463 | 0.405 | 1 | Endocelia |
| Adam102 | Adam10 | 0.001391392 | 0.387057536 | 0.446 | 0.394 | 1 | Endocelia |
| 2900097C17Rik | 2900097C17Rik | 0.001482557 | 0.529680189 | 0.463 | 0.416 | 1 | Endocelia |
| Sh3glb11 | Sh3glb1 | 0.001538794 | 0.440354731 | 0.351 | 0.294 | 1 | Endocelia |
| Klf72 | Klf7 | 0.001569286 | 0.357298609 | 0.554 | 0.52 | 1 | Endocelia |
| Marcks3 | Marcks | 0.001653134 | 0.420919434 | 0.323 | 0.26 | 1 | Endocelia |
| Nck1 | Nck1 | 0.001675127 | 0.438252337 | 0.267 | 0.205 | 1 | Endocelia |
| Timp31 | Timp3 | 0.001752048 | 0.644065689 | 0.344 | 0.302 | 1 | Endocelia |
| Ubl3 | Ubl3 | 0.001876763 | 0.29236588 | 0.547 | 0.503 | 1 | Endocelia |
| Rab11b | Rab11b | 0.001901184 | 0.359415471 | 0.253 | 0.191 | 1 | Endocelia |
| Limch11 | Limch1 | 0.00203109 | 0.361208554 | 0.712 | 0.765 | 1 | Endocelia |
| Pten1 | Pten | 0.002044482 | 0.589561817 | 0.649 | 0.651 | 1 | Endocelia |
| Tle11 | Tle1 | 0.002130103 | 0.427874964 | 0.47 | 0.431 | 1 | Endocelia |
| Ppp1r9b | Ppp1r9b | 0.002158873 | 0.315176839 | 0.277 | 0.215 | 1 | Endocelia |
| Ppp1r22 | Ppp1r2 | 0.002259213 | 0.354267487 | 0.607 | 0.576 | 1 | Endocelia |
| E130308A19Rik2 | E130308A19Rik | 0.002260635 | 0.528505598 | 0.414 | 0.355 | 1 | Endocelia |
| Psap3 | Psap | 0.002292702 | 0.376349749 | 0.614 | 0.582 | 1 | Endocelia |
| Srgap21 | Srgap2 | 0.002400604 | 0.324438373 | 0.674 | 0.688 | 1 | Endocelia |
| Psmb1 | Psmb1 | 0.002401759 | 0.40762332 | 0.263 | 0.204 | 1 | Endocelia |
| Cr1l | Cr1l | 0.002466323 | 0.33660862 | 0.309 | 0.245 | 1 | Endocelia |
| Fbxl172 | Fbxl17 | 0.00247651 | 0.282111189 | 0.8 | 0.816 | 1 | Endocelia |
| Far21 | Far2 | 0.002540669 | 0.601329788 | 0.337 | 0.295 | 1 | Endocelia |
| Mprip1 | Mprip | 0.002546153 | 0.428665337 | 0.611 | 0.624 | 1 | Endocelia |
| Atp5b1 | Atp5b | 0.002598139 | 0.4705996 | 0.4 | 0.348 | 1 | Endocelia |
| Akt32 | Akt3 | 0.002752414 | 0.285314005 | 0.782 | 0.815 | 1 | Endocelia |
| Klf123 | Klf12 | 0.002762934 | 0.600795464 | 0.702 | 0.71 | 1 | Endocelia |
| Ap1s2 | Ap1s2 | 0.002806972 | 0.411109989 | 0.27 | 0.215 | 1 | Endocelia |
| Pcmtd1 | Pcmtd1 | 0.002845446 | 0.339846563 | 0.642 | 0.664 | 1 | Endocelia |
| Ccny | Ccny | 0.002989895 | 0.489703303 | 0.561 | 0.549 | 1 | Endocelia |
| Anp32a | Anp32a | 0.003136923 | 0.370965094 | 0.309 | 0.252 | 1 | Endocelia |
| Cnbp | Cnbp | 0.003480385 | 0.427524316 | 0.34 | 0.292 | 1 | Endocelia |
| Atp1a12 | Atp1a1 | 0.003487088 | 0.45952995 | 0.375 | 0.322 | 1 | Endocelia |
| Sox52 | Sox5 | 0.003509463 | 0.573718266 | 0.305 | 0.237 | 1 | Endocelia |
| Ywhae2 | Ywhae | 0.003545404 | 0.442989448 | 0.589 | 0.571 | 1 | Endocelia |
| Ppp2r5a1 | Ppp2r5a | 0.003580759 | 0.254447607 | 0.386 | 0.32 | 1 | Endocelia |
| Ptges3 | Ptges3 | 0.003712557 | 0.315523092 | 0.27 | 0.209 | 1 | Endocelia |
| Actr3 | Actr3 | 0.003760659 | 0.39488107 | 0.446 | 0.392 | 1 | Endocelia |
| Nipbl2 | Nipbl | 0.003897561 | 0.36824781 | 0.688 | 0.719 | 1 | Endocelia |
| Itm2c2 | Itm2c | 0.004092106 | 0.382869683 | 0.607 | 0.557 | 1 | Endocelia |
| Cuedc13 | Cuedc1 | 0.004202877 | 0.283185001 | 0.291 | 0.22 | 1 | Endocelia |
| Tax1bp11 | Tax1bp1 | 0.004209687 | 0.373006622 | 0.439 | 0.394 | 1 | Endocelia |
| Frmd61 | Frmd6 | 0.004263114 | 0.397755712 | 0.302 | 0.245 | 1 | Endocelia |
| Clip1 | Clip1 | 0.004288784 | 0.470548561 | 0.484 | 0.447 | 1 | Endocelia |
| Tmem591 | Tmem59 | 0.004414302 | 0.45543003 | 0.428 | 0.378 | 1 | Endocelia |
| Afdn | Afdn | 0.004498957 | 0.435481733 | 0.554 | 0.541 | 1 | Endocelia |
| Arpp19 | Arpp19 | 0.004747622 | 0.594856919 | 0.477 | 0.441 | 1 | Endocelia |
| Scarb1 | Scarb1 | 0.004750633 | 0.338013235 | 0.284 | 0.232 | 1 | Endocelia |
| Cradd1 | Cradd | 0.004831592 | 0.303156067 | 0.302 | 0.24 | 1 | Endocelia |
| Sdcbp | Sdcbp | 0.004882433 | 0.388742081 | 0.281 | 0.229 | 1 | Endocelia |
| 21-Mar | 2-Mar | 0.005153138 | 0.374476898 | 0.323 | 0.268 | 1 | Endocelia |
| Scaf112 | Scaf11 | 0.00515535 | 0.268845383 | 0.375 | 0.315 | 1 | Endocelia |
| Ensa | Ensa | 0.00530512 | 0.327428387 | 0.298 | 0.242 | 1 | Endocelia |
| Atp11c1 | Atp11c | 0.005480646 | 0.431607482 | 0.432 | 0.384 | 1 | Endocelia |
| Farp12 | Farp1 | 0.005502679 | 0.263495171 | 0.386 | 0.322 | 1 | Endocelia |
| Cd2ap | Cd2ap | 0.005592406 | 0.517076907 | 0.477 | 0.466 | 1 | Endocelia |
| Tubb5 | Tubb5 | 0.005664145 | 0.388481155 | 0.256 | 0.201 | 1 | Endocelia |
| Stx12 | Stx12 | 0.005944952 | 0.28537411 | 0.295 | 0.241 | 1 | Endocelia |
| Zbtb381 | Zbtb38 | 0.005963299 | 0.421666248 | 0.456 | 0.401 | 1 | Endocelia |
| Eif4a21 | Eif4a2 | 0.006027836 | 0.522716742 | 0.414 | 0.372 | 1 | Endocelia |
| Pcca | Pcca | 0.006199813 | 0.49644212 | 0.582 | 0.576 | 1 | Endocelia |
| Pmepa11 | Pmepa1 | 0.006794085 | 0.41145111 | 0.404 | 0.358 | 1 | Endocelia |
| Nckap11 | Nckap1 | 0.006935716 | 0.293013556 | 0.719 | 0.734 | 1 | Endocelia |
| Jmy1 | Jmy | 0.007185586 | 0.364441893 | 0.319 | 0.269 | 1 | Endocelia |
| Arid21 | Arid2 | 0.007275993 | 0.279653662 | 0.477 | 0.425 | 1 | Endocelia |
| Rictor2 | Rictor | 0.007463749 | 0.254880761 | 0.537 | 0.5 | 1 | Endocelia |
| Stag2 | Stag2 | 0.007551374 | 0.349697297 | 0.491 | 0.458 | 1 | Endocelia |
| Nfat51 | Nfat5 | 0.007589078 | 0.333601727 | 0.677 | 0.706 | 1 | Endocelia |
| Csde1 | Csde1 | 0.007987803 | 0.355023532 | 0.453 | 0.413 | 1 | Endocelia |
| Rpl6 | Rpl6 | 0.008036503 | 0.311302457 | 0.263 | 0.209 | 1 | Endocelia |
| Dennd2a1 | Dennd2a | 0.00825715 | 0.4582587 | 0.277 | 0.222 | 1 | Endocelia |
| Gdi21 | Gdi2 | 0.008509957 | 0.3061329 | 0.404 | 0.346 | 1 | Endocelia |
| Gpr883 | Gpr88 | 0.00891018 | 0.551987491 | 0.579 | 0.567 | 1 | Endocelia |
| Ptp4a21 | Ptp4a2 | 0.008939274 | 0.329948674 | 0.421 | 0.367 | 1 | Endocelia |
| 1700007G11Rik | 1700007G11Rik | 0 | 5.14548572 | 1 | 0.02 | 0 | Ependymal |
| Spag16 | Spag16 | 0 | 4.573392431 | 1 | 0.055 | 0 | Ependymal |
| Dnah12 | Dnah12 | 0 | 4.547952453 | 1 | 0.012 | 0 | Ependymal |
| Adamts20 | Adamts20 | 0 | 4.354553266 | 0.987 | 0.097 | 0 | Ependymal |
| Wdr49 | Wdr49 | 0 | 3.858791867 | 0.955 | 0.017 | 0 | Ependymal |
| Rgs22 | Rgs22 | 0 | 3.830539182 | 0.949 | 0.025 | 0 | Ependymal |
| Ccdc162 | Ccdc162 | 0 | 3.630047726 | 0.987 | 0.07 | 0 | Ependymal |
| Gm13481 | Gm13481 | 0 | 3.625278891 | 0.942 | 0.049 | 0 | Ependymal |
| Tmem212 | Tmem212 | 0 | 3.58872282 | 0.955 | 0.008 | 0 | Ependymal |
| Hydin | Hydin | 0 | 3.574973924 | 0.955 | 0.016 | 0 | Ependymal |
| Dnah9 | Dnah9 | 0 | 3.548313066 | 0.962 | 0.045 | 0 | Ependymal |
| C230072F16Rik | C230072F16Rik | 0 | 3.481846818 | 0.981 | 0.007 | 0 | Ependymal |
| Dnah6 | Dnah6 | 0 | 3.46006898 | 0.962 | 0.017 | 0 | Ependymal |
| Cfap61 | Cfap61 | 0 | 3.451681068 | 0.949 | 0.046 | 0 | Ependymal |
| Spef2 | Spef2 | 0 | 3.450986515 | 0.981 | 0.047 | 0 | Ependymal |
| 3300002A11Rik | 3300002A11Rik | 0 | 3.415611051 | 0.968 | 0.043 | 0 | Ependymal |
| Gm10714 | Gm10714 | 0 | 3.414927983 | 0.897 | 0.008 | 0 | Ependymal |
| Spag17 | Spag17 | 0 | 3.378473778 | 0.923 | 0.015 | 0 | Ependymal |
| 9530026P05Rik1 | 9530026P05Rik | 0 | 3.362084634 | 0.962 | 0.084 | 0 | Ependymal |
| Ccdc170 | Ccdc170 | 0 | 3.333533174 | 0.968 | 0.015 | 0 | Ependymal |
| Dnah11 | Dnah11 | 0 | 3.32130814 | 0.974 | 0.03 | 0 | Ependymal |
| Cfap44 | Cfap44 | 0 | 3.316079578 | 0.974 | 0.069 | 0 | Ependymal |
| Lrriq1 | Lrriq1 | 0 | 3.184954901 | 0.917 | 0.065 | 0 | Ependymal |
| Ccdc146 | Ccdc146 | 0 | 3.174399418 | 0.923 | 0.01 | 0 | Ependymal |
| Unc5cl | Unc5cl | 0 | 3.170974716 | 0.897 | 0.002 | 0 | Ependymal |
| Ak7 | Ak7 | 0 | 3.161285676 | 0.949 | 0.026 | 0 | Ependymal |
| Cfap43 | Cfap43 | 0 | 3.093176452 | 0.949 | 0.024 | 0 | Ependymal |
| Lrrc36 | Lrrc36 | 0 | 3.08764191 | 0.929 | 0.005 | 0 | Ependymal |
| Ak9 | Ak9 | 0 | 3.058133131 | 0.91 | 0.03 | 0 | Ependymal |
| Dnah3 | Dnah3 | 0 | 3.046546699 | 0.929 | 0.02 | 0 | Ependymal |
| Spata17 | Spata17 | 0 | 3.034696226 | 0.949 | 0.029 | 0 | Ependymal |
| Lmntd1 | Lmntd1 | 0 | 3.002684085 | 0.878 | 0.025 | 0 | Ependymal |
| Dnah5 | Dnah5 | 0 | 3.000804285 | 0.91 | 0.022 | 0 | Ependymal |
| Gm9731 | Gm973 | 0 | 2.948366763 | 0.987 | 0.094 | 0 | Ependymal |
| Vwa3a | Vwa3a | 0 | 2.904091337 | 0.923 | 0.02 | 0 | Ependymal |
| Adgrv11 | Adgrv1 | 0 | 2.887600617 | 0.936 | 0.071 | 0 | Ependymal |
| Armc4 | Armc4 | 0 | 2.84846027 | 0.878 | 0.012 | 0 | Ependymal |
| Ddo1 | Ddo | 0 | 2.774146401 | 0.917 | 0.061 | 0 | Ependymal |
| Ttc29 | Ttc29 | 0 | 2.770460934 | 0.891 | 0.006 | 0 | Ependymal |
| Dthd1 | Dthd1 | 0 | 2.761562845 | 0.891 | 0.003 | 0 | Ependymal |
| Zbbx | Zbbx | 0 | 2.755554715 | 0.878 | 0.04 | 0 | Ependymal |
| Fbxl13 | Fbxl13 | 0 | 2.683621505 | 0.853 | 0.018 | 0 | Ependymal |
| Gm48761 | Gm4876 | 0 | 2.646653495 | 0.91 | 0.074 | 0 | Ependymal |
| Cdhr3 | Cdhr3 | 0 | 2.62663411 | 0.821 | 0.008 | 0 | Ependymal |
| Dnah7b | Dnah7b | 0 | 2.574465306 | 0.897 | 0.07 | 0 | Ependymal |
| Frmpd2 | Frmpd2 | 0 | 2.564926086 | 0.84 | 0.004 | 0 | Ependymal |
| Shroom3 | Shroom3 | 0 | 2.531746501 | 0.814 | 0.06 | 0 | Ependymal |
| Tmem232 | Tmem232 | 0 | 2.5306732 | 0.821 | 0.035 | 0 | Ependymal |
| Ankub11 | Ankub1 | 0 | 2.475562555 | 0.885 | 0.058 | 0 | Ependymal |
| Rassf9 | Rassf9 | 0 | 2.430428524 | 0.821 | 0.006 | 0 | Ependymal |
| Dnah7a | Dnah7a | 0 | 2.416770743 | 0.821 | 0.024 | 0 | Ependymal |
| Wdr63 | Wdr63 | 0 | 2.389539157 | 0.827 | 0.004 | 0 | Ependymal |
| Iqck | Iqck | 0 | 2.360256124 | 0.872 | 0.069 | 0 | Ependymal |
| Armc3 | Armc3 | 0 | 2.326161805 | 0.808 | 0.013 | 0 | Ependymal |
| Plch1 | Plch1 | 0 | 2.313633979 | 0.827 | 0.061 | 0 | Ependymal |
| Lrguk | Lrguk | 0 | 2.295289973 | 0.846 | 0.052 | 0 | Ependymal |
| Nek11 | Nek11 | 0 | 2.293542915 | 0.827 | 0.049 | 0 | Ependymal |
| Stk331 | Stk33 | 0 | 2.291971664 | 0.833 | 0.051 | 0 | Ependymal |
| Ttll8 | Ttll8 | 0 | 2.269503578 | 0.853 | 0.028 | 0 | Ependymal |
| Dnah7c | Dnah7c | 0 | 2.265756669 | 0.756 | 0.054 | 0 | Ependymal |
| Stpg1 | Stpg1 | 0 | 2.255162591 | 0.833 | 0.022 | 0 | Ependymal |
| Wdr66 | Wdr66 | 0 | 2.24610346 | 0.872 | 0.036 | 0 | Ependymal |
| Tm4sf1 | Tm4sf1 | 0 | 2.245212602 | 0.821 | 0.015 | 0 | Ependymal |
| Dnah10 | Dnah10 | 0 | 2.23132884 | 0.801 | 0.012 | 0 | Ependymal |
| Adgb | Adgb | 0 | 2.212403312 | 0.808 | 0.015 | 0 | Ependymal |
| Ccdc180 | Ccdc180 | 0 | 2.205500198 | 0.763 | 0.002 | 0 | Ependymal |
| Gm47888 | Gm47888 | 0 | 2.203431686 | 0.718 | 0.003 | 0 | Ependymal |
| Cfap65 | Cfap65 | 0 | 2.192969542 | 0.821 | 0.014 | 0 | Ependymal |
| Lrrc9 | Lrrc9 | 0 | 2.173171073 | 0.853 | 0.068 | 0 | Ependymal |
| Efcab11 | Efcab11 | 0 | 2.156984798 | 0.686 | 0.018 | 0 | Ependymal |
| Ect2l | Ect2l | 0 | 2.151882977 | 0.801 | 0.006 | 0 | Ependymal |
| Fhad1 | Fhad1 | 0 | 2.149815351 | 0.801 | 0.018 | 0 | Ependymal |
| Efhb | Efhb | 0 | 2.123755796 | 0.795 | 0.021 | 0 | Ependymal |
| Daw1 | Daw1 | 0 | 2.061210074 | 0.769 | 0.004 | 0 | Ependymal |
| Ttc21a | Ttc21a | 0 | 2.055776022 | 0.75 | 0.008 | 0 | Ependymal |
| Bbox1 | Bbox1 | 0 | 2.038669682 | 0.782 | 0.02 | 0 | Ependymal |
| Vit | Vit | 0 | 2.006680687 | 0.808 | 0.039 | 0 | Ependymal |
| Dnaic1 | Dnaic1 | 0 | 1.987988868 | 0.763 | 0.032 | 0 | Ependymal |
| Ccdc114 | Ccdc114 | 0 | 1.985501676 | 0.782 | 0.023 | 0 | Ependymal |
| Maats1 | Maats1 | 0 | 1.965340169 | 0.776 | 0.014 | 0 | Ependymal |
| Zfp474 | Zfp474 | 0 | 1.932128259 | 0.756 | 0.001 | 0 | Ependymal |
| Iqca | Iqca | 0 | 1.926914658 | 0.724 | 0.005 | 0 | Ependymal |
| Cfap52 | Cfap52 | 0 | 1.905691244 | 0.724 | 0.005 | 0 | Ependymal |
| Ccdc153 | Ccdc153 | 0 | 1.903320192 | 0.744 | 0.008 | 0 | Ependymal |
| Fam216b | Fam216b | 0 | 1.871550325 | 0.712 | 0.002 | 0 | Ependymal |
| Cfap70 | Cfap70 | 0 | 1.863959391 | 0.744 | 0.022 | 0 | Ependymal |
| Enkur | Enkur | 0 | 1.85175544 | 0.75 | 0.018 | 0 | Ependymal |
| Pawr | Pawr | 0 | 1.843857018 | 0.654 | 0.025 | 0 | Ependymal |
| Rfx2 | Rfx2 | 0 | 1.837136498 | 0.731 | 0.046 | 0 | Ependymal |
| Cfap100 | Cfap100 | 0 | 1.809155762 | 0.673 | 0.013 | 0 | Ependymal |
| Cfap206 | Cfap206 | 0 | 1.790844691 | 0.724 | 0.026 | 0 | Ependymal |
| Gm867 | Gm867 | 0 | 1.781597387 | 0.692 | 0.011 | 0 | Ependymal |
| Gm29266 | Gm29266 | 0 | 1.775483042 | 0.609 | 0.02 | 0 | Ependymal |
| 1700028P14Rik | 1700028P14Rik | 0 | 1.771739204 | 0.641 | 0.004 | 0 | Ependymal |
| Mlf1 | Mlf1 | 0 | 1.756774931 | 0.686 | 0.008 | 0 | Ependymal |
| Iqcg | Iqcg | 0 | 1.754799833 | 0.712 | 0.032 | 0 | Ependymal |
| Cphx3 | Cphx3 | 0 | 1.732866232 | 0.622 | 0.007 | 0 | Ependymal |
| Vwa3b | Vwa3b | 0 | 1.721409968 | 0.692 | 0.021 | 0 | Ependymal |
| Lrrc71 | Lrrc71 | 0 | 1.690480097 | 0.705 | 0.003 | 0 | Ependymal |
| Spata6 | Spata6 | 0 | 1.685148755 | 0.712 | 0.044 | 0 | Ependymal |
| Cfap221 | Cfap221 | 0 | 1.67837634 | 0.718 | 0.015 | 0 | Ependymal |
| Mamdc2 | Mamdc2 | 0 | 1.663955222 | 0.545 | 0.011 | 0 | Ependymal |
| 4833427G06Rik | 4833427G06Rik | 0 | 1.657119611 | 0.635 | 0.001 | 0 | Ependymal |
| Lrrc74b | Lrrc74b | 0 | 1.643980032 | 0.673 | 0.004 | 0 | Ependymal |
| Dpy19l2 | Dpy19l2 | 0 | 1.606713108 | 0.596 | 0.005 | 0 | Ependymal |
| Col6a5 | Col6a5 | 0 | 1.605181582 | 0.494 | 0.009 | 0 | Ependymal |
| Lrrc43 | Lrrc43 | 0 | 1.584545135 | 0.59 | 0.003 | 0 | Ependymal |
| Fam149a | Fam149a | 0 | 1.581258276 | 0.635 | 0.015 | 0 | Ependymal |
| Gm12695 | Gm12695 | 0 | 1.580621065 | 0.506 | 0.002 | 0 | Ependymal |
| Acss3 | Acss3 | 0 | 1.57989816 | 0.583 | 0.018 | 0 | Ependymal |
| Rbpms1 | Rbpms | 0 | 1.579871987 | 0.603 | 0.017 | 0 | Ependymal |
| Ccdc81 | Ccdc81 | 0 | 1.566960039 | 0.622 | 0.021 | 0 | Ependymal |
| Dnaaf3 | Dnaaf3 | 0 | 1.562578404 | 0.609 | 0.002 | 0 | Ependymal |
| 4932443I19Rik | 4932443I19Rik | 0 | 1.55989586 | 0.66 | 0.025 | 0 | Ependymal |
| Bace2 | Bace2 | 0 | 1.556770373 | 0.558 | 0.027 | 0 | Ependymal |
| Ccdc3 | Ccdc3 | 0 | 1.542034454 | 0.538 | 0.012 | 0 | Ependymal |
| Vwa5b1 | Vwa5b1 | 0 | 1.536971226 | 0.603 | 0.017 | 0 | Ependymal |
| Foxj1 | Foxj1 | 0 | 1.533903042 | 0.603 | 0.012 | 0 | Ependymal |
| Gm16499 | Gm16499 | 0 | 1.529352727 | 0.551 | 0.011 | 0 | Ependymal |
| Dynlrb2 | Dynlrb2 | 0 | 1.510187852 | 0.603 | 0.004 | 0 | Ependymal |
| Meig1 | Meig1 | 0 | 1.505062725 | 0.583 | 0.021 | 0 | Ependymal |
| Aebp1 | Aebp1 | 0 | 1.498710957 | 0.609 | 0.012 | 0 | Ependymal |
| Gm45783 | Gm45783 | 0 | 1.490554328 | 0.34 | 0.001 | 0 | Ependymal |
| Casc1 | Casc1 | 0 | 1.484197263 | 0.564 | 0.011 | 0 | Ependymal |
| Fam47e | Fam47e | 0 | 1.461217803 | 0.538 | 0.002 | 0 | Ependymal |
| Crocc2 | Crocc2 | 0 | 1.450460174 | 0.577 | 0.002 | 0 | Ependymal |
| Rsph4a | Rsph4a | 0 | 1.435574024 | 0.577 | 0.007 | 0 | Ependymal |
| Eno4 | Eno4 | 0 | 1.433168245 | 0.571 | 0.027 | 0 | Ependymal |
| Lrrc23 | Lrrc23 | 0 | 1.424767534 | 0.628 | 0.011 | 0 | Ependymal |
| Rp1 | Rp1 | 0 | 1.412697062 | 0.474 | 0.007 | 0 | Ependymal |
| Crb2 | Crb2 | 0 | 1.382631676 | 0.615 | 0.009 | 0 | Ependymal |
| Cd24a | Cd24a | 0 | 1.362245096 | 0.538 | 0.014 | 0 | Ependymal |
| Mapk15 | Mapk15 | 0 | 1.353046988 | 0.583 | 0.005 | 0 | Ependymal |
| Sntn | Sntn | 0 | 1.346081498 | 0.5 | 0.002 | 0 | Ependymal |
| Ak8 | Ak8 | 0 | 1.335718813 | 0.59 | 0.017 | 0 | Ependymal |
| Gm29571 | Gm29571 | 0 | 1.327165023 | 0.538 | 0.01 | 0 | Ependymal |
| Nek5 | Nek5 | 0 | 1.316569101 | 0.526 | 0.005 | 0 | Ependymal |
| Ttll6 | Ttll6 | 0 | 1.307428816 | 0.526 | 0.001 | 0 | Ependymal |
| Wdr93 | Wdr93 | 0 | 1.2873921 | 0.551 | 0.005 | 0 | Ependymal |
| Tctex1d4 | Tctex1d4 | 0 | 1.286212516 | 0.545 | 0.003 | 0 | Ependymal |
| Col8a2 | Col8a2 | 0 | 1.280732082 | 0.494 | 0.003 | 0 | Ependymal |
| Ppp1r36 | Ppp1r36 | 0 | 1.260567908 | 0.526 | 0.005 | 0 | Ependymal |
| Spata18 | Spata18 | 0 | 1.253146518 | 0.5 | 0.001 | 0 | Ependymal |
| Dnali1 | Dnali1 | 0 | 1.233066344 | 0.494 | 0.003 | 0 | Ependymal |
| Gm28729 | Gm28729 | 0 | 1.229277675 | 0.526 | 0.002 | 0 | Ependymal |
| Gm16365 | Gm16365 | 0 | 1.219069578 | 0.526 | 0.02 | 0 | Ependymal |
| Celsr1 | Celsr1 | 0 | 1.216728662 | 0.551 | 0.024 | 0 | Ependymal |
| Ccdc40 | Ccdc40 | 0 | 1.209407333 | 0.538 | 0.019 | 0 | Ependymal |
| Lbp | Lbp | 0 | 1.200208629 | 0.487 | 0.005 | 0 | Ependymal |
| Trp63 | Trp63 | 0 | 1.187518085 | 0.333 | 0.005 | 0 | Ependymal |
| Lrp2 | Lrp2 | 0 | 1.182275736 | 0.494 | 0.003 | 0 | Ependymal |
| Ptpn14 | Ptpn14 | 0 | 1.146505823 | 0.506 | 0.018 | 0 | Ependymal |
| Iqcd | Iqcd | 0 | 1.136943771 | 0.423 | 0.012 | 0 | Ependymal |
| Cfap45 | Cfap45 | 0 | 1.134201912 | 0.494 | 0.017 | 0 | Ependymal |
| Efhc1 | Efhc1 | 0 | 1.132722206 | 0.468 | 0.008 | 0 | Ependymal |
| Tsnaxip1 | Tsnaxip1 | 0 | 1.131389709 | 0.513 | 0.017 | 0 | Ependymal |
| Cfap161 | Cfap161 | 0 | 1.129806767 | 0.506 | 0.009 | 0 | Ependymal |
| Drc7 | Drc7 | 0 | 1.128564295 | 0.513 | 0.005 | 0 | Ependymal |
| Cfap53 | Cfap53 | 0 | 1.1276051 | 0.436 | 0.015 | 0 | Ependymal |
| Fbln7 | Fbln7 | 0 | 1.123454942 | 0.391 | 0.004 | 0 | Ependymal |
| Ttc12 | Ttc12 | 0 | 1.114402891 | 0.481 | 0.018 | 0 | Ependymal |
| Gm19935 | Gm19935 | 0 | 1.108692743 | 0.474 | 0.006 | 0 | Ependymal |
| Nme9 | Nme9 | 0 | 1.098445157 | 0.487 | 0.004 | 0 | Ependymal |
| Tctex1d1 | Tctex1d1 | 0 | 1.092987333 | 0.442 | 0.008 | 0 | Ependymal |
| Ocln | Ocln | 0 | 1.083596027 | 0.468 | 0.011 | 0 | Ependymal |
| Gm1661 | Gm1661 | 0 | 1.080517587 | 0.455 | 0.005 | 0 | Ependymal |
| Scn7a | Scn7a | 0 | 1.078011426 | 0.474 | 0.012 | 0 | Ependymal |
| Uox | Uox | 0 | 1.03886061 | 0.417 | 0.001 | 0 | Ependymal |
| Mycbpap | Mycbpap | 0 | 1.036657264 | 0.474 | 0.007 | 0 | Ependymal |
| Trp73 | Trp73 | 0 | 1.034117833 | 0.436 | 0.004 | 0 | Ependymal |
| Mdh1b | Mdh1b | 0 | 1.033490096 | 0.423 | 0.013 | 0 | Ependymal |
| Asb14 | Asb14 | 0 | 1.032835315 | 0.462 | 0.015 | 0 | Ependymal |
| Ankrd66 | Ankrd66 | 0 | 1.032219844 | 0.455 | 0.001 | 0 | Ependymal |
| Layn | Layn | 0 | 1.029974207 | 0.346 | 0.005 | 0 | Ependymal |
| Ube2u | Ube2u | 0 | 1.020657705 | 0.442 | 0.003 | 0 | Ependymal |
| Anxa2 | Anxa2 | 0 | 1.005016718 | 0.449 | 0.01 | 0 | Ependymal |
| Cfap126 | Cfap126 | 0 | 1.00386594 | 0.436 | 0.007 | 0 | Ependymal |
| Gm36908 | Gm36908 | 0 | 1.001965738 | 0.442 | 0.005 | 0 | Ependymal |
| Fam81b | Fam81b | 0 | 1.001340157 | 0.34 | 0.003 | 0 | Ependymal |
| Jhy | Jhy | 0 | 1.000924601 | 0.436 | 0.003 | 0 | Ependymal |
| Tekt1 | Tekt1 | 0 | 0.983855763 | 0.429 | 0.005 | 0 | Ependymal |
| 4930567H12Rik | 4930567H12Rik | 0 | 0.98211568 | 0.365 | 0 | 0 | Ependymal |
| Cd109 | Cd109 | 0 | 0.972381707 | 0.41 | 0.006 | 0 | Ependymal |
| Barx2 | Barx2 | 0 | 0.961244874 | 0.321 | 0.005 | 0 | Ependymal |
| Dlec1 | Dlec1 | 0 | 0.959777185 | 0.455 | 0.008 | 0 | Ependymal |
| Sap30bpos | Sap30bpos | 0 | 0.945959298 | 0.41 | 0.013 | 0 | Ependymal |
| Tcte1 | Tcte1 | 0 | 0.944863044 | 0.429 | 0.002 | 0 | Ependymal |
| Capsl | Capsl | 0 | 0.938325138 | 0.365 | 0.005 | 0 | Ependymal |
| Sctr | Sctr | 0 | 0.936297296 | 0.372 | 0.005 | 0 | Ependymal |
| Pih1d2 | Pih1d2 | 0 | 0.927498225 | 0.417 | 0.012 | 0 | Ependymal |
| Kcnmb1 | Kcnmb1 | 0 | 0.921084383 | 0.365 | 0.004 | 0 | Ependymal |
| Pi15 | Pi15 | 0 | 0.903207457 | 0.372 | 0.004 | 0 | Ependymal |
| Car9 | Car9 | 0 | 0.894467882 | 0.385 | 0.006 | 0 | Ependymal |
| Catip | Catip | 0 | 0.893184685 | 0.385 | 0.006 | 0 | Ependymal |
| Pih1h3b | Pih1h3b | 0 | 0.884989401 | 0.333 | 0.001 | 0 | Ependymal |
| Prelp | Prelp | 0 | 0.881226672 | 0.365 | 0.009 | 0 | Ependymal |
| 1700012B09Rik | 1700012B09Rik | 0 | 0.879634686 | 0.391 | 0.003 | 0 | Ependymal |
| Gm15587 | Gm15587 | 0 | 0.868540867 | 0.365 | 0.01 | 0 | Ependymal |
| 2410004P03Rik | 2410004P03Rik | 0 | 0.857665065 | 0.404 | 0.003 | 0 | Ependymal |
| Morn3 | Morn3 | 0 | 0.85607346 | 0.385 | 0.004 | 0 | Ependymal |
| Usp43 | Usp43 | 0 | 0.841791895 | 0.34 | 0.002 | 0 | Ependymal |
| Cfap57 | Cfap57 | 0 | 0.840923131 | 0.365 | 0.006 | 0 | Ependymal |
| Prrg4 | Prrg4 | 0 | 0.833580334 | 0.359 | 0.008 | 0 | Ependymal |
| Gm29538 | Gm29538 | 0 | 0.8144553 | 0.372 | 0 | 0 | Ependymal |
| Dnaic2 | Dnaic2 | 0 | 0.812931844 | 0.346 | 0.009 | 0 | Ependymal |
| Rarres2 | Rarres2 | 0 | 0.809532188 | 0.359 | 0.005 | 0 | Ependymal |
| BC051019 | BC051019 | 0 | 0.786203763 | 0.333 | 0.001 | 0 | Ependymal |
| Hdc | Hdc | 0 | 0.765025462 | 0.295 | 0.005 | 0 | Ependymal |
| Pgpep1l | Pgpep1l | 0 | 0.745339523 | 0.308 | 0.007 | 0 | Ependymal |
| Scnn1a | Scnn1a | 0 | 0.743064486 | 0.34 | 0.006 | 0 | Ependymal |
| Traf1 | Traf1 | 0 | 0.732860847 | 0.321 | 0.002 | 0 | Ependymal |
| 1700016K19Rik | 1700016K19Rik | 0 | 0.730003545 | 0.327 | 0.003 | 0 | Ependymal |
| Fam167a | Fam167a | 0 | 0.72246637 | 0.359 | 0.008 | 0 | Ependymal |
| 1700001C02Rik | 1700001C02Rik | 0 | 0.715103625 | 0.327 | 0.001 | 0 | Ependymal |
| Ptpn20 | Ptpn20 | 0 | 0.707819278 | 0.288 | 0.001 | 0 | Ependymal |
| Cfap73 | Cfap73 | 0 | 0.706215855 | 0.327 | 0.003 | 0 | Ependymal |
| Odf3b | Odf3b | 0 | 0.702247763 | 0.301 | 0.001 | 0 | Ependymal |
| Lpar3 | Lpar3 | 0 | 0.69417387 | 0.295 | 0.002 | 0 | Ependymal |
| 1700007K13Rik | 1700007K13Rik | 0 | 0.672714533 | 0.301 | 0.004 | 0 | Ependymal |
| Cerkl | Cerkl | 0 | 0.664521051 | 0.301 | 0.006 | 0 | Ependymal |
| Folr1 | Folr1 | 0 | 0.652416133 | 0.256 | 0.002 | 0 | Ependymal |
| Irx5 | Irx5 | 0 | 0.634360358 | 0.256 | 0.001 | 0 | Ependymal |
| Cpn1 | Cpn1 | 0 | 0.634196304 | 0.25 | 0.002 | 0 | Ependymal |
| Slc43a3 | Slc43a3 | 0 | 0.624301407 | 0.256 | 0.002 | 0 | Ependymal |
| Slc26a3 | Slc26a3 | 0 | 0.619150332 | 0.263 | 0.003 | 0 | Ependymal |
| Dydc1 | Dydc1 | 0 | 0.615682488 | 0.263 | 0.001 | 0 | Ependymal |
| Gm48500 | Gm48500 | 0 | 0.613738951 | 0.269 | 0 | 0 | Ependymal |
| 1700024G13Rik | 1700024G13Rik | 0 | 0.602945925 | 0.256 | 0.002 | 0 | Ependymal |
| Deup1 | Deup1 | 0 | 0.598189407 | 0.314 | 0.007 | 0 | Ependymal |
| Cxcr4 | Cxcr4 | 0 | 0.577419336 | 0.256 | 0.002 | 0 | Ependymal |
| Lrrc34 | Lrrc34 | 0 | 0.57363272 | 0.256 | 0.002 | 0 | Ependymal |
| Caps2 | Caps2 | 0 | 0.554999368 | 0.25 | 0.003 | 0 | Ependymal |
| Gm44109 | Gm44109 | 0 | 0.513732982 | 0.25 | 0.001 | 0 | Ependymal |
| Sptlc3 | Sptlc3 | 1.58E-307 | 0.869971045 | 0.295 | 0.006 | 3.58E-303 | Ependymal |
| Cryzl2 | Cryzl2 | 3.58E-307 | 0.844720385 | 0.359 | 0.01 | 8.14E-303 | Ependymal |
| Fas | Fas | 1.33E-306 | 0.625811721 | 0.25 | 0.004 | 3.01E-302 | Ependymal |
| Gm14280 | Gm14280 | 6.80E-303 | 1.046466695 | 0.372 | 0.011 | 1.54E-298 | Ependymal |
| Rsph1 | Rsph1 | 2.85E-299 | 1.173373772 | 0.513 | 0.024 | 6.47E-295 | Ependymal |
| Myb | Myb | 3.13E-297 | 1.20710244 | 0.538 | 0.026 | 7.10E-293 | Ependymal |
| Ankfn11 | Ankfn1 | 4.34E-297 | 3.307280291 | 0.974 | 0.106 | 9.87E-293 | Ependymal |
| Cdk61 | Cdk6 | 3.14E-296 | 1.541768347 | 0.654 | 0.038 | 7.13E-292 | Ependymal |
| Styxl1 | Styxl1 | 3.40E-295 | 1.045275463 | 0.468 | 0.019 | 7.71E-291 | Ependymal |
| 4930523C07Rik | 4930523C07Rik | 1.05E-292 | 0.652178326 | 0.314 | 0.008 | 2.39E-288 | Ependymal |
| Pltp1 | Pltp | 1.54E-292 | 2.084103162 | 0.763 | 0.059 | 3.49E-288 | Ependymal |
| Vangl1 | Vangl1 | 3.66E-291 | 1.542391675 | 0.615 | 0.035 | 8.31E-287 | Ependymal |
| Gm17359 | Gm17359 | 9.38E-291 | 0.96991127 | 0.449 | 0.018 | 2.13E-286 | Ependymal |
| Cabcoco1 | Cabcoco1 | 1.48E-287 | 2.487870491 | 0.769 | 0.063 | 3.37E-283 | Ependymal |
| Calml4 | Calml4 | 4.61E-286 | 0.586457062 | 0.256 | 0.005 | 1.05E-281 | Ependymal |
| Col5a3 | Col5a3 | 2.08E-284 | 0.644504236 | 0.263 | 0.005 | 4.72E-280 | Ependymal |
| Saxo2 | Saxo2 | 1.02E-283 | 1.453896989 | 0.564 | 0.031 | 2.32E-279 | Ependymal |
| Npnt | Npnt | 1.33E-283 | 0.894502488 | 0.404 | 0.014 | 3.02E-279 | Ependymal |
| Ttc25 | Ttc25 | 7.56E-282 | 1.122831776 | 0.462 | 0.02 | 1.72E-277 | Ependymal |
| Aqp4 | Aqp4 | 1.36E-278 | 1.681472408 | 0.718 | 0.052 | 3.08E-274 | Ependymal |
| Myo7a | Myo7a | 1.86E-278 | 1.008268247 | 0.417 | 0.016 | 4.22E-274 | Ependymal |
| Map3k19 | Map3k19 | 2.56E-278 | 1.434272838 | 0.628 | 0.039 | 5.82E-274 | Ependymal |
| Gramd1c | Gramd1c | 1.48E-276 | 1.621061419 | 0.667 | 0.045 | 3.35E-272 | Ependymal |
| Riiad1 | Riiad1 | 2.17E-276 | 1.415776911 | 0.603 | 0.036 | 4.94E-272 | Ependymal |
| Pamr1 | Pamr1 | 6.17E-276 | 1.168593284 | 0.474 | 0.021 | 1.40E-271 | Ependymal |
| Afap1l21 | Afap1l2 | 5.72E-275 | 1.481605604 | 0.609 | 0.036 | 1.30E-270 | Ependymal |
| Itpkb1 | Itpkb | 2.08E-274 | 1.996241647 | 0.782 | 0.064 | 4.72E-270 | Ependymal |
| Epb41l4a | Epb41l4a | 5.00E-272 | 2.063073257 | 0.801 | 0.07 | 1.13E-267 | Ependymal |
| Gm28727 | Gm28727 | 6.20E-271 | 0.62909082 | 0.276 | 0.006 | 1.41E-266 | Ependymal |
| Vim | Vim | 3.82E-268 | 1.109957053 | 0.455 | 0.02 | 8.67E-264 | Ependymal |
| Csrp2 | Csrp2 | 1.13E-264 | 1.062111671 | 0.436 | 0.019 | 2.58E-260 | Ependymal |
| Ccbe1 | Ccbe1 | 1.89E-263 | 1.930289756 | 0.654 | 0.047 | 4.29E-259 | Ependymal |
| Ttll9 | Ttll9 | 2.13E-262 | 0.681508376 | 0.346 | 0.011 | 4.83E-258 | Ependymal |
| Kif61 | Kif6 | 2.42E-260 | 2.996398892 | 0.974 | 0.124 | 5.50E-256 | Ependymal |
| Gm16702 | Gm16702 | 3.81E-259 | 1.254560073 | 0.558 | 0.032 | 8.66E-255 | Ependymal |
| Cdkl4 | Cdkl4 | 9.84E-259 | 1.745862238 | 0.718 | 0.059 | 2.23E-254 | Ependymal |
| Rsph10b | Rsph10b | 1.65E-255 | 2.159645842 | 0.846 | 0.089 | 3.74E-251 | Ependymal |
| Dnah2 | Dnah2 | 6.90E-255 | 2.453358526 | 0.865 | 0.097 | 1.57E-250 | Ependymal |
| Nuf2 | Nuf2 | 1.32E-254 | 0.582990191 | 0.256 | 0.006 | 2.99E-250 | Ependymal |
| Slc14a2 | Slc14a2 | 6.93E-254 | 0.678163454 | 0.263 | 0.006 | 1.57E-249 | Ependymal |
| Slc25a18 | Slc25a18 | 1.45E-253 | 1.228046099 | 0.519 | 0.028 | 3.29E-249 | Ependymal |
| Togaram2 | Togaram2 | 1.73E-250 | 1.674426337 | 0.699 | 0.057 | 3.93E-246 | Ependymal |
| Glis31 | Glis3 | 1.43E-248 | 3.156179906 | 0.949 | 0.117 | 3.24E-244 | Ependymal |
| Lrrc51 | Lrrc51 | 2.24E-247 | 1.361357726 | 0.628 | 0.045 | 5.09E-243 | Ependymal |
| Fsip1 | Fsip1 | 1.05E-244 | 1.246550987 | 0.462 | 0.024 | 2.39E-240 | Ependymal |
| Cfap46 | Cfap46 | 2.82E-244 | 2.603741005 | 0.942 | 0.123 | 6.41E-240 | Ependymal |
| Ttc34 | Ttc34 | 7.78E-243 | 0.695843677 | 0.308 | 0.01 | 1.77E-238 | Ependymal |
| Ttll3 | Ttll3 | 1.36E-241 | 2.107088568 | 0.827 | 0.089 | 3.08E-237 | Ependymal |
| 6820408C15Rik | 6820408C15Rik | 1.93E-237 | 1.225301249 | 0.558 | 0.037 | 4.39E-233 | Ependymal |
| Zfp36l12 | Zfp36l1 | 1.52E-235 | 1.78412299 | 0.763 | 0.069 | 3.44E-231 | Ependymal |
| Ahnak1 | Ahnak | 8.20E-235 | 1.06374751 | 0.468 | 0.025 | 1.86E-230 | Ependymal |
| CT025548.2 | CT025548.2 | 3.34E-232 | 1.663279024 | 0.635 | 0.051 | 7.59E-228 | Ependymal |
| P2rx6 | P2rx6 | 4.61E-231 | 0.574453632 | 0.282 | 0.008 | 1.05E-226 | Ependymal |
| Map3k21 | Map3k21 | 3.03E-230 | 0.502847218 | 0.263 | 0.007 | 6.87E-226 | Ependymal |
| 1700088E04Rik | 1700088E04Rik | 2.57E-229 | 1.633143699 | 0.699 | 0.064 | 5.85E-225 | Ependymal |
| Ccdc60 | Ccdc60 | 6.52E-228 | 1.465669173 | 0.577 | 0.042 | 1.48E-223 | Ependymal |
| Ccdc150 | Ccdc150 | 1.01E-227 | 1.229806607 | 0.474 | 0.027 | 2.30E-223 | Ependymal |
| Ccdc190 | Ccdc190 | 4.08E-227 | 0.922651469 | 0.417 | 0.02 | 9.26E-223 | Ependymal |
| Antxr2 | Antxr2 | 2.72E-225 | 1.091427705 | 0.41 | 0.02 | 6.19E-221 | Ependymal |
| Gm7173 | Gm7173 | 6.57E-225 | 2.585444583 | 0.827 | 0.1 | 1.49E-220 | Ependymal |
| Kif9 | Kif9 | 5.06E-224 | 2.254262428 | 0.878 | 0.115 | 1.15E-219 | Ependymal |
| Col26a1 | Col26a1 | 3.28E-222 | 1.294988846 | 0.622 | 0.05 | 7.45E-218 | Ependymal |
| Wnt4 | Wnt4 | 3.38E-221 | 0.889446336 | 0.404 | 0.02 | 7.68E-217 | Ependymal |
| 5330413P13Rik | 5330413P13Rik | 4.88E-221 | 1.031693912 | 0.423 | 0.022 | 1.11E-216 | Ependymal |
| Cyp4v3 | Cyp4v3 | 1.65E-216 | 0.573728772 | 0.256 | 0.007 | 3.74E-212 | Ependymal |
| Gm16083 | Gm16083 | 5.69E-216 | 2.157158844 | 0.763 | 0.084 | 1.29E-211 | Ependymal |
| Ccdc113 | Ccdc113 | 9.44E-216 | 0.767616296 | 0.353 | 0.015 | 2.15E-211 | Ependymal |
| Mro | Mro | 1.88E-212 | 1.732230268 | 0.692 | 0.066 | 4.26E-208 | Ependymal |
| Slc25a21 | Slc25a21 | 3.73E-211 | 1.507592432 | 0.442 | 0.025 | 8.48E-207 | Ependymal |
| Stk36 | Stk36 | 9.01E-209 | 0.961191358 | 0.449 | 0.026 | 2.05E-204 | Ependymal |
| Il6ra1 | Il6ra | 4.42E-208 | 1.015233587 | 0.481 | 0.029 | 1.00E-203 | Ependymal |
| Txnip | Txnip | 1.98E-207 | 0.980157685 | 0.404 | 0.021 | 4.50E-203 | Ependymal |
| Sox9 | Sox9 | 7.26E-207 | 1.475009136 | 0.596 | 0.047 | 1.65E-202 | Ependymal |
| Pygl | Pygl | 2.62E-206 | 0.7973087 | 0.346 | 0.015 | 5.95E-202 | Ependymal |
| Drc3 | Drc3 | 6.04E-206 | 1.862694668 | 0.744 | 0.083 | 1.37E-201 | Ependymal |
| Srl | Srl | 7.43E-206 | 1.264360983 | 0.5 | 0.034 | 1.69E-201 | Ependymal |
| Nudt4 | Nudt4 | 1.85E-204 | 1.979651425 | 0.801 | 0.094 | 4.21E-200 | Ependymal |
| Ifitm3 | Ifitm3 | 7.43E-204 | 0.750139927 | 0.327 | 0.013 | 1.69E-199 | Ependymal |
| Gcnt1 | Gcnt1 | 5.97E-201 | 0.569482516 | 0.25 | 0.007 | 1.36E-196 | Ependymal |
| Acot6 | Acot6 | 4.24E-199 | 0.963403714 | 0.397 | 0.021 | 9.64E-195 | Ependymal |
| Plekha2 | Plekha2 | 1.39E-197 | 1.394193802 | 0.609 | 0.052 | 3.16E-193 | Ependymal |
| Ppp1r42 | Ppp1r42 | 3.84E-195 | 0.772441251 | 0.333 | 0.015 | 8.73E-191 | Ependymal |
| Gm149641 | Gm14964 | 2.55E-194 | 1.494167362 | 0.686 | 0.067 | 5.78E-190 | Ependymal |
| Iqub | Iqub | 6.64E-194 | 1.796449536 | 0.75 | 0.09 | 1.51E-189 | Ependymal |
| Kcnj16 | Kcnj16 | 3.52E-192 | 0.569648437 | 0.256 | 0.008 | 7.99E-188 | Ependymal |
| Cfap54 | Cfap54 | 4.07E-191 | 3.722799257 | 0.987 | 0.205 | 9.24E-187 | Ependymal |
| 1300017J02Rik | 1300017J02Rik | 4.61E-191 | 1.016640659 | 0.474 | 0.032 | 1.05E-186 | Ependymal |
| Efcab6 | Efcab6 | 6.91E-191 | 1.498307251 | 0.59 | 0.054 | 1.57E-186 | Ependymal |
| Ezr | Ezr | 1.33E-188 | 1.300345252 | 0.571 | 0.047 | 3.02E-184 | Ependymal |
| Atp8b5 | Atp8b5 | 4.34E-188 | 0.633556656 | 0.269 | 0.01 | 9.86E-184 | Ependymal |
| Armc2 | Armc2 | 2.33E-187 | 2.412378919 | 0.91 | 0.152 | 5.30E-183 | Ependymal |
| Endog | Endog | 1.43E-186 | 1.038787429 | 0.41 | 0.024 | 3.24E-182 | Ependymal |
| Cfap69 | Cfap69 | 1.63E-186 | 2.709497569 | 0.962 | 0.189 | 3.71E-182 | Ependymal |
| Zfp423 | Zfp423 | 6.97E-186 | 1.78699944 | 0.776 | 0.095 | 1.58E-181 | Ependymal |
| Nme5 | Nme5 | 3.01E-185 | 1.874085424 | 0.744 | 0.093 | 6.83E-181 | Ependymal |
| Bank11 | Bank1 | 7.34E-185 | 1.078958973 | 0.455 | 0.03 | 1.67E-180 | Ependymal |
| Eva1c | Eva1c | 1.64E-184 | 0.872006189 | 0.365 | 0.019 | 3.72E-180 | Ependymal |
| Musk | Musk | 3.09E-184 | 0.966069924 | 0.34 | 0.017 | 7.02E-180 | Ependymal |
| Wwtr12 | Wwtr1 | 2.23E-181 | 1.597093599 | 0.724 | 0.08 | 5.06E-177 | Ependymal |
| 10-Mar | 10-Mar | 4.79E-180 | 0.888607153 | 0.404 | 0.025 | 1.09E-175 | Ependymal |
| Anxa11 | Anxa11 | 1.88E-174 | 1.098421096 | 0.442 | 0.031 | 4.28E-170 | Ependymal |
| Sgms2 | Sgms2 | 2.62E-174 | 0.894766957 | 0.385 | 0.023 | 5.95E-170 | Ependymal |
| Mob3b2 | Mob3b | 1.82E-173 | 2.114276574 | 0.878 | 0.132 | 4.14E-169 | Ependymal |
| Dbi | Dbi | 6.65E-172 | 2.420835459 | 0.853 | 0.134 | 1.51E-167 | Ependymal |
| Pde6h | Pde6h | 1.32E-171 | 1.19710231 | 0.468 | 0.036 | 3.01E-167 | Ependymal |
| Dsg2 | Dsg2 | 3.44E-169 | 0.990587053 | 0.417 | 0.028 | 7.81E-165 | Ependymal |
| Ppil6 | Ppil6 | 7.92E-168 | 1.930617323 | 0.75 | 0.106 | 1.80E-163 | Ependymal |
| St3gal62 | St3gal6 | 1.30E-167 | 1.503060072 | 0.724 | 0.087 | 2.96E-163 | Ependymal |
| Nek10 | Nek10 | 6.58E-167 | 2.060963181 | 0.808 | 0.127 | 1.49E-162 | Ependymal |
| Kif19a | Kif19a | 2.27E-165 | 0.706234793 | 0.301 | 0.014 | 5.15E-161 | Ependymal |
| Col5a2 | Col5a2 | 2.36E-165 | 0.960635546 | 0.378 | 0.023 | 5.36E-161 | Ependymal |
| Sec24d | Sec24d | 1.12E-164 | 1.944141855 | 0.75 | 0.107 | 2.54E-160 | Ependymal |
| Fank1 | Fank1 | 2.37E-164 | 1.369112228 | 0.596 | 0.064 | 5.38E-160 | Ependymal |
| Frem1 | Frem1 | 2.89E-164 | 0.713202351 | 0.346 | 0.019 | 6.55E-160 | Ependymal |
| Erich2 | Erich2 | 8.40E-163 | 1.156806934 | 0.481 | 0.04 | 1.91E-158 | Ependymal |
| Agbl3 | Agbl3 | 3.57E-162 | 1.888130088 | 0.718 | 0.093 | 8.12E-158 | Ependymal |
| Tmem1081 | Tmem108 | 3.79E-162 | 2.543396498 | 0.923 | 0.178 | 8.61E-158 | Ependymal |
| Mt2 | Mt2 | 1.97E-161 | 1.042233542 | 0.455 | 0.035 | 4.48E-157 | Ependymal |
| Elof1 | Elof1 | 9.56E-161 | 1.093574822 | 0.449 | 0.034 | 2.17E-156 | Ependymal |
| Syt10 | Syt10 | 1.25E-160 | 2.265154103 | 0.865 | 0.159 | 2.85E-156 | Ependymal |
| Pbxip1 | Pbxip1 | 3.69E-159 | 1.151700376 | 0.506 | 0.043 | 8.37E-155 | Ependymal |
| Dcdc2a | Dcdc2a | 4.17E-155 | 1.240523661 | 0.558 | 0.056 | 9.47E-151 | Ependymal |
| Synm | Synm | 2.40E-154 | 0.910246533 | 0.423 | 0.031 | 5.45E-150 | Ependymal |
| Cdc14a1 | Cdc14a | 3.25E-154 | 1.775176483 | 0.699 | 0.089 | 7.38E-150 | Ependymal |
| Fbxw10 | Fbxw10 | 2.56E-153 | 0.619205333 | 0.25 | 0.011 | 5.80E-149 | Ependymal |
| Mak | Mak | 1.23E-152 | 1.374625213 | 0.564 | 0.06 | 2.80E-148 | Ependymal |
| Grk4 | Grk4 | 1.89E-150 | 1.67969633 | 0.776 | 0.117 | 4.29E-146 | Ependymal |
| Fam161a | Fam161a | 1.42E-149 | 0.666777765 | 0.308 | 0.017 | 3.23E-145 | Ependymal |
| Ccdc171 | Ccdc171 | 3.84E-149 | 1.891546999 | 0.769 | 0.122 | 8.71E-145 | Ependymal |
| Slc2a11 | Slc2a1 | 8.22E-149 | 1.169620513 | 0.558 | 0.057 | 1.87E-144 | Ependymal |
| Rhobtb11 | Rhobtb1 | 1.13E-147 | 1.143275858 | 0.545 | 0.055 | 2.57E-143 | Ependymal |
| Tgfbr22 | Tgfbr2 | 2.44E-147 | 1.088261858 | 0.538 | 0.052 | 5.53E-143 | Ependymal |
| Ccdc78 | Ccdc78 | 4.31E-147 | 0.914751915 | 0.391 | 0.028 | 9.79E-143 | Ependymal |
| K230010J24Rik | K230010J24Rik | 4.57E-146 | 0.738734408 | 0.321 | 0.019 | 1.04E-141 | Ependymal |
| Tshr | Tshr | 2.57E-145 | 1.281791757 | 0.449 | 0.038 | 5.84E-141 | Ependymal |
| Col4a5 | Col4a5 | 3.34E-144 | 0.728129485 | 0.34 | 0.021 | 7.59E-140 | Ependymal |
| Rnase4 | Rnase4 | 1.19E-142 | 0.545306588 | 0.263 | 0.013 | 2.70E-138 | Ependymal |
| Gm17135 | Gm17135 | 9.39E-141 | 1.144515716 | 0.571 | 0.066 | 2.13E-136 | Ependymal |
| Lrrc6 | Lrrc6 | 1.24E-140 | 1.90924492 | 0.776 | 0.14 | 2.81E-136 | Ependymal |
| Sft2d11 | Sft2d1 | 2.72E-140 | 2.266018304 | 0.904 | 0.205 | 6.18E-136 | Ependymal |
| Slc39a121 | Slc39a12 | 2.91E-140 | 1.423856499 | 0.673 | 0.086 | 6.61E-136 | Ependymal |
| Ccdc173 | Ccdc173 | 9.72E-140 | 1.449179027 | 0.673 | 0.095 | 2.21E-135 | Ependymal |
| Cd55 | Cd55 | 1.21E-138 | 0.523392804 | 0.269 | 0.014 | 2.75E-134 | Ependymal |
| Sparc2 | Sparc | 1.23E-138 | 1.311700326 | 0.577 | 0.065 | 2.79E-134 | Ependymal |
| Ttc16 | Ttc16 | 8.99E-138 | 0.758780593 | 0.385 | 0.029 | 2.04E-133 | Ependymal |
| Kif27 | Kif27 | 4.11E-137 | 1.749684422 | 0.782 | 0.143 | 9.34E-133 | Ependymal |
| Iqch | Iqch | 2.67E-136 | 1.260024034 | 0.532 | 0.057 | 6.07E-132 | Ependymal |
| Amotl2 | Amotl2 | 2.14E-135 | 0.948928733 | 0.417 | 0.034 | 4.87E-131 | Ependymal |
| Spag6.1 | Spag6.1 | 6.59E-135 | 2.136297457 | 0.904 | 0.218 | 1.50E-130 | Ependymal |
| Bicc12 | Bicc1 | 1.64E-134 | 2.0843002 | 0.91 | 0.205 | 3.72E-130 | Ependymal |
| Pard3b3 | Pard3b | 1.02E-133 | 2.277777975 | 0.962 | 0.228 | 2.31E-129 | Ependymal |
| Mns1 | Mns1 | 4.53E-133 | 1.234442469 | 0.583 | 0.073 | 1.03E-128 | Ependymal |
| Tram2 | Tram2 | 2.25E-131 | 0.475250055 | 0.256 | 0.013 | 5.11E-127 | Ependymal |
| Anxa5 | Anxa5 | 1.14E-129 | 1.02794281 | 0.455 | 0.044 | 2.59E-125 | Ependymal |
| Cfap74 | Cfap74 | 1.99E-129 | 2.001077018 | 0.885 | 0.212 | 4.51E-125 | Ependymal |
| Hspa2 | Hspa2 | 3.58E-128 | 0.621046098 | 0.288 | 0.017 | 8.13E-124 | Ependymal |
| BC067074 | BC067074 | 9.01E-128 | 0.733324784 | 0.353 | 0.026 | 2.05E-123 | Ependymal |
| Ccdc74a | Ccdc74a | 2.68E-127 | 0.568078148 | 0.295 | 0.018 | 6.09E-123 | Ependymal |
| Cald13 | Cald1 | 4.15E-127 | 1.583994798 | 0.776 | 0.131 | 9.42E-123 | Ependymal |
| Cntrl | Cntrl | 8.55E-126 | 1.371038744 | 0.724 | 0.115 | 1.94E-121 | Ependymal |
| Arhgef261 | Arhgef26 | 3.64E-125 | 1.489829898 | 0.744 | 0.117 | 8.28E-121 | Ependymal |
| Wdr78 | Wdr78 | 1.54E-124 | 2.23380725 | 0.897 | 0.244 | 3.49E-120 | Ependymal |
| Myo1e2 | Myo1e | 3.42E-124 | 1.346238641 | 0.763 | 0.118 | 7.76E-120 | Ependymal |
| Spata24 | Spata24 | 4.30E-123 | 0.936353663 | 0.455 | 0.045 | 9.76E-119 | Ependymal |
| Ankrd444 | Ankrd44 | 3.44E-122 | 2.086917945 | 0.91 | 0.208 | 7.82E-118 | Ependymal |
| Fzd61 | Fzd6 | 4.04E-122 | 0.593260011 | 0.308 | 0.02 | 9.17E-118 | Ependymal |
| AC151836.1 | AC151836.1 | 7.43E-122 | 1.403103552 | 0.59 | 0.083 | 1.69E-117 | Ependymal |
| Ascc1 | Ascc1 | 3.68E-121 | 1.629240762 | 0.705 | 0.124 | 8.35E-117 | Ependymal |
| Syne2 | Syne2 | 1.03E-120 | 1.106313495 | 0.596 | 0.077 | 2.35E-116 | Ependymal |
| Ccdc80 | Ccdc80 | 2.02E-120 | 0.636757039 | 0.295 | 0.019 | 4.59E-116 | Ependymal |
| Gja11 | Gja1 | 2.79E-120 | 1.496638014 | 0.731 | 0.121 | 6.33E-116 | Ependymal |
| Uaca | Uaca | 3.77E-119 | 0.513862358 | 0.25 | 0.014 | 8.55E-115 | Ependymal |
| Tmem471 | Tmem47 | 4.76E-119 | 1.824434087 | 0.859 | 0.199 | 1.08E-114 | Ependymal |
| Drc1 | Drc1 | 5.92E-119 | 1.498615769 | 0.686 | 0.12 | 1.35E-114 | Ependymal |
| Slc38a3 | Slc38a3 | 1.06E-118 | 0.846528508 | 0.404 | 0.036 | 2.41E-114 | Ependymal |
| Cfap99 | Cfap99 | 3.37E-118 | 0.975476389 | 0.442 | 0.047 | 7.65E-114 | Ependymal |
| Megf6 | Megf6 | 6.08E-118 | 0.752748421 | 0.321 | 0.024 | 1.38E-113 | Ependymal |
| Eya2 | Eya2 | 2.62E-117 | 0.757478258 | 0.308 | 0.021 | 5.96E-113 | Ependymal |
| Gpc4 | Gpc4 | 1.16E-116 | 0.893143048 | 0.346 | 0.027 | 2.64E-112 | Ependymal |
| Slc38a12 | Slc38a1 | 6.30E-116 | 2.348527402 | 0.974 | 0.345 | 1.43E-111 | Ependymal |
| Rhpn2 | Rhpn2 | 4.98E-115 | 0.641111696 | 0.34 | 0.026 | 1.13E-110 | Ependymal |
| Wdr27 | Wdr27 | 1.11E-114 | 1.255688938 | 0.526 | 0.069 | 2.51E-110 | Ependymal |
| Cnn3 | Cnn3 | 2.61E-114 | 1.31095378 | 0.654 | 0.104 | 5.93E-110 | Ependymal |
| Plekha7 | Plekha7 | 5.08E-114 | 1.699873558 | 0.756 | 0.15 | 1.15E-109 | Ependymal |
| Gm13830 | Gm13830 | 7.60E-114 | 0.940896441 | 0.462 | 0.051 | 1.73E-109 | Ependymal |
| Synpo2 | Synpo2 | 1.73E-113 | 2.091357496 | 0.801 | 0.183 | 3.94E-109 | Ependymal |
| Ttc284 | Ttc28 | 2.39E-113 | 2.166039667 | 0.955 | 0.275 | 5.43E-109 | Ependymal |
| Sox62 | Sox6 | 4.29E-113 | 2.073386353 | 0.942 | 0.237 | 9.74E-109 | Ependymal |
| Sox53 | Sox5 | 4.93E-113 | 1.929883852 | 0.949 | 0.231 | 1.12E-108 | Ependymal |
| Ccdc65 | Ccdc65 | 6.35E-113 | 0.59402895 | 0.288 | 0.02 | 1.44E-108 | Ependymal |
| Cachd11 | Cachd1 | 1.16E-112 | 1.928404025 | 0.878 | 0.222 | 2.64E-108 | Ependymal |
| Pdlim4 | Pdlim4 | 1.94E-112 | 0.503167754 | 0.276 | 0.018 | 4.40E-108 | Ependymal |
| Spef1 | Spef1 | 5.34E-112 | 0.589889913 | 0.263 | 0.017 | 1.21E-107 | Ependymal |
| Lama3 | Lama3 | 8.62E-112 | 0.897987186 | 0.41 | 0.04 | 1.96E-107 | Ependymal |
| Sorbs3 | Sorbs3 | 5.78E-111 | 0.776646464 | 0.404 | 0.038 | 1.31E-106 | Ependymal |
| Ccdc191 | Ccdc191 | 6.52E-111 | 1.985417213 | 0.872 | 0.23 | 1.48E-106 | Ependymal |
| Dnah1 | Dnah1 | 6.71E-111 | 0.904852284 | 0.417 | 0.044 | 1.52E-106 | Ependymal |
| Gm405781 | Gm40578 | 8.27E-110 | 0.905232034 | 0.513 | 0.06 | 1.88E-105 | Ependymal |
| Mettl7a1 | Mettl7a1 | 1.54E-109 | 1.19936644 | 0.647 | 0.102 | 3.50E-105 | Ependymal |
| Kif24 | Kif24 | 2.79E-109 | 1.17798658 | 0.571 | 0.082 | 6.35E-105 | Ependymal |
| Pter | Pter | 9.02E-109 | 0.697340823 | 0.378 | 0.034 | 2.05E-104 | Ependymal |
| E130114P18Rik1 | E130114P18Rik | 1.25E-108 | 1.023009964 | 0.506 | 0.06 | 2.83E-104 | Ependymal |
| Boc | Boc | 1.49E-108 | 0.81038499 | 0.321 | 0.025 | 3.38E-104 | Ependymal |
| Lrriq3 | Lrriq3 | 2.51E-108 | 0.680299825 | 0.288 | 0.021 | 5.69E-104 | Ependymal |
| Prom11 | Prom1 | 3.89E-108 | 0.565818499 | 0.282 | 0.019 | 8.83E-104 | Ependymal |
| Dmkn | Dmkn | 2.63E-106 | 0.612803198 | 0.263 | 0.017 | 5.97E-102 | Ependymal |
| Gpr156 | Gpr156 | 3.15E-106 | 0.784045046 | 0.346 | 0.03 | 7.16E-102 | Ependymal |
| Agbl41 | Agbl4 | 2.04E-104 | 2.873307171 | 1 | 0.571 | 4.64E-100 | Ependymal |
| 1700029J07Rik | 1700029J07Rik | 3.16E-104 | 1.16107733 | 0.532 | 0.075 | 7.17E-100 | Ependymal |
| Shank21 | Shank2 | 3.79E-104 | 2.593913697 | 0.981 | 0.487 | 8.60E-100 | Ependymal |
| Plce13 | Plce1 | 6.64E-104 | 1.953085649 | 0.846 | 0.215 | 1.51E-99 | Ependymal |
| Aox1 | Aox1 | 1.04E-103 | 0.651998378 | 0.308 | 0.024 | 2.36E-99 | Ependymal |
| RF019621 | RF01962 | 1.87E-103 | 1.837284802 | 0.814 | 0.171 | 4.25E-99 | Ependymal |
| Lca5 | Lca5 | 2.12E-103 | 1.785407607 | 0.75 | 0.176 | 4.81E-99 | Ependymal |
| Cep1281 | Cep128 | 4.24E-103 | 2.261213872 | 0.897 | 0.299 | 9.63E-99 | Ependymal |
| Stard8 | Stard8 | 6.16E-103 | 0.668628549 | 0.327 | 0.027 | 1.40E-98 | Ependymal |
| Tnfaip8 | Tnfaip8 | 8.86E-103 | 0.958192368 | 0.391 | 0.039 | 2.01E-98 | Ependymal |
| Ccdc301 | Ccdc30 | 1.48E-102 | 2.303759382 | 0.942 | 0.401 | 3.37E-98 | Ependymal |
| Scml4 | Scml4 | 2.10E-102 | 1.214918002 | 0.551 | 0.081 | 4.78E-98 | Ependymal |
| Plcb42 | Plcb4 | 6.31E-102 | 1.890602899 | 0.897 | 0.242 | 1.43E-97 | Ependymal |
| Syne11 | Syne1 | 9.68E-102 | 2.65730906 | 1 | 0.81 | 2.20E-97 | Ependymal |
| Cfap77 | Cfap77 | 3.93E-101 | 1.661054571 | 0.776 | 0.177 | 8.94E-97 | Ependymal |
| Tubb4b | Tubb4b | 6.00E-101 | 1.227050337 | 0.545 | 0.08 | 1.36E-96 | Ependymal |
| Gstm1 | Gstm1 | 1.28E-100 | 1.17332812 | 0.462 | 0.057 | 2.91E-96 | Ependymal |
| Etnppl | Etnppl | 1.38E-100 | 0.728817749 | 0.359 | 0.033 | 3.14E-96 | Ependymal |
| Gas6 | Gas6 | 2.16E-100 | 1.5296347 | 0.718 | 0.152 | 4.90E-96 | Ependymal |
| Galk2 | Galk2 | 2.32E-100 | 1.644825136 | 0.827 | 0.219 | 5.27E-96 | Ependymal |
| Mlc1 | Mlc1 | 3.20E-100 | 0.881985507 | 0.442 | 0.051 | 7.26E-96 | Ependymal |
| Itih51 | Itih5 | 3.45E-100 | 0.69226191 | 0.34 | 0.03 | 7.85E-96 | Ependymal |
| Maml24 | Maml2 | 7.39E-100 | 2.351027698 | 0.974 | 0.347 | 1.68E-95 | Ependymal |
| 1700003E16Rik | 1700003E16Rik | 1.02E-99 | 0.640033649 | 0.301 | 0.025 | 2.32E-95 | Ependymal |
| Eps83 | Eps8 | 1.02E-99 | 1.487480633 | 0.705 | 0.135 | 2.32E-95 | Ependymal |
| Nck2 | Nck2 | 1.47E-98 | 1.73429416 | 0.808 | 0.213 | 3.34E-94 | Ependymal |
| Polk1 | Polk | 2.28E-98 | 1.303062073 | 0.692 | 0.136 | 5.17E-94 | Ependymal |
| A430073D23Rik | A430073D23Rik | 1.03E-97 | 0.783997279 | 0.34 | 0.032 | 2.33E-93 | Ependymal |
| Ston22 | Ston2 | 1.09E-97 | 1.534905667 | 0.795 | 0.172 | 2.47E-93 | Ependymal |
| Efcab1 | Efcab1 | 1.27E-97 | 1.643553152 | 0.673 | 0.144 | 2.88E-93 | Ependymal |
| Ccdc138 | Ccdc138 | 1.40E-97 | 1.592892672 | 0.763 | 0.179 | 3.19E-93 | Ependymal |
| St8sia2 | St8sia2 | 6.22E-97 | 1.302132681 | 0.66 | 0.128 | 1.41E-92 | Ependymal |
| Nxn2 | Nxn | 7.42E-97 | 1.449828553 | 0.724 | 0.139 | 1.68E-92 | Ependymal |
| Dnal1 | Dnal1 | 1.69E-96 | 1.941575981 | 0.872 | 0.288 | 3.85E-92 | Ependymal |
| Mpdz1 | Mpdz | 3.29E-96 | 1.61067138 | 0.782 | 0.186 | 7.47E-92 | Ependymal |
| Nhsl12 | Nhsl1 | 3.63E-96 | 1.134247064 | 0.654 | 0.108 | 8.24E-92 | Ependymal |
| Nnat2 | Nnat | 1.76E-95 | 2.745232353 | 0.974 | 0.462 | 4.01E-91 | Ependymal |
| Ccdc1481 | Ccdc148 | 1.33E-94 | 2.133168307 | 0.949 | 0.412 | 3.02E-90 | Ependymal |
| Arhgef33 | Arhgef33 | 1.84E-93 | 1.399968389 | 0.609 | 0.115 | 4.19E-89 | Ependymal |
| Tppp3 | Tppp3 | 1.87E-93 | 0.894620263 | 0.372 | 0.04 | 4.25E-89 | Ependymal |
| Pir | Pir | 4.33E-93 | 1.101426673 | 0.462 | 0.062 | 9.83E-89 | Ependymal |
| Lekr1 | Lekr1 | 6.11E-93 | 2.105164786 | 0.859 | 0.287 | 1.39E-88 | Ependymal |
| mt-Nd5 | mt-Nd5 | 7.58E-93 | 1.584260752 | 0.679 | 0.143 | 1.72E-88 | Ependymal |
| Ggta1 | Ggta1 | 1.49E-92 | 0.620035688 | 0.288 | 0.023 | 3.38E-88 | Ependymal |
| Npas32 | Npas3 | 1.75E-92 | 2.249204585 | 1 | 0.428 | 3.98E-88 | Ependymal |
| Ccdc39 | Ccdc39 | 1.91E-92 | 1.620747533 | 0.699 | 0.164 | 4.33E-88 | Ependymal |
| Tes1 | Tes | 2.00E-92 | 0.684839719 | 0.263 | 0.02 | 4.55E-88 | Ependymal |
| Lpar11 | Lpar1 | 2.95E-92 | 1.266911515 | 0.59 | 0.095 | 6.70E-88 | Ependymal |
| Phkg11 | Phkg1 | 6.17E-92 | 1.133179711 | 0.615 | 0.102 | 1.40E-87 | Ependymal |
| Ptpn131 | Ptpn13 | 8.24E-92 | 1.485945929 | 0.776 | 0.192 | 1.87E-87 | Ependymal |
| Plod2 | Plod2 | 1.92E-91 | 0.605539362 | 0.314 | 0.029 | 4.37E-87 | Ependymal |
| Tmem107 | Tmem107 | 4.60E-91 | 0.656605664 | 0.295 | 0.026 | 1.04E-86 | Ependymal |
| Hipk11 | Hipk1 | 4.94E-91 | 1.783675712 | 0.865 | 0.283 | 1.12E-86 | Ependymal |
| Tacc21 | Tacc2 | 2.76E-90 | 1.592780743 | 0.769 | 0.21 | 6.26E-86 | Ependymal |
| Sugct1 | Sugct | 8.67E-90 | 1.49101722 | 0.615 | 0.111 | 1.97E-85 | Ependymal |
| AC154683.11 | AC154683.1 | 4.54E-89 | 1.127225385 | 0.571 | 0.095 | 1.03E-84 | Ependymal |
| Prag1 | Prag1 | 7.22E-89 | 1.241242291 | 0.654 | 0.128 | 1.64E-84 | Ependymal |
| Etfbkmt | Etfbkmt | 1.45E-88 | 0.488820286 | 0.256 | 0.02 | 3.28E-84 | Ependymal |
| Wwc11 | Wwc1 | 1.54E-88 | 2.390636648 | 0.917 | 0.412 | 3.51E-84 | Ependymal |
| Ntn4 | Ntn4 | 2.37E-88 | 0.86969916 | 0.397 | 0.047 | 5.39E-84 | Ependymal |
| Rpgrip1l | Rpgrip1l | 6.41E-88 | 1.681427137 | 0.782 | 0.226 | 1.46E-83 | Ependymal |
| Ift81 | Ift81 | 7.28E-88 | 1.528591901 | 0.756 | 0.199 | 1.65E-83 | Ependymal |
| Ptprk3 | Ptprk | 1.58E-87 | 1.613351764 | 0.936 | 0.267 | 3.58E-83 | Ependymal |
| Agmo2 | Agmo | 1.71E-87 | 1.457672615 | 0.647 | 0.118 | 3.89E-83 | Ependymal |
| 2210408I21Rik | 2210408I21Rik | 1.22E-86 | 2.171243236 | 0.981 | 0.565 | 2.77E-82 | Ependymal |
| Ift88 | Ift88 | 1.32E-86 | 1.616412267 | 0.846 | 0.273 | 3.01E-82 | Ependymal |
| Rsph14 | Rsph14 | 8.10E-86 | 1.0769547 | 0.442 | 0.063 | 1.84E-81 | Ependymal |
| Mt11 | Mt1 | 1.67E-85 | 1.634355712 | 0.673 | 0.146 | 3.79E-81 | Ependymal |
| Tspan15 | Tspan15 | 1.84E-85 | 0.838671447 | 0.468 | 0.064 | 4.19E-81 | Ependymal |
| Nckap52 | Nckap5 | 4.36E-85 | 1.728906168 | 0.885 | 0.257 | 9.89E-81 | Ependymal |
| Ccdc13 | Ccdc13 | 1.05E-84 | 0.786309973 | 0.397 | 0.05 | 2.39E-80 | Ependymal |
| mt-Co12 | mt-Co1 | 1.43E-84 | 3.015601388 | 0.981 | 0.701 | 3.24E-80 | Ependymal |
| Cecr21 | Cecr2 | 2.75E-84 | 0.964428544 | 0.506 | 0.074 | 6.25E-80 | Ependymal |
| Clu1 | Clu | 4.39E-84 | 1.679492476 | 0.737 | 0.185 | 9.98E-80 | Ependymal |
| 4933406C10Rik | 4933406C10Rik | 2.43E-83 | 0.924422497 | 0.429 | 0.06 | 5.52E-79 | Ependymal |
| Tsga10 | Tsga10 | 2.11E-82 | 1.928270321 | 0.846 | 0.316 | 4.80E-78 | Ependymal |
| 4930578M01Rik | 4930578M01Rik | 6.51E-82 | 1.189640449 | 0.526 | 0.092 | 1.48E-77 | Ependymal |
| 9530036O11Rik | 9530036O11Rik | 7.60E-82 | 0.918966643 | 0.429 | 0.06 | 1.73E-77 | Ependymal |
| Shisa61 | Shisa6 | 1.93E-81 | 1.281488398 | 0.571 | 0.103 | 4.38E-77 | Ependymal |
| mt-Cytb1 | mt-Cytb | 6.15E-81 | 2.439403022 | 0.987 | 0.586 | 1.40E-76 | Ependymal |
| Gm42902 | Gm42902 | 7.91E-81 | 0.684273843 | 0.333 | 0.037 | 1.80E-76 | Ependymal |
| mt-Atp61 | mt-Atp6 | 3.69E-80 | 2.502074424 | 1 | 0.787 | 8.38E-76 | Ependymal |
| Pacrg1 | Pacrg | 5.74E-80 | 2.028201063 | 0.962 | 0.454 | 1.30E-75 | Ependymal |
| Bcar31 | Bcar3 | 6.67E-80 | 1.020753827 | 0.577 | 0.105 | 1.51E-75 | Ependymal |
| Ankef1 | Ankef1 | 7.95E-79 | 0.673513536 | 0.34 | 0.04 | 1.81E-74 | Ependymal |
| Mt3 | Mt3 | 9.48E-79 | 1.368488183 | 0.551 | 0.104 | 2.15E-74 | Ependymal |
| Tceal3 | Tceal3 | 1.79E-78 | 1.048469214 | 0.538 | 0.098 | 4.08E-74 | Ependymal |
| Ablim11 | Ablim1 | 2.28E-78 | 1.823216758 | 0.91 | 0.374 | 5.19E-74 | Ependymal |
| Wwox1 | Wwox | 4.30E-78 | 2.080216836 | 0.994 | 0.629 | 9.76E-74 | Ependymal |
| Dmd2 | Dmd | 6.04E-78 | 1.788907275 | 0.994 | 0.812 | 1.37E-73 | Ependymal |
| mt-Co31 | mt-Co3 | 2.13E-77 | 2.416904297 | 0.994 | 0.773 | 4.83E-73 | Ependymal |
| Metrn | Metrn | 3.17E-77 | 0.535657589 | 0.263 | 0.024 | 7.20E-73 | Ependymal |
[truncated: 101,333 more chars]
