# Supplementary material for: Single-nucleus transcriptomic mapping uncovers targets for traumatic brain injury
Source: HighWire-hosted journal article supplement (doi:10.1101/gr.277881.123), 2023-09-20
Supplement: Supplemental_Table_S3.docx [file Supplemental_Table_S3.docx]

| **Supplemental Table S3. scCODA rusults for Fig. 2a** | | | | | | | | |
| --- | --- | --- | --- | --- | --- | --- | --- | --- |
| Compositional Analysis summary: |  |  |  |  |  |  |  |  |
|  |  |  |  |  |  |  |  |  |
| Data: 2 samples, 7 cell types |  |  |  |  |  |  |  |  |
| Reference index: 6 |  |  |  |  |  |  |  |  |
| Formula: Condition |  |  |  |  |  |  |  |  |
|  |  |  |  |  |  |  |  |  |
| Intercepts: |  |  |  |  |  |  |  |  |
|  | Final Parameter | Expected Sample |  |  |  |  |  |  |
| Cell Type |  |  |  |  |  |  |  |  |
| Neuron | 5.252 | 4897.057586 |  |  |  |  |  |  |
| Oligodendrocyte | 3.589 | 928.332356 |  |  |  |  |  |  |
| Astrocyte & NSC | 3.771 | 1113.640671 |  |  |  |  |  |  |
| Microglia | 2.401 | 282.983845 |  |  |  |  |  |  |
| OPC | 2.04 | 197.233797 |  |  |  |  |  |  |
| Endocelia | 1.653 | 133.939715 |  |  |  |  |  |  |
| Ependymal | 1.129 | 79.312029 |  |  |  |  |  |  |
|  |  |  |  |  |  |  |  |  |
|  |  |  |  |  |  |  |  |  |
| Effects: |  |  |  |  |  |  |  |  |
| Covariate | Cell Type | Final Parameter | HDI 3% | HDI 97% | SD | Inclusion probability | Expected Sample | log2-fold change |
| Condition[T.mTBI] | Neuron | -0.293152618 | -0.726 | 0.085 | 0.229 | 0.607266667 | 4036.168428 | -0.278928782 |
| Condition[T.mTBI] | Oligodendrocyte | 0.401945627 | -0.065 | 0.919 | 0.31 | 0.74 | 1533.256766 | 0.723886009 |
| Condition[T.mTBI] | Astrocyte & NSC | 0 | -0.567 | 0.39 | 0.173 | 0.472066667 | 1230.534283 | 0.144001046 |
| Condition[T.mTBI] | Microglia | 0.192248698 | -0.435 | 0.875 | 0.275 | 0.514733333 | 378.9682498 | 0.421357289 |
| Condition[T.mTBI] | OPC | 0 | -0.589 | 0.745 | 0.252 | 0.4996 | 217.9364988 | 0.144001046 |
| Condition[T.mTBI] | Endocelia | 0 | -0.531 | 0.828 | 0.248 | 0.511666667 | 147.9987356 | 0.144001046 |
| Condition[T.mTBI] | Ependymal | 0 | 0 | 0 | 0 | 0 | 87.63703918 | 0.144001046 |

| **Supplemental Table S3. scCODA rusults for Fig. 4c.** | | | | | | | | |
| --- | --- | --- | --- | --- | --- | --- | --- | --- |
| Compositional Analysis summary: |  |  |  |  |  |  |  |  |
|  |  |  |  |  |  |  |  |  |
| Data: 2 samples, 5 cell types |  |  |  |  |  |  |  |  |
| Reference index: 0 |  |  |  |  |  |  |  |  |
| Formula: Condition |  |  |  |  |  |  |  |  |
|  |  |  |  |  |  |  |  |  |
| Intercepts: |  |  |  |  |  |  |  |  |
|  | Final Parameter | Expected Sample |  |  |  |  |  |  |
| Cell Type |  |  |  |  |  |  |  |  |
| Astrocytes | 3.93 | 432.552338 |  |  |  |  |  |  |
| Neuroblasts | 3.402 | 255.11217 |  |  |  |  |  |  |
| early aNSC | 3.159 | 200.077208 |  |  |  |  |  |  |
| qNSC | 2.333 | 87.593197 |  |  |  |  |  |  |
| late aNSCs | 2.299 | 84.665088 |  |  |  |  |  |  |
|  |  |  |  |  |  |  |  |  |
|  |  |  |  |  |  |  |  |  |
| Effects: |  |  |  |  |  |  |  |  |
| Covariate | Cell Type | Final Parameter | HDI 3% | HDI 97% | SD | Inclusion probability | Expected Sample | log2-fold change |
| Condition[T.mTBI] | Astrocytes | 0 | 0 | 0 | 0 | 0 | 400.6903219 | -0.110387042 |
| Condition[T.mTBI] | Neuroblasts | 0 | -0.6 | 0.385 | 0.187 | 0.4262 | 236.3204834 | -0.110387042 |
| Condition[T.mTBI] | early aNSC | 0 | -0.592 | 0.489 | 0.188 | 0.406 | 185.3394232 | -0.110387042 |
| Condition[T.mTBI] | qNSC | 0.674105285 | -0.187 | 1.46 | 0.51 | 0.735933333 | 159.2211552 | 0.86214131 |
| Condition[T.mTBI] | late aNSCs | 0 | -0.575 | 0.676 | 0.263 | 0.427333333 | 78.42861627 | -0.110387042 |

| **Supplemental Table S3. scCODA rusults for Fig. 5d.** | | | | | | | | |
| --- | --- | --- | --- | --- | --- | --- | --- | --- |
| Compositional Analysis summary: |  |  |  |  |  |  |  |  |
|  |  |  |  |  |  |  |  |  |
| Data: 2 samples, 5 cell types |  |  |  |  |  |  |  |  |
| Reference index: 4 |  |  |  |  |  |  |  |  |
| Formula: Condition |  |  |  |  |  |  |  |  |
|  |  |  |  |  |  |  |  |  |
| Intercepts: |  |  |  |  |  |  |  |  |
|  | Final Parameter | Expected Sample |  |  |  |  |  |  |
| Cell Type |  |  |  |  |  |  |  |  |
| State 1 | 4.782 | 358.756662 |  |  |  |  |  |  |
| State 2 | 3.446 | 94.315386 |  |  |  |  |  |  |
| State 3 | 4.702 | 331.174139 |  |  |  |  |  |  |
| State 4 | 4.041 | 170.996713 |  |  |  |  |  |  |
| State 5 | 3.551 | 104.7571 |  |  |  |  |  |  |
|  |  |  |  |  |  |  |  |  |
|  |  |  |  |  |  |  |  |  |
| Effects: |  |  |  |  |  |  |  |  |
| Covariate | Cell Type | Final Parameter | HDI 3% | HDI 97% | SD | Inclusion probability | Expected Sample | log2-fold change |
| Condition[T.mTBI] | State 1 | 0.134641232 | -0.138 | 0.453 | 0.144 | 0.5568 | 401.8593929 | 0.163685182 |
| Condition[T.mTBI] | State 2 | 0.010933816 | -0.518 | 0.432 | 0.16 | 0.4444 | 93.35363824 | -0.014786893 |
| Condition[T.mTBI] | State 3 | -0.071453508 | -0.407 | 0.22 | 0.112 | 0.3886 | 301.873338 | -0.133646678 |
| Condition[T.mTBI] | State 4 | -0.043087794 | -0.484 | 0.23 | 0.124 | 0.4136 | 160.3522941 | -0.092723602 |
| Condition[T.mTBI] | State 5 | 0 | 0 | 0 | 0 | 0 | 102.5613368 | -0.030561055 |
