# Supplementary material for: Single-nucleus transcriptomic mapping uncovers targets for traumatic brain injury
Source: HighWire-hosted journal article supplement (doi:10.1101/gr.277881.123), 2023-09-20
Supplement: Supplemental_Table_S4.docx [file Supplemental_Table_S4.docx]

| **Supplemental Table S4. Differentially expressed genes in each cell type generated comparing the control and the mTBI SVZ, related to Figure 2. (OPC DEGs)** | | | | | |
| --- | --- | --- | --- | --- | --- |
| Column1 | p_val | avg_log2FC | pct.1 | pct.2 | p_val_adj |
| Gm42418 | 1.89905E-19 | 0.645340854 | 1 | 1 | 4.3133E-15 |
| Malat1 | 5.24762E-08 | 0.288759074 | 1 | 1 | 0.001191893 |
| Gm20388 | 8.98257E-06 | -0.349040743 | 0.954 | 0.972 | 0.204021032 |
| Cnp | 4.73641E-05 | 0.442398415 | 0.31 | 0.141 | 1 |
| Larp4b | 4.93905E-05 | 0.45572858 | 0.473 | 0.271 | 1 |
| Gm43376 | 7.51533E-05 | -0.544813042 | 0.105 | 0.243 | 1 |
| Grsf1 | 7.59263E-05 | -0.381290317 | 0.046 | 0.158 | 1 |
| Gria2 | 9.0751E-05 | -0.369267495 | 0.954 | 0.977 | 1 |
| Celf2 | 0.000127347 | -0.462756712 | 0.967 | 0.989 | 1 |
| Aatk | 0.000141974 | 0.463372042 | 0.473 | 0.294 | 1 |
| Ppp1cc | 0.000156518 | 0.529176607 | 0.264 | 0.124 | 1 |
| Sorbs2os | 0.000183285 | -0.342569153 | 0.159 | 0.316 | 1 |
| AC149090.1 | 0.000205653 | 0.52907403 | 0.356 | 0.203 | 1 |
| Nkain3 | 0.000230064 | -0.525486251 | 0.561 | 0.718 | 1 |
| Fndc9 | 0.000252262 | -0.547934741 | 0.197 | 0.356 | 1 |
| Sncaip | 0.000255807 | -0.640902186 | 0.172 | 0.316 | 1 |
| Mpped1 | 0.000294356 | -0.351528098 | 0.071 | 0.186 | 1 |
| Tmsb4x | 0.000297058 | -0.436446446 | 0.481 | 0.644 | 1 |
| Bin1 | 0.000335111 | 0.587465247 | 0.427 | 0.277 | 1 |
| Tmem55b | 0.000356843 | 0.30507853 | 0.105 | 0.017 | 1 |
| Capn5 | 0.000452924 | 0.331420985 | 0.197 | 0.073 | 1 |
| Sun2 | 0.000462625 | 0.316127641 | 0.113 | 0.023 | 1 |
| Tox3 | 0.00048578 | -0.608698057 | 0.444 | 0.548 | 1 |
| Camk1d | 0.000531282 | 0.355464492 | 0.774 | 0.644 | 1 |
| Atp11a | 0.000532589 | 0.386383526 | 0.301 | 0.158 | 1 |
| Tac1 | 0.000554705 | -0.476191964 | 0.264 | 0.424 | 1 |
| Ctcf | 0.000678029 | 0.331573145 | 0.335 | 0.186 | 1 |
| Brsk1 | 0.000734033 | 0.336393418 | 0.28 | 0.141 | 1 |
| Camkv | 0.000862918 | -0.467382213 | 0.163 | 0.288 | 1 |
| Usp20 | 0.000924457 | 0.412122113 | 0.276 | 0.141 | 1 |
| Kcnip3 | 0.000939945 | 0.51566258 | 0.715 | 0.65 | 1 |
| Ndrg4 | 0.000968535 | -0.314485815 | 0.544 | 0.667 | 1 |
| Plp1 | 0.000986813 | 0.490268236 | 0.912 | 0.808 | 1 |
| Plce1 | 0.000991423 | -0.45431284 | 0.439 | 0.588 | 1 |
| Brwd1 | 0.001002904 | 0.328181968 | 0.569 | 0.407 | 1 |
| Dock9 | 0.001017518 | 0.442165073 | 0.854 | 0.751 | 1 |
| Ctnna3 | 0.001019984 | -0.368625571 | 0.799 | 0.864 | 1 |
| Kcnc2 | 0.001040104 | 0.548671924 | 0.251 | 0.13 | 1 |
| Agpat4 | 0.001087955 | 0.39200791 | 0.347 | 0.209 | 1 |
| Dctn4 | 0.001302769 | 0.307038448 | 0.406 | 0.249 | 1 |
| Tmem117 | 0.001324662 | 0.48138472 | 0.23 | 0.113 | 1 |
| Tet3 | 0.001365938 | 0.393360446 | 0.414 | 0.266 | 1 |
| Lars2 | 0.001416396 | 0.329703981 | 0.536 | 0.356 | 1 |
| Ppp3ca | 0.001430842 | -0.256527841 | 0.946 | 0.96 | 1 |
| Gpm6a | 0.001432713 | -0.343702434 | 0.791 | 0.836 | 1 |
| Focad | 0.001509675 | -0.338169527 | 0.297 | 0.446 | 1 |
| Pabpc4 | 0.001550836 | 0.256122355 | 0.113 | 0.028 | 1 |
| Wdtc1 | 0.0018044 | 0.267101688 | 0.197 | 0.085 | 1 |
| Htra1 | 0.001883474 | -0.42656616 | 0.18 | 0.299 | 1 |
| Myo1d | 0.001980774 | 0.40472771 | 0.197 | 0.09 | 1 |
| Spata5 | 0.001995886 | 0.306534824 | 0.381 | 0.243 | 1 |
| Slc24a2 | 0.002061789 | 0.623596712 | 0.481 | 0.345 | 1 |
| Wdr89 | 0.002090188 | -0.368634295 | 0.176 | 0.299 | 1 |
| Gm9843 | 0.002320466 | -0.270332111 | 0.151 | 0.277 | 1 |
| Pcm1 | 0.002327902 | -0.301587499 | 0.536 | 0.65 | 1 |
| Mical3 | 0.002410061 | 0.48716486 | 0.615 | 0.463 | 1 |
| Rnf168 | 0.002520528 | -0.344968771 | 0.088 | 0.186 | 1 |
| Gm42917 | 0.002582541 | -0.269149568 | 0.038 | 0.113 | 1 |
| C1galt1 | 0.002625644 | 0.374717411 | 0.226 | 0.113 | 1 |
| Ammecr1 | 0.002839269 | -0.34933792 | 0.205 | 0.328 | 1 |
| mt-Nd1 | 0.002870078 | -0.447010205 | 0.276 | 0.39 | 1 |
| Fam210a | 0.002918282 | -0.333523103 | 0.1 | 0.198 | 1 |
| Gm26848 | 0.003003147 | -0.387383603 | 0.573 | 0.667 | 1 |
| Luc7l2 | 0.003076641 | 0.28000306 | 0.862 | 0.78 | 1 |
| Unk | 0.003096392 | 0.337867004 | 0.247 | 0.136 | 1 |
| Srebf1 | 0.003216224 | 0.281381611 | 0.113 | 0.034 | 1 |
| Clip1 | 0.003350711 | 0.346570462 | 0.243 | 0.136 | 1 |
| Bex2 | 0.003406482 | -0.388619052 | 0.238 | 0.367 | 1 |
| Dhdds | 0.003463281 | 0.29878967 | 0.276 | 0.158 | 1 |
| Ubr3 | 0.00348533 | -0.355711459 | 0.582 | 0.706 | 1 |
| Plagl2 | 0.003780004 | -0.268874454 | 0.038 | 0.107 | 1 |
| Celf5 | 0.003795306 | -0.297460653 | 0.113 | 0.22 | 1 |
| Lmf1 | 0.003834955 | 0.32272062 | 0.197 | 0.096 | 1 |
| Itga9 | 0.004015992 | 0.501376072 | 0.577 | 0.492 | 1 |
| Klf13 | 0.004155589 | 0.392944469 | 0.251 | 0.141 | 1 |
| Gabarapl2 | 0.004251991 | -0.347884192 | 0.155 | 0.266 | 1 |
| Trmt1l | 0.004343511 | -0.279411381 | 0.197 | 0.316 | 1 |
| Smarcd1 | 0.004486615 | 0.260022729 | 0.192 | 0.09 | 1 |
| Tmem200a | 0.004589719 | -0.389086173 | 0.092 | 0.186 | 1 |
| Hs3st5 | 0.004629581 | -0.283630231 | 0.163 | 0.277 | 1 |
| Penk | 0.004674492 | -0.305785542 | 0.393 | 0.508 | 1 |
| Gm38505 | 0.004675921 | -0.437894405 | 0.695 | 0.768 | 1 |
| Ppp6r3 | 0.004702643 | -0.29506177 | 0.402 | 0.531 | 1 |
| Gm48765 | 0.004715342 | -0.294775261 | 0.079 | 0.169 | 1 |
| Dazap1 | 0.004775697 | 0.315324717 | 0.343 | 0.215 | 1 |
| Cdh10 | 0.005172467 | -0.312340544 | 0.828 | 0.881 | 1 |
| Capn15 | 0.005272949 | 0.309699969 | 0.331 | 0.203 | 1 |
| Top1 | 0.005514088 | -0.303934501 | 0.582 | 0.672 | 1 |
| Ppp1r2 | 0.005741693 | -0.37352973 | 0.268 | 0.379 | 1 |
| Cadps2 | 0.005826357 | 0.268199747 | 0.356 | 0.22 | 1 |
| Mapre2 | 0.005889204 | 0.377427656 | 0.565 | 0.418 | 1 |
| Kcnj3 | 0.006043222 | -0.582457117 | 0.397 | 0.463 | 1 |
| Mapk1 | 0.006104737 | -0.477854596 | 0.531 | 0.599 | 1 |
| Apoe | 0.006108309 | -0.358091526 | 0.59 | 0.684 | 1 |
| Patj | 0.006134044 | 0.273327881 | 0.167 | 0.079 | 1 |
| Gabarapl1 | 0.006186552 | -0.270349706 | 0.113 | 0.209 | 1 |
| Adcy1 | 0.006198627 | 0.275406107 | 0.105 | 0.034 | 1 |
| Crebbp | 0.006346806 | -0.281287122 | 0.699 | 0.757 | 1 |
| Csnk2a2 | 0.006353322 | 0.25576881 | 0.473 | 0.328 | 1 |
| Slc7a8 | 0.006650109 | -0.287668452 | 0.063 | 0.141 | 1 |
| Rab28 | 0.006688278 | 0.269339872 | 0.423 | 0.294 | 1 |
| 2210408I21Rik | 0.006712508 | 0.488173524 | 0.498 | 0.362 | 1 |
| Gm26917 | 0.006750894 | 0.332670796 | 0.364 | 0.243 | 1 |
| Ddx39b | 0.007065911 | 0.264314304 | 0.243 | 0.136 | 1 |
| Dynll1 | 0.007154749 | -0.278504195 | 0.18 | 0.299 | 1 |
| Srsf5 | 0.007252764 | 0.286683526 | 0.477 | 0.333 | 1 |
| Matr3 | 0.007300521 | -0.299949186 | 0.289 | 0.407 | 1 |
| Ngly1 | 0.00761831 | 0.264641019 | 0.255 | 0.147 | 1 |
| Ptgfrn | 0.007657684 | -0.357610499 | 0.088 | 0.169 | 1 |
| Phldb1 | 0.007682319 | 0.250657702 | 0.682 | 0.559 | 1 |
| Pdgfa | 0.007836133 | 0.280765781 | 0.13 | 0.051 | 1 |
| Usp53 | 0.008070035 | 0.28588443 | 0.23 | 0.13 | 1 |
| Abr | 0.008134406 | 0.428548356 | 0.435 | 0.311 | 1 |
| Ncor2 | 0.008214908 | 0.416280593 | 0.335 | 0.232 | 1 |
| Strbp | 0.008335182 | -0.258661934 | 0.795 | 0.842 | 1 |
| Gm26798 | 0.008525787 | -0.27232539 | 0.042 | 0.107 | 1 |
| Fam135b | 0.00862078 | -0.375284057 | 0.205 | 0.305 | 1 |
| Samd4 | 0.009045928 | 0.396747156 | 0.548 | 0.441 | 1 |
| Pcp4 | 0.009098263 | -0.380476271 | 0.506 | 0.605 | 1 |
| Gm7173 | 0.009304156 | -0.304774229 | 0.054 | 0.124 | 1 |
| Gabrb2 | 0.009309115 | -0.359238312 | 0.402 | 0.497 | 1 |
| 9130015G15Rik | 0.00957515 | -0.260776877 | 0.117 | 0.209 | 1 |
| Snca | 0.009631527 | -0.274351941 | 0.36 | 0.469 | 1 |
| Snx13 | 0.009685578 | 0.258907148 | 0.389 | 0.266 | 1 |
| Nebl | 0.009901412 | 0.274433015 | 0.669 | 0.559 | 1 |
| B230334C09Rik | 0.00991274 | -0.359653652 | 0.201 | 0.299 | 1 |
| Tfcp2 | 0.009937399 | 0.273175077 | 0.251 | 0.147 | 1 |
| Serinc1 | 0.010018891 | -0.364072288 | 0.469 | 0.559 | 1 |
| Cnrip1 | 0.010024377 | 0.27226119 | 0.339 | 0.215 | 1 |
| Crym | 0.010250579 | -0.288254506 | 0.063 | 0.136 | 1 |
| Mpv17l | 0.010475485 | 0.279200264 | 0.184 | 0.096 | 1 |
| Mertk | 0.010785936 | -0.489605975 | 0.243 | 0.35 | 1 |
| Dnah5 | 0.010831437 | 0.355018166 | 0.121 | 0.051 | 1 |
| Gpc5 | 0.010849354 | -0.268299756 | 0.879 | 0.898 | 1 |
| Csnk1g3 | 0.010993901 | -0.270859397 | 0.377 | 0.497 | 1 |
| Ugt8a | 0.011014786 | 0.256895982 | 0.515 | 0.395 | 1 |
| Fam196a | 0.011148666 | -0.283176312 | 0.209 | 0.322 | 1 |
| Gpatch2 | 0.011451122 | 0.311503576 | 0.46 | 0.339 | 1 |
| Pvt1 | 0.011456872 | 0.314814276 | 0.18 | 0.096 | 1 |
| Rsrp1 | 0.011566225 | 0.310586009 | 0.481 | 0.367 | 1 |
| Elovl6 | 0.011636978 | 0.262250462 | 0.573 | 0.446 | 1 |
| Cbarp | 0.012001334 | 0.285861272 | 0.197 | 0.107 | 1 |
| Flywch1 | 0.012027768 | 0.263073963 | 0.289 | 0.175 | 1 |
| S100a16 | 0.012223336 | 0.278995413 | 0.176 | 0.09 | 1 |
| Kifc3 | 0.012318342 | 0.271220056 | 0.176 | 0.09 | 1 |
| Ppp6r2 | 0.012328803 | -0.391394716 | 0.41 | 0.497 | 1 |
| Grin3a | 0.012352101 | -0.369518873 | 0.699 | 0.78 | 1 |
| Shisa4 | 0.012352275 | 0.338181041 | 0.356 | 0.249 | 1 |
| Uggt2 | 0.012480958 | 0.325950797 | 0.523 | 0.424 | 1 |
| Creb5 | 0.01262825 | 0.555426896 | 0.469 | 0.35 | 1 |
| Heph | 0.012736672 | -0.309985403 | 0.084 | 0.158 | 1 |
| Rheb | 0.01283469 | -0.325923802 | 0.218 | 0.316 | 1 |
| Nrg3os | 0.013018803 | -0.375402358 | 0.234 | 0.333 | 1 |
| Tulp3 | 0.013287423 | 0.316835517 | 0.243 | 0.147 | 1 |
| Abat | 0.013637789 | -0.25323865 | 0.293 | 0.401 | 1 |
| Taz | 0.013831753 | 0.297580108 | 0.163 | 0.085 | 1 |
| Nlgn2 | 0.013874229 | 0.257333395 | 0.305 | 0.198 | 1 |
| Sytl2 | 0.013879871 | 0.556497145 | 0.197 | 0.113 | 1 |
| Psmd1 | 0.013907744 | -0.269026302 | 0.28 | 0.373 | 1 |
| Dopey2 | 0.013966797 | 0.305379472 | 0.297 | 0.192 | 1 |
| Shc2 | 0.014101815 | 0.261027573 | 0.172 | 0.09 | 1 |
| Ephb2 | 0.01424759 | 0.280065781 | 0.205 | 0.113 | 1 |
| Prr14 | 0.014420574 | -0.357281152 | 0.201 | 0.305 | 1 |
| Stk38 | 0.014740119 | -0.279294538 | 0.268 | 0.384 | 1 |
| Zbtb16 | 0.014934391 | -0.323608706 | 0.146 | 0.237 | 1 |
| Asap2 | 0.01504345 | 0.343234914 | 0.397 | 0.294 | 1 |
| Trpm3 | 0.015079667 | -0.261657914 | 0.544 | 0.627 | 1 |
| Zfp322a | 0.015257803 | 0.277216898 | 0.238 | 0.147 | 1 |
| Zc3h12b | 0.015264732 | -0.277723529 | 0.335 | 0.452 | 1 |
| Gm26733 | 0.015491439 | -0.323045722 | 0.427 | 0.525 | 1 |
| Gm32036 | 0.015956226 | -0.264175682 | 0.067 | 0.136 | 1 |
| Mkl1 | 0.016015012 | 0.28230822 | 0.377 | 0.271 | 1 |
| Ankrd26 | 0.016026965 | 0.279325531 | 0.18 | 0.096 | 1 |
| Smg6 | 0.016042188 | 0.29138885 | 0.669 | 0.576 | 1 |
| Cab39 | 0.016214357 | -0.358040467 | 0.255 | 0.356 | 1 |
| Stk24 | 0.01629195 | 0.335918973 | 0.222 | 0.136 | 1 |
| Gpt2 | 0.016325241 | -0.377113848 | 0.335 | 0.429 | 1 |
| Zzef1 | 0.016338938 | 0.298331277 | 0.444 | 0.328 | 1 |
| Vapa | 0.016750252 | -0.303544007 | 0.36 | 0.469 | 1 |
| Csrp1 | 0.016926151 | 0.271500075 | 0.142 | 0.068 | 1 |
| Rpl17 | 0.017016114 | -0.259886616 | 0.063 | 0.13 | 1 |
| Arcn1 | 0.017043003 | 0.262775016 | 0.264 | 0.164 | 1 |
| Sh3rf3 | 0.017764048 | -0.336582744 | 0.31 | 0.412 | 1 |
| Prex1 | 0.017921697 | 0.309790592 | 0.577 | 0.452 | 1 |
| Ppip5k1 | 0.017938908 | -0.302496882 | 0.222 | 0.311 | 1 |
| 4930549C15Rik | 0.018251224 | -0.350846311 | 0.155 | 0.243 | 1 |
| Gm26936 | 0.01852324 | -0.352550232 | 0.293 | 0.373 | 1 |
| Etv6 | 0.018639018 | 0.388862303 | 0.548 | 0.441 | 1 |
| Mmp16 | 0.018703224 | 0.304133456 | 0.879 | 0.797 | 1 |
| Adgrb1 | 0.018716352 | 0.268211685 | 0.423 | 0.328 | 1 |
| Dapk1 | 0.018846075 | -0.287884446 | 0.142 | 0.232 | 1 |
| Iqsec1 | 0.018881734 | 0.272086102 | 0.297 | 0.192 | 1 |
| Cct3 | 0.018939703 | 0.282600248 | 0.218 | 0.13 | 1 |
| Arhgef3 | 0.019086298 | -0.406679441 | 0.247 | 0.345 | 1 |
| Magi3 | 0.019275981 | 0.28792583 | 0.372 | 0.266 | 1 |
| Rnf43 | 0.01932257 | -0.293028703 | 0.297 | 0.401 | 1 |
| Scmh1 | 0.01945268 | -0.251609417 | 0.556 | 0.655 | 1 |
| Eml1 | 0.019961116 | 0.666881755 | 0.331 | 0.243 | 1 |
| Sgsm1 | 0.020121402 | -0.258607074 | 0.218 | 0.316 | 1 |
| Kcnc1 | 0.020139916 | 0.301029361 | 0.138 | 0.068 | 1 |
| Cep170 | 0.020221805 | -0.285461661 | 0.372 | 0.469 | 1 |
| Cryl1 | 0.020307132 | 0.299217923 | 0.255 | 0.164 | 1 |
| Zfc3h1 | 0.020607566 | 0.250741424 | 0.318 | 0.226 | 1 |
| Xpr1 | 0.021003537 | -0.294034093 | 0.527 | 0.621 | 1 |
| Ppp1r12a | 0.021300085 | 0.267597456 | 0.703 | 0.627 | 1 |
| Efnb2 | 0.021388623 | -0.262064665 | 0.121 | 0.203 | 1 |
| Elovl7 | 0.02150789 | 0.266902263 | 0.243 | 0.147 | 1 |
| Abl1 | 0.021800298 | 0.348379225 | 0.331 | 0.232 | 1 |
| Spock1 | 0.021822476 | -0.342437966 | 0.197 | 0.282 | 1 |
| Map7 | 0.022068842 | 0.328990924 | 0.519 | 0.401 | 1 |
| Gm26804 | 0.022450556 | -0.263646617 | 0.561 | 0.633 | 1 |
| Ell | 0.022461764 | 0.274215735 | 0.184 | 0.107 | 1 |
| 4930587E11Rik | 0.022653395 | -0.311077258 | 0.054 | 0.113 | 1 |
| Zfyve27 | 0.022726054 | 0.251583413 | 0.159 | 0.085 | 1 |
| Vps26a | 0.022775629 | 0.267187311 | 0.184 | 0.107 | 1 |
| Bdh1 | 0.02291049 | 0.260708782 | 0.142 | 0.073 | 1 |
| Fam117b | 0.023161626 | -0.27977565 | 0.238 | 0.339 | 1 |
| Gm20275 | 0.023727779 | -0.287310388 | 0.234 | 0.328 | 1 |
| Ptpa | 0.023825349 | 0.333215281 | 0.314 | 0.22 | 1 |
| Fam19a5 | 0.023844352 | 0.324916907 | 0.64 | 0.565 | 1 |
| Sst | 0.024170444 | -0.252406416 | 0.184 | 0.277 | 1 |
| Snx9 | 0.024188942 | 0.287310547 | 0.326 | 0.22 | 1 |
| Nsg2 | 0.02426128 | -0.354287568 | 0.485 | 0.548 | 1 |
| Mag | 0.02440312 | 0.468574807 | 0.243 | 0.147 | 1 |
| Strn4 | 0.024634531 | 0.256695668 | 0.301 | 0.209 | 1 |
| Vezt | 0.024707631 | 0.251671395 | 0.435 | 0.322 | 1 |
| Gm48678 | 0.024788392 | -0.462625135 | 0.314 | 0.395 | 1 |
| Sfswap | 0.02504787 | 0.258588243 | 0.485 | 0.379 | 1 |
| Rit1.1 | 0.025194537 | -0.29500634 | 0.322 | 0.418 | 1 |
| Dgkz | 0.025261276 | 0.257919931 | 0.126 | 0.062 | 1 |
| Plekha1 | 0.025499098 | 0.529339593 | 0.335 | 0.249 | 1 |
| Grb14 | 0.025641493 | -0.278464831 | 0.326 | 0.424 | 1 |
| Mobp | 0.025785091 | 0.617028673 | 0.176 | 0.102 | 1 |
| Rcan3 | 0.026553427 | -0.265601942 | 0.109 | 0.181 | 1 |
| Micu1 | 0.026729417 | 0.263714082 | 0.452 | 0.345 | 1 |
| Zufsp | 0.026854756 | 0.251169479 | 0.289 | 0.192 | 1 |
| Zfp507 | 0.027139085 | 0.294843116 | 0.159 | 0.09 | 1 |
| Phf24 | 0.027377715 | -0.254331026 | 0.142 | 0.226 | 1 |
| Gm37679 | 0.027579021 | -0.270869373 | 0.192 | 0.277 | 1 |
| Clmn | 0.027992035 | 0.314850295 | 0.117 | 0.056 | 1 |
| Dcaf17 | 0.028019888 | 0.26264469 | 0.247 | 0.164 | 1 |
| Neu4 | 0.028597112 | 0.279674356 | 0.46 | 0.362 | 1 |
| Fzd3 | 0.029128032 | -0.261752916 | 0.259 | 0.35 | 1 |
| Hsph1 | 0.029196908 | -0.287930148 | 0.184 | 0.266 | 1 |
| Supt5 | 0.02919871 | 0.273276246 | 0.205 | 0.13 | 1 |
| Plk2 | 0.02927508 | -0.322244736 | 0.134 | 0.209 | 1 |
| Matk | 0.029499425 | 0.252717872 | 0.18 | 0.107 | 1 |
| Glis1 | 0.029546227 | 0.331433393 | 0.146 | 0.079 | 1 |
| Fam19a1 | 0.029549356 | -0.371446337 | 0.523 | 0.616 | 1 |
| Napb | 0.029550292 | -0.282933714 | 0.209 | 0.299 | 1 |
| Setd7 | 0.029704719 | 0.27111171 | 0.36 | 0.26 | 1 |
| Phka1 | 0.030068298 | -0.371812837 | 0.431 | 0.508 | 1 |
| Adamtsl1 | 0.0301129 | 0.276173154 | 0.134 | 0.068 | 1 |
| Lgi3 | 0.030985635 | 0.281970019 | 0.159 | 0.09 | 1 |
| Phlpp1 | 0.031016954 | 0.291407928 | 0.833 | 0.814 | 1 |
| Ift43 | 0.031223111 | 0.255054245 | 0.176 | 0.107 | 1 |
| Fa2h | 0.031262049 | 0.350813076 | 0.406 | 0.311 | 1 |
| Map7d2 | 0.031343896 | -0.2654175 | 0.314 | 0.412 | 1 |
| Ckap5 | 0.031549295 | -0.302680858 | 0.356 | 0.441 | 1 |
| Ubb | 0.032038514 | -0.283520211 | 0.577 | 0.638 | 1 |
| Dtd1 | 0.032264293 | 0.292226409 | 0.385 | 0.294 | 1 |
| Chst8 | 0.032349468 | 0.286384687 | 0.167 | 0.096 | 1 |
| Hnrnpk | 0.032419122 | -0.297431209 | 0.276 | 0.362 | 1 |
| Spon1 | 0.032480743 | 0.261055899 | 0.782 | 0.712 | 1 |
| Usp50 | 0.033015232 | -0.25715115 | 0.155 | 0.232 | 1 |
| P2ry12 | 0.033060067 | -0.258390809 | 0.105 | 0.175 | 1 |
| Pitpnc1 | 0.033283562 | -0.27961604 | 0.494 | 0.588 | 1 |
| Prima1 | 0.033734058 | 0.316181083 | 0.105 | 0.051 | 1 |
| Rimbp2 | 0.034076284 | -0.303707701 | 0.226 | 0.305 | 1 |
| Nisch | 0.03408377 | 0.251039054 | 0.527 | 0.429 | 1 |
| St13 | 0.034531024 | -0.297139593 | 0.28 | 0.362 | 1 |
| Plekhg3 | 0.034676708 | 0.272333787 | 0.13 | 0.068 | 1 |
| Prrc2a | 0.035154302 | -0.291120764 | 0.13 | 0.203 | 1 |
| Cxxc4 | 0.03632112 | -0.252326577 | 0.18 | 0.266 | 1 |
| Med27 | 0.036637248 | 0.263283459 | 0.356 | 0.26 | 1 |
| Srbd1 | 0.037000401 | 0.282345785 | 0.226 | 0.153 | 1 |
| Slc25a4 | 0.037169397 | -0.28917052 | 0.305 | 0.395 | 1 |
| Dcun1d5 | 0.037224912 | -0.261987206 | 0.205 | 0.282 | 1 |
| Bcl6 | 0.037711595 | -0.414042179 | 0.176 | 0.254 | 1 |
| Fam19a4 | 0.037802656 | -0.300173985 | 0.172 | 0.249 | 1 |
| Etv4 | 0.038344418 | 0.328410348 | 0.402 | 0.328 | 1 |
| Grik3 | 0.038996171 | 0.287493227 | 0.515 | 0.418 | 1 |
| Ptprb | 0.038997879 | 0.3299573 | 0.105 | 0.051 | 1 |
| 2900055J20Rik | 0.039153546 | -0.267000126 | 0.05 | 0.102 | 1 |
| Kdm5c | 0.039235037 | 0.251156772 | 0.301 | 0.215 | 1 |
| Yes1 | 0.039364362 | 0.266887057 | 0.247 | 0.169 | 1 |
| Tubb2a | 0.039934587 | 0.284460277 | 0.205 | 0.13 | 1 |
| Usp54 | 0.039939046 | -0.27076613 | 0.276 | 0.362 | 1 |
| Arhgap23 | 0.04006406 | 0.331911337 | 0.343 | 0.254 | 1 |
| Fnbp1l | 0.040247044 | -0.275858124 | 0.238 | 0.311 | 1 |
| Megf11 | 0.040275701 | 0.255488569 | 0.799 | 0.763 | 1 |
| Rassf8 | 0.040720859 | 0.297455698 | 0.285 | 0.203 | 1 |
| Itpk1 | 0.040920289 | 0.262522984 | 0.218 | 0.141 | 1 |
| Atp5g1 | 0.04129322 | -0.293538196 | 0.092 | 0.153 | 1 |
| Hdac4 | 0.041902117 | 0.301832706 | 0.322 | 0.243 | 1 |
| Kif19a | 0.042233638 | 0.319646916 | 0.18 | 0.113 | 1 |
| Caap1 | 0.042260751 | -0.262750994 | 0.155 | 0.226 | 1 |
| Rpl27-ps3 | 0.042674191 | -0.252721637 | 0.096 | 0.158 | 1 |
| Pde1c | 0.043138649 | -0.330000391 | 0.485 | 0.525 | 1 |
| Hivep3 | 0.043151024 | -0.270604811 | 0.159 | 0.232 | 1 |
| Gak | 0.04376343 | -0.314522935 | 0.243 | 0.311 | 1 |
| AY036118 | 0.043859379 | -0.275955408 | 0.397 | 0.458 | 1 |
| Dpf3 | 0.044284752 | -0.336355772 | 0.255 | 0.328 | 1 |
| Abhd17b | 0.045470849 | -0.264195946 | 0.561 | 0.644 | 1 |
| Gm47271 | 0.045825706 | -0.283438189 | 0.226 | 0.311 | 1 |
| Zfp536 | 0.046138444 | 0.467325319 | 0.54 | 0.463 | 1 |
| Frrs1l | 0.046213173 | 0.300804192 | 0.293 | 0.215 | 1 |
| Abhd18 | 0.046488948 | -0.254672188 | 0.393 | 0.469 | 1 |
| Atp5h | 0.047317009 | -0.268793391 | 0.096 | 0.158 | 1 |
| Sub1 | 0.048816748 | -0.361026161 | 0.159 | 0.226 | 1 |
| Brcc3 | 0.049149442 | -0.258984703 | 0.084 | 0.141 | 1 |
| Maml2 | 0.050168014 | -0.267426294 | 0.946 | 0.966 | 1 |
| 1700111E14Rik | 0.050218882 | -0.254720336 | 0.117 | 0.181 | 1 |
| Ftx | 0.050600113 | -0.281931194 | 0.264 | 0.345 | 1 |
| Gm15577 | 0.051089651 | -0.334527362 | 0.071 | 0.124 | 1 |
| Gm26904 | 0.051348949 | -0.341688892 | 0.364 | 0.412 | 1 |
| Ppm1l | 0.052247157 | -0.301942462 | 0.502 | 0.559 | 1 |
| Cntrl | 0.052575567 | -0.273898111 | 0.146 | 0.215 | 1 |
| Stk32a | 0.052678012 | -0.264056718 | 0.611 | 0.661 | 1 |
| Rgcc | 0.053273031 | -0.316560342 | 0.414 | 0.508 | 1 |
| Prkd1 | 0.053558084 | -0.313846233 | 0.481 | 0.542 | 1 |
| Arhgef10l | 0.054957461 | 0.300565009 | 0.431 | 0.356 | 1 |
| Trim37 | 0.055177892 | -0.301602022 | 0.184 | 0.249 | 1 |
| Gm26836 | 0.055304618 | -0.282128134 | 0.23 | 0.305 | 1 |
| Tardbp | 0.055701212 | 0.261927804 | 0.301 | 0.226 | 1 |
| Snx24 | 0.055862065 | -0.288951454 | 0.289 | 0.362 | 1 |
| Mrps28 | 0.056303456 | 0.252443778 | 0.197 | 0.13 | 1 |
| Gm15584 | 0.056337973 | -0.324831881 | 0.159 | 0.226 | 1 |
| Lrp8 | 0.056876342 | 0.252033536 | 0.18 | 0.113 | 1 |
| Chst9 | 0.057228204 | -0.391924952 | 0.126 | 0.192 | 1 |
| Cavin4 | 0.057616951 | 0.258487288 | 0.163 | 0.102 | 1 |
| Disc1 | 0.058714146 | 0.289911245 | 0.243 | 0.169 | 1 |
| Id4 | 0.059180246 | -0.332178832 | 0.172 | 0.232 | 1 |
| Fxr2 | 0.059264414 | 0.26261213 | 0.222 | 0.153 | 1 |
| Prickle2 | 0.059280598 | 0.281673118 | 0.72 | 0.61 | 1 |
| Itpr1 | 0.059317591 | -0.312439645 | 0.318 | 0.395 | 1 |
| Zfp846 | 0.059879853 | 0.271419592 | 0.188 | 0.124 | 1 |
| Slc16a2 | 0.060206118 | -0.25498121 | 0.138 | 0.203 | 1 |
| Ostm1 | 0.060263187 | -0.259238437 | 0.155 | 0.22 | 1 |
| Mphosph9 | 0.060343094 | 0.253084583 | 0.381 | 0.299 | 1 |
| 5730559C18Rik | 0.060469462 | 0.295393656 | 0.335 | 0.249 | 1 |
| Olfm2 | 0.06148409 | 0.257607229 | 0.456 | 0.379 | 1 |
| Prom1 | 0.061748818 | 0.27469973 | 0.109 | 0.056 | 1 |
| Gm45323 | 0.061777636 | -0.250603967 | 0.109 | 0.169 | 1 |
| Tanc1 | 0.061910323 | 0.265167532 | 0.552 | 0.492 | 1 |
| Igsf9b | 0.062004576 | -0.289884466 | 0.347 | 0.424 | 1 |
| Araf | 0.063189221 | -0.254637603 | 0.372 | 0.469 | 1 |
| Ltbp1 | 0.063282999 | -0.283883894 | 0.331 | 0.407 | 1 |
| Gm15563 | 0.063802904 | -0.344029672 | 0.146 | 0.203 | 1 |
| Rnf111 | 0.064689563 | -0.265187475 | 0.293 | 0.367 | 1 |
| Fam222b | 0.064828513 | -0.251428643 | 0.531 | 0.588 | 1 |
| Man2a2 | 0.066574994 | 0.29002266 | 0.377 | 0.311 | 1 |
| Mipep | 0.066781847 | -0.288951049 | 0.079 | 0.13 | 1 |
| Bod1l | 0.067124662 | 0.306710824 | 0.36 | 0.288 | 1 |
| Rtl4 | 0.068219753 | -0.267075654 | 0.527 | 0.593 | 1 |
| Cisd1 | 0.068920398 | -0.266279582 | 0.079 | 0.13 | 1 |
| 4932443L11Rik | 0.069215158 | -0.287852047 | 0.502 | 0.571 | 1 |
| Plcl2 | 0.070173626 | -0.259098268 | 0.218 | 0.282 | 1 |
| Slc39a10 | 0.070401024 | -0.25984454 | 0.142 | 0.203 | 1 |
| Afg1l | 0.072202594 | -0.28122062 | 0.259 | 0.328 | 1 |
| Srgap3 | 0.072292007 | 0.279059061 | 0.628 | 0.593 | 1 |
| Gm10073 | 0.072458016 | -0.307251442 | 0.092 | 0.141 | 1 |
| Slc38a1 | 0.073229294 | 0.319952642 | 0.163 | 0.107 | 1 |
| Vti1a | 0.075173309 | 0.25766026 | 0.674 | 0.571 | 1 |
| Qser1 | 0.075578499 | 0.254373046 | 0.259 | 0.186 | 1 |
| 2610035D17Rik | 0.076826136 | 0.334174942 | 0.778 | 0.763 | 1 |
| Arhgap24 | 0.077243846 | -0.343199708 | 0.54 | 0.582 | 1 |
| Hspa5 | 0.078496408 | -0.261180257 | 0.192 | 0.254 | 1 |
| Atp1a2 | 0.079030385 | -0.274546107 | 0.477 | 0.542 | 1 |
| Eif4a1 | 0.07967281 | -0.329229563 | 0.18 | 0.232 | 1 |
| Maml3 | 0.079885471 | 0.365782528 | 0.372 | 0.305 | 1 |
| Olfm3 | 0.080366254 | -0.265220498 | 0.205 | 0.277 | 1 |
| Clasp1 | 0.080441135 | 0.255322362 | 0.544 | 0.475 | 1 |
| Faf2 | 0.080983868 | 0.303235499 | 0.272 | 0.203 | 1 |
| Syt1 | 0.081121894 | -0.420840306 | 0.686 | 0.695 | 1 |
| Magi1.1 | 0.081128729 | 0.643737327 | 0.268 | 0.198 | 1 |
| Gm35188 | 0.081178684 | -0.404804804 | 0.251 | 0.316 | 1 |
| 4930555F03Rik | 0.081340719 | -0.450938895 | 0.096 | 0.147 | 1 |
| Iqgap2 | 0.081426836 | -0.329885591 | 0.209 | 0.271 | 1 |
| Tshz2 | 0.081750127 | 0.256922548 | 0.523 | 0.458 | 1 |
| Ndufaf7 | 0.081976094 | -0.276611729 | 0.167 | 0.226 | 1 |
| Mblac2 | 0.082134805 | 0.255724365 | 0.238 | 0.175 | 1 |
| Chd3 | 0.082378128 | 0.389083344 | 0.343 | 0.266 | 1 |
| Pofut1 | 0.082542522 | -0.295362045 | 0.176 | 0.237 | 1 |
| Gm15283 | 0.082904694 | -0.282510482 | 0.126 | 0.181 | 1 |
| Gm12394 | 0.083308515 | -0.258997699 | 0.163 | 0.226 | 1 |
| Gm16183 | 0.083713758 | -0.282909245 | 0.071 | 0.119 | 1 |
| Airn | 0.083774971 | 0.280004566 | 0.238 | 0.175 | 1 |
| Grm3 | 0.083945578 | -0.487314807 | 0.255 | 0.311 | 1 |
| Hpca | 0.084028309 | -0.266271572 | 0.213 | 0.277 | 1 |
| E130114P18Rik | 0.084506278 | -0.338935295 | 0.36 | 0.424 | 1 |
| Cd99l2 | 0.084915679 | -0.265774931 | 0.138 | 0.198 | 1 |
| Sptbn4 | 0.085451344 | -0.255462955 | 0.176 | 0.243 | 1 |
| Abca2 | 0.086187793 | 0.280341391 | 0.222 | 0.158 | 1 |
| Sumo2 | 0.086372209 | -0.265797375 | 0.301 | 0.373 | 1 |
| Sh3gl2 | 0.086415991 | -0.250105835 | 0.343 | 0.412 | 1 |
| Gm27003 | 0.088534539 | 0.277405602 | 0.138 | 0.09 | 1 |
| Ralgapa1 | 0.089331347 | 0.276378641 | 0.715 | 0.706 | 1 |
| Sec23b | 0.091087989 | 0.312062732 | 0.134 | 0.085 | 1 |
| Sik2 | 0.092086706 | 0.257234894 | 0.502 | 0.435 | 1 |
| Atp2c1 | 0.093747197 | -0.275363418 | 0.381 | 0.429 | 1 |
| Gm15738 | 0.093854516 | -0.265218307 | 0.159 | 0.22 | 1 |
| Nyap2 | 0.094015385 | -0.252712503 | 0.176 | 0.232 | 1 |
| Rpl41 | 0.094821274 | -0.289155647 | 0.205 | 0.266 | 1 |
| Frmd3 | 0.094947378 | -0.290818493 | 0.218 | 0.282 | 1 |
| Flnb | 0.095211978 | 0.358743345 | 0.381 | 0.316 | 1 |
| Ube3c | 0.095879896 | -0.262049831 | 0.536 | 0.565 | 1 |
| Cdk5rap2 | 0.096076894 | 0.301827785 | 0.381 | 0.316 | 1 |
| Smad7 | 0.096090633 | 0.437966194 | 0.251 | 0.192 | 1 |
| Tbl1x | 0.096844505 | -0.251850926 | 0.477 | 0.537 | 1 |
| Ralgps1 | 0.096971506 | 0.250076404 | 0.452 | 0.39 | 1 |
| Sipa1l1 | 0.099188977 | -0.310859213 | 0.515 | 0.559 | 1 |
| Wdr17 | 0.099895365 | -0.331330941 | 0.431 | 0.492 | 1 |
| Slc44a5 | 0.103008582 | 0.26309329 | 0.41 | 0.339 | 1 |
| Cdk17 | 0.103324422 | -0.304793174 | 0.423 | 0.475 | 1 |
| Egfem1 | 0.103398676 | -0.25824789 | 0.703 | 0.74 | 1 |
| Zcchc24 | 0.103637955 | 0.274324894 | 0.506 | 0.458 | 1 |
| Cldn11 | 0.104070869 | 0.407140179 | 0.264 | 0.209 | 1 |
| Zfp157 | 0.105744299 | 0.255011811 | 0.297 | 0.232 | 1 |
| Rnf220 | 0.108111325 | 0.496454931 | 0.272 | 0.215 | 1 |
| Tbc1d5 | 0.109839247 | 0.251298745 | 0.762 | 0.723 | 1 |
| Mcph1 | 0.112034625 | -0.256222162 | 0.213 | 0.277 | 1 |
| Nckap5 | 0.113937274 | 0.33133345 | 0.971 | 0.944 | 1 |
| Secisbp2l | 0.115518945 | 0.270888615 | 0.31 | 0.249 | 1 |
| Eef2 | 0.116295498 | -0.353974783 | 0.134 | 0.181 | 1 |
| Akap5 | 0.120226596 | -0.257897037 | 0.13 | 0.181 | 1 |
| Sema3a | 0.12075172 | -0.286300647 | 0.1 | 0.147 | 1 |
| Pcdh19 | 0.123507765 | 0.289173812 | 0.251 | 0.192 | 1 |
| Npdc1 | 0.127654019 | -0.250047717 | 0.109 | 0.153 | 1 |
| Erp44 | 0.128866237 | -0.263856133 | 0.222 | 0.271 | 1 |
| Kirrel3 | 0.13200707 | 0.453952478 | 0.791 | 0.757 | 1 |
| Zfand5 | 0.132103365 | -0.251577138 | 0.251 | 0.311 | 1 |
| Kif21a | 0.135193934 | 0.34631469 | 0.318 | 0.271 | 1 |
| Dars | 0.13619915 | 0.283069821 | 0.247 | 0.198 | 1 |
| Wasf2 | 0.138238585 | -0.251635841 | 0.192 | 0.249 | 1 |
| Rbfox3 | 0.140177846 | -0.266047718 | 0.13 | 0.175 | 1 |
| Stxbp1 | 0.143145451 | -0.260729064 | 0.31 | 0.356 | 1 |
| Uvrag | 0.145404678 | 0.288318155 | 0.452 | 0.373 | 1 |
| Hacd3 | 0.145607656 | 0.273293949 | 0.28 | 0.232 | 1 |
| Frmd4b | 0.152319972 | 0.35879389 | 0.255 | 0.203 | 1 |
| Gkap1 | 0.155317149 | 0.265442525 | 0.347 | 0.294 | 1 |
| Cdk19 | 0.158646674 | 0.282306256 | 0.506 | 0.469 | 1 |
| Tmem158 | 0.15982069 | -0.304750011 | 0.213 | 0.254 | 1 |
| Tiparp | 0.160775114 | -0.256901573 | 0.159 | 0.203 | 1 |
| Rsbn1l | 0.166309614 | 0.250327939 | 0.381 | 0.316 | 1 |
| Bmt2 | 0.167225544 | 0.251814455 | 0.314 | 0.266 | 1 |
| Reln | 0.168520708 | -0.269076412 | 0.113 | 0.153 | 1 |
| Smc6 | 0.174749066 | -0.259545093 | 0.264 | 0.311 | 1 |
| Tspan9 | 0.17536029 | 0.262890948 | 0.205 | 0.158 | 1 |
| Gm29514 | 0.175361013 | -0.363065347 | 0.381 | 0.412 | 1 |
| Gm38304 | 0.176243671 | -0.273650176 | 0.418 | 0.452 | 1 |
| Mctp1 | 0.177790952 | -0.277720859 | 0.351 | 0.407 | 1 |
| Cspg4 | 0.183054168 | 0.258695564 | 0.586 | 0.542 | 1 |
| Pkp4 | 0.18600297 | 0.281716349 | 0.506 | 0.446 | 1 |
| Ano3 | 0.197685166 | -0.279440357 | 0.381 | 0.424 | 1 |
| Hsp90ab1 | 0.208242425 | -0.268197628 | 0.36 | 0.395 | 1 |
| Sema4d | 0.21124734 | 0.383268373 | 0.331 | 0.277 | 1 |
| Kcnq5 | 0.22461822 | -0.285989563 | 0.854 | 0.853 | 1 |
| Kndc1 | 0.225110731 | 0.361908592 | 0.151 | 0.113 | 1 |
| Carmil1 | 0.229164114 | 0.349374231 | 0.481 | 0.441 | 1 |
| Adgrv1 | 0.238161574 | -0.259094007 | 0.238 | 0.277 | 1 |
| Gm11149 | 0.241860421 | -0.273643502 | 0.506 | 0.52 | 1 |
| Ptn | 0.244980891 | -0.254649191 | 0.669 | 0.655 | 1 |
| Cyp2j6 | 0.250051049 | -0.251695956 | 0.289 | 0.316 | 1 |
| CT009510.2 | 0.250884522 | 0.353878449 | 0.31 | 0.26 | 1 |
| Tmem2 | 0.269190123 | 0.710406991 | 0.159 | 0.124 | 1 |
| Sesn1 | 0.31132329 | -0.302107257 | 0.314 | 0.339 | 1 |
| Fam69a | 0.320201796 | 0.262502899 | 0.234 | 0.209 | 1 |
| Meis2 | 0.326693612 | -0.256015811 | 0.636 | 0.616 | 1 |
| Dip2b | 0.331080253 | 0.343305149 | 0.49 | 0.441 | 1 |
| Nfasc | 0.336863085 | 0.392755637 | 0.623 | 0.576 | 1 |
| Rras2 | 0.358509574 | 0.294787309 | 0.172 | 0.141 | 1 |
| Zbtb7a | 0.370287208 | -0.253720179 | 0.142 | 0.169 | 1 |
| Wdr44 | 0.378271796 | -0.275502183 | 0.188 | 0.209 | 1 |
| Nkain2 | 0.406588103 | 0.442321664 | 0.762 | 0.751 | 1 |
| Kcnip4 | 0.414657883 | -0.292906426 | 0.912 | 0.819 | 1 |
| Sema6a | 0.425849185 | 0.262030467 | 0.619 | 0.593 | 1 |
| Mbp | 0.517152022 | 0.663887657 | 0.397 | 0.373 | 1 |
| Tenm3 | 0.520110909 | -0.292447096 | 0.439 | 0.441 | 1 |
| Kcnh7 | 0.53965972 | -0.284189044 | 0.397 | 0.401 | 1 |
| Arhgef28 | 0.544086463 | 0.282245007 | 0.527 | 0.531 | 1 |
| Zfp804a | 0.557117714 | -0.338607716 | 0.494 | 0.497 | 1 |
| Ablim2 | 0.578376397 | 0.250562572 | 0.247 | 0.294 | 1 |
| Ephb1 | 0.60148859 | 0.250885102 | 0.402 | 0.373 | 1 |
| Mgat4c | 0.63106867 | -0.358185683 | 0.418 | 0.412 | 1 |
| Synpr | 0.717632437 | 0.263642324 | 0.176 | 0.198 | 1 |
| Slit2 | 0.76146638 | 0.3335648 | 0.188 | 0.175 | 1 |
| Gas7 | 0.79697046 | 0.285488157 | 0.243 | 0.266 | 1 |
| Sema3e | 0.865326654 | -0.270501364 | 0.293 | 0.277 | 1 |
| Pex5l | 0.911796546 | 0.417522101 | 0.343 | 0.35 | 1 |

| **Supplemental Table S4. Differentially expressed genes in each cell type generated comparing the control and the mTBI SVZ, related to Figure 2. (Oligodendrocyte DEGs)** | | | | | |
| --- | --- | --- | --- | --- | --- |
| Column1 | p_val | avg_log2FC | pct.1 | pct.2 | p_val_adj |
| Gm42418 | 2.56581E-94 | 0.608555765 | 1 | 0.997 | 5.82772E-90 |
| Zbtb16 | 7.69255E-41 | -1.017631132 | 0.135 | 0.364 | 1.74721E-36 |
| Fnbp1 | 3.03612E-33 | 0.417374528 | 0.976 | 0.946 | 6.89593E-29 |
| Sgk1 | 2.8144E-28 | -0.868832991 | 0.147 | 0.335 | 6.39234E-24 |
| Kcnip4 | 1.50944E-26 | 0.429855954 | 0.861 | 0.728 | 3.42838E-22 |
| Neat1 | 1.71015E-26 | 0.722463424 | 0.643 | 0.437 | 3.88426E-22 |
| Tmod2 | 3.25867E-24 | -0.559429376 | 0.666 | 0.801 | 7.40142E-20 |
| Tac1 | 1.12971E-21 | -0.640221446 | 0.245 | 0.427 | 2.5659E-17 |
| Fkbp5 | 1.64599E-20 | -0.709044296 | 0.083 | 0.215 | 3.73854E-16 |
| Aatk | 1.7518E-19 | 0.474445224 | 0.772 | 0.647 | 3.97886E-15 |
| Cmss1 | 1.82477E-19 | 0.368792001 | 0.898 | 0.812 | 4.1446E-15 |
| Zfand4 | 3.7042E-16 | -0.588273934 | 0.066 | 0.171 | 8.41335E-12 |
| Htra1 | 7.15143E-16 | -0.532035413 | 0.083 | 0.196 | 1.6243E-11 |
| Adipor2 | 1.06878E-15 | -0.516074121 | 0.535 | 0.671 | 2.42752E-11 |
| Nrbp2 | 1.19855E-15 | 0.536526536 | 0.578 | 0.428 | 2.72227E-11 |
| Calm2 | 2.33033E-15 | -0.423085611 | 0.627 | 0.747 | 5.29289E-11 |
| Rcan2 | 8.39482E-15 | -0.511690128 | 0.427 | 0.558 | 1.90671E-10 |
| Mat2a | 5.56868E-14 | -0.496441645 | 0.347 | 0.506 | 1.26481E-09 |
| AC149090.1 | 9.46596E-14 | 0.495314397 | 0.165 | 0.057 | 2.15E-09 |
| Gria4 | 2.33678E-13 | 0.497880006 | 0.65 | 0.528 | 5.30753E-09 |
| Arid5b | 6.80096E-13 | -0.53130813 | 0.256 | 0.395 | 1.5447E-08 |
| Gpm6a | 7.65259E-13 | -0.425495475 | 0.517 | 0.662 | 1.73813E-08 |
| Meis2 | 1.58938E-12 | -0.484582681 | 0.409 | 0.547 | 3.60995E-08 |
| Penk | 4.44406E-12 | -0.443875274 | 0.384 | 0.529 | 1.00938E-07 |
| Hsph1 | 4.69188E-12 | -0.459286848 | 0.119 | 0.227 | 1.06567E-07 |
| Ssh2 | 1.18961E-11 | -0.319858752 | 0.825 | 0.892 | 2.70196E-07 |
| Mobp | 1.51474E-11 | -0.313270308 | 0.868 | 0.911 | 3.44043E-07 |
| Arpp21 | 9.92698E-11 | -0.460672831 | 0.381 | 0.499 | 2.25472E-06 |
| Phldb1 | 1.42639E-10 | 0.312573243 | 0.812 | 0.727 | 3.23975E-06 |
| Shisa4 | 1.87499E-10 | 0.452295246 | 0.407 | 0.29 | 4.25867E-06 |
| Creb5 | 5.48455E-10 | 0.300801608 | 0.686 | 0.574 | 1.24571E-05 |
| Mag | 7.62827E-10 | 0.346883281 | 0.762 | 0.704 | 1.73261E-05 |
| Man1a | 9.0928E-10 | -0.517909529 | 0.339 | 0.45 | 2.06525E-05 |
| Opalin | 9.52528E-10 | 0.441456085 | 0.541 | 0.432 | 2.16348E-05 |
| Bcas1 | 9.88249E-10 | 0.29787858 | 0.799 | 0.724 | 2.24461E-05 |
| 5033421B08Rik | 1.78295E-09 | 0.670458873 | 0.132 | 0.053 | 4.0496E-05 |
| Npas3 | 2.19083E-09 | 0.420505962 | 0.653 | 0.548 | 4.97603E-05 |
| Gm26694 | 2.58808E-09 | -0.384216631 | 0.439 | 0.553 | 5.8783E-05 |
| Gpr88 | 4.35775E-09 | -0.381891016 | 0.452 | 0.567 | 9.89775E-05 |
| Camk1d | 1.11286E-08 | 0.345950204 | 0.607 | 0.5 | 0.000252764 |
| 4932443L11Rik | 1.15206E-08 | -0.391799344 | 0.159 | 0.256 | 0.000261667 |
| Ppp1r2 | 1.54987E-08 | -0.333415848 | 0.244 | 0.356 | 0.000352023 |
| Gm48678 | 2.01909E-08 | -0.436363724 | 0.456 | 0.562 | 0.000458597 |
| Ddr1 | 2.03404E-08 | 0.355477566 | 0.536 | 0.426 | 0.000461992 |
| Samd4 | 2.29132E-08 | 0.347466879 | 0.471 | 0.355 | 0.000520427 |
| Arsg | 2.38108E-08 | 0.359539495 | 0.421 | 0.301 | 0.000540814 |
| Unc5c | 2.76104E-08 | -0.255298541 | 0.897 | 0.927 | 0.000627116 |
| Gria2 | 4.96676E-08 | -0.28034335 | 0.679 | 0.753 | 0.001128099 |
| Echdc1 | 6.45787E-08 | -0.305388894 | 0.079 | 0.151 | 0.001466775 |
| Epb41l3 | 6.53416E-08 | 0.330299116 | 0.647 | 0.558 | 0.001484103 |
| Ubb | 7.15756E-08 | -0.31188986 | 0.558 | 0.659 | 0.001625697 |
| Sept4 | 7.60723E-08 | 0.309131656 | 0.662 | 0.558 | 0.00172783 |
| mt-Co3 | 7.93974E-08 | -0.412375013 | 0.654 | 0.738 | 0.001803352 |
| Zfp804b | 8.12974E-08 | 0.338164702 | 0.11 | 0.044 | 0.001846507 |
| A330049N07Rik | 8.36004E-08 | 0.39647923 | 0.484 | 0.382 | 0.001898817 |
| Plk2 | 9.55051E-08 | -0.319462323 | 0.093 | 0.169 | 0.002169208 |
| Plekhh1 | 9.78133E-08 | 0.276468887 | 0.746 | 0.659 | 0.002221635 |
| Xrcc6 | 1.22682E-07 | -0.304517186 | 0.34 | 0.455 | 0.002786469 |
| Chn2 | 1.28081E-07 | -0.337682953 | 0.324 | 0.427 | 0.002909113 |
| Tmsb4x | 1.78275E-07 | -0.313797941 | 0.501 | 0.581 | 0.004049149 |
| Adamts2 | 2.08557E-07 | 0.407863702 | 0.219 | 0.131 | 0.004736945 |
| 5031439G07Rik | 2.13672E-07 | 0.269037016 | 0.636 | 0.545 | 0.004853137 |
| Drd1 | 2.33778E-07 | -0.309717156 | 0.166 | 0.256 | 0.005309796 |
| Hspa8 | 3.08296E-07 | -0.30974992 | 0.368 | 0.479 | 0.007002331 |
| Hcn2 | 3.24957E-07 | 0.446518218 | 0.169 | 0.094 | 0.007380747 |
| Atp5o | 3.36312E-07 | -0.332720223 | 0.118 | 0.195 | 0.007638666 |
| Lars2 | 3.76968E-07 | 0.347727808 | 0.405 | 0.305 | 0.008562081 |
| Gm28376 | 4.09584E-07 | -0.376350879 | 0.36 | 0.452 | 0.009302881 |
| Snrnp70 | 4.13995E-07 | 0.313891339 | 0.561 | 0.475 | 0.009403066 |
| Gm44686 | 4.28409E-07 | -0.342509387 | 0.146 | 0.228 | 0.009730455 |
| Sytl2 | 4.78992E-07 | 0.25512194 | 0.696 | 0.617 | 0.010879354 |
| mt-Atp6 | 5.14875E-07 | -0.391093171 | 0.658 | 0.727 | 0.01169436 |
| Alcam | 5.3423E-07 | -0.316136904 | 0.469 | 0.563 | 0.012133958 |
| Clic4 | 6.16384E-07 | 0.314199118 | 0.544 | 0.452 | 0.013999938 |
| Kcnc2 | 6.63212E-07 | 0.349346968 | 0.108 | 0.047 | 0.015063541 |
| Josd2 | 9.55752E-07 | 0.390553944 | 0.258 | 0.174 | 0.021707994 |
| Nsg2 | 9.77956E-07 | -0.26690395 | 0.39 | 0.509 | 0.022212305 |
| Map7d2 | 1.01875E-06 | -0.406561439 | 0.159 | 0.236 | 0.023138786 |
| Gatm | 1.05659E-06 | 0.257401487 | 0.698 | 0.623 | 0.023998336 |
| Kansl1l | 1.76573E-06 | -0.276311978 | 0.338 | 0.44 | 0.040104977 |
| Naaladl2 | 1.76634E-06 | 0.290085253 | 0.753 | 0.666 | 0.040118781 |
| 1700047M11Rik | 1.88804E-06 | 0.327512264 | 0.457 | 0.368 | 0.042883037 |
| Glp2r | 2.03965E-06 | -0.256741978 | 0.194 | 0.283 | 0.046326458 |
| Grik1 | 2.33555E-06 | 0.422414244 | 0.255 | 0.171 | 0.053047391 |
| Pvt1 | 2.34241E-06 | 0.373236825 | 0.277 | 0.189 | 0.053203188 |
| 4930419G24Rik | 2.46823E-06 | -0.379217389 | 0.452 | 0.533 | 0.056060813 |
| Hapln2 | 2.78407E-06 | 0.369006719 | 0.332 | 0.243 | 0.063234618 |
| Gm29237 | 3.0767E-06 | -0.303335249 | 0.167 | 0.247 | 0.069880974 |
| Pllp | 3.08558E-06 | 0.370322956 | 0.251 | 0.17 | 0.070082849 |
| Ptn | 3.22495E-06 | -0.265907534 | 0.68 | 0.751 | 0.073248319 |
| Dnaja1 | 3.38378E-06 | -0.297848019 | 0.116 | 0.186 | 0.076855907 |
| C1qtnf4 | 3.61614E-06 | -0.304810478 | 0.199 | 0.283 | 0.082133429 |
| Dgkb | 4.03794E-06 | -0.319766647 | 0.567 | 0.637 | 0.091713834 |
| Mtmr2 | 4.03797E-06 | -0.304216267 | 0.316 | 0.404 | 0.091714482 |
| Tmem117 | 4.09096E-06 | 0.369329109 | 0.433 | 0.34 | 0.092917885 |
| Macrod2 | 4.14258E-06 | -0.265086302 | 0.632 | 0.709 | 0.094090352 |
| Fmn1 | 4.16568E-06 | 0.432014024 | 0.158 | 0.092 | 0.094614998 |
| Atp5b | 4.7101E-06 | -0.304951842 | 0.203 | 0.286 | 0.106980609 |
| Pcdh15 | 4.76794E-06 | 0.359035914 | 0.418 | 0.324 | 0.108294192 |
| Bcl2l1 | 5.26163E-06 | -0.262598167 | 0.573 | 0.639 | 0.119507466 |
| Ywhaz | 6.50223E-06 | -0.274033445 | 0.405 | 0.495 | 0.147685083 |
| Rsrp1 | 6.62357E-06 | 0.268252514 | 0.568 | 0.489 | 0.150441105 |
| Wscd1 | 6.88474E-06 | 0.313435891 | 0.39 | 0.306 | 0.156373054 |
| Slc4a2 | 7.15541E-06 | 0.283002082 | 0.105 | 0.05 | 0.162520842 |
| C030029H02Rik | 7.89356E-06 | 0.315990497 | 0.676 | 0.623 | 0.179286512 |
| Wdr89 | 9.4705E-06 | -0.305091427 | 0.16 | 0.233 | 0.215103518 |
| Xkr4 | 9.7992E-06 | 0.261496149 | 0.679 | 0.601 | 0.222569282 |
| Dgkh | 9.99728E-06 | -0.303116024 | 0.115 | 0.183 | 0.227068132 |
| Cab39l | 1.03244E-05 | -0.318658712 | 0.205 | 0.282 | 0.234497291 |
| H2afz | 1.10308E-05 | -0.31218029 | 0.121 | 0.189 | 0.250542834 |
| Tmem132d | 1.13656E-05 | 0.381123775 | 0.134 | 0.074 | 0.258146558 |
| Gm4221 | 1.1478E-05 | 0.356915888 | 0.262 | 0.186 | 0.260699859 |
| 2900097C17Rik | 1.17549E-05 | -0.30227001 | 0.312 | 0.392 | 0.266989772 |
| Galnt6 | 1.18341E-05 | 0.299214868 | 0.32 | 0.234 | 0.268787937 |
| Foxp2 | 1.22628E-05 | -0.340713106 | 0.218 | 0.3 | 0.278524941 |
| Vps13a | 1.50366E-05 | -0.322834997 | 0.164 | 0.236 | 0.341526884 |
| Tmod1 | 1.57675E-05 | 0.342928791 | 0.441 | 0.368 | 0.358128089 |
| Rev1 | 1.6199E-05 | -0.316356635 | 0.164 | 0.234 | 0.367928106 |
| Gda | 1.67299E-05 | -0.254056677 | 0.098 | 0.16 | 0.379986271 |
| Elovl7 | 1.95982E-05 | 0.25702587 | 0.516 | 0.438 | 0.445133458 |
| Klf13 | 2.1186E-05 | -0.278656496 | 0.389 | 0.475 | 0.48119781 |
| Rgs2 | 2.12082E-05 | -0.25635951 | 0.055 | 0.103 | 0.481701462 |
| Slc6a9 | 2.46078E-05 | 0.280149667 | 0.154 | 0.092 | 0.558916122 |
| Gm12353 | 2.55672E-05 | -0.295234707 | 0.201 | 0.275 | 0.580708165 |
| Cfap77 | 2.58139E-05 | -0.255915187 | 0.134 | 0.2 | 0.586311663 |
| Lingo2 | 2.71227E-05 | 0.274733339 | 0.535 | 0.446 | 0.616037129 |
| Prkar2b | 2.80488E-05 | -0.268615877 | 0.087 | 0.144 | 0.637071362 |
| Usp50 | 3.05611E-05 | -0.258506227 | 0.072 | 0.123 | 0.694134962 |
| Gm44866 | 3.17819E-05 | -0.30464187 | 0.152 | 0.219 | 0.721862963 |
| Plekha5 | 3.22368E-05 | 0.257523944 | 0.551 | 0.457 | 0.732195032 |
| Kcnq5 | 3.26779E-05 | -0.369554611 | 0.58 | 0.637 | 0.74221397 |
| Mxi1 | 3.34717E-05 | -0.265283326 | 0.216 | 0.291 | 0.760243506 |
| Fbxl5 | 3.35881E-05 | -0.263148625 | 0.415 | 0.494 | 0.762887322 |
| Jakmip3 | 4.09779E-05 | 0.287559333 | 0.435 | 0.365 | 0.930731504 |
| Dennd6a | 4.45176E-05 | -0.253090686 | 0.276 | 0.356 | 1 |
| Sub1 | 4.98152E-05 | -0.345643157 | 0.168 | 0.232 | 1 |
| Rnf150 | 5.75161E-05 | -0.259618921 | 0.108 | 0.165 | 1 |
| Ptpn11 | 5.83638E-05 | -0.254666816 | 0.294 | 0.373 | 1 |
| Ntng1 | 5.84127E-05 | 0.302794926 | 0.114 | 0.063 | 1 |
| Tnni1 | 5.93394E-05 | 0.265584503 | 0.207 | 0.14 | 1 |
| Rps27rt | 6.49315E-05 | -0.260615607 | 0.159 | 0.227 | 1 |
| Hpca | 6.60929E-05 | -0.250244743 | 0.2 | 0.273 | 1 |
| Tob2 | 7.06483E-05 | -0.268178467 | 0.087 | 0.14 | 1 |
| Slc13a1 | 7.39373E-05 | -0.416354942 | 0.164 | 0.228 | 1 |
| Gm26848 | 7.87881E-05 | -0.26203397 | 0.288 | 0.358 | 1 |
| Ptms | 7.88863E-05 | -0.253551867 | 0.206 | 0.278 | 1 |
| Abca8a | 7.90933E-05 | 0.363386522 | 0.196 | 0.134 | 1 |
| Crtac1 | 8.3889E-05 | 0.274800212 | 0.137 | 0.082 | 1 |
| Cbl | 8.40144E-05 | -0.287372531 | 0.192 | 0.262 | 1 |
| Ppp1r14a | 8.91553E-05 | 0.262021364 | 0.257 | 0.183 | 1 |
| Kcnk13 | 9.07582E-05 | 0.278177538 | 0.465 | 0.39 | 1 |
| Nectin1 | 9.30865E-05 | 0.317272993 | 0.168 | 0.11 | 1 |
| P4ha1 | 9.6882E-05 | -0.294340364 | 0.148 | 0.209 | 1 |
| Efnb3 | 0.000101425 | 0.263985963 | 0.479 | 0.407 | 1 |
| Ppm1a | 0.000127974 | -0.253504104 | 0.233 | 0.304 | 1 |
| Nkd1 | 0.000132457 | 0.274303422 | 0.12 | 0.071 | 1 |
| mt-Nd1 | 0.00013356 | -0.353107143 | 0.25 | 0.319 | 1 |
| Ctso | 0.000137 | 0.251477219 | 0.134 | 0.081 | 1 |
| Gab2 | 0.000153313 | 0.329616911 | 0.268 | 0.2 | 1 |
| Fus | 0.000162577 | -0.25353832 | 0.406 | 0.481 | 1 |
| Mtus1 | 0.000176487 | 0.272659845 | 0.279 | 0.213 | 1 |
| Stxbp6 | 0.000182747 | -0.259035968 | 0.636 | 0.684 | 1 |
| Arf3 | 0.000184926 | -0.256495796 | 0.233 | 0.306 | 1 |
| Pde4d | 0.000189089 | 0.266640541 | 0.31 | 0.238 | 1 |
| Ctsl | 0.00019896 | -0.265312091 | 0.082 | 0.128 | 1 |
| Grik4 | 0.000223099 | 0.299586338 | 0.114 | 0.068 | 1 |
| Kctd13 | 0.000238318 | -0.255168093 | 0.374 | 0.446 | 1 |
| Gm20687 | 0.000245003 | 0.294562092 | 0.387 | 0.324 | 1 |
| Gm48370 | 0.000246592 | -0.264964035 | 0.14 | 0.198 | 1 |
| Mctp1 | 0.000255774 | -0.313925505 | 0.243 | 0.304 | 1 |
| Snca | 0.000257055 | -0.265817994 | 0.199 | 0.266 | 1 |
| Angptl2 | 0.000260599 | -0.251151976 | 0.132 | 0.186 | 1 |
| Slc15a2 | 0.000283592 | 0.264865198 | 0.108 | 0.063 | 1 |
| Sorcs3 | 0.000285367 | 0.300389154 | 0.22 | 0.16 | 1 |
| Spock1 | 0.000299049 | 0.25940375 | 0.443 | 0.373 | 1 |
| Heg1 | 0.000330089 | 0.299156406 | 0.351 | 0.283 | 1 |
| Tmem151a | 0.000335946 | 0.264895979 | 0.375 | 0.305 | 1 |
| Homer1 | 0.000336812 | -0.260676617 | 0.262 | 0.329 | 1 |
| Thsd4 | 0.000355239 | 0.274662201 | 0.167 | 0.113 | 1 |
| Gap43 | 0.000366641 | -0.275965091 | 0.187 | 0.249 | 1 |
| Appl2 | 0.000439246 | 0.266843544 | 0.23 | 0.17 | 1 |
| Runx1t1 | 0.000444442 | -0.259252577 | 0.148 | 0.203 | 1 |
| Marcks | 0.000489307 | -0.263006545 | 0.152 | 0.209 | 1 |
| Wwp2 | 0.000546435 | 0.292205808 | 0.183 | 0.131 | 1 |
| Sst | 0.000547709 | -0.264724143 | 0.196 | 0.256 | 1 |
| Agpat4 | 0.000566644 | 0.278183626 | 0.42 | 0.366 | 1 |
| Cyp27a1 | 0.000589499 | 0.264887022 | 0.172 | 0.121 | 1 |
| mt-Co1 | 0.000617742 | -0.293862674 | 0.578 | 0.627 | 1 |
| Tmem158 | 0.000635261 | -0.25550479 | 0.218 | 0.281 | 1 |
| Gm36855 | 0.000637362 | 0.289726729 | 0.147 | 0.098 | 1 |
| Celf4 | 0.000678896 | -0.302744586 | 0.196 | 0.251 | 1 |
| Nxph1 | 0.000803633 | 0.292082591 | 0.134 | 0.087 | 1 |
| Gbf1 | 0.000804734 | 0.258731079 | 0.383 | 0.319 | 1 |
| mt-Nd4 | 0.000890555 | -0.283857115 | 0.463 | 0.52 | 1 |
| Sv2c | 0.000905962 | -0.263757221 | 0.08 | 0.12 | 1 |
| Carns1 | 0.000990816 | 0.276365814 | 0.258 | 0.204 | 1 |
| Ndufs1 | 0.00116323 | -0.250745823 | 0.192 | 0.248 | 1 |
| Anln | 0.001224357 | -0.287742339 | 0.435 | 0.481 | 1 |
| Grin2b | 0.001249761 | -0.286592053 | 0.357 | 0.412 | 1 |
| Iffo1 | 0.001315947 | 0.2662186 | 0.211 | 0.159 | 1 |
| Bex2 | 0.001460951 | -0.277849262 | 0.228 | 0.282 | 1 |
| Extl3 | 0.00177253 | 0.265677343 | 0.168 | 0.122 | 1 |
| Rasal1 | 0.001861432 | 0.25015027 | 0.132 | 0.089 | 1 |
| Caln1 | 0.001932087 | -0.287884071 | 0.224 | 0.275 | 1 |
| Preb | 0.001997789 | 0.25041961 | 0.156 | 0.112 | 1 |
| Dscam | 0.00200123 | 0.303403959 | 0.158 | 0.116 | 1 |
| Pbx3 | 0.002245267 | -0.25101049 | 0.348 | 0.398 | 1 |
| Slc43a2 | 0.002480761 | 0.254223184 | 0.225 | 0.175 | 1 |
| Crebrf | 0.002612955 | -0.252158133 | 0.324 | 0.377 | 1 |
| Pgam1 | 0.003834463 | -0.254672185 | 0.146 | 0.188 | 1 |
| Gabrb3 | 0.004765491 | -0.268308612 | 0.346 | 0.385 | 1 |
| Pde1a | 0.005908684 | -0.261043249 | 0.101 | 0.137 | 1 |
| mt-Co2 | 0.007727279 | -0.276456548 | 0.501 | 0.54 | 1 |
| Sgk3 | 0.010588961 | -0.258823657 | 0.263 | 0.307 | 1 |
| Gria1 | 0.013456068 | -0.259883696 | 0.292 | 0.336 | 1 |
| Gabrg3 | 0.01954999 | -0.324564187 | 0.3 | 0.345 | 1 |
| Ptgds | 0.097558568 | -0.301247142 | 0.243 | 0.268 | 1 |

| **Supplemental Table S4. Differentially expressed genes in each cell type generated comparing the control and the mTBI SVZ, related to Figure 2. (Neuron DEGs)** | | | | | |
| --- | --- | --- | --- | --- | --- |
| Column1 | p_val | avg_log2FC | pct.1 | pct.2 | p_val_adj |
| Gm42418 | 0 | 0.5461072 | 0.999 | 0.998 | 0 |
| Ctnna3 | 1.2873E-218 | -0.596703449 | 0.939 | 0.967 | 2.9238E-214 |
| AC149090.1 | 4.6585E-172 | 0.725629012 | 0.64 | 0.401 | 1.0581E-167 |
| Snhg11 | 4.7222E-130 | 0.426894152 | 0.999 | 0.996 | 1.0726E-125 |
| Kcnq5 | 6.611E-123 | -0.408024558 | 0.958 | 0.984 | 1.5016E-118 |
| Plp1 | 2.1595E-103 | 0.401988199 | 0.874 | 0.751 | 4.90484E-99 |
| Nkain2 | 1.628E-94 | -0.290561982 | 0.993 | 0.999 | 3.69767E-90 |
| Samd5 | 3.69939E-81 | 0.431211135 | 0.681 | 0.502 | 8.40243E-77 |
| Edil3 | 2.02652E-72 | 0.490510686 | 0.582 | 0.409 | 4.60282E-68 |
| Gm15738 | 2.88773E-72 | -0.33073305 | 0.794 | 0.862 | 6.55889E-68 |
| Lrrtm3 | 1.46933E-71 | -0.311328792 | 0.948 | 0.961 | 3.33729E-67 |
| Snrnp70 | 2.44301E-71 | 0.283648925 | 0.894 | 0.805 | 5.5488E-67 |
| Pbx3 | 5.01696E-69 | -0.415881033 | 0.817 | 0.873 | 1.1395E-64 |
| Ppp1r2 | 7.7466E-69 | -0.360326199 | 0.682 | 0.792 | 1.75949E-64 |
| Tac1 | 3.09601E-68 | -0.346072631 | 0.352 | 0.512 | 7.03197E-64 |
| Trps1 | 2.00659E-67 | -0.36995169 | 0.784 | 0.861 | 4.55758E-63 |
| A330015K06Rik | 6.64025E-66 | -0.359790393 | 0.761 | 0.847 | 1.5082E-61 |
| Kcnc2 | 2.38582E-65 | 0.665921927 | 0.34 | 0.184 | 5.41891E-61 |
| Gm15810 | 5.5545E-65 | -0.360517072 | 0.519 | 0.66 | 1.26159E-60 |
| Gm26835 | 1.06185E-60 | -0.320635567 | 0.757 | 0.832 | 2.41178E-56 |
| Zbtb20 | 3.54105E-59 | -0.337651871 | 0.968 | 0.971 | 8.04279E-55 |
| Camta1 | 1.76319E-58 | 0.362289895 | 0.914 | 0.865 | 4.00474E-54 |
| Grm8 | 2.43451E-58 | 0.388589026 | 0.449 | 0.289 | 5.5295E-54 |
| R3hdm1 | 4.93224E-57 | -0.279437261 | 0.979 | 0.98 | 1.12026E-52 |
| Ksr2 | 1.85712E-56 | -0.271456836 | 0.918 | 0.956 | 4.21808E-52 |
| Miat | 2.30185E-54 | 0.298767605 | 0.267 | 0.14 | 5.22819E-50 |
| Rsrp1 | 2.67623E-54 | 0.257979233 | 0.762 | 0.638 | 6.07853E-50 |
| Cdh11 | 3.25653E-54 | -0.361165804 | 0.713 | 0.797 | 7.39656E-50 |
| Dgkb | 3.66332E-54 | -0.259105106 | 0.986 | 0.993 | 8.32051E-50 |
| Meis2 | 5.94539E-54 | -0.251571973 | 0.892 | 0.939 | 1.35038E-49 |
| Cmss1 | 6.27893E-54 | 0.261270671 | 0.919 | 0.856 | 1.42613E-49 |
| Pcsk2 | 1.00065E-52 | -0.288757657 | 0.885 | 0.943 | 2.27278E-48 |
| Arpp21 | 1.87559E-52 | -0.251803558 | 0.931 | 0.957 | 4.26004E-48 |
| Neto1 | 6.60054E-52 | -0.265031398 | 0.862 | 0.926 | 1.49918E-47 |
| Pcdh17 | 5.66573E-51 | -0.353363041 | 0.735 | 0.806 | 1.28686E-46 |
| Sash1 | 4.49711E-50 | 0.279151903 | 0.409 | 0.269 | 1.02143E-45 |
| Dscam | 3.29498E-49 | 0.648283667 | 0.476 | 0.344 | 7.48389E-45 |
| Nrbp2 | 1.48865E-47 | 0.255521893 | 0.2 | 0.095 | 3.38117E-43 |
| Pigk | 4.78E-47 | -0.316468154 | 0.733 | 0.789 | 1.08568E-42 |
| Nav1 | 1.65038E-46 | 0.294455403 | 0.641 | 0.509 | 3.74851E-42 |
| Drd3 | 3.20671E-46 | -0.311708102 | 0.119 | 0.23 | 7.28341E-42 |
| Galnt14 | 7.92108E-46 | 0.308053317 | 0.349 | 0.217 | 1.79911E-41 |
| Slc24a3 | 5.57348E-45 | 0.441026157 | 0.609 | 0.479 | 1.26591E-40 |
| Plcb4 | 3.01857E-44 | 0.388551499 | 0.278 | 0.161 | 6.85608E-40 |
| Cit | 6.02199E-44 | 0.304460464 | 0.833 | 0.751 | 1.36777E-39 |
| Khdrbs2 | 2.0236E-43 | -0.347748811 | 0.722 | 0.801 | 4.59619E-39 |
| Gm13269 | 8.30211E-43 | -0.316409582 | 0.511 | 0.615 | 1.88566E-38 |
| Frmd4a | 2.06807E-42 | 0.356271331 | 0.973 | 0.95 | 4.6972E-38 |
| Tmem108 | 2.33137E-42 | 0.40099062 | 0.239 | 0.13 | 5.29523E-38 |
| Osbpl8 | 3.00847E-42 | -0.254156577 | 0.917 | 0.944 | 6.83315E-38 |
| Sorbs2os | 3.67239E-42 | -0.262179734 | 0.664 | 0.749 | 8.3411E-38 |
| Camk2d | 6.52724E-42 | 0.5187958 | 0.405 | 0.287 | 1.48253E-37 |
| Grik1 | 1.33701E-40 | 0.49415961 | 0.218 | 0.114 | 3.03676E-36 |
| Tle4 | 3.40451E-40 | -0.282541337 | 0.726 | 0.795 | 7.73267E-36 |
| Cacna2d2 | 4.8312E-40 | 0.252234183 | 0.547 | 0.414 | 1.09731E-35 |
| Csgalnact1 | 5.94094E-40 | -0.338596407 | 0.253 | 0.373 | 1.34936E-35 |
| Phactr1 | 9.5609E-40 | -0.253550771 | 0.99 | 0.998 | 2.17157E-35 |
| RF01962 | 1.02407E-39 | 0.460396707 | 0.197 | 0.1 | 2.32596E-35 |
| Gm10848 | 3.20184E-39 | -0.268768444 | 0.424 | 0.538 | 7.27234E-35 |
| Zfp804b | 3.67929E-39 | 0.824734796 | 0.299 | 0.185 | 8.35677E-35 |
| Syndig1 | 8.45152E-39 | -0.300710228 | 0.719 | 0.783 | 1.91959E-34 |
| Grm3 | 7.4455E-38 | -0.271942534 | 0.835 | 0.888 | 1.6911E-33 |
| Gm47423 | 1.10803E-37 | -0.342482775 | 0.162 | 0.261 | 2.51668E-33 |
| Gm15261 | 1.13954E-37 | -0.299659692 | 0.279 | 0.396 | 2.58825E-33 |
| Peli1 | 1.69445E-37 | -0.322554256 | 0.542 | 0.629 | 3.8486E-33 |
| Hs6st3 | 2.79939E-37 | 0.36493732 | 0.894 | 0.872 | 6.35826E-33 |
| Homer1 | 3.15492E-37 | -0.289811162 | 0.827 | 0.875 | 7.16576E-33 |
| Gsdme | 4.64772E-37 | -0.27766451 | 0.577 | 0.654 | 1.05564E-32 |
| Pde4b | 1.95879E-36 | -0.423502078 | 0.913 | 0.932 | 4.449E-32 |
| Nxph1 | 3.67307E-36 | 0.30188863 | 0.276 | 0.167 | 8.34265E-32 |
| Fam155a | 9.53223E-36 | 0.447887548 | 0.732 | 0.64 | 2.16506E-31 |
| Slc2a13 | 2.66845E-35 | -0.264958502 | 0.941 | 0.95 | 6.06084E-31 |
| Gm43376 | 3.65717E-35 | -0.258648672 | 0.42 | 0.525 | 8.30652E-31 |
| Adcy8 | 7.41742E-34 | 0.286813783 | 0.189 | 0.1 | 1.68472E-29 |
| Chrm2 | 1.6834E-33 | 0.392514367 | 0.186 | 0.099 | 3.82351E-29 |
| Rgs20 | 1.99433E-33 | -0.297860647 | 0.755 | 0.81 | 4.52973E-29 |
| Pip5k1b | 2.34342E-33 | 0.25526851 | 0.257 | 0.157 | 5.32261E-29 |
| C530008M17Rik | 3.3359E-33 | 0.262014935 | 0.421 | 0.31 | 7.57682E-29 |
| Agbl4 | 3.86417E-33 | 0.337697068 | 0.814 | 0.729 | 8.77669E-29 |
| Cdk14 | 7.35275E-32 | 0.377679116 | 0.495 | 0.389 | 1.67003E-27 |
| Foxp2 | 3.27529E-31 | -0.354283108 | 0.73 | 0.82 | 7.43918E-27 |
| Pde1c | 6.33214E-31 | -0.264790241 | 0.648 | 0.733 | 1.43822E-26 |
| 9630028H03Rik | 7.99449E-31 | -0.278505635 | 0.639 | 0.715 | 1.81579E-26 |
| Ttc28 | 3.17855E-30 | 0.257689481 | 0.232 | 0.142 | 7.21944E-26 |
| Gnas | 3.83557E-30 | 0.311374913 | 0.59 | 0.489 | 8.71173E-26 |
| Rnf220 | 5.49405E-30 | 0.620016153 | 0.293 | 0.2 | 1.24786E-25 |
| Pou6f2 | 8.62168E-30 | 0.286890843 | 0.311 | 0.211 | 1.95824E-25 |
| Chrm3 | 1.38408E-29 | 0.434864899 | 0.42 | 0.311 | 3.14367E-25 |
| Gm32647 | 1.54699E-29 | -0.28331694 | 0.561 | 0.658 | 3.51368E-25 |
| Oprm1 | 1.69714E-29 | -0.273032667 | 0.35 | 0.458 | 3.85471E-25 |
| Mpp6 | 2.92248E-29 | -0.258380955 | 0.717 | 0.757 | 6.63782E-25 |
| Mast4 | 6.51783E-29 | 0.298780925 | 0.365 | 0.261 | 1.48039E-24 |
| Inpp4b | 2.33518E-28 | 0.471809756 | 0.495 | 0.396 | 5.30389E-24 |
| Sik2 | 2.10493E-27 | -0.306603578 | 0.69 | 0.73 | 4.78092E-23 |
| Rtl4 | 3.38424E-27 | 0.326872084 | 0.321 | 0.221 | 7.68662E-23 |
| Cdh13 | 1.60604E-26 | 0.312958578 | 0.707 | 0.639 | 3.6478E-22 |
| Vwc2 | 2.42139E-26 | 0.320290778 | 0.171 | 0.096 | 5.49969E-22 |
| Elavl4 | 6.97746E-26 | 0.260187352 | 0.267 | 0.177 | 1.58479E-21 |
| Man1a | 1.66977E-25 | -0.257345015 | 0.707 | 0.773 | 3.79255E-21 |
| Zmat4 | 3.23747E-25 | 0.364997059 | 0.53 | 0.435 | 7.35326E-21 |
| Nexn | 1.1365E-24 | 0.250740093 | 0.53 | 0.445 | 2.58134E-20 |
| Galnt17 | 1.26501E-24 | 0.274690823 | 0.695 | 0.611 | 2.87321E-20 |
| Wwox | 2.47687E-24 | 0.262797416 | 0.741 | 0.666 | 5.6257E-20 |
| Btbd11 | 2.98378E-23 | 0.280433928 | 0.211 | 0.137 | 6.77706E-19 |
| Hdac9 | 3.22116E-23 | 0.466637942 | 0.716 | 0.63 | 7.31623E-19 |
| Adam12 | 6.22383E-23 | -0.273264795 | 0.341 | 0.423 | 1.41362E-18 |
| Gm45881 | 6.28708E-23 | -0.28908157 | 0.551 | 0.621 | 1.42799E-18 |
| Ncald | 7.43576E-23 | 0.294539182 | 0.351 | 0.263 | 1.68889E-18 |
| Tshz2 | 2.41997E-22 | 0.479379583 | 0.243 | 0.17 | 5.49648E-18 |
| Sez6l | 2.69748E-22 | 0.258889704 | 0.28 | 0.199 | 6.12678E-18 |
| Nell1 | 3.41984E-22 | 0.420325391 | 0.47 | 0.385 | 7.76748E-18 |
| Ptpn3 | 4.08554E-22 | 0.268437227 | 0.106 | 0.053 | 9.27949E-18 |
| Ntm | 3.13819E-21 | 0.273476453 | 0.936 | 0.901 | 7.12778E-17 |
| Gulp1 | 3.43793E-20 | -0.252595109 | 0.49 | 0.572 | 7.80856E-16 |
| Cdh10 | 1.44698E-19 | -0.259695761 | 0.698 | 0.737 | 3.28652E-15 |
| Kcnmb2 | 1.77734E-19 | 0.417041405 | 0.116 | 0.063 | 4.03687E-15 |
| Ptprk | 2.44914E-19 | 0.279125247 | 0.172 | 0.109 | 5.56273E-15 |
| Ano2 | 7.23058E-18 | 0.251694154 | 0.51 | 0.453 | 1.64228E-13 |
| Galntl6 | 1.94638E-16 | 0.271295744 | 0.948 | 0.937 | 4.42081E-12 |
| Fstl5 | 2.55944E-16 | 0.284499763 | 0.549 | 0.473 | 5.81326E-12 |
| Cep112 | 3.80331E-16 | 0.322051759 | 0.484 | 0.411 | 8.63845E-12 |
| Brinp3 | 5.71916E-16 | 0.297869638 | 0.723 | 0.663 | 1.29899E-11 |
| A330008L17Rik | 7.05305E-16 | 0.255234016 | 0.557 | 0.481 | 1.60196E-11 |
| Luzp2 | 1.94636E-15 | 0.306451187 | 0.371 | 0.297 | 4.42076E-11 |
| Pde1a | 4.55937E-15 | -0.258281774 | 0.455 | 0.534 | 1.03557E-10 |
| Car10 | 6.26446E-15 | 0.430408891 | 0.28 | 0.211 | 1.42285E-10 |
| Tmcc3 | 1.71361E-11 | 0.255041516 | 0.394 | 0.334 | 3.89212E-07 |
| Zfhx3 | 8.27585E-11 | 0.341269748 | 0.654 | 0.605 | 1.87969E-06 |
| Gpc5 | 2.98101E-10 | 0.561065376 | 0.303 | 0.252 | 6.77078E-06 |
| Cadps2 | 1.49996E-09 | 0.362747864 | 0.191 | 0.146 | 3.40687E-05 |
| Sox5 | 1.35312E-08 | 0.287268644 | 0.158 | 0.118 | 0.000307334 |
| Fign | 2.64556E-08 | 0.358393448 | 0.183 | 0.144 | 0.000600886 |
| Unc5d | 2.16402E-05 | 0.27860765 | 0.57 | 0.541 | 0.491513043 |
| Astn2 | 7.59376E-05 | 0.296019755 | 0.517 | 0.489 | 1 |
| Ntng1 | 0.000173119 | 0.368365936 | 0.467 | 0.416 | 1 |
| Il1rapl2 | 0.000225222 | 0.278287507 | 0.32 | 0.284 | 1 |
| Gm38505 | 0.000425743 | -0.26905759 | 0.24 | 0.265 | 1 |
| Pde4d | 0.058522886 | 0.25037705 | 0.737 | 0.748 | 1 |
| Rgs6 | 0.935515074 | 0.324329683 | 0.411 | 0.412 | 1 |

| **Supplemental Table S4. Differentially expressed genes in each cell type generated comparing the control and the mTBI SVZ, related to Figure 2. (Microglia DEGs)** | | | | | |
| --- | --- | --- | --- | --- | --- |
| Column1 | p_val | avg_log2FC | pct.1 | pct.2 | p_val_adj |
| Gm42418 | 1.1926E-23 | 0.568625303 | 1 | 1 | 2.70876E-19 |
| Plp1 | 1.37935E-09 | 0.614140931 | 0.881 | 0.756 | 3.13293E-05 |
| Calm2 | 4.23213E-08 | -0.62102242 | 0.648 | 0.803 | 0.000961243 |
| Fkbp5 | 4.42701E-08 | -1.001704105 | 0.263 | 0.445 | 0.001005507 |
| Ccnd3 | 1.72515E-07 | -0.769342804 | 0.534 | 0.672 | 0.003918328 |
| Arpp21 | 1.46025E-06 | -0.645750446 | 0.413 | 0.559 | 0.033166653 |
| Rsrp1 | 3.02829E-06 | 0.538036065 | 0.684 | 0.525 | 0.068781641 |
| Cmss1 | 3.19808E-05 | 0.413499149 | 0.894 | 0.849 | 0.726378885 |
| Tac1 | 3.845E-05 | -0.653766123 | 0.238 | 0.382 | 0.873315399 |
| Ppp3ca | 6.93113E-05 | -0.297323418 | 0.942 | 0.971 | 1 |
| Camk1d | 0.00010721 | 0.347372355 | 0.876 | 0.794 | 1 |
| Zfp445 | 0.000107794 | 0.463659121 | 0.258 | 0.126 | 1 |
| Abhd15 | 0.000120444 | -0.549119177 | 0.149 | 0.265 | 1 |
| Ppp1r2 | 0.000123074 | -0.521226574 | 0.289 | 0.437 | 1 |
| Gpr88 | 0.000131548 | -0.537746519 | 0.433 | 0.559 | 1 |
| Pvt1 | 0.000223298 | 0.579153945 | 0.392 | 0.256 | 1 |
| Plekho1 | 0.000227877 | 0.494338209 | 0.385 | 0.248 | 1 |
| Gm7480 | 0.000228907 | -0.431150663 | 0.041 | 0.118 | 1 |
| Vsnl1 | 0.00023388 | 0.494636446 | 0.167 | 0.067 | 1 |
| Glp2r | 0.000260285 | -0.535546628 | 0.122 | 0.227 | 1 |
| Per2 | 0.000321708 | -0.348303683 | 0.035 | 0.105 | 1 |
| Gpm6a | 0.000349452 | -0.350966834 | 0.582 | 0.685 | 1 |
| Myo1e | 0.000368792 | 0.519146766 | 0.228 | 0.113 | 1 |
| Slc1a1 | 0.000512585 | 0.417508017 | 0.132 | 0.046 | 1 |
| Arpp19 | 0.000580085 | -0.461107399 | 0.286 | 0.408 | 1 |
| Pon3 | 0.000671981 | 0.450779964 | 0.154 | 0.063 | 1 |
| Cdk6 | 0.000717087 | 0.55438405 | 0.397 | 0.286 | 1 |
| Gm26835 | 0.00074239 | -0.397719626 | 0.068 | 0.147 | 1 |
| Pi4k2a | 0.00078389 | 0.314869878 | 0.19 | 0.088 | 1 |
| Dusp16 | 0.000794898 | 0.453116201 | 0.21 | 0.105 | 1 |
| Gm16337 | 0.000800691 | -0.431049799 | 0.17 | 0.277 | 1 |
| Map9 | 0.000832156 | -0.525339575 | 0.046 | 0.113 | 1 |
| Pdyn | 0.000868043 | -0.323468527 | 0.048 | 0.122 | 1 |
| Cep83 | 0.000879024 | 0.497597788 | 0.172 | 0.08 | 1 |
| H3f3a | 0.000882398 | -0.355112888 | 0.251 | 0.382 | 1 |
| Slc25a3 | 0.000929492 | -0.427940996 | 0.251 | 0.374 | 1 |
| Pdss2 | 0.000935845 | 0.327798932 | 0.291 | 0.168 | 1 |
| Ptpn1 | 0.000944261 | 0.445561309 | 0.367 | 0.244 | 1 |
| Pde10a | 0.000989728 | -0.384077427 | 0.516 | 0.622 | 1 |
| Cpe | 0.00109932 | -0.435897432 | 0.382 | 0.492 | 1 |
| Mbp | 0.001101483 | 0.473802684 | 0.342 | 0.21 | 1 |
| Vps8 | 0.001111443 | 0.426930377 | 0.268 | 0.155 | 1 |
| Npy | 0.001372473 | -0.419485682 | 0.058 | 0.13 | 1 |
| Nfx1 | 0.001372673 | 0.338094374 | 0.271 | 0.16 | 1 |
| Penk | 0.001383688 | -0.485511678 | 0.392 | 0.5 | 1 |
| Map2 | 0.001397617 | -0.461168791 | 0.281 | 0.391 | 1 |
| Aatk | 0.001412336 | 0.551239966 | 0.182 | 0.092 | 1 |
| Six3 | 0.001420397 | -0.363026951 | 0.043 | 0.109 | 1 |
| Sv2b | 0.001490091 | -0.386378094 | 0.099 | 0.185 | 1 |
| Ppp1r12a | 0.001666472 | 0.298986652 | 0.6 | 0.475 | 1 |
| Mob1b | 0.001700587 | -0.473859103 | 0.111 | 0.197 | 1 |
| Zfp318 | 0.001724257 | -0.515734755 | 0.073 | 0.147 | 1 |
| Hint1 | 0.001733781 | -0.391715876 | 0.114 | 0.21 | 1 |
| Slc22a17 | 0.001763725 | -0.413675915 | 0.354 | 0.475 | 1 |
| Ccnc | 0.001804272 | 0.370795364 | 0.127 | 0.05 | 1 |
| Ddx60 | 0.001864924 | 0.391237538 | 0.109 | 0.038 | 1 |
| Fam105a | 0.001900811 | -0.357545049 | 0.572 | 0.693 | 1 |
| Snrnp70 | 0.001930314 | 0.391395039 | 0.557 | 0.454 | 1 |
| Elmod1 | 0.001930639 | -0.350229429 | 0.349 | 0.462 | 1 |
| Gria2 | 0.001931503 | -0.309243151 | 0.724 | 0.748 | 1 |
| Cd37 | 0.001950002 | 0.457964803 | 0.354 | 0.244 | 1 |
| Nsg2 | 0.001960227 | -0.394696704 | 0.438 | 0.542 | 1 |
| Samd5 | 0.001963759 | 0.281077075 | 0.114 | 0.042 | 1 |
| Rreb1 | 0.002029349 | -0.25972223 | 0.79 | 0.849 | 1 |
| Ctnnbip1 | 0.002074697 | 0.361696621 | 0.106 | 0.038 | 1 |
| Noc2l | 0.002076082 | 0.332734208 | 0.114 | 0.042 | 1 |
| Pcp4l1 | 0.002117449 | -0.452268451 | 0.122 | 0.21 | 1 |
| Gm32036 | 0.002119366 | -0.340578352 | 0.281 | 0.395 | 1 |
| Tbxas1 | 0.002142163 | 0.303375517 | 0.577 | 0.454 | 1 |
| Baiap2 | 0.002151243 | -0.446252266 | 0.225 | 0.332 | 1 |
| Evl | 0.002168434 | 0.349826773 | 0.494 | 0.387 | 1 |
| AC149090.1 | 0.002182239 | 0.311275077 | 0.453 | 0.315 | 1 |
| Naa20 | 0.002227739 | 0.484154292 | 0.2 | 0.109 | 1 |
| Arsb | 0.002346485 | 0.344717459 | 0.549 | 0.433 | 1 |
| Jph4 | 0.002349949 | -0.315121168 | 0.144 | 0.244 | 1 |
| Arhgap25 | 0.002370569 | 0.414291393 | 0.327 | 0.21 | 1 |
| Esyt2 | 0.002417285 | -0.419206488 | 0.18 | 0.277 | 1 |
| C1qc | 0.002421931 | -0.401263798 | 0.205 | 0.311 | 1 |
| Chn1 | 0.002443308 | -0.451502115 | 0.322 | 0.424 | 1 |
| Sez6l2 | 0.002454928 | 0.433581283 | 0.109 | 0.042 | 1 |
| Bcor | 0.002460385 | 0.450898425 | 0.284 | 0.181 | 1 |
| Rplp1 | 0.002507065 | -0.417429382 | 0.142 | 0.235 | 1 |
| Foxp1 | 0.002515254 | -0.274062816 | 0.597 | 0.693 | 1 |
| 5330417C22Rik | 0.002529667 | -0.484230816 | 0.086 | 0.16 | 1 |
| Plk2 | 0.002583564 | -0.28317407 | 0.122 | 0.214 | 1 |
| Atp5b | 0.002811248 | -0.390298849 | 0.223 | 0.332 | 1 |
| Anxa3 | 0.002829867 | 0.361238309 | 0.489 | 0.366 | 1 |
| Gria4 | 0.002839959 | 0.383357339 | 0.337 | 0.218 | 1 |
| Prkacb | 0.002856195 | -0.377669396 | 0.263 | 0.374 | 1 |
| Gnas | 0.002975324 | 0.375651981 | 0.613 | 0.487 | 1 |
| Man2a1 | 0.002988902 | -0.480421174 | 0.142 | 0.231 | 1 |
| Chchd10 | 0.003107074 | -0.478274036 | 0.096 | 0.172 | 1 |
| Diras2 | 0.003122026 | -0.356369064 | 0.051 | 0.113 | 1 |
| Yes1 | 0.003220599 | -0.340961786 | 0.165 | 0.261 | 1 |
| Tmem151a | 0.003232854 | 0.372962611 | 0.139 | 0.063 | 1 |
| Ern1 | 0.003342653 | 0.429548046 | 0.177 | 0.092 | 1 |
| AY036118 | 0.003419247 | -0.380067857 | 0.316 | 0.424 | 1 |
| Iffo1 | 0.003443602 | 0.337558038 | 0.322 | 0.21 | 1 |
| Nsg1 | 0.003571139 | -0.383151613 | 0.215 | 0.319 | 1 |
| Rab11fip5 | 0.003677977 | 0.281925525 | 0.104 | 0.038 | 1 |
| Golgb1 | 0.00382644 | 0.418130073 | 0.253 | 0.16 | 1 |
| Abi3 | 0.004172512 | 0.305926855 | 0.4 | 0.277 | 1 |
| Apoe | 0.00420495 | -0.291286638 | 0.484 | 0.592 | 1 |
| Hspa8 | 0.004226985 | -0.387470951 | 0.334 | 0.437 | 1 |
| Zfp740 | 0.004236017 | 0.350436908 | 0.213 | 0.122 | 1 |
| Hnrnpk | 0.00434412 | -0.407485715 | 0.223 | 0.315 | 1 |
| Rab3gap1 | 0.004375082 | -0.40535628 | 0.278 | 0.382 | 1 |
| Npas3 | 0.004416881 | 0.441331366 | 0.154 | 0.076 | 1 |
| Ddn | 0.00461461 | -0.41878212 | 0.078 | 0.147 | 1 |
| Shtn1 | 0.004950482 | 0.37868159 | 0.154 | 0.08 | 1 |
| Ak2 | 0.005046521 | 0.263253932 | 0.111 | 0.046 | 1 |
| Camk2b | 0.005057306 | -0.308166215 | 0.299 | 0.408 | 1 |
| Zfp804b | 0.005075345 | 0.427368582 | 0.111 | 0.046 | 1 |
| Pbrm1 | 0.005156217 | -0.399186456 | 0.324 | 0.416 | 1 |
| Spopl | 0.005227127 | 0.281184278 | 0.261 | 0.16 | 1 |
| Spata2 | 0.005358432 | -0.404783065 | 0.046 | 0.101 | 1 |
| Usp50 | 0.005368074 | -0.441204343 | 0.21 | 0.303 | 1 |
| Lysmd4 | 0.005428644 | -0.306420729 | 0.58 | 0.664 | 1 |
| Tubb5 | 0.005679009 | -0.486296687 | 0.144 | 0.227 | 1 |
| Strip2 | 0.005930663 | -0.351320959 | 0.122 | 0.202 | 1 |
| Slc1a3 | 0.006354397 | -0.468642617 | 0.304 | 0.391 | 1 |
| Ntng1 | 0.006359874 | 0.425573676 | 0.114 | 0.05 | 1 |
| Unc93b1 | 0.006432228 | 0.293626334 | 0.572 | 0.45 | 1 |
| Mical3 | 0.006432827 | 0.447914724 | 0.248 | 0.164 | 1 |
| Lgmn | 0.006517613 | 0.332621036 | 0.749 | 0.66 | 1 |
| 0610030E20Rik | 0.006622987 | 0.25725011 | 0.134 | 0.063 | 1 |
| Git2 | 0.006629795 | 0.330839487 | 0.552 | 0.429 | 1 |
| Usp24 | 0.006711656 | -0.410771736 | 0.418 | 0.5 | 1 |
| Pard3b | 0.006718108 | 0.393590461 | 0.448 | 0.353 | 1 |
| Sars | 0.006840071 | 0.281359139 | 0.122 | 0.055 | 1 |
| Tspyl1 | 0.007001619 | -0.314221627 | 0.061 | 0.122 | 1 |
| Timm13 | 0.007092613 | -0.294687114 | 0.048 | 0.105 | 1 |
| Rgs17 | 0.007278969 | -0.492003613 | 0.127 | 0.197 | 1 |
| Sos2 | 0.007356542 | 0.343192509 | 0.215 | 0.13 | 1 |
| Filip1l | 0.007408475 | -0.308101313 | 0.111 | 0.189 | 1 |
| Lamtor1 | 0.00743656 | -0.294003463 | 0.071 | 0.134 | 1 |
| Gm2245 | 0.007443512 | -0.38466017 | 0.203 | 0.294 | 1 |
| Acox3 | 0.007451401 | 0.286137715 | 0.144 | 0.071 | 1 |
| Plppr4 | 0.007512598 | -0.376279572 | 0.365 | 0.458 | 1 |
| Tpd52 | 0.007619135 | 0.301092635 | 0.273 | 0.176 | 1 |
| Ywhaz | 0.007689186 | -0.289310798 | 0.441 | 0.546 | 1 |
| Gm3002 | 0.007783203 | 0.321525311 | 0.132 | 0.063 | 1 |
| Timm23 | 0.008078827 | 0.299683606 | 0.124 | 0.059 | 1 |
| Gm37768 | 0.008196037 | -0.399737435 | 0.051 | 0.105 | 1 |
| Ttc13 | 0.008245171 | 0.354914758 | 0.144 | 0.076 | 1 |
| Ndufs3 | 0.008382412 | -0.408705873 | 0.094 | 0.16 | 1 |
| Gtf2f2 | 0.008500136 | -0.295768307 | 0.096 | 0.168 | 1 |
| Mal | 0.00850212 | 0.313741907 | 0.243 | 0.155 | 1 |
| Ncald | 0.00877859 | 0.271152414 | 0.101 | 0.042 | 1 |
| Dctn3 | 0.009075325 | -0.279371876 | 0.058 | 0.118 | 1 |
| Hs6st3 | 0.009169918 | 0.456734716 | 0.342 | 0.244 | 1 |
| Apbb2 | 0.00942352 | 0.356910434 | 0.494 | 0.399 | 1 |
| Ifnar2 | 0.009453329 | 0.429369541 | 0.18 | 0.105 | 1 |
| Syt4 | 0.009522845 | -0.403818346 | 0.22 | 0.303 | 1 |
| Clpx | 0.009614872 | -0.370105217 | 0.119 | 0.193 | 1 |
| Tnfaip8 | 0.009653701 | -0.301111533 | 0.162 | 0.248 | 1 |
| Nav1 | 0.009677326 | 0.449398522 | 0.225 | 0.147 | 1 |
| Ddb2 | 0.009840654 | -0.323664498 | 0.061 | 0.118 | 1 |
| Dock9 | 0.009904675 | 0.369610475 | 0.241 | 0.155 | 1 |
| Gucy1a1 | 0.009965391 | -0.256805044 | 0.078 | 0.143 | 1 |
| Rcn2 | 0.010068231 | -0.385345277 | 0.144 | 0.223 | 1 |
| Immp2l | 0.01027105 | 0.411585039 | 0.478 | 0.387 | 1 |
| Gm45844 | 0.010368441 | 0.384071098 | 0.132 | 0.067 | 1 |
| 4930599N23Rik | 0.01038682 | -0.434773672 | 0.109 | 0.176 | 1 |
| Bin3 | 0.010434836 | -0.335262005 | 0.058 | 0.113 | 1 |
| Abca3 | 0.010438281 | 0.344172718 | 0.175 | 0.101 | 1 |
| Plgrkt | 0.010455712 | 0.322820066 | 0.281 | 0.189 | 1 |
| Pkd1 | 0.010945754 | 0.268845636 | 0.223 | 0.139 | 1 |
| Gusb | 0.010970443 | 0.335610449 | 0.17 | 0.097 | 1 |
| Ksr2 | 0.011200324 | -0.298562967 | 0.306 | 0.408 | 1 |
| Peak1 | 0.011223803 | 0.331280201 | 0.428 | 0.336 | 1 |
| Ids | 0.011353887 | -0.353114037 | 0.111 | 0.181 | 1 |
| Dnajc27 | 0.01156004 | 0.26272159 | 0.109 | 0.05 | 1 |
| Arf3 | 0.011561887 | -0.493370446 | 0.296 | 0.366 | 1 |
| Anapc15 | 0.01165686 | 0.388405122 | 0.142 | 0.076 | 1 |
| Gm13710 | 0.011699728 | -0.325661089 | 0.101 | 0.172 | 1 |
| Susd3 | 0.011733251 | 0.31988768 | 0.284 | 0.189 | 1 |
| Wdr44 | 0.011919907 | 0.306204729 | 0.367 | 0.282 | 1 |
| Med15 | 0.012086348 | 0.376753732 | 0.19 | 0.118 | 1 |
| Nploc4 | 0.01231457 | -0.347707504 | 0.116 | 0.185 | 1 |
| Zfp260 | 0.0124453 | -0.324141034 | 0.104 | 0.172 | 1 |
| Glis3 | 0.012514923 | -0.416746331 | 0.139 | 0.214 | 1 |
| Picalm | 0.012520458 | -0.286675757 | 0.711 | 0.769 | 1 |
| Selenok | 0.012532905 | -0.343331878 | 0.157 | 0.235 | 1 |
| Gm17231 | 0.012543703 | -0.372797444 | 0.177 | 0.256 | 1 |
| Traf3 | 0.012782949 | 0.36872984 | 0.291 | 0.202 | 1 |
| Cd9 | 0.013066462 | 0.260574713 | 0.294 | 0.202 | 1 |
| Faim2 | 0.013080397 | 0.255547129 | 0.157 | 0.084 | 1 |
| Actr1b | 0.013162019 | 0.29338954 | 0.17 | 0.097 | 1 |
| Elk3 | 0.013475398 | 0.318480263 | 0.327 | 0.227 | 1 |
| Ppm1k | 0.013488776 | -0.32588627 | 0.078 | 0.139 | 1 |
| Map1a | 0.013667936 | 0.445986868 | 0.137 | 0.076 | 1 |
| Snap25 | 0.013683281 | -0.265449958 | 0.572 | 0.651 | 1 |
| Gm16599 | 0.013713652 | -0.372101968 | 0.213 | 0.294 | 1 |
| Spock1 | 0.013812806 | 0.341564473 | 0.195 | 0.122 | 1 |
| Dynll1 | 0.013881191 | -0.257117053 | 0.197 | 0.286 | 1 |
| Gpatch2 | 0.013926753 | 0.408163909 | 0.256 | 0.176 | 1 |
| Gm26857 | 0.014001527 | -0.403012468 | 0.073 | 0.13 | 1 |
| Bex2 | 0.014050303 | -0.329706986 | 0.21 | 0.294 | 1 |
| Eipr1 | 0.014220219 | 0.293541609 | 0.111 | 0.055 | 1 |
| Fam155a | 0.014377926 | 0.513872399 | 0.266 | 0.185 | 1 |
| Narf | 0.01448084 | 0.456210592 | 0.134 | 0.076 | 1 |
| Pld4 | 0.014490759 | 0.405008072 | 0.157 | 0.092 | 1 |
| Grn | 0.014559548 | -0.286298607 | 0.111 | 0.181 | 1 |
| Lars2 | 0.014775809 | 0.284519615 | 0.397 | 0.294 | 1 |
| Pink1 | 0.014979183 | -0.356190725 | 0.063 | 0.118 | 1 |
| Rasgrp1 | 0.015072153 | -0.338886349 | 0.177 | 0.261 | 1 |
| Pcdh17 | 0.015287199 | -0.28251403 | 0.21 | 0.294 | 1 |
| Ptprn | 0.015351782 | -0.408593863 | 0.225 | 0.298 | 1 |
| Ndufa4 | 0.01536731 | -0.378608964 | 0.122 | 0.189 | 1 |
| Krcc1 | 0.015533602 | 0.350191033 | 0.233 | 0.155 | 1 |
| Irf2bp2 | 0.015536878 | -0.322469237 | 0.142 | 0.214 | 1 |
| Tbc1d13 | 0.015580893 | 0.263246853 | 0.101 | 0.046 | 1 |
| Frmd5 | 0.015666235 | 0.536672097 | 0.238 | 0.164 | 1 |
| Cln3 | 0.015674653 | 0.323912033 | 0.134 | 0.071 | 1 |
| Top1 | 0.015894896 | -0.337658603 | 0.342 | 0.429 | 1 |
| Rab11fip2 | 0.015940566 | 0.285345486 | 0.238 | 0.155 | 1 |
| Aatf | 0.015966387 | 0.336269794 | 0.268 | 0.185 | 1 |
| Wdfy1 | 0.016315827 | 0.359056703 | 0.192 | 0.122 | 1 |
| Osbpl8 | 0.01632559 | -0.282005298 | 0.458 | 0.542 | 1 |
| Secisbp2 | 0.016400247 | 0.313122307 | 0.159 | 0.092 | 1 |
| Sub1 | 0.016959703 | -0.310585792 | 0.142 | 0.21 | 1 |
| Zfp943 | 0.016985927 | -0.413441564 | 0.104 | 0.164 | 1 |
| Slc2a13 | 0.017135114 | -0.276980572 | 0.175 | 0.256 | 1 |
| Abcc5 | 0.017144969 | 0.29422367 | 0.456 | 0.361 | 1 |
| Zfp266 | 0.017637178 | 0.310916364 | 0.233 | 0.155 | 1 |
| Gm20275 | 0.017737312 | -0.342457133 | 0.172 | 0.248 | 1 |
| Mafg | 0.017784342 | 0.412849188 | 0.256 | 0.185 | 1 |
| Dcaf5 | 0.017797212 | 0.307748132 | 0.296 | 0.21 | 1 |
| Rab12 | 0.01822806 | 0.388340786 | 0.205 | 0.134 | 1 |
| Mcf2l | 0.018372737 | -0.280152459 | 0.068 | 0.122 | 1 |
| Arpc4 | 0.018398304 | 0.278015118 | 0.149 | 0.084 | 1 |
| Dhx57 | 0.018410096 | 0.265093894 | 0.261 | 0.181 | 1 |
| Sbds | 0.01841162 | 0.268374775 | 0.122 | 0.063 | 1 |
| Gm26518 | 0.018412227 | -0.401141223 | 0.127 | 0.193 | 1 |
| Klhdc10 | 0.01842439 | 0.350280858 | 0.296 | 0.214 | 1 |
| Pdlim5 | 0.018540948 | 0.304450886 | 0.228 | 0.151 | 1 |
| Hook3 | 0.018716991 | -0.348225284 | 0.354 | 0.424 | 1 |
| Cdk9 | 0.018883329 | 0.301497561 | 0.147 | 0.084 | 1 |
| Sat1 | 0.019068639 | 0.30568618 | 0.253 | 0.172 | 1 |
| Stk4 | 0.019182262 | -0.339141664 | 0.208 | 0.286 | 1 |
| Dclk1 | 0.01918618 | -0.340392642 | 0.359 | 0.433 | 1 |
| Phlpp2 | 0.019235057 | -0.374948411 | 0.162 | 0.235 | 1 |
| Mag | 0.01940428 | 0.277559461 | 0.139 | 0.076 | 1 |
| Ptpro | 0.019643169 | 0.341617815 | 0.309 | 0.231 | 1 |
| Thsd7a | 0.020297084 | 0.432732946 | 0.301 | 0.223 | 1 |
| Idh2 | 0.02048589 | 0.261256474 | 0.137 | 0.076 | 1 |
| B4galt4 | 0.020537176 | 0.335724357 | 0.124 | 0.067 | 1 |
| Fcgr1 | 0.020601759 | 0.255243607 | 0.109 | 0.055 | 1 |
| Ptges3 | 0.020671677 | -0.278411983 | 0.137 | 0.21 | 1 |
| Fcer1g | 0.020713779 | 0.256019548 | 0.154 | 0.088 | 1 |
| Rhbdd1 | 0.020775657 | 0.268853494 | 0.137 | 0.076 | 1 |
| Stx16 | 0.02080482 | 0.397032462 | 0.332 | 0.256 | 1 |
| Cadps | 0.020869443 | 0.423966586 | 0.238 | 0.168 | 1 |
| Ndrg2 | 0.020872345 | 0.339658576 | 0.119 | 0.063 | 1 |
| Gon4l | 0.021102546 | 0.37263451 | 0.291 | 0.218 | 1 |
| Chmp5 | 0.021127476 | -0.325042256 | 0.066 | 0.118 | 1 |
| Gsk3b | 0.021176806 | -0.253527131 | 0.458 | 0.55 | 1 |
| Peli2 | 0.021265644 | -0.341482945 | 0.276 | 0.349 | 1 |
| Gorasp2 | 0.021398071 | -0.304826955 | 0.096 | 0.155 | 1 |
| P3h2 | 0.021675717 | -0.312895749 | 0.534 | 0.584 | 1 |
| Mlph | 0.022051783 | -0.303211304 | 0.086 | 0.143 | 1 |
| Tsc22d3 | 0.022123088 | -0.294356576 | 0.076 | 0.13 | 1 |
| Gm43821 | 0.02224115 | 0.28671613 | 0.134 | 0.076 | 1 |
| Zfp516 | 0.022243236 | -0.317029951 | 0.089 | 0.147 | 1 |
| Fxr1 | 0.022527026 | 0.278023525 | 0.271 | 0.189 | 1 |
| Rab40c | 0.022619095 | 0.340089056 | 0.278 | 0.202 | 1 |
| Cfap46 | 0.02263732 | -0.381969482 | 0.084 | 0.139 | 1 |
| Ppp1r7 | 0.022914698 | -0.294531581 | 0.114 | 0.176 | 1 |
| Clock | 0.022967051 | -0.322204455 | 0.23 | 0.307 | 1 |
| Cdk8 | 0.023035111 | 0.316626539 | 0.332 | 0.248 | 1 |
| Otud4 | 0.023072415 | 0.284248274 | 0.21 | 0.139 | 1 |
| Sgcd | 0.023180226 | -0.394781886 | 0.162 | 0.231 | 1 |
| 5031439G07Rik | 0.023183792 | 0.306960403 | 0.23 | 0.155 | 1 |
| Tet3 | 0.023460139 | 0.331590469 | 0.433 | 0.336 | 1 |
| Clint1 | 0.023498856 | 0.371001967 | 0.466 | 0.382 | 1 |
| Khdrbs2 | 0.02356092 | -0.462707576 | 0.132 | 0.193 | 1 |
| Lrmp | 0.023753451 | 0.367149045 | 0.149 | 0.088 | 1 |
| Arl14ep | 0.023817466 | 0.262193734 | 0.101 | 0.05 | 1 |
| Tnks | 0.023825345 | 0.327879243 | 0.316 | 0.239 | 1 |
| Tmem65 | 0.023876472 | -0.312118849 | 0.114 | 0.176 | 1 |
| Uqcc1 | 0.023954538 | 0.290845429 | 0.154 | 0.092 | 1 |
| Prpf40a | 0.024131829 | 0.25274919 | 0.327 | 0.244 | 1 |
| Opcml | 0.024195312 | 0.282901609 | 0.413 | 0.319 | 1 |
| 8030442B05Rik | 0.024547008 | 0.276189844 | 0.534 | 0.466 | 1 |
| Sgk1 | 0.024854081 | 0.361851482 | 0.22 | 0.151 | 1 |
| AU020206 | 0.024856295 | 0.337209058 | 0.268 | 0.193 | 1 |
| Rab28 | 0.025357997 | 0.382415617 | 0.225 | 0.155 | 1 |
| Pepd | 0.025608725 | 0.319031602 | 0.137 | 0.08 | 1 |
| Efr3a | 0.02564231 | 0.296835358 | 0.17 | 0.105 | 1 |
| Nme7 | 0.025784704 | -0.362965941 | 0.167 | 0.235 | 1 |
| Cldnd1 | 0.025869169 | -0.271084396 | 0.061 | 0.109 | 1 |
| Tshz1 | 0.026370992 | -0.313273191 | 0.091 | 0.147 | 1 |
| Gm44593 | 0.026491105 | -0.320966428 | 0.078 | 0.13 | 1 |
| Arpc3 | 0.026622421 | -0.389979163 | 0.152 | 0.214 | 1 |
| Pbx1 | 0.026769712 | -0.290614796 | 0.478 | 0.542 | 1 |
| Prickle1 | 0.026987863 | 0.26973023 | 0.218 | 0.143 | 1 |
| Arid4a | 0.027030466 | -0.302583378 | 0.327 | 0.416 | 1 |
| Efna5 | 0.027311352 | 0.293667886 | 0.152 | 0.092 | 1 |
| Ttc19 | 0.027451403 | 0.275936427 | 0.218 | 0.147 | 1 |
| Eif2ak1 | 0.027596062 | -0.273620522 | 0.058 | 0.105 | 1 |
| Glce | 0.027912901 | -0.280204228 | 0.101 | 0.16 | 1 |
| Gm21057 | 0.027981319 | -0.304021731 | 0.089 | 0.143 | 1 |
| Ncf1 | 0.028124498 | 0.317057778 | 0.276 | 0.197 | 1 |
| Ube2k | 0.02813125 | -0.276869144 | 0.334 | 0.416 | 1 |
| Tmeff2 | 0.028356347 | 0.570123429 | 0.329 | 0.252 | 1 |
| Nol4l | 0.028383667 | -0.285707333 | 0.159 | 0.231 | 1 |
| Nedd4l | 0.028620213 | -0.370644705 | 0.352 | 0.416 | 1 |
| Dglucy | 0.028728342 | 0.295207889 | 0.195 | 0.13 | 1 |
| Klhl18 | 0.029100386 | 0.251358389 | 0.154 | 0.092 | 1 |
| Upp2 | 0.029274913 | 0.296161743 | 0.271 | 0.197 | 1 |
| Lmo3 | 0.029469542 | -0.295374953 | 0.119 | 0.181 | 1 |
| AW554918 | 0.029865826 | 0.277590776 | 0.359 | 0.277 | 1 |
| Brinp1 | 0.03027703 | -0.284429363 | 0.195 | 0.269 | 1 |
| Taok3 | 0.030310453 | 0.291435324 | 0.334 | 0.256 | 1 |
| Atp1a1 | 0.030576264 | -0.334739232 | 0.175 | 0.239 | 1 |
| Elavl2 | 0.030825717 | 0.314269313 | 0.109 | 0.059 | 1 |
| Edem2 | 0.030966119 | 0.279173641 | 0.109 | 0.059 | 1 |
| Phactr2 | 0.031302509 | 0.373370431 | 0.322 | 0.248 | 1 |
| Meis2 | 0.031426747 | -0.297083159 | 0.423 | 0.479 | 1 |
| Ano4 | 0.031620439 | 0.385850412 | 0.104 | 0.055 | 1 |
| Map7d2 | 0.031800776 | 0.296728453 | 0.119 | 0.067 | 1 |
| Fnbp1 | 0.031908479 | 0.326888031 | 0.511 | 0.424 | 1 |
| Avl9 | 0.031982123 | 0.257183944 | 0.243 | 0.172 | 1 |
| Snx2 | 0.031995994 | 0.300432093 | 0.258 | 0.185 | 1 |
| Txndc15 | 0.031999846 | -0.337362092 | 0.116 | 0.172 | 1 |
| Gm26836 | 0.0320031 | -0.305429876 | 0.144 | 0.206 | 1 |
| Dgkb | 0.03221301 | -0.362738319 | 0.615 | 0.651 | 1 |
| Tmed5 | 0.032260048 | 0.301294512 | 0.177 | 0.113 | 1 |
| Sema3e | 0.03228032 | -0.349883896 | 0.084 | 0.134 | 1 |
| Plcg1 | 0.032445498 | 0.257769425 | 0.187 | 0.122 | 1 |
| Pgd | 0.032512637 | -0.258637544 | 0.056 | 0.101 | 1 |
| Lacc1 | 0.032637322 | 0.359710013 | 0.233 | 0.16 | 1 |
| Ccdc186 | 0.032776283 | 0.298957887 | 0.119 | 0.067 | 1 |
| Myh9 | 0.032821297 | 0.374679398 | 0.365 | 0.303 | 1 |
| Urgcp | 0.032890999 | 0.272884324 | 0.248 | 0.176 | 1 |
| Got1 | 0.033108875 | -0.388198513 | 0.129 | 0.185 | 1 |
| Col25a1 | 0.033161487 | 0.358753953 | 0.147 | 0.092 | 1 |
| Calb1 | 0.033322891 | -0.317604789 | 0.157 | 0.218 | 1 |
| Snca | 0.03337674 | -0.311009292 | 0.235 | 0.307 | 1 |
| Ogt | 0.033538382 | -0.271289894 | 0.489 | 0.538 | 1 |
| Reps2 | 0.033873644 | -0.303398749 | 0.149 | 0.214 | 1 |
| Klhl13 | 0.034134133 | -0.251337842 | 0.127 | 0.189 | 1 |
| Abi1 | 0.034144803 | 0.298376333 | 0.537 | 0.471 | 1 |
| Selenof | 0.034162517 | -0.464035047 | 0.116 | 0.168 | 1 |
| Ankrd10 | 0.034184507 | 0.289017152 | 0.246 | 0.176 | 1 |
| I830077J02Rik | 0.034234604 | 0.303174074 | 0.165 | 0.105 | 1 |
| Akap11 | 0.034242246 | -0.364216756 | 0.2 | 0.269 | 1 |
| Gabrb3 | 0.034281627 | -0.282127154 | 0.349 | 0.424 | 1 |
| Lars | 0.034356755 | 0.284110544 | 0.18 | 0.118 | 1 |
| Disc1 | 0.034360577 | 0.266827508 | 0.375 | 0.282 | 1 |
| AC162302.1 | 0.034391763 | 0.315327241 | 0.223 | 0.155 | 1 |
| Tmem243 | 0.035112854 | -0.284023142 | 0.278 | 0.353 | 1 |
| Tbk1 | 0.035535405 | 0.266209119 | 0.258 | 0.185 | 1 |
| N4bp1 | 0.035564224 | 0.273168545 | 0.187 | 0.122 | 1 |
| Ptpn5 | 0.035757099 | -0.304820745 | 0.185 | 0.252 | 1 |
| Gm44686 | 0.035758122 | -0.375558538 | 0.127 | 0.185 | 1 |
| Rabep1 | 0.035919221 | 0.255861561 | 0.461 | 0.382 | 1 |
| Ube2e3 | 0.03601125 | -0.354145377 | 0.17 | 0.231 | 1 |
| Itgb3bp | 0.036124351 | 0.31233059 | 0.134 | 0.08 | 1 |
| Cog5 | 0.036650448 | -0.266725294 | 0.438 | 0.508 | 1 |
| Chp1 | 0.037036365 | -0.353680607 | 0.089 | 0.139 | 1 |
| Glt8d1 | 0.037245859 | 0.266418392 | 0.101 | 0.055 | 1 |
| Rnf121 | 0.037465975 | -0.267372909 | 0.076 | 0.126 | 1 |
| Cx3cl1 | 0.037490045 | -0.258759665 | 0.187 | 0.256 | 1 |
| Pigt | 0.038242465 | -0.292832808 | 0.061 | 0.105 | 1 |
| Bicd1 | 0.03833624 | 0.340429975 | 0.203 | 0.143 | 1 |
| Fmnl1 | 0.038626496 | 0.30213244 | 0.154 | 0.097 | 1 |
| Etv1 | 0.038666124 | -0.278804037 | 0.159 | 0.223 | 1 |
| Ip6k1 | 0.038678987 | 0.283786456 | 0.111 | 0.063 | 1 |
| Gm13269 | 0.039184598 | -0.307426689 | 0.099 | 0.151 | 1 |
| Drd2 | 0.039248624 | -0.324082123 | 0.089 | 0.139 | 1 |
| Cacnb4 | 0.039369512 | -0.397705382 | 0.294 | 0.349 | 1 |
| Fam114a2 | 0.039440756 | 0.275894569 | 0.175 | 0.113 | 1 |
| Camk1 | 0.039445538 | 0.254867371 | 0.349 | 0.269 | 1 |
| Chuk | 0.039520517 | 0.312191287 | 0.162 | 0.105 | 1 |
| Glul | 0.041399341 | -0.284219405 | 0.185 | 0.252 | 1 |
| Gm43221 | 0.041608121 | -0.378073522 | 0.159 | 0.214 | 1 |
| Edil3 | 0.041925053 | 0.359706212 | 0.246 | 0.176 | 1 |
| 2010300C02Rik | 0.041939081 | -0.284900571 | 0.165 | 0.227 | 1 |
| Ubl3 | 0.041976583 | -0.349069365 | 0.375 | 0.437 | 1 |
| Hpcal4 | 0.042382929 | -0.342915979 | 0.084 | 0.13 | 1 |
| Dclk2 | 0.042490547 | -0.395314723 | 0.124 | 0.176 | 1 |
| Mfsd14a | 0.042788376 | 0.347187036 | 0.114 | 0.067 | 1 |
| Kcnq5 | 0.042893316 | -0.536903108 | 0.663 | 0.693 | 1 |
| Marf1 | 0.043113782 | 0.308201191 | 0.235 | 0.172 | 1 |
| H2afz | 0.043368312 | -0.255701127 | 0.177 | 0.239 | 1 |
| Ankhd1 | 0.043520536 | -0.291534741 | 0.39 | 0.45 | 1 |
| Ywhah | 0.043599162 | -0.283924976 | 0.286 | 0.353 | 1 |
| Kcnma1 | 0.043899274 | 0.263848511 | 0.562 | 0.487 | 1 |
| Ccdc12 | 0.044019588 | 0.271199206 | 0.185 | 0.126 | 1 |
| Trim26 | 0.044633687 | 0.261415645 | 0.147 | 0.092 | 1 |
| Hmgxb3 | 0.044663676 | 0.273907543 | 0.142 | 0.088 | 1 |
| Neto2 | 0.044852832 | -0.263621461 | 0.177 | 0.239 | 1 |
| Pcdh15 | 0.044864569 | 0.258077788 | 0.19 | 0.126 | 1 |
| Rab31 | 0.044902961 | 0.256174415 | 0.458 | 0.391 | 1 |
| Stxbp3 | 0.044946204 | -0.264252443 | 0.132 | 0.189 | 1 |
| Eef1a1 | 0.045024865 | -0.263792727 | 0.466 | 0.546 | 1 |
| Anapc10 | 0.045261684 | -0.309109435 | 0.129 | 0.185 | 1 |
| Tra2b | 0.045365228 | -0.253456513 | 0.294 | 0.366 | 1 |
| Wdr89 | 0.046010277 | -0.25150155 | 0.154 | 0.218 | 1 |
| Cnrip1 | 0.046068181 | 0.263546342 | 0.142 | 0.088 | 1 |
| Tbc1d22a | 0.04637679 | 0.251081241 | 0.468 | 0.382 | 1 |
| Lingo2 | 0.046405205 | 0.346500929 | 0.527 | 0.445 | 1 |
| Pianp | 0.046663872 | -0.30500824 | 0.094 | 0.143 | 1 |
| Sesn3 | 0.046823701 | -0.278452075 | 0.21 | 0.277 | 1 |
| Hs6st2 | 0.04684639 | -0.264994355 | 0.162 | 0.223 | 1 |
| Cds2 | 0.046882908 | 0.34830694 | 0.256 | 0.193 | 1 |
| Nckap1 | 0.047004957 | -0.386735895 | 0.253 | 0.311 | 1 |
| Atg16l1 | 0.047040484 | -0.286829012 | 0.2 | 0.261 | 1 |
| Ap2m1 | 0.047186736 | -0.28204795 | 0.058 | 0.101 | 1 |
| Nrxn2 | 0.04735098 | 0.294620033 | 0.144 | 0.092 | 1 |
| Auh | 0.047569576 | 0.293874921 | 0.144 | 0.092 | 1 |
| Sfpq | 0.047760508 | -0.274376551 | 0.473 | 0.521 | 1 |
| Glud1 | 0.047957247 | 0.370315573 | 0.278 | 0.218 | 1 |
| Nfasc | 0.048135992 | 0.348514147 | 0.18 | 0.126 | 1 |
| Sh3bp2 | 0.048528449 | 0.30769907 | 0.185 | 0.126 | 1 |
| Rcan2 | 0.049024385 | -0.377325002 | 0.185 | 0.239 | 1 |
| Taok1 | 0.049354991 | -0.266156292 | 0.443 | 0.5 | 1 |
| Nrg3 | 0.049390175 | 0.293946666 | 0.514 | 0.412 | 1 |
| Cep295 | 0.04950242 | 0.317185313 | 0.159 | 0.105 | 1 |
| Mgat4a | 0.049531439 | 0.398933667 | 0.6 | 0.563 | 1 |
| Sez6 | 0.05000444 | -0.264454498 | 0.225 | 0.298 | 1 |
| Atxn2 | 0.050609295 | -0.385437244 | 0.314 | 0.37 | 1 |
| Mphosph9 | 0.050696879 | 0.26214241 | 0.149 | 0.097 | 1 |
| Cep112 | 0.050935406 | 0.391251353 | 0.17 | 0.118 | 1 |
| Slc9a7 | 0.050958958 | 0.266264036 | 0.175 | 0.118 | 1 |
| Rmdn1 | 0.051697896 | 0.265492947 | 0.271 | 0.202 | 1 |
| Nap1l5 | 0.0519949 | 0.272510624 | 0.233 | 0.164 | 1 |
| Tbc1d9 | 0.052629702 | -0.414689909 | 0.271 | 0.328 | 1 |
| Rragd | 0.052743782 | -0.251347407 | 0.073 | 0.118 | 1 |
| Sdhc | 0.052751963 | -0.253241443 | 0.111 | 0.164 | 1 |
| Rapgef1 | 0.052777335 | 0.289954036 | 0.438 | 0.361 | 1 |
| Timp2 | 0.053184807 | 0.273297333 | 0.228 | 0.168 | 1 |
| Mto1 | 0.053740805 | 0.270762673 | 0.129 | 0.08 | 1 |
| Cipc | 0.054388782 | 0.288335574 | 0.167 | 0.113 | 1 |
| Mxi1 | 0.054563196 | 0.279403994 | 0.251 | 0.185 | 1 |
| Aldoa | 0.055084442 | -0.306062146 | 0.289 | 0.353 | 1 |
| Gm15563 | 0.055522748 | -0.326499534 | 0.106 | 0.155 | 1 |
| Smad4 | 0.0562983 | -0.289617902 | 0.165 | 0.227 | 1 |
| Ube2g1 | 0.056534627 | 0.307941125 | 0.309 | 0.239 | 1 |
| Kpna1 | 0.056619312 | -0.273477756 | 0.157 | 0.214 | 1 |
| Ggta1 | 0.056918567 | -0.303501351 | 0.175 | 0.231 | 1 |
| Mkl1 | 0.057089413 | 0.296201016 | 0.349 | 0.282 | 1 |
| Tsc22d1 | 0.057155956 | -0.369862774 | 0.253 | 0.311 | 1 |
| Pde1a | 0.057338881 | -0.337448672 | 0.124 | 0.176 | 1 |
| Hacd3 | 0.057413973 | 0.307844299 | 0.18 | 0.126 | 1 |
| Ap1s1 | 0.057539295 | -0.334320304 | 0.114 | 0.164 | 1 |
| Ncdn | 0.057841381 | -0.255339555 | 0.266 | 0.336 | 1 |
| Kdm5b | 0.058000964 | -0.328968795 | 0.18 | 0.235 | 1 |
| Mmd | 0.058016827 | -0.317220216 | 0.139 | 0.193 | 1 |
| Xrcc4 | 0.058085456 | -0.259297529 | 0.261 | 0.324 | 1 |
| Inf2 | 0.058425832 | -0.306315703 | 0.106 | 0.155 | 1 |
| Atpif1 | 0.058482277 | -0.355811252 | 0.165 | 0.223 | 1 |
| Icam1 | 0.058694613 | 0.268598051 | 0.106 | 0.063 | 1 |
| Nek9 | 0.058700185 | 0.284201663 | 0.185 | 0.13 | 1 |
| Efnb2 | 0.058976986 | -0.274113408 | 0.116 | 0.168 | 1 |
| Dld | 0.05924007 | 0.262668659 | 0.106 | 0.063 | 1 |
| Itgb1 | 0.059401977 | 0.255676584 | 0.246 | 0.185 | 1 |
| Ppp6r3 | 0.059402458 | -0.364980746 | 0.311 | 0.357 | 1 |
| Atp9b | 0.05982832 | 0.254018116 | 0.38 | 0.319 | 1 |
| Vps29 | 0.059880876 | -0.332676177 | 0.134 | 0.185 | 1 |
| Vgf | 0.060387748 | -0.284058565 | 0.152 | 0.21 | 1 |
| Rrp1 | 0.060509264 | -0.250101075 | 0.116 | 0.168 | 1 |
| Megf9 | 0.060856914 | -0.355941414 | 0.119 | 0.168 | 1 |
| Nfya | 0.061046473 | 0.292018792 | 0.111 | 0.067 | 1 |
| Mapk8ip3 | 0.061165903 | 0.284299159 | 0.2 | 0.143 | 1 |
| Plekha1 | 0.061237965 | 0.28576194 | 0.261 | 0.202 | 1 |
| Ikbkb | 0.061446596 | -0.31253712 | 0.165 | 0.223 | 1 |
| Serpine2 | 0.062094237 | -0.261004641 | 0.405 | 0.479 | 1 |
| Eefsec | 0.062365385 | 0.251183808 | 0.213 | 0.155 | 1 |
| Gatad1 | 0.062493872 | -0.363428922 | 0.099 | 0.143 | 1 |
| Zfp365 | 0.064317981 | 0.287145507 | 0.142 | 0.092 | 1 |
| Nxph1 | 0.064342122 | 0.257431387 | 0.129 | 0.08 | 1 |
| Ntan1 | 0.064350852 | 0.282335628 | 0.122 | 0.076 | 1 |
| Impad1 | 0.064460464 | -0.290387409 | 0.137 | 0.189 | 1 |
| Pde1b | 0.065221404 | -0.285457561 | 0.258 | 0.315 | 1 |
| Stxbp5 | 0.06579209 | -0.25604077 | 0.365 | 0.429 | 1 |
| Znrf2 | 0.065796905 | 0.332757928 | 0.306 | 0.248 | 1 |
| Sap130 | 0.066473955 | 0.296441263 | 0.197 | 0.143 | 1 |
| Gfpt1 | 0.066691952 | 0.266608718 | 0.154 | 0.105 | 1 |
| Sumo1 | 0.066702955 | -0.310237142 | 0.215 | 0.273 | 1 |
| Homer1 | 0.066735596 | -0.345369488 | 0.241 | 0.298 | 1 |
| Susd4 | 0.066892498 | -0.335503314 | 0.073 | 0.113 | 1 |
| Ralgapa2 | 0.067158616 | -0.295393954 | 0.235 | 0.294 | 1 |
| Skp1a | 0.068379618 | -0.320412641 | 0.066 | 0.105 | 1 |
| Tmem158 | 0.068408236 | -0.327292692 | 0.258 | 0.319 | 1 |
| Dicer1 | 0.068447407 | 0.262541667 | 0.208 | 0.151 | 1 |
| Synpr | 0.068496626 | -0.4389897 | 0.18 | 0.227 | 1 |
| Dpf2 | 0.06908468 | 0.336083372 | 0.114 | 0.071 | 1 |
| Ube4b | 0.069108312 | 0.27766088 | 0.273 | 0.214 | 1 |
| Hdgfl3 | 0.069531876 | 0.28465349 | 0.167 | 0.118 | 1 |
| Secisbp2l | 0.069819408 | 0.251884212 | 0.19 | 0.134 | 1 |
| Cotl1 | 0.070151838 | 0.304530134 | 0.197 | 0.143 | 1 |
| Negr1 | 0.070156392 | -0.376530198 | 0.506 | 0.559 | 1 |
| Adap2os | 0.070211288 | -0.343350736 | 0.301 | 0.349 | 1 |
| Hsph1 | 0.070505788 | -0.265900083 | 0.104 | 0.151 | 1 |
| Rftn1 | 0.070569146 | 0.255856802 | 0.106 | 0.063 | 1 |
| Strbp | 0.070660932 | -0.263923955 | 0.433 | 0.487 | 1 |
| 1700084C06Rik | 0.072036582 | -0.303654082 | 0.106 | 0.151 | 1 |
| Focad | 0.072590734 | -0.306856038 | 0.213 | 0.269 | 1 |
| Zfp277 | 0.07269426 | 0.292653394 | 0.21 | 0.155 | 1 |
| 2610020C07Rik | 0.072729205 | -0.313123091 | 0.185 | 0.235 | 1 |
| Babam1 | 0.07293707 | -0.273434935 | 0.073 | 0.113 | 1 |
| Agk | 0.073329908 | 0.294449811 | 0.162 | 0.113 | 1 |
| Il17ra | 0.074261458 | 0.263777512 | 0.129 | 0.084 | 1 |
| Fam45a | 0.074428918 | 0.255844925 | 0.203 | 0.147 | 1 |
| Trim33 | 0.074974355 | -0.284954851 | 0.266 | 0.328 | 1 |
| Lrrc7 | 0.075928683 | -0.288124015 | 0.443 | 0.5 | 1 |
| Usf2 | 0.075930507 | -0.279209924 | 0.139 | 0.189 | 1 |
| Ttc7b | 0.076175291 | 0.284400026 | 0.228 | 0.172 | 1 |
| Nfxl1 | 0.076548039 | 0.288571531 | 0.129 | 0.084 | 1 |
| Hnrnph2 | 0.07697394 | -0.265030206 | 0.071 | 0.109 | 1 |
| Ube4a | 0.077101778 | -0.251790815 | 0.157 | 0.21 | 1 |
| Ntrk2 | 0.077387007 | -0.264612326 | 0.258 | 0.315 | 1 |
| Smurf2 | 0.078099958 | -0.253520238 | 0.41 | 0.466 | 1 |
| Afap1l1 | 0.078550297 | 0.255924244 | 0.159 | 0.109 | 1 |
| Btg2 | 0.078965728 | 0.337711183 | 0.111 | 0.071 | 1 |
| Nfrkb | 0.079651223 | 0.330782512 | 0.154 | 0.109 | 1 |
| Enpp2 | 0.079817774 | 0.251806098 | 0.139 | 0.092 | 1 |
| Epm2a | 0.080267269 | -0.376851931 | 0.124 | 0.168 | 1 |
| Grip1 | 0.080668807 | 0.296953072 | 0.243 | 0.193 | 1 |
| Cerk | 0.080755476 | 0.290589888 | 0.413 | 0.345 | 1 |
| Pot1b | 0.081274816 | 0.284973408 | 0.162 | 0.113 | 1 |
| Sall3 | 0.081902735 | 0.274373889 | 0.238 | 0.181 | 1 |
| Wrn | 0.08209409 | 0.250808573 | 0.192 | 0.139 | 1 |
| Kif13b | 0.082500854 | 0.289260284 | 0.306 | 0.248 | 1 |
| Lcp1 | 0.082542675 | 0.308790187 | 0.296 | 0.239 | 1 |
| Bcas2 | 0.082609805 | -0.347821965 | 0.078 | 0.118 | 1 |
| Rpl32 | 0.083077731 | -0.25346547 | 0.073 | 0.113 | 1 |
| Myo6 | 0.083245476 | 0.263114748 | 0.144 | 0.097 | 1 |
| Gm26733 | 0.083279838 | -0.371287741 | 0.2 | 0.244 | 1 |
| Tnik | 0.083287182 | -0.292960202 | 0.284 | 0.345 | 1 |
| Park7 | 0.083320657 | -0.392609846 | 0.084 | 0.122 | 1 |
| Rab2a | 0.083345117 | 0.255646197 | 0.415 | 0.349 | 1 |
| 2610035D17Rik | 0.083835113 | 0.286642835 | 0.195 | 0.143 | 1 |
| Map2k1 | 0.083966254 | -0.275229587 | 0.362 | 0.424 | 1 |
| Cplx2 | 0.084188886 | -0.321249877 | 0.18 | 0.231 | 1 |
| Eef2k | 0.084345016 | -0.278375273 | 0.266 | 0.319 | 1 |
| Herpud2 | 0.0844167 | -0.28860052 | 0.116 | 0.164 | 1 |
| Zfp398 | 0.084663664 | 0.315845251 | 0.195 | 0.147 | 1 |
| Dcaf13 | 0.084718 | 0.281290172 | 0.101 | 0.063 | 1 |
| Rasa4 | 0.085397293 | 0.282885262 | 0.17 | 0.122 | 1 |
| Stx18 | 0.08560587 | -0.263672544 | 0.177 | 0.227 | 1 |
| Rnf26 | 0.08590027 | -0.261577773 | 0.096 | 0.139 | 1 |
| Gnal | 0.086390225 | -0.337118868 | 0.316 | 0.357 | 1 |
| Rasal2 | 0.086685697 | 0.295874612 | 0.41 | 0.353 | 1 |
| C1qtnf4 | 0.087187161 | -0.272606597 | 0.228 | 0.282 | 1 |
| 9330159F19Rik | 0.087657776 | -0.25983441 | 0.068 | 0.105 | 1 |
| Zdhhc18 | 0.088129315 | -0.287674736 | 0.104 | 0.147 | 1 |
| Snn | 0.088645049 | -0.287983982 | 0.099 | 0.143 | 1 |
| Cox7c | 0.088649086 | 0.263397479 | 0.137 | 0.092 | 1 |
| Rnf185 | 0.089291791 | 0.269261436 | 0.101 | 0.063 | 1 |
| Lemd3 | 0.091011966 | -0.295495056 | 0.182 | 0.231 | 1 |
| Spidr | 0.092254033 | 0.267343147 | 0.165 | 0.118 | 1 |
| Rit1.1 | 0.092876551 | -0.251396648 | 0.289 | 0.34 | 1 |
| Zdbf2 | 0.09358374 | -0.25083736 | 0.068 | 0.105 | 1 |
| Cacna1e | 0.093842206 | -0.313630644 | 0.246 | 0.298 | 1 |
| Gm37240 | 0.094782775 | -0.357343046 | 0.309 | 0.357 | 1 |
| Taf1c | 0.095400068 | -0.265445669 | 0.106 | 0.147 | 1 |
| Timmdc1 | 0.096645778 | -0.297818895 | 0.091 | 0.13 | 1 |
| Maged1 | 0.097159567 | -0.28795246 | 0.152 | 0.197 | 1 |
| Gm19710 | 0.09759091 | -0.283568136 | 0.101 | 0.143 | 1 |
| Slc30a9 | 0.098206086 | -0.304971156 | 0.23 | 0.282 | 1 |
| Sept3 | 0.098753602 | -0.293725505 | 0.073 | 0.109 | 1 |
| Galnt13 | 0.099194582 | -0.317667058 | 0.344 | 0.391 | 1 |
| Phlpp1 | 0.100170628 | 0.324680838 | 0.339 | 0.286 | 1 |
| Chst1 | 0.100208464 | -0.283531171 | 0.172 | 0.218 | 1 |
| Adamts6 | 0.100229089 | -0.328050494 | 0.114 | 0.155 | 1 |
| Nr1d2 | 0.100317303 | -0.321513561 | 0.225 | 0.273 | 1 |
| Ppia | 0.100444203 | -0.278365181 | 0.311 | 0.366 | 1 |
| Hacd2 | 0.100580991 | -0.252147653 | 0.114 | 0.16 | 1 |
| Rbpms | 0.100643516 | -0.335354412 | 0.073 | 0.109 | 1 |
| Astn1 | 0.100791751 | -0.289295357 | 0.175 | 0.218 | 1 |
| Dhrs7b | 0.100791822 | -0.282142114 | 0.066 | 0.101 | 1 |
| Slc7a14 | 0.101023033 | -0.269025121 | 0.106 | 0.147 | 1 |
| Anapc4 | 0.106739005 | -0.339251027 | 0.109 | 0.147 | 1 |
| Gap43 | 0.10676651 | -0.29367752 | 0.203 | 0.256 | 1 |
| Pold3 | 0.108600756 | 0.322372252 | 0.106 | 0.071 | 1 |
| Wdr17 | 0.109119625 | -0.350988298 | 0.144 | 0.189 | 1 |
| Stox2 | 0.109245208 | -0.274499986 | 0.258 | 0.298 | 1 |
| Kcnab1 | 0.110151614 | -0.39201865 | 0.301 | 0.345 | 1 |
| Gmpr | 0.110624324 | -0.307089788 | 0.101 | 0.139 | 1 |
| Ensa | 0.1108695 | 0.279206117 | 0.18 | 0.134 | 1 |
| Oaz1 | 0.11132814 | -0.332269959 | 0.182 | 0.231 | 1 |
| Zfp512 | 0.111523255 | 0.295592848 | 0.17 | 0.126 | 1 |
| Tomm70a | 0.112443352 | -0.35990216 | 0.187 | 0.231 | 1 |
| Zc3hav1 | 0.112867637 | 0.259205557 | 0.147 | 0.105 | 1 |
| Adamts16 | 0.114038728 | 0.26376487 | 0.225 | 0.172 | 1 |
| Gas6 | 0.114533462 | 0.262584792 | 0.17 | 0.126 | 1 |
| Rgs20 | 0.115268074 | -0.380825233 | 0.142 | 0.189 | 1 |
| Flnb | 0.115411399 | -0.283457386 | 0.134 | 0.176 | 1 |
| Pex5l | 0.11669798 | 0.426569993 | 0.137 | 0.097 | 1 |
| Zcchc18 | 0.117263857 | -0.273381927 | 0.159 | 0.202 | 1 |
| Mafb | 0.118439583 | 0.251939987 | 0.215 | 0.164 | 1 |
| Tsn | 0.118538473 | -0.276394969 | 0.096 | 0.134 | 1 |
| Kif1b | 0.118742154 | 0.287521186 | 0.435 | 0.387 | 1 |
| Aff4 | 0.118971021 | 0.308568674 | 0.39 | 0.332 | 1 |
| Ccdc50 | 0.119308236 | 0.250178016 | 0.403 | 0.349 | 1 |
| Map4k3 | 0.123201764 | 0.271052746 | 0.309 | 0.261 | 1 |
| Atad1 | 0.123478143 | -0.265087051 | 0.17 | 0.214 | 1 |
| Pcdh10 | 0.123720273 | -0.267909249 | 0.22 | 0.265 | 1 |
| Rbms1 | 0.125839737 | 0.260271888 | 0.233 | 0.185 | 1 |
| Sst | 0.126712457 | -0.280663885 | 0.241 | 0.282 | 1 |
| Tsg101 | 0.126966378 | -0.293845651 | 0.152 | 0.193 | 1 |
| Nae1 | 0.128234018 | -0.250306652 | 0.086 | 0.122 | 1 |
| Mog | 0.129408842 | 0.276082828 | 0.106 | 0.071 | 1 |
| Syne1 | 0.129583754 | -0.320697961 | 0.278 | 0.319 | 1 |
| Ptprm | 0.130154525 | 0.326665342 | 0.554 | 0.517 | 1 |
| Cfap74 | 0.130192748 | -0.25294899 | 0.23 | 0.277 | 1 |
| Arhgap24 | 0.130867273 | 0.260240019 | 0.225 | 0.172 | 1 |
| Sergef | 0.131628543 | 0.31551197 | 0.157 | 0.118 | 1 |
| Myo1b | 0.131840281 | 0.251224616 | 0.243 | 0.193 | 1 |
| Rab3gap2 | 0.133165261 | -0.265349557 | 0.152 | 0.197 | 1 |
| Pdzd2 | 0.135261396 | -0.262000994 | 0.127 | 0.168 | 1 |
| Ralb | 0.135332005 | -0.308069586 | 0.152 | 0.193 | 1 |
| Ski | 0.135449978 | 0.263692343 | 0.529 | 0.508 | 1 |
| Atp6v1d | 0.140657362 | -0.258942648 | 0.142 | 0.185 | 1 |
| St18 | 0.143330083 | 0.517108414 | 0.106 | 0.071 | 1 |
| Mat2a | 0.145128576 | -0.260144239 | 0.2 | 0.244 | 1 |
| Rnf114 | 0.146803893 | 0.287453923 | 0.124 | 0.088 | 1 |
| Neat1 | 0.147205131 | 0.264393242 | 0.152 | 0.113 | 1 |
| Rif1 | 0.149130309 | -0.251868359 | 0.154 | 0.197 | 1 |
| Chst11 | 0.150400373 | 0.293629594 | 0.306 | 0.261 | 1 |
| Mmaa | 0.150894071 | -0.279525769 | 0.078 | 0.109 | 1 |
| Gm26740 | 0.151355856 | 0.28009137 | 0.218 | 0.172 | 1 |
| Gm12185 | 0.151931371 | 0.280579761 | 0.187 | 0.147 | 1 |
| Cfdp1 | 0.154087314 | -0.285475271 | 0.142 | 0.181 | 1 |
| Srp14 | 0.158755183 | -0.281555842 | 0.078 | 0.109 | 1 |
| Supt20 | 0.159048394 | -0.271038706 | 0.225 | 0.269 | 1 |
| Aftph | 0.159936254 | -0.250498117 | 0.522 | 0.542 | 1 |
| Gm34408 | 0.162366069 | -0.289466072 | 0.096 | 0.13 | 1 |
| Hnrnpd | 0.1629287 | -0.258157241 | 0.2 | 0.244 | 1 |
| Smad2 | 0.166758723 | -0.275262408 | 0.17 | 0.206 | 1 |
| Enox1 | 0.167333927 | -0.38214466 | 0.172 | 0.21 | 1 |
| Ints8 | 0.167738726 | 0.253582627 | 0.159 | 0.122 | 1 |
| Gm47167 | 0.167983596 | -0.286445125 | 0.084 | 0.113 | 1 |
| Cramp1l | 0.168125884 | 0.31788443 | 0.185 | 0.147 | 1 |
| Srsf5 | 0.169644351 | 0.26151565 | 0.471 | 0.441 | 1 |
| Epsti1 | 0.170040208 | 0.277285796 | 0.235 | 0.193 | 1 |
| Nipa2 | 0.171375654 | -0.260895088 | 0.203 | 0.244 | 1 |
| Cttnbp2 | 0.175850838 | -0.307639356 | 0.301 | 0.336 | 1 |
| Gpr34 | 0.17831737 | -0.251675145 | 0.397 | 0.437 | 1 |
| Spcs2 | 0.178356394 | -0.267620703 | 0.132 | 0.168 | 1 |
| Kdm5d | 0.178561018 | 0.279248634 | 0.124 | 0.092 | 1 |
| Fgfr2 | 0.181261491 | 0.289604361 | 0.451 | 0.412 | 1 |
| Rnf135 | 0.182906288 | -0.305018954 | 0.081 | 0.109 | 1 |
| Gm26827 | 0.184450921 | -0.333999034 | 0.165 | 0.202 | 1 |
| Csnk1d | 0.185593879 | 0.295110737 | 0.154 | 0.122 | 1 |
| Phf10 | 0.186100327 | -0.255271908 | 0.084 | 0.113 | 1 |
| Tox4 | 0.187847885 | 0.252858086 | 0.185 | 0.147 | 1 |
| Caln1 | 0.189993413 | -0.30217234 | 0.281 | 0.315 | 1 |
| Vsir | 0.192479963 | -0.274321075 | 0.362 | 0.378 | 1 |
| Tbcd | 0.195498452 | -0.25752289 | 0.18 | 0.218 | 1 |
| Mapt | 0.196239942 | 0.313979716 | 0.172 | 0.139 | 1 |
| 4933434E20Rik | 0.198566817 | -0.323081803 | 0.177 | 0.206 | 1 |
| Gclm | 0.199017138 | -0.322600463 | 0.099 | 0.126 | 1 |
| Tax1bp1 | 0.200998309 | -0.266542491 | 0.218 | 0.256 | 1 |
| Zc3h15 | 0.204789086 | -0.276750114 | 0.165 | 0.202 | 1 |
| Wdr11 | 0.208993469 | -0.257693622 | 0.101 | 0.13 | 1 |
| Paip2 | 0.20951454 | -0.266651192 | 0.22 | 0.256 | 1 |
| Pde6d | 0.212192439 | -0.255083788 | 0.078 | 0.105 | 1 |
| Neurl1a | 0.214669053 | -0.276193338 | 0.124 | 0.155 | 1 |
| Cenpc1 | 0.217275406 | 0.318725427 | 0.165 | 0.134 | 1 |
| Ybx1 | 0.223137691 | -0.262674382 | 0.124 | 0.155 | 1 |
| Laptm4a | 0.223333917 | -0.30975652 | 0.177 | 0.21 | 1 |
| Hsbp1 | 0.225886098 | -0.266946036 | 0.094 | 0.122 | 1 |
| Creb3l2 | 0.226937397 | -0.258446625 | 0.129 | 0.16 | 1 |
| Ociad1 | 0.228569299 | 0.261127617 | 0.17 | 0.139 | 1 |
| Prdm2 | 0.234098887 | -0.295872357 | 0.246 | 0.273 | 1 |
| Dek | 0.253946491 | -0.25288141 | 0.119 | 0.147 | 1 |
| Lpgat1 | 0.258181128 | 0.253842694 | 0.281 | 0.248 | 1 |
| Oma1 | 0.262749948 | 0.254403086 | 0.197 | 0.168 | 1 |
| Slc3a2 | 0.272420835 | -0.268693665 | 0.094 | 0.118 | 1 |
| Rps8 | 0.279890823 | -0.255479426 | 0.078 | 0.101 | 1 |
| Itsn1 | 0.291696806 | 0.296361217 | 0.157 | 0.13 | 1 |
| Pom121 | 0.301043904 | -0.29952941 | 0.084 | 0.105 | 1 |
| N4bp2l2 | 0.34515854 | -0.257153181 | 0.289 | 0.307 | 1 |
| Eed | 0.366305381 | 0.255493445 | 0.147 | 0.126 | 1 |
| Prickle2 | 0.371217455 | 0.300053192 | 0.192 | 0.168 | 1 |
| Ick | 0.374923991 | -0.270318015 | 0.094 | 0.113 | 1 |
| Tpt1 | 0.442470552 | -0.25101707 | 0.101 | 0.118 | 1 |
| Slc1a2 | 0.460685774 | -0.359844111 | 0.304 | 0.324 | 1 |
| Tnfrsf11a | 0.465026215 | 0.256108974 | 0.329 | 0.319 | 1 |
| Pde7b | 0.474459456 | -0.25214943 | 0.243 | 0.256 | 1 |
| St8sia4 | 0.487982579 | 0.27888935 | 0.116 | 0.101 | 1 |
| Rnf220 | 0.493061517 | 0.352210868 | 0.159 | 0.143 | 1 |
| Dtna | 0.524197596 | -0.267075388 | 0.149 | 0.164 | 1 |
| Rbpj | 0.545272821 | 0.307192545 | 0.185 | 0.206 | 1 |
| Sfi1 | 0.558751606 | -0.292075174 | 0.208 | 0.214 | 1 |
| Mettl16 | 0.623808988 | -0.269482962 | 0.154 | 0.16 | 1 |
| Htr2c | 0.654063663 | -0.250294006 | 0.165 | 0.172 | 1 |
| Gpc5 | 0.930475439 | -0.270426911 | 0.2 | 0.202 | 1 |

| **Supplemental Table S4. Differentially expressed genes in each cell type generated comparing the control and the mTBI SVZ, related to Figure 2. (Ependymal DEGs)** | | | | | |
| --- | --- | --- | --- | --- | --- |
| Column1 | p_val | avg_log2FC | pct.1 | pct.2 | p_val_adj |
| Gm42418 | 4.67205E-15 | 0.945334373 | 1 | 1 | 1.06116E-10 |
| Cmss1 | 2.82585E-09 | 0.740485538 | 0.987 | 0.951 | 6.41836E-05 |
| Tex26 | 3.62766E-05 | 0.571003171 | 0.347 | 0.074 | 0.823950263 |
| Prelp | 7.27271E-05 | 0.668443014 | 0.52 | 0.222 | 1 |
| Cabcoco1 | 7.49975E-05 | 0.726062747 | 0.84 | 0.704 | 1 |
| Shank2 | 0.000120544 | 0.432407808 | 0.987 | 0.975 | 1 |
| Dync1i1 | 0.000121877 | -0.699306128 | 0.547 | 0.778 | 1 |
| Cdhr3 | 0.000127491 | 0.567307925 | 0.893 | 0.753 | 1 |
| Gm28100 | 0.000148939 | 0.469349964 | 0.2 | 0.012 | 1 |
| Lpin1 | 0.000151658 | 0.602175562 | 0.547 | 0.259 | 1 |
| Srebf1 | 0.000172911 | 0.611263563 | 0.453 | 0.173 | 1 |
| Ccdc33 | 0.000176531 | 0.504174699 | 0.333 | 0.086 | 1 |
| Naa15 | 0.000188624 | -0.647864903 | 0.213 | 0.469 | 1 |
| Kif6 | 0.000194382 | 0.426180494 | 0.987 | 0.963 | 1 |
| A830082K12Rik | 0.000205921 | 0.583078019 | 0.213 | 0.025 | 1 |
| Pign | 0.000216785 | -0.486237047 | 0.28 | 0.593 | 1 |
| Gnas | 0.000261737 | 0.579492141 | 0.88 | 0.741 | 1 |
| Cfap100 | 0.000269303 | 0.528475629 | 0.8 | 0.556 | 1 |
| Tgif1 | 0.000284145 | 0.385433873 | 0.24 | 0.037 | 1 |
| Plekhb1 | 0.000319827 | 0.541951933 | 0.427 | 0.16 | 1 |
| Txnip | 0.000338484 | 0.667822525 | 0.533 | 0.284 | 1 |
| Mettl24 | 0.000401365 | 0.670557033 | 0.347 | 0.123 | 1 |
| Lrrc8b | 0.00040852 | 0.492405058 | 0.467 | 0.185 | 1 |
| Gas6 | 0.000421056 | 0.63689777 | 0.787 | 0.654 | 1 |
| Tubb4b | 0.000431206 | 0.678998248 | 0.68 | 0.42 | 1 |
| Homer1 | 0.00045981 | -0.708251832 | 0.24 | 0.494 | 1 |
| Ehbp1l1 | 0.000466799 | 0.492847499 | 0.267 | 0.062 | 1 |
| Efcc1 | 0.000495968 | 0.367714587 | 0.387 | 0.136 | 1 |
| 1700024G13Rik | 0.000504609 | 0.593360173 | 0.373 | 0.148 | 1 |
| Ssbp4 | 0.00055474 | 0.540007392 | 0.52 | 0.272 | 1 |
| Cry2 | 0.000559225 | 0.475031859 | 0.707 | 0.444 | 1 |
| 5430403G16Rik | 0.000570459 | 0.532138745 | 0.387 | 0.148 | 1 |
| Cdh10 | 0.000599287 | -0.653106229 | 0.08 | 0.296 | 1 |
| Gulp1 | 0.000622727 | -0.601415209 | 0.547 | 0.704 | 1 |
| Ifngr1 | 0.000633213 | 0.368018189 | 0.293 | 0.074 | 1 |
| Gm45025 | 0.00063738 | -0.527409948 | 0.053 | 0.247 | 1 |
| Scn3a | 0.000643118 | -0.569915898 | 0.093 | 0.321 | 1 |
| Eif4a3 | 0.00072622 | 0.301123788 | 0.133 | 0 | 1 |
| Slc32a1 | 0.000733859 | -0.625399026 | 0.133 | 0.37 | 1 |
| Tac1 | 0.000746771 | -0.758193182 | 0.267 | 0.494 | 1 |
| Zmynd12 | 0.000767758 | 0.563589958 | 0.533 | 0.284 | 1 |
| Mllt6 | 0.000776241 | 0.494927263 | 0.293 | 0.086 | 1 |
| Adprh | 0.00078625 | 0.415676957 | 0.28 | 0.074 | 1 |
| Gm38393 | 0.000802092 | -0.613642422 | 0.187 | 0.42 | 1 |
| Dgkb | 0.000827871 | -0.985852381 | 0.48 | 0.716 | 1 |
| Samd4b | 0.000839713 | 0.411612384 | 0.333 | 0.111 | 1 |
| Dnajb2 | 0.000877833 | 0.527917339 | 0.453 | 0.21 | 1 |
| Tmod1 | 0.000877833 | 0.51564148 | 0.453 | 0.21 | 1 |
| Flna | 0.000903948 | 0.400171745 | 0.373 | 0.148 | 1 |
| Ywhab | 0.000919689 | -0.727000615 | 0.2 | 0.432 | 1 |
| Gria1 | 0.000940649 | -0.908742114 | 0.267 | 0.506 | 1 |
| Tpd52l2 | 0.001012966 | -0.487146026 | 0.12 | 0.333 | 1 |
| Wnk2 | 0.001015424 | 0.471086328 | 0.787 | 0.593 | 1 |
| Gm28375 | 0.001045267 | -0.511350281 | 0.16 | 0.395 | 1 |
| Pdcd6 | 0.001048556 | 0.304214641 | 0.36 | 0.123 | 1 |
| C2cd2l | 0.001066887 | -0.521708593 | 0.08 | 0.284 | 1 |
| Npas3 | 0.001143353 | 0.342194395 | 1 | 1 | 1 |
| Ccdc57 | 0.00125896 | 0.391845869 | 0.853 | 0.593 | 1 |
| Pid1 | 0.001338938 | -0.685933816 | 0.48 | 0.691 | 1 |
| Lrrc56 | 0.001402516 | 0.27598494 | 0.267 | 0.074 | 1 |
| Cd55 | 0.001406507 | 0.471678419 | 0.387 | 0.16 | 1 |
| Tspan2 | 0.001428795 | 0.427299357 | 0.387 | 0.16 | 1 |
| Pde1c | 0.00147262 | -0.644673912 | 0.08 | 0.259 | 1 |
| Snta1 | 0.001482348 | 0.584150605 | 0.56 | 0.346 | 1 |
| Fam166b | 0.001608116 | 0.483805473 | 0.32 | 0.111 | 1 |
| Atp5j2 | 0.001627831 | -0.314319768 | 0.04 | 0.21 | 1 |
| Sos1 | 0.00164161 | -0.485664949 | 0.28 | 0.519 | 1 |
| Gria2 | 0.001680351 | -0.768181732 | 0.64 | 0.778 | 1 |
| Rhbdd1 | 0.001924254 | 0.525020622 | 0.56 | 0.333 | 1 |
| Frmpd2 | 0.001927482 | 0.425184556 | 0.907 | 0.778 | 1 |
| Phf20l1 | 0.001929381 | -0.618357536 | 0.493 | 0.679 | 1 |
| Iqcd | 0.001976686 | 0.5022937 | 0.547 | 0.309 | 1 |
| Snap25 | 0.002095647 | -0.40748377 | 0.507 | 0.765 | 1 |
| Slc38a2 | 0.00209958 | -0.532779665 | 0.32 | 0.531 | 1 |
| Bcl7b | 0.002147362 | 0.288696704 | 0.2 | 0.037 | 1 |
| Alkbh8 | 0.002349024 | -0.639395586 | 0.173 | 0.395 | 1 |
| Sh3gl3 | 0.002352649 | -0.476907056 | 0.027 | 0.173 | 1 |
| Ripor2 | 0.00237816 | -0.558523601 | 0.32 | 0.531 | 1 |
| Tubgcp5 | 0.002421234 | 0.365059809 | 0.36 | 0.136 | 1 |
| Msrb3 | 0.002427377 | 0.562146124 | 0.36 | 0.148 | 1 |
| Mns1 | 0.002438391 | 0.439965446 | 0.68 | 0.494 | 1 |
| Musk | 0.002441915 | 0.657358868 | 0.453 | 0.235 | 1 |
| Cdh19 | 0.002454433 | -0.777208447 | 0.373 | 0.556 | 1 |
| Ybx1 | 0.002563162 | 0.46638009 | 0.427 | 0.198 | 1 |
| 1700016K19Rik | 0.002612014 | 0.388299095 | 0.453 | 0.21 | 1 |
| Pla2g7 | 0.002651789 | 0.44848581 | 0.373 | 0.16 | 1 |
| Atp1b2 | 0.002656404 | 0.42858863 | 0.427 | 0.198 | 1 |
| 3300002A11Rik | 0.002661041 | 0.319922223 | 0.973 | 0.963 | 1 |
| Pik3c2g | 0.00276265 | 0.554065714 | 0.347 | 0.148 | 1 |
| Chd7 | 0.002957231 | 0.530578864 | 0.627 | 0.42 | 1 |
| H1f0 | 0.003017524 | 0.351588501 | 0.2 | 0.049 | 1 |
| Gm4756 | 0.003094906 | -0.345876401 | 0 | 0.111 | 1 |
| Odc1 | 0.003126382 | 0.583475603 | 0.413 | 0.21 | 1 |
| Dnah7c | 0.003146572 | 0.465243156 | 0.827 | 0.691 | 1 |
| Irak2 | 0.003170638 | 0.375508038 | 0.413 | 0.21 | 1 |
| Anxa1 | 0.003187318 | 0.281034707 | 0.133 | 0.012 | 1 |
| Pltp | 0.003237476 | 0.397319046 | 0.84 | 0.691 | 1 |
| Prpf31 | 0.003239268 | 0.26076858 | 0.16 | 0.025 | 1 |
| 1700001L19Rik | 0.003251014 | 0.283012598 | 0.28 | 0.099 | 1 |
| Snx3 | 0.003330066 | 0.327987785 | 0.427 | 0.198 | 1 |
| Gxylt1 | 0.003338417 | 0.353161487 | 0.2 | 0.049 | 1 |
| Gna11 | 0.003351398 | 0.475145047 | 0.32 | 0.136 | 1 |
| Mrpl39 | 0.003377017 | 0.254829023 | 0.187 | 0.037 | 1 |
| Reep3 | 0.003624878 | 0.660707141 | 0.44 | 0.235 | 1 |
| Gm48678 | 0.003678376 | -0.474440784 | 0.08 | 0.247 | 1 |
| Als2 | 0.003753174 | -0.346087487 | 0.093 | 0.284 | 1 |
| Ccdc62 | 0.003768425 | 0.527248325 | 0.547 | 0.321 | 1 |
| Zswim2 | 0.003785847 | 0.355427431 | 0.227 | 0.062 | 1 |
| Ube3a | 0.003792132 | -0.620575437 | 0.587 | 0.728 | 1 |
| Gm44151 | 0.003800988 | -0.30756059 | 0.013 | 0.136 | 1 |
| Dok6 | 0.003896451 | -0.810431194 | 0.307 | 0.469 | 1 |
| Ctnnal1 | 0.003938972 | 0.326436608 | 0.413 | 0.185 | 1 |
| Mien1 | 0.004068187 | 0.45999066 | 0.24 | 0.074 | 1 |
| Gm35188 | 0.004075835 | -0.591679292 | 0.48 | 0.642 | 1 |
| Fam212b | 0.004089277 | -0.380958912 | 0.013 | 0.136 | 1 |
| Wipi2 | 0.004099745 | 0.430124912 | 0.32 | 0.136 | 1 |
| Ccdc146 | 0.004125007 | 0.327897005 | 0.96 | 0.889 | 1 |
| Utp11 | 0.004182524 | -0.295943214 | 0.027 | 0.16 | 1 |
| Prmt8 | 0.004182524 | -0.414754941 | 0.027 | 0.16 | 1 |
| Mpv17l | 0.004203527 | 0.571151551 | 0.507 | 0.321 | 1 |
| Acta2 | 0.004292681 | 0.580506235 | 0.32 | 0.136 | 1 |
| Pou6f1 | 0.004298674 | 0.523885749 | 0.573 | 0.358 | 1 |
| Chrm1 | 0.004397274 | -0.429654433 | 0.013 | 0.136 | 1 |
| Gm16599 | 0.004410488 | -0.383837092 | 0.133 | 0.321 | 1 |
| Gpr88 | 0.004500921 | -0.296736724 | 0.467 | 0.667 | 1 |
| Bsg | 0.004501293 | 0.434730823 | 0.493 | 0.272 | 1 |
| Mdh1b | 0.004522794 | 0.402241438 | 0.56 | 0.296 | 1 |
| Syn3 | 0.004568456 | -0.357848827 | 0.187 | 0.407 | 1 |
| Cep41 | 0.004579815 | 0.406651423 | 0.333 | 0.136 | 1 |
| Clec1b | 0.004595277 | 0.397475812 | 0.213 | 0.062 | 1 |
| Akna | 0.004608786 | 0.302960634 | 0.28 | 0.099 | 1 |
| Mapk15 | 0.004652217 | 0.466335007 | 0.693 | 0.481 | 1 |
| Scp2 | 0.004662573 | 0.475778552 | 0.173 | 0.037 | 1 |
| Pdgfa | 0.004767677 | 0.432328839 | 0.347 | 0.16 | 1 |
| Gm48500 | 0.004823903 | 0.370413784 | 0.373 | 0.173 | 1 |
| Daam2 | 0.004951094 | 0.356401948 | 0.213 | 0.062 | 1 |
| Ppp1r15a | 0.00496562 | 0.282275042 | 0.173 | 0.037 | 1 |
| Mapk14 | 0.004988188 | -0.307261616 | 0.107 | 0.296 | 1 |
| Wwc1 | 0.00511922 | 0.356794246 | 0.92 | 0.914 | 1 |
| Zfp800 | 0.005161682 | 0.410534926 | 0.333 | 0.148 | 1 |
| Pak6 | 0.005230646 | 0.392516577 | 0.253 | 0.086 | 1 |
| Gm16083 | 0.005317882 | 0.446294704 | 0.84 | 0.691 | 1 |
| Tle4 | 0.005319043 | -0.496388826 | 0.493 | 0.63 | 1 |
| Mplkip | 0.0054231 | 0.351352763 | 0.267 | 0.099 | 1 |
| Tex2 | 0.005467717 | -0.394543699 | 0.133 | 0.309 | 1 |
| Itpkb | 0.005476914 | 0.443379876 | 0.84 | 0.728 | 1 |
| Ak8 | 0.00551093 | 0.448299002 | 0.68 | 0.506 | 1 |
| Pacs1 | 0.00551806 | -0.324590961 | 0.133 | 0.321 | 1 |
| Iqce | 0.005573611 | 0.441137189 | 0.56 | 0.346 | 1 |
| Itih5 | 0.005608136 | 0.451260051 | 0.453 | 0.235 | 1 |
| Npnt | 0.005694937 | 0.300741941 | 0.52 | 0.296 | 1 |
| Gsn | 0.00580511 | 0.518567551 | 0.64 | 0.444 | 1 |
| Arhgef26 | 0.005813606 | -0.502404955 | 0.693 | 0.79 | 1 |
| Gm12326 | 0.005844394 | 0.32407701 | 0.213 | 0.062 | 1 |
| Gtpbp2 | 0.005867775 | 0.356754148 | 0.227 | 0.074 | 1 |
| Cdh4 | 0.005889141 | -0.630667202 | 0.2 | 0.37 | 1 |
| 1700019G24Rik | 0.006137416 | 0.290820258 | 0.12 | 0.012 | 1 |
| 9630028H03Rik | 0.006208241 | -0.335269199 | 0.04 | 0.185 | 1 |
| Prkce | 0.006236177 | -0.517353052 | 0.533 | 0.667 | 1 |
| A230083N12Rik | 0.006295242 | 0.293685026 | 0.12 | 0.012 | 1 |
| Dsg2 | 0.006337427 | 0.491989889 | 0.52 | 0.321 | 1 |
| Slc9a7 | 0.006340526 | -0.267278845 | 0.08 | 0.247 | 1 |
| Rab28 | 0.00643141 | -0.547619015 | 0.52 | 0.667 | 1 |
| Alk | 0.006436411 | -0.916750155 | 0.133 | 0.309 | 1 |
| Lars2 | 0.006471083 | 0.42232864 | 0.693 | 0.543 | 1 |
| Rad9b | 0.006497922 | 0.348866712 | 0.24 | 0.086 | 1 |
| Mthfsl | 0.006516952 | -0.326867049 | 0.067 | 0.222 | 1 |
| Scrn1 | 0.006547481 | 0.478805765 | 0.613 | 0.444 | 1 |
| Afg1l | 0.006727691 | 0.510105612 | 0.64 | 0.444 | 1 |
| Ppil6 | 0.0067302 | 0.374371529 | 0.8 | 0.704 | 1 |
| Pofut1 | 0.006747285 | -0.336405178 | 0.067 | 0.222 | 1 |
| Src | 0.006830365 | 0.367857613 | 0.373 | 0.173 | 1 |
| Rubcn | 0.006873821 | 0.265746645 | 0.4 | 0.185 | 1 |
| Arhgap39 | 0.006977686 | 0.331752348 | 0.853 | 0.728 | 1 |
| Nudt4 | 0.007023963 | 0.498082326 | 0.853 | 0.753 | 1 |
| Gm3448 | 0.007045985 | 0.306541667 | 0.667 | 0.432 | 1 |
| Pcdh17 | 0.007068756 | -0.649756875 | 0.133 | 0.296 | 1 |
| Dmkn | 0.007159399 | 0.317913923 | 0.36 | 0.173 | 1 |
| Cpeb3 | 0.007246569 | -0.65440667 | 0.347 | 0.494 | 1 |
| Cadps2 | 0.007254308 | 0.613017071 | 0.493 | 0.321 | 1 |
| Pkd2l2 | 0.007550204 | -0.404725257 | 0.08 | 0.235 | 1 |
| Lncpint | 0.007558418 | 0.365530394 | 0.973 | 0.914 | 1 |
| Slc16a11 | 0.007599869 | -0.290211684 | 0.013 | 0.123 | 1 |
| Gm42477 | 0.007599869 | -0.32737543 | 0.013 | 0.123 | 1 |
| Kcnq2 | 0.007610886 | -0.285364519 | 0.04 | 0.173 | 1 |
| Irgm2 | 0.00774369 | 0.256766641 | 0.187 | 0.049 | 1 |
| Tmcc1 | 0.007978845 | -0.415448438 | 0.667 | 0.765 | 1 |
| Gosr2 | 0.00809446 | 0.321023311 | 0.36 | 0.173 | 1 |
| Rhoa | 0.008174552 | 0.526888796 | 0.4 | 0.222 | 1 |
| Clpb | 0.008179683 | -0.482526045 | 0.147 | 0.321 | 1 |
| Atf6 | 0.008222451 | 0.309429566 | 0.653 | 0.432 | 1 |
| Gabarapl1 | 0.008279976 | 0.462050698 | 0.4 | 0.222 | 1 |
| Bank1 | 0.008331766 | 0.402694227 | 0.573 | 0.346 | 1 |
| Gm26804 | 0.008412982 | -0.502778171 | 0.467 | 0.617 | 1 |
| Rell1 | 0.008459666 | 0.300698986 | 0.373 | 0.185 | 1 |
| Ift172 | 0.00852894 | 0.399513588 | 0.453 | 0.259 | 1 |
| Npat | 0.00855574 | -0.51581714 | 0.107 | 0.259 | 1 |
| Ppp1r8 | 0.008556773 | -0.308195036 | 0.027 | 0.148 | 1 |
| Eepd1 | 0.008556773 | -0.257106921 | 0.027 | 0.148 | 1 |
| Hspa14 | 0.008581903 | 0.335489354 | 0.16 | 0.037 | 1 |
| Calcoco2 | 0.008581903 | 0.384993532 | 0.16 | 0.037 | 1 |
| AC124532.2 | 0.008589224 | 0.434270333 | 0.333 | 0.16 | 1 |
| Sft2d1 | 0.008594968 | 0.33249486 | 0.96 | 0.852 | 1 |
| Arpp21 | 0.00860008 | -0.582595849 | 0.373 | 0.543 | 1 |
| Cbll1 | 0.008611203 | 0.358757433 | 0.24 | 0.086 | 1 |
| Gpr137c | 0.008619677 | -0.607334254 | 0.333 | 0.494 | 1 |
| E130114P18Rik | 0.008629808 | -0.485877698 | 0.4 | 0.605 | 1 |
| 9530068E07Rik | 0.008671788 | 0.403928399 | 0.413 | 0.222 | 1 |
| Jam2 | 0.008713941 | 0.489116428 | 0.4 | 0.222 | 1 |
| Tmem126a | 0.008728173 | -0.372986062 | 0.053 | 0.185 | 1 |
| Nr1d1 | 0.008860749 | 0.414738303 | 0.373 | 0.185 | 1 |
| Angptl1 | 0.008886183 | -0.283434336 | 0.04 | 0.173 | 1 |
| Elof1 | 0.008937987 | 0.532529674 | 0.547 | 0.358 | 1 |
| Zfp3 | 0.008938281 | 0.254475763 | 0.16 | 0.037 | 1 |
| Mpp5 | 0.008945588 | 0.35488215 | 0.773 | 0.58 | 1 |
| Gm20045 | 0.009121379 | 0.337185775 | 0.16 | 0.037 | 1 |
| Lasp1 | 0.009278228 | 0.252556531 | 0.467 | 0.259 | 1 |
| Adgrb3 | 0.009320702 | -0.384737604 | 0.947 | 0.975 | 1 |
| Higd1a | 0.009495557 | -0.393091246 | 0.04 | 0.16 | 1 |
| Atf4 | 0.009623003 | 0.293034854 | 0.2 | 0.062 | 1 |
| Prdm10 | 0.009639479 | -0.583615327 | 0.173 | 0.333 | 1 |
| Bdh1 | 0.00966795 | 0.321230739 | 0.333 | 0.148 | 1 |
| Map1lc3a | 0.009770975 | 0.426682004 | 0.307 | 0.148 | 1 |
| Apoe | 0.009814558 | 0.504162911 | 0.947 | 0.988 | 1 |
| Phka1 | 0.00990002 | -0.420153358 | 0.2 | 0.383 | 1 |
| 1110002L01Rik | 0.009932131 | 0.298280113 | 0.307 | 0.136 | 1 |
| St6galnac5 | 0.009962494 | -0.468036919 | 0.08 | 0.235 | 1 |
| Tead3 | 0.009969742 | 0.283377056 | 0.2 | 0.062 | 1 |
| Maml2 | 0.010121995 | 0.301329263 | 0.973 | 0.975 | 1 |
| Pea15a | 0.010143514 | 0.326427951 | 0.32 | 0.148 | 1 |
| Tbc1d17 | 0.010230171 | 0.292841261 | 0.133 | 0.025 | 1 |
| Ccdc153 | 0.010266413 | 0.459121272 | 0.773 | 0.716 | 1 |
| Gpr37l1 | 0.010438302 | 0.471762452 | 0.52 | 0.358 | 1 |
| Rab31 | 0.010525911 | 0.304628017 | 0.573 | 0.358 | 1 |
| Wdr19 | 0.010556471 | 0.463712875 | 0.56 | 0.321 | 1 |
| Gm44109 | 0.010575526 | 0.337875293 | 0.347 | 0.16 | 1 |
| Cadm4 | 0.010584296 | 0.401623658 | 0.267 | 0.111 | 1 |
| Gm42439 | 0.010654326 | -0.362799369 | 0.053 | 0.185 | 1 |
| Plcd3 | 0.010763246 | 0.434392618 | 0.28 | 0.123 | 1 |
| Atg5 | 0.010834924 | -0.264966587 | 0.08 | 0.222 | 1 |
| Zfand2a | 0.010909331 | 0.284849709 | 0.107 | 0.012 | 1 |
| Vgf | 0.010965441 | -0.323079834 | 0.067 | 0.21 | 1 |
| Ccdc74a | 0.011235536 | 0.333380342 | 0.387 | 0.21 | 1 |
| Cxxc5 | 0.011235536 | 0.423115659 | 0.387 | 0.21 | 1 |
| Ipmk | 0.011266092 | 0.33484456 | 0.253 | 0.099 | 1 |
| Lbp | 0.011398229 | 0.425797557 | 0.573 | 0.407 | 1 |
| Tmem5 | 0.011434078 | 0.317773646 | 0.213 | 0.074 | 1 |
| Lzts2 | 0.011440289 | 0.277216804 | 0.253 | 0.099 | 1 |
| Mrpl28 | 0.011470325 | 0.324805134 | 0.107 | 0.012 | 1 |
| Clic6 | 0.011577455 | 0.425762122 | 0.267 | 0.111 | 1 |
| Mau2 | 0.011626685 | 0.338169819 | 0.32 | 0.16 | 1 |
| Dnah5 | 0.011640412 | 0.313880183 | 0.947 | 0.877 | 1 |
| Kcnq1ot1 | 0.011654207 | 0.320669127 | 0.92 | 0.79 | 1 |
| Sparc | 0.011677011 | 0.425532624 | 0.653 | 0.506 | 1 |
| Rbms2 | 0.011682684 | 0.257313027 | 0.24 | 0.086 | 1 |
| Rbm4b | 0.01176088 | -0.382785356 | 0.093 | 0.235 | 1 |
| Tlr4 | 0.011825167 | 0.281050405 | 0.16 | 0.037 | 1 |
| Zfp971 | 0.011868179 | -0.257950385 | 0.027 | 0.136 | 1 |
| Nfic | 0.01187191 | 0.438528583 | 0.533 | 0.346 | 1 |
| C530044C16Rik | 0.01197652 | -0.34319032 | 0.04 | 0.16 | 1 |
| Ptk2b | 0.012068746 | -0.354825687 | 0.053 | 0.185 | 1 |
| Ssrp1 | 0.01208313 | 0.323033966 | 0.2 | 0.062 | 1 |
| Ssr3 | 0.012161994 | 0.353921575 | 0.36 | 0.185 | 1 |
| Aamdc | 0.012207158 | -0.333727971 | 0.04 | 0.16 | 1 |
| Slit2 | 0.012214237 | 0.512512719 | 0.427 | 0.235 | 1 |
| Hist1h1c | 0.012261737 | 0.275735179 | 0.307 | 0.136 | 1 |
| Slc2a9 | 0.012283839 | 0.376787141 | 0.187 | 0.062 | 1 |
| Kcnrg | 0.012283839 | -0.37030762 | 0.053 | 0.185 | 1 |
| Grik4 | 0.01234528 | 0.414349495 | 0.693 | 0.531 | 1 |
| Acot9 | 0.012375944 | -0.331027907 | 0.027 | 0.136 | 1 |
| Ctps | 0.012441723 | -0.275560657 | 0.04 | 0.16 | 1 |
| Ptchd4 | 0.012441723 | -0.431540694 | 0.04 | 0.16 | 1 |
| Col6a4 | 0.012459428 | 0.268347256 | 0.133 | 0.025 | 1 |
| Foxn2 | 0.012520424 | 0.396412135 | 0.227 | 0.086 | 1 |
| Lrrc74b | 0.012596621 | 0.322951631 | 0.76 | 0.593 | 1 |
| Ube4b | 0.012645786 | -0.426613204 | 0.453 | 0.642 | 1 |
| Rnf149 | 0.012653486 | -0.275178583 | 0.107 | 0.272 | 1 |
| 1700034H15Rik | 0.012669654 | 0.260220946 | 0.107 | 0.012 | 1 |
| Hmgcr | 0.012724238 | -0.289806142 | 0.053 | 0.185 | 1 |
| Afap1l2 | 0.01273326 | 0.451997 | 0.707 | 0.519 | 1 |
| Mta3 | 0.013063507 | 0.265347418 | 0.4 | 0.21 | 1 |
| Efhc1 | 0.013120927 | 0.428045631 | 0.56 | 0.383 | 1 |
| Ubxn10 | 0.013151833 | 0.512785548 | 0.32 | 0.173 | 1 |
| Ncoa2 | 0.013157933 | -0.34434736 | 0.76 | 0.877 | 1 |
| Lrrtm4 | 0.013173326 | -0.786197475 | 0.52 | 0.667 | 1 |
| Hkdc1 | 0.013186335 | 0.450744047 | 0.173 | 0.049 | 1 |
| Topors | 0.013242178 | 0.364791089 | 0.32 | 0.148 | 1 |
| Gabarap | 0.013291622 | 0.343537805 | 0.373 | 0.198 | 1 |
| Gabrr2 | 0.013306793 | 0.526870727 | 0.147 | 0.037 | 1 |
| Fgd6 | 0.013447103 | -0.433583594 | 0.08 | 0.222 | 1 |
| Penk | 0.013542125 | -0.569627271 | 0.32 | 0.481 | 1 |
| Otub2 | 0.013713916 | 0.304271434 | 0.213 | 0.074 | 1 |
| Gsdme | 0.013762317 | -0.352604537 | 0.067 | 0.198 | 1 |
| Poc5 | 0.013791016 | 0.314263878 | 0.4 | 0.198 | 1 |
| Rps25 | 0.013814877 | 0.346922003 | 0.267 | 0.111 | 1 |
| Etl4 | 0.013921993 | 0.294413897 | 0.693 | 0.444 | 1 |
| Snca | 0.013954295 | -0.31609397 | 0.147 | 0.333 | 1 |
| Camkk2 | 0.014017524 | -0.449770341 | 0.107 | 0.259 | 1 |
| Arhgap42 | 0.014033614 | 0.333639486 | 0.64 | 0.469 | 1 |
| Ncam2 | 0.01407851 | -0.696041876 | 0.587 | 0.691 | 1 |
| L3mbtl3 | 0.014106463 | -0.510597561 | 0.24 | 0.42 | 1 |
| Gm19951 | 0.014130411 | 0.254270032 | 0.187 | 0.062 | 1 |
| Csmd3 | 0.01417382 | -0.335608293 | 0.947 | 0.988 | 1 |
| Mlc1 | 0.014280359 | 0.36863296 | 0.533 | 0.358 | 1 |
| Dhrs7b | 0.014411748 | 0.383175967 | 0.147 | 0.037 | 1 |
| Zfp260 | 0.014430704 | -0.334716343 | 0.107 | 0.259 | 1 |
| Lactb2 | 0.014433879 | 0.379319561 | 0.227 | 0.086 | 1 |
| Olah | 0.014446952 | 0.488168873 | 0.307 | 0.16 | 1 |
| Kif21a | 0.014570893 | -0.36750722 | 0.72 | 0.877 | 1 |
| Luzp2 | 0.014697766 | -0.712086227 | 0.253 | 0.407 | 1 |
| Shoc2 | 0.014800619 | 0.407366264 | 0.493 | 0.321 | 1 |
| Nudc | 0.014925556 | 0.397218567 | 0.467 | 0.309 | 1 |
| Araf | 0.015009272 | -0.376448147 | 0.293 | 0.469 | 1 |
| Negr1 | 0.015095737 | -0.57946688 | 0.84 | 0.864 | 1 |
| Tigd4 | 0.015126701 | 0.347377657 | 0.227 | 0.086 | 1 |
| Slc30a1 | 0.015137568 | 0.376326365 | 0.24 | 0.099 | 1 |
| Rnf180 | 0.015250644 | 0.629932973 | 0.72 | 0.63 | 1 |
| 4933406C10Rik | 0.015298299 | 0.393759753 | 0.52 | 0.346 | 1 |
| Slmap | 0.01535062 | -0.4415773 | 0.507 | 0.679 | 1 |
| Phlpp2 | 0.015372081 | -0.33358551 | 0.133 | 0.296 | 1 |
| Ppp1r12c | 0.01537632 | 0.384803995 | 0.32 | 0.16 | 1 |
| Larp1 | 0.015520836 | 0.367258359 | 0.373 | 0.198 | 1 |
| Atrnl1 | 0.01558662 | 0.442205637 | 0.453 | 0.259 | 1 |
| Wdr27 | 0.015814892 | 0.416396067 | 0.613 | 0.444 | 1 |
| Rae1 | 0.015828248 | 0.328538084 | 0.28 | 0.123 | 1 |
| Tmem55a | 0.015838027 | -0.302349664 | 0.213 | 0.395 | 1 |
| Spag17 | 0.015919001 | 0.37726505 | 0.933 | 0.914 | 1 |
| Jak2 | 0.016000715 | -0.440095669 | 0.427 | 0.556 | 1 |
| Hs6st1 | 0.016095937 | 0.331112038 | 0.227 | 0.086 | 1 |
| Wnt4 | 0.016161064 | 0.362348596 | 0.507 | 0.309 | 1 |
| Gas1 | 0.016220926 | 0.260995531 | 0.147 | 0.037 | 1 |
| Lancl1 | 0.01643815 | -0.404342517 | 0.107 | 0.247 | 1 |
| Lrmp | 0.016600716 | 0.30242338 | 0.227 | 0.086 | 1 |
| Atp6v1b2 | 0.016636793 | -0.569460923 | 0.213 | 0.383 | 1 |
| Cdk5r1 | 0.016664508 | -0.310811403 | 0.133 | 0.296 | 1 |
| Atp6v1h | 0.017060801 | -0.408660878 | 0.347 | 0.494 | 1 |
| 4932443I19Rik | 0.017091991 | 0.392719656 | 0.76 | 0.568 | 1 |
| Zfp335os | 0.017119345 | 0.293115993 | 0.227 | 0.086 | 1 |
| Tagln | 0.017173064 | 0.543312904 | 0.28 | 0.136 | 1 |
| Hrk | 0.017195731 | 0.266522951 | 0.36 | 0.185 | 1 |
| Mroh5 | 0.017198196 | 0.328388253 | 0.147 | 0.037 | 1 |
| Akap1 | 0.017232204 | -0.411969934 | 0.053 | 0.173 | 1 |
| Abi2 | 0.017285658 | -0.328579362 | 0.373 | 0.568 | 1 |
| Tspan15 | 0.017658255 | 0.421805262 | 0.56 | 0.383 | 1 |
| Tnrc6b | 0.017847409 | 0.379893295 | 0.92 | 0.815 | 1 |
| Tpm3 | 0.017918044 | -0.442400939 | 0.267 | 0.42 | 1 |
| Ppip5k2 | 0.01797044 | -0.270707463 | 0.093 | 0.235 | 1 |
| Gm6994 | 0.018042035 | -0.268871824 | 0.04 | 0.148 | 1 |
| Sgcb | 0.018183551 | 0.300008846 | 0.32 | 0.148 | 1 |
| AC114585.2 | 0.01839065 | 0.305478659 | 0.12 | 0.025 | 1 |
| Cdh18 | 0.01852827 | -0.34339977 | 0.173 | 0.346 | 1 |
| Arhgef17 | 0.018533864 | 0.365677322 | 0.373 | 0.21 | 1 |
| Gm9843 | 0.01883938 | 0.572584924 | 0.52 | 0.37 | 1 |
| Slc6a17 | 0.018940136 | -0.304558761 | 0.08 | 0.21 | 1 |
| Tjap1 | 0.019080728 | -0.303809246 | 0.04 | 0.148 | 1 |
| Wdr76 | 0.019111327 | -0.300081117 | 0.053 | 0.173 | 1 |
| Cmtm4 | 0.019278728 | 0.492902381 | 0.6 | 0.444 | 1 |
| Sncg | 0.019395236 | 0.299268138 | 0.2 | 0.074 | 1 |
| Hspa2 | 0.01943722 | 0.366655117 | 0.373 | 0.21 | 1 |
| Vezf1 | 0.019460826 | 0.358127345 | 0.347 | 0.173 | 1 |
| Myo10 | 0.019533422 | 0.492784255 | 0.573 | 0.444 | 1 |
| Dnaic2 | 0.019602177 | 0.291871054 | 0.453 | 0.247 | 1 |
| 4930444P10Rik | 0.019663503 | 0.474355469 | 0.28 | 0.136 | 1 |
| Dbi | 0.019774601 | 0.456827925 | 0.907 | 0.802 | 1 |
| Smim5 | 0.019816313 | 0.280381071 | 0.293 | 0.136 | 1 |
| 4833420G17Rik | 0.019855714 | -0.521813659 | 0.2 | 0.346 | 1 |
| Slc43a2 | 0.019866269 | 0.263574899 | 0.28 | 0.123 | 1 |
| Gabpa | 0.019931312 | 0.253214845 | 0.227 | 0.086 | 1 |
| Sncaip | 0.020022067 | 0.414011918 | 0.747 | 0.63 | 1 |
| Rab3gap2 | 0.020028233 | -0.295257995 | 0.147 | 0.309 | 1 |
| Dnajc27 | 0.020099474 | 0.387574355 | 0.24 | 0.111 | 1 |
| Gm2163 | 0.020139757 | -0.479628968 | 0.213 | 0.358 | 1 |
| Sh3glb2 | 0.020171325 | -0.306990962 | 0.04 | 0.148 | 1 |
| Gm39317 | 0.020295701 | 0.292968885 | 0.16 | 0.049 | 1 |
| Anks3 | 0.020307437 | -0.413080279 | 0.12 | 0.259 | 1 |
| Pcsk2 | 0.020372463 | -0.671695096 | 0.333 | 0.481 | 1 |
| Zwint | 0.020397274 | -0.496085101 | 0.387 | 0.506 | 1 |
| Gstm1 | 0.020413561 | 0.411693733 | 0.56 | 0.37 | 1 |
| Rassf4 | 0.020511236 | 0.320104455 | 0.253 | 0.111 | 1 |
| Cntln | 0.020575466 | 0.352915643 | 0.627 | 0.444 | 1 |
| Tanc2 | 0.02060469 | -0.385120785 | 0.613 | 0.716 | 1 |
| Atxn7l1 | 0.020676957 | 0.391339025 | 0.747 | 0.617 | 1 |
| Cmip | 0.020678087 | 0.440701539 | 0.613 | 0.457 | 1 |
| Rap1a | 0.020779634 | 0.351680737 | 0.48 | 0.309 | 1 |
| Syt9 | 0.020799075 | 0.317666701 | 0.387 | 0.222 | 1 |
| Tceal9 | 0.02081171 | -0.295017567 | 0.053 | 0.173 | 1 |
| Glp2r | 0.02086322 | -0.277242638 | 0.107 | 0.259 | 1 |
| Nrxn2 | 0.020962247 | -0.506412941 | 0.253 | 0.407 | 1 |
| Otof | 0.021034633 | 0.305740365 | 0.16 | 0.049 | 1 |
| Dlg2 | 0.021157828 | -0.982466823 | 0.787 | 0.852 | 1 |
| Etf1 | 0.021303086 | 0.454661842 | 0.267 | 0.123 | 1 |
| Slc8a3 | 0.021315924 | -0.262248689 | 0.04 | 0.148 | 1 |
| Gbe1 | 0.021329515 | 0.293476233 | 0.32 | 0.16 | 1 |
| Rfesd | 0.021490391 | -0.322514628 | 0.027 | 0.123 | 1 |
| Pou2f1 | 0.021493394 | 0.403076453 | 0.653 | 0.494 | 1 |
| H2afy | 0.021588636 | 0.407833603 | 0.36 | 0.198 | 1 |
| Ezh1 | 0.021676338 | 0.263009427 | 0.2 | 0.074 | 1 |
| Bag6 | 0.021796897 | 0.270759598 | 0.16 | 0.049 | 1 |
| Gm45846 | 0.021818175 | 0.386705789 | 0.547 | 0.37 | 1 |
| Ctnnd2 | 0.021869405 | -0.337871133 | 0.893 | 0.901 | 1 |
| Nin | 0.021947735 | 0.427068158 | 0.8 | 0.691 | 1 |
| Gng7 | 0.022022783 | -0.393516738 | 0.133 | 0.272 | 1 |
| Klhl26 | 0.022134454 | 0.261901851 | 0.347 | 0.173 | 1 |
| Utp3 | 0.022186965 | 0.257686966 | 0.16 | 0.049 | 1 |
| Rpl7l1 | 0.022186965 | 0.267421663 | 0.16 | 0.049 | 1 |
| Pld3 | 0.022263014 | -0.425545533 | 0.173 | 0.321 | 1 |
| Tmcc3 | 0.022347345 | 0.293302271 | 0.907 | 0.802 | 1 |
| Zer1 | 0.022353067 | -0.511273792 | 0.12 | 0.247 | 1 |
| Khdrbs2 | 0.022404577 | -0.765660171 | 0.08 | 0.21 | 1 |
| Scn4b | 0.022481846 | -0.298547593 | 0.227 | 0.407 | 1 |
| Aldoc | 0.022492787 | 0.334565998 | 0.267 | 0.123 | 1 |
| Plet1 | 0.022745273 | 0.361509468 | 0.213 | 0.086 | 1 |
| Tbc1d22b | 0.022786048 | -0.40450683 | 0.187 | 0.333 | 1 |
| Ckb | 0.022788391 | 0.423598765 | 0.813 | 0.679 | 1 |
| Uba1 | 0.0228425 | 0.282570802 | 0.24 | 0.099 | 1 |
| Cnot10 | 0.022857331 | 0.279827838 | 0.587 | 0.407 | 1 |
| Dtd1 | 0.022908733 | 0.359122028 | 0.373 | 0.21 | 1 |
| Zfp280d | 0.022969791 | -0.422026396 | 0.587 | 0.654 | 1 |
| Mpdz | 0.023024173 | 0.360455463 | 0.853 | 0.716 | 1 |
| Saxo2 | 0.023072501 | 0.335494364 | 0.653 | 0.481 | 1 |
| Gabrg2 | 0.023131944 | -0.35279918 | 0.08 | 0.198 | 1 |
| Vgll4 | 0.023161708 | 0.43538995 | 0.627 | 0.444 | 1 |
| Camk1d | 0.02316344 | 0.432102658 | 0.907 | 0.84 | 1 |
| Gabrb2 | 0.023188138 | -0.395633515 | 0.12 | 0.272 | 1 |
| 1810013L24Rik | 0.023208366 | 0.428770233 | 0.453 | 0.296 | 1 |
| Ift22 | 0.023208511 | 0.285910874 | 0.467 | 0.284 | 1 |
| Cdk5r2 | 0.023295805 | -0.338807147 | 0.027 | 0.123 | 1 |
| Bbox1 | 0.023348413 | 0.279192525 | 0.84 | 0.728 | 1 |
| Ccdc88c | 0.023371516 | 0.400285016 | 0.787 | 0.654 | 1 |
| Rps3 | 0.023498638 | 0.326195135 | 0.293 | 0.136 | 1 |
| Rgs4 | 0.023550134 | -0.339651808 | 0.187 | 0.346 | 1 |
| Zfp938 | 0.023609258 | 0.294243758 | 0.173 | 0.062 | 1 |
| Fam84b | 0.023618418 | 0.286186159 | 0.307 | 0.148 | 1 |
| Appl2 | 0.023719069 | 0.397931978 | 0.373 | 0.21 | 1 |
| Plekha1 | 0.023739826 | 0.255354302 | 0.267 | 0.123 | 1 |
| 9030624J02Rik | 0.023801666 | 0.359835232 | 0.333 | 0.185 | 1 |
| Smim10l1 | 0.023934566 | 0.367261018 | 0.253 | 0.123 | 1 |
| Psma5 | 0.02415346 | -0.255700818 | 0.08 | 0.21 | 1 |
| Cops2 | 0.024191269 | -0.429849105 | 0.24 | 0.383 | 1 |
| Tmem50a | 0.024292019 | 0.348709841 | 0.36 | 0.198 | 1 |
| Arhgap6 | 0.024522035 | 0.452461853 | 0.8 | 0.778 | 1 |
| Ptma | 0.024602935 | 0.495892438 | 0.76 | 0.667 | 1 |
| Arhgap20 | 0.024631437 | -0.25826975 | 0.067 | 0.185 | 1 |
| Gm15489 | 0.024676306 | 0.493600095 | 0.493 | 0.346 | 1 |
| Ppm1f | 0.024714059 | 0.37587795 | 0.267 | 0.123 | 1 |
| Psat1 | 0.024714059 | 0.351782381 | 0.267 | 0.123 | 1 |
| 4930578M01Rik | 0.024814778 | 0.444813035 | 0.6 | 0.457 | 1 |
| Mtus1 | 0.024873999 | 0.262408808 | 0.547 | 0.346 | 1 |
| Unc5cl | 0.02490049 | 0.358416441 | 0.867 | 0.926 | 1 |
| Ndufaf5 | 0.024920656 | -0.322967623 | 0.053 | 0.16 | 1 |
| Odf2 | 0.024921826 | 0.37065351 | 0.707 | 0.605 | 1 |
| Slc6a19 | 0.02523061 | 0.323153728 | 0.173 | 0.062 | 1 |
| Pih1h3b | 0.025300573 | 0.416824854 | 0.413 | 0.259 | 1 |
| D8Ertd738e | 0.025338636 | 0.259945734 | 0.2 | 0.074 | 1 |
| Coq10a | 0.025428162 | 0.284607198 | 0.133 | 0.037 | 1 |
| Zfp330 | 0.025428162 | 0.305109885 | 0.133 | 0.037 | 1 |
| Nt5c2 | 0.025447234 | -0.423930246 | 0.613 | 0.704 | 1 |
| Dmtf1 | 0.025448445 | -0.25451675 | 0.2 | 0.358 | 1 |
| Fam120b | 0.025581418 | 0.381531538 | 0.627 | 0.469 | 1 |
| Ppp2r5c | 0.025660339 | 0.290966841 | 0.693 | 0.519 | 1 |
| Riiad1 | 0.025660464 | 0.422772081 | 0.68 | 0.531 | 1 |
| Col5a3 | 0.025668676 | 0.263138115 | 0.347 | 0.185 | 1 |
| Paqr7 | 0.025697413 | -0.342256318 | 0.16 | 0.309 | 1 |
| Neto2 | 0.025697413 | -0.368181051 | 0.16 | 0.309 | 1 |
| Cpd | 0.025903488 | 0.310341408 | 0.68 | 0.519 | 1 |
| Arhgap18 | 0.026095631 | 0.396554865 | 0.72 | 0.617 | 1 |
| Baiap2 | 0.026150843 | 0.477071958 | 0.587 | 0.42 | 1 |
| Lrrc58 | 0.02615285 | 0.314480607 | 0.493 | 0.333 | 1 |
| Pcx | 0.026301017 | -0.481922997 | 0.213 | 0.358 | 1 |
| Avl9 | 0.026303798 | 0.332748445 | 0.387 | 0.235 | 1 |
| Zfp74 | 0.02663193 | 0.382399192 | 0.24 | 0.111 | 1 |
| Acss3 | 0.026748961 | 0.369065105 | 0.653 | 0.519 | 1 |
| Als2cr12 | 0.026860718 | 0.254622007 | 0.333 | 0.16 | 1 |
| Ylpm1 | 0.026899673 | -0.444287128 | 0.507 | 0.617 | 1 |
| Rsrp1 | 0.026950076 | 0.315524881 | 0.84 | 0.642 | 1 |
| Pus10 | 0.027345839 | 0.284013472 | 0.333 | 0.173 | 1 |
| Rnf141 | 0.027514125 | -0.410720405 | 0.133 | 0.259 | 1 |
| C130073E24Rik | 0.027574595 | -0.321094662 | 0.053 | 0.16 | 1 |
| Gabra2 | 0.027577416 | -0.599462882 | 0.213 | 0.346 | 1 |
| Raph1 | 0.027846241 | -0.359465794 | 0.093 | 0.222 | 1 |
| Ppp1r16b | 0.027846241 | -0.28790915 | 0.093 | 0.222 | 1 |
| Gm45783 | 0.027932692 | -0.641775059 | 0.253 | 0.42 | 1 |
| Ankrd40 | 0.02800507 | 0.25014409 | 0.333 | 0.173 | 1 |
| Mybl2 | 0.028008874 | 0.390938168 | 0.213 | 0.086 | 1 |
| Clic1 | 0.028086758 | 0.376237357 | 0.307 | 0.16 | 1 |
| Cdkl4 | 0.028123726 | 0.26576683 | 0.787 | 0.654 | 1 |
| Nmnat3 | 0.028138668 | 0.250187946 | 0.24 | 0.111 | 1 |
| Letm1 | 0.028243202 | 0.295822443 | 0.227 | 0.099 | 1 |
| Ndst1 | 0.028258931 | 0.348003949 | 0.307 | 0.16 | 1 |
| Glt8d1 | 0.028283738 | 0.334436702 | 0.507 | 0.358 | 1 |
| Gm553 | 0.028300432 | 0.377035463 | 0.173 | 0.062 | 1 |
| Cnpy3 | 0.028300432 | 0.347923204 | 0.173 | 0.062 | 1 |
| Gm1110 | 0.028383791 | 0.338066663 | 0.28 | 0.136 | 1 |
| Rpa1 | 0.028400341 | 0.372932187 | 0.347 | 0.198 | 1 |
| Mavs | 0.02851182 | -0.35964958 | 0.053 | 0.16 | 1 |
| Rhobtb2 | 0.02851182 | -0.253535444 | 0.053 | 0.16 | 1 |
| Srsf1 | 0.028531983 | 0.400664449 | 0.547 | 0.395 | 1 |
| Kcnn4 | 0.028587816 | 0.377515803 | 0.187 | 0.074 | 1 |
| Zzef1 | 0.028674676 | -0.520522738 | 0.253 | 0.383 | 1 |
| Itsn2 | 0.028740239 | -0.452978154 | 0.427 | 0.543 | 1 |
| Asah2 | 0.028775971 | 0.278833707 | 0.267 | 0.123 | 1 |
| Smarca5 | 0.028843342 | 0.437330941 | 0.427 | 0.259 | 1 |
| Aqp4 | 0.028903721 | 0.311187859 | 0.787 | 0.654 | 1 |
| Gm20388 | 0.028981809 | -0.327309242 | 0.84 | 0.901 | 1 |
| Klhdc7a | 0.029021807 | 0.295227087 | 0.32 | 0.16 | 1 |
| Swi5 | 0.029063309 | 0.284165901 | 0.347 | 0.198 | 1 |
| St8sia2 | 0.02910421 | 0.308668759 | 0.733 | 0.593 | 1 |
| Fam208b | 0.029190965 | -0.406580628 | 0.2 | 0.358 | 1 |
| Mamdc2 | 0.029233082 | -0.652508701 | 0.493 | 0.593 | 1 |
| Cachd1 | 0.029399953 | -0.381454003 | 0.853 | 0.901 | 1 |
| Wrn | 0.029558607 | 0.284636256 | 0.787 | 0.667 | 1 |
| Srsf11 | 0.029872459 | 0.278356168 | 0.587 | 0.395 | 1 |
| Lrrc10b | 0.030088685 | 0.261579622 | 0.32 | 0.16 | 1 |
| Ddx58 | 0.030140866 | 0.265392047 | 0.133 | 0.037 | 1 |
| Egln1 | 0.030168639 | 0.41921959 | 0.333 | 0.185 | 1 |
| Sacs | 0.030216559 | 0.351856815 | 0.307 | 0.16 | 1 |
| Nox4 | 0.030532591 | 0.341438564 | 0.253 | 0.111 | 1 |
| Ccdc65 | 0.030799503 | 0.402804267 | 0.36 | 0.222 | 1 |
| Atp5a1 | 0.030829263 | 0.318123067 | 0.493 | 0.346 | 1 |
| Scfd2 | 0.030861033 | -0.585262488 | 0.12 | 0.247 | 1 |
| Trim12c | 0.030881799 | 0.304038772 | 0.187 | 0.074 | 1 |
| Atf1 | 0.031563494 | 0.425904422 | 0.307 | 0.173 | 1 |
| Errfi1 | 0.031572886 | 0.267704822 | 0.147 | 0.049 | 1 |
| Fbxo28 | 0.031617925 | -0.267858407 | 0.133 | 0.272 | 1 |
| Slc35b4 | 0.031686806 | 0.266687978 | 0.173 | 0.062 | 1 |
| Numb | 0.031725379 | -0.319111021 | 0.467 | 0.605 | 1 |
| Cald1 | 0.031897305 | 0.34459609 | 0.84 | 0.716 | 1 |
| Plec | 0.032175042 | 0.38294934 | 0.493 | 0.37 | 1 |
| Pag1 | 0.032184612 | -0.334528208 | 0.2 | 0.346 | 1 |
| Gm37381 | 0.032465337 | 0.300161202 | 0.133 | 0.037 | 1 |
| Cntrl | 0.032636826 | 0.259156045 | 0.8 | 0.654 | 1 |
| Plagl1 | 0.032732425 | 0.309045381 | 0.36 | 0.198 | 1 |
| Tpt1 | 0.032768212 | 0.368956137 | 0.387 | 0.235 | 1 |
| Ywhae | 0.033000081 | 0.323218114 | 0.827 | 0.667 | 1 |
| Agpat4 | 0.033006742 | 0.409229905 | 0.707 | 0.58 | 1 |
| Por | 0.033048086 | 0.395689473 | 0.413 | 0.247 | 1 |
| Slc25a12 | 0.033131984 | 0.427963441 | 0.707 | 0.556 | 1 |
| Evl | 0.033139507 | -0.497641299 | 0.2 | 0.333 | 1 |
| Mettl16 | 0.033257366 | 0.357313245 | 0.413 | 0.259 | 1 |
| Fgfr1op | 0.033295719 | 0.29125463 | 0.467 | 0.296 | 1 |
| Klf12 | 0.033357629 | 0.373434621 | 0.773 | 0.605 | 1 |
| Slc30a5 | 0.033396064 | 0.279972784 | 0.293 | 0.16 | 1 |
| Skp1a | 0.033469352 | 0.333964259 | 0.32 | 0.173 | 1 |
| Rit2 | 0.033554569 | -0.470562518 | 0.627 | 0.704 | 1 |
| Bace2 | 0.033613449 | 0.503995599 | 0.64 | 0.481 | 1 |
| Pink1 | 0.033664817 | 0.271448896 | 0.4 | 0.222 | 1 |
| Elmo1 | 0.033694268 | -0.371609899 | 0.227 | 0.37 | 1 |
| Nkd2 | 0.033863981 | 0.327040438 | 0.227 | 0.099 | 1 |
| CT025548.2 | 0.033982535 | 0.283915402 | 0.707 | 0.568 | 1 |
| Rps15 | 0.034027805 | 0.418508898 | 0.36 | 0.222 | 1 |
| Celf3 | 0.034183897 | -0.284133654 | 0.027 | 0.111 | 1 |
| Gabrg3 | 0.0343321 | -0.568965084 | 0.693 | 0.864 | 1 |
| Arhgef1 | 0.034357733 | 0.306105457 | 0.187 | 0.074 | 1 |
| Stxbp1 | 0.034403753 | -0.444546778 | 0.227 | 0.346 | 1 |
| Slc31a1 | 0.034421184 | 0.308754397 | 0.147 | 0.049 | 1 |
| Cdadc1 | 0.034435096 | 0.367788595 | 0.373 | 0.222 | 1 |
| Nek11 | 0.034649991 | 0.352932175 | 0.893 | 0.765 | 1 |
| Adgra1 | 0.034702356 | -0.424943158 | 0.12 | 0.247 | 1 |
| Ccng1 | 0.034922525 | 0.268788196 | 0.24 | 0.111 | 1 |
| 4930567H12Rik | 0.034946373 | 0.352831401 | 0.453 | 0.284 | 1 |
| Tmem232 | 0.035054885 | 0.321584681 | 0.853 | 0.79 | 1 |
| Mt3 | 0.035133576 | 0.384783391 | 0.613 | 0.494 | 1 |
| Nemp1 | 0.03529792 | -0.319738003 | 0.2 | 0.358 | 1 |
| Sh3rf1 | 0.03529792 | -0.278965662 | 0.2 | 0.358 | 1 |
| Rps6ka2 | 0.035317667 | 0.367126314 | 0.573 | 0.42 | 1 |
| Malt1 | 0.035355652 | -0.387907222 | 0.067 | 0.173 | 1 |
| Aatf | 0.035552959 | 0.397448975 | 0.36 | 0.222 | 1 |
| Zcchc7 | 0.035802415 | -0.324365013 | 0.733 | 0.84 | 1 |
| Efcab6 | 0.035806264 | 0.425987058 | 0.653 | 0.531 | 1 |
| Rogdi | 0.035831952 | 0.329571807 | 0.213 | 0.099 | 1 |
| Recql | 0.036058812 | -0.257111511 | 0.04 | 0.136 | 1 |
| Lrif1 | 0.036093319 | 0.355125756 | 0.4 | 0.247 | 1 |
| Cacna1b | 0.0361068 | -0.435018527 | 0.107 | 0.222 | 1 |
| March10 | 0.036294466 | 0.381503373 | 0.48 | 0.333 | 1 |
| Fbxo34 | 0.03632315 | -0.468744092 | 0.16 | 0.284 | 1 |
| Bhlhe41 | 0.036474947 | 0.418493937 | 0.4 | 0.247 | 1 |
| Kcnq5 | 0.03666559 | -0.705490292 | 0.813 | 0.877 | 1 |
| Capsl | 0.036759614 | 0.265542432 | 0.453 | 0.284 | 1 |
| Vim | 0.03678101 | 0.372341056 | 0.533 | 0.383 | 1 |
| Cdkl1 | 0.036879031 | 0.355266773 | 0.28 | 0.16 | 1 |
| A230057D06Rik.2 | 0.036956882 | -0.44699643 | 0.12 | 0.235 | 1 |
| Tspan7 | 0.036980974 | -0.475158919 | 0.413 | 0.556 | 1 |
| Dst | 0.036990865 | 0.33795685 | 0.973 | 0.914 | 1 |
| Tnks | 0.037060382 | 0.298270309 | 0.68 | 0.543 | 1 |
| Ctnna1 | 0.037133793 | 0.267508589 | 0.72 | 0.531 | 1 |
| Exoc5 | 0.037290037 | -0.384088651 | 0.253 | 0.395 | 1 |
| Fth1 | 0.037319671 | 0.325471609 | 0.827 | 0.765 | 1 |
| Atf2 | 0.037341254 | -0.416765632 | 0.347 | 0.481 | 1 |
| Tmem131l | 0.03747142 | -0.273579026 | 0.173 | 0.321 | 1 |
| Mxd4 | 0.037484186 | 0.295711736 | 0.253 | 0.123 | 1 |
| Lrp10 | 0.037658799 | 0.308720138 | 0.307 | 0.173 | 1 |
| Spag8 | 0.037678063 | 0.368684286 | 0.293 | 0.173 | 1 |
| Ablim1 | 0.037751141 | 0.257080925 | 0.933 | 0.889 | 1 |
| Efcab2 | 0.037795702 | 0.412924307 | 0.64 | 0.469 | 1 |
| Gabbr1 | 0.037886448 | -0.313377458 | 0.413 | 0.58 | 1 |
| Fus | 0.038197408 | -0.261161453 | 0.8 | 0.864 | 1 |
| Gm29865 | 0.038659482 | 0.29025238 | 0.107 | 0.025 | 1 |
| Ttl | 0.038968047 | 0.257495766 | 0.347 | 0.198 | 1 |
| Hspd1 | 0.038975803 | 0.330489586 | 0.387 | 0.247 | 1 |
| Drd1 | 0.039030332 | -0.441987836 | 0.187 | 0.321 | 1 |
| Fkbp9 | 0.039238906 | 0.310269618 | 0.333 | 0.198 | 1 |
| Dcun1d2 | 0.039341993 | -0.274180681 | 0.093 | 0.222 | 1 |
| Thoc7 | 0.03962511 | 0.389013554 | 0.28 | 0.16 | 1 |
| Ubn2 | 0.039655648 | -0.316115801 | 0.733 | 0.827 | 1 |
| Gm17276 | 0.039667659 | -0.360430758 | 0.373 | 0.531 | 1 |
| Rabl2 | 0.039893317 | 0.415736437 | 0.48 | 0.346 | 1 |
| Sycp3 | 0.039945833 | -0.408720562 | 0.067 | 0.173 | 1 |
| Frmd8 | 0.040102656 | 0.261479711 | 0.147 | 0.049 | 1 |
| Gnai2 | 0.040175292 | 0.347989064 | 0.48 | 0.309 | 1 |
| Cep85l | 0.040420538 | -0.276176225 | 0.227 | 0.37 | 1 |
| Kcnd2 | 0.040694738 | -0.841137072 | 0.787 | 0.802 | 1 |
| Vwa3b | 0.04070562 | 0.312935082 | 0.72 | 0.667 | 1 |
| Ssb | 0.040819217 | -0.282942755 | 0.293 | 0.469 | 1 |
| Prdm2 | 0.041060695 | 0.29244855 | 0.48 | 0.346 | 1 |
| Dglucy | 0.041116102 | 0.35439938 | 0.36 | 0.21 | 1 |
| Nrbp2 | 0.041425595 | 0.462759303 | 0.76 | 0.642 | 1 |
| Slc35a2 | 0.041515639 | 0.268792608 | 0.227 | 0.111 | 1 |
| Apbb1 | 0.041670392 | -0.304657812 | 0.08 | 0.198 | 1 |
| Lztfl1 | 0.041831538 | 0.282307105 | 0.64 | 0.494 | 1 |
| Ube2l3 | 0.041851024 | 0.341018963 | 0.333 | 0.21 | 1 |
| Cacna2d3 | 0.04194918 | -0.673992897 | 0.4 | 0.531 | 1 |
| Entpd1 | 0.042247735 | 0.397556777 | 0.267 | 0.136 | 1 |
| Mt1 | 0.042437818 | 0.497229026 | 0.707 | 0.642 | 1 |
| Srpk2 | 0.042469911 | -0.40584116 | 0.64 | 0.716 | 1 |
| Uty | 0.042541212 | -0.452377961 | 0.493 | 0.617 | 1 |
| Tnik | 0.042677048 | -0.481345361 | 0.493 | 0.605 | 1 |
| St6gal1 | 0.04274114 | 0.325399918 | 0.853 | 0.753 | 1 |
| Jund | 0.042928584 | 0.29938519 | 0.56 | 0.383 | 1 |
| Psmd7 | 0.043046349 | 0.323163034 | 0.28 | 0.16 | 1 |
| Diaph3 | 0.043216287 | -0.376742215 | 0.28 | 0.42 | 1 |
| Nacc2 | 0.043415396 | 0.412679655 | 0.467 | 0.321 | 1 |
| Prrc2c | 0.043419385 | -0.341614733 | 0.653 | 0.716 | 1 |
| Got2 | 0.043620031 | -0.257653084 | 0.12 | 0.247 | 1 |
| Cavin1 | 0.043770447 | 0.30170152 | 0.2 | 0.086 | 1 |
| A430073D23Rik | 0.043863066 | -0.307822111 | 0.267 | 0.407 | 1 |
| Cdkl3 | 0.04397924 | 0.544553309 | 0.587 | 0.481 | 1 |
| Tctex1d4 | 0.044155527 | 0.256789478 | 0.64 | 0.457 | 1 |
| Nmt2 | 0.044301924 | 0.272190645 | 0.44 | 0.272 | 1 |
| Sox9 | 0.044505784 | 0.403538723 | 0.653 | 0.543 | 1 |
| Gm42560 | 0.044537874 | -0.380640207 | 0.08 | 0.185 | 1 |
| Ash1l | 0.044565078 | 0.251428827 | 0.893 | 0.778 | 1 |
| Fam103a1 | 0.044612798 | -0.317920193 | 0.107 | 0.222 | 1 |
| Slc26a3 | 0.044782172 | 0.360882751 | 0.333 | 0.198 | 1 |
| Fam219a | 0.044975129 | -0.271954567 | 0.253 | 0.42 | 1 |
| Prkcb | 0.04498946 | -0.565471251 | 0.347 | 0.481 | 1 |
| Chid1 | 0.04503196 | -0.262569913 | 0.067 | 0.173 | 1 |
| Stxbp4 | 0.045108899 | 0.406064424 | 0.747 | 0.617 | 1 |
| Psma3 | 0.045272858 | 0.33393575 | 0.4 | 0.272 | 1 |
| Elp2 | 0.045827563 | -0.356115082 | 0.147 | 0.272 | 1 |
| Caps2 | 0.045866445 | 0.298032239 | 0.32 | 0.185 | 1 |
| Tob1 | 0.045881618 | 0.347653916 | 0.413 | 0.272 | 1 |
| Mob3b | 0.046016494 | 0.331217123 | 0.88 | 0.877 | 1 |
| Hmgxb4 | 0.046211552 | -0.382219274 | 0.12 | 0.235 | 1 |
| Aph1a | 0.046212273 | 0.33732203 | 0.16 | 0.062 | 1 |
| Esf1 | 0.046268679 | -0.338361271 | 0.173 | 0.296 | 1 |
| Tnpo2 | 0.046382815 | -0.289396384 | 0.107 | 0.222 | 1 |
| Rpap3 | 0.046385586 | 0.350584077 | 0.173 | 0.074 | 1 |
| Qtrt2 | 0.046387715 | -0.441647681 | 0.2 | 0.333 | 1 |
| Cp | 0.046402169 | 0.28363592 | 0.387 | 0.235 | 1 |
| Pbxip1 | 0.046682956 | 0.323959267 | 0.573 | 0.444 | 1 |
| Cbwd1 | 0.047053558 | -0.403247407 | 0.147 | 0.259 | 1 |
| Lrpap1 | 0.047089064 | 0.289729833 | 0.24 | 0.111 | 1 |
| Nrcam | 0.047204154 | -0.42945259 | 0.32 | 0.469 | 1 |
| Gnao1 | 0.047499754 | -0.350360559 | 0.64 | 0.728 | 1 |
| Taf1c | 0.047586142 | 0.330775422 | 0.307 | 0.173 | 1 |
| Mast4 | 0.047792999 | 0.250631878 | 0.867 | 0.753 | 1 |
| Ntn1 | 0.047914177 | -0.529771276 | 0.253 | 0.383 | 1 |
| Rps20 | 0.048467162 | 0.256343635 | 0.267 | 0.148 | 1 |
| Parp16 | 0.048480148 | 0.338969078 | 0.173 | 0.074 | 1 |
| Klhl22 | 0.048834479 | -0.276431301 | 0.107 | 0.222 | 1 |
| Tmem132a | 0.048834479 | -0.293031686 | 0.107 | 0.222 | 1 |
| Dnajc19 | 0.048839894 | -0.332028239 | 0.133 | 0.259 | 1 |
| Arv1 | 0.048935647 | 0.327429973 | 0.307 | 0.173 | 1 |
| Nup98 | 0.049020702 | -0.322318213 | 0.32 | 0.469 | 1 |
| Mast2 | 0.049021409 | -0.481083137 | 0.307 | 0.457 | 1 |
| Ankrd12 | 0.049264932 | 0.272197449 | 0.813 | 0.691 | 1 |
| Zfp654 | 0.049484241 | -0.436820907 | 0.173 | 0.296 | 1 |
| Zhx2 | 0.049511334 | 0.385990084 | 0.747 | 0.691 | 1 |
| March1 | 0.049742012 | -0.504861813 | 0.187 | 0.321 | 1 |
| Ttc9 | 0.049750745 | 0.289938431 | 0.573 | 0.42 | 1 |
| Peak1 | 0.049762914 | 0.258020373 | 0.6 | 0.444 | 1 |
| Zfp423 | 0.049972573 | 0.277744716 | 0.84 | 0.716 | 1 |
| Lrrc19 | 0.050018482 | -0.362100692 | 0.133 | 0.259 | 1 |
| Armc3 | 0.050039528 | 0.389893308 | 0.853 | 0.765 | 1 |
| Dlgap4 | 0.05018557 | -0.42817834 | 0.333 | 0.457 | 1 |
| Igbp1 | 0.050743834 | -0.261096334 | 0.107 | 0.222 | 1 |
| Tcte1 | 0.050753771 | 0.301538501 | 0.52 | 0.346 | 1 |
| Dctn4 | 0.050798658 | 0.271732129 | 0.493 | 0.296 | 1 |
| Rhobtb1 | 0.050822147 | 0.440069687 | 0.627 | 0.469 | 1 |
| Phf12 | 0.050956818 | 0.331120613 | 0.533 | 0.395 | 1 |
| Itgb1 | 0.05103005 | 0.420222428 | 0.36 | 0.222 | 1 |
| Ttc21a | 0.051151647 | 0.362907167 | 0.787 | 0.716 | 1 |
| Spry2 | 0.051271359 | -0.311367174 | 0.08 | 0.185 | 1 |
| Slc7a7 | 0.051565385 | 0.254644924 | 0.253 | 0.136 | 1 |
| Pcp4l1 | 0.051852915 | 0.347879556 | 0.627 | 0.531 | 1 |
| Dnajb1 | 0.052103625 | 0.270475197 | 0.12 | 0.037 | 1 |
| Tacc2 | 0.052190782 | 0.355090288 | 0.8 | 0.741 | 1 |
| Grm3 | 0.052211509 | -0.696667902 | 0.173 | 0.284 | 1 |
| Mark3 | 0.052245636 | -0.357332042 | 0.547 | 0.704 | 1 |
| Mat2a | 0.052262224 | -0.369006377 | 0.4 | 0.506 | 1 |
| Hsp90aa1 | 0.052316738 | -0.353086598 | 0.64 | 0.716 | 1 |
| March4 | 0.05247636 | 0.286807973 | 0.667 | 0.519 | 1 |
| Dse | 0.052521963 | -0.308527886 | 0.04 | 0.123 | 1 |
| Gm29571 | 0.05276934 | -0.509819125 | 0.48 | 0.593 | 1 |
| Klf6 | 0.052908043 | 0.253644332 | 0.173 | 0.074 | 1 |
| A230006K03Rik | 0.053339038 | -0.298486147 | 0.093 | 0.21 | 1 |
| Ntrk3 | 0.053346558 | -0.536139516 | 0.293 | 0.42 | 1 |
| Sctr | 0.053543737 | 0.487492362 | 0.44 | 0.309 | 1 |
| Lama2 | 0.053582772 | 0.283209836 | 0.44 | 0.272 | 1 |
| Asic2 | 0.053644523 | -0.604793986 | 0.627 | 0.728 | 1 |
| Prps1 | 0.053688536 | 0.252179201 | 0.213 | 0.099 | 1 |
| Pclaf | 0.053724841 | 0.316098458 | 0.227 | 0.111 | 1 |
| Drc1 | 0.053884089 | -0.348240997 | 0.627 | 0.741 | 1 |
| Daam1 | 0.053960937 | -0.383974062 | 0.467 | 0.58 | 1 |
| Pdlim1 | 0.054000744 | -0.393558321 | 0.093 | 0.198 | 1 |
| Arsb | 0.054181242 | -0.33160249 | 0.36 | 0.519 | 1 |
| Chordc1 | 0.054228137 | -0.301469987 | 0.307 | 0.444 | 1 |
| Gm3294 | 0.05435109 | 0.281819606 | 0.547 | 0.407 | 1 |
| Hdgfl2 | 0.054531436 | 0.367136968 | 0.28 | 0.16 | 1 |
| Abi1 | 0.054796502 | -0.419862695 | 0.413 | 0.519 | 1 |
| Ldlrad3 | 0.055055784 | 0.422326154 | 0.693 | 0.58 | 1 |
| Sdf4 | 0.055068919 | 0.379737964 | 0.373 | 0.235 | 1 |
| Endog | 0.055162195 | 0.289356154 | 0.493 | 0.333 | 1 |
| Zdhhc9 | 0.055284916 | -0.265071663 | 0.04 | 0.123 | 1 |
| Atp2b4 | 0.05528677 | 0.279406481 | 0.693 | 0.58 | 1 |
| Sntg1 | 0.055395788 | -0.61583841 | 0.307 | 0.42 | 1 |
| Slc38a9 | 0.055632386 | -0.322398192 | 0.28 | 0.407 | 1 |
| Prtn3 | 0.056043875 | 0.259882372 | 0.173 | 0.074 | 1 |
| Prodh | 0.05605219 | -0.311740602 | 0.107 | 0.21 | 1 |
| Tdrd3 | 0.05609975 | -0.334545543 | 0.467 | 0.58 | 1 |
| Gm12353 | 0.05636337 | -0.347108254 | 0.32 | 0.469 | 1 |
| Brwd3 | 0.056415637 | -0.29949684 | 0.2 | 0.333 | 1 |
| Rpl10a | 0.056475598 | 0.285800495 | 0.187 | 0.086 | 1 |
| Abcc4 | 0.056599955 | 0.387658086 | 0.507 | 0.358 | 1 |
| Ccbe1 | 0.056692122 | 0.278668216 | 0.733 | 0.58 | 1 |
| March7 | 0.056771879 | 0.26312311 | 0.573 | 0.42 | 1 |
| Ndufaf2 | 0.056812093 | 0.360685719 | 0.573 | 0.457 | 1 |
| Slc25a3 | 0.056919986 | 0.39525872 | 0.52 | 0.37 | 1 |
| Cttnbp2 | 0.05695291 | -0.488368624 | 0.347 | 0.469 | 1 |
| Kcnq3 | 0.05702755 | -0.624816985 | 0.387 | 0.481 | 1 |
| Cd99l2 | 0.057097689 | 0.299985673 | 0.307 | 0.173 | 1 |
| Taf6l | 0.057253776 | 0.331921766 | 0.187 | 0.086 | 1 |
| Pamr1 | 0.058059021 | 0.304532643 | 0.547 | 0.407 | 1 |
| Tnfaip8 | 0.05812943 | 0.444766262 | 0.453 | 0.333 | 1 |
| Stx18 | 0.058461155 | 0.295923711 | 0.507 | 0.383 | 1 |
| Suco | 0.058491721 | 0.285753158 | 0.547 | 0.383 | 1 |
| Srgap3 | 0.058781846 | 0.274518107 | 0.907 | 0.889 | 1 |
| Son | 0.058834364 | 0.275850266 | 0.813 | 0.691 | 1 |
| Ttll3 | 0.058974934 | 0.313265687 | 0.867 | 0.79 | 1 |
| Itm2c | 0.059137631 | 0.282893161 | 0.907 | 0.741 | 1 |
| Dtnbos | 0.059156314 | -0.258988837 | 0.04 | 0.123 | 1 |
| Gm10516 | 0.059278314 | 0.34066879 | 0.293 | 0.173 | 1 |
| Map3k3 | 0.059315184 | -0.297196991 | 0.32 | 0.481 | 1 |
| Coro2b | 0.059426695 | 0.318179368 | 0.707 | 0.58 | 1 |
| Ap5m1 | 0.05950441 | -0.324197446 | 0.16 | 0.284 | 1 |
| Adcy9 | 0.059649722 | -0.262846564 | 0.227 | 0.37 | 1 |
| Myo9a | 0.059652643 | -0.331620865 | 0.507 | 0.63 | 1 |
| Fry | 0.059970047 | -0.441703908 | 0.587 | 0.667 | 1 |
| Stx6 | 0.060075011 | -0.35811787 | 0.147 | 0.259 | 1 |
| Sdk2 | 0.06012091 | 0.403534147 | 0.547 | 0.407 | 1 |
| Slc2a13 | 0.060256048 | -0.57038833 | 0.173 | 0.284 | 1 |
| Nab1 | 0.060584915 | 0.287004418 | 0.293 | 0.173 | 1 |
| Fads1 | 0.060653324 | 0.26571714 | 0.333 | 0.21 | 1 |
| Lamp1 | 0.06092929 | 0.337630821 | 0.493 | 0.346 | 1 |
| Csrp1 | 0.061036669 | 0.278984084 | 0.173 | 0.074 | 1 |
| Ano6 | 0.061217222 | 0.33331856 | 0.76 | 0.63 | 1 |
| Zfp871 | 0.06127971 | -0.307248178 | 0.2 | 0.333 | 1 |
| Dnaja4 | 0.061332994 | 0.338358875 | 0.387 | 0.259 | 1 |
| Syne3 | 0.061359304 | 0.27443643 | 0.133 | 0.049 | 1 |
| Dnajc7 | 0.061367215 | 0.254748391 | 0.573 | 0.42 | 1 |
| Tbl1xr1 | 0.061369342 | -0.359700588 | 0.52 | 0.642 | 1 |
| Rgs12 | 0.061477393 | 0.268092914 | 0.493 | 0.346 | 1 |
| Sptbn1 | 0.061516515 | 0.284670311 | 0.773 | 0.728 | 1 |
| Fcho2 | 0.061667468 | -0.283265439 | 0.613 | 0.667 | 1 |
| Gcn1l1 | 0.061928302 | 0.256210625 | 0.253 | 0.136 | 1 |
| Ppard | 0.062158493 | 0.253615264 | 0.267 | 0.148 | 1 |
| Mpped2 | 0.062158908 | -0.35318376 | 0.147 | 0.259 | 1 |
| Tmtc2 | 0.062693264 | -0.373885593 | 0.213 | 0.346 | 1 |
| Pde7b | 0.062935015 | -0.759327969 | 0.24 | 0.346 | 1 |
| Ptpn20 | 0.06315478 | 0.281476566 | 0.36 | 0.222 | 1 |
| Cd83 | 0.063369731 | 0.252794279 | 0.133 | 0.049 | 1 |
| Lrrcc1 | 0.063690486 | -0.293496045 | 0.187 | 0.309 | 1 |
| Rdh10 | 0.063725875 | 0.394647393 | 0.427 | 0.309 | 1 |
| Hivep2 | 0.064063179 | -0.283702281 | 0.747 | 0.852 | 1 |
| Ucma | 0.064395177 | 0.25520069 | 0.133 | 0.049 | 1 |
| Paqr5 | 0.064666588 | 0.282500969 | 0.187 | 0.086 | 1 |
| St6galnac3 | 0.064834172 | 0.254919485 | 0.84 | 0.765 | 1 |
| Boc | 0.065291585 | 0.370161975 | 0.4 | 0.247 | 1 |
| Slc35f1 | 0.065605615 | -0.477850178 | 0.547 | 0.654 | 1 |
| Foxp2 | 0.065647415 | -0.48602164 | 0.32 | 0.444 | 1 |
| D130040H23Rik | 0.065661285 | -0.351835298 | 0.173 | 0.296 | 1 |
| Mrps14 | 0.065686855 | -0.308057646 | 0.093 | 0.198 | 1 |
| Sult4a1 | 0.066104811 | -0.392357871 | 0.053 | 0.136 | 1 |
| Zfhx4 | 0.066303777 | -0.457233714 | 0.387 | 0.519 | 1 |
| Pds5b | 0.06645707 | -0.349843791 | 0.507 | 0.593 | 1 |
| Cd24a | 0.066642077 | 0.272000913 | 0.6 | 0.481 | 1 |
| Zswim5 | 0.066821686 | -0.386235137 | 0.107 | 0.21 | 1 |
| Huwe1 | 0.066897975 | -0.443321992 | 0.613 | 0.667 | 1 |
| Kat6b | 0.067055517 | -0.465132073 | 0.573 | 0.617 | 1 |
| Syn2 | 0.067186166 | -0.388890033 | 0.347 | 0.481 | 1 |
| Hdac4 | 0.067202849 | 0.325943663 | 0.64 | 0.531 | 1 |
| Gabrb3 | 0.0672521 | -0.411963334 | 0.493 | 0.593 | 1 |
| Ppp1r21 | 0.067480757 | 0.302392775 | 0.293 | 0.173 | 1 |
| Cfap77 | 0.067517924 | -0.349274773 | 0.707 | 0.84 | 1 |
| Rsph3b | 0.067561891 | 0.272948424 | 0.493 | 0.321 | 1 |
| Fam161a | 0.067726091 | -0.355608571 | 0.253 | 0.358 | 1 |
| Hnrnpu | 0.067841917 | 0.266757904 | 0.653 | 0.494 | 1 |
| Ncln | 0.067898577 | 0.354464625 | 0.147 | 0.062 | 1 |
| Cadps | 0.068002577 | -0.566176291 | 0.187 | 0.296 | 1 |
| Zbtb11 | 0.06805372 | -0.449240404 | 0.293 | 0.42 | 1 |
| Cct8 | 0.068140639 | -0.425978463 | 0.12 | 0.222 | 1 |
| Api5 | 0.068149761 | 0.309646305 | 0.307 | 0.198 | 1 |
| Fbxo7 | 0.068416736 | -0.271097422 | 0.067 | 0.16 | 1 |
| Ppp1r1b | 0.068758545 | 0.260671449 | 0.347 | 0.21 | 1 |
| Gtf2e1 | 0.0689202 | 0.278239569 | 0.147 | 0.062 | 1 |
| Fam183b | 0.069175083 | 0.353892458 | 0.253 | 0.148 | 1 |
| Cntnap5b | 0.069392115 | -0.321195751 | 0.067 | 0.16 | 1 |
| Senp6 | 0.069621672 | -0.275515292 | 0.627 | 0.716 | 1 |
| Usp34 | 0.069898401 | -0.253787169 | 0.773 | 0.827 | 1 |
| Pex13 | 0.070317615 | -0.295977967 | 0.147 | 0.259 | 1 |
| Usp6nl | 0.07034512 | 0.280908136 | 0.52 | 0.383 | 1 |
| Wipf1 | 0.070351772 | -0.343416776 | 0.16 | 0.272 | 1 |
| Btbd8 | 0.070373875 | 0.261973853 | 0.56 | 0.42 | 1 |
| Phf14 | 0.070460927 | -0.275129596 | 0.56 | 0.679 | 1 |
| Sgta | 0.071058926 | 0.323285042 | 0.213 | 0.111 | 1 |
| Wnk3 | 0.071540871 | -0.324093285 | 0.173 | 0.284 | 1 |
| Os9 | 0.071618069 | -0.323875246 | 0.253 | 0.37 | 1 |
| Zdhhc1 | 0.071662018 | 0.322730827 | 0.533 | 0.395 | 1 |
| Tes | 0.071777384 | -0.349891612 | 0.2 | 0.321 | 1 |
| Lgmn | 0.072172101 | 0.39256001 | 0.36 | 0.235 | 1 |
| Ncor2 | 0.072252577 | -0.316212809 | 0.267 | 0.383 | 1 |
| Tvp23a | 0.072478023 | -0.263532565 | 0.053 | 0.136 | 1 |
| Slc25a4 | 0.072820403 | 0.252569523 | 0.493 | 0.321 | 1 |
| Trp63 | 0.073003553 | 0.293777744 | 0.413 | 0.259 | 1 |
| Nav1 | 0.073408459 | -0.301378778 | 0.067 | 0.16 | 1 |
| Atcay | 0.07358761 | -0.273421559 | 0.053 | 0.136 | 1 |
| Synj1 | 0.073773679 | -0.332936803 | 0.68 | 0.741 | 1 |
| Otud1 | 0.073825664 | -0.278172039 | 0.093 | 0.185 | 1 |
| Bphl | 0.073874576 | 0.322879916 | 0.6 | 0.481 | 1 |
| Psph | 0.074247535 | -0.425235639 | 0.16 | 0.272 | 1 |
| Rab8b | 0.074668226 | 0.318514934 | 0.24 | 0.136 | 1 |
| Nln | 0.074759965 | 0.261692243 | 0.547 | 0.395 | 1 |
| Ubap2l | 0.075252693 | -0.376558328 | 0.347 | 0.481 | 1 |
| Hnrnph1 | 0.075346071 | -0.473604027 | 0.36 | 0.457 | 1 |
| Pnpla7 | 0.075389811 | 0.254153574 | 0.547 | 0.395 | 1 |
| Fggy | 0.075435602 | 0.31712555 | 0.6 | 0.494 | 1 |
| Ccdc34 | 0.075706082 | 0.32005713 | 0.533 | 0.407 | 1 |
| Ambra1 | 0.075792016 | -0.3579919 | 0.747 | 0.815 | 1 |
| Scap | 0.075854418 | -0.270664728 | 0.16 | 0.272 | 1 |
| Ppp3cc | 0.076000739 | -0.294933096 | 0.387 | 0.519 | 1 |
| Atxn10 | 0.076011238 | -0.338841235 | 0.493 | 0.58 | 1 |
| Catip | 0.076063976 | 0.27479944 | 0.467 | 0.309 | 1 |
| Reps2 | 0.076080883 | -0.39122152 | 0.08 | 0.173 | 1 |
| Xylt1 | 0.076471135 | -0.48821298 | 0.2 | 0.333 | 1 |
| Phldb1 | 0.076714625 | 0.288530548 | 0.573 | 0.42 | 1 |
| Sec24b | 0.077304729 | -0.382424835 | 0.493 | 0.617 | 1 |
| Mtif2 | 0.077358678 | -0.256336702 | 0.107 | 0.21 | 1 |
| Wdsub1 | 0.077752935 | 0.30551184 | 0.32 | 0.21 | 1 |
| Focad | 0.078316479 | -0.379946107 | 0.227 | 0.346 | 1 |
| Cldnd1 | 0.078491503 | 0.304254229 | 0.227 | 0.123 | 1 |
| Suds3 | 0.078660227 | 0.291518437 | 0.253 | 0.136 | 1 |
| Smim13 | 0.078681876 | -0.341903375 | 0.093 | 0.185 | 1 |
| Fhad1 | 0.078854116 | 0.301904003 | 0.813 | 0.79 | 1 |
| Trim39 | 0.079408949 | 0.275604727 | 0.227 | 0.123 | 1 |
| Slc35f3 | 0.079928808 | -0.396274127 | 0.147 | 0.247 | 1 |
| Arfgef1 | 0.080437335 | -0.265649029 | 0.52 | 0.605 | 1 |
| Ncl | 0.08060178 | 0.341218695 | 0.427 | 0.309 | 1 |
| Snrnp200 | 0.080738993 | 0.309884567 | 0.173 | 0.086 | 1 |
| Cacnb2 | 0.080849567 | -0.266764222 | 0.867 | 0.951 | 1 |
| Swt1 | 0.081095359 | -0.318560061 | 0.533 | 0.642 | 1 |
| Pigb | 0.081269997 | -0.277405318 | 0.12 | 0.222 | 1 |
| Cdc73 | 0.081570204 | -0.321882667 | 0.387 | 0.506 | 1 |
| P4htm | 0.081648573 | 0.269940071 | 0.373 | 0.259 | 1 |
| Neto1 | 0.082304101 | -0.458607494 | 0.213 | 0.321 | 1 |
| Ski | 0.082754464 | 0.274235988 | 0.707 | 0.654 | 1 |
| Agfg1 | 0.08291939 | -0.391648426 | 0.227 | 0.333 | 1 |
| Katnal1 | 0.083114036 | 0.358062273 | 0.213 | 0.111 | 1 |
| Efcab12 | 0.083982564 | 0.282629281 | 0.467 | 0.346 | 1 |
| Wdr17 | 0.084127783 | -0.476786457 | 0.453 | 0.543 | 1 |
| Sgk3 | 0.084127791 | -0.387159604 | 0.12 | 0.222 | 1 |
| Spag9 | 0.084149064 | -0.338442193 | 0.773 | 0.827 | 1 |
| Igsf8 | 0.084184299 | 0.258465958 | 0.267 | 0.148 | 1 |
| 5430427M07Rik | 0.084355477 | -0.372192871 | 0.107 | 0.198 | 1 |
| Srpk1 | 0.084762077 | 0.25801179 | 0.28 | 0.16 | 1 |
| Slc25a37 | 0.084835389 | -0.301330117 | 0.053 | 0.136 | 1 |
| Tmem29 | 0.08509827 | 0.287592873 | 0.227 | 0.123 | 1 |
| Nmd3 | 0.08509827 | 0.27476335 | 0.227 | 0.123 | 1 |
| Cmc1 | 0.08509827 | 0.289114594 | 0.227 | 0.123 | 1 |
| Pygl | 0.085127505 | -0.437860593 | 0.293 | 0.395 | 1 |
| Eefsec | 0.085311479 | 0.439097909 | 0.547 | 0.469 | 1 |
| Lix1 | 0.085559544 | -0.313078615 | 0.213 | 0.321 | 1 |
| 5330413P13Rik | 0.086063765 | 0.268957588 | 0.493 | 0.358 | 1 |
| Kdm5a | 0.086103467 | -0.333854165 | 0.507 | 0.593 | 1 |
| Slc12a2 | 0.086247836 | -0.306614872 | 0.173 | 0.284 | 1 |
| Gdi2 | 0.086775453 | -0.287023663 | 0.4 | 0.531 | 1 |
| Pcnx2 | 0.086902729 | -0.256767231 | 0.04 | 0.111 | 1 |
| Hist3h2ba | 0.086902729 | -0.305607979 | 0.04 | 0.111 | 1 |
| Htatsf1 | 0.086989666 | -0.276279741 | 0.093 | 0.185 | 1 |
| Immp2l | 0.08711441 | 0.285135222 | 0.773 | 0.654 | 1 |
| Mark1 | 0.087142274 | -0.302445101 | 0.28 | 0.395 | 1 |
| Vps33a | 0.087180948 | -0.467147307 | 0.12 | 0.21 | 1 |
| Ly6h | 0.087201876 | 0.308581768 | 0.56 | 0.42 | 1 |
| Dner | 0.087576366 | 0.250565082 | 0.293 | 0.173 | 1 |
| Rps6ka3 | 0.08799786 | -0.346867637 | 0.347 | 0.457 | 1 |
| Foxj1 | 0.088092905 | 0.337255562 | 0.653 | 0.556 | 1 |
| Gstt2 | 0.088326898 | -0.271509752 | 0.04 | 0.111 | 1 |
| Atp6v0e | 0.088401777 | 0.289774157 | 0.267 | 0.16 | 1 |
| Plxnb2 | 0.088757003 | 0.253946041 | 0.507 | 0.358 | 1 |
| Cul4a | 0.088921356 | 0.364619878 | 0.28 | 0.185 | 1 |
| Cnn3 | 0.088946785 | 0.30921029 | 0.693 | 0.617 | 1 |
| Spidr | 0.089071073 | 0.281562267 | 0.227 | 0.123 | 1 |
| Vps26a | 0.08917363 | -0.317565912 | 0.093 | 0.185 | 1 |
| Gm11508 | 0.089345426 | 0.289565556 | 0.24 | 0.136 | 1 |
| Pnkd | 0.089773947 | 0.29709965 | 0.333 | 0.21 | 1 |
| Srsf5 | 0.089974832 | 0.298334727 | 0.76 | 0.63 | 1 |
| Selenok | 0.089976307 | 0.353217865 | 0.453 | 0.346 | 1 |
| Apoo | 0.090087272 | 0.302094869 | 0.227 | 0.123 | 1 |
| Flrt3 | 0.090682412 | -0.306285561 | 0.067 | 0.148 | 1 |
| Grk3 | 0.090700199 | 0.256412853 | 0.267 | 0.148 | 1 |
| Glmn | 0.090749521 | 0.268734318 | 0.173 | 0.086 | 1 |
| Mctp1 | 0.091127302 | -0.446247312 | 0.253 | 0.37 | 1 |
| Cand1 | 0.091150608 | -0.383263645 | 0.227 | 0.321 | 1 |
| Ccdc170 | 0.0913299 | -0.283577063 | 0.947 | 0.988 | 1 |
| Nkd1 | 0.091414057 | 0.317136794 | 0.16 | 0.074 | 1 |
| Itfg1 | 0.091686431 | -0.389321709 | 0.507 | 0.593 | 1 |
| Nap1l5 | 0.091884633 | 0.258083764 | 0.44 | 0.296 | 1 |
| Erc2 | 0.091912746 | -0.57724006 | 0.587 | 0.617 | 1 |
| Fam98b | 0.091920905 | 0.294360181 | 0.173 | 0.086 | 1 |
| Mrfap1 | 0.09199122 | 0.251789061 | 0.4 | 0.272 | 1 |
| Uqcrh | 0.092124425 | 0.267556905 | 0.293 | 0.173 | 1 |
| Fam110b | 0.092382462 | -0.331647749 | 0.213 | 0.321 | 1 |
| Nbeal1 | 0.092687317 | -0.267213871 | 0.667 | 0.728 | 1 |
| Gm12709 | 0.092809869 | -0.29864576 | 0.107 | 0.198 | 1 |
| Flot2 | 0.092809869 | -0.304281844 | 0.107 | 0.198 | 1 |
| Mt2 | 0.093062145 | 0.260963031 | 0.533 | 0.383 | 1 |
| Ranbp9 | 0.093141752 | 0.261060672 | 0.68 | 0.543 | 1 |
| Sf3b1 | 0.093440299 | -0.294546111 | 0.387 | 0.519 | 1 |
| Ccdc141 | 0.093480544 | 0.269898556 | 0.427 | 0.309 | 1 |
| Ankmy2 | 0.093946257 | 0.320153304 | 0.213 | 0.123 | 1 |
| Pds5a | 0.094238918 | -0.353251173 | 0.507 | 0.58 | 1 |
| Qser1 | 0.094824734 | -0.460680705 | 0.307 | 0.395 | 1 |
| Epb41l1 | 0.094827087 | -0.369585626 | 0.093 | 0.185 | 1 |
| Kctd1 | 0.09485379 | -0.294105591 | 0.68 | 0.704 | 1 |
| Tmem131 | 0.094924372 | 0.276724094 | 0.507 | 0.42 | 1 |
| Dock3 | 0.095261139 | -0.305171293 | 0.547 | 0.617 | 1 |
| Cyp39a1 | 0.095565792 | -0.352552535 | 0.12 | 0.21 | 1 |
| Utrn | 0.095864724 | 0.275066285 | 0.773 | 0.716 | 1 |
| Pgap1 | 0.095940369 | -0.380698666 | 0.187 | 0.296 | 1 |
| Auts2 | 0.09598429 | -0.331215949 | 0.907 | 0.877 | 1 |
| Plekha2 | 0.096028418 | -0.329764336 | 0.547 | 0.667 | 1 |
| Cdkl5 | 0.096211409 | -0.491460727 | 0.28 | 0.37 | 1 |
| Tsen34 | 0.096727434 | -0.295184038 | 0.08 | 0.16 | 1 |
| 9930021J03Rik | 0.096836875 | -0.414450658 | 0.493 | 0.58 | 1 |
| Mthfd1l | 0.097437921 | 0.49566673 | 0.267 | 0.173 | 1 |
| Zhx3 | 0.097510857 | -0.30138229 | 0.133 | 0.235 | 1 |
| Nvl | 0.097545219 | -0.284242434 | 0.333 | 0.444 | 1 |
| Sorcs1 | 0.09764545 | -0.316451716 | 0.453 | 0.556 | 1 |
| Fnbp4 | 0.097692367 | 0.300855664 | 0.36 | 0.247 | 1 |
| Col4a4 | 0.097759621 | 0.30713532 | 0.187 | 0.099 | 1 |
| Ptdss2 | 0.097759862 | -0.281636227 | 0.12 | 0.21 | 1 |
| Slc8a1 | 0.097952564 | -0.337277941 | 0.467 | 0.593 | 1 |
| Brd1 | 0.098037417 | 0.276598153 | 0.507 | 0.37 | 1 |
| Tbpl1 | 0.098105504 | -0.358763187 | 0.24 | 0.333 | 1 |
| Tmem167 | 0.098156611 | -0.256390693 | 0.293 | 0.407 | 1 |
| Pld5 | 0.098265841 | 0.552504531 | 0.32 | 0.235 | 1 |
| Adck1 | 0.098318428 | -0.404476355 | 0.173 | 0.284 | 1 |
| Nlgn1 | 0.098340482 | -0.351032148 | 0.947 | 0.988 | 1 |
| Macrod2 | 0.098406408 | -0.530407107 | 0.773 | 0.79 | 1 |
| Rab27b | 0.098439891 | -0.305100515 | 0.067 | 0.148 | 1 |
| Sema6d | 0.098468974 | -0.345208768 | 0.787 | 0.815 | 1 |
| Dytn | 0.098673177 | -0.295569634 | 0.173 | 0.272 | 1 |
| Pam | 0.098676256 | -0.464674422 | 0.467 | 0.58 | 1 |
| Fgf14 | 0.09967637 | -0.437319895 | 0.92 | 0.901 | 1 |
| Kif16b | 0.100445836 | -0.332813342 | 0.4 | 0.469 | 1 |
| Myo18a | 0.100546938 | 0.264007708 | 0.573 | 0.469 | 1 |
| Preb | 0.100573373 | 0.29641067 | 0.307 | 0.198 | 1 |
| Sumo1 | 0.10170018 | -0.39115455 | 0.853 | 0.901 | 1 |
| Camk2b | 0.101712714 | -0.368864857 | 0.307 | 0.407 | 1 |
| Fign | 0.101796997 | -0.414661207 | 0.187 | 0.284 | 1 |
| Hif1a | 0.101849223 | -0.251767419 | 0.08 | 0.16 | 1 |
| Adam17 | 0.102254655 | -0.274749948 | 0.147 | 0.247 | 1 |
| Gm43713 | 0.102702015 | -0.290965853 | 0.173 | 0.272 | 1 |
| Lrrn2 | 0.102824077 | -0.420087397 | 0.28 | 0.358 | 1 |
| Fam111a | 0.103600189 | -0.396072163 | 0.053 | 0.123 | 1 |
| Kcnb2 | 0.103813698 | -0.324437849 | 0.333 | 0.444 | 1 |
| Bfar | 0.104817412 | -0.290079489 | 0.187 | 0.284 | 1 |
| Gfm2 | 0.104880125 | 0.30924946 | 0.32 | 0.222 | 1 |
| Sptan1 | 0.104889975 | 0.301132322 | 0.8 | 0.778 | 1 |
| Vapa | 0.105259357 | -0.319946991 | 0.427 | 0.556 | 1 |
| Mettl7a1 | 0.105700941 | 0.282239309 | 0.693 | 0.605 | 1 |
| K230010J24Rik | 0.106486792 | 0.292599017 | 0.387 | 0.259 | 1 |
| Zfp207 | 0.107052217 | -0.286995414 | 0.373 | 0.481 | 1 |
| Rhbdl3 | 0.107442844 | -0.339953315 | 0.28 | 0.395 | 1 |
| S100a6 | 0.107650136 | 0.282382709 | 0.227 | 0.123 | 1 |
| Ttc5 | 0.108566261 | 0.346962815 | 0.387 | 0.309 | 1 |
| Gpi1 | 0.108778403 | -0.344349496 | 0.253 | 0.346 | 1 |
| Antxr2 | 0.108868076 | 0.359728619 | 0.467 | 0.358 | 1 |
| Cnnm1 | 0.108921014 | 0.254911385 | 0.187 | 0.099 | 1 |
| Ublcp1 | 0.109694116 | -0.280639208 | 0.16 | 0.259 | 1 |
| Lrfn2 | 0.109700063 | -0.320764597 | 0.133 | 0.235 | 1 |
| Ranbp17 | 0.109745442 | -0.396467039 | 0.253 | 0.346 | 1 |
| Usp42 | 0.109898756 | -0.395625261 | 0.147 | 0.235 | 1 |
| Abcb10 | 0.10993411 | -0.266691508 | 0.08 | 0.16 | 1 |
| Rgs20 | 0.110554462 | -0.402082768 | 0.373 | 0.494 | 1 |
| Dtx1 | 0.110719263 | 0.287494973 | 0.36 | 0.247 | 1 |
| Agk | 0.110849834 | -0.322150098 | 0.227 | 0.309 | 1 |
| Sacm1l | 0.110895178 | 0.289811379 | 0.453 | 0.358 | 1 |
| Syt1 | 0.110910721 | -0.762247862 | 0.627 | 0.716 | 1 |
| Vwc2l | 0.111033994 | 0.460639161 | 0.267 | 0.173 | 1 |
| Mboat2 | 0.111827918 | -0.250185497 | 0.387 | 0.506 | 1 |
| Hspa4l | 0.111999842 | -0.388061968 | 0.693 | 0.741 | 1 |
| Kazn | 0.112930874 | 0.291970489 | 0.733 | 0.691 | 1 |
| Polr2a | 0.11306287 | 0.308760204 | 0.4 | 0.284 | 1 |
| Deaf1 | 0.113380996 | -0.290880064 | 0.147 | 0.235 | 1 |
| Wdyhv1 | 0.113568927 | 0.319801806 | 0.347 | 0.247 | 1 |
| Rbks | 0.113918511 | 0.284490518 | 0.467 | 0.37 | 1 |
| Tfcp2 | 0.114175795 | -0.297968982 | 0.16 | 0.259 | 1 |
| Ddb1 | 0.114374984 | 0.348777611 | 0.267 | 0.173 | 1 |
| Garem1 | 0.114537166 | 0.275473076 | 0.6 | 0.457 | 1 |
| Appl1 | 0.115226312 | -0.404727975 | 0.347 | 0.444 | 1 |
| Dab1 | 0.115271349 | -0.319773078 | 0.64 | 0.741 | 1 |
| Rock2 | 0.115362647 | -0.297819196 | 0.307 | 0.42 | 1 |
| Sipa1l1 | 0.115374689 | -0.399297371 | 0.48 | 0.556 | 1 |
| Snu13 | 0.115443233 | 0.302778364 | 0.133 | 0.062 | 1 |
| Gm15738 | 0.11572331 | -0.287991017 | 0.253 | 0.358 | 1 |
| Cntn5 | 0.115737403 | -0.969726561 | 0.427 | 0.481 | 1 |
| Rab3gap1 | 0.115742186 | 0.270092064 | 0.48 | 0.358 | 1 |
| Atg16l1 | 0.115926145 | -0.333832473 | 0.2 | 0.296 | 1 |
| Pank2 | 0.116077519 | -0.286267101 | 0.213 | 0.309 | 1 |
| Kpna1 | 0.11669368 | -0.343316925 | 0.267 | 0.358 | 1 |
| Ptk2 | 0.1170611 | -0.348598946 | 0.507 | 0.58 | 1 |
| Trappc3 | 0.117063665 | 0.293050785 | 0.147 | 0.074 | 1 |
| Frmpd4 | 0.117144785 | -0.660700968 | 0.213 | 0.309 | 1 |
| Shroom3 | 0.117410701 | 0.401348369 | 0.813 | 0.815 | 1 |
| Serinc5 | 0.117642198 | 0.298162144 | 0.347 | 0.247 | 1 |
| B3glct | 0.119062741 | -0.309767979 | 0.107 | 0.185 | 1 |
| Camk4 | 0.119158873 | -0.696322843 | 0.333 | 0.407 | 1 |
| Hsp90ab1 | 0.119171041 | 0.297243202 | 0.6 | 0.506 | 1 |
| Gk | 0.119562087 | -0.323287313 | 0.293 | 0.395 | 1 |
| Fbxo31 | 0.119998314 | 0.30325431 | 0.16 | 0.086 | 1 |
| Tpd52 | 0.120312673 | 0.404407276 | 0.253 | 0.16 | 1 |
| Spef1 | 0.120392849 | 0.27219661 | 0.32 | 0.21 | 1 |
| Zfp532 | 0.120496288 | 0.299720582 | 0.68 | 0.605 | 1 |
| Wwc2 | 0.120705181 | 0.294626775 | 0.64 | 0.605 | 1 |
| Ankib1 | 0.1208368 | 0.272501664 | 0.36 | 0.247 | 1 |
| Uba6 | 0.121000393 | 0.330903235 | 0.28 | 0.198 | 1 |
| Far1 | 0.121212208 | -0.26918874 | 0.213 | 0.333 | 1 |
| Pten | 0.121389819 | -0.332335355 | 0.52 | 0.58 | 1 |
| Trim24 | 0.121615789 | -0.396233193 | 0.347 | 0.432 | 1 |
| 1110004F10Rik | 0.122824471 | -0.368981138 | 0.347 | 0.444 | 1 |
| Clu | 0.122869451 | 0.3035164 | 0.76 | 0.716 | 1 |
| Grb14 | 0.123116527 | -0.314030563 | 0.227 | 0.333 | 1 |
| Cadm2 | 0.123175408 | -0.363148819 | 0.88 | 0.84 | 1 |
| Atp1a2 | 0.123549078 | 0.335891624 | 0.64 | 0.58 | 1 |
| Mysm1 | 0.123686019 | -0.295899194 | 0.293 | 0.42 | 1 |
| Tdrkh | 0.124115855 | -0.274521415 | 0.08 | 0.148 | 1 |
| Rhobtb3 | 0.12438137 | -0.285524132 | 0.093 | 0.173 | 1 |
| Lsamp | 0.124460932 | -1.002416701 | 0.92 | 0.914 | 1 |
| Nat8l | 0.124983719 | 0.307962421 | 0.24 | 0.148 | 1 |
| Pkia | 0.125693132 | 0.368996517 | 0.587 | 0.481 | 1 |
| Frs2 | 0.126094719 | -0.264392694 | 0.32 | 0.42 | 1 |
| Chd8 | 0.126185753 | -0.324693444 | 0.373 | 0.457 | 1 |
| Opcml | 0.126562203 | -1.071774807 | 0.453 | 0.556 | 1 |
| Tom1l2 | 0.126836512 | -0.360605063 | 0.56 | 0.63 | 1 |
| Nfatc1 | 0.126947404 | 0.252116162 | 0.32 | 0.222 | 1 |
| Cit | 0.127191002 | -0.334236213 | 0.307 | 0.383 | 1 |
| Cep250 | 0.127225842 | -0.250925168 | 0.24 | 0.346 | 1 |
| 4430402I18Rik | 0.127921809 | 0.282241356 | 0.64 | 0.568 | 1 |
| Kras | 0.127996603 | -0.273873572 | 0.187 | 0.284 | 1 |
| Dlgap2 | 0.128082647 | -0.87052714 | 0.227 | 0.309 | 1 |
| Nfs1 | 0.12828184 | -0.352279152 | 0.187 | 0.272 | 1 |
| Cphx3 | 0.128305194 | -0.354695719 | 0.573 | 0.667 | 1 |
| Rbbp4 | 0.129358732 | -0.283673993 | 0.24 | 0.333 | 1 |
| Rims1 | 0.130035688 | -0.383350515 | 0.32 | 0.432 | 1 |
| Sall3 | 0.130535925 | -0.391635024 | 0.133 | 0.21 | 1 |
| Yipf4 | 0.130571959 | -0.258821947 | 0.147 | 0.247 | 1 |
| Picalm | 0.131168332 | 0.275600755 | 0.467 | 0.37 | 1 |
| Mapk1 | 0.131299754 | -0.252336263 | 0.533 | 0.617 | 1 |
| Wrnip1 | 0.1315029 | 0.25154405 | 0.147 | 0.074 | 1 |
| Nfat5 | 0.131513808 | -0.364557654 | 0.547 | 0.593 | 1 |
| Plcd4 | 0.132048969 | 0.338209684 | 0.333 | 0.235 | 1 |
| Pced1b | 0.132074038 | -0.260619592 | 0.387 | 0.494 | 1 |
| Sik2 | 0.132799549 | -0.294634668 | 0.427 | 0.531 | 1 |
| Fam135b | 0.132827565 | -0.279292722 | 0.133 | 0.222 | 1 |
| Snx5 | 0.132999346 | -0.36979072 | 0.2 | 0.284 | 1 |
| Ankrd44 | 0.133370273 | 0.289312507 | 0.893 | 0.926 | 1 |
| Gm17202 | 0.133416194 | -0.281150861 | 0.093 | 0.173 | 1 |
| Rps9 | 0.133556741 | 0.284790181 | 0.413 | 0.309 | 1 |
| Ccdc50 | 0.133982557 | 0.28326602 | 0.44 | 0.333 | 1 |
| Ccdc173 | 0.134021848 | -0.251446088 | 0.627 | 0.716 | 1 |
| Iqgap1 | 0.134025978 | 0.270021791 | 0.4 | 0.284 | 1 |
| Gpx4 | 0.134092251 | 0.275794052 | 0.413 | 0.309 | 1 |
| Uhmk1 | 0.134200095 | -0.334273122 | 0.133 | 0.222 | 1 |
| Gm47096 | 0.134422547 | 0.281477856 | 0.28 | 0.185 | 1 |
| Klhl41 | 0.134764453 | -0.2705394 | 0.067 | 0.136 | 1 |
| Strip2 | 0.134764453 | -0.287572137 | 0.067 | 0.136 | 1 |
| Mecom | 0.134891751 | 0.558631837 | 0.147 | 0.074 | 1 |
| Foxo3 | 0.13561563 | 0.432844236 | 0.413 | 0.321 | 1 |
| Ndufa12 | 0.136279421 | 0.294532552 | 0.227 | 0.136 | 1 |
| Ncdn | 0.136336176 | -0.312998721 | 0.347 | 0.432 | 1 |
| Wdr37 | 0.136468702 | -0.371529524 | 0.28 | 0.37 | 1 |
| Etnk1 | 0.136946801 | -0.319325159 | 0.467 | 0.506 | 1 |
| Gm15886 | 0.137386858 | -0.380783456 | 0.16 | 0.247 | 1 |
| Srp19 | 0.138120067 | 0.285808374 | 0.173 | 0.099 | 1 |
| Ccz1 | 0.138383528 | -0.279295329 | 0.133 | 0.222 | 1 |
| Soga1 | 0.138575145 | -0.295249996 | 0.24 | 0.346 | 1 |
| Adcy5 | 0.139052352 | -0.487251171 | 0.32 | 0.383 | 1 |
| Gm4876 | 0.139440171 | 0.25103758 | 0.933 | 0.889 | 1 |
| Lrriq3 | 0.13974962 | 0.25331706 | 0.347 | 0.235 | 1 |
| Pitpnm3 | 0.139792311 | -0.294115917 | 0.6 | 0.728 | 1 |
| Nup153 | 0.139842055 | -0.283321914 | 0.427 | 0.531 | 1 |
| Larp1b | 0.140084564 | -0.25239735 | 0.12 | 0.21 | 1 |
| Ncan | 0.140478579 | 0.286289261 | 0.32 | 0.222 | 1 |
| Plaa | 0.141072262 | -0.350195766 | 0.2 | 0.296 | 1 |
| Ptdss1 | 0.141326307 | 0.34990145 | 0.173 | 0.099 | 1 |
| Srr | 0.141705683 | 0.255536495 | 0.32 | 0.222 | 1 |
| Txlng | 0.14189134 | -0.259627082 | 0.333 | 0.457 | 1 |
| Pianp | 0.141933808 | -0.410720164 | 0.067 | 0.136 | 1 |
| Ehmt1 | 0.141962056 | -0.35800097 | 0.56 | 0.568 | 1 |
| Rcor1 | 0.142314126 | -0.401169383 | 0.28 | 0.383 | 1 |
| Sf1 | 0.143451804 | -0.339489024 | 0.413 | 0.469 | 1 |
| Fkbp14 | 0.143982736 | 0.371287369 | 0.16 | 0.086 | 1 |
| Arl15 | 0.144242795 | -0.384895414 | 0.493 | 0.568 | 1 |
| Trappc12 | 0.145381759 | 0.258799824 | 0.28 | 0.185 | 1 |
| 4931414P19Rik | 0.145578253 | -0.281173478 | 0.133 | 0.222 | 1 |
| Pir | 0.146016154 | -0.529792649 | 0.44 | 0.481 | 1 |
| Rph3al | 0.146243935 | 0.356980334 | 0.293 | 0.198 | 1 |
| Tmem164 | 0.14679343 | -0.372705525 | 0.427 | 0.506 | 1 |
| Vcp | 0.147380997 | -0.306772691 | 0.333 | 0.42 | 1 |
| Fam49b | 0.147509505 | -0.373906194 | 0.467 | 0.543 | 1 |
| Alkbh1 | 0.147910002 | 0.258062358 | 0.173 | 0.099 | 1 |
| Cxcr4 | 0.147956612 | 0.279145822 | 0.307 | 0.21 | 1 |
| Ppp3ca | 0.148836028 | -0.331011611 | 1 | 0.963 | 1 |
| Cstf3 | 0.148906743 | -0.326191201 | 0.44 | 0.531 | 1 |
| Mir124-2hg | 0.14919326 | 0.250924298 | 0.16 | 0.086 | 1 |
| Gm47271 | 0.149353993 | -0.311205798 | 0.08 | 0.148 | 1 |
| Vps35 | 0.149415211 | 0.294247035 | 0.507 | 0.383 | 1 |
| Lhfpl4 | 0.149783562 | -0.316789931 | 0.32 | 0.395 | 1 |
| Snx9 | 0.15018685 | -0.279440002 | 0.173 | 0.259 | 1 |
| Crtc1 | 0.150211864 | -0.254887718 | 0.147 | 0.235 | 1 |
| Atp5g1 | 0.150284752 | -0.270933977 | 0.12 | 0.198 | 1 |
| 6030458C11Rik | 0.150284752 | -0.313989511 | 0.12 | 0.198 | 1 |
| Fsip1 | 0.150348414 | 0.26182689 | 0.533 | 0.395 | 1 |
| Mtg2 | 0.150576669 | -0.257466139 | 0.147 | 0.222 | 1 |
| Gpr63 | 0.150576669 | -0.325654219 | 0.147 | 0.222 | 1 |
| Peg3 | 0.150809056 | -0.355976577 | 0.36 | 0.432 | 1 |
| Il6ra | 0.150939695 | 0.255528245 | 0.533 | 0.432 | 1 |
| Sema3e | 0.151228218 | 0.378842623 | 0.613 | 0.543 | 1 |
| Cltc | 0.151244342 | -0.288299029 | 0.347 | 0.432 | 1 |
| Cep295 | 0.151288518 | -0.287629254 | 0.093 | 0.173 | 1 |
| Mak | 0.151761189 | 0.271409944 | 0.6 | 0.531 | 1 |
| Plcb1 | 0.151941759 | -0.460372444 | 0.787 | 0.79 | 1 |
| Ndufa8 | 0.152091869 | 0.344883426 | 0.187 | 0.111 | 1 |
| Ctdspl2 | 0.152462628 | -0.288112652 | 0.267 | 0.358 | 1 |
| Ppp6r2 | 0.152470825 | -0.333819119 | 0.227 | 0.309 | 1 |
| Gm2000 | 0.152778699 | 0.273759455 | 0.36 | 0.259 | 1 |
| Ppp6r3 | 0.153055441 | -0.279186608 | 0.507 | 0.605 | 1 |
| Ddx6 | 0.153806154 | -0.283022692 | 0.64 | 0.704 | 1 |
| Matn2 | 0.154585946 | -0.317358017 | 0.133 | 0.222 | 1 |
| 3300002I08Rik | 0.154800505 | -0.271701681 | 0.093 | 0.16 | 1 |
| 1700010K24Rik | 0.155092014 | -0.468424106 | 0.227 | 0.309 | 1 |
| Ptpn2 | 0.155092014 | 0.48689488 | 0.307 | 0.235 | 1 |
| Scai | 0.155394808 | 0.282222576 | 0.84 | 0.815 | 1 |
| Rnf34 | 0.155410365 | 0.387478189 | 0.187 | 0.111 | 1 |
| Cox7b | 0.155619396 | 0.264114455 | 0.293 | 0.198 | 1 |
| Ehbp1 | 0.155715029 | -0.280213351 | 0.787 | 0.901 | 1 |
| Gm26904 | 0.155754345 | -0.303882808 | 0.24 | 0.346 | 1 |
| Rpn2 | 0.155982736 | 0.278693361 | 0.4 | 0.296 | 1 |
| Lcor | 0.156009072 | -0.269100026 | 0.48 | 0.568 | 1 |
| Efna5 | 0.156009438 | -0.549643387 | 0.493 | 0.556 | 1 |
| Pde10a | 0.156030698 | -0.498128943 | 0.8 | 0.815 | 1 |
| Tctn1 | 0.156306138 | -0.272167712 | 0.2 | 0.284 | 1 |
| Wnt9a | 0.156362947 | 0.263874734 | 0.16 | 0.086 | 1 |
| Xpr1 | 0.156858383 | -0.405974832 | 0.507 | 0.568 | 1 |
| Nsf | 0.157137138 | -0.291678103 | 0.587 | 0.716 | 1 |
| Psd3 | 0.157440546 | -0.251659886 | 0.8 | 0.802 | 1 |
| Kpna4 | 0.157945865 | -0.350643037 | 0.587 | 0.63 | 1 |
| Uchl1os | 0.158138129 | 0.426768235 | 0.227 | 0.148 | 1 |
| Cyb5r4 | 0.15861128 | -0.288589133 | 0.133 | 0.21 | 1 |
| Mtmr7 | 0.15878354 | -0.289320576 | 0.107 | 0.185 | 1 |
| Zmym2 | 0.159579641 | -0.329383657 | 0.4 | 0.481 | 1 |
| Chd1 | 0.15995435 | -0.283380751 | 0.387 | 0.469 | 1 |
| Coq9 | 0.161618959 | 0.263290902 | 0.2 | 0.123 | 1 |
| Kif26b | 0.161630765 | 0.272544629 | 0.653 | 0.556 | 1 |
| Ptn | 0.162167504 | -0.329421191 | 0.293 | 0.395 | 1 |
| Actr2 | 0.162183941 | -0.305279268 | 0.32 | 0.407 | 1 |
| Dscaml1 | 0.162395536 | -0.324834433 | 0.08 | 0.148 | 1 |
| Gm45844 | 0.162549273 | 0.389248352 | 0.44 | 0.358 | 1 |
| Hs3st5 | 0.162621699 | -0.266970433 | 0.133 | 0.21 | 1 |
| Nbea | 0.162692248 | -0.293256713 | 0.707 | 0.765 | 1 |
| Gemin8 | 0.163065572 | -0.277972151 | 0.32 | 0.395 | 1 |
| Man1c1 | 0.163433804 | -0.337071988 | 0.133 | 0.21 | 1 |
| Gm39469 | 0.164010874 | -0.250371889 | 0.133 | 0.222 | 1 |
| Gm2164 | 0.16415812 | -0.480369336 | 0.053 | 0.111 | 1 |
| Lmo4 | 0.164673002 | 0.420317766 | 0.653 | 0.593 | 1 |
| Krit1 | 0.165589337 | -0.295731574 | 0.347 | 0.444 | 1 |
| Socs5 | 0.1667097 | 0.380439148 | 0.213 | 0.136 | 1 |
| Dido1 | 0.16796786 | 0.256282506 | 0.467 | 0.37 | 1 |
| Ccnd2 | 0.1680631 | 0.298817047 | 0.373 | 0.284 | 1 |
| Rbx1 | 0.168589548 | -0.285280199 | 0.187 | 0.272 | 1 |
| Afg3l2 | 0.169202643 | 0.269434658 | 0.227 | 0.148 | 1 |
| Ugp2 | 0.169263857 | -0.370996717 | 0.48 | 0.519 | 1 |
| Lima1 | 0.169295314 | -0.33130083 | 0.107 | 0.173 | 1 |
| Arntl | 0.170580358 | 0.36090371 | 0.107 | 0.049 | 1 |
| Hmg20a | 0.170797529 | -0.355381859 | 0.44 | 0.506 | 1 |
| Map3k20 | 0.171583657 | 0.321734312 | 0.4 | 0.309 | 1 |
| Man1a | 0.171740415 | -0.325420969 | 0.547 | 0.654 | 1 |
| Fbn1 | 0.172225263 | 0.281619868 | 0.28 | 0.198 | 1 |
| P4hb | 0.172468178 | 0.342685044 | 0.227 | 0.148 | 1 |
| Ggact | 0.172495654 | -0.253004891 | 0.16 | 0.235 | 1 |
| Gys1 | 0.173287966 | -0.267823982 | 0.093 | 0.16 | 1 |
| Ogfrl1 | 0.173291141 | 0.293501753 | 0.227 | 0.148 | 1 |
| Erich2 | 0.173313124 | -0.321118002 | 0.467 | 0.494 | 1 |
| Usp31 | 0.173568464 | -0.268598031 | 0.24 | 0.321 | 1 |
| Zranb2 | 0.173717482 | -0.457774471 | 0.267 | 0.346 | 1 |
| Sept3 | 0.173858995 | -0.309205129 | 0.16 | 0.247 | 1 |
| Gmfb | 0.174259846 | -0.273559264 | 0.173 | 0.247 | 1 |
| Lrrc49 | 0.174502066 | -0.35392442 | 0.587 | 0.605 | 1 |
| Edil3 | 0.174513451 | 0.351762678 | 0.267 | 0.173 | 1 |
| Spata7 | 0.174586609 | 0.337738491 | 0.693 | 0.654 | 1 |
| Uqcc1 | 0.175535201 | 0.306310192 | 0.347 | 0.259 | 1 |
| Ncbp3 | 0.176863046 | -0.263714041 | 0.173 | 0.259 | 1 |
| Celf1 | 0.177824751 | -0.298906671 | 0.6 | 0.679 | 1 |
| Atxn2l | 0.177845153 | -0.330170794 | 0.24 | 0.321 | 1 |
| Gpc5 | 0.177985891 | -0.502809521 | 0.24 | 0.309 | 1 |
| Cir1 | 0.178231077 | -0.314074309 | 0.173 | 0.247 | 1 |
| Creb5 | 0.178377729 | 0.287649545 | 0.667 | 0.63 | 1 |
| Snrk | 0.179288009 | -0.306152297 | 0.24 | 0.321 | 1 |
| Hdlbp | 0.180192097 | 0.43177036 | 0.36 | 0.296 | 1 |
| Robo1 | 0.180479533 | -0.276143597 | 0.4 | 0.494 | 1 |
| Gle1 | 0.180584658 | -0.265803066 | 0.12 | 0.185 | 1 |
| Mir670hg | 0.180663198 | 0.354609557 | 0.52 | 0.494 | 1 |
| Gm26733 | 0.180845941 | -0.309327558 | 0.32 | 0.407 | 1 |
| Pcdh11x | 0.181671298 | -0.456830082 | 0.187 | 0.259 | 1 |
| Pcsk7 | 0.182306755 | -0.274937964 | 0.16 | 0.235 | 1 |
| Rps6ka1 | 0.182874491 | 0.251289138 | 0.107 | 0.049 | 1 |
| Zfp804a | 0.182928029 | -0.34365402 | 0.2 | 0.272 | 1 |
| Spag1 | 0.183581792 | 0.252065693 | 0.373 | 0.296 | 1 |
| Pin1 | 0.185574146 | 0.313346377 | 0.133 | 0.074 | 1 |
| Chil5 | 0.185667401 | -0.268093231 | 0.16 | 0.235 | 1 |
| Dgke | 0.186160364 | 0.366414915 | 0.16 | 0.099 | 1 |
| Slc24a5 | 0.186205074 | -0.256625538 | 0.12 | 0.198 | 1 |
| Mtss1 | 0.18647129 | 0.251943401 | 0.413 | 0.333 | 1 |
| Trappc13 | 0.186482596 | -0.42208119 | 0.187 | 0.259 | 1 |
| Phf20 | 0.186981315 | 0.382961756 | 0.533 | 0.432 | 1 |
| Clmn | 0.187101277 | -0.273093845 | 0.707 | 0.79 | 1 |
| Grk5 | 0.187268669 | -0.396276151 | 0.2 | 0.284 | 1 |
| P2ry14 | 0.188034487 | -0.277613566 | 0.173 | 0.247 | 1 |
| Grm5 | 0.188304807 | -0.562019083 | 0.707 | 0.741 | 1 |
| St8sia3 | 0.188848689 | -0.281936774 | 0.2 | 0.284 | 1 |
| Vps72 | 0.189215301 | 0.274520591 | 0.213 | 0.136 | 1 |
| 4930488L21Rik | 0.190373745 | 0.305742339 | 0.267 | 0.198 | 1 |
| Rbfox1 | 0.191581242 | -0.731523744 | 0.853 | 0.667 | 1 |
| Arid1b | 0.191926004 | 0.301602332 | 0.8 | 0.704 | 1 |
| Rit1.1 | 0.192303466 | -0.400873394 | 0.307 | 0.383 | 1 |
| Sdha | 0.192847808 | 0.386576441 | 0.467 | 0.383 | 1 |
| Arvcf | 0.193399542 | 0.295583825 | 0.52 | 0.432 | 1 |
| 2610037D02Rik | 0.193837644 | 0.33191787 | 0.627 | 0.519 | 1 |
| Cdk8 | 0.194686744 | -0.251902862 | 0.467 | 0.531 | 1 |
| Arhgdia | 0.194699752 | -0.366089674 | 0.067 | 0.123 | 1 |
| Tpp1 | 0.194850995 | -0.290981627 | 0.147 | 0.222 | 1 |
| Mrps6 | 0.195324625 | 0.265296706 | 0.413 | 0.321 | 1 |
| Tacc1 | 0.195746969 | -0.326279124 | 0.533 | 0.605 | 1 |
| Tbc1d8 | 0.195748271 | -0.294025204 | 0.12 | 0.185 | 1 |
| Smc6 | 0.196386464 | -0.328626939 | 0.187 | 0.259 | 1 |
| Cdon | 0.196614031 | -0.359770653 | 0.307 | 0.383 | 1 |
| Prdm11 | 0.197097191 | -0.265182323 | 0.067 | 0.123 | 1 |
| Ube2k | 0.197413999 | 0.341049276 | 0.613 | 0.556 | 1 |
| Zbed4 | 0.197707476 | -0.297496516 | 0.12 | 0.185 | 1 |
| Zdhhc21 | 0.198705127 | -0.380906562 | 0.253 | 0.333 | 1 |
| Plppr3 | 0.198843731 | 0.254469543 | 0.32 | 0.247 | 1 |
| Nat8f6 | 0.199516172 | -0.27044582 | 0.067 | 0.123 | 1 |
| Lrp6 | 0.200431388 | -0.281536843 | 0.613 | 0.605 | 1 |
| Rasa2 | 0.200915234 | -0.289267828 | 0.707 | 0.728 | 1 |
| Lrrc4b | 0.201322508 | -0.327774437 | 0.32 | 0.383 | 1 |
| Rbm12b2 | 0.20195677 | -0.272407469 | 0.067 | 0.123 | 1 |
| Astn1 | 0.20263218 | -0.271764343 | 0.453 | 0.543 | 1 |
| Airn | 0.20278247 | 0.396582731 | 0.533 | 0.432 | 1 |
| Sft2d2 | 0.202841369 | 0.253589229 | 0.12 | 0.062 | 1 |
| Msra | 0.203199769 | -0.296925227 | 0.187 | 0.259 | 1 |
| Aqr | 0.20351323 | -0.261058869 | 0.2 | 0.284 | 1 |
| Saraf | 0.204132394 | 0.262864664 | 0.44 | 0.346 | 1 |
| Metrn | 0.204414638 | 0.288838139 | 0.307 | 0.222 | 1 |
| Osbpl8 | 0.20520571 | -0.317387655 | 0.427 | 0.481 | 1 |
| Dnm3 | 0.205232171 | -0.426877859 | 0.227 | 0.296 | 1 |
| Chpt1 | 0.205373109 | -0.33342513 | 0.733 | 0.704 | 1 |
| Rad23b | 0.205446645 | -0.280810301 | 0.307 | 0.383 | 1 |
| Grid1 | 0.205722417 | -0.329459563 | 0.4 | 0.494 | 1 |
| Plppr1 | 0.206053275 | -0.375686794 | 0.227 | 0.296 | 1 |
| Rasgef1b | 0.20701531 | -0.347135751 | 0.147 | 0.21 | 1 |
| Aph1b | 0.207157503 | -0.321838653 | 0.187 | 0.272 | 1 |
| Zmiz1os1 | 0.207169007 | 0.256094306 | 0.32 | 0.235 | 1 |
| Tubb2a | 0.207293527 | 0.319401877 | 0.333 | 0.259 | 1 |
| Samd12 | 0.207763437 | -0.406721198 | 0.333 | 0.407 | 1 |
| Fmr1 | 0.209227992 | -0.291720425 | 0.2 | 0.272 | 1 |
| Gm29266 | 0.209581503 | -0.290291419 | 0.573 | 0.642 | 1 |
| Btbd11 | 0.211050144 | 0.264992886 | 0.587 | 0.531 | 1 |
| Uvrag | 0.211231291 | 0.263921079 | 0.413 | 0.309 | 1 |
| Ndufaf4 | 0.211757529 | 0.294853096 | 0.16 | 0.099 | 1 |
| Fam171b | 0.212024404 | -0.357886783 | 0.373 | 0.457 | 1 |
| Zkscan3 | 0.212750292 | -0.356318671 | 0.387 | 0.444 | 1 |
| Ggps1 | 0.213024642 | -0.26476334 | 0.307 | 0.383 | 1 |
| Tbck | 0.215321933 | 0.391815618 | 0.44 | 0.407 | 1 |
| Ggnbp2 | 0.215944814 | -0.269542635 | 0.52 | 0.568 | 1 |
| Skil | 0.216186819 | 0.369954163 | 0.173 | 0.111 | 1 |
| Crk | 0.216218212 | -0.400068582 | 0.267 | 0.333 | 1 |
| Pxn | 0.217521376 | 0.255709596 | 0.427 | 0.333 | 1 |
| Lrp12 | 0.2177043 | 0.254084909 | 0.213 | 0.148 | 1 |
| Bbs9 | 0.217769233 | -0.262748713 | 0.76 | 0.79 | 1 |
| Rapgef4 | 0.217942807 | 0.305347617 | 0.533 | 0.457 | 1 |
| Gm15261 | 0.217961567 | -0.336452352 | 0.173 | 0.247 | 1 |
| Pclo | 0.219083873 | -0.363212143 | 0.413 | 0.469 | 1 |
| Akirin2 | 0.219557237 | 0.341730844 | 0.253 | 0.185 | 1 |
| Ube2h | 0.220112668 | 0.269721366 | 0.467 | 0.37 | 1 |
| Usp40 | 0.220859293 | -0.263235145 | 0.373 | 0.457 | 1 |
| Ap1s1 | 0.220914971 | 0.267121477 | 0.2 | 0.136 | 1 |
| Slc24a2 | 0.221989252 | -0.310028296 | 0.32 | 0.395 | 1 |
| C130071C03Rik | 0.222332235 | -0.317780809 | 0.627 | 0.753 | 1 |
| Kcnip3 | 0.22234538 | -0.260988359 | 0.12 | 0.185 | 1 |
| Dusp18 | 0.223579957 | 0.273069601 | 0.253 | 0.173 | 1 |
| Hs3st4 | 0.224022379 | -0.374475484 | 0.133 | 0.198 | 1 |
| Nenf | 0.225558854 | 0.281522115 | 0.227 | 0.16 | 1 |
| Erich3 | 0.225749235 | 0.324131855 | 0.72 | 0.63 | 1 |
| Taf1 | 0.225924723 | -0.344894849 | 0.333 | 0.383 | 1 |
| Psme4 | 0.226294389 | -0.255086071 | 0.653 | 0.765 | 1 |
| Alcam | 0.22797726 | -0.290363866 | 0.733 | 0.679 | 1 |
| Zdhhc14 | 0.228834543 | -0.261809073 | 0.12 | 0.185 | 1 |
| Ccdc157 | 0.229793659 | 0.268455451 | 0.413 | 0.358 | 1 |
| Acer3 | 0.229834603 | -0.332363112 | 0.427 | 0.506 | 1 |
| Adam10 | 0.230724439 | -0.284228843 | 0.373 | 0.457 | 1 |
| Kcnc2 | 0.230914765 | -0.27261825 | 0.613 | 0.617 | 1 |
| Ptbp3 | 0.23118229 | -0.264961867 | 0.253 | 0.346 | 1 |
| Gm28729 | 0.231230043 | -0.306571019 | 0.493 | 0.556 | 1 |
| Smarcc2 | 0.232069266 | -0.288792848 | 0.427 | 0.494 | 1 |
| Nsmaf | 0.23366668 | -0.282053736 | 0.307 | 0.383 | 1 |
| Vps41 | 0.234965601 | -0.282375229 | 0.413 | 0.481 | 1 |
| Sppl3 | 0.235007922 | -0.351306436 | 0.373 | 0.444 | 1 |
| Dock5 | 0.235683248 | 0.251852105 | 0.2 | 0.136 | 1 |
| Fkbp1a | 0.236397224 | -0.324632392 | 0.253 | 0.321 | 1 |
| Cspg5 | 0.236397224 | -0.372601048 | 0.253 | 0.321 | 1 |
| Cabin1 | 0.236753892 | 0.258422928 | 0.467 | 0.395 | 1 |
| Nxn | 0.236819443 | -0.364661788 | 0.653 | 0.79 | 1 |
| Fbxw2 | 0.238495863 | -0.427320193 | 0.24 | 0.296 | 1 |
| Snx29 | 0.239246252 | -0.256350883 | 0.293 | 0.383 | 1 |
| Ubr4 | 0.239401719 | 0.265451837 | 0.307 | 0.235 | 1 |
| Vps54 | 0.239662837 | -0.267429448 | 0.36 | 0.432 | 1 |
| Apba1 | 0.239682764 | 0.300924643 | 0.227 | 0.16 | 1 |
| Kcnmb1 | 0.239688313 | 0.293217718 | 0.4 | 0.333 | 1 |
| Slc9a1 | 0.240438837 | -0.273796195 | 0.093 | 0.148 | 1 |
| 5730455P16Rik | 0.240520326 | 0.290455122 | 0.253 | 0.185 | 1 |
| Camkmt | 0.242076826 | -0.512809669 | 0.36 | 0.432 | 1 |
| Trim33 | 0.243084477 | -0.311696619 | 0.533 | 0.543 | 1 |
| Desi2 | 0.24334372 | -0.274483993 | 0.36 | 0.444 | 1 |
| Hmgn3 | 0.244887816 | -0.298257773 | 0.227 | 0.309 | 1 |
| Fam229b | 0.24921825 | -0.393536242 | 0.413 | 0.432 | 1 |
| Sgk1 | 0.249620523 | -0.313381282 | 0.173 | 0.235 | 1 |
| Trim41 | 0.250501099 | 0.265585248 | 0.253 | 0.185 | 1 |
| Tulp3 | 0.250707312 | -0.315828017 | 0.573 | 0.642 | 1 |
| Dab2ip | 0.252457706 | 0.264563909 | 0.333 | 0.259 | 1 |
| Vat1l | 0.253175575 | -0.288952969 | 0.093 | 0.148 | 1 |
| Synm | 0.253293981 | 0.326167366 | 0.453 | 0.395 | 1 |
| Snap23 | 0.253779709 | -0.26798359 | 0.173 | 0.235 | 1 |
| Gm26836 | 0.255598471 | -0.28236873 | 0.187 | 0.247 | 1 |
| Kctd3 | 0.256762332 | -0.296059547 | 0.2 | 0.259 | 1 |
| Amotl2 | 0.257163336 | 0.357369045 | 0.453 | 0.383 | 1 |
| Sipa1l2 | 0.258750749 | 0.252221109 | 0.533 | 0.457 | 1 |
| Gm11099 | 0.259980186 | -0.372378144 | 0.307 | 0.37 | 1 |
| Spen | 0.260505423 | -0.290342486 | 0.387 | 0.444 | 1 |
| Timm9 | 0.260597726 | -0.32764543 | 0.173 | 0.222 | 1 |
| Gls | 0.261613835 | -0.282601565 | 0.453 | 0.506 | 1 |
| Hps5 | 0.262018803 | -0.259285384 | 0.16 | 0.222 | 1 |
| Vrk2 | 0.262915405 | -0.390752457 | 0.28 | 0.333 | 1 |
| Ppfia2 | 0.263297121 | -0.301164501 | 0.347 | 0.395 | 1 |
| Cdh13 | 0.263881765 | -0.472121567 | 0.253 | 0.309 | 1 |
| Rpl41 | 0.264569394 | 0.275376609 | 0.613 | 0.593 | 1 |
| Grid2 | 0.266318287 | -0.283248652 | 0.867 | 0.864 | 1 |
| Spred2 | 0.26656233 | -0.2887803 | 0.227 | 0.296 | 1 |
| Fbxl3 | 0.267215881 | -0.283555343 | 0.32 | 0.383 | 1 |
| Specc1 | 0.267958393 | -0.403893156 | 0.187 | 0.235 | 1 |
| Igsf11 | 0.268511763 | -0.282474911 | 0.6 | 0.605 | 1 |
| Tbc1d4 | 0.268665067 | -0.382842449 | 0.107 | 0.16 | 1 |
| Aldh6a1 | 0.270047722 | -0.326143135 | 0.16 | 0.21 | 1 |
| Cdyl2 | 0.270894654 | -0.272665135 | 0.16 | 0.222 | 1 |
| Abhd3 | 0.271248349 | -0.333243086 | 0.413 | 0.481 | 1 |
| Drg1 | 0.271331989 | 0.290824188 | 0.347 | 0.272 | 1 |
| Flrt1 | 0.273526587 | -0.253759561 | 0.227 | 0.296 | 1 |
| Scn3b | 0.273639247 | 0.252417155 | 0.307 | 0.235 | 1 |
| Ccdc190 | 0.274173613 | 0.330111843 | 0.453 | 0.383 | 1 |
| Zzz3 | 0.274618739 | -0.323866822 | 0.36 | 0.42 | 1 |
| Stx8 | 0.274637892 | 0.312586173 | 0.333 | 0.272 | 1 |
| Ksr2.1 | 0.275348523 | -0.285860572 | 0.2 | 0.259 | 1 |
| Rraga | 0.276361986 | 0.287112016 | 0.133 | 0.086 | 1 |
| Hcn1 | 0.276504815 | -0.381701197 | 0.107 | 0.16 | 1 |
| Iqcg | 0.27823351 | -0.26114744 | 0.733 | 0.691 | 1 |
| Gkap1 | 0.279480922 | -0.28520893 | 0.533 | 0.593 | 1 |
| Naa20 | 0.279971579 | -0.29215698 | 0.187 | 0.247 | 1 |
| Rbfox2 | 0.280196758 | 0.269338134 | 0.813 | 0.765 | 1 |
| Cep78 | 0.281254154 | -0.265775216 | 0.133 | 0.185 | 1 |
| Rabep1 | 0.281565204 | -0.270404115 | 0.4 | 0.481 | 1 |
| Hivep1 | 0.28281787 | -0.275045725 | 0.2 | 0.259 | 1 |
| Hadha | 0.284190854 | -0.255420008 | 0.147 | 0.21 | 1 |
| 9130401M01Rik | 0.284499092 | 0.329043909 | 0.16 | 0.111 | 1 |
| Uba2 | 0.284533225 | -0.309655861 | 0.213 | 0.259 | 1 |
| Smg7 | 0.285946006 | -0.260977413 | 0.427 | 0.457 | 1 |
| Rnf111 | 0.286981246 | -0.348502955 | 0.333 | 0.395 | 1 |
| Ktn1 | 0.288597222 | 0.291668187 | 0.467 | 0.42 | 1 |
| Chp1 | 0.289258731 | -0.267982079 | 0.16 | 0.222 | 1 |
| Anxa4 | 0.289661933 | -0.300567133 | 0.067 | 0.111 | 1 |
| Gria4 | 0.290018165 | -0.425171844 | 0.28 | 0.346 | 1 |
| Gm29538 | 0.291317342 | 0.250987702 | 0.413 | 0.333 | 1 |
| Fgd4 | 0.292868761 | -0.309158665 | 0.667 | 0.667 | 1 |
| Acyp2 | 0.293603198 | -0.280670584 | 0.413 | 0.506 | 1 |
| Hp1bp3 | 0.294103409 | -0.358893346 | 0.24 | 0.284 | 1 |
| Chd1l | 0.295184711 | -0.251212229 | 0.12 | 0.173 | 1 |
| Ppp2r3a | 0.295285042 | 0.269998318 | 0.733 | 0.691 | 1 |
| Mdga2 | 0.296218792 | -0.578844602 | 0.76 | 0.728 | 1 |
| Znrf1 | 0.298038971 | -0.265239422 | 0.253 | 0.296 | 1 |
| Nrxn1 | 0.300258033 | -0.685196673 | 0.84 | 0.778 | 1 |
| Ndrg4 | 0.300645398 | -0.27802484 | 0.587 | 0.617 | 1 |
| Slc25a14 | 0.302652451 | -0.258786779 | 0.2 | 0.259 | 1 |
| Tenm2 | 0.302803323 | -0.807760905 | 0.733 | 0.691 | 1 |
| Ppm1l | 0.302971666 | -0.305429376 | 0.32 | 0.37 | 1 |
| Sugct | 0.3030138 | -0.254891477 | 0.573 | 0.654 | 1 |
| Gtf2h2 | 0.304063014 | -0.300004725 | 0.267 | 0.321 | 1 |
| Megf8 | 0.306226817 | 0.278630958 | 0.227 | 0.173 | 1 |
| Ints6l | 0.306723903 | -0.305851559 | 0.52 | 0.543 | 1 |
| Syt14 | 0.307170641 | -0.355126569 | 0.293 | 0.346 | 1 |
| Gon4l | 0.310885204 | -0.357785798 | 0.32 | 0.37 | 1 |
| Megf10 | 0.311276606 | 0.317198778 | 0.387 | 0.333 | 1 |
| Kantr | 0.314100238 | 0.269340035 | 0.32 | 0.259 | 1 |
| Neu1 | 0.314636566 | 0.275825498 | 0.12 | 0.074 | 1 |
| Padi2 | 0.315348965 | -0.289471244 | 0.293 | 0.358 | 1 |
| Papd4 | 0.315930044 | -0.317833661 | 0.373 | 0.432 | 1 |
| 9130011E15Rik | 0.316161789 | -0.264412545 | 0.4 | 0.432 | 1 |
| N4bp2l1 | 0.316922751 | 0.255607413 | 0.173 | 0.123 | 1 |
| Whrn | 0.31762375 | -0.319174057 | 0.187 | 0.247 | 1 |
| Traf3 | 0.31801762 | -0.303137409 | 0.413 | 0.457 | 1 |
| Lrrtm3 | 0.318770969 | -0.373472224 | 0.507 | 0.531 | 1 |
| Adam23 | 0.325879114 | -0.306545445 | 0.173 | 0.222 | 1 |
| Cdh8 | 0.326060025 | -0.275076896 | 0.24 | 0.309 | 1 |
| Sp3 | 0.326682042 | 0.332455999 | 0.413 | 0.346 | 1 |
| Ppp2r2b | 0.326827444 | -0.308716758 | 0.787 | 0.778 | 1 |
| Galntl6 | 0.327637321 | -0.868415167 | 0.4 | 0.407 | 1 |
| Raver2 | 0.327859315 | -0.255488909 | 0.333 | 0.395 | 1 |
| Lhfpl3 | 0.328392074 | -0.253918706 | 0.24 | 0.16 | 1 |
| Zfp536 | 0.32931316 | -0.273338759 | 0.2 | 0.259 | 1 |
| Arhgap26 | 0.329406496 | -0.260504189 | 0.227 | 0.284 | 1 |
| Nrg3 | 0.329959839 | -0.393694768 | 0.707 | 0.556 | 1 |
| Chchd10 | 0.334055823 | 0.268837356 | 0.4 | 0.37 | 1 |
| 5730480H06Rik | 0.335478697 | -0.31009491 | 0.387 | 0.407 | 1 |
| Phyhipl | 0.335992375 | -0.269628744 | 0.227 | 0.296 | 1 |
| Unc5c | 0.336375752 | -0.390483002 | 0.267 | 0.333 | 1 |
| Cap2 | 0.339673236 | -0.275870132 | 0.307 | 0.333 | 1 |
| Asap2 | 0.340171684 | -0.2568674 | 0.373 | 0.395 | 1 |
| Cdh20 | 0.340458041 | -0.333131274 | 0.08 | 0.123 | 1 |
| Rb1cc1 | 0.340862075 | -0.29060742 | 0.44 | 0.457 | 1 |
| Heg1 | 0.341116066 | 0.265794904 | 0.48 | 0.407 | 1 |
| Lamtor5 | 0.341117821 | -0.33570677 | 0.133 | 0.173 | 1 |
| Ulk2 | 0.341240846 | -0.335027117 | 0.64 | 0.679 | 1 |
| Cfl2 | 0.342233872 | -0.273633262 | 0.133 | 0.185 | 1 |
| Kcnab1 | 0.343679343 | -0.55021641 | 0.373 | 0.432 | 1 |
| Gm10754 | 0.346077983 | -0.254383083 | 0.187 | 0.259 | 1 |
| Ep300 | 0.346123011 | -0.289589122 | 0.44 | 0.481 | 1 |
| Scn2a | 0.346671415 | -0.27729943 | 0.373 | 0.42 | 1 |
| Stat5b | 0.347093491 | -0.32242878 | 0.307 | 0.346 | 1 |
| Serinc1 | 0.347618494 | -0.340576096 | 0.507 | 0.58 | 1 |
| Ccdc122 | 0.349279666 | -0.352044057 | 0.307 | 0.346 | 1 |
| Tmtc4 | 0.352918863 | -0.375024706 | 0.187 | 0.235 | 1 |
| Acsbg1 | 0.354908145 | -0.277128254 | 0.107 | 0.148 | 1 |
| Ptprd | 0.356193733 | -0.340725378 | 0.92 | 0.889 | 1 |
| Aebp2 | 0.356516616 | -0.277161061 | 0.28 | 0.321 | 1 |
| Ahi1 | 0.356756582 | -0.261207059 | 0.667 | 0.716 | 1 |
| 9530059O14Rik | 0.358586793 | -0.535455098 | 0.133 | 0.173 | 1 |
| Trim9 | 0.360183546 | -0.294058156 | 0.453 | 0.494 | 1 |
| Rgs17 | 0.360547146 | -0.25413688 | 0.093 | 0.136 | 1 |
| Egfem1 | 0.360695973 | -0.598496381 | 0.187 | 0.235 | 1 |
| Gm28727 | 0.365202386 | 0.2560891 | 0.307 | 0.247 | 1 |
| Thsd7a | 0.366472599 | -0.614904037 | 0.413 | 0.407 | 1 |
| Rbp1 | 0.36681108 | -0.27827138 | 0.173 | 0.21 | 1 |
| Tox2 | 0.367777715 | 0.318553039 | 0.467 | 0.407 | 1 |
| Rgl2 | 0.367936605 | 0.272786013 | 0.28 | 0.222 | 1 |
| Fitm2 | 0.369838033 | -0.363027816 | 0.12 | 0.16 | 1 |
| Dclk1 | 0.371326629 | -0.361175064 | 0.64 | 0.568 | 1 |
| Mxi1 | 0.371575064 | -0.28874436 | 0.587 | 0.654 | 1 |
| Dnajc21 | 0.376002552 | -0.260728583 | 0.147 | 0.185 | 1 |
| Grin2a | 0.376225386 | -0.297822593 | 0.333 | 0.235 | 1 |
| Gm32647 | 0.377176408 | -0.669122398 | 0.133 | 0.185 | 1 |
| Sgcd | 0.377618704 | -0.290224034 | 0.573 | 0.605 | 1 |
| Cacul1 | 0.378476993 | -0.279172474 | 0.213 | 0.272 | 1 |
| Gpc4 | 0.379052312 | -0.261724318 | 0.32 | 0.37 | 1 |
| Cnot2 | 0.379495958 | -0.26121318 | 0.493 | 0.531 | 1 |
| Trhde | 0.380733736 | 0.331093943 | 0.453 | 0.407 | 1 |
| Ghr | 0.382278635 | -0.284421393 | 0.267 | 0.321 | 1 |
| Caln1 | 0.383127738 | -0.449052239 | 0.32 | 0.358 | 1 |
| Rbm25 | 0.385491997 | -0.271407192 | 0.813 | 0.765 | 1 |
| Fgf12 | 0.38717694 | -0.366787555 | 0.267 | 0.309 | 1 |
| Stxbp5 | 0.391503831 | -0.258120668 | 0.4 | 0.457 | 1 |
| Olfm3 | 0.392044478 | -0.345763983 | 0.133 | 0.173 | 1 |
| Gm9925 | 0.393608019 | -0.278675675 | 0.133 | 0.173 | 1 |
| Nceh1 | 0.394382947 | -0.345570292 | 0.427 | 0.444 | 1 |
| Gm45881 | 0.39538819 | -0.264907186 | 0.12 | 0.16 | 1 |
| Hdac1 | 0.401938641 | -0.271973607 | 0.12 | 0.16 | 1 |
| Rp9 | 0.405286332 | -0.270900171 | 0.32 | 0.358 | 1 |
| Hpgds | 0.407667216 | 0.307669852 | 0.133 | 0.099 | 1 |
| Cacna1e | 0.408565497 | -0.365066114 | 0.373 | 0.407 | 1 |
| Kalrn | 0.409654082 | -0.421234305 | 0.347 | 0.37 | 1 |
| Abhd2 | 0.411351241 | -0.292640936 | 0.28 | 0.321 | 1 |
| Lrrc4c | 0.415545279 | -0.785045085 | 0.747 | 0.778 | 1 |
| Cntn1 | 0.418099205 | -0.28196114 | 0.413 | 0.444 | 1 |
| Herc6 | 0.420603118 | -0.278773426 | 0.2 | 0.235 | 1 |
| P4ha1 | 0.421538099 | -0.282097737 | 0.453 | 0.494 | 1 |
| Dlgap1 | 0.42154595 | -0.536325798 | 0.653 | 0.617 | 1 |
| Nme7 | 0.422891088 | -0.260623594 | 0.573 | 0.605 | 1 |
| Map2k6 | 0.426190376 | -0.291835877 | 0.52 | 0.568 | 1 |
| Pls3 | 0.429730447 | 0.250502166 | 0.187 | 0.148 | 1 |
| Rps23 | 0.43312614 | -0.297621313 | 0.173 | 0.21 | 1 |
| Dars | 0.439576858 | -0.341544272 | 0.347 | 0.358 | 1 |
| Zfp266 | 0.440885046 | -0.33184176 | 0.307 | 0.333 | 1 |
| Ttc26 | 0.44223984 | -0.286422983 | 0.48 | 0.494 | 1 |
| Tns3 | 0.442970356 | -0.393278927 | 0.28 | 0.296 | 1 |
| Ccdc78 | 0.443705534 | 0.300862722 | 0.427 | 0.358 | 1 |
| Rbm42 | 0.445568382 | -0.30654762 | 0.08 | 0.111 | 1 |
| Supt16 | 0.448260777 | 0.36592673 | 0.307 | 0.272 | 1 |
| Mmp16 | 0.448374718 | -0.266171385 | 0.613 | 0.679 | 1 |
| Eif3h | 0.448478968 | 0.306179239 | 0.2 | 0.173 | 1 |
| Eif1 | 0.449355974 | -0.250339398 | 0.48 | 0.519 | 1 |
| Inpp4b | 0.451652324 | -0.283154091 | 0.28 | 0.309 | 1 |
| Tshz2 | 0.452432919 | 0.382205649 | 0.28 | 0.247 | 1 |
| Sema5b | 0.453053963 | 0.262628765 | 0.213 | 0.173 | 1 |
| Meg3 | 0.455242142 | -0.327794345 | 0.987 | 0.914 | 1 |
| Tomm70a | 0.457964849 | -0.267790868 | 0.24 | 0.284 | 1 |
| Zfp157 | 0.461079712 | -0.251908948 | 0.227 | 0.272 | 1 |
| E130006D01Rik | 0.461157341 | 0.258632998 | 0.2 | 0.16 | 1 |
| Map7 | 0.462007314 | -0.277774071 | 0.32 | 0.358 | 1 |
| Spata1 | 0.464068133 | -0.473500743 | 0.307 | 0.333 | 1 |
| Pom121 | 0.466007875 | -0.254034192 | 0.16 | 0.198 | 1 |
| Ccdc151 | 0.467333375 | -0.384677976 | 0.293 | 0.321 | 1 |
| Phf2 | 0.471338432 | -0.334938802 | 0.2 | 0.222 | 1 |
| Iqch | 0.472230924 | 0.321056763 | 0.547 | 0.519 | 1 |
| Fgf13 | 0.472505248 | -0.327856906 | 0.213 | 0.247 | 1 |
| Nploc4 | 0.472620557 | 0.252784364 | 0.267 | 0.222 | 1 |
| Brk1 | 0.478543056 | -0.268566666 | 0.28 | 0.309 | 1 |
| Mgat4c | 0.482234852 | -0.416882678 | 0.373 | 0.395 | 1 |
| Celf4 | 0.48462729 | -0.340150873 | 0.467 | 0.457 | 1 |
| Nppc | 0.484699502 | 0.267285599 | 0.213 | 0.173 | 1 |
| Lmo7 | 0.487043791 | -0.257665159 | 0.467 | 0.457 | 1 |
| Snap47 | 0.488495258 | -0.27305753 | 0.267 | 0.296 | 1 |
| Rars2 | 0.489927115 | 0.307994978 | 0.32 | 0.284 | 1 |
| Tcf20 | 0.492614646 | -0.267171759 | 0.533 | 0.568 | 1 |
| Il1rapl2 | 0.492857848 | -0.828631446 | 0.12 | 0.16 | 1 |
| Cdh11 | 0.504872394 | -0.263577076 | 0.187 | 0.21 | 1 |
| Ryk | 0.509105676 | -0.351725912 | 0.28 | 0.309 | 1 |
| Gpr158 | 0.509776757 | -0.310872712 | 0.267 | 0.296 | 1 |
| Gria3 | 0.512216758 | -0.411411776 | 0.333 | 0.333 | 1 |
| Dscam | 0.514577365 | -0.568315879 | 0.12 | 0.148 | 1 |
| Slit3 | 0.515798 | -0.322669425 | 0.187 | 0.136 | 1 |
| Srrm2 | 0.518514054 | 0.25340117 | 0.68 | 0.679 | 1 |
| Rab5c | 0.521268665 | -0.409350011 | 0.187 | 0.21 | 1 |
| Epha5 | 0.521715921 | -0.294301789 | 0.467 | 0.481 | 1 |
| St3gal4 | 0.521971253 | -0.288352884 | 0.16 | 0.185 | 1 |
| Ccser2 | 0.532839417 | -0.2512741 | 0.32 | 0.346 | 1 |
| Bbs4 | 0.53463193 | -0.279069335 | 0.2 | 0.222 | 1 |
| Ntm | 0.537621081 | -0.641488788 | 0.507 | 0.506 | 1 |
| Tmem243 | 0.540557105 | -0.257551247 | 0.453 | 0.506 | 1 |
| Nrp2 | 0.543264154 | -0.307031181 | 0.213 | 0.247 | 1 |
| Spin1 | 0.546033381 | 0.26800726 | 0.333 | 0.309 | 1 |
| Arih2 | 0.54745787 | -0.295113234 | 0.32 | 0.321 | 1 |
| Cntn4 | 0.551046044 | -0.528277231 | 0.333 | 0.333 | 1 |
| Rgcc | 0.553493997 | -0.30535754 | 0.213 | 0.235 | 1 |
| Lrmda | 0.553545884 | -0.524913241 | 0.24 | 0.259 | 1 |
| Spock3 | 0.554528924 | -0.251239285 | 0.653 | 0.617 | 1 |
| Nkain3 | 0.554734307 | -0.38778442 | 0.173 | 0.198 | 1 |
| Cdh7 | 0.559583288 | 0.272298486 | 0.467 | 0.407 | 1 |
| Slc17a5 | 0.561146386 | -0.317383356 | 0.267 | 0.284 | 1 |
| Rchy1 | 0.56115861 | -0.362674971 | 0.16 | 0.185 | 1 |
| Gm11266 | 0.561285281 | -0.347047896 | 0.293 | 0.284 | 1 |
| Brinp1 | 0.567427792 | -0.351886628 | 0.227 | 0.235 | 1 |
| Nlk | 0.568746328 | 0.271656965 | 0.507 | 0.457 | 1 |
| Wsb1 | 0.569817073 | -0.297021154 | 0.333 | 0.358 | 1 |
| Fgfr1 | 0.572550311 | -0.289938715 | 0.587 | 0.593 | 1 |
| Pde4b | 0.573708201 | -0.506869318 | 0.467 | 0.37 | 1 |
| Ptms | 0.576209539 | -0.283913178 | 0.387 | 0.383 | 1 |
| Got1 | 0.577534363 | 0.282104733 | 0.267 | 0.247 | 1 |
| Anks1b | 0.582805594 | -0.370045896 | 0.813 | 0.852 | 1 |
| Htr2c | 0.586466002 | -0.306508734 | 0.213 | 0.235 | 1 |
| 1700020G17Rik | 0.590779545 | 0.328178622 | 0.12 | 0.099 | 1 |
| Grm7 | 0.590783622 | -0.566928759 | 0.493 | 0.481 | 1 |
| Spice1 | 0.59161629 | -0.268369492 | 0.36 | 0.37 | 1 |
| Plcl1 | 0.597056054 | 0.259649072 | 0.44 | 0.432 | 1 |
| Ntng1 | 0.598773682 | -0.310406038 | 0.12 | 0.148 | 1 |
| Mid1 | 0.603831509 | -0.255585807 | 0.373 | 0.383 | 1 |
| Elavl3 | 0.608460761 | 0.289623266 | 0.2 | 0.173 | 1 |
| Reln | 0.61300346 | 0.250849613 | 0.187 | 0.16 | 1 |
| Dach1 | 0.615646689 | -0.358971317 | 0.307 | 0.346 | 1 |
| Clta | 0.617374574 | -0.280942272 | 0.293 | 0.296 | 1 |
| Spock1 | 0.617670138 | -0.373841633 | 0.24 | 0.259 | 1 |
| Psmb2 | 0.627243863 | -0.42388325 | 0.36 | 0.358 | 1 |
| Caskin1 | 0.63386437 | -0.269454461 | 0.12 | 0.136 | 1 |
| Dgki | 0.636375049 | -0.254758733 | 0.36 | 0.37 | 1 |
| Slc33a1 | 0.637560766 | -0.267854932 | 0.213 | 0.235 | 1 |
| Rgs7 | 0.641225706 | -0.269355444 | 0.427 | 0.444 | 1 |
| Dpp6 | 0.642816007 | -0.495798142 | 0.467 | 0.469 | 1 |
| Trmt1l | 0.64397002 | -0.253124473 | 0.547 | 0.543 | 1 |
| Slk | 0.653269888 | -0.250223675 | 0.347 | 0.346 | 1 |
| Dpy19l4 | 0.674505581 | -0.289099729 | 0.347 | 0.346 | 1 |
| Invs | 0.680072987 | -0.302604859 | 0.427 | 0.42 | 1 |
| Galnt13 | 0.689698171 | -0.419243979 | 0.48 | 0.506 | 1 |
| Slc1a2 | 0.690825942 | -0.424902429 | 0.613 | 0.556 | 1 |
| Sema5a | 0.696232946 | -0.352433815 | 0.213 | 0.222 | 1 |
| Unc5d | 0.704513173 | -0.367595403 | 0.4 | 0.395 | 1 |
| Trpm3 | 0.720091157 | -0.326563954 | 0.507 | 0.494 | 1 |
| Fyn | 0.721407017 | -0.272414038 | 0.267 | 0.272 | 1 |
| Stag1 | 0.721861525 | -0.2630398 | 0.813 | 0.802 | 1 |
| Epha6 | 0.726920114 | -0.252276886 | 0.4 | 0.321 | 1 |
| Rnf220 | 0.733762576 | 0.272379013 | 0.28 | 0.272 | 1 |
| Sned1 | 0.734820124 | -0.28731078 | 0.44 | 0.432 | 1 |
| Rpgr | 0.738651972 | 0.294203327 | 0.667 | 0.691 | 1 |
| Cacna2d1 | 0.744343841 | -0.26448382 | 0.48 | 0.469 | 1 |
| Epn2 | 0.749393182 | -0.306998459 | 0.467 | 0.469 | 1 |
| Phactr1 | 0.763569791 | -0.822482752 | 0.8 | 0.815 | 1 |
| Pik3ca | 0.769970209 | -0.280481307 | 0.413 | 0.407 | 1 |
| Prpsap1 | 0.775506268 | 0.328705189 | 0.173 | 0.173 | 1 |
| Tmem39b | 0.791333241 | -0.255173758 | 0.147 | 0.148 | 1 |
| Pde8b | 0.795865544 | -0.309992978 | 0.48 | 0.444 | 1 |
| Synpr | 0.797590767 | 0.303051891 | 0.52 | 0.543 | 1 |
| Rrm2b | 0.809280437 | -0.254574056 | 0.32 | 0.309 | 1 |
| Pcdh15 | 0.817579192 | -0.866052194 | 0.227 | 0.235 | 1 |
| Ptprt | 0.820093354 | -0.485487259 | 0.453 | 0.444 | 1 |
| Lrrc7 | 0.820499859 | -0.640821816 | 0.507 | 0.469 | 1 |
| Prtg | 0.822429361 | -0.371443517 | 0.533 | 0.494 | 1 |
| Erbb4 | 0.827896068 | -0.348052835 | 0.8 | 0.778 | 1 |
| Fam227b | 0.834237387 | -0.280464035 | 0.133 | 0.136 | 1 |
| Snhg11 | 0.843919712 | -0.369048831 | 0.747 | 0.728 | 1 |
| Pgrmc1 | 0.849161886 | -0.32903919 | 0.4 | 0.346 | 1 |
| Ssh1 | 0.861200889 | -0.285898579 | 0.227 | 0.222 | 1 |
| Sgcz | 0.86963889 | -0.658787617 | 0.627 | 0.617 | 1 |
| Prkar1b | 0.869658368 | -0.259000775 | 0.267 | 0.247 | 1 |
| Dock4 | 0.870476659 | -0.368050877 | 0.507 | 0.444 | 1 |
| Nr1i2 | 0.888129959 | -0.263020942 | 0.147 | 0.136 | 1 |
| Ryr3 | 0.888904702 | -0.410205309 | 0.293 | 0.284 | 1 |
| Stpg2 | 0.904572984 | -0.264285665 | 0.333 | 0.309 | 1 |
| Nlrc4 | 0.906130354 | -0.396894616 | 0.44 | 0.42 | 1 |
| Brinp3 | 0.913965426 | -0.442990646 | 0.227 | 0.21 | 1 |
| Xkr4 | 0.91572954 | -0.49887419 | 0.4 | 0.358 | 1 |
| Fam155a | 0.922618002 | -0.646623704 | 0.24 | 0.21 | 1 |
| Klhl29 | 0.931772234 | -0.261432093 | 0.253 | 0.222 | 1 |
| Cenpp | 0.93802041 | 0.479759701 | 0.16 | 0.16 | 1 |
| Adarb2 | 0.940271052 | 0.276385939 | 0.12 | 0.123 | 1 |
| Hip1 | 0.948592691 | -0.269911296 | 0.147 | 0.136 | 1 |
| Nxph1 | 0.961038148 | -0.95256624 | 0.133 | 0.123 | 1 |
| Dcc | 0.967798644 | -0.393092336 | 0.64 | 0.556 | 1 |
| Celf2 | 0.97028992 | -0.463586271 | 0.96 | 0.975 | 1 |
| Myt1l | 0.970781544 | -0.28430657 | 0.4 | 0.358 | 1 |
| Chsy3 | 0.978201607 | -0.301734437 | 0.173 | 0.16 | 1 |

| **Supplemental Table S4. Differentially expressed genes in each cell type generated comparing the control and the mTBI SVZ, related to Figure 2. (Endothelial DEGs)** | | | | | |
| --- | --- | --- | --- | --- | --- |
| Column1 | p_val | avg_log2FC | pct.1 | pct.2 | p_val_adj |
| Tac1 | 2.66999E-06 | -0.956551929 | 0.261 | 0.523 | 0.06064346 |
| Gm42418 | 2.87951E-06 | 0.823625261 | 1 | 0.991 | 0.065402306 |
| Dusp14 | 1.52493E-05 | -0.584537507 | 0.028 | 0.174 | 0.34635724 |
| Neat1 | 2.36109E-05 | 0.736301894 | 0.46 | 0.22 | 0.536274693 |
| Ctxn1 | 8.63743E-05 | -0.597070961 | 0.136 | 0.33 | 1 |
| Camk1d | 0.0001026 | 0.554628518 | 0.858 | 0.706 | 1 |
| Nisch | 0.00017075 | 0.482567559 | 0.551 | 0.339 | 1 |
| Chn1 | 0.000201257 | -0.585605198 | 0.58 | 0.716 | 1 |
| Ryk | 0.000262446 | 0.488334507 | 0.443 | 0.239 | 1 |
| Ptp4a3 | 0.000288442 | 0.416631288 | 0.199 | 0.046 | 1 |
| Lars2 | 0.000457265 | 0.536631824 | 0.619 | 0.422 | 1 |
| Malat1 | 0.00051431 | 0.267698446 | 1 | 1 | 1 |
| Zfp36l2 | 0.000583251 | 0.356299068 | 0.102 | 0 | 1 |
| Slit1 | 0.000642582 | -0.303678124 | 0.017 | 0.11 | 1 |
| Pnmal2 | 0.000848831 | -0.724989278 | 0.136 | 0.294 | 1 |
| Bmp6 | 0.000870358 | 1.033954682 | 0.21 | 0.064 | 1 |
| Art3 | 0.00090138 | 0.79337745 | 0.176 | 0.046 | 1 |
| Txndc17 | 0.000902848 | 0.376610208 | 0.148 | 0.028 | 1 |
| Nsg2 | 0.000930954 | -0.582844289 | 0.585 | 0.716 | 1 |
| Plppr4 | 0.000944474 | -0.630288848 | 0.477 | 0.642 | 1 |
| Gab2 | 0.00106083 | 0.806492922 | 0.585 | 0.422 | 1 |
| Plk2 | 0.001113007 | -0.421613016 | 0.25 | 0.422 | 1 |
| Egflam | 0.001121922 | 0.643585677 | 0.267 | 0.101 | 1 |
| Arf3 | 0.001197179 | -0.672758819 | 0.449 | 0.578 | 1 |
| Ncald | 0.001207885 | 0.293947883 | 0.312 | 0.138 | 1 |
| 2510039O18Rik | 0.001220709 | -0.348442107 | 0.034 | 0.138 | 1 |
| Hdac5 | 0.001269027 | 0.30356759 | 0.159 | 0.037 | 1 |
| Ppp3ca | 0.001270276 | -0.309224771 | 0.955 | 0.972 | 1 |
| Btf3l4 | 0.001330035 | 0.414824561 | 0.233 | 0.083 | 1 |
| Stx12 | 0.001351942 | 0.436659891 | 0.364 | 0.183 | 1 |
| Qpct | 0.001374462 | -0.408729097 | 0.04 | 0.147 | 1 |
| Fbxo32 | 0.001417793 | 0.428727552 | 0.227 | 0.083 | 1 |
| Snrnp70 | 0.001438017 | 0.515081024 | 0.602 | 0.468 | 1 |
| Tomm5 | 0.00155452 | 0.440363316 | 0.108 | 0.009 | 1 |
| Prr3 | 0.001604287 | 0.300935752 | 0.125 | 0.018 | 1 |
| Hmgcs2 | 0.00167384 | 0.392468673 | 0.142 | 0.028 | 1 |
| Mtss1l | 0.001936708 | 0.309298484 | 0.142 | 0.028 | 1 |
| C1qtnf4 | 0.002020945 | -0.671968695 | 0.301 | 0.486 | 1 |
| Tcf7l2 | 0.002126929 | 0.60656121 | 0.33 | 0.165 | 1 |
| Ubtd1 | 0.00225147 | 0.33386601 | 0.136 | 0.028 | 1 |
| Jup | 0.002309942 | 0.471765638 | 0.193 | 0.064 | 1 |
| Hddc2 | 0.002374462 | 0.270650284 | 0.102 | 0.009 | 1 |
| 1110034G24Rik | 0.002529598 | 0.388929147 | 0.25 | 0.11 | 1 |
| Serpine2 | 0.002763179 | -0.67471683 | 0.381 | 0.514 | 1 |
| Elovl7 | 0.00281855 | 0.290261947 | 0.381 | 0.202 | 1 |
| Hnrnpdl | 0.002889659 | 0.395800209 | 0.46 | 0.312 | 1 |
| Nol7 | 0.002892109 | 0.388482153 | 0.188 | 0.064 | 1 |
| 3110043O21Rik | 0.00298264 | 0.347155084 | 0.205 | 0.073 | 1 |
| Kdm7a | 0.003067319 | 0.414328914 | 0.472 | 0.294 | 1 |
| Col1a2 | 0.00314206 | 0.443245538 | 0.131 | 0.028 | 1 |
| Ppp2ca | 0.003222133 | -0.503575558 | 0.33 | 0.495 | 1 |
| Cbarp | 0.003313803 | -0.642591383 | 0.131 | 0.266 | 1 |
| Gna11 | 0.003507271 | 0.297370521 | 0.256 | 0.11 | 1 |
| Ezh2 | 0.003510589 | 0.414807229 | 0.284 | 0.138 | 1 |
| Timmdc1 | 0.003568156 | 0.343093201 | 0.199 | 0.073 | 1 |
| Fam155a | 0.003683439 | 0.545832482 | 0.386 | 0.22 | 1 |
| Rnf14 | 0.003733083 | 0.283281862 | 0.358 | 0.183 | 1 |
| Tpst2 | 0.003856365 | 0.257523199 | 0.193 | 0.064 | 1 |
| Aqp11 | 0.004023336 | 0.444725466 | 0.17 | 0.055 | 1 |
| Uvrag | 0.004043774 | 0.428288359 | 0.506 | 0.33 | 1 |
| Zcchc10 | 0.004234372 | 0.331448076 | 0.108 | 0.018 | 1 |
| Dpagt1 | 0.004268269 | -0.38850683 | 0.034 | 0.119 | 1 |
| Calm2 | 0.004274494 | -0.658102427 | 0.784 | 0.844 | 1 |
| Il6st | 0.004302449 | 0.423068523 | 0.312 | 0.156 | 1 |
| Txnip | 0.004335632 | 0.514705796 | 0.21 | 0.083 | 1 |
| Slco2b1 | 0.004407918 | 0.668024744 | 0.267 | 0.128 | 1 |
| Eif4g1 | 0.004414543 | 0.429059492 | 0.42 | 0.266 | 1 |
| Pbx1 | 0.004462002 | 0.363839958 | 0.795 | 0.661 | 1 |
| Lcorl | 0.004479572 | 0.322262003 | 0.58 | 0.413 | 1 |
| Gria2 | 0.004488674 | -0.339076438 | 0.852 | 0.908 | 1 |
| Fam114a2 | 0.004501924 | 0.391247984 | 0.244 | 0.11 | 1 |
| Ssfa2 | 0.004668469 | 0.359442349 | 0.261 | 0.119 | 1 |
| Snrnp200 | 0.004691346 | 0.509478585 | 0.165 | 0.055 | 1 |
| Map4k4 | 0.004724564 | 0.42008292 | 0.585 | 0.431 | 1 |
| Senp2 | 0.004967118 | 0.270802171 | 0.409 | 0.239 | 1 |
| Ckmt1 | 0.005000356 | -0.435513427 | 0.045 | 0.138 | 1 |
| 6330403K07Rik | 0.005021621 | -0.487324289 | 0.136 | 0.266 | 1 |
| Mau2 | 0.005065218 | 0.474777688 | 0.375 | 0.22 | 1 |
| Gm26848 | 0.005172185 | -0.629678093 | 0.483 | 0.587 | 1 |
| Homer1 | 0.005190735 | -0.494770772 | 0.455 | 0.569 | 1 |
| Nnat | 0.005268827 | -0.625086876 | 0.267 | 0.404 | 1 |
| Rasgrf2 | 0.005298181 | 0.30208914 | 0.108 | 0.018 | 1 |
| Smap1 | 0.005332121 | 0.337784786 | 0.432 | 0.266 | 1 |
| Nptn | 0.005340475 | -0.466605098 | 0.71 | 0.761 | 1 |
| Egr1 | 0.005916221 | -0.499534567 | 0.102 | 0.22 | 1 |
| Cmss1 | 0.006027526 | 0.603195581 | 0.909 | 0.881 | 1 |
| Rbm26 | 0.006043749 | 0.474194735 | 0.665 | 0.569 | 1 |
| Gm28055 | 0.006217174 | 0.330524258 | 0.136 | 0.037 | 1 |
| Klhl26 | 0.006314864 | 0.452511799 | 0.17 | 0.064 | 1 |
| 4930545L23Rik | 0.006366661 | -0.328571055 | 0.182 | 0.312 | 1 |
| Rhoj | 0.006462697 | 0.269956645 | 0.312 | 0.156 | 1 |
| Suds3 | 0.006477997 | 0.32625614 | 0.199 | 0.083 | 1 |
| Unc93b1 | 0.006779886 | 0.285077361 | 0.136 | 0.037 | 1 |
| Bcap31 | 0.006845744 | -0.355881364 | 0.136 | 0.257 | 1 |
| Clic4 | 0.006853947 | 0.590866694 | 0.489 | 0.367 | 1 |
| Exosc4 | 0.007143498 | 0.362897649 | 0.102 | 0.018 | 1 |
| Zfp346 | 0.007269479 | 0.490828515 | 0.318 | 0.183 | 1 |
| Slc4a4 | 0.007485094 | 0.426816359 | 0.653 | 0.505 | 1 |
| Map2k5 | 0.007521981 | 0.342981057 | 0.489 | 0.33 | 1 |
| Hcfc1 | 0.007551415 | 0.271887552 | 0.119 | 0.028 | 1 |
| Ubxn7 | 0.007670365 | 0.317896517 | 0.284 | 0.147 | 1 |
| G630016G05Rik | 0.007727751 | -0.39855939 | 0.119 | 0.239 | 1 |
| Arid1b | 0.007903325 | 0.481735523 | 0.682 | 0.523 | 1 |
| Numb | 0.007997036 | 0.345768981 | 0.568 | 0.431 | 1 |
| Purb | 0.00804774 | 0.638152595 | 0.506 | 0.385 | 1 |
| Calb1 | 0.008183228 | -0.442060698 | 0.216 | 0.358 | 1 |
| Dlgap4 | 0.008296472 | -0.38902784 | 0.347 | 0.505 | 1 |
| Abhd4 | 0.008341314 | 0.301123016 | 0.114 | 0.028 | 1 |
| Sos2 | 0.008388151 | 0.333064934 | 0.455 | 0.294 | 1 |
| Zfp704 | 0.008411492 | 0.427975063 | 0.466 | 0.33 | 1 |
| Sdk2 | 0.008420062 | 0.360571054 | 0.17 | 0.064 | 1 |
| Yipf4 | 0.008784092 | 0.265833118 | 0.301 | 0.156 | 1 |
| Mapk1 | 0.009047494 | -0.422338431 | 0.585 | 0.697 | 1 |
| Runx1t1 | 0.009068892 | -0.503211013 | 0.517 | 0.624 | 1 |
| Eif1ax | 0.009073305 | -0.350185169 | 0.045 | 0.128 | 1 |
| Sh3d19 | 0.00919952 | 0.696199529 | 0.477 | 0.339 | 1 |
| Rbm22 | 0.009410719 | 0.322082333 | 0.17 | 0.064 | 1 |
| Jak2 | 0.009559747 | 0.524290523 | 0.443 | 0.303 | 1 |
| E130307A14Rik | 0.009624499 | 0.480503587 | 0.443 | 0.312 | 1 |
| Txn1 | 0.009658111 | 0.306001594 | 0.114 | 0.028 | 1 |
| Car10 | 0.009746253 | 0.33745848 | 0.114 | 0.028 | 1 |
| Arxes2 | 0.009854067 | -0.487185768 | 0.051 | 0.138 | 1 |
| Cpd | 0.009911106 | 0.473710695 | 0.46 | 0.33 | 1 |
| Stat6 | 0.010014995 | 0.281905674 | 0.114 | 0.028 | 1 |
| Add3 | 0.010023239 | 0.407033109 | 0.608 | 0.44 | 1 |
| Gucy1a1 | 0.010035563 | 0.327775926 | 0.386 | 0.239 | 1 |
| Prr12 | 0.010169053 | 0.257915991 | 0.182 | 0.073 | 1 |
| Smg6 | 0.01047487 | 0.393944327 | 0.614 | 0.459 | 1 |
| Nr2f2 | 0.010636924 | 0.579161404 | 0.256 | 0.128 | 1 |
| Gm20388 | 0.010720288 | -0.307229741 | 0.847 | 0.835 | 1 |
| Maoa | 0.010746835 | 0.489433908 | 0.369 | 0.229 | 1 |
| Zdhhc1 | 0.010788862 | 0.350961769 | 0.193 | 0.083 | 1 |
| Mcrip1 | 0.010839061 | 0.343194069 | 0.125 | 0.037 | 1 |
| Gm13402 | 0.01089284 | -0.257551725 | 0.091 | 0.193 | 1 |
| Npc1 | 0.010986433 | 0.362088511 | 0.216 | 0.101 | 1 |
| Sparcl1 | 0.011001233 | 0.463449542 | 0.58 | 0.422 | 1 |
| Dbp | 0.011042221 | 0.369542513 | 0.409 | 0.275 | 1 |
| Kifap3 | 0.011192681 | -0.508756494 | 0.358 | 0.495 | 1 |
| Scaf1 | 0.01123922 | 0.281251738 | 0.227 | 0.11 | 1 |
| Gm44151 | 0.011376814 | -0.451643302 | 0.159 | 0.266 | 1 |
| Zufsp | 0.011439457 | 0.364978968 | 0.29 | 0.165 | 1 |
| Mt3 | 0.011585593 | -0.63299029 | 0.108 | 0.211 | 1 |
| Gm14296 | 0.011689396 | 0.294571668 | 0.148 | 0.055 | 1 |
| Tcf3 | 0.011807052 | 0.315505374 | 0.205 | 0.092 | 1 |
| Snx4 | 0.011832989 | -0.346941025 | 0.125 | 0.239 | 1 |
| Gabra1 | 0.011996325 | -0.724376433 | 0.199 | 0.312 | 1 |
| 1110019D14Rik | 0.012332033 | 0.331890941 | 0.148 | 0.055 | 1 |
| Ctr9 | 0.012377134 | 0.40462849 | 0.21 | 0.101 | 1 |
| Zfp113 | 0.012397392 | 0.296467051 | 0.108 | 0.028 | 1 |
| Ppp6r2 | 0.012436398 | 0.356877118 | 0.455 | 0.312 | 1 |
| Shisa4 | 0.012913573 | 0.282669783 | 0.188 | 0.083 | 1 |
| Sytl2 | 0.01317498 | 0.406354151 | 0.312 | 0.193 | 1 |
| Arpp21 | 0.013192078 | -0.439805762 | 0.602 | 0.679 | 1 |
| Pbxip1 | 0.013202621 | 0.332828664 | 0.108 | 0.028 | 1 |
| Fstl1 | 0.013209218 | 0.3612628 | 0.227 | 0.11 | 1 |
| Epha4 | 0.013252491 | -0.291153353 | 0.614 | 0.688 | 1 |
| Mob3b | 0.013384245 | 0.438114742 | 0.403 | 0.266 | 1 |
| Ski | 0.013440026 | 0.441891251 | 0.534 | 0.394 | 1 |
| Rpl10a | 0.013608966 | 0.41661799 | 0.148 | 0.055 | 1 |
| S100a11 | 0.013683222 | 0.26332488 | 0.108 | 0.028 | 1 |
| Fmo5 | 0.013929267 | 0.274020787 | 0.108 | 0.028 | 1 |
| Malsu1 | 0.01396615 | 0.25919375 | 0.176 | 0.073 | 1 |
| Nfatc2 | 0.01401341 | 0.258332232 | 0.17 | 0.073 | 1 |
| Oma1 | 0.014699579 | 0.310030891 | 0.136 | 0.046 | 1 |
| Cdkl5 | 0.015173038 | -0.367968573 | 0.386 | 0.505 | 1 |
| Amy1 | 0.015212487 | 0.445511214 | 0.369 | 0.239 | 1 |
| Snx13 | 0.015347224 | 0.450253226 | 0.403 | 0.284 | 1 |
| Clmp | 0.015373745 | 0.480068536 | 0.278 | 0.165 | 1 |
| Wipi1 | 0.015390873 | 0.297985904 | 0.239 | 0.119 | 1 |
| Ppargc1b | 0.015528021 | 0.450860626 | 0.33 | 0.202 | 1 |
| 6030419C18Rik | 0.015701457 | -0.427699301 | 0.057 | 0.138 | 1 |
| Tns1 | 0.015726625 | 0.477970318 | 0.449 | 0.312 | 1 |
| Gm40841 | 0.01577874 | 0.256674612 | 0.199 | 0.092 | 1 |
| Cpq | 0.015945253 | 0.516192221 | 0.256 | 0.138 | 1 |
| Yipf1 | 0.015964657 | 0.4042945 | 0.193 | 0.092 | 1 |
| Nlk | 0.015965956 | -0.436291504 | 0.545 | 0.651 | 1 |
| Lrtm1 | 0.016035156 | -0.404104052 | 0.205 | 0.321 | 1 |
| Zic1 | 0.016067863 | 0.638873115 | 0.193 | 0.092 | 1 |
| Bod1l | 0.016164005 | 0.437617573 | 0.426 | 0.312 | 1 |
| Tceal5 | 0.016186497 | -0.450090755 | 0.045 | 0.119 | 1 |
| Smad5 | 0.016186558 | 0.333628615 | 0.227 | 0.119 | 1 |
| Kank2 | 0.016268908 | 0.41985933 | 0.244 | 0.128 | 1 |
| Ifnar1 | 0.016469886 | 0.416520109 | 0.261 | 0.147 | 1 |
| Akap7 | 0.016516932 | 0.273027606 | 0.318 | 0.183 | 1 |
| Zfp266 | 0.016528413 | 0.303940481 | 0.403 | 0.266 | 1 |
| Cavin1 | 0.016627268 | 0.57344523 | 0.205 | 0.101 | 1 |
| Gclm | 0.01668812 | 0.287920319 | 0.301 | 0.165 | 1 |
| Chtf8 | 0.016735005 | 0.296607409 | 0.131 | 0.046 | 1 |
| Kctd20 | 0.016736857 | 0.380393573 | 0.222 | 0.119 | 1 |
| Hcn2 | 0.016914838 | 0.274366893 | 0.193 | 0.092 | 1 |
| Ntn1 | 0.017117153 | 0.501823403 | 0.25 | 0.138 | 1 |
| Cops3 | 0.017163303 | 0.299984905 | 0.256 | 0.138 | 1 |
| Psmd4 | 0.017408785 | 0.27718653 | 0.239 | 0.119 | 1 |
| Kndc1 | 0.01788959 | 0.368182579 | 0.239 | 0.138 | 1 |
| Pttg1ip | 0.017905873 | 0.376797961 | 0.244 | 0.138 | 1 |
| Bfar | 0.017962528 | 0.303921379 | 0.267 | 0.147 | 1 |
| Dld | 0.017988863 | -0.381872971 | 0.199 | 0.321 | 1 |
| Ciart | 0.018226726 | 0.256777321 | 0.131 | 0.046 | 1 |
| H1f0 | 0.018252514 | 0.339357411 | 0.153 | 0.064 | 1 |
| Filip1 | 0.018390184 | 0.411002824 | 0.415 | 0.275 | 1 |
| Hmgcr | 0.018433654 | -0.325310296 | 0.097 | 0.193 | 1 |
| Brf1 | 0.018444499 | 0.266108202 | 0.182 | 0.083 | 1 |
| Meis2 | 0.018575339 | -0.345564873 | 0.614 | 0.734 | 1 |
| Dctn3 | 0.018643976 | 0.367947988 | 0.153 | 0.064 | 1 |
| Rps18 | 0.018650556 | 0.278316072 | 0.102 | 0.028 | 1 |
| Aff4 | 0.018898299 | 0.335164443 | 0.608 | 0.468 | 1 |
| Itgb5 | 0.018975723 | 0.303457806 | 0.148 | 0.055 | 1 |
| Eif1 | 0.019119612 | -0.538181911 | 0.375 | 0.505 | 1 |
| Zfp24 | 0.019230204 | -0.275241214 | 0.068 | 0.156 | 1 |
| Vps13c | 0.019303359 | 0.331128345 | 0.364 | 0.229 | 1 |
| Rrbp1 | 0.019336611 | 0.599964156 | 0.29 | 0.183 | 1 |
| Map3k10 | 0.019374988 | 0.363829508 | 0.233 | 0.128 | 1 |
| Bax | 0.019376035 | -0.357655999 | 0.091 | 0.183 | 1 |
| Camk2b | 0.019454589 | -0.483913904 | 0.557 | 0.679 | 1 |
| Snx9 | 0.019567732 | 0.274134495 | 0.188 | 0.092 | 1 |
| Kmt2e | 0.019816598 | 0.363409675 | 0.71 | 0.578 | 1 |
| Dnlz | 0.020035268 | -0.333414858 | 0.034 | 0.101 | 1 |
| Atp1a2 | 0.020201497 | 0.367511671 | 0.534 | 0.367 | 1 |
| Mapkbp1 | 0.020270604 | 0.298321864 | 0.244 | 0.138 | 1 |
| Sept10 | 0.020292763 | 0.322911171 | 0.131 | 0.046 | 1 |
| Atp1b3 | 0.020355499 | 0.313618378 | 0.403 | 0.275 | 1 |
| Rtn4 | 0.020461039 | -0.273933115 | 0.659 | 0.743 | 1 |
| Wwtr1 | 0.020463204 | 0.511130482 | 0.409 | 0.303 | 1 |
| Fam20a | 0.020468451 | 0.458026905 | 0.142 | 0.055 | 1 |
| Pdgfrb | 0.020502365 | 0.320821246 | 0.324 | 0.193 | 1 |
| 9530026P05Rik | 0.020503189 | 0.430714293 | 0.511 | 0.358 | 1 |
| Hltf | 0.020834035 | 0.258455179 | 0.227 | 0.119 | 1 |
| Cdk8 | 0.020938738 | 0.419172815 | 0.562 | 0.431 | 1 |
| Lpl | 0.021117855 | -0.496302969 | 0.074 | 0.156 | 1 |
| Gm15577 | 0.02113658 | -0.261202454 | 0.08 | 0.165 | 1 |
| Pllp | 0.021197101 | 0.273916128 | 0.205 | 0.101 | 1 |
| Htr2c | 0.021224393 | -0.398300625 | 0.392 | 0.505 | 1 |
| Zbtb46 | 0.021261389 | 0.282210404 | 0.205 | 0.101 | 1 |
| Rgs5 | 0.021277756 | 0.588920347 | 0.455 | 0.303 | 1 |
| Tgfbr3 | 0.021422475 | 0.452203212 | 0.523 | 0.413 | 1 |
| Arid5b | 0.021512714 | 0.382158489 | 0.472 | 0.339 | 1 |
| Mpp1 | 0.021549888 | -0.305215894 | 0.102 | 0.202 | 1 |
| Sumf1 | 0.021566797 | -0.354881821 | 0.17 | 0.284 | 1 |
| Tdrp | 0.02160092 | 0.298232402 | 0.222 | 0.11 | 1 |
| Amotl2 | 0.021689738 | 0.273137068 | 0.142 | 0.055 | 1 |
| Cdc42ep1 | 0.021830075 | 0.422057804 | 0.176 | 0.083 | 1 |
| Zfp961 | 0.021867112 | 0.310476385 | 0.227 | 0.128 | 1 |
| Ilk | 0.021971354 | 0.354611444 | 0.176 | 0.083 | 1 |
| 1600010M07Rik | 0.021996777 | -0.401354344 | 0.21 | 0.33 | 1 |
| Gnai3 | 0.02201817 | 0.377721574 | 0.21 | 0.11 | 1 |
| Kank3 | 0.02210862 | 0.438665442 | 0.301 | 0.183 | 1 |
| Kdm2b | 0.022354672 | 0.304027549 | 0.239 | 0.128 | 1 |
| Drd1 | 0.022356761 | -0.5816155 | 0.278 | 0.394 | 1 |
| Gabarapl1 | 0.02240459 | 0.315781519 | 0.381 | 0.239 | 1 |
| Pcp4 | 0.022563778 | -0.574535785 | 0.545 | 0.642 | 1 |
| Epb41l4b | 0.022689743 | 0.357257649 | 0.176 | 0.083 | 1 |
| Cdk14 | 0.022704123 | 0.501750638 | 0.443 | 0.303 | 1 |
| Magi3 | 0.022984055 | 0.378411307 | 0.568 | 0.45 | 1 |
| Pcbp2 | 0.023034369 | 0.282308391 | 0.574 | 0.431 | 1 |
| Slc9a6 | 0.023124276 | 0.295157114 | 0.165 | 0.073 | 1 |
| Atp2b2 | 0.023152032 | -0.317792603 | 0.568 | 0.679 | 1 |
| Olfm3 | 0.023195534 | -0.46455569 | 0.222 | 0.33 | 1 |
| Acot13 | 0.023266463 | -0.255376112 | 0.091 | 0.183 | 1 |
| Tmcc3 | 0.023359403 | 0.428083345 | 0.483 | 0.367 | 1 |
| Rab11fip2 | 0.023520582 | 0.287146032 | 0.426 | 0.303 | 1 |
| Tpm3 | 0.023568223 | 0.374480231 | 0.386 | 0.257 | 1 |
| Lrmda | 0.023633191 | 0.604742668 | 0.25 | 0.138 | 1 |
| Spon1 | 0.023724748 | 0.327771074 | 0.114 | 0.037 | 1 |
| Fa2h | 0.023798113 | 0.416764384 | 0.335 | 0.229 | 1 |
| Kcnq5 | 0.023994498 | -0.306555875 | 0.761 | 0.844 | 1 |
| Chmp2a | 0.024109986 | -0.307575907 | 0.085 | 0.174 | 1 |
| Elmod1 | 0.024131813 | -0.431412376 | 0.545 | 0.67 | 1 |
| Ing3 | 0.024251738 | 0.280188592 | 0.136 | 0.055 | 1 |
| March2 | 0.024366442 | 0.477169805 | 0.364 | 0.257 | 1 |
| Itga9 | 0.024607563 | 0.361773213 | 0.222 | 0.119 | 1 |
| Asb8 | 0.024732172 | 0.276040797 | 0.176 | 0.083 | 1 |
| Tmem183a | 0.024776949 | 0.288656096 | 0.153 | 0.064 | 1 |
| Galnt1 | 0.02496881 | 0.35731373 | 0.381 | 0.275 | 1 |
| AC162302.1 | 0.024993058 | 0.29066916 | 0.312 | 0.202 | 1 |
| Nek7 | 0.025009216 | 0.295148214 | 0.403 | 0.284 | 1 |
| Gabra4 | 0.025104482 | -0.531700045 | 0.358 | 0.468 | 1 |
| Adamtsl1 | 0.025261119 | 0.374616299 | 0.233 | 0.138 | 1 |
| Sparc | 0.025273773 | 0.310502594 | 0.381 | 0.257 | 1 |
| Pak3 | 0.025443568 | -0.465961872 | 0.381 | 0.477 | 1 |
| Rnls | 0.025480499 | 0.288383127 | 0.125 | 0.046 | 1 |
| Atp5l | 0.02596084 | 0.263298455 | 0.273 | 0.156 | 1 |
| 2900097C17Rik | 0.025998084 | -0.450374571 | 0.415 | 0.541 | 1 |
| G2e3 | 0.026027867 | -0.479314091 | 0.097 | 0.183 | 1 |
| Cggbp1 | 0.026263142 | 0.47169712 | 0.182 | 0.092 | 1 |
| Polr1d | 0.026334905 | 0.281417476 | 0.148 | 0.064 | 1 |
| Runx2 | 0.026369163 | 0.328539776 | 0.165 | 0.073 | 1 |
| Iffo1 | 0.026378391 | 0.325660232 | 0.193 | 0.101 | 1 |
| Pros1 | 0.026429141 | 0.280362223 | 0.176 | 0.083 | 1 |
| Atp5b | 0.026492655 | -0.435451799 | 0.352 | 0.477 | 1 |
| Lama2 | 0.026654511 | 0.326330506 | 0.466 | 0.321 | 1 |
| Osmr | 0.026824559 | 0.373562585 | 0.205 | 0.101 | 1 |
| Myo1e | 0.026911899 | 0.298572472 | 0.369 | 0.239 | 1 |
| Slu7 | 0.027084014 | -0.497364083 | 0.062 | 0.138 | 1 |
| Kat6a | 0.027174049 | 0.345754674 | 0.466 | 0.33 | 1 |
| Srsf1 | 0.027206333 | 0.269187059 | 0.443 | 0.303 | 1 |
| Baz1a | 0.02724927 | 0.272503803 | 0.148 | 0.064 | 1 |
| Agbl4 | 0.027264368 | 0.451283693 | 0.409 | 0.294 | 1 |
| Phactr2 | 0.027293752 | 0.35520818 | 0.358 | 0.239 | 1 |
| Dab2ip | 0.027518319 | 0.352089222 | 0.432 | 0.312 | 1 |
| Csnk1g2 | 0.027632127 | 0.34353843 | 0.25 | 0.138 | 1 |
| Tln2 | 0.027830402 | 0.264073716 | 0.511 | 0.367 | 1 |
| Paxbp1 | 0.027836739 | 0.261892379 | 0.42 | 0.312 | 1 |
| Abcf1 | 0.027863821 | 0.281016113 | 0.222 | 0.119 | 1 |
| 2310022B05Rik | 0.028190901 | 0.261529513 | 0.148 | 0.064 | 1 |
| Myl9 | 0.028376988 | 0.543991008 | 0.136 | 0.055 | 1 |
| Aatk | 0.028445154 | 0.287801864 | 0.42 | 0.294 | 1 |
| Chd4 | 0.028573293 | 0.369327603 | 0.562 | 0.468 | 1 |
| Tbce | 0.028686345 | 0.289201271 | 0.364 | 0.248 | 1 |
| Phyhip | 0.028770527 | -0.364666541 | 0.062 | 0.138 | 1 |
| Slc16a2 | 0.028795265 | 0.384306002 | 0.409 | 0.294 | 1 |
| Plppr5 | 0.028873051 | -0.300335359 | 0.222 | 0.321 | 1 |
| Tns3 | 0.028905485 | 0.321983872 | 0.239 | 0.138 | 1 |
| Fam134b | 0.028920875 | -0.551644091 | 0.324 | 0.431 | 1 |
| Prickle1 | 0.028955915 | 0.304108921 | 0.648 | 0.514 | 1 |
| Nipsnap1 | 0.028982226 | -0.31221163 | 0.114 | 0.211 | 1 |
| Mrvi1 | 0.029054337 | 0.358750756 | 0.165 | 0.073 | 1 |
| Rorb | 0.029123401 | -0.383451651 | 0.085 | 0.174 | 1 |
| Fam241a | 0.029201227 | 0.347745918 | 0.199 | 0.101 | 1 |
| Gapvd1 | 0.029459683 | 0.276600418 | 0.534 | 0.404 | 1 |
| 1810030O07Rik | 0.029547877 | 0.409656793 | 0.108 | 0.037 | 1 |
| Rsf1os1 | 0.029791796 | -0.445487014 | 0.148 | 0.239 | 1 |
| Crtc3 | 0.029859961 | 0.418664508 | 0.403 | 0.294 | 1 |
| Pip5k1a | 0.029915667 | 0.252131498 | 0.392 | 0.275 | 1 |
| Gstz1 | 0.029940926 | 0.250367591 | 0.176 | 0.083 | 1 |
| 1700111E14Rik | 0.029949228 | -0.437181693 | 0.199 | 0.294 | 1 |
| Pip5k1c | 0.030135776 | 0.251773412 | 0.227 | 0.128 | 1 |
| Ptgds | 0.030259943 | -0.408686854 | 0.085 | 0.165 | 1 |
| 4930555F03Rik | 0.030283194 | -0.296426573 | 0.057 | 0.128 | 1 |
| Tcerg1 | 0.030601701 | -0.261372785 | 0.216 | 0.321 | 1 |
| Ktn1 | 0.030883016 | 0.308487722 | 0.523 | 0.394 | 1 |
| Apc | 0.03097976 | 0.334903882 | 0.648 | 0.55 | 1 |
| Slc20a2 | 0.031178177 | 0.267342656 | 0.324 | 0.211 | 1 |
| Cobll1 | 0.031196825 | 0.46004224 | 0.597 | 0.495 | 1 |
| Syndig1 | 0.031295097 | -0.33058401 | 0.312 | 0.431 | 1 |
| Rdx | 0.031371292 | 0.302408014 | 0.443 | 0.321 | 1 |
| Wipf2 | 0.031529615 | -0.349647768 | 0.188 | 0.294 | 1 |
| Hspa8 | 0.031665653 | -0.564813576 | 0.494 | 0.615 | 1 |
| Arvcf | 0.031720186 | 0.327485136 | 0.108 | 0.037 | 1 |
| Trp53inp2 | 0.031909424 | 0.336717153 | 0.182 | 0.092 | 1 |
| Ddx50 | 0.03197931 | 0.366041503 | 0.54 | 0.431 | 1 |
| Zmiz1 | 0.032067509 | 0.458293836 | 0.398 | 0.303 | 1 |
| Zfp804b | 0.032177132 | 0.441140833 | 0.119 | 0.046 | 1 |
| Gcnt2 | 0.032377338 | 0.275499356 | 0.477 | 0.349 | 1 |
| Hlf | 0.03254817 | 0.493031159 | 0.5 | 0.394 | 1 |
| A4galt | 0.032646404 | 0.379723232 | 0.233 | 0.128 | 1 |
| Nr4a1 | 0.03265352 | -0.435026746 | 0.051 | 0.119 | 1 |
| Ccdc12 | 0.032664159 | 0.381669266 | 0.295 | 0.193 | 1 |
| AC149090.1 | 0.032715904 | 0.271929826 | 0.358 | 0.248 | 1 |
| Tsen2 | 0.032773418 | 0.273323807 | 0.176 | 0.092 | 1 |
| Foxf2 | 0.032906526 | 0.30341476 | 0.159 | 0.073 | 1 |
| Rnf220 | 0.033070959 | 0.504218607 | 0.528 | 0.45 | 1 |
| Tanc1 | 0.033360608 | 0.438430777 | 0.403 | 0.275 | 1 |
| Med13 | 0.033664393 | 0.253323055 | 0.562 | 0.404 | 1 |
| Cmtm4 | 0.033839761 | -0.33080555 | 0.097 | 0.183 | 1 |
| Creb5 | 0.034038126 | 0.417186163 | 0.278 | 0.183 | 1 |
| Epha6 | 0.03444326 | -0.271425602 | 0.545 | 0.688 | 1 |
| Focad | 0.034553677 | 0.43106232 | 0.597 | 0.495 | 1 |
| Dicer1 | 0.034714786 | 0.302914661 | 0.386 | 0.275 | 1 |
| Rilpl2 | 0.034946107 | -0.252144598 | 0.045 | 0.11 | 1 |
| Fgd6 | 0.03494712 | 0.450365966 | 0.165 | 0.083 | 1 |
| Tdrd7 | 0.034997944 | 0.293429598 | 0.33 | 0.211 | 1 |
| Gli3 | 0.03531157 | 0.327958272 | 0.182 | 0.092 | 1 |
| Spr | 0.035346866 | 0.290776312 | 0.102 | 0.037 | 1 |
| Gprc5c | 0.035371122 | 0.272304798 | 0.108 | 0.037 | 1 |
| Ss18 | 0.035401433 | 0.4152604 | 0.324 | 0.22 | 1 |
| Rnd3 | 0.035563601 | -0.286615642 | 0.057 | 0.128 | 1 |
| R3hdm2 | 0.035601323 | 0.267250671 | 0.54 | 0.404 | 1 |
| Ubl7 | 0.036084018 | 0.314762128 | 0.153 | 0.073 | 1 |
| Parp12 | 0.036476849 | 0.30543738 | 0.131 | 0.055 | 1 |
| B3galt2 | 0.036692703 | -0.471164885 | 0.08 | 0.156 | 1 |
| Rnf217 | 0.036711315 | 0.306663385 | 0.244 | 0.138 | 1 |
| Sec31a | 0.036942287 | 0.261165919 | 0.312 | 0.202 | 1 |
| Sbno2 | 0.03716578 | 0.371750488 | 0.165 | 0.083 | 1 |
| Btg3 | 0.037181026 | 0.299146713 | 0.205 | 0.11 | 1 |
| Bach1 | 0.037240636 | 0.332056664 | 0.131 | 0.055 | 1 |
| Cald1 | 0.037972695 | 0.364382986 | 0.494 | 0.349 | 1 |
| Hace1 | 0.038150736 | 0.378235261 | 0.398 | 0.321 | 1 |
| Shank2 | 0.038404261 | 0.385041629 | 0.318 | 0.211 | 1 |
| Atg13 | 0.038465533 | 0.255103882 | 0.25 | 0.147 | 1 |
| Dysf | 0.038565951 | 0.304700048 | 0.182 | 0.092 | 1 |
| Fam76a | 0.038697697 | 0.357960671 | 0.358 | 0.248 | 1 |
| Phf2 | 0.038825415 | -0.516913545 | 0.148 | 0.229 | 1 |
| Nktr | 0.038908735 | 0.341239649 | 0.591 | 0.468 | 1 |
| Qk | 0.03906436 | 0.317653209 | 0.852 | 0.725 | 1 |
| Bcas3 | 0.0390805 | 0.395466994 | 0.739 | 0.615 | 1 |
| Gm19951 | 0.039556942 | 0.253998591 | 0.17 | 0.083 | 1 |
| Fam234b | 0.039863808 | -0.344553212 | 0.125 | 0.211 | 1 |
| 9630028H03Rik | 0.039879807 | -0.347896003 | 0.318 | 0.422 | 1 |
| Copb2 | 0.0399765 | 0.255826 | 0.193 | 0.101 | 1 |
| Wls | 0.040125334 | 0.265460384 | 0.358 | 0.239 | 1 |
| Cers4 | 0.04039959 | 0.28067384 | 0.318 | 0.202 | 1 |
| Zfhx3 | 0.040467349 | 0.314369127 | 0.54 | 0.431 | 1 |
| Stard7 | 0.040591311 | -0.323262069 | 0.182 | 0.284 | 1 |
| Zc3h6 | 0.040607632 | 0.258176081 | 0.335 | 0.22 | 1 |
| Snx18 | 0.040638353 | 0.267924943 | 0.182 | 0.092 | 1 |
| Sin3a | 0.040672958 | -0.380588818 | 0.21 | 0.312 | 1 |
| Cntnap3 | 0.04122957 | -0.328158516 | 0.176 | 0.275 | 1 |
| Tmem39a | 0.041267455 | 0.264574138 | 0.131 | 0.055 | 1 |
| Lamb2 | 0.041461988 | 0.367807501 | 0.165 | 0.083 | 1 |
| Anapc1 | 0.041598937 | 0.258654428 | 0.33 | 0.22 | 1 |
| Clmn | 0.041629379 | 0.251921425 | 0.324 | 0.211 | 1 |
| Cox6a1 | 0.041693843 | -0.567822964 | 0.159 | 0.248 | 1 |
| Ptpn1 | 0.041728059 | 0.358590592 | 0.307 | 0.202 | 1 |
| Eefsec | 0.041816693 | 0.259492114 | 0.318 | 0.22 | 1 |
| Ddx6 | 0.041885895 | 0.306239325 | 0.551 | 0.404 | 1 |
| Mrps25 | 0.042183576 | -0.355750238 | 0.08 | 0.156 | 1 |
| Tmem56 | 0.042217426 | 0.260523807 | 0.165 | 0.083 | 1 |
| Degs2 | 0.042290503 | 0.296997529 | 0.176 | 0.092 | 1 |
| Pou6f2 | 0.042323154 | 0.300091575 | 0.142 | 0.064 | 1 |
| Map4k2 | 0.042553245 | 0.306123064 | 0.244 | 0.147 | 1 |
| Cdip1 | 0.042928177 | -0.345204896 | 0.33 | 0.45 | 1 |
| Zfr | 0.043231747 | -0.326739999 | 0.636 | 0.706 | 1 |
| Ywhae | 0.043748468 | -0.404619816 | 0.562 | 0.633 | 1 |
| Actr2 | 0.043889776 | -0.497146395 | 0.42 | 0.523 | 1 |
| Rora | 0.04394432 | 0.429105376 | 0.869 | 0.853 | 1 |
| Cmc1 | 0.044450865 | 0.291866313 | 0.136 | 0.064 | 1 |
| Celf4 | 0.04451013 | -0.386965129 | 0.46 | 0.532 | 1 |
| Cacnb4 | 0.045191458 | -0.296862762 | 0.511 | 0.615 | 1 |
| Zmat4 | 0.045203873 | 0.37630148 | 0.239 | 0.147 | 1 |
| Atp6ap2 | 0.045722364 | -0.508564148 | 0.29 | 0.394 | 1 |
| Slc7a8 | 0.045806159 | -0.257877675 | 0.148 | 0.239 | 1 |
| Ctdsp2 | 0.045854241 | 0.31392361 | 0.256 | 0.156 | 1 |
| Gabra2 | 0.045916131 | -0.378962991 | 0.438 | 0.532 | 1 |
| Gm12905 | 0.04591949 | -0.312992102 | 0.08 | 0.156 | 1 |
| Vstm2l | 0.046261831 | -0.511341743 | 0.148 | 0.229 | 1 |
| Rgs3 | 0.046413682 | 0.286134937 | 0.278 | 0.174 | 1 |
| Pan2 | 0.047247638 | 0.308562604 | 0.199 | 0.11 | 1 |
| Fam98a | 0.047375837 | 0.252176023 | 0.102 | 0.037 | 1 |
| Trnp1 | 0.047444272 | 0.401595051 | 0.17 | 0.092 | 1 |
| Kif13a | 0.047544511 | 0.323754287 | 0.477 | 0.376 | 1 |
| Rnf24 | 0.047718843 | -0.294784777 | 0.108 | 0.193 | 1 |
| Nrg3os | 0.047854335 | -0.32656902 | 0.153 | 0.239 | 1 |
| Upf2 | 0.047994974 | 0.320039403 | 0.381 | 0.275 | 1 |
| 5730522E02Rik | 0.048204806 | 0.37936844 | 0.517 | 0.394 | 1 |
| Amph | 0.048222194 | 0.409608813 | 0.381 | 0.294 | 1 |
| Mfn2 | 0.048243629 | 0.281014869 | 0.216 | 0.128 | 1 |
| Col4a3bp | 0.048424055 | 0.320228237 | 0.585 | 0.459 | 1 |
| Yme1l1 | 0.048451412 | -0.444321499 | 0.364 | 0.459 | 1 |
| Rbm39 | 0.048491276 | 0.271714476 | 0.869 | 0.798 | 1 |
| Ntng1 | 0.048592613 | 0.535570037 | 0.227 | 0.138 | 1 |
| Rit1.1 | 0.04862652 | -0.323911655 | 0.5 | 0.633 | 1 |
| Tacc1 | 0.048645084 | -0.424996209 | 0.562 | 0.67 | 1 |
| Klhl29 | 0.048928395 | -0.547289374 | 0.432 | 0.505 | 1 |
| Synpr | 0.049198525 | -0.304325089 | 0.33 | 0.44 | 1 |
| Zfp36l1 | 0.049207649 | 0.432520315 | 0.312 | 0.211 | 1 |
| Parvb | 0.049604671 | 0.374470566 | 0.21 | 0.119 | 1 |
| Hgsnat | 0.049662243 | 0.269512694 | 0.182 | 0.101 | 1 |
| Atp1b1 | 0.049703182 | -0.380026453 | 0.676 | 0.725 | 1 |
| Pfkfb3 | 0.04985782 | 0.252369589 | 0.159 | 0.083 | 1 |
| Kirrel | 0.049930293 | 0.398405087 | 0.136 | 0.064 | 1 |
| Plppr1 | 0.050080846 | -0.465700048 | 0.403 | 0.477 | 1 |
| AU021092 | 0.050172674 | -0.375406302 | 0.057 | 0.119 | 1 |
| Eef2 | 0.050234292 | 0.354860907 | 0.358 | 0.248 | 1 |
| Sarnp | 0.050435253 | -0.337363067 | 0.358 | 0.45 | 1 |
| Ppp2cb | 0.050658821 | 0.252193114 | 0.125 | 0.055 | 1 |
| Qdpr | 0.050776705 | 0.281754745 | 0.182 | 0.101 | 1 |
| Papd4 | 0.050973333 | 0.487193372 | 0.443 | 0.367 | 1 |
| C79798 | 0.051101464 | -0.299826058 | 0.091 | 0.165 | 1 |
| Pcsk2os1 | 0.051471078 | -0.294668624 | 0.057 | 0.119 | 1 |
| Il13ra1 | 0.051549119 | 0.34605362 | 0.136 | 0.064 | 1 |
| Skp1a | 0.051574389 | -0.34517727 | 0.148 | 0.239 | 1 |
| B3gntl1 | 0.051626233 | 0.259718635 | 0.182 | 0.101 | 1 |
| Rras | 0.052027698 | 0.25366123 | 0.125 | 0.055 | 1 |
| Sdk1 | 0.052302771 | -0.52533833 | 0.131 | 0.211 | 1 |
| Ppp1r21 | 0.052353472 | 0.440932961 | 0.352 | 0.266 | 1 |
| Mark3 | 0.052588016 | -0.373063268 | 0.58 | 0.633 | 1 |
| Gm20642 | 0.05270178 | -0.294224341 | 0.114 | 0.193 | 1 |
| Lima1 | 0.052752961 | 0.384616602 | 0.33 | 0.229 | 1 |
| Reps2 | 0.05285395 | -0.40284844 | 0.358 | 0.45 | 1 |
| Pdgfc | 0.05296442 | -0.460761892 | 0.08 | 0.147 | 1 |
| Lrrtm2 | 0.052985768 | -0.357738733 | 0.062 | 0.128 | 1 |
| 6430573F11Rik | 0.053356689 | -0.334750999 | 0.062 | 0.128 | 1 |
| Syap1 | 0.053509022 | -0.276749534 | 0.097 | 0.174 | 1 |
| D430041D05Rik | 0.053509128 | -0.470865675 | 0.358 | 0.431 | 1 |
| Tor1aip1 | 0.053916363 | 0.301783747 | 0.341 | 0.239 | 1 |
| Htr1f | 0.053961335 | -0.281960735 | 0.188 | 0.284 | 1 |
| Wwox | 0.054164978 | 0.400586605 | 0.636 | 0.532 | 1 |
| Cntn4 | 0.05429385 | 0.29931779 | 0.585 | 0.468 | 1 |
| Casc4 | 0.05449989 | -0.335378423 | 0.364 | 0.468 | 1 |
| Pced1b | 0.054617417 | 0.264397143 | 0.409 | 0.303 | 1 |
| Nat14 | 0.054742304 | -0.337179056 | 0.057 | 0.119 | 1 |
| Parva | 0.054817682 | 0.391952735 | 0.216 | 0.128 | 1 |
| Syn2 | 0.054843988 | -0.40673134 | 0.409 | 0.477 | 1 |
| Atrx | 0.054939291 | -0.425445855 | 0.699 | 0.706 | 1 |
| Nell1 | 0.05542849 | 0.280153386 | 0.205 | 0.119 | 1 |
| Grm7 | 0.055438452 | -0.358623902 | 0.824 | 0.798 | 1 |
| Arpc1a | 0.055488273 | -0.463682671 | 0.386 | 0.477 | 1 |
| Ywhaz | 0.055513481 | -0.302157084 | 0.614 | 0.706 | 1 |
| Tgfbr1 | 0.055715719 | 0.413625533 | 0.205 | 0.119 | 1 |
| Cacna2d3 | 0.055934751 | -0.252767792 | 0.614 | 0.725 | 1 |
| Sept11 | 0.055956702 | 0.351344788 | 0.574 | 0.468 | 1 |
| Thap3 | 0.056102732 | 0.306125848 | 0.239 | 0.147 | 1 |
| Atp5a1 | 0.056216862 | -0.262860566 | 0.392 | 0.495 | 1 |
| Ripor2 | 0.056217014 | -0.42952541 | 0.324 | 0.431 | 1 |
| Atp6v1d | 0.056276003 | -0.596339968 | 0.199 | 0.284 | 1 |
| Cspg5 | 0.056520731 | -0.583850486 | 0.233 | 0.321 | 1 |
| Pik3c3 | 0.056669051 | -0.372003532 | 0.114 | 0.193 | 1 |
| Shroom4 | 0.056762338 | 0.402951566 | 0.273 | 0.174 | 1 |
| Dido1 | 0.056936988 | 0.287327089 | 0.352 | 0.239 | 1 |
| 2210408I21Rik | 0.056959528 | 0.520260189 | 0.466 | 0.376 | 1 |
| Hsp90b1 | 0.057046539 | -0.379318148 | 0.347 | 0.45 | 1 |
| Vtn | 0.057096947 | 0.557659722 | 0.273 | 0.183 | 1 |
| Tsg101 | 0.057108506 | -0.574295376 | 0.188 | 0.266 | 1 |
| Babam1 | 0.057137773 | 0.271027962 | 0.21 | 0.128 | 1 |
| Plxdc2 | 0.057423255 | 0.38541606 | 0.688 | 0.569 | 1 |
| Dsel | 0.057542865 | -0.646379026 | 0.091 | 0.156 | 1 |
| Tbc1d9b | 0.057712045 | 0.316950128 | 0.301 | 0.202 | 1 |
| Mtus1 | 0.058089683 | 0.257792759 | 0.489 | 0.358 | 1 |
| Kif13b | 0.058463228 | 0.338696739 | 0.506 | 0.413 | 1 |
| Ccdc57 | 0.058478828 | 0.311670312 | 0.284 | 0.202 | 1 |
| Papss1 | 0.058706248 | 0.341139147 | 0.324 | 0.229 | 1 |
| Raf1 | 0.058721253 | 0.299724919 | 0.409 | 0.303 | 1 |
| Mppe1 | 0.058799298 | -0.285232872 | 0.045 | 0.101 | 1 |
| E430024I08Rik | 0.058877057 | 0.254674451 | 0.119 | 0.055 | 1 |
| Ypel3 | 0.059004514 | 0.302619373 | 0.239 | 0.147 | 1 |
| E130308A19Rik | 0.059360071 | 0.287638832 | 0.455 | 0.349 | 1 |
| Enah | 0.059907298 | -0.273618564 | 0.403 | 0.505 | 1 |
| Ncstn | 0.059924266 | 0.301318487 | 0.165 | 0.092 | 1 |
| Fbxw7 | 0.060467959 | -0.276985427 | 0.352 | 0.459 | 1 |
| Hsf2 | 0.060600443 | -0.359591875 | 0.108 | 0.183 | 1 |
| Fam184b | 0.060710501 | -0.305858016 | 0.188 | 0.275 | 1 |
| Svip | 0.061301256 | -0.330400969 | 0.074 | 0.138 | 1 |
| Plp1 | 0.061351687 | 0.270748052 | 0.938 | 0.844 | 1 |
| Gstt2 | 0.061780836 | 0.306078803 | 0.182 | 0.101 | 1 |
| Fryl | 0.062499571 | 0.268622631 | 0.71 | 0.596 | 1 |
| Trim26 | 0.062667008 | 0.3336567 | 0.165 | 0.092 | 1 |
| Atp6v1g2 | 0.062940557 | -0.609220789 | 0.148 | 0.22 | 1 |
| Rcor1 | 0.063124912 | 0.27743668 | 0.341 | 0.239 | 1 |
| Zc3h7b | 0.063229426 | -0.467268416 | 0.239 | 0.33 | 1 |
| Bcl11a | 0.063276573 | -0.443918027 | 0.324 | 0.422 | 1 |
| Ccnh | 0.063870433 | 0.313619316 | 0.33 | 0.229 | 1 |
| Cpe | 0.063957603 | -0.408591749 | 0.568 | 0.624 | 1 |
| Kcnc3 | 0.064016031 | -0.315784735 | 0.045 | 0.101 | 1 |
| Mapt | 0.064083873 | 0.437993349 | 0.443 | 0.367 | 1 |
| Nhsl2 | 0.064175265 | 0.335794954 | 0.409 | 0.321 | 1 |
| Gm26724 | 0.06463841 | -0.262105376 | 0.08 | 0.147 | 1 |
| Nsg1 | 0.064653889 | -0.367732328 | 0.278 | 0.376 | 1 |
| Mxd4 | 0.064670193 | 0.345963472 | 0.335 | 0.257 | 1 |
| Lmbr1l | 0.064744894 | 0.26468147 | 0.108 | 0.046 | 1 |
| Pde4d | 0.0648117 | 0.345786285 | 0.71 | 0.606 | 1 |
| Gpr107 | 0.065228981 | 0.28539976 | 0.312 | 0.22 | 1 |
| A830082K12Rik | 0.065232799 | 0.332242869 | 0.193 | 0.11 | 1 |
| Gad2 | 0.065277744 | -0.400124161 | 0.443 | 0.523 | 1 |
| Trim2 | 0.06528218 | -0.422337068 | 0.438 | 0.523 | 1 |
| Tomm20 | 0.065570132 | -0.417353623 | 0.131 | 0.211 | 1 |
| Grb2 | 0.065761014 | -0.373204873 | 0.347 | 0.431 | 1 |
| Supt16 | 0.066112537 | 0.295765323 | 0.307 | 0.211 | 1 |
| Ints7 | 0.066426958 | -0.328680592 | 0.165 | 0.248 | 1 |
| Atf6b | 0.066514866 | -0.28273245 | 0.051 | 0.11 | 1 |
| Itm2c | 0.066516961 | -0.458522952 | 0.568 | 0.67 | 1 |
| Gabpa | 0.066661221 | 0.264563487 | 0.142 | 0.073 | 1 |
| Wfdc1 | 0.066683079 | 0.262823589 | 0.119 | 0.055 | 1 |
| Lims2 | 0.06682757 | 0.368263988 | 0.256 | 0.165 | 1 |
| Nrbp2 | 0.066885955 | 0.325426332 | 0.233 | 0.156 | 1 |
| Atp9a | 0.067038277 | -0.413620601 | 0.364 | 0.459 | 1 |
| Cobl | 0.067058224 | -0.411548781 | 0.341 | 0.413 | 1 |
| Pard3b | 0.067134805 | 0.258140327 | 0.5 | 0.385 | 1 |
| Zfp335os | 0.067344837 | -0.321739853 | 0.108 | 0.183 | 1 |
| Hist1h2bc | 0.06799021 | 0.295247614 | 0.119 | 0.055 | 1 |
| Gm37494 | 0.068073869 | 0.402489584 | 0.324 | 0.239 | 1 |
| Eif3h | 0.068240116 | 0.270585324 | 0.273 | 0.183 | 1 |
| Marcks | 0.068446159 | -0.435310556 | 0.284 | 0.385 | 1 |
| Ythdf2 | 0.068605062 | -0.359736409 | 0.097 | 0.165 | 1 |
| Esam | 0.068665699 | 0.380086711 | 0.256 | 0.165 | 1 |
| Rap1a | 0.069113834 | 0.300502919 | 0.506 | 0.413 | 1 |
| Kidins220 | 0.069211458 | -0.455394118 | 0.585 | 0.606 | 1 |
| Golim4 | 0.069272597 | 0.267805044 | 0.369 | 0.266 | 1 |
| Ramp2 | 0.0693483 | 0.531361708 | 0.29 | 0.202 | 1 |
| Tpk1 | 0.069620286 | 0.327776985 | 0.25 | 0.165 | 1 |
| Zbtb7a | 0.070090652 | -0.383389874 | 0.222 | 0.312 | 1 |
| Rab2b | 0.070638651 | 0.344171035 | 0.153 | 0.083 | 1 |
| Slc1a3 | 0.070848174 | 0.953595468 | 0.301 | 0.22 | 1 |
| Suco | 0.070888165 | -0.448243759 | 0.244 | 0.33 | 1 |
| Spcs2 | 0.071098077 | -0.440534089 | 0.239 | 0.33 | 1 |
| Galnt11 | 0.071148227 | 0.368744287 | 0.318 | 0.229 | 1 |
| Ston1 | 0.071579192 | 0.332840129 | 0.119 | 0.055 | 1 |
| Zfp362 | 0.071852047 | 0.310361844 | 0.284 | 0.202 | 1 |
| Irs2 | 0.072130905 | -0.277313255 | 0.085 | 0.156 | 1 |
| Tmem179 | 0.072230032 | -0.330645857 | 0.097 | 0.165 | 1 |
| Cdc14b | 0.072312195 | 0.429223571 | 0.284 | 0.202 | 1 |
| Abhd15 | 0.072491222 | -0.422039182 | 0.148 | 0.229 | 1 |
| Chrm1 | 0.07280404 | -0.278167224 | 0.102 | 0.174 | 1 |
| Ror1 | 0.072942451 | 0.624838834 | 0.438 | 0.33 | 1 |
| Deptor | 0.072980933 | 0.253049629 | 0.176 | 0.101 | 1 |
| Cab39 | 0.073011561 | 0.302178343 | 0.5 | 0.394 | 1 |
| Vangl1 | 0.073095519 | 0.271415962 | 0.165 | 0.092 | 1 |
| Podxl | 0.0732003 | 0.308405314 | 0.335 | 0.239 | 1 |
| Kcnq1ot1 | 0.073262358 | 0.353793965 | 0.557 | 0.486 | 1 |
| Cnp | 0.073660837 | -0.451271638 | 0.159 | 0.239 | 1 |
| Herc4 | 0.07416277 | 0.307439555 | 0.523 | 0.422 | 1 |
| Atxn3 | 0.074172682 | -0.262258461 | 0.176 | 0.275 | 1 |
| Fzd3 | 0.07500157 | -0.586088818 | 0.233 | 0.312 | 1 |
| Per2 | 0.075017409 | -0.331185559 | 0.153 | 0.239 | 1 |
| Wfs1 | 0.075617421 | -0.250836814 | 0.131 | 0.211 | 1 |
| Seh1l | 0.075668691 | -0.388833312 | 0.062 | 0.119 | 1 |
| Mtmr7 | 0.075744795 | -0.533480364 | 0.21 | 0.284 | 1 |
| Smad2 | 0.075898677 | 0.386114582 | 0.21 | 0.128 | 1 |
| Hpcal4 | 0.076010367 | -0.359834878 | 0.097 | 0.165 | 1 |
| Tmcc1 | 0.076126812 | 0.266619622 | 0.727 | 0.633 | 1 |
| Specc1l | 0.07621861 | 0.311474041 | 0.415 | 0.321 | 1 |
| Gap43 | 0.076790719 | -0.476097938 | 0.364 | 0.459 | 1 |
| Mpdz | 0.076816693 | -0.251677082 | 0.153 | 0.239 | 1 |
| Gm44148 | 0.076834311 | 0.3968821 | 0.153 | 0.083 | 1 |
| Atp2a2 | 0.076859173 | -0.329787484 | 0.705 | 0.743 | 1 |
| Dock1 | 0.076919734 | 0.398131833 | 0.58 | 0.477 | 1 |
| Gpr63 | 0.077750724 | -0.413269792 | 0.142 | 0.211 | 1 |
| Clcn4 | 0.077758914 | -0.351378204 | 0.159 | 0.239 | 1 |
| Odf2 | 0.077848847 | 0.274186266 | 0.375 | 0.275 | 1 |
| Slc40a1 | 0.077875417 | 0.397614529 | 0.25 | 0.165 | 1 |
| Flnb | 0.078149573 | 0.306361361 | 0.494 | 0.376 | 1 |
| Gabarap | 0.078489456 | 0.257247854 | 0.256 | 0.165 | 1 |
| Faf1 | 0.07872919 | -0.326609083 | 0.602 | 0.651 | 1 |
| Vapa | 0.078962399 | -0.509907848 | 0.341 | 0.404 | 1 |
| Azin1 | 0.07905718 | -0.371196748 | 0.148 | 0.229 | 1 |
| Rtf1 | 0.079068905 | -0.34786175 | 0.284 | 0.376 | 1 |
| Keap1 | 0.079306954 | 0.349631568 | 0.125 | 0.064 | 1 |
| Cep126 | 0.079353602 | 0.334711387 | 0.29 | 0.202 | 1 |
| Otud7b | 0.079408376 | 0.384809841 | 0.489 | 0.422 | 1 |
| Peak1 | 0.079481596 | 0.370597433 | 0.574 | 0.505 | 1 |
| Naalad2 | 0.079541904 | 0.255359892 | 0.131 | 0.064 | 1 |
| Hdac1 | 0.07961194 | 0.30400104 | 0.193 | 0.119 | 1 |
| P4ha1 | 0.079830003 | -0.567303775 | 0.295 | 0.349 | 1 |
| Csrp2 | 0.079870695 | 0.271635307 | 0.142 | 0.073 | 1 |
| Dpm2 | 0.079882908 | -0.275241532 | 0.068 | 0.128 | 1 |
| Alkbh8 | 0.080132154 | 0.31963351 | 0.222 | 0.147 | 1 |
| Far1os | 0.080224272 | -0.283666694 | 0.17 | 0.257 | 1 |
| Uggt2 | 0.080318082 | 0.400411933 | 0.307 | 0.239 | 1 |
| Slc16a9 | 0.080329782 | 0.343653309 | 0.142 | 0.073 | 1 |
| Gm38251 | 0.080377963 | -0.391826561 | 0.085 | 0.147 | 1 |
| Fnbp1 | 0.080529191 | 0.256229108 | 0.597 | 0.514 | 1 |
| Fbxl15 | 0.080733867 | -0.393171868 | 0.057 | 0.11 | 1 |
| Aldoa | 0.080909513 | -0.515210028 | 0.381 | 0.45 | 1 |
| Sub1 | 0.081057953 | -0.412492072 | 0.29 | 0.376 | 1 |
| Bin1 | 0.081396061 | 0.345644332 | 0.398 | 0.33 | 1 |
| Ylpm1 | 0.081527622 | -0.397050868 | 0.5 | 0.56 | 1 |
| Echdc1 | 0.081556188 | 0.312741591 | 0.182 | 0.11 | 1 |
| Tmem68 | 0.081827272 | -0.299471859 | 0.119 | 0.193 | 1 |
| Phf10 | 0.081882642 | -0.256466057 | 0.114 | 0.193 | 1 |
| Itpkb | 0.081963784 | 0.286908262 | 0.301 | 0.202 | 1 |
| Hspa5 | 0.082188626 | -0.50302374 | 0.273 | 0.349 | 1 |
| Wdr89 | 0.082372651 | -0.463539981 | 0.352 | 0.431 | 1 |
| Fam69a | 0.082408438 | 0.257622605 | 0.341 | 0.248 | 1 |
| Gng3 | 0.082565701 | -0.339205309 | 0.108 | 0.174 | 1 |
| Gm26694 | 0.082671761 | -0.29739891 | 0.369 | 0.459 | 1 |
| Snap25 | 0.082947346 | -0.261436794 | 0.665 | 0.734 | 1 |
| Gak | 0.083024663 | 0.280843956 | 0.295 | 0.202 | 1 |
| Tm9sf2 | 0.083117334 | -0.307485485 | 0.284 | 0.376 | 1 |
| Ndrg4 | 0.083173208 | -0.360458142 | 0.693 | 0.752 | 1 |
| Ptprm | 0.083499601 | 0.264556237 | 0.682 | 0.56 | 1 |
| Oaz1 | 0.083558151 | 0.31595357 | 0.432 | 0.339 | 1 |
| Synm | 0.083814206 | 0.264789718 | 0.256 | 0.165 | 1 |
| Srgap1 | 0.084021435 | -0.292146611 | 0.489 | 0.56 | 1 |
| Lrrc4 | 0.08435914 | -0.469670196 | 0.301 | 0.385 | 1 |
| Sptbn2 | 0.084402793 | -0.27469217 | 0.193 | 0.284 | 1 |
| Tmod3 | 0.084504839 | 0.410852394 | 0.409 | 0.321 | 1 |
| Slc16a1 | 0.084647177 | 0.482850768 | 0.193 | 0.119 | 1 |
| Airn | 0.084718467 | 0.563652869 | 0.352 | 0.266 | 1 |
| Ptprn | 0.08471852 | -0.358010558 | 0.398 | 0.459 | 1 |
| Glul | 0.084900784 | 0.430477005 | 0.381 | 0.312 | 1 |
| Bex2 | 0.08495221 | -0.658021546 | 0.273 | 0.349 | 1 |
| D430036J16Rik | 0.084990111 | -0.25278015 | 0.097 | 0.165 | 1 |
| Plcg1 | 0.085528907 | 0.252646027 | 0.324 | 0.239 | 1 |
| Kcnh7 | 0.08577393 | -0.432720576 | 0.301 | 0.367 | 1 |
| Eml1 | 0.085843974 | 0.288635642 | 0.5 | 0.431 | 1 |
| Slain1 | 0.086158718 | 0.307460884 | 0.341 | 0.248 | 1 |
| St6galnac3 | 0.086192373 | 0.301362381 | 0.676 | 0.578 | 1 |
| Lrrfip2 | 0.086709001 | 0.294049105 | 0.33 | 0.229 | 1 |
| Eprs | 0.087136365 | -0.299202125 | 0.239 | 0.33 | 1 |
| March8 | 0.087153956 | 0.319577287 | 0.193 | 0.119 | 1 |
| Cldn5 | 0.087559883 | 0.371496175 | 0.324 | 0.239 | 1 |
| Ring1 | 0.087635842 | 0.286550035 | 0.102 | 0.046 | 1 |
| Agrn | 0.087660649 | 0.268742698 | 0.403 | 0.303 | 1 |
| Rbm17 | 0.088221274 | -0.263776865 | 0.091 | 0.156 | 1 |
| Mettl16 | 0.088292887 | 0.355829214 | 0.256 | 0.174 | 1 |
| Gm13269 | 0.088314723 | -0.278292072 | 0.21 | 0.294 | 1 |
| Ostf1 | 0.088515867 | 0.250364937 | 0.222 | 0.138 | 1 |
| 9130011E15Rik | 0.088780271 | 0.383206243 | 0.398 | 0.312 | 1 |
| Stra6 | 0.088937211 | -0.332012975 | 0.068 | 0.128 | 1 |
| Wasl | 0.089047528 | 0.33664869 | 0.386 | 0.303 | 1 |
| Pomp | 0.089101288 | 0.264185043 | 0.227 | 0.147 | 1 |
| Cfap77 | 0.089135802 | -0.292342265 | 0.17 | 0.257 | 1 |
| Bex1 | 0.089272673 | -0.469083022 | 0.125 | 0.193 | 1 |
| Cspg4 | 0.089695506 | 0.260440919 | 0.176 | 0.101 | 1 |
| Papolg | 0.089923451 | -0.272610818 | 0.114 | 0.183 | 1 |
| Gm30624 | 0.090067061 | 0.310010576 | 0.131 | 0.064 | 1 |
| Slc6a6 | 0.090306296 | 0.434983594 | 0.676 | 0.633 | 1 |
| Pon2 | 0.090582462 | 0.331980761 | 0.182 | 0.11 | 1 |
| Gnas | 0.090632777 | 0.337518219 | 0.659 | 0.596 | 1 |
| Snhg20 | 0.091049301 | 0.29442861 | 0.125 | 0.064 | 1 |
| Bcl2 | 0.091236157 | 0.346689859 | 0.369 | 0.275 | 1 |
| Ntm | 0.091313525 | 0.527213134 | 0.699 | 0.651 | 1 |
| Aqr | 0.091806843 | -0.406544718 | 0.233 | 0.312 | 1 |
| Ets2 | 0.091922483 | 0.266652766 | 0.17 | 0.101 | 1 |
| Atxn10 | 0.092375498 | 0.348469713 | 0.472 | 0.394 | 1 |
| Megf8 | 0.092625509 | -0.392741665 | 0.119 | 0.183 | 1 |
| Rnf2 | 0.092790912 | 0.291528068 | 0.193 | 0.119 | 1 |
| Rassf8 | 0.093329288 | 0.254775252 | 0.409 | 0.33 | 1 |
| Ints3 | 0.093768773 | 0.271818638 | 0.222 | 0.147 | 1 |
| Gtf2ird1 | 0.093837527 | -0.366870273 | 0.267 | 0.349 | 1 |
| Ahnak | 0.093847745 | 0.372602011 | 0.295 | 0.211 | 1 |
| Dnm1l | 0.094077227 | 0.333288068 | 0.432 | 0.33 | 1 |
| Gm32647 | 0.094376416 | -0.44678064 | 0.267 | 0.349 | 1 |
| Nrf1 | 0.094512102 | 0.300994225 | 0.438 | 0.376 | 1 |
| Stk11 | 0.094626948 | 0.279511876 | 0.136 | 0.073 | 1 |
| Mbd2 | 0.094904378 | 0.274655108 | 0.438 | 0.367 | 1 |
| Gpm6a | 0.095006186 | -0.263818325 | 0.739 | 0.743 | 1 |
| Ppfia4 | 0.095174123 | 0.276417445 | 0.153 | 0.092 | 1 |
| Dguok | 0.095482735 | 0.262610342 | 0.227 | 0.156 | 1 |
| Slc9a7 | 0.095693256 | 0.328534534 | 0.227 | 0.156 | 1 |
| Pald1 | 0.095775229 | 0.408570889 | 0.239 | 0.156 | 1 |
| Notch3 | 0.096115436 | 0.336102635 | 0.295 | 0.211 | 1 |
| Riok1 | 0.096227237 | -0.308396998 | 0.119 | 0.193 | 1 |
| Itih5 | 0.096516409 | 0.400231422 | 0.347 | 0.266 | 1 |
| Ppp1r37 | 0.096751972 | 0.275340333 | 0.227 | 0.156 | 1 |
| Hectd4 | 0.097232641 | 0.305357192 | 0.5 | 0.404 | 1 |
| C130073E24Rik | 0.097399695 | -0.313608538 | 0.165 | 0.239 | 1 |
| Enpp5 | 0.097414307 | -0.500696152 | 0.17 | 0.239 | 1 |
| Jun | 0.097925988 | -0.365308107 | 0.142 | 0.211 | 1 |
| Wipf1 | 0.098056804 | 0.351928511 | 0.409 | 0.33 | 1 |
| Cfap46 | 0.09809248 | -0.335828267 | 0.114 | 0.183 | 1 |
| Ginm1 | 0.098413722 | 0.308826782 | 0.136 | 0.073 | 1 |
| Sugp1 | 0.09844934 | 0.354309568 | 0.21 | 0.138 | 1 |
| Zc3h7a | 0.098573175 | 0.284897418 | 0.381 | 0.303 | 1 |
| Mapk6 | 0.098684128 | 0.287331356 | 0.267 | 0.193 | 1 |
| Gdap1 | 0.099042987 | -0.32526177 | 0.176 | 0.248 | 1 |
| Wdfy3 | 0.099184326 | 0.272670021 | 0.659 | 0.569 | 1 |
| Dab2 | 0.099548957 | 0.47909079 | 0.216 | 0.147 | 1 |
| Sept4 | 0.099639205 | 0.386723387 | 0.381 | 0.303 | 1 |
| Nes | 0.099646197 | 0.33685103 | 0.17 | 0.101 | 1 |
| Inpp1 | 0.099798579 | 0.273290204 | 0.21 | 0.138 | 1 |
| Hspa13 | 0.100016747 | -0.306668507 | 0.051 | 0.101 | 1 |
| Rpl27a | 0.101131187 | 0.268883763 | 0.273 | 0.183 | 1 |
| Rnf169 | 0.101538908 | 0.252667106 | 0.545 | 0.459 | 1 |
| Ptchd4 | 0.101994147 | -0.403979598 | 0.239 | 0.321 | 1 |
| Gm10754 | 0.10293129 | -0.292186938 | 0.426 | 0.514 | 1 |
| 0610010F05Rik | 0.102983612 | -0.284329533 | 0.205 | 0.284 | 1 |
| Gm21992 | 0.103069002 | 0.314499608 | 0.438 | 0.339 | 1 |
| Nalcn | 0.103492605 | 0.316712751 | 0.46 | 0.367 | 1 |
| Slc24a3 | 0.103513309 | 0.638127318 | 0.369 | 0.303 | 1 |
| Hspb1 | 0.103576574 | 0.283009945 | 0.148 | 0.083 | 1 |
| Rnf141 | 0.103623994 | 0.348855598 | 0.222 | 0.147 | 1 |
| Setdb1 | 0.103835636 | -0.356527352 | 0.193 | 0.275 | 1 |
| Bag4 | 0.103963819 | -0.302113575 | 0.136 | 0.211 | 1 |
| Vgf | 0.104878596 | -0.35133898 | 0.182 | 0.257 | 1 |
| Ifitm3 | 0.104998545 | 0.485614348 | 0.216 | 0.147 | 1 |
| Id1 | 0.105159129 | 0.44960523 | 0.278 | 0.202 | 1 |
| 4931406C07Rik | 0.10525623 | 0.370121364 | 0.165 | 0.101 | 1 |
| Aamp | 0.105315803 | -0.364741842 | 0.097 | 0.156 | 1 |
| Hnrnpf | 0.105441037 | 0.375031617 | 0.318 | 0.248 | 1 |
| Fkbp1a | 0.10619359 | -0.42537659 | 0.398 | 0.486 | 1 |
| Cd302 | 0.106449996 | 0.25120299 | 0.142 | 0.083 | 1 |
| Ocrl | 0.106643244 | -0.354933757 | 0.324 | 0.413 | 1 |
| Zbtb21 | 0.106733431 | 0.26011325 | 0.131 | 0.073 | 1 |
| Ier5l | 0.107377499 | 0.323426816 | 0.165 | 0.101 | 1 |
| Rfx7 | 0.108782701 | -0.451787079 | 0.443 | 0.514 | 1 |
| 4930517O19Rik | 0.108860811 | -0.281663657 | 0.216 | 0.294 | 1 |
| Slc38a11 | 0.108862233 | 0.400793044 | 0.25 | 0.165 | 1 |
| Eif2b4 | 0.109327859 | 0.324502194 | 0.142 | 0.083 | 1 |
| Ubp1 | 0.109633469 | -0.352866007 | 0.256 | 0.339 | 1 |
| Zfyve9 | 0.10969364 | 0.31557072 | 0.534 | 0.459 | 1 |
| Grm8 | 0.109723158 | 0.286045555 | 0.199 | 0.128 | 1 |
| Top2b | 0.110131798 | 0.262817271 | 0.443 | 0.367 | 1 |
| Agap3 | 0.110381227 | -0.378438422 | 0.216 | 0.294 | 1 |
| Snca | 0.110500659 | -0.306788662 | 0.375 | 0.477 | 1 |
| Cisd1 | 0.110725641 | -0.445278216 | 0.148 | 0.211 | 1 |
| H2-T23 | 0.110836112 | 0.286702636 | 0.108 | 0.055 | 1 |
| Zkscan1 | 0.111293664 | 0.333038127 | 0.205 | 0.138 | 1 |
| Rit2 | 0.111432244 | -0.30989265 | 0.409 | 0.477 | 1 |
| Kat2b | 0.111542394 | 0.29357936 | 0.443 | 0.358 | 1 |
| Ecsit | 0.111786162 | 0.260017137 | 0.153 | 0.092 | 1 |
| L3mbtl3 | 0.112098944 | 0.265010628 | 0.227 | 0.156 | 1 |
| 1700018A04Rik | 0.112500098 | 0.414588882 | 0.131 | 0.073 | 1 |
| Polr3e | 0.112587239 | 0.445284327 | 0.17 | 0.11 | 1 |
| Spin1 | 0.113239214 | 0.252110128 | 0.267 | 0.183 | 1 |
| Zfp532 | 0.113313125 | 0.310175127 | 0.551 | 0.468 | 1 |
| Arf5 | 0.113799469 | -0.464446629 | 0.273 | 0.339 | 1 |
| Tmem151a | 0.113855211 | 0.285518102 | 0.233 | 0.165 | 1 |
| Mn1 | 0.114257005 | -0.374719849 | 0.114 | 0.174 | 1 |
| Carmn | 0.114499919 | 0.331108222 | 0.159 | 0.092 | 1 |
| Gja1 | 0.114662685 | -0.300560059 | 0.097 | 0.156 | 1 |
| Prr7 | 0.114784964 | -0.326965659 | 0.091 | 0.147 | 1 |
| A330102I10Rik | 0.115209921 | -0.310706614 | 0.233 | 0.312 | 1 |
| Ablim1 | 0.115679468 | 0.405116977 | 0.597 | 0.514 | 1 |
| Mtch2 | 0.115891143 | -0.288074207 | 0.227 | 0.303 | 1 |
| Cinp | 0.115987496 | -0.357125534 | 0.068 | 0.119 | 1 |
| Dpyd | 0.116029666 | 0.446656749 | 0.182 | 0.119 | 1 |
| Cnot10 | 0.116145768 | 0.348822785 | 0.318 | 0.239 | 1 |
| Abcc9 | 0.116505594 | 0.414752178 | 0.233 | 0.156 | 1 |
| Atp6v0b | 0.11651943 | -0.365983845 | 0.472 | 0.55 | 1 |
| Aco1 | 0.116833393 | 0.31480149 | 0.159 | 0.101 | 1 |
| Gtf2h2 | 0.117098028 | -0.420429973 | 0.193 | 0.266 | 1 |
| Cbfa2t2 | 0.117117073 | 0.325841448 | 0.449 | 0.358 | 1 |
| Abhd6 | 0.117383629 | 0.2630966 | 0.222 | 0.156 | 1 |
| Nadk2 | 0.118099999 | -0.351404447 | 0.068 | 0.119 | 1 |
| Hist3h2ba | 0.118191998 | -0.500657733 | 0.062 | 0.11 | 1 |
| Nefl | 0.11833159 | -0.341295711 | 0.097 | 0.156 | 1 |
| Ubl5 | 0.118951929 | -0.31697875 | 0.097 | 0.156 | 1 |
| Sugp2 | 0.118954835 | 0.264716352 | 0.21 | 0.147 | 1 |
| Slc6a20a | 0.119191012 | 0.352089819 | 0.307 | 0.22 | 1 |
| Dscam | 0.119309528 | 0.519377821 | 0.182 | 0.119 | 1 |
| Arfgap2 | 0.119574813 | 0.258570098 | 0.142 | 0.083 | 1 |
| Ddb1 | 0.119802292 | 0.430739001 | 0.216 | 0.156 | 1 |
| Zcchc6 | 0.120196837 | 0.364205831 | 0.233 | 0.165 | 1 |
| Zfp706 | 0.120461412 | -0.260964141 | 0.17 | 0.248 | 1 |
| Tbx3os1 | 0.120749201 | 0.404742332 | 0.256 | 0.174 | 1 |
| Rps4x | 0.120824587 | -0.552854662 | 0.119 | 0.174 | 1 |
| Itpr2 | 0.120975902 | 0.261790744 | 0.369 | 0.284 | 1 |
| Impad1 | 0.121328942 | 0.337555224 | 0.29 | 0.211 | 1 |
| H2-D1 | 0.121443519 | 0.286161131 | 0.25 | 0.174 | 1 |
| 2610020C07Rik | 0.121517359 | -0.30233088 | 0.188 | 0.257 | 1 |
| Chd6 | 0.121554807 | 0.253314825 | 0.574 | 0.495 | 1 |
| Tm6sf1 | 0.122101944 | 0.256274909 | 0.131 | 0.073 | 1 |
| Nhsl1 | 0.122661781 | 0.289146055 | 0.295 | 0.211 | 1 |
| Eda | 0.122710474 | 0.460620745 | 0.17 | 0.11 | 1 |
| Nfyc | 0.123359543 | -0.462494359 | 0.312 | 0.367 | 1 |
| Scg2 | 0.123719143 | -0.478736357 | 0.244 | 0.321 | 1 |
| Adgrf5 | 0.124248346 | 0.294580888 | 0.403 | 0.312 | 1 |
| Ddx42 | 0.124640868 | 0.266326845 | 0.301 | 0.229 | 1 |
| Tle1 | 0.124644759 | -0.252518166 | 0.443 | 0.514 | 1 |
| Rnf11 | 0.124769421 | -0.26777478 | 0.25 | 0.339 | 1 |
| Sowaha | 0.124973595 | -0.399093737 | 0.062 | 0.11 | 1 |
| Maml3 | 0.125009605 | 0.254561277 | 0.449 | 0.349 | 1 |
| Chchd1 | 0.12536021 | -0.307303373 | 0.068 | 0.119 | 1 |
| Puf60 | 0.12556788 | 0.354618178 | 0.176 | 0.11 | 1 |
| Cct3 | 0.125849685 | -0.496811898 | 0.17 | 0.239 | 1 |
| D430019H16Rik | 0.125945046 | -0.414576976 | 0.097 | 0.156 | 1 |
| Ncoa3 | 0.126468394 | -0.288054965 | 0.295 | 0.367 | 1 |
| Ap4s1 | 0.126589345 | 0.316140182 | 0.216 | 0.156 | 1 |
| Ech1 | 0.126596341 | -0.276017703 | 0.097 | 0.156 | 1 |
| Sf3a1 | 0.126783128 | 0.270749376 | 0.153 | 0.092 | 1 |
| Dock8 | 0.126853148 | -0.367437037 | 0.068 | 0.119 | 1 |
| Vim | 0.127559737 | 0.360380222 | 0.205 | 0.138 | 1 |
| Nprl3 | 0.127568973 | 0.394407349 | 0.216 | 0.147 | 1 |
| Lman2l | 0.127767619 | -0.256871186 | 0.222 | 0.294 | 1 |
| Pcgf5 | 0.127885535 | -0.37973533 | 0.284 | 0.349 | 1 |
| Sipa1l3 | 0.128679943 | 0.297340281 | 0.386 | 0.321 | 1 |
| Mill2 | 0.128920562 | 0.342750228 | 0.273 | 0.193 | 1 |
| Clptm1l | 0.12978651 | -0.382867267 | 0.142 | 0.202 | 1 |
| Scap | 0.130006525 | -0.402938994 | 0.159 | 0.22 | 1 |
| R3hcc1l | 0.130222072 | 0.265507374 | 0.278 | 0.202 | 1 |
| Ppm1a | 0.13045826 | -0.291976324 | 0.386 | 0.468 | 1 |
| Gmfb | 0.130617526 | 0.273961597 | 0.239 | 0.165 | 1 |
| Exoc5 | 0.130655289 | -0.295489611 | 0.432 | 0.532 | 1 |
| Ahdc1 | 0.130855311 | 0.270095868 | 0.233 | 0.156 | 1 |
| Sv2c | 0.130949832 | -0.332425456 | 0.295 | 0.367 | 1 |
| Ksr2.1 | 0.13152818 | -0.267560798 | 0.335 | 0.413 | 1 |
| Cyp2d22 | 0.131583718 | 0.357905105 | 0.136 | 0.083 | 1 |
| Ppp1r13b | 0.131619095 | 0.297578314 | 0.494 | 0.422 | 1 |
| Yars | 0.131661009 | -0.257880714 | 0.176 | 0.248 | 1 |
| Id3 | 0.132211852 | 0.336344485 | 0.278 | 0.202 | 1 |
| Msantd2 | 0.132253585 | 0.35834587 | 0.307 | 0.239 | 1 |
| Wapl | 0.132380876 | -0.466816105 | 0.477 | 0.541 | 1 |
| Abca8a | 0.132559283 | 0.329933966 | 0.182 | 0.119 | 1 |
| Ap2m1 | 0.132709609 | -0.479405562 | 0.142 | 0.202 | 1 |
| Farp1 | 0.132805261 | 0.343185186 | 0.42 | 0.33 | 1 |
| Slco3a1 | 0.132949801 | 0.261309955 | 0.438 | 0.367 | 1 |
| Slc46a3 | 0.132963649 | -0.250059117 | 0.068 | 0.119 | 1 |
| Mettl2 | 0.133435729 | 0.28245438 | 0.125 | 0.073 | 1 |
| Cep350 | 0.13357673 | 0.331650216 | 0.46 | 0.385 | 1 |
| Hbb-bs | 0.133743219 | 2.613395044 | 0.068 | 0.119 | 1 |
| Cap2 | 0.134033331 | -0.278833296 | 0.449 | 0.523 | 1 |
| Rptor | 0.134168114 | -0.331090872 | 0.403 | 0.486 | 1 |
| Syt6 | 0.134225105 | -0.318819134 | 0.222 | 0.294 | 1 |
| Foxn2 | 0.134648642 | 0.362983687 | 0.227 | 0.165 | 1 |
| Ankrd13b | 0.134868212 | 0.306510638 | 0.148 | 0.092 | 1 |
| Gm37240 | 0.135080481 | -0.304824747 | 0.364 | 0.413 | 1 |
| Chchd4 | 0.135300103 | -0.346898848 | 0.062 | 0.11 | 1 |
| Nrros | 0.135300103 | -0.310802801 | 0.062 | 0.11 | 1 |
| Dgat1 | 0.135538065 | 0.263500131 | 0.148 | 0.092 | 1 |
| Rasip1 | 0.135835049 | 0.369059903 | 0.199 | 0.138 | 1 |
| Tmem241 | 0.136038609 | -0.32313684 | 0.091 | 0.147 | 1 |
| Grina | 0.136042667 | -0.42406698 | 0.318 | 0.394 | 1 |
| Uap1 | 0.136810239 | 0.269332613 | 0.182 | 0.119 | 1 |
| Tsc2 | 0.137233545 | -0.291795548 | 0.08 | 0.128 | 1 |
| Calr | 0.13783056 | -0.295824909 | 0.307 | 0.385 | 1 |
| Vamp2 | 0.138351347 | 0.295687278 | 0.273 | 0.202 | 1 |
| Klhl13 | 0.138810508 | -0.270275069 | 0.256 | 0.33 | 1 |
| Brinp1 | 0.139314005 | -0.346752043 | 0.466 | 0.505 | 1 |
| Psmd8 | 0.139442976 | -0.280156174 | 0.062 | 0.11 | 1 |
| Pogz | 0.139614411 | -0.304166542 | 0.284 | 0.358 | 1 |
| Pde8a | 0.139826754 | 0.312490713 | 0.489 | 0.431 | 1 |
| Nudt9 | 0.140283148 | -0.294184141 | 0.062 | 0.11 | 1 |
| Cd200 | 0.140607441 | -0.560491193 | 0.244 | 0.312 | 1 |
| Ubap2 | 0.140881873 | -0.257274204 | 0.261 | 0.339 | 1 |
| Gm48765 | 0.141469865 | -0.276636318 | 0.125 | 0.183 | 1 |
| Kcnq3 | 0.141813504 | -0.264714649 | 0.466 | 0.55 | 1 |
| Por | 0.141917859 | 0.355579298 | 0.256 | 0.193 | 1 |
| Ppp1r8 | 0.142827033 | -0.296938575 | 0.062 | 0.11 | 1 |
| Tcp11l1 | 0.143000399 | 0.259413787 | 0.199 | 0.138 | 1 |
| Drg1 | 0.143023109 | -0.295493007 | 0.381 | 0.44 | 1 |
| Ybx1 | 0.145412432 | -0.412072096 | 0.358 | 0.413 | 1 |
| Ispd | 0.146035303 | 0.354894047 | 0.256 | 0.193 | 1 |
| Arpp19 | 0.146041483 | -0.401954709 | 0.455 | 0.514 | 1 |
| Rab3c | 0.146721112 | -0.304563774 | 0.398 | 0.45 | 1 |
| Ctnnb1 | 0.147380254 | 0.302329566 | 0.506 | 0.44 | 1 |
| Ankrd16 | 0.147634697 | 0.265330897 | 0.125 | 0.073 | 1 |
| Dip2b | 0.147785385 | 0.285058291 | 0.551 | 0.477 | 1 |
| Limk2 | 0.147906648 | 0.271697222 | 0.256 | 0.183 | 1 |
| Anks1 | 0.148035215 | -0.332693579 | 0.301 | 0.385 | 1 |
| Pigu | 0.148046441 | -0.27672606 | 0.17 | 0.239 | 1 |
| Naa35 | 0.148578966 | 0.381532348 | 0.267 | 0.202 | 1 |
| Smc3 | 0.149271907 | -0.271104324 | 0.278 | 0.349 | 1 |
| Tnpo3 | 0.149322047 | -0.480097764 | 0.352 | 0.431 | 1 |
| Tmem246 | 0.149362498 | -0.342583359 | 0.08 | 0.128 | 1 |
| Wipf3 | 0.149994889 | -0.336575227 | 0.244 | 0.321 | 1 |
| Caml | 0.150347021 | -0.43159132 | 0.131 | 0.193 | 1 |
| Hectd1 | 0.150783802 | -0.353284666 | 0.364 | 0.44 | 1 |
| Npas3 | 0.15158805 | 0.368607276 | 0.335 | 0.266 | 1 |
| Naa40 | 0.15182584 | -0.314846157 | 0.278 | 0.339 | 1 |
| Celf6 | 0.152261235 | -0.316893081 | 0.074 | 0.119 | 1 |
| Tmem70 | 0.152350557 | -0.365944436 | 0.085 | 0.138 | 1 |
| Cox11 | 0.152350557 | -0.273009992 | 0.085 | 0.138 | 1 |
| Pcsk1n | 0.15238115 | -0.47269833 | 0.352 | 0.394 | 1 |
| Hspa12b | 0.152751277 | 0.33052298 | 0.239 | 0.174 | 1 |
| Colec12 | 0.152829684 | 0.593428429 | 0.324 | 0.257 | 1 |
| Thsd7a | 0.154374594 | -0.281937856 | 0.534 | 0.596 | 1 |
| Tenm3 | 0.154739355 | 0.318558062 | 0.534 | 0.431 | 1 |
| CT025619.2 | 0.155719531 | 0.321634351 | 0.341 | 0.266 | 1 |
| Ly6c1 | 0.155719611 | 0.529357873 | 0.341 | 0.266 | 1 |
| Fam117b | 0.155962741 | -0.426657942 | 0.426 | 0.486 | 1 |
| Ermard | 0.156297836 | 0.311741991 | 0.33 | 0.257 | 1 |
| Rnf7 | 0.156370051 | 0.305703865 | 0.136 | 0.083 | 1 |
| Sri | 0.15676397 | 0.292755188 | 0.216 | 0.156 | 1 |
| Cdk5r1 | 0.156766057 | 0.551752334 | 0.267 | 0.202 | 1 |
| Pwwp2a | 0.156779246 | 0.403859235 | 0.375 | 0.33 | 1 |
| Plekha1 | 0.157866323 | 0.309453126 | 0.42 | 0.358 | 1 |
| Trappc8 | 0.15801296 | 0.257527806 | 0.42 | 0.339 | 1 |
| Gsk3b | 0.158430384 | -0.280066563 | 0.761 | 0.807 | 1 |
| Kdm5b | 0.159024284 | -0.452478349 | 0.307 | 0.385 | 1 |
| Rpl7 | 0.15915773 | -0.389608341 | 0.199 | 0.266 | 1 |
| Rbm4b | 0.15915773 | -0.275000338 | 0.199 | 0.266 | 1 |
| Lrfn5 | 0.160055003 | -0.316841225 | 0.54 | 0.596 | 1 |
| Akirin2 | 0.16007877 | -0.425536966 | 0.188 | 0.248 | 1 |
| Simc1 | 0.160609275 | 0.251104493 | 0.176 | 0.119 | 1 |
| Syt9 | 0.161226518 | 0.284283229 | 0.119 | 0.073 | 1 |
| Ccni | 0.16148848 | -0.330024089 | 0.284 | 0.367 | 1 |
| Man2a2 | 0.161650471 | 0.257820006 | 0.29 | 0.22 | 1 |
| Ift43 | 0.162660262 | 0.3012096 | 0.222 | 0.165 | 1 |
| Gatm | 0.163600493 | 0.255570251 | 0.557 | 0.477 | 1 |
| Kdm5c | 0.163807035 | 0.275041309 | 0.335 | 0.266 | 1 |
| Ctsh | 0.164877827 | 0.274117742 | 0.199 | 0.138 | 1 |
| Prickle2 | 0.165119983 | 0.354211923 | 0.562 | 0.523 | 1 |
| St18 | 0.16513555 | 0.350348064 | 0.369 | 0.312 | 1 |
| Kdm4a | 0.165590885 | -0.292686764 | 0.102 | 0.156 | 1 |
| Zfp639 | 0.166204344 | 0.279815381 | 0.188 | 0.128 | 1 |
| Dpp10 | 0.166308869 | -0.369000148 | 0.438 | 0.505 | 1 |
| Rarb | 0.166538269 | -0.271959881 | 0.551 | 0.606 | 1 |
| Med12l | 0.166905225 | -0.250394617 | 0.375 | 0.459 | 1 |
| Slc25a4 | 0.166926543 | -0.334539591 | 0.381 | 0.44 | 1 |
| Prpf6 | 0.167473582 | -0.289646774 | 0.267 | 0.33 | 1 |
| Atp13a5 | 0.167791909 | 0.367542936 | 0.33 | 0.248 | 1 |
| Rab15 | 0.168630619 | -0.280723164 | 0.153 | 0.22 | 1 |
| Cecr2 | 0.168702979 | 0.331679147 | 0.165 | 0.11 | 1 |
| Ckb | 0.168859074 | -0.588816629 | 0.659 | 0.688 | 1 |
| Wdr92 | 0.169983863 | -0.438369278 | 0.091 | 0.138 | 1 |
| Bsg | 0.170376336 | 0.707778288 | 0.585 | 0.541 | 1 |
| Rufy3 | 0.17054063 | -0.374056103 | 0.364 | 0.44 | 1 |
| Rpl18 | 0.170659585 | -0.390016352 | 0.193 | 0.248 | 1 |
| Tm9sf4 | 0.170724765 | -0.364779804 | 0.25 | 0.312 | 1 |
| Nono | 0.171157806 | -0.394477602 | 0.188 | 0.248 | 1 |
| Ankrd17 | 0.171417641 | -0.287140501 | 0.659 | 0.679 | 1 |
| Nenf | 0.172879896 | -0.278538939 | 0.114 | 0.165 | 1 |
| Slitrk4 | 0.172939202 | -0.377670132 | 0.097 | 0.147 | 1 |
| Cnot1 | 0.173123183 | 0.255744894 | 0.46 | 0.376 | 1 |
| Reln | 0.173196911 | -0.478534899 | 0.295 | 0.339 | 1 |
| Emc10 | 0.173468014 | -0.379893233 | 0.233 | 0.294 | 1 |
| Onecut2 | 0.173715131 | -0.257703073 | 0.159 | 0.22 | 1 |
| Emc7 | 0.173925271 | -0.444486015 | 0.239 | 0.312 | 1 |
| Zfp420 | 0.17460092 | -0.288064882 | 0.074 | 0.119 | 1 |
| Eif3j1 | 0.174685229 | -0.296034873 | 0.199 | 0.266 | 1 |
| Strn4 | 0.176040443 | 0.331779824 | 0.29 | 0.229 | 1 |
| Tspyl2 | 0.176457169 | -0.266820583 | 0.119 | 0.174 | 1 |
| Zbtb4 | 0.176820801 | 0.279753903 | 0.273 | 0.211 | 1 |
| Ik | 0.17685817 | -0.339493684 | 0.114 | 0.165 | 1 |
| Gpr88 | 0.17756555 | -0.407088569 | 0.562 | 0.606 | 1 |
| Grip1 | 0.178699374 | 0.27848935 | 0.483 | 0.422 | 1 |
| Xkr6 | 0.180085822 | -0.3395169 | 0.392 | 0.422 | 1 |
| Ankrd33b | 0.18023661 | -0.295566313 | 0.216 | 0.294 | 1 |
| Arhgap21 | 0.18052832 | 0.312506233 | 0.494 | 0.404 | 1 |
| Klhl3 | 0.180939534 | -0.309936294 | 0.25 | 0.312 | 1 |
| Mmp28 | 0.181572983 | 0.379909252 | 0.142 | 0.092 | 1 |
| Adap2os | 0.182221087 | -0.374281222 | 0.091 | 0.138 | 1 |
| Clvs1 | 0.182612486 | -0.337130239 | 0.381 | 0.422 | 1 |
| Tshz1 | 0.182712049 | -0.435678522 | 0.273 | 0.321 | 1 |
| Fyn | 0.183019615 | 0.292513546 | 0.438 | 0.385 | 1 |
| Ints10 | 0.183351534 | 0.341587006 | 0.284 | 0.22 | 1 |
| Tmem167 | 0.183679553 | -0.40908164 | 0.381 | 0.431 | 1 |
| Kbtbd2 | 0.183739929 | -0.255383976 | 0.136 | 0.193 | 1 |
| Pkm | 0.184093859 | -0.459657749 | 0.477 | 0.532 | 1 |
| Sun1 | 0.184536855 | -0.324044862 | 0.256 | 0.33 | 1 |
| Gm13919 | 0.185220913 | 0.254067682 | 0.119 | 0.073 | 1 |
| Kcnt1 | 0.185260658 | -0.310830591 | 0.205 | 0.248 | 1 |
| St3gal6 | 0.185944718 | 0.383583071 | 0.347 | 0.275 | 1 |
| Kcna4 | 0.186032388 | -0.282839856 | 0.222 | 0.284 | 1 |
| Fkbp3 | 0.186774809 | -0.375081198 | 0.159 | 0.211 | 1 |
| Minos1 | 0.187029388 | -0.305725642 | 0.17 | 0.229 | 1 |
| Klhl8 | 0.187274529 | -0.320589355 | 0.119 | 0.174 | 1 |
| 4833439L19Rik | 0.18752033 | -0.344244054 | 0.114 | 0.165 | 1 |
| Mpp6 | 0.188266744 | -0.3150922 | 0.392 | 0.431 | 1 |
| Efna5 | 0.188552667 | 0.376464807 | 0.278 | 0.22 | 1 |
| Hn1 | 0.189130962 | -0.287175036 | 0.074 | 0.119 | 1 |
| Abcc5 | 0.189341871 | -0.28907603 | 0.392 | 0.459 | 1 |
| Tiam1 | 0.189640951 | -0.341919619 | 0.335 | 0.394 | 1 |
| Dcaf8 | 0.189647342 | 0.267173748 | 0.352 | 0.294 | 1 |
| Tspan2 | 0.18981764 | 0.25546463 | 0.312 | 0.239 | 1 |
| Napg | 0.189861802 | 0.270507022 | 0.227 | 0.165 | 1 |
| Ric8a | 0.191356961 | -0.341779307 | 0.068 | 0.11 | 1 |
| Plekhg1 | 0.191628847 | 0.28840284 | 0.415 | 0.349 | 1 |
| Lipe | 0.192576466 | -0.348082122 | 0.108 | 0.156 | 1 |
| Lingo2 | 0.192594902 | -0.34451116 | 0.591 | 0.587 | 1 |
| Atp11c | 0.192606092 | 0.274268797 | 0.46 | 0.385 | 1 |
| Kdm6a | 0.193246158 | -0.441337096 | 0.426 | 0.45 | 1 |
| Fbxl7 | 0.193459352 | 0.310029667 | 0.284 | 0.211 | 1 |
| Prkcz | 0.193576917 | -0.286592046 | 0.335 | 0.404 | 1 |
| Frmd6 | 0.194476866 | 0.259359501 | 0.324 | 0.266 | 1 |
| Spata7 | 0.19454992 | -0.374353604 | 0.176 | 0.229 | 1 |
| Lrrc40 | 0.195249085 | 0.253802187 | 0.165 | 0.11 | 1 |
| Mindy3 | 0.195396336 | 0.270671487 | 0.295 | 0.229 | 1 |
| Notch1 | 0.195529909 | 0.373393304 | 0.307 | 0.248 | 1 |
| Glp2r | 0.19625826 | -0.256524755 | 0.301 | 0.349 | 1 |
| Tox4 | 0.196617674 | 0.287832801 | 0.21 | 0.156 | 1 |
| Kcnt2 | 0.196969021 | 0.354111947 | 0.273 | 0.211 | 1 |
| Dcaf5 | 0.197626334 | 0.324218171 | 0.324 | 0.266 | 1 |
| Zic4 | 0.199125586 | 0.358435109 | 0.142 | 0.092 | 1 |
| Kctd8 | 0.199900032 | -0.489567666 | 0.438 | 0.477 | 1 |
| Ankle2 | 0.200444241 | -0.384786629 | 0.142 | 0.193 | 1 |
| Nrcam | 0.200835664 | -0.42635578 | 0.409 | 0.468 | 1 |
| Ncam2 | 0.201851869 | -0.398222576 | 0.562 | 0.615 | 1 |
| Elf1 | 0.201959778 | 0.309358869 | 0.312 | 0.248 | 1 |
| Hacd2 | 0.20209841 | -0.283533419 | 0.205 | 0.275 | 1 |
| Gm2163 | 0.202405102 | -0.307533458 | 0.273 | 0.33 | 1 |
| Sgsm3 | 0.203221841 | 0.273421607 | 0.148 | 0.101 | 1 |
| Rab3a | 0.203690324 | -0.255228451 | 0.17 | 0.229 | 1 |
| Wdr45b | 0.204254807 | 0.276546584 | 0.216 | 0.165 | 1 |
| Ptp4a2 | 0.20434295 | -0.41755217 | 0.398 | 0.459 | 1 |
| Arhgap23 | 0.20529333 | 0.267376931 | 0.483 | 0.422 | 1 |
| Cd9 | 0.20553494 | 0.272264602 | 0.205 | 0.147 | 1 |
| Abhd12 | 0.206469872 | -0.284268973 | 0.227 | 0.294 | 1 |
| Cep95 | 0.206841891 | 0.257369297 | 0.148 | 0.101 | 1 |
| Rnf13 | 0.207063383 | -0.25402962 | 0.438 | 0.486 | 1 |
| Ammecr1 | 0.207390946 | -0.294862304 | 0.256 | 0.321 | 1 |
| Trappc13 | 0.207802339 | -0.255294292 | 0.176 | 0.239 | 1 |
| Skap2 | 0.207876985 | 0.357844251 | 0.176 | 0.128 | 1 |
| Plekha8 | 0.208681923 | -0.304702142 | 0.085 | 0.128 | 1 |
| Zbtb16 | 0.209458268 | -0.458550446 | 0.25 | 0.303 | 1 |
| Ndrg3 | 0.209471954 | -0.367377773 | 0.307 | 0.367 | 1 |
| Tm2d2 | 0.209704195 | -0.456084558 | 0.085 | 0.128 | 1 |
| Actg1 | 0.211874222 | -0.404495632 | 0.443 | 0.505 | 1 |
| Rhobtb2 | 0.212193178 | -0.453458252 | 0.256 | 0.312 | 1 |
| Odf2l | 0.213289196 | -0.396756783 | 0.114 | 0.156 | 1 |
| Ptprj | 0.213462136 | 0.273028521 | 0.5 | 0.431 | 1 |
| Tec | 0.213829542 | -0.307964978 | 0.085 | 0.128 | 1 |
| Hspe1 | 0.214411869 | -0.323370359 | 0.062 | 0.101 | 1 |
| Calcrl | 0.215484022 | 0.276561841 | 0.273 | 0.211 | 1 |
| Chchd10 | 0.2155757 | -0.400517897 | 0.136 | 0.183 | 1 |
| Cdh5 | 0.215845126 | 0.26144051 | 0.273 | 0.211 | 1 |
| Trub1 | 0.216666593 | 0.271311844 | 0.125 | 0.083 | 1 |
| Ssr3 | 0.217208481 | 0.401981637 | 0.261 | 0.211 | 1 |
| Ctdspl2 | 0.218538372 | 0.356076337 | 0.381 | 0.33 | 1 |
| Dennd1b | 0.218794386 | -0.360021664 | 0.449 | 0.486 | 1 |
| Gabbr1 | 0.2199172 | -0.464826469 | 0.494 | 0.55 | 1 |
| Nampt | 0.21997289 | -0.304198395 | 0.205 | 0.266 | 1 |
| Sipa1l2 | 0.220153805 | 0.275618522 | 0.199 | 0.147 | 1 |
| Hip1 | 0.22066141 | 0.283886075 | 0.619 | 0.56 | 1 |
| Yeats2 | 0.220722417 | -0.284635278 | 0.278 | 0.339 | 1 |
| Cyld | 0.221500303 | -0.361330659 | 0.511 | 0.55 | 1 |
| 2310035C23Rik | 0.221711386 | 0.307917194 | 0.477 | 0.413 | 1 |
| Trank1 | 0.222573928 | 0.272898575 | 0.398 | 0.367 | 1 |
| Ldlrad4 | 0.22546634 | 0.301595283 | 0.653 | 0.569 | 1 |
| Lrpprc | 0.225757306 | 0.263214562 | 0.267 | 0.22 | 1 |
| Adcyap1r1 | 0.226362308 | -0.402951136 | 0.102 | 0.147 | 1 |
| Cstb | 0.226494822 | -0.26430883 | 0.08 | 0.119 | 1 |
| Idh3a | 0.226494822 | -0.41182408 | 0.08 | 0.119 | 1 |
| Chordc1 | 0.227524283 | -0.251383703 | 0.239 | 0.294 | 1 |
| Ogfrl1 | 0.22788945 | -0.393692403 | 0.17 | 0.22 | 1 |
| Slc30a6 | 0.228747845 | 0.452689818 | 0.159 | 0.11 | 1 |
| Atg4d | 0.228907935 | -0.257826368 | 0.062 | 0.101 | 1 |
| Adarb2 | 0.229064245 | -0.433319653 | 0.216 | 0.266 | 1 |
| Cebpg | 0.229906935 | -0.298297439 | 0.119 | 0.165 | 1 |
| Rgs7bp | 0.230511103 | -0.286297946 | 0.562 | 0.578 | 1 |
| Nomo1 | 0.231753461 | -0.305058494 | 0.125 | 0.174 | 1 |
| Sst | 0.232258265 | -0.333528042 | 0.261 | 0.33 | 1 |
| Hipk2 | 0.232982026 | -0.264788804 | 0.381 | 0.45 | 1 |
| Atp5g1 | 0.233334138 | -0.262125939 | 0.159 | 0.211 | 1 |
| Ubl3 | 0.233399496 | -0.260553619 | 0.528 | 0.578 | 1 |
| Smchd1 | 0.234015872 | 0.393434 | 0.392 | 0.33 | 1 |
| Abcb1a | 0.23576141 | 0.306256834 | 0.347 | 0.294 | 1 |
| Ergic1 | 0.2365901 | -0.352530217 | 0.21 | 0.266 | 1 |
| Tomm70a | 0.237941766 | -0.257386304 | 0.409 | 0.468 | 1 |
| Pola1 | 0.238417621 | -0.437656339 | 0.239 | 0.284 | 1 |
| Col6a1 | 0.238662236 | -0.3167507 | 0.193 | 0.248 | 1 |
| Stk38 | 0.238890054 | -0.325017036 | 0.42 | 0.468 | 1 |
| Uxs1 | 0.23919345 | -0.334064012 | 0.165 | 0.211 | 1 |
| Ddn | 0.240376879 | -0.321300452 | 0.125 | 0.174 | 1 |
| Tnrc6c | 0.241510302 | -0.279274279 | 0.705 | 0.688 | 1 |
| Gm26883 | 0.241572529 | -0.421577491 | 0.205 | 0.257 | 1 |
| Lztfl1 | 0.242379794 | -0.279561812 | 0.193 | 0.248 | 1 |
| Prex2 | 0.243037432 | 0.35500177 | 0.562 | 0.578 | 1 |
| Gripap1 | 0.243066263 | -0.280914233 | 0.318 | 0.376 | 1 |
| Nrxn3 | 0.243565379 | -0.356878312 | 0.92 | 0.844 | 1 |
| Tuba4a | 0.244609797 | -0.344619641 | 0.114 | 0.156 | 1 |
| Lhfpl2 | 0.244705086 | 0.364650743 | 0.216 | 0.174 | 1 |
| Pex5l | 0.245334685 | 0.305041664 | 0.432 | 0.376 | 1 |
| Amd1 | 0.245645459 | 0.292029536 | 0.153 | 0.11 | 1 |
| Fam120b | 0.246046199 | -0.308641652 | 0.33 | 0.376 | 1 |
| Enpp4 | 0.24610271 | 0.25581666 | 0.136 | 0.092 | 1 |
| Paqr8 | 0.246653614 | -0.344097561 | 0.119 | 0.165 | 1 |
| Ubn2 | 0.246776997 | 0.257988386 | 0.67 | 0.596 | 1 |
| Ap4e1 | 0.247146169 | 0.262455105 | 0.21 | 0.165 | 1 |
| Wtap | 0.249330804 | -0.259631497 | 0.159 | 0.211 | 1 |
| Bmpr1a | 0.249396728 | 0.302820536 | 0.358 | 0.303 | 1 |
| Dmd | 0.249506625 | 0.289270849 | 0.722 | 0.651 | 1 |
| Selenom | 0.249797994 | -0.30858484 | 0.188 | 0.239 | 1 |
| Gab3 | 0.250109655 | -0.274980467 | 0.085 | 0.128 | 1 |
| Plcb4 | 0.250384091 | 0.26787039 | 0.426 | 0.349 | 1 |
| Pianp | 0.252064993 | -0.283627771 | 0.193 | 0.248 | 1 |
| Rpap2 | 0.252580105 | -0.26388856 | 0.102 | 0.147 | 1 |
| Cap1 | 0.252850208 | 0.25852945 | 0.295 | 0.229 | 1 |
| Mllt11 | 0.254635465 | -0.340150368 | 0.193 | 0.248 | 1 |
| Fign | 0.25487984 | 0.313470771 | 0.199 | 0.156 | 1 |
| Gm28375 | 0.254881455 | -0.278233904 | 0.188 | 0.229 | 1 |
| Arhgap12 | 0.255019462 | 0.265690319 | 0.375 | 0.321 | 1 |
| Gm45881 | 0.255033102 | -0.292316159 | 0.199 | 0.248 | 1 |
| Ccdc117 | 0.255432202 | -0.312575967 | 0.097 | 0.138 | 1 |
| Ncdn | 0.256188246 | -0.372959043 | 0.307 | 0.349 | 1 |
| Ak6 | 0.256459262 | 0.251108316 | 0.102 | 0.064 | 1 |
| Cystm1 | 0.256581588 | -0.254975919 | 0.153 | 0.211 | 1 |
| Lamc1 | 0.258091862 | 0.296061583 | 0.477 | 0.422 | 1 |
| Ndufc2 | 0.260419122 | -0.431275882 | 0.165 | 0.211 | 1 |
| Dse | 0.261040528 | 0.254269809 | 0.114 | 0.073 | 1 |
| Usp54 | 0.26117807 | -0.255608074 | 0.386 | 0.45 | 1 |
| H3f3b | 0.261228778 | 0.325972872 | 0.438 | 0.385 | 1 |
| Nars | 0.262141779 | -0.337458852 | 0.131 | 0.174 | 1 |
| Fndc1 | 0.262257367 | 0.320919411 | 0.114 | 0.073 | 1 |
| Scfd2 | 0.263930885 | 0.250711271 | 0.33 | 0.284 | 1 |
| Susd4 | 0.264045903 | -0.36375995 | 0.278 | 0.321 | 1 |
| Pld3 | 0.264656985 | -0.505731243 | 0.193 | 0.248 | 1 |
| Gabrb1 | 0.265269022 | -0.301128629 | 0.551 | 0.569 | 1 |
| Ngly1 | 0.266618624 | 0.255455123 | 0.244 | 0.202 | 1 |
| Lactb2 | 0.266841483 | -0.317309151 | 0.114 | 0.156 | 1 |
| Scand1 | 0.267427351 | -0.273345574 | 0.119 | 0.165 | 1 |
| Ppt2 | 0.268011929 | -0.371536649 | 0.108 | 0.147 | 1 |
| Nfkbia | 0.268205659 | 0.280480456 | 0.233 | 0.183 | 1 |
| Khdrbs2 | 0.268355712 | -0.414948159 | 0.295 | 0.33 | 1 |
| Ptprn2 | 0.2693063 | -0.297954595 | 0.443 | 0.486 | 1 |
| Dennd6a | 0.269474106 | -0.291520295 | 0.432 | 0.495 | 1 |
| Emc2 | 0.269803365 | 0.270250348 | 0.25 | 0.202 | 1 |
| Gm38393 | 0.27140849 | -0.28017641 | 0.307 | 0.349 | 1 |
| E130102H24Rik | 0.271603902 | 0.256702751 | 0.205 | 0.156 | 1 |
| Fbxo34 | 0.271603902 | -0.308578706 | 0.17 | 0.211 | 1 |
| Sec11a | 0.272122673 | -0.258334811 | 0.222 | 0.275 | 1 |
| Fkbp9 | 0.275131742 | 0.278801636 | 0.131 | 0.092 | 1 |
| Ube4b | 0.275518617 | -0.262908549 | 0.386 | 0.45 | 1 |
| Hs3st5 | 0.27604701 | -0.329018689 | 0.295 | 0.339 | 1 |
| Tmem234 | 0.276086724 | 0.304300145 | 0.295 | 0.248 | 1 |
| Pgam1 | 0.277839753 | -0.432520256 | 0.148 | 0.183 | 1 |
| Cops2 | 0.279621111 | -0.41961897 | 0.142 | 0.183 | 1 |
| Fzd4 | 0.281698938 | -0.266941074 | 0.142 | 0.183 | 1 |
| Gad1 | 0.283104082 | -0.408458812 | 0.341 | 0.376 | 1 |
| Wasf1 | 0.285140238 | -0.414663771 | 0.415 | 0.459 | 1 |
| Pltp | 0.2864806 | 0.374144543 | 0.358 | 0.321 | 1 |
| Heatr3 | 0.28742917 | -0.379309553 | 0.21 | 0.248 | 1 |
| Phldb2 | 0.288044244 | -0.269183112 | 0.352 | 0.275 | 1 |
| Ttc28 | 0.289599628 | 0.445680761 | 0.426 | 0.394 | 1 |
| Gramd3 | 0.290389646 | 0.275327364 | 0.17 | 0.128 | 1 |
| Lef1 | 0.290696244 | 0.304062245 | 0.415 | 0.358 | 1 |
| Rheb | 0.292150758 | 0.30165151 | 0.358 | 0.303 | 1 |
| 4931406P16Rik | 0.292332553 | 0.255829432 | 0.523 | 0.486 | 1 |
| Lsamp | 0.292947511 | -0.254244942 | 0.932 | 0.927 | 1 |
| Slc25a46 | 0.295169179 | -0.257978567 | 0.159 | 0.211 | 1 |
| Zdhhc13 | 0.295614395 | -0.292281426 | 0.074 | 0.11 | 1 |
| Aimp1 | 0.297040175 | -0.253651297 | 0.108 | 0.147 | 1 |
| Gm28905 | 0.297353173 | -0.323155444 | 0.324 | 0.367 | 1 |
| Lgals8 | 0.297380869 | 0.288237679 | 0.108 | 0.073 | 1 |
| Ankrd52 | 0.297426007 | -0.300723444 | 0.125 | 0.165 | 1 |
| Tubb2a | 0.298515089 | -0.390932622 | 0.205 | 0.248 | 1 |
| Fam110b | 0.299519166 | -0.32692463 | 0.415 | 0.45 | 1 |
| D10Wsu102e | 0.300005504 | 0.294703849 | 0.244 | 0.202 | 1 |
| Ppargc1a | 0.30026022 | -0.328985496 | 0.222 | 0.266 | 1 |
| Caprin1 | 0.301384408 | -0.290330687 | 0.426 | 0.477 | 1 |
| Sec24a | 0.301713676 | 0.282295627 | 0.324 | 0.284 | 1 |
| Slc25a22 | 0.302338629 | -0.293533809 | 0.102 | 0.138 | 1 |
| C230088H06Rik | 0.304620544 | -0.432659621 | 0.085 | 0.119 | 1 |
| Akap6 | 0.304787321 | -0.321410062 | 0.506 | 0.56 | 1 |
| Zfyve1 | 0.305413032 | -0.267825153 | 0.29 | 0.33 | 1 |
| Hpca | 0.305682975 | -0.358871485 | 0.364 | 0.404 | 1 |
| Rnf34 | 0.306032335 | -0.389691148 | 0.182 | 0.229 | 1 |
| 1110004F10Rik | 0.306146748 | -0.367210495 | 0.21 | 0.257 | 1 |
| Amotl1 | 0.306673754 | 0.264221342 | 0.21 | 0.174 | 1 |
| Mblac2 | 0.30691806 | 0.345700788 | 0.25 | 0.211 | 1 |
| Spock1 | 0.307088032 | 0.268485458 | 0.409 | 0.385 | 1 |
| Fam120c | 0.30928118 | -0.264334453 | 0.284 | 0.339 | 1 |
| Tie1 | 0.309373905 | 0.295199074 | 0.159 | 0.119 | 1 |
| Fam129a | 0.310077496 | 0.265562617 | 0.148 | 0.11 | 1 |
| Sumo1 | 0.311302016 | -0.288994388 | 0.398 | 0.431 | 1 |
| Hexb | 0.311414931 | -0.294423305 | 0.085 | 0.119 | 1 |
| Cdh13 | 0.312312026 | -0.308173442 | 0.29 | 0.33 | 1 |
| Stt3b | 0.312526454 | -0.361479693 | 0.278 | 0.312 | 1 |
| Cct7 | 0.312965943 | -0.301602611 | 0.165 | 0.211 | 1 |
| Cox8a | 0.31336075 | -0.320723858 | 0.386 | 0.44 | 1 |
| Arhgef15 | 0.314613472 | 0.252002021 | 0.216 | 0.174 | 1 |
| Pglyrp1 | 0.316799993 | 0.29810553 | 0.188 | 0.147 | 1 |
| Ccser2 | 0.316964553 | 0.272369937 | 0.426 | 0.376 | 1 |
| Eloc | 0.317146739 | -0.456679656 | 0.176 | 0.211 | 1 |
| Erc2 | 0.318393629 | -0.302798184 | 0.574 | 0.587 | 1 |
| Actr3b | 0.319376793 | -0.341577456 | 0.267 | 0.303 | 1 |
| Bcan | 0.319699125 | -0.335000563 | 0.085 | 0.119 | 1 |
| Sugt1 | 0.319823604 | -0.282303087 | 0.205 | 0.248 | 1 |
| Nlgn1 | 0.320199318 | -0.316223752 | 0.864 | 0.826 | 1 |
| Elavl3 | 0.321109077 | -0.297750367 | 0.301 | 0.367 | 1 |
| Nop58 | 0.323918492 | -0.333870775 | 0.097 | 0.128 | 1 |
| 9330159F19Rik | 0.324708334 | -0.30240972 | 0.21 | 0.248 | 1 |
| Tek | 0.325682018 | 0.287696394 | 0.352 | 0.303 | 1 |
| Slc39a11 | 0.325883918 | -0.39509514 | 0.148 | 0.183 | 1 |
| Rnf144b | 0.326108719 | 0.30741897 | 0.29 | 0.248 | 1 |
| Cbl | 0.326387682 | -0.275938573 | 0.381 | 0.44 | 1 |
| Ttc19 | 0.326592995 | -0.29857929 | 0.375 | 0.404 | 1 |
| Gatsl2 | 0.327241965 | -0.373546614 | 0.159 | 0.193 | 1 |
| Wrnip1 | 0.328126164 | -0.330653673 | 0.085 | 0.119 | 1 |
| Sumo2 | 0.330163927 | -0.273977107 | 0.398 | 0.44 | 1 |
| Grb14 | 0.331542416 | 0.317950564 | 0.369 | 0.339 | 1 |
| Zfp81 | 0.331571397 | 0.258910032 | 0.153 | 0.119 | 1 |
| Pcsk2 | 0.33157666 | -0.287150868 | 0.5 | 0.514 | 1 |
| Notch2 | 0.331799489 | 0.291876753 | 0.159 | 0.119 | 1 |
| Map6d1 | 0.332200456 | -0.282484719 | 0.08 | 0.11 | 1 |
| Ostc | 0.333920686 | -0.286475582 | 0.119 | 0.156 | 1 |
| Serp2 | 0.334575883 | -0.304407601 | 0.199 | 0.239 | 1 |
| Snu13 | 0.335953174 | -0.374608623 | 0.114 | 0.147 | 1 |
| Actb | 0.336065505 | -0.316363309 | 0.699 | 0.761 | 1 |
| Brox | 0.336662535 | -0.3895022 | 0.153 | 0.193 | 1 |
| Pcbp1 | 0.337081044 | -0.356598302 | 0.21 | 0.257 | 1 |
| Fancl | 0.337648352 | -0.304200941 | 0.17 | 0.211 | 1 |
| Rab30 | 0.338765349 | 0.308642362 | 0.369 | 0.33 | 1 |
| Lca5 | 0.339403281 | -0.267928268 | 0.142 | 0.183 | 1 |
| Ddx10 | 0.342331725 | -0.283031224 | 0.256 | 0.294 | 1 |
| Prrg1 | 0.342373026 | 0.258863308 | 0.216 | 0.174 | 1 |
| Gm44593 | 0.343961678 | -0.305083521 | 0.21 | 0.248 | 1 |
| Osbp2 | 0.344686916 | -0.256114961 | 0.312 | 0.367 | 1 |
| Azi2 | 0.345326408 | 0.318118076 | 0.261 | 0.211 | 1 |
| Foxp2 | 0.345576541 | -0.307828005 | 0.528 | 0.541 | 1 |
| Apod | 0.346009672 | 0.362938628 | 0.318 | 0.275 | 1 |
| Prkaca | 0.346767314 | -0.251414577 | 0.148 | 0.183 | 1 |
| Kdm4b | 0.349895557 | -0.330023061 | 0.216 | 0.248 | 1 |
| Ly6e | 0.350496254 | 0.320095788 | 0.307 | 0.257 | 1 |
| Grk5 | 0.350724364 | 0.285317929 | 0.364 | 0.312 | 1 |
| Tspoap1 | 0.35229784 | 0.251506409 | 0.301 | 0.257 | 1 |
| Rpl41 | 0.352410701 | -0.25206228 | 0.403 | 0.45 | 1 |
| Trak2 | 0.353182525 | 0.331802169 | 0.244 | 0.211 | 1 |
| Stk32c | 0.353741715 | -0.357616856 | 0.193 | 0.229 | 1 |
| Efnb2 | 0.354228122 | -0.317944269 | 0.25 | 0.294 | 1 |
| Ap3d1 | 0.354342257 | -0.266870428 | 0.182 | 0.229 | 1 |
| Slc22a17 | 0.358380967 | -0.437849522 | 0.455 | 0.495 | 1 |
| Smg1 | 0.359566029 | -0.386652359 | 0.443 | 0.477 | 1 |
| Shprh | 0.361052621 | 0.27558712 | 0.369 | 0.33 | 1 |
| Ppp6c | 0.36142041 | 0.286804889 | 0.278 | 0.239 | 1 |
| Armc1 | 0.363017821 | -0.281578797 | 0.165 | 0.202 | 1 |
| Gmps | 0.364297777 | -0.251582136 | 0.199 | 0.239 | 1 |
| Syf2 | 0.365581406 | -0.31829406 | 0.125 | 0.156 | 1 |
| Hdac9 | 0.36562757 | -0.382386411 | 0.398 | 0.431 | 1 |
| Lrrtm1 | 0.366536618 | -0.368842623 | 0.097 | 0.128 | 1 |
| Pbx2 | 0.366642059 | -0.327010504 | 0.074 | 0.101 | 1 |
| Tpm1 | 0.367502763 | -0.323434418 | 0.364 | 0.385 | 1 |
| Slc25a33 | 0.368001821 | 0.265921523 | 0.125 | 0.174 | 1 |
| Dync1li2 | 0.368400065 | -0.320431082 | 0.318 | 0.349 | 1 |
| Napb | 0.368631866 | -0.411777343 | 0.295 | 0.33 | 1 |
| Mark1 | 0.369599988 | -0.308627805 | 0.409 | 0.459 | 1 |
| Rab21 | 0.369983561 | -0.55688981 | 0.244 | 0.275 | 1 |
| C2cd3 | 0.371633714 | -0.253128345 | 0.216 | 0.257 | 1 |
| Ndnf | 0.373148834 | 0.494232046 | 0.165 | 0.128 | 1 |
| Snw1 | 0.373790453 | -0.355278637 | 0.222 | 0.257 | 1 |
| Ptpn5 | 0.376017447 | -0.260572229 | 0.398 | 0.44 | 1 |
| Kcnk2 | 0.376298007 | -0.297767817 | 0.46 | 0.477 | 1 |
| Timm8b | 0.376684655 | -0.313672784 | 0.108 | 0.138 | 1 |
| B230219D22Rik | 0.377266372 | 0.259096407 | 0.29 | 0.257 | 1 |
| Appbp2 | 0.377670745 | 0.321296958 | 0.324 | 0.294 | 1 |
| Nxph1 | 0.378380448 | 0.295694546 | 0.114 | 0.083 | 1 |
| Hnrnpul2 | 0.378612748 | -0.272606638 | 0.216 | 0.248 | 1 |
| Rpl26 | 0.378845001 | -0.438970983 | 0.125 | 0.156 | 1 |
| Arhgef3 | 0.381399374 | -0.271048785 | 0.375 | 0.422 | 1 |
| Pdxp | 0.381439723 | -0.302088073 | 0.091 | 0.119 | 1 |
| Rundc3b | 0.381761321 | -0.318323312 | 0.54 | 0.569 | 1 |
| Khnyn | 0.382975036 | -0.333042747 | 0.091 | 0.119 | 1 |
| Ppp2r2b | 0.384639998 | -0.303482779 | 0.523 | 0.523 | 1 |
| Dgkb | 0.386691635 | -0.352066942 | 0.767 | 0.789 | 1 |
| Uchl1 | 0.386888188 | -0.362247415 | 0.318 | 0.339 | 1 |
| Gm1604a | 0.388066843 | -0.367655945 | 0.193 | 0.22 | 1 |
| Chst10 | 0.388663721 | -0.261029593 | 0.142 | 0.174 | 1 |
| Basp1 | 0.388793364 | -0.362628634 | 0.25 | 0.294 | 1 |
| Esco1 | 0.388919839 | -0.366633462 | 0.278 | 0.312 | 1 |
| Galntl6 | 0.38941162 | 0.2950317 | 0.631 | 0.587 | 1 |
| Eng | 0.389867734 | 0.347577932 | 0.358 | 0.321 | 1 |
| Mmd | 0.390229808 | -0.417985615 | 0.25 | 0.284 | 1 |
| Arpc5 | 0.393598915 | -0.374465446 | 0.17 | 0.202 | 1 |
| Clec2d | 0.393889005 | 0.264545558 | 0.25 | 0.211 | 1 |
| Chd3os | 0.396524064 | -0.367829624 | 0.125 | 0.156 | 1 |
| Fam162a | 0.398328569 | 0.420500916 | 0.199 | 0.174 | 1 |
| Cyyr1 | 0.398452771 | 0.369484147 | 0.324 | 0.294 | 1 |
| Unc13b | 0.398655724 | 0.266901557 | 0.318 | 0.275 | 1 |
| Atp6v0e2 | 0.399287451 | -0.260412574 | 0.125 | 0.156 | 1 |
| Tial1 | 0.399407499 | -0.309592421 | 0.438 | 0.468 | 1 |
| Crmp1 | 0.402397823 | -0.288075752 | 0.142 | 0.174 | 1 |
| Ube2i | 0.402645958 | -0.250827289 | 0.233 | 0.266 | 1 |
| Carmil1 | 0.402752191 | -0.386849997 | 0.42 | 0.349 | 1 |
| Mcf2l | 0.403013215 | -0.306933442 | 0.46 | 0.505 | 1 |
| Sf3b5 | 0.403680906 | -0.421074052 | 0.102 | 0.128 | 1 |
| Dclk3 | 0.405399302 | -0.250366053 | 0.182 | 0.211 | 1 |
| Cr1l | 0.408376227 | 0.301136172 | 0.318 | 0.294 | 1 |
| Kcnab1 | 0.410428472 | -0.28749389 | 0.551 | 0.569 | 1 |
| Rtn1 | 0.416207987 | -0.306753896 | 0.767 | 0.752 | 1 |
| Suz12 | 0.416280026 | -0.336362 | 0.341 | 0.367 | 1 |
| Rgs12 | 0.417605536 | -0.311617506 | 0.244 | 0.284 | 1 |
| Lhfpl3 | 0.417835908 | 0.255029889 | 0.46 | 0.413 | 1 |
| Senp7 | 0.418750934 | -0.339568209 | 0.438 | 0.459 | 1 |
| Vps16 | 0.419185392 | -0.258366618 | 0.108 | 0.138 | 1 |
| Tmem164 | 0.420502436 | 0.278331858 | 0.403 | 0.358 | 1 |
| Ntrk2 | 0.421789588 | -0.402424226 | 0.545 | 0.523 | 1 |
| Six3 | 0.423716637 | -0.340199969 | 0.102 | 0.128 | 1 |
| Synj2 | 0.423881645 | -0.459336891 | 0.159 | 0.183 | 1 |
| Rab18 | 0.428075325 | -0.318813344 | 0.227 | 0.257 | 1 |
| Ube2d3 | 0.428172071 | -0.286245764 | 0.506 | 0.514 | 1 |
| Dnajc6 | 0.429048874 | 0.27697598 | 0.375 | 0.358 | 1 |
| Col8a1 | 0.429065731 | 0.391959357 | 0.119 | 0.092 | 1 |
| Sdc2 | 0.429359273 | -0.294473082 | 0.403 | 0.339 | 1 |
| Frrs1l | 0.429948024 | -0.295980663 | 0.278 | 0.303 | 1 |
| Rassf9 | 0.432492631 | 0.338083442 | 0.176 | 0.147 | 1 |
| Tob1 | 0.433951943 | -0.280909287 | 0.119 | 0.147 | 1 |
| Pten | 0.433971344 | 0.272323048 | 0.659 | 0.633 | 1 |
| Sulf1 | 0.435238119 | 0.338125583 | 0.136 | 0.11 | 1 |
| Ctps2 | 0.438310887 | -0.40805157 | 0.131 | 0.156 | 1 |
| Lyst | 0.440770295 | -0.299491821 | 0.449 | 0.468 | 1 |
| Rbfox1 | 0.441531668 | -0.251361738 | 0.841 | 0.862 | 1 |
| Penk | 0.441756722 | -0.437935285 | 0.528 | 0.541 | 1 |
| Opa1 | 0.443082208 | -0.251666647 | 0.324 | 0.358 | 1 |
| Snx10 | 0.445774253 | -0.252391249 | 0.318 | 0.358 | 1 |
| Cfl2 | 0.445774253 | -0.272701159 | 0.318 | 0.358 | 1 |
| Ankmy2 | 0.447044198 | -0.257097252 | 0.188 | 0.147 | 1 |
| Gpc5 | 0.447429693 | -0.318661338 | 0.216 | 0.248 | 1 |
| Pcdh17 | 0.448191345 | -0.288814539 | 0.472 | 0.45 | 1 |
| Dlat | 0.449839791 | -0.307791707 | 0.216 | 0.248 | 1 |
| Mbnl1 | 0.450726985 | -0.268461094 | 0.636 | 0.661 | 1 |
| Atp5d | 0.451928223 | -0.277949799 | 0.199 | 0.229 | 1 |
| Cmpk1 | 0.454852744 | -0.312483154 | 0.222 | 0.248 | 1 |
| Uqcc1 | 0.455487017 | 0.376250903 | 0.182 | 0.165 | 1 |
| Ppard | 0.456492014 | -0.268363246 | 0.295 | 0.321 | 1 |
| Ensa | 0.462392267 | -0.339729498 | 0.29 | 0.312 | 1 |
| Camk4 | 0.4666236 | -0.310613555 | 0.568 | 0.541 | 1 |
| Rasd2 | 0.46703992 | -0.281740161 | 0.199 | 0.229 | 1 |
| 2810474O19Rik | 0.468148344 | -0.272744876 | 0.216 | 0.248 | 1 |
| Flrt1 | 0.468581338 | -0.264732967 | 0.085 | 0.11 | 1 |
| Timm13 | 0.470311613 | -0.369264442 | 0.142 | 0.165 | 1 |
| Ophn1 | 0.47061281 | -0.303737522 | 0.398 | 0.413 | 1 |
| Cend1 | 0.472053312 | -0.263521158 | 0.119 | 0.147 | 1 |
| Ptprs | 0.473191788 | 0.251159078 | 0.381 | 0.349 | 1 |
| Map9 | 0.475485646 | -0.304088228 | 0.136 | 0.165 | 1 |
| Mthfd1l | 0.480579748 | 0.364378876 | 0.239 | 0.211 | 1 |
| Rnf103 | 0.481968637 | -0.256543913 | 0.335 | 0.367 | 1 |
| Cacna1i | 0.482813 | 0.269323389 | 0.159 | 0.138 | 1 |
| Atp6v1a | 0.483452687 | -0.372348703 | 0.386 | 0.404 | 1 |
| Tlk1 | 0.48623097 | -0.325216919 | 0.443 | 0.468 | 1 |
| Eif4a1 | 0.486441276 | -0.319926848 | 0.273 | 0.303 | 1 |
| Atg12 | 0.486447756 | -0.31160821 | 0.193 | 0.22 | 1 |
| Sec24d | 0.488066103 | 0.25651264 | 0.125 | 0.101 | 1 |
| Atraid | 0.49076494 | -0.298689736 | 0.193 | 0.211 | 1 |
| Ndufb3 | 0.492510853 | -0.517421692 | 0.227 | 0.239 | 1 |
| Rps9 | 0.494191116 | -0.258434928 | 0.227 | 0.257 | 1 |
| Strap | 0.494273304 | -0.311245909 | 0.114 | 0.138 | 1 |
| Prelid1 | 0.494803856 | -0.255374585 | 0.08 | 0.101 | 1 |
| Raph1 | 0.495071747 | -0.486630297 | 0.324 | 0.349 | 1 |
| Hsp90aa1 | 0.496109186 | -0.417094583 | 0.193 | 0.211 | 1 |
| Atpif1 | 0.498290441 | -0.256213263 | 0.29 | 0.239 | 1 |
| Polb | 0.498334093 | -0.362593134 | 0.364 | 0.376 | 1 |
| Rap1b | 0.499396125 | 0.273252314 | 0.295 | 0.284 | 1 |
| Fbxl5 | 0.49969643 | -0.25017144 | 0.369 | 0.394 | 1 |
| Abca1 | 0.500410674 | 0.34295075 | 0.256 | 0.239 | 1 |
| Glis3 | 0.500536386 | -0.269890475 | 0.08 | 0.101 | 1 |
| Nup88 | 0.503033656 | -0.265317016 | 0.142 | 0.165 | 1 |
| Epha5 | 0.504650242 | -0.345396053 | 0.386 | 0.404 | 1 |
| Atp5h | 0.506005784 | -0.290734147 | 0.17 | 0.193 | 1 |
| Fxr2 | 0.509309624 | -0.287677987 | 0.227 | 0.257 | 1 |
| Reps1 | 0.512704889 | -0.325409835 | 0.205 | 0.229 | 1 |
| Stk39 | 0.515629977 | -0.42052307 | 0.5 | 0.505 | 1 |
| Psap | 0.51588419 | -0.456675416 | 0.614 | 0.615 | 1 |
| Clstn2 | 0.516008714 | -0.392453771 | 0.182 | 0.211 | 1 |
| Nedd8 | 0.516318931 | -0.26868041 | 0.227 | 0.257 | 1 |
| Mllt3 | 0.516519234 | -0.25903013 | 0.705 | 0.706 | 1 |
| Adgrl1 | 0.517491054 | -0.296175181 | 0.398 | 0.404 | 1 |
| Ndst3 | 0.524142902 | -0.434438277 | 0.205 | 0.165 | 1 |
| 4732471J01Rik | 0.524144949 | -0.325649497 | 0.335 | 0.339 | 1 |
| Nap1l5 | 0.524666793 | -0.348853659 | 0.227 | 0.257 | 1 |
| Cped1 | 0.524979073 | 0.286224368 | 0.256 | 0.22 | 1 |
| Sirt2 | 0.525707384 | -0.257298607 | 0.244 | 0.266 | 1 |
| Larp1b | 0.527623005 | -0.418338245 | 0.119 | 0.138 | 1 |
| Anxa5 | 0.527723402 | -0.271437997 | 0.153 | 0.174 | 1 |
| Slc9a9 | 0.533083238 | 0.304138668 | 0.244 | 0.229 | 1 |
| Rgcc | 0.536137983 | 0.358150649 | 0.159 | 0.138 | 1 |
| C1qtnf7 | 0.536230913 | -0.29987527 | 0.091 | 0.11 | 1 |
| Tmem158 | 0.537629289 | -0.365985441 | 0.29 | 0.321 | 1 |
| Cep120 | 0.539814739 | -0.259991956 | 0.244 | 0.275 | 1 |
| Selenow | 0.550467104 | -0.26576264 | 0.466 | 0.514 | 1 |
| Pdzrn4 | 0.550647364 | -0.352302845 | 0.267 | 0.275 | 1 |
| Cuedc2 | 0.553574355 | -0.469976337 | 0.114 | 0.128 | 1 |
| Slc39a9 | 0.556480347 | -0.290692475 | 0.119 | 0.138 | 1 |
| Oprm1 | 0.556781707 | -0.289667588 | 0.136 | 0.156 | 1 |
| Zfp40 | 0.55754818 | -0.261159141 | 0.233 | 0.257 | 1 |
| Rab14 | 0.557776954 | -0.271278938 | 0.438 | 0.459 | 1 |
| Ppa1 | 0.558149926 | -0.259542523 | 0.091 | 0.11 | 1 |
| Gm39469 | 0.558483139 | 0.262086526 | 0.199 | 0.183 | 1 |
| Arhgef10 | 0.559047127 | 0.287042141 | 0.256 | 0.239 | 1 |
| Kctd16 | 0.559188192 | -0.427483274 | 0.483 | 0.459 | 1 |
| Opcml | 0.559525853 | -0.309931341 | 0.648 | 0.587 | 1 |
| Cops8 | 0.564690944 | -0.268523701 | 0.165 | 0.183 | 1 |
| Scamp2 | 0.568325703 | -0.274915208 | 0.102 | 0.119 | 1 |
| Map4k3 | 0.570553235 | -0.25196634 | 0.455 | 0.468 | 1 |
| Vdac2 | 0.572766374 | -0.346620958 | 0.295 | 0.303 | 1 |
| Fbxl2 | 0.574891865 | -0.2566174 | 0.273 | 0.294 | 1 |
| Sypl | 0.577439446 | -0.255885581 | 0.267 | 0.303 | 1 |
| Cct4 | 0.578124227 | -0.291596232 | 0.136 | 0.156 | 1 |
| Zfp384 | 0.580660329 | -0.413271389 | 0.165 | 0.174 | 1 |
| Tnr | 0.582100752 | 0.265662634 | 0.381 | 0.376 | 1 |
| Hs3st4 | 0.582249649 | -0.285061201 | 0.375 | 0.376 | 1 |
| Klf7 | 0.582387826 | -0.257419143 | 0.557 | 0.55 | 1 |
| Syp | 0.585445789 | -0.279060732 | 0.307 | 0.248 | 1 |
| Gm20663 | 0.586086224 | -0.488151304 | 0.119 | 0.138 | 1 |
| Gpr83 | 0.588359402 | -0.371405698 | 0.159 | 0.174 | 1 |
| Nol4l | 0.591682503 | -0.312982197 | 0.205 | 0.22 | 1 |
| Lmbrd2 | 0.60002204 | -0.389534704 | 0.233 | 0.248 | 1 |
| Syt11 | 0.60582207 | -0.269918992 | 0.585 | 0.578 | 1 |
| Alkbh5 | 0.605959029 | -0.253587035 | 0.182 | 0.202 | 1 |
| Ctsb | 0.611101361 | -0.255500094 | 0.318 | 0.33 | 1 |
| Fer | 0.617333258 | -0.291067342 | 0.432 | 0.45 | 1 |
| Slc35e2 | 0.618788791 | -0.250855591 | 0.131 | 0.147 | 1 |
| Nckap5 | 0.619600304 | -0.407499788 | 0.17 | 0.183 | 1 |
| Zc3hav1 | 0.621374978 | -0.272382795 | 0.102 | 0.119 | 1 |
| Gpr180 | 0.622358066 | -0.388980803 | 0.125 | 0.138 | 1 |
| Mgp | 0.623796843 | 0.499588256 | 0.108 | 0.092 | 1 |
| Tmcc2 | 0.625507375 | -0.256093274 | 0.148 | 0.165 | 1 |
| A330015K06Rik | 0.625663168 | -0.294757984 | 0.369 | 0.358 | 1 |
| Ehd4 | 0.62816522 | 0.283641683 | 0.119 | 0.101 | 1 |
| Cplx2 | 0.629278799 | -0.35735325 | 0.341 | 0.349 | 1 |
| Psma3 | 0.631963833 | -0.2885981 | 0.273 | 0.284 | 1 |
| Zfhx4 | 0.633177806 | 0.269696451 | 0.25 | 0.229 | 1 |
| Acbd5 | 0.63540247 | -0.346722253 | 0.261 | 0.275 | 1 |
| Psd | 0.635526232 | -0.354299245 | 0.182 | 0.193 | 1 |
| Tmem59 | 0.637230098 | -0.25734476 | 0.42 | 0.44 | 1 |
| B3gat1 | 0.640039736 | -0.27895937 | 0.136 | 0.11 | 1 |
| Skil | 0.640906179 | -0.398941775 | 0.25 | 0.248 | 1 |
| Thy1 | 0.64218936 | -0.307145831 | 0.25 | 0.266 | 1 |
| Pdia6 | 0.64307181 | -0.416735414 | 0.159 | 0.174 | 1 |
| Asic1 | 0.646714904 | -0.260415823 | 0.102 | 0.119 | 1 |
| Fbxw11 | 0.650867696 | -0.288385396 | 0.415 | 0.413 | 1 |
| Aifm1 | 0.652805348 | 0.263666769 | 0.205 | 0.193 | 1 |
| B4gat1 | 0.65326179 | -0.306250975 | 0.108 | 0.119 | 1 |
| Pgm5 | 0.66121565 | -0.250520819 | 0.159 | 0.174 | 1 |
| Fkbp5 | 0.663526725 | -0.310879953 | 0.193 | 0.211 | 1 |
| Ppm1g | 0.666664537 | -0.302479647 | 0.131 | 0.147 | 1 |
| Pknox2 | 0.667486457 | -0.315256419 | 0.256 | 0.275 | 1 |
| Tmed5 | 0.668319561 | -0.2965155 | 0.244 | 0.257 | 1 |
| Fam149b | 0.669639046 | -0.300078148 | 0.222 | 0.239 | 1 |
| U2surp | 0.670433444 | -0.284536063 | 0.403 | 0.413 | 1 |
| 9530068E07Rik | 0.678317958 | -0.277049759 | 0.153 | 0.165 | 1 |
| Gm19710 | 0.685717253 | -0.284647466 | 0.216 | 0.22 | 1 |
| Ptpn14 | 0.689919262 | -0.266407134 | 0.21 | 0.22 | 1 |
| Diaph1 | 0.693382424 | -0.333955083 | 0.25 | 0.266 | 1 |
| Tmem243 | 0.697120623 | -0.262113584 | 0.33 | 0.349 | 1 |
| Nacc1 | 0.701039952 | -0.33204354 | 0.119 | 0.128 | 1 |
| Ly6a | 0.703976925 | 0.362181699 | 0.267 | 0.257 | 1 |
| Tox | 0.704695143 | -0.309637019 | 0.102 | 0.11 | 1 |
| Sv2a | 0.704728096 | -0.28369467 | 0.341 | 0.303 | 1 |
| Tmem106b | 0.70915253 | -0.368188434 | 0.233 | 0.248 | 1 |
| Fli1 | 0.710668261 | -0.480338158 | 0.33 | 0.321 | 1 |
| Cox14 | 0.712712017 | -0.251674269 | 0.091 | 0.101 | 1 |
| Bex3 | 0.726965331 | -0.562733364 | 0.176 | 0.174 | 1 |
| Slc7a14 | 0.72959307 | -0.392339175 | 0.278 | 0.294 | 1 |
| Angel2 | 0.733373918 | -0.261475283 | 0.301 | 0.321 | 1 |
| Rpl17 | 0.734991771 | -0.291955475 | 0.188 | 0.193 | 1 |
| Reep5 | 0.736175862 | -0.289651934 | 0.244 | 0.257 | 1 |
| Gm15261 | 0.743552298 | -0.302100963 | 0.227 | 0.239 | 1 |
| Hnrnph1 | 0.745125599 | -0.365708064 | 0.494 | 0.477 | 1 |
| Rpl22 | 0.747604156 | -0.300504007 | 0.148 | 0.156 | 1 |
| Uimc1 | 0.753260723 | 0.276565832 | 0.205 | 0.202 | 1 |
| Ttc33 | 0.757557324 | -0.294886423 | 0.119 | 0.128 | 1 |
| Tpt1 | 0.76139672 | -0.25346302 | 0.222 | 0.229 | 1 |
| Prex1 | 0.762091855 | -0.262051771 | 0.199 | 0.202 | 1 |
| Adap2 | 0.762301109 | -0.410808704 | 0.256 | 0.229 | 1 |
| Ints14 | 0.765304065 | 0.252197712 | 0.119 | 0.138 | 1 |
| Pgrmc1 | 0.765356164 | -0.318691536 | 0.273 | 0.275 | 1 |
| Atp1a1 | 0.766671233 | -0.272494145 | 0.392 | 0.349 | 1 |
| Serinc5 | 0.766808612 | -0.310011976 | 0.324 | 0.321 | 1 |
| Gas6 | 0.767814345 | -0.336198322 | 0.188 | 0.193 | 1 |
| Stmn3 | 0.767899777 | -0.441292064 | 0.347 | 0.33 | 1 |
| Dzank1 | 0.769985349 | -0.263490589 | 0.318 | 0.312 | 1 |
| Itpa | 0.771675393 | -0.269982141 | 0.136 | 0.147 | 1 |
| Egfem1 | 0.771865341 | -0.254204209 | 0.449 | 0.413 | 1 |
| Trpm3 | 0.776338319 | -0.563204724 | 0.409 | 0.394 | 1 |
| Samhd1 | 0.777810301 | -0.341551522 | 0.182 | 0.183 | 1 |
| Cenpc1 | 0.780793592 | 0.314235904 | 0.29 | 0.294 | 1 |
| Rragd | 0.780841288 | -0.264964587 | 0.159 | 0.165 | 1 |
| Mff | 0.781579207 | -0.280352045 | 0.324 | 0.294 | 1 |
| Ywhag | 0.78277815 | -0.293554607 | 0.381 | 0.385 | 1 |
| Cyp46a1 | 0.786591288 | -0.255228256 | 0.148 | 0.156 | 1 |
| Scn4b | 0.788820681 | -0.41650366 | 0.42 | 0.394 | 1 |
| Brd4 | 0.788870389 | -0.250348212 | 0.585 | 0.56 | 1 |
| Gm46218 | 0.793264397 | -0.268169575 | 0.17 | 0.174 | 1 |
| Eif5a | 0.796655772 | -0.284550689 | 0.148 | 0.156 | 1 |
| Dmtf1 | 0.797337706 | -0.308111426 | 0.352 | 0.349 | 1 |
| Adora2a | 0.800506442 | -0.267082174 | 0.244 | 0.22 | 1 |
| Pcp4l1 | 0.800879669 | -0.321616856 | 0.398 | 0.367 | 1 |
| Tmem248 | 0.801030356 | -0.260699783 | 0.142 | 0.147 | 1 |
| Zhx3 | 0.801417838 | -0.255789593 | 0.42 | 0.404 | 1 |
| Cdh9 | 0.810266815 | -0.292763099 | 0.273 | 0.275 | 1 |
| Erp29 | 0.812783331 | -0.258767618 | 0.188 | 0.193 | 1 |
| Atl1 | 0.814267085 | -0.354222843 | 0.312 | 0.303 | 1 |
| Ppp1r1b | 0.815955407 | -0.354401067 | 0.375 | 0.367 | 1 |
| Atp1a3 | 0.835277749 | -0.338789715 | 0.472 | 0.459 | 1 |
| Nom1 | 0.8442161 | -0.262571362 | 0.131 | 0.138 | 1 |
| Cpne3 | 0.845367046 | -0.2748519 | 0.193 | 0.174 | 1 |
| Pgk1 | 0.860632268 | -0.32799413 | 0.205 | 0.202 | 1 |
| Cast | 0.869317776 | -0.294541414 | 0.182 | 0.193 | 1 |
| Dhx30 | 0.876677168 | -0.267297385 | 0.369 | 0.358 | 1 |
| Lnpep | 0.877140217 | 0.259689622 | 0.398 | 0.422 | 1 |
| Pdzrn3 | 0.88237275 | 0.317609676 | 0.153 | 0.165 | 1 |
| Prrt1 | 0.883444428 | -0.252054025 | 0.148 | 0.138 | 1 |
| Nxpe2 | 0.891888057 | -0.318537718 | 0.21 | 0.211 | 1 |
| Serbp1 | 0.899510981 | -0.291586232 | 0.364 | 0.339 | 1 |
| Lin7a | 0.900055138 | -0.404220303 | 0.466 | 0.422 | 1 |
| Fgf13 | 0.900783967 | -0.282688111 | 0.318 | 0.312 | 1 |
| Tmem91 | 0.901095329 | -0.291362219 | 0.125 | 0.128 | 1 |
| Gng11 | 0.903396697 | -0.359208639 | 0.244 | 0.22 | 1 |
| Gm14005 | 0.906467778 | -0.354560381 | 0.205 | 0.193 | 1 |
| Sort1 | 0.90734023 | -0.31849035 | 0.432 | 0.394 | 1 |
| Ppp3cb | 0.907756787 | -0.254228681 | 0.455 | 0.44 | 1 |
| Uqcrq | 0.915303064 | -0.253173022 | 0.131 | 0.128 | 1 |
| Chmp7 | 0.917345237 | -0.267438811 | 0.125 | 0.128 | 1 |
| Kcnj4 | 0.917582133 | -0.386171758 | 0.176 | 0.165 | 1 |
| Nxn | 0.924242358 | -0.495088397 | 0.284 | 0.257 | 1 |
| Paip1 | 0.927389266 | -0.309384116 | 0.188 | 0.174 | 1 |
| Nit1 | 0.927519432 | -0.370043484 | 0.131 | 0.119 | 1 |
| Rnf187 | 0.932229809 | -0.310553747 | 0.233 | 0.229 | 1 |
| Prkab2 | 0.938471614 | -0.25508382 | 0.119 | 0.11 | 1 |
| Cds2 | 0.939760654 | -0.252313307 | 0.307 | 0.294 | 1 |
| Xbp1 | 0.940517186 | -0.276943728 | 0.193 | 0.183 | 1 |
| Mphosph8 | 0.940709379 | -0.250875628 | 0.278 | 0.266 | 1 |
| Slc32a1 | 0.941718543 | -0.254467464 | 0.278 | 0.275 | 1 |
| Smc5 | 0.945455113 | -0.324858743 | 0.324 | 0.294 | 1 |
| Nap1l1 | 0.947205984 | -0.267997063 | 0.256 | 0.239 | 1 |
| Zfp521 | 0.947433075 | -0.28401135 | 0.25 | 0.229 | 1 |
| Aebp2 | 0.947991339 | -0.301645989 | 0.341 | 0.321 | 1 |
| Gm48383 | 0.959488165 | -0.278940026 | 0.165 | 0.156 | 1 |
| Park7 | 0.966840492 | -0.387462769 | 0.205 | 0.183 | 1 |
| Ddx46 | 0.969762502 | -0.265713357 | 0.222 | 0.211 | 1 |
| Nedd9 | 0.973822971 | -0.295413899 | 0.205 | 0.193 | 1 |
| Nrgn | 0.975941586 | -0.460820277 | 0.455 | 0.413 | 1 |
| Hp1bp3 | 0.977569173 | -0.281331273 | 0.312 | 0.294 | 1 |
| Sh3bgrl | 0.977569177 | -0.307464954 | 0.307 | 0.303 | 1 |
| Kcnab2 | 0.977778518 | -0.292118958 | 0.131 | 0.128 | 1 |
| Clu | 0.980260765 | -0.3239335 | 0.222 | 0.202 | 1 |
| Cyth1 | 0.980484314 | -0.273811475 | 0.398 | 0.367 | 1 |
| Ift74 | 0.991306659 | -0.260610741 | 0.188 | 0.183 | 1 |

| **Supplemental Table S4. Differentially expressed genes in each cell type generated comparing the control and the mTBI SVZ, related to Figure 2. (Astrocyte & NSC DEGs)** | | | | | |
| --- | --- | --- | --- | --- | --- |
| Column1 | p_val | avg_log2FC | pct.1 | pct.2 | p_val_adj |
| Gm42418 | 6.0093E-104 | 0.644809928 | 1 | 0.999 | 1.36489E-99 |
| Plp1 | 1.76938E-38 | 0.627884881 | 0.896 | 0.73 | 4.0188E-34 |
| Malat1 | 4.0992E-36 | 0.304397942 | 1 | 1 | 9.3105E-32 |
| Cmss1 | 5.35805E-20 | 0.392886421 | 0.911 | 0.836 | 1.21697E-15 |
| Wdr17 | 5.67174E-17 | -0.657139806 | 0.698 | 0.728 | 1.28822E-12 |
| Tac1 | 2.91199E-16 | -0.508722336 | 0.243 | 0.397 | 6.614E-12 |
| Fgfr2 | 5.05871E-16 | -0.403721654 | 0.803 | 0.847 | 1.14899E-11 |
| Gm3764 | 1.46723E-14 | 0.348491747 | 0.897 | 0.82 | 3.33252E-10 |
| Calm2 | 6.725E-13 | -0.348680762 | 0.636 | 0.753 | 1.52745E-08 |
| Nebl | 1.72961E-11 | 0.505171014 | 0.555 | 0.434 | 3.92846E-07 |
| A830082K12Rik | 2.77875E-11 | 0.412395854 | 0.228 | 0.122 | 6.31137E-07 |
| Calm1 | 3.45161E-11 | -0.389473517 | 0.45 | 0.579 | 7.83965E-07 |
| Arpp21 | 4.98813E-11 | -0.408420132 | 0.464 | 0.575 | 1.13295E-06 |
| AC149090.1 | 1.20383E-10 | 0.419355544 | 0.229 | 0.128 | 2.73425E-06 |
| Gpm6a | 2.79756E-10 | -0.259955892 | 0.855 | 0.892 | 6.3541E-06 |
| Aldh1a1 | 4.0009E-10 | 0.571134863 | 0.139 | 0.061 | 9.08725E-06 |
| Ppp1r2 | 7.22674E-10 | -0.384514863 | 0.277 | 0.395 | 1.64141E-05 |
| Ubb | 9.3377E-10 | -0.351622243 | 0.546 | 0.646 | 2.12087E-05 |
| Lrp1b | 1.15472E-09 | 0.409807895 | 0.808 | 0.72 | 2.62273E-05 |
| Camk1d | 1.21394E-09 | 0.330074473 | 0.713 | 0.602 | 2.75723E-05 |
| 9530026P05Rik | 1.89717E-09 | 0.50866609 | 0.266 | 0.162 | 4.30904E-05 |
| Gria2 | 2.87597E-09 | -0.272224932 | 0.865 | 0.899 | 6.5322E-05 |
| Gm45846 | 4.01707E-09 | 0.398487406 | 0.238 | 0.142 | 9.12398E-05 |
| Npas3 | 5.42628E-09 | 0.337861044 | 0.814 | 0.757 | 0.000123247 |
| Mir670hg | 1.1494E-08 | 0.45446057 | 0.217 | 0.129 | 0.000261064 |
| Pbxip1 | 3.07118E-08 | 0.35646052 | 0.216 | 0.129 | 0.000697556 |
| Sorbs1 | 3.22392E-08 | 0.316192401 | 0.745 | 0.665 | 0.00073225 |
| Srgap1 | 3.35972E-08 | 0.451635153 | 0.318 | 0.223 | 0.000763093 |
| Gpr88 | 5.60539E-08 | -0.356201247 | 0.458 | 0.554 | 0.001273153 |
| Rgs6 | 5.70793E-08 | 0.417572263 | 0.592 | 0.505 | 0.001296443 |
| Agbl4 | 6.23934E-08 | 0.445020055 | 0.415 | 0.312 | 0.00141714 |
| Cdh2 | 6.24056E-08 | -0.253150374 | 0.717 | 0.788 | 0.001417418 |
| Synpr | 6.89605E-08 | -0.440908849 | 0.214 | 0.312 | 0.001566299 |
| Gm48512 | 6.90098E-08 | -0.362261576 | 0.109 | 0.188 | 0.00156742 |
| Htra1 | 1.02823E-07 | -0.425317725 | 0.35 | 0.446 | 0.002335417 |
| Spock3 | 1.12073E-07 | -0.280863288 | 0.531 | 0.622 | 0.002545517 |
| Nsg2 | 1.30397E-07 | -0.343408842 | 0.485 | 0.568 | 0.002961715 |
| Gm26804 | 1.43712E-07 | -0.260567393 | 0.513 | 0.61 | 0.003264131 |
| Fam171b | 1.47268E-07 | -0.352928151 | 0.445 | 0.542 | 0.003344904 |
| Tmcc3 | 1.69995E-07 | 0.42882642 | 0.476 | 0.384 | 0.003861088 |
| Mgll | 2.16674E-07 | -0.492884576 | 0.316 | 0.408 | 0.004921306 |
| Itm2c | 2.44491E-07 | -0.264118214 | 0.45 | 0.56 | 0.005553127 |
| Snap25 | 2.71617E-07 | -0.307308656 | 0.597 | 0.674 | 0.006169247 |
| Lars2 | 3.47497E-07 | 0.311608515 | 0.419 | 0.321 | 0.0078927 |
| Efnb2 | 3.90657E-07 | -0.282420338 | 0.183 | 0.275 | 0.008872996 |
| Fus | 5.18833E-07 | -0.277562976 | 0.485 | 0.576 | 0.011784251 |
| Pitpnc1 | 5.58635E-07 | 0.353721874 | 0.848 | 0.804 | 0.012688277 |
| Glt8d1 | 6.14137E-07 | 0.334328993 | 0.226 | 0.147 | 0.013948892 |
| Shisa4 | 6.41541E-07 | 0.293243679 | 0.245 | 0.161 | 0.014571312 |
| Zfp804b | 8.33403E-07 | 0.250181317 | 0.113 | 0.054 | 0.018929077 |
| Fry | 8.87584E-07 | 0.542155761 | 0.481 | 0.4 | 0.020159686 |
| Fkbp1a | 9.44076E-07 | -0.325203699 | 0.226 | 0.314 | 0.021442809 |
| Ndrg2 | 9.83293E-07 | 0.379956699 | 0.447 | 0.364 | 0.02233354 |
| Gm42439 | 9.85551E-07 | -0.360546051 | 0.249 | 0.336 | 0.022384823 |
| Gm12239 | 9.88441E-07 | 0.382863163 | 0.551 | 0.477 | 0.022450453 |
| Enah | 1.02183E-06 | -0.253834588 | 0.693 | 0.761 | 0.023208725 |
| Ccdc141 | 1.07794E-06 | 0.312269123 | 0.35 | 0.257 | 0.024483246 |
| Itpkb | 1.12602E-06 | 0.383796305 | 0.184 | 0.113 | 0.025575323 |
| Dst | 1.15885E-06 | 0.318131381 | 0.589 | 0.516 | 0.02632097 |
| Scd2 | 1.21992E-06 | 0.326013675 | 0.548 | 0.459 | 0.027708075 |
| Hspa8 | 1.29454E-06 | -0.284066344 | 0.363 | 0.46 | 0.029402807 |
| Atp1b2 | 1.37776E-06 | 0.32001919 | 0.276 | 0.192 | 0.031293061 |
| Kcnq5 | 1.71515E-06 | -0.414282111 | 0.613 | 0.675 | 0.038956265 |
| Arf3 | 1.76183E-06 | -0.319878289 | 0.289 | 0.381 | 0.040016508 |
| Nsg1 | 2.08534E-06 | -0.311996251 | 0.24 | 0.325 | 0.047364348 |
| Pbx3 | 2.17364E-06 | -0.523683008 | 0.497 | 0.576 | 0.049369774 |
| Nrbp2 | 2.47381E-06 | 0.323157152 | 0.262 | 0.182 | 0.05618771 |
| Syne1 | 2.93781E-06 | 0.264239618 | 0.69 | 0.62 | 0.066726399 |
| Car10 | 3.33009E-06 | 0.295024379 | 0.113 | 0.059 | 0.075636247 |
| Aldh1l1 | 3.54644E-06 | 0.341359397 | 0.252 | 0.175 | 0.080550385 |
| Erc1 | 4.24051E-06 | -0.318813426 | 0.392 | 0.466 | 0.096314707 |
| Cldn11 | 4.28658E-06 | 0.259802471 | 0.222 | 0.146 | 0.097361194 |
| Wdr89 | 4.88593E-06 | -0.302781381 | 0.17 | 0.246 | 0.110974207 |
| Hdac8 | 4.90643E-06 | 0.261228823 | 0.785 | 0.722 | 0.111439842 |
| Gnai1 | 6.29645E-06 | -0.303728441 | 0.106 | 0.171 | 0.143011168 |
| Robo2 | 6.77931E-06 | -0.512771301 | 0.555 | 0.621 | 0.153978512 |
| Fgfr3 | 7.14105E-06 | 0.287909635 | 0.404 | 0.325 | 0.162194635 |
| Penk | 8.48983E-06 | -0.304653793 | 0.432 | 0.511 | 0.192829561 |
| C79798 | 9.54982E-06 | -0.337775542 | 0.095 | 0.156 | 0.216905173 |
| mt-Co3 | 1.07436E-05 | -0.298305298 | 0.698 | 0.773 | 0.244018541 |
| Cpq | 1.14156E-05 | 0.331201645 | 0.348 | 0.269 | 0.259282614 |
| Gm16599 | 1.1971E-05 | -0.260902818 | 0.216 | 0.294 | 0.271896976 |
| Gm14964 | 1.19801E-05 | 0.347170566 | 0.325 | 0.252 | 0.272104599 |
| Tmsb4x | 1.35399E-05 | -0.261013973 | 0.545 | 0.613 | 0.307532143 |
| Homer1 | 1.3634E-05 | -0.278586019 | 0.292 | 0.368 | 0.309669446 |
| A830019P07Rik | 1.55348E-05 | 0.281808644 | 0.14 | 0.083 | 0.352842961 |
| Tprkb | 1.59778E-05 | 0.403627098 | 0.378 | 0.303 | 0.362903046 |
| Fam19a5 | 1.64435E-05 | 0.252884271 | 0.342 | 0.264 | 0.373482144 |
| Rasd2 | 2.27506E-05 | -0.252623299 | 0.113 | 0.174 | 0.516734328 |
| Gm33680 | 2.37833E-05 | 0.270125328 | 0.1 | 0.053 | 0.540189691 |
| Kcnq3 | 2.47285E-05 | 0.348924144 | 0.497 | 0.422 | 0.561657755 |
| Gm26936 | 2.52077E-05 | -0.264772529 | 0.176 | 0.249 | 0.572541603 |
| Gm26848 | 2.88896E-05 | -0.27208185 | 0.362 | 0.432 | 0.656170098 |
| Ppp3cc | 2.89447E-05 | 0.265990641 | 0.182 | 0.12 | 0.657421905 |
| Dynll1 | 3.10017E-05 | -0.292651116 | 0.224 | 0.294 | 0.704141938 |
| Anks1 | 3.14415E-05 | 0.30015667 | 0.288 | 0.219 | 0.714130979 |
| Calb1 | 3.17312E-05 | -0.290847635 | 0.141 | 0.205 | 0.720709646 |
| Rhoq | 3.28276E-05 | 0.275783185 | 0.283 | 0.209 | 0.74561246 |
| Tesk2 | 3.32724E-05 | 0.269892405 | 0.151 | 0.094 | 0.755716323 |
| Csrp1 | 3.38949E-05 | 0.290947008 | 0.307 | 0.234 | 0.769854009 |
| Appl2 | 3.39405E-05 | 0.286560382 | 0.453 | 0.381 | 0.77089146 |
| Sash1 | 3.70693E-05 | 0.273754888 | 0.534 | 0.455 | 0.841954959 |
| 5031439G07Rik | 3.86669E-05 | 0.327570183 | 0.295 | 0.224 | 0.878241534 |
| Gm44686 | 4.00586E-05 | -0.25804139 | 0.176 | 0.244 | 0.909851064 |
| Mertk | 4.27971E-05 | -0.352494633 | 0.573 | 0.615 | 0.972050414 |
| Dlg2 | 4.37104E-05 | -0.310509245 | 0.829 | 0.856 | 0.992794095 |
| Tle4 | 4.52911E-05 | -0.277160758 | 0.413 | 0.491 | 1 |
| Hsph1 | 4.53315E-05 | -0.26643721 | 0.128 | 0.189 | 1 |
| Ddo | 4.96243E-05 | 0.347696122 | 0.329 | 0.259 | 1 |
| Pura | 4.97649E-05 | 0.271722828 | 0.339 | 0.26 | 1 |
| Lgi4 | 5.2833E-05 | 0.265123342 | 0.208 | 0.143 | 1 |
| Cdh20 | 5.43365E-05 | 0.291949303 | 0.498 | 0.424 | 1 |
| Slc6a11 | 5.98107E-05 | 0.426793286 | 0.384 | 0.321 | 1 |
| Efna5 | 6.47983E-05 | -0.379871344 | 0.263 | 0.334 | 1 |
| Gm9843 | 6.98039E-05 | -0.29938897 | 0.191 | 0.256 | 1 |
| Macrod2 | 7.03208E-05 | -0.265084973 | 0.796 | 0.829 | 1 |
| Camk2b | 7.28012E-05 | -0.25249946 | 0.287 | 0.363 | 1 |
| Dnah7b | 7.28736E-05 | 0.251553542 | 0.207 | 0.144 | 1 |
| Celf4 | 8.9763E-05 | -0.33051379 | 0.38 | 0.446 | 1 |
| Grip1 | 0.000106775 | -0.295318765 | 0.516 | 0.568 | 1 |
| Ntng2 | 0.000114676 | 0.26016325 | 0.14 | 0.09 | 1 |
| Actb | 0.000118613 | -0.25222466 | 0.555 | 0.617 | 1 |
| Mbp | 0.000130165 | 0.320853416 | 0.292 | 0.226 | 1 |
| Acss2 | 0.000133168 | 0.262211877 | 0.2 | 0.143 | 1 |
| Gm26836 | 0.000136213 | -0.278332828 | 0.178 | 0.24 | 1 |
| Trpm3 | 0.000138299 | 0.436517917 | 0.722 | 0.693 | 1 |
| Lrig1 | 0.000140383 | 0.41897995 | 0.25 | 0.192 | 1 |
| Camk4 | 0.000171508 | -0.270558964 | 0.334 | 0.393 | 1 |
| Samd4 | 0.000176209 | 0.286176096 | 0.285 | 0.221 | 1 |
| Ccdc148 | 0.000177398 | 0.263426782 | 0.206 | 0.15 | 1 |
| Ablim1 | 0.000198691 | 0.321863975 | 0.32 | 0.258 | 1 |
| Grm5 | 0.000202674 | -0.272867302 | 0.692 | 0.736 | 1 |
| Gda | 0.000213096 | -0.279479749 | 0.128 | 0.181 | 1 |
| Sorbs2os | 0.000213291 | -0.281598997 | 0.11 | 0.161 | 1 |
| Sgcd | 0.000220746 | -0.607274527 | 0.318 | 0.379 | 1 |
| Bcar3 | 0.000225966 | 0.252903405 | 0.315 | 0.249 | 1 |
| Tmc7 | 0.000241542 | 0.290572088 | 0.234 | 0.177 | 1 |
| Mphosph9 | 0.000272708 | 0.271456953 | 0.233 | 0.175 | 1 |
| Ksr2 | 0.00030354 | -0.292303283 | 0.35 | 0.406 | 1 |
| Nnat | 0.000313104 | 0.4297334 | 0.497 | 0.462 | 1 |
| Atp13a4 | 0.000321398 | 0.292093784 | 0.241 | 0.182 | 1 |
| Plppr4 | 0.000361043 | -0.260936696 | 0.35 | 0.409 | 1 |
| Pcx | 0.00036966 | 0.308052543 | 0.254 | 0.195 | 1 |
| Ldb2 | 0.000387573 | 0.273532413 | 0.282 | 0.22 | 1 |
| Cpne4 | 0.000394411 | -0.414486403 | 0.061 | 0.101 | 1 |
| Slc8a1 | 0.000406841 | -0.27185441 | 0.266 | 0.335 | 1 |
| Gm2163 | 0.000427087 | -0.273483931 | 0.347 | 0.411 | 1 |
| Rab14 | 0.000429534 | -0.25766077 | 0.312 | 0.366 | 1 |
| Bex2 | 0.000485422 | -0.279809466 | 0.267 | 0.327 | 1 |
| Sema6d | 0.000506919 | 0.261588905 | 0.586 | 0.534 | 1 |
| Syt1 | 0.000519604 | -0.314515031 | 0.657 | 0.684 | 1 |
| Bcl11a | 0.000525324 | -0.263493629 | 0.308 | 0.381 | 1 |
| Ntsr2 | 0.000538498 | 0.270126152 | 0.334 | 0.276 | 1 |
| Foxp2 | 0.000843777 | -0.290781877 | 0.366 | 0.434 | 1 |
| Cep85l | 0.000890585 | 0.275774871 | 0.48 | 0.432 | 1 |
| Gm35188 | 0.001144406 | -0.263530546 | 0.475 | 0.523 | 1 |
| Gm48747 | 0.001159078 | -0.307926662 | 0.347 | 0.399 | 1 |
| Lgi1 | 0.001207873 | 0.307506483 | 0.284 | 0.231 | 1 |
| Cep112 | 0.001286558 | 0.269920443 | 0.269 | 0.214 | 1 |
| Raver2 | 0.001408145 | -0.277385726 | 0.31 | 0.367 | 1 |
| Kcnip3 | 0.001529043 | 0.251939972 | 0.342 | 0.288 | 1 |
| Luzp2 | 0.001768644 | -0.337427992 | 0.708 | 0.741 | 1 |
| Hcn1 | 0.001844749 | -0.361962953 | 0.143 | 0.188 | 1 |
| Slc4a4 | 0.001865121 | 0.290930831 | 0.78 | 0.767 | 1 |
| Mpped2 | 0.00194075 | -0.305194193 | 0.476 | 0.531 | 1 |
| Msra | 0.001965553 | -0.303238546 | 0.261 | 0.314 | 1 |
| C130073E24Rik | 0.002380723 | -0.676149197 | 0.106 | 0.145 | 1 |
| Sparcl1 | 0.002580067 | 0.264522424 | 0.605 | 0.559 | 1 |
| Ppfia2 | 0.003424963 | -0.300861004 | 0.34 | 0.386 | 1 |
| Dcc | 0.00361719 | -0.350918551 | 0.639 | 0.658 | 1 |
| Vcan | 0.004420878 | -0.314668043 | 0.214 | 0.263 | 1 |
| Epha5 | 0.006468317 | -0.275176485 | 0.329 | 0.379 | 1 |
| Oxr1 | 0.007647412 | -0.265405377 | 0.416 | 0.46 | 1 |
| Ptch1 | 0.008211033 | 0.34968466 | 0.481 | 0.449 | 1 |
| Tshz1 | 0.009785789 | -0.278952033 | 0.24 | 0.281 | 1 |
| Cacna1e | 0.011588293 | -0.267363827 | 0.235 | 0.274 | 1 |
| Csrnp3 | 0.014860914 | -0.265329609 | 0.252 | 0.29 | 1 |
| Dlgap2 | 0.015780357 | -0.264651487 | 0.226 | 0.263 | 1 |
| Erbb4 | 0.019372396 | -0.294985718 | 0.764 | 0.701 | 1 |
| Lrrc7 | 0.019732837 | -0.320760995 | 0.611 | 0.624 | 1 |
| Egfr | 0.028302979 | 0.330218054 | 0.426 | 0.391 | 1 |
| Ccser1 | 0.029735804 | -0.264243579 | 0.546 | 0.581 | 1 |
| Gm20754 | 0.031217187 | -0.389059645 | 0.162 | 0.196 | 1 |
| Kcnip1 | 0.044364479 | -0.258512243 | 0.097 | 0.122 | 1 |
| Adarb2 | 0.061716581 | -0.351684786 | 0.317 | 0.345 | 1 |
| Nrxn3 | 0.095906516 | -0.253774852 | 0.93 | 0.924 | 1 |
| Kcnb2 | 0.104263751 | -0.452858441 | 0.222 | 0.243 | 1 |
| Epha6 | 0.11250849 | -0.43394716 | 0.347 | 0.362 | 1 |
| Dscam | 0.125482811 | -0.319037177 | 0.147 | 0.165 | 1 |
| Kctd16 | 0.140921889 | -0.273567195 | 0.269 | 0.288 | 1 |
| Grm8 | 0.191518172 | -0.360550989 | 0.128 | 0.145 | 1 |
| Runx1t1 | 0.239266425 | -0.259856383 | 0.367 | 0.379 | 1 |
| Grm7 | 0.361775156 | -0.280385103 | 0.515 | 0.511 | 1 |
| Dpp10 | 0.375435282 | -0.297373084 | 0.282 | 0.289 | 1 |
| Il1rapl1 | 0.502070672 | -0.262786638 | 0.884 | 0.853 | 1 |
| Gria1 | 0.645557228 | 0.309773889 | 0.421 | 0.428 | 1 |
| Fam155a | 0.651612486 | -0.260623464 | 0.397 | 0.384 | 1 |
| Plxna4 | 0.681146661 | 0.282424032 | 0.335 | 0.331 | 1 |
| Pcdh15 | 0.907821668 | -0.442643963 | 0.26 | 0.25 | 1 |
