# Supplementary material for: Single-nucleus transcriptomic mapping uncovers targets for traumatic brain injury
Source: HighWire-hosted journal article supplement (doi:10.1101/gr.277881.123), 2023-09-20
Supplement: Supplemental_Table_S5.docx [file Supplemental_Table_S5.docx]

| **Supplemental Table S5. Differentially expressed genes generated comparing NSC & astrocyte sub-types of SVZ, related to Figure 4.** | | | | | | | |
| --- | --- | --- | --- | --- | --- | --- | --- |
|  | gene | p_val | avg_log2FC | pct.1 | pct.2 | p_val_adj | cluster |
| Slc1a2 | Slc1a2 | 1.85E-237 | 1.779855506 | 1 | 0.734 | 4.21E-233 | Astrocytes |
| Grm3 | Grm3 | 4.60E-237 | 2.112568925 | 0.986 | 0.512 | 1.05E-232 | Astrocytes |
| Lsamp | Lsamp | 4.38E-217 | 1.439084798 | 1 | 0.964 | 9.95E-213 | Astrocytes |
| Ntm | Ntm | 2.35E-206 | 1.61321572 | 0.999 | 0.739 | 5.35E-202 | Astrocytes |
| Mertk | Mertk | 2.64E-201 | 1.983947063 | 0.926 | 0.359 | 5.99E-197 | Astrocytes |
| Gpc5 | Gpc5 | 2.04E-193 | 1.798083076 | 0.994 | 0.514 | 4.63E-189 | Astrocytes |
| Prex2 | Prex2 | 6.58E-161 | 1.447227641 | 0.977 | 0.496 | 1.49E-156 | Astrocytes |
| Pcdh7 | Pcdh7 | 8.93E-154 | 1.490872505 | 0.947 | 0.519 | 2.03E-149 | Astrocytes |
| Frmd4a | Frmd4a | 9.78E-153 | 1.269254103 | 0.995 | 0.77 | 2.22E-148 | Astrocytes |
| Ptprt | Ptprt | 1.76E-152 | 1.306583432 | 0.987 | 0.601 | 3.99E-148 | Astrocytes |
| Cadm1 | Cadm1 | 5.99E-152 | 1.279787046 | 0.983 | 0.732 | 1.36E-147 | Astrocytes |
| Gabrb1 | Gabrb1 | 4.41E-149 | 1.256547497 | 0.996 | 0.683 | 1.00E-144 | Astrocytes |
| Tspan7 | Tspan7 | 1.25E-142 | 1.395805591 | 0.947 | 0.712 | 2.83E-138 | Astrocytes |
| Wdr17 | Wdr17 | 3.62E-140 | 1.387931608 | 0.955 | 0.533 | 8.21E-136 | Astrocytes |
| Rgs7 | Rgs7 | 6.72E-135 | 1.677483489 | 0.839 | 0.373 | 1.53E-130 | Astrocytes |
| Atp1a2 | Atp1a2 | 3.27E-129 | 1.262076677 | 0.938 | 0.479 | 7.42E-125 | Astrocytes |
| Clmn | Clmn | 7.43E-126 | 1.588459919 | 0.645 | 0.147 | 1.69E-121 | Astrocytes |
| Htra1 | Htra1 | 6.27E-121 | 1.528042293 | 0.683 | 0.193 | 1.42E-116 | Astrocytes |
| Rora | Rora | 3.33E-115 | 0.979270484 | 0.999 | 0.803 | 7.56E-111 | Astrocytes |
| 4930488L21Rik | 4930488L21Rik | 4.17E-115 | 1.680907847 | 0.621 | 0.161 | 9.48E-111 | Astrocytes |
| Grid2 | Grid2 | 6.39E-115 | 1.055721691 | 0.986 | 0.783 | 1.45E-110 | Astrocytes |
| Daam2 | Daam2 | 5.22E-114 | 1.465474311 | 0.637 | 0.165 | 1.19E-109 | Astrocytes |
| Grin2c | Grin2c | 4.91E-113 | 1.485488682 | 0.513 | 0.082 | 1.12E-108 | Astrocytes |
| Nrxn1 | Nrxn1 | 3.70E-112 | 0.756913217 | 1 | 0.981 | 8.39E-108 | Astrocytes |
| Rorb | Rorb | 5.47E-111 | 1.193941436 | 0.952 | 0.573 | 1.24E-106 | Astrocytes |
| Gli3 | Gli3 | 2.74E-110 | 1.288264919 | 0.839 | 0.382 | 6.21E-106 | Astrocytes |
| Slc1a3 | Slc1a3 | 2.47E-109 | 1.049966431 | 0.978 | 0.624 | 5.62E-105 | Astrocytes |
| Gnao1 | Gnao1 | 2.32E-108 | 1.024509674 | 0.958 | 0.752 | 5.26E-104 | Astrocytes |
| Gpc6 | Gpc6 | 9.20E-107 | 1.231660449 | 0.901 | 0.493 | 2.09E-102 | Astrocytes |
| Mdga2 | Mdga2 | 1.53E-106 | 0.956999074 | 0.98 | 0.79 | 3.47E-102 | Astrocytes |
| Gm12239 | Gm12239 | 1.03E-102 | 1.411303161 | 0.787 | 0.33 | 2.33E-98 | Astrocytes |
| Luzp2 | Luzp2 | 6.50E-102 | 1.456904147 | 0.916 | 0.592 | 1.48E-97 | Astrocytes |
| Ctnnd2 | Ctnnd2 | 7.88E-101 | 0.735173731 | 0.995 | 0.952 | 1.79E-96 | Astrocytes |
| Trim9 | Trim9 | 8.76E-99 | 1.210259775 | 0.842 | 0.446 | 1.99E-94 | Astrocytes |
| Cspg5 | Cspg5 | 4.02E-98 | 1.188172866 | 0.839 | 0.408 | 9.14E-94 | Astrocytes |
| Sparcl1 | Sparcl1 | 4.24E-98 | 1.017316774 | 0.865 | 0.385 | 9.64E-94 | Astrocytes |
| Vcl | Vcl | 4.24E-98 | 1.382017281 | 0.651 | 0.214 | 9.64E-94 | Astrocytes |
| Syne1 | Syne1 | 5.78E-98 | 1.070971508 | 0.895 | 0.473 | 1.31E-93 | Astrocytes |
| Dgkb | Dgkb | 3.78E-95 | 0.844574329 | 0.988 | 0.864 | 8.58E-91 | Astrocytes |
| Tnik | Tnik | 1.63E-94 | 0.929743182 | 0.962 | 0.663 | 3.70E-90 | Astrocytes |
| Macf1 | Macf1 | 8.03E-94 | 0.782663458 | 0.99 | 0.91 | 1.82E-89 | Astrocytes |
| Nwd1 | Nwd1 | 4.91E-92 | 1.120989632 | 0.783 | 0.341 | 1.11E-87 | Astrocytes |
| Slco1c1 | Slco1c1 | 8.85E-92 | 1.134573729 | 0.76 | 0.292 | 2.01E-87 | Astrocytes |
| AC154683.1 | AC154683.1 | 1.16E-90 | 1.316368918 | 0.524 | 0.122 | 2.63E-86 | Astrocytes |
| Arhgap26 | Arhgap26 | 1.09E-88 | 1.183821384 | 0.785 | 0.38 | 2.48E-84 | Astrocytes |
| Bcan | Bcan | 2.98E-88 | 1.170383724 | 0.694 | 0.274 | 6.78E-84 | Astrocytes |
| B3galt1 | B3galt1 | 3.04E-88 | 0.784793891 | 0.987 | 0.834 | 6.91E-84 | Astrocytes |
| Dtna | Dtna | 2.47E-87 | 0.863698538 | 0.99 | 0.668 | 5.60E-83 | Astrocytes |
| Rgs20 | Rgs20 | 8.66E-87 | 0.883105662 | 0.977 | 0.655 | 1.97E-82 | Astrocytes |
| Garem1 | Garem1 | 8.04E-86 | 1.216252959 | 0.738 | 0.323 | 1.83E-81 | Astrocytes |
| Fam13c | Fam13c | 1.62E-85 | 1.240652464 | 0.674 | 0.281 | 3.69E-81 | Astrocytes |
| Phkg1 | Phkg1 | 1.11E-83 | 1.147106701 | 0.698 | 0.281 | 2.53E-79 | Astrocytes |
| Ptn | Ptn | 2.18E-83 | 1.1790162 | 0.826 | 0.509 | 4.95E-79 | Astrocytes |
| Npas3 | Npas3 | 6.40E-82 | 0.783904843 | 0.996 | 0.633 | 1.45E-77 | Astrocytes |
| Glis3 | Glis3 | 3.75E-81 | 1.121507511 | 0.763 | 0.339 | 8.53E-77 | Astrocytes |
| Celrr | Celrr | 5.06E-81 | 1.219038058 | 0.442 | 0.088 | 1.15E-76 | Astrocytes |
| Myo6 | Myo6 | 5.41E-81 | 1.060509734 | 0.802 | 0.422 | 1.23E-76 | Astrocytes |
| Lrrc4c | Lrrc4c | 1.71E-80 | 0.885187099 | 0.967 | 0.814 | 3.88E-76 | Astrocytes |
| Pde8b | Pde8b | 3.40E-79 | 1.119268791 | 0.744 | 0.361 | 7.72E-75 | Astrocytes |
| Eps8 | Eps8 | 7.25E-79 | 1.145247875 | 0.504 | 0.126 | 1.65E-74 | Astrocytes |
| Bmpr1b | Bmpr1b | 8.68E-79 | 1.067433337 | 0.795 | 0.368 | 1.97E-74 | Astrocytes |
| Cdh10 | Cdh10 | 2.78E-77 | 1.008896107 | 0.823 | 0.437 | 6.32E-73 | Astrocytes |
| Crym | Crym | 2.62E-76 | 1.466962541 | 0.507 | 0.15 | 5.95E-72 | Astrocytes |
| Plpp3 | Plpp3 | 2.12E-75 | 0.826189311 | 0.947 | 0.594 | 4.82E-71 | Astrocytes |
| Ddhd1 | Ddhd1 | 4.84E-75 | 0.913571724 | 0.818 | 0.419 | 1.10E-70 | Astrocytes |
| Trpm3 | Trpm3 | 5.70E-75 | 0.44025663 | 0.955 | 0.525 | 1.29E-70 | Astrocytes |
| Qk | Qk | 7.48E-74 | 0.723046185 | 0.977 | 0.827 | 1.70E-69 | Astrocytes |
| Appl2 | Appl2 | 1.93E-72 | 1.072483968 | 0.643 | 0.259 | 4.38E-68 | Astrocytes |
| Hdac8 | Hdac8 | 6.39E-72 | 0.832060644 | 0.914 | 0.634 | 1.45E-67 | Astrocytes |
| Farp1 | Farp1 | 5.04E-71 | 0.795415144 | 0.951 | 0.746 | 1.14E-66 | Astrocytes |
| Fnbp1 | Fnbp1 | 1.03E-70 | 0.932830503 | 0.814 | 0.424 | 2.33E-66 | Astrocytes |
| Plekhg1 | Plekhg1 | 1.23E-70 | 1.070550507 | 0.68 | 0.292 | 2.80E-66 | Astrocytes |
| Adam23 | Adam23 | 1.41E-70 | 0.989645074 | 0.763 | 0.409 | 3.20E-66 | Astrocytes |
| Adgrl3 | Adgrl3 | 1.92E-70 | 0.697848104 | 0.971 | 0.788 | 4.36E-66 | Astrocytes |
| Fam184b | Fam184b | 2.82E-70 | 1.097908812 | 0.405 | 0.082 | 6.41E-66 | Astrocytes |
| Slc39a12 | Slc39a12 | 8.94E-70 | 1.01050723 | 0.608 | 0.21 | 2.03E-65 | Astrocytes |
| Kcnma1 | Kcnma1 | 7.60E-69 | 1.042980642 | 0.743 | 0.385 | 1.73E-64 | Astrocytes |
| Nckap5 | Nckap5 | 1.10E-68 | 0.902900796 | 0.87 | 0.474 | 2.51E-64 | Astrocytes |
| Cpeb4 | Cpeb4 | 1.21E-68 | 1.033979808 | 0.756 | 0.433 | 2.74E-64 | Astrocytes |
| Mast4 | Mast4 | 1.55E-68 | 1.045008925 | 0.659 | 0.293 | 3.52E-64 | Astrocytes |
| Trps1 | Trps1 | 2.74E-68 | 0.756415374 | 0.945 | 0.696 | 6.23E-64 | Astrocytes |
| Dock1 | Dock1 | 2.85E-68 | 0.902599229 | 0.803 | 0.417 | 6.47E-64 | Astrocytes |
| Clybl | Clybl | 3.46E-67 | 1.036031902 | 0.557 | 0.193 | 7.86E-63 | Astrocytes |
| Gm48747 | Gm48747 | 1.92E-66 | 1.122982425 | 0.579 | 0.218 | 4.35E-62 | Astrocytes |
| Acsbg1 | Acsbg1 | 2.40E-66 | 1.032346589 | 0.588 | 0.215 | 5.45E-62 | Astrocytes |
| Kirrel3 | Kirrel3 | 3.43E-66 | 0.687149597 | 0.904 | 0.563 | 7.79E-62 | Astrocytes |
| Gm3764 | Gm3764 | 3.63E-66 | 0.737974905 | 0.967 | 0.783 | 8.26E-62 | Astrocytes |
| Lama2 | Lama2 | 1.76E-64 | 0.835548211 | 0.834 | 0.434 | 4.00E-60 | Astrocytes |
| Rgs6 | Rgs6 | 4.13E-64 | 0.901402547 | 0.775 | 0.383 | 9.38E-60 | Astrocytes |
| Gm26843 | Gm26843 | 2.45E-63 | 1.065058396 | 0.287 | 0.034 | 5.55E-59 | Astrocytes |
| Fam20a | Fam20a | 7.05E-63 | 0.960417823 | 0.52 | 0.162 | 1.60E-58 | Astrocytes |
| Phka1 | Phka1 | 1.39E-62 | 1.006023947 | 0.724 | 0.362 | 3.16E-58 | Astrocytes |
| Nim1k | Nim1k | 9.62E-62 | 0.940120542 | 0.581 | 0.222 | 2.19E-57 | Astrocytes |
| Ptprz1 | Ptprz1 | 1.11E-61 | 0.692454084 | 0.957 | 0.758 | 2.53E-57 | Astrocytes |
| Apoe | Apoe | 1.71E-61 | 0.734846976 | 0.943 | 0.712 | 3.88E-57 | Astrocytes |
| Paqr8 | Paqr8 | 3.00E-61 | 0.897544328 | 0.637 | 0.267 | 6.80E-57 | Astrocytes |
| Nhsl1 | Nhsl1 | 3.30E-61 | 0.873797696 | 0.726 | 0.349 | 7.50E-57 | Astrocytes |
| St3gal4 | St3gal4 | 6.80E-61 | 0.872328655 | 0.853 | 0.514 | 1.54E-56 | Astrocytes |
| Cadm2 | Cadm2 | 1.66E-60 | 0.514818949 | 1 | 0.97 | 3.76E-56 | Astrocytes |
| Grid1 | Grid1 | 1.89E-60 | 0.91037337 | 0.74 | 0.393 | 4.29E-56 | Astrocytes |
| RF01962 | RF01962 | 3.47E-60 | 0.977336975 | 0.701 | 0.34 | 7.87E-56 | Astrocytes |
| Sfxn5 | Sfxn5 | 2.41E-59 | 0.776016385 | 0.866 | 0.489 | 5.47E-55 | Astrocytes |
| Slc4a4 | Slc4a4 | 1.48E-58 | 0.54897405 | 0.945 | 0.645 | 3.36E-54 | Astrocytes |
| Efr3b | Efr3b | 1.77E-58 | 0.962277572 | 0.632 | 0.293 | 4.02E-54 | Astrocytes |
| Nrcam | Nrcam | 4.67E-58 | 0.759335359 | 0.898 | 0.614 | 1.06E-53 | Astrocytes |
| Phlpp1 | Phlpp1 | 7.92E-58 | 0.760783947 | 0.896 | 0.595 | 1.80E-53 | Astrocytes |
| Xylt1 | Xylt1 | 2.52E-57 | 0.917555917 | 0.595 | 0.242 | 5.72E-53 | Astrocytes |
| Hivep3 | Hivep3 | 2.59E-57 | 0.916351677 | 0.808 | 0.518 | 5.89E-53 | Astrocytes |
| Ddah1 | Ddah1 | 2.63E-57 | 0.921001408 | 0.663 | 0.309 | 5.98E-53 | Astrocytes |
| Gldc | Gldc | 3.22E-57 | 0.901491816 | 0.548 | 0.21 | 7.32E-53 | Astrocytes |
| Rcan2 | Rcan2 | 3.62E-56 | 1.101707796 | 0.605 | 0.291 | 8.23E-52 | Astrocytes |
| Il18 | Il18 | 9.95E-56 | 0.972588365 | 0.544 | 0.221 | 2.26E-51 | Astrocytes |
| Ghr | Ghr | 4.98E-55 | 0.902151911 | 0.603 | 0.258 | 1.13E-50 | Astrocytes |
| Lpp | Lpp | 1.62E-54 | 0.818457872 | 0.741 | 0.401 | 3.68E-50 | Astrocytes |
| Ttyh1 | Ttyh1 | 4.80E-54 | 0.82405998 | 0.744 | 0.411 | 1.09E-49 | Astrocytes |
| Sash1 | Sash1 | 2.97E-53 | 0.80658345 | 0.699 | 0.34 | 6.75E-49 | Astrocytes |
| Prdm16 | Prdm16 | 3.09E-53 | 0.740889127 | 0.734 | 0.366 | 7.01E-49 | Astrocytes |
| Add3 | Add3 | 4.55E-53 | 0.897297001 | 0.627 | 0.296 | 1.03E-48 | Astrocytes |
| Gfra1 | Gfra1 | 6.63E-53 | 0.810735183 | 0.594 | 0.238 | 1.51E-48 | Astrocytes |
| Shc3 | Shc3 | 6.79E-53 | 0.914147745 | 0.503 | 0.184 | 1.54E-48 | Astrocytes |
| Gm35188 | Gm35188 | 7.07E-53 | 0.893064648 | 0.679 | 0.349 | 1.60E-48 | Astrocytes |
| Irak2 | Irak2 | 1.88E-52 | 1.061469393 | 0.376 | 0.1 | 4.28E-48 | Astrocytes |
| Dpf3 | Dpf3 | 6.19E-52 | 0.919809049 | 0.438 | 0.142 | 1.41E-47 | Astrocytes |
| Abr | Abr | 6.56E-52 | 0.732095267 | 0.818 | 0.495 | 1.49E-47 | Astrocytes |
| Lypd6 | Lypd6 | 1.19E-51 | 0.98064423 | 0.36 | 0.091 | 2.70E-47 | Astrocytes |
| Wwc1 | Wwc1 | 2.24E-51 | 0.861070809 | 0.609 | 0.283 | 5.10E-47 | Astrocytes |
| Itpr2 | Itpr2 | 2.76E-51 | 0.895998013 | 0.508 | 0.188 | 6.27E-47 | Astrocytes |
| Dbx2 | Dbx2 | 3.04E-51 | 0.908157388 | 0.387 | 0.108 | 6.90E-47 | Astrocytes |
| Limch1 | Limch1 | 1.27E-50 | 0.808915257 | 0.674 | 0.331 | 2.89E-46 | Astrocytes |
| Gpm6b | Gpm6b | 1.99E-50 | 0.524548958 | 0.977 | 0.882 | 4.53E-46 | Astrocytes |
| Prex1 | Prex1 | 2.36E-50 | 0.895908171 | 0.428 | 0.14 | 5.35E-46 | Astrocytes |
| Adk | Adk | 2.94E-50 | 0.810356108 | 0.787 | 0.509 | 6.67E-46 | Astrocytes |
| Pdlim5 | Pdlim5 | 1.10E-49 | 0.908568406 | 0.577 | 0.261 | 2.49E-45 | Astrocytes |
| Fgfr3 | Fgfr3 | 6.95E-49 | 0.823526208 | 0.562 | 0.232 | 1.58E-44 | Astrocytes |
| Mapk4 | Mapk4 | 9.93E-49 | 0.766649936 | 0.774 | 0.472 | 2.25E-44 | Astrocytes |
| Gramd3 | Gramd3 | 1.69E-48 | 0.811031987 | 0.564 | 0.239 | 3.84E-44 | Astrocytes |
| Gphn | Gphn | 1.99E-48 | 0.581459427 | 0.977 | 0.894 | 4.51E-44 | Astrocytes |
| Gabbr2 | Gabbr2 | 2.08E-48 | 0.945192845 | 0.532 | 0.219 | 4.73E-44 | Astrocytes |
| Arhgap5 | Arhgap5 | 2.21E-48 | 0.712455592 | 0.824 | 0.532 | 5.01E-44 | Astrocytes |
| Thrb | Thrb | 5.07E-48 | 0.795167261 | 0.706 | 0.375 | 1.15E-43 | Astrocytes |
| Cpe | Cpe | 6.43E-48 | 0.568483291 | 0.97 | 0.829 | 1.46E-43 | Astrocytes |
| Ppp2r2b | Ppp2r2b | 1.30E-47 | 0.647272141 | 0.884 | 0.575 | 2.95E-43 | Astrocytes |
| Adcy2 | Adcy2 | 3.44E-47 | 0.729531296 | 0.759 | 0.426 | 7.81E-43 | Astrocytes |
| Vegfa | Vegfa | 3.53E-47 | 0.960265348 | 0.415 | 0.143 | 8.01E-43 | Astrocytes |
| Emx2os | Emx2os | 1.62E-46 | 0.818767914 | 0.336 | 0.085 | 3.68E-42 | Astrocytes |
| Mmd2 | Mmd2 | 2.35E-46 | 0.82177283 | 0.607 | 0.292 | 5.33E-42 | Astrocytes |
| Wnk2 | Wnk2 | 2.51E-46 | 0.774545022 | 0.697 | 0.39 | 5.70E-42 | Astrocytes |
| Shroom4 | Shroom4 | 5.24E-46 | 0.813592754 | 0.417 | 0.138 | 1.19E-41 | Astrocytes |
| Mical2 | Mical2 | 6.32E-46 | 0.800703192 | 0.562 | 0.239 | 1.44E-41 | Astrocytes |
| Nat8f3 | Nat8f3 | 9.30E-46 | 0.898269611 | 0.368 | 0.108 | 2.11E-41 | Astrocytes |
| Ccdc141 | Ccdc141 | 9.88E-46 | 0.823240622 | 0.483 | 0.184 | 2.24E-41 | Astrocytes |
| Mgll | Mgll | 1.46E-45 | 0.932933772 | 0.526 | 0.222 | 3.31E-41 | Astrocytes |
| Prdx6 | Prdx6 | 1.48E-45 | 0.762078561 | 0.622 | 0.3 | 3.37E-41 | Astrocytes |
| Spire1 | Spire1 | 1.56E-45 | 0.784228344 | 0.735 | 0.454 | 3.54E-41 | Astrocytes |
| Slc27a1 | Slc27a1 | 4.47E-45 | 0.853974765 | 0.569 | 0.268 | 1.01E-40 | Astrocytes |
| Rbms1 | Rbms1 | 5.55E-45 | 0.938686598 | 0.498 | 0.211 | 1.26E-40 | Astrocytes |
| Dock4 | Dock4 | 2.77E-44 | 0.612607171 | 0.901 | 0.666 | 6.29E-40 | Astrocytes |
| Arhgef12 | Arhgef12 | 3.67E-44 | 0.712611336 | 0.792 | 0.527 | 8.34E-40 | Astrocytes |
| Eva1a | Eva1a | 3.36E-43 | 0.767969455 | 0.344 | 0.097 | 7.64E-39 | Astrocytes |
| Alk | Alk | 3.49E-43 | 0.958377429 | 0.331 | 0.093 | 7.93E-39 | Astrocytes |
| Npas2 | Npas2 | 3.74E-43 | 0.864459551 | 0.49 | 0.198 | 8.50E-39 | Astrocytes |
| Acsl3 | Acsl3 | 1.49E-42 | 0.737263715 | 0.76 | 0.445 | 3.38E-38 | Astrocytes |
| Cyp4f15 | Cyp4f15 | 1.63E-42 | 0.766561779 | 0.321 | 0.086 | 3.70E-38 | Astrocytes |
| Fars2 | Fars2 | 2.50E-42 | 0.563622974 | 0.841 | 0.572 | 5.68E-38 | Astrocytes |
| Hepacam | Hepacam | 3.87E-42 | 0.720699368 | 0.652 | 0.344 | 8.80E-38 | Astrocytes |
| Sik3 | Sik3 | 4.74E-42 | 0.488729628 | 0.912 | 0.659 | 1.08E-37 | Astrocytes |
| F3 | F3 | 5.07E-42 | 0.737625481 | 0.547 | 0.244 | 1.15E-37 | Astrocytes |
| Prkd1 | Prkd1 | 5.54E-42 | 0.697289161 | 0.762 | 0.46 | 1.26E-37 | Astrocytes |
| Crlf3 | Crlf3 | 1.64E-41 | 0.839576129 | 0.547 | 0.267 | 3.72E-37 | Astrocytes |
| Csgalnact1 | Csgalnact1 | 1.98E-41 | 0.739028917 | 0.614 | 0.297 | 4.50E-37 | Astrocytes |
| Glul | Glul | 2.26E-41 | 0.796981348 | 0.618 | 0.326 | 5.14E-37 | Astrocytes |
| Fgd6 | Fgd6 | 2.31E-41 | 0.76839261 | 0.511 | 0.225 | 5.25E-37 | Astrocytes |
| Slc7a11 | Slc7a11 | 5.13E-41 | 1.027520854 | 0.456 | 0.186 | 1.16E-36 | Astrocytes |
| Mfap3l | Mfap3l | 1.79E-40 | 0.788764047 | 0.303 | 0.082 | 4.07E-36 | Astrocytes |
| Fgfr2 | Fgfr2 | 2.03E-40 | 0.61127938 | 0.915 | 0.748 | 4.60E-36 | Astrocytes |
| Myo10 | Myo10 | 2.26E-40 | 0.747367517 | 0.578 | 0.287 | 5.13E-36 | Astrocytes |
| Pygb | Pygb | 2.81E-40 | 0.737165528 | 0.625 | 0.313 | 6.38E-36 | Astrocytes |
| Cdh19 | Cdh19 | 4.00E-40 | 0.782529858 | 0.456 | 0.18 | 9.08E-36 | Astrocytes |
| Gm35552 | Gm35552 | 4.31E-40 | 0.77271285 | 0.317 | 0.087 | 9.78E-36 | Astrocytes |
| Cdh20 | Cdh20 | 6.08E-40 | 0.578466998 | 0.646 | 0.319 | 1.38E-35 | Astrocytes |
| Pid1 | Pid1 | 2.02E-39 | 0.719042975 | 0.685 | 0.396 | 4.59E-35 | Astrocytes |
| Fgf1 | Fgf1 | 6.46E-39 | 0.732480788 | 0.35 | 0.111 | 1.47E-34 | Astrocytes |
| Tjp1 | Tjp1 | 7.06E-39 | 0.924285218 | 0.633 | 0.384 | 1.60E-34 | Astrocytes |
| Gng12 | Gng12 | 8.94E-39 | 0.741638023 | 0.49 | 0.213 | 2.03E-34 | Astrocytes |
| Pdzph1 | Pdzph1 | 1.44E-38 | 0.812537355 | 0.369 | 0.127 | 3.28E-34 | Astrocytes |
| Fmn2 | Fmn2 | 3.57E-38 | 0.566797374 | 0.894 | 0.681 | 8.10E-34 | Astrocytes |
| Megf10 | Megf10 | 4.65E-38 | 0.743173988 | 0.465 | 0.193 | 1.06E-33 | Astrocytes |
| Rasa2 | Rasa2 | 6.42E-38 | 0.738701726 | 0.634 | 0.356 | 1.46E-33 | Astrocytes |
| Robo1 | Robo1 | 7.86E-38 | 0.729197164 | 0.656 | 0.386 | 1.79E-33 | Astrocytes |
| Swap70 | Swap70 | 7.94E-38 | 0.746849298 | 0.345 | 0.111 | 1.80E-33 | Astrocytes |
| Agl | Agl | 1.01E-37 | 0.777721899 | 0.436 | 0.183 | 2.29E-33 | Astrocytes |
| Mcu | Mcu | 1.12E-37 | 0.772320708 | 0.527 | 0.251 | 2.54E-33 | Astrocytes |
| Sycp2 | Sycp2 | 1.66E-37 | 0.74944833 | 0.336 | 0.105 | 3.77E-33 | Astrocytes |
| Asrgl1 | Asrgl1 | 1.86E-37 | 0.722766109 | 0.582 | 0.299 | 4.22E-33 | Astrocytes |
| Arhgef26 | Arhgef26 | 2.80E-37 | 0.65391933 | 0.669 | 0.367 | 6.37E-33 | Astrocytes |
| Gk | Gk | 3.11E-37 | 0.785077837 | 0.487 | 0.217 | 7.06E-33 | Astrocytes |
| Ston2 | Ston2 | 5.22E-37 | 0.701923139 | 0.578 | 0.293 | 1.19E-32 | Astrocytes |
| Agmo | Agmo | 9.44E-37 | 0.866333022 | 0.395 | 0.152 | 2.14E-32 | Astrocytes |
| Zfp521 | Zfp521 | 1.13E-36 | 0.636195678 | 0.608 | 0.312 | 2.56E-32 | Astrocytes |
| Dennd1a | Dennd1a | 1.77E-36 | 0.531138914 | 0.912 | 0.691 | 4.02E-32 | Astrocytes |
| Arhgef4 | Arhgef4 | 1.78E-36 | 0.703826297 | 0.645 | 0.35 | 4.04E-32 | Astrocytes |
| Nxn | Nxn | 9.49E-36 | 0.570888957 | 0.674 | 0.362 | 2.16E-31 | Astrocytes |
| Maml2 | Maml2 | 1.03E-35 | 0.530311664 | 0.922 | 0.711 | 2.35E-31 | Astrocytes |
| Msi2 | Msi2 | 1.07E-35 | 0.363836814 | 0.995 | 0.931 | 2.43E-31 | Astrocytes |
| Tcf7l2 | Tcf7l2 | 1.11E-35 | 0.626219793 | 0.7 | 0.399 | 2.53E-31 | Astrocytes |
| Tmem164 | Tmem164 | 1.29E-35 | 0.64653186 | 0.67 | 0.381 | 2.92E-31 | Astrocytes |
| Galnt18 | Galnt18 | 1.61E-35 | 0.781947573 | 0.473 | 0.208 | 3.65E-31 | Astrocytes |
| Rfx4 | Rfx4 | 2.40E-35 | 0.598160936 | 0.651 | 0.346 | 5.44E-31 | Astrocytes |
| Fermt2 | Fermt2 | 3.39E-35 | 0.731193828 | 0.54 | 0.278 | 7.70E-31 | Astrocytes |
| 9430041J12Rik | 9430041J12Rik | 4.40E-35 | 0.674993985 | 0.452 | 0.189 | 9.99E-31 | Astrocytes |
| Tenm3 | Tenm3 | 6.52E-35 | 0.415161711 | 0.87 | 0.627 | 1.48E-30 | Astrocytes |
| Ugp2 | Ugp2 | 7.41E-35 | 0.661661476 | 0.595 | 0.317 | 1.68E-30 | Astrocytes |
| Lncpint | Lncpint | 7.93E-35 | 0.585766648 | 0.787 | 0.529 | 1.80E-30 | Astrocytes |
| Eda | Eda | 1.17E-34 | 0.640342883 | 0.599 | 0.32 | 2.67E-30 | Astrocytes |
| Fam184a | Fam184a | 1.60E-34 | 0.729744408 | 0.486 | 0.234 | 3.63E-30 | Astrocytes |
| Usp54 | Usp54 | 2.53E-34 | 0.743811636 | 0.495 | 0.244 | 5.74E-30 | Astrocytes |
| Ablim1 | Ablim1 | 2.80E-34 | 0.742646912 | 0.425 | 0.18 | 6.35E-30 | Astrocytes |
| Pde7b | Pde7b | 3.46E-34 | 0.760325246 | 0.615 | 0.362 | 7.86E-30 | Astrocytes |
| Glud1 | Glud1 | 1.11E-33 | 0.668038048 | 0.683 | 0.411 | 2.51E-29 | Astrocytes |
| Snta1 | Snta1 | 1.16E-33 | 0.765517827 | 0.406 | 0.171 | 2.64E-29 | Astrocytes |
| D030047H15Rik | D030047H15Rik | 1.62E-33 | 0.77498451 | 0.345 | 0.126 | 3.69E-29 | Astrocytes |
| Dzip1l | Dzip1l | 1.94E-33 | 0.704901396 | 0.269 | 0.076 | 4.41E-29 | Astrocytes |
| Lgr4 | Lgr4 | 1.96E-33 | 0.760937259 | 0.427 | 0.189 | 4.46E-29 | Astrocytes |
| Pdgfrb | Pdgfrb | 3.92E-33 | 0.68952816 | 0.283 | 0.084 | 8.90E-29 | Astrocytes |
| Fat3 | Fat3 | 4.42E-33 | 0.535369031 | 0.664 | 0.366 | 1.00E-28 | Astrocytes |
| Rreb1 | Rreb1 | 9.27E-33 | 0.70549994 | 0.412 | 0.168 | 2.11E-28 | Astrocytes |
| Ntsr2 | Ntsr2 | 4.79E-32 | 0.647094879 | 0.456 | 0.201 | 1.09E-27 | Astrocytes |
| Gpam | Gpam | 6.11E-32 | 0.666320507 | 0.406 | 0.169 | 1.39E-27 | Astrocytes |
| Epas1 | Epas1 | 1.34E-31 | 0.692050278 | 0.297 | 0.097 | 3.03E-27 | Astrocytes |
| Chd9 | Chd9 | 1.73E-31 | 0.546215534 | 0.849 | 0.657 | 3.92E-27 | Astrocytes |
| Gm40578 | Gm40578 | 2.10E-31 | 0.670030361 | 0.434 | 0.19 | 4.76E-27 | Astrocytes |
| Crot | Crot | 4.13E-31 | 0.691824117 | 0.318 | 0.111 | 9.38E-27 | Astrocytes |
| Hif3a | Hif3a | 4.55E-31 | 0.644838682 | 0.428 | 0.186 | 1.03E-26 | Astrocytes |
| Shisa9 | Shisa9 | 5.23E-31 | 0.661844751 | 0.534 | 0.275 | 1.19E-26 | Astrocytes |
| Phactr3 | Phactr3 | 1.25E-30 | 0.61854784 | 0.63 | 0.373 | 2.84E-26 | Astrocytes |
| Kcnn3 | Kcnn3 | 1.45E-30 | 0.745767557 | 0.394 | 0.173 | 3.30E-26 | Astrocytes |
| Nkx2-2os | Nkx2-2os | 1.46E-30 | 0.724919446 | 0.286 | 0.091 | 3.32E-26 | Astrocytes |
| Palld | Palld | 1.54E-30 | 0.713267572 | 0.421 | 0.187 | 3.49E-26 | Astrocytes |
| Vav3 | Vav3 | 2.28E-30 | 0.652957638 | 0.345 | 0.132 | 5.18E-26 | Astrocytes |
| Trp53bp2 | Trp53bp2 | 4.86E-30 | 0.706045118 | 0.361 | 0.148 | 1.10E-25 | Astrocytes |
| Adgrb3 | Adgrb3 | 7.46E-30 | 0.337535469 | 0.992 | 0.898 | 1.69E-25 | Astrocytes |
| Grk3 | Grk3 | 7.48E-30 | 0.564370741 | 0.682 | 0.417 | 1.70E-25 | Astrocytes |
| Rapgef3 | Rapgef3 | 9.37E-30 | 0.671595012 | 0.358 | 0.145 | 2.13E-25 | Astrocytes |
| Lix1 | Lix1 | 2.70E-29 | 0.756300195 | 0.417 | 0.193 | 6.14E-25 | Astrocytes |
| Specc1 | Specc1 | 6.21E-29 | 0.725569705 | 0.491 | 0.263 | 1.41E-24 | Astrocytes |
| Slc7a2 | Slc7a2 | 1.01E-28 | 0.708329401 | 0.361 | 0.152 | 2.30E-24 | Astrocytes |
| Nr3c2 | Nr3c2 | 1.07E-28 | 0.43901138 | 0.753 | 0.452 | 2.44E-24 | Astrocytes |
| Tprkb | Tprkb | 1.15E-28 | 0.623933705 | 0.481 | 0.238 | 2.62E-24 | Astrocytes |
| Tox2 | Tox2 | 1.46E-28 | 0.69419173 | 0.327 | 0.128 | 3.31E-24 | Astrocytes |
| Nlgn1 | Nlgn1 | 2.00E-28 | 0.345016994 | 0.992 | 0.914 | 4.54E-24 | Astrocytes |
| Sema6d | Sema6d | 2.15E-28 | 0.534528794 | 0.7 | 0.438 | 4.89E-24 | Astrocytes |
| Igsf8 | Igsf8 | 2.69E-28 | 0.650295583 | 0.399 | 0.184 | 6.10E-24 | Astrocytes |
| Gli2 | Gli2 | 3.18E-28 | 0.604382502 | 0.502 | 0.256 | 7.23E-24 | Astrocytes |
| Ephb1 | Ephb1 | 3.56E-28 | 0.56491192 | 0.614 | 0.352 | 8.08E-24 | Astrocytes |
| Dab1 | Dab1 | 4.41E-28 | 0.418250414 | 0.78 | 0.516 | 1.00E-23 | Astrocytes |
| Tle4 | Tle4 | 6.28E-28 | 0.625257115 | 0.573 | 0.334 | 1.43E-23 | Astrocytes |
| Slc15a2 | Slc15a2 | 6.90E-28 | 0.615062459 | 0.364 | 0.154 | 1.57E-23 | Astrocytes |
| Pard3b | Pard3b | 1.97E-27 | 0.442597332 | 0.775 | 0.47 | 4.47E-23 | Astrocytes |
| Papss2 | Papss2 | 2.14E-27 | 0.674421643 | 0.264 | 0.088 | 4.86E-23 | Astrocytes |
| St5 | St5 | 3.90E-27 | 0.622790587 | 0.346 | 0.143 | 8.87E-23 | Astrocytes |
| Wasf3 | Wasf3 | 5.50E-27 | 0.655512674 | 0.479 | 0.255 | 1.25E-22 | Astrocytes |
| Hlf | Hlf | 6.13E-27 | 0.621880906 | 0.552 | 0.31 | 1.39E-22 | Astrocytes |
| Caskin1 | Caskin1 | 7.01E-27 | 0.648708028 | 0.422 | 0.205 | 1.59E-22 | Astrocytes |
| Aldh1l1 | Aldh1l1 | 7.37E-27 | 0.62684123 | 0.335 | 0.135 | 1.67E-22 | Astrocytes |
| Pbxip1 | Pbxip1 | 8.93E-27 | 0.570865532 | 0.28 | 0.097 | 2.03E-22 | Astrocytes |
| Acss1 | Acss1 | 9.49E-27 | 0.5616631 | 0.597 | 0.343 | 2.16E-22 | Astrocytes |
| Ngef | Ngef | 1.08E-26 | 0.653393283 | 0.429 | 0.213 | 2.46E-22 | Astrocytes |
| Zfpm2 | Zfpm2 | 1.55E-26 | 0.429670141 | 0.816 | 0.534 | 3.52E-22 | Astrocytes |
| Kcnk1 | Kcnk1 | 1.72E-26 | 0.613012534 | 0.271 | 0.095 | 3.90E-22 | Astrocytes |
| Ndrg2 | Ndrg2 | 1.84E-26 | 0.558891167 | 0.544 | 0.302 | 4.19E-22 | Astrocytes |
| Epb41l2 | Epb41l2 | 4.03E-26 | 0.593036453 | 0.501 | 0.27 | 9.15E-22 | Astrocytes |
| 4930402H24Rik | 4930402H24Rik | 7.69E-26 | 0.405015121 | 0.944 | 0.829 | 1.75E-21 | Astrocytes |
| Tcf7l1 | Tcf7l1 | 8.15E-26 | 0.572265651 | 0.442 | 0.216 | 1.85E-21 | Astrocytes |
| Lonrf3 | Lonrf3 | 8.34E-26 | 0.619487805 | 0.25 | 0.083 | 1.89E-21 | Astrocytes |
| Aifm3 | Aifm3 | 8.58E-26 | 0.597363975 | 0.269 | 0.094 | 1.95E-21 | Astrocytes |
| Arap2 | Arap2 | 8.69E-26 | 0.531862227 | 0.615 | 0.355 | 1.97E-21 | Astrocytes |
| Pnpla7 | Pnpla7 | 1.00E-25 | 0.597915068 | 0.553 | 0.313 | 2.28E-21 | Astrocytes |
| Slc9a9 | Slc9a9 | 1.22E-25 | 0.670447913 | 0.459 | 0.242 | 2.77E-21 | Astrocytes |
| Gria2 | Gria2 | 1.27E-25 | 0.433510083 | 0.938 | 0.836 | 2.89E-21 | Astrocytes |
| Frmpd1 | Frmpd1 | 1.34E-25 | 0.607088461 | 0.286 | 0.106 | 3.03E-21 | Astrocytes |
| Camk2g | Camk2g | 1.36E-25 | 0.506424415 | 0.585 | 0.339 | 3.08E-21 | Astrocytes |
| Son | Son | 2.19E-25 | 0.500040089 | 0.81 | 0.636 | 4.98E-21 | Astrocytes |
| Nfia | Nfia | 3.30E-25 | 0.354687724 | 0.984 | 0.851 | 7.49E-21 | Astrocytes |
| Rab31 | Rab31 | 3.56E-25 | 0.658394233 | 0.446 | 0.235 | 8.09E-21 | Astrocytes |
| Utrn | Utrn | 4.33E-25 | 0.569809833 | 0.594 | 0.357 | 9.84E-21 | Astrocytes |
| Mras | Mras | 4.72E-25 | 0.565056176 | 0.428 | 0.214 | 1.07E-20 | Astrocytes |
| Rgma | Rgma | 5.26E-25 | 0.56956253 | 0.522 | 0.285 | 1.20E-20 | Astrocytes |
| Etv5 | Etv5 | 7.12E-25 | 0.596845671 | 0.296 | 0.115 | 1.62E-20 | Astrocytes |
| Bmp2k | Bmp2k | 7.72E-25 | 0.579801859 | 0.354 | 0.159 | 1.75E-20 | Astrocytes |
| Ppara | Ppara | 1.60E-24 | 0.599408271 | 0.26 | 0.094 | 3.63E-20 | Astrocytes |
| Plcd4 | Plcd4 | 1.89E-24 | 0.558826032 | 0.312 | 0.125 | 4.29E-20 | Astrocytes |
| Washc2 | Washc2 | 2.86E-24 | 0.613406767 | 0.338 | 0.15 | 6.50E-20 | Astrocytes |
| Hacd2 | Hacd2 | 2.99E-24 | 0.601024667 | 0.428 | 0.219 | 6.79E-20 | Astrocytes |
| Pla2g7 | Pla2g7 | 3.34E-24 | 0.52690507 | 0.339 | 0.143 | 7.58E-20 | Astrocytes |
| Phkb | Phkb | 3.94E-24 | 0.548875263 | 0.625 | 0.394 | 8.95E-20 | Astrocytes |
| Leng8 | Leng8 | 4.00E-24 | 0.581541787 | 0.423 | 0.212 | 9.09E-20 | Astrocytes |
| Rb1 | Rb1 | 4.62E-24 | 0.555924762 | 0.6 | 0.384 | 1.05E-19 | Astrocytes |
| Eps15 | Eps15 | 6.16E-24 | 0.447797551 | 0.695 | 0.44 | 1.40E-19 | Astrocytes |
| Adhfe1 | Adhfe1 | 1.04E-23 | 0.58305509 | 0.357 | 0.161 | 2.36E-19 | Astrocytes |
| Ppargc1a | Ppargc1a | 1.08E-23 | 0.566640697 | 0.487 | 0.265 | 2.44E-19 | Astrocytes |
| Acer3 | Acer3 | 1.11E-23 | 0.641460262 | 0.326 | 0.139 | 2.53E-19 | Astrocytes |
| Ptpn13 | Ptpn13 | 1.39E-23 | 0.562400706 | 0.456 | 0.236 | 3.15E-19 | Astrocytes |
| Sema4d | Sema4d | 1.48E-23 | 0.571803265 | 0.333 | 0.143 | 3.36E-19 | Astrocytes |
| Arhgef10l | Arhgef10l | 1.85E-23 | 0.618031009 | 0.458 | 0.254 | 4.21E-19 | Astrocytes |
| Tank | Tank | 1.94E-23 | 0.600799376 | 0.379 | 0.183 | 4.40E-19 | Astrocytes |
| Fjx1 | Fjx1 | 2.07E-23 | 0.59646241 | 0.266 | 0.101 | 4.71E-19 | Astrocytes |
| Fut9 | Fut9 | 2.60E-23 | 0.553770775 | 0.698 | 0.479 | 5.91E-19 | Astrocytes |
| Timp3 | Timp3 | 3.08E-23 | 0.614482244 | 0.479 | 0.264 | 7.00E-19 | Astrocytes |
| Mtss1l | Mtss1l | 4.04E-23 | 0.576620732 | 0.427 | 0.221 | 9.18E-19 | Astrocytes |
| Gabrg1 | Gabrg1 | 5.49E-23 | 0.562142006 | 0.339 | 0.15 | 1.25E-18 | Astrocytes |
| Carmil1 | Carmil1 | 6.62E-23 | 0.467041472 | 0.581 | 0.344 | 1.50E-18 | Astrocytes |
| Alcam | Alcam | 8.69E-23 | 0.489947403 | 0.781 | 0.58 | 1.97E-18 | Astrocytes |
| Dkk3 | Dkk3 | 1.39E-22 | 0.470015952 | 0.452 | 0.227 | 3.15E-18 | Astrocytes |
| Cyp7b1 | Cyp7b1 | 1.61E-22 | 0.499182992 | 0.407 | 0.202 | 3.66E-18 | Astrocytes |
| Stox2 | Stox2 | 2.09E-22 | 0.425052662 | 0.872 | 0.757 | 4.76E-18 | Astrocytes |
| Prodh | Prodh | 3.05E-22 | 0.560096659 | 0.338 | 0.155 | 6.92E-18 | Astrocytes |
| Capn2 | Capn2 | 3.64E-22 | 0.587196901 | 0.327 | 0.15 | 8.28E-18 | Astrocytes |
| Znrf3 | Znrf3 | 3.74E-22 | 0.549938993 | 0.64 | 0.415 | 8.50E-18 | Astrocytes |
| Gm973 | Gm973 | 4.83E-22 | 0.394213223 | 0.656 | 0.388 | 1.10E-17 | Astrocytes |
| Mfhas1 | Mfhas1 | 6.19E-22 | 0.568939964 | 0.264 | 0.103 | 1.41E-17 | Astrocytes |
| Csrp1 | Csrp1 | 8.48E-22 | 0.554724868 | 0.381 | 0.186 | 1.93E-17 | Astrocytes |
| Serpine2 | Serpine2 | 1.32E-21 | 0.533944933 | 0.533 | 0.316 | 2.99E-17 | Astrocytes |
| Cep85l | Cep85l | 1.36E-21 | 0.418536545 | 0.589 | 0.349 | 3.09E-17 | Astrocytes |
| Tjp2 | Tjp2 | 1.48E-21 | 0.498299644 | 0.374 | 0.179 | 3.36E-17 | Astrocytes |
| Soat1 | Soat1 | 1.54E-21 | 0.551635614 | 0.378 | 0.186 | 3.50E-17 | Astrocytes |
| Acsl6 | Acsl6 | 2.13E-21 | 0.569444621 | 0.455 | 0.253 | 4.83E-17 | Astrocytes |
| Bcl2 | Bcl2 | 2.13E-21 | 0.474799783 | 0.636 | 0.397 | 4.84E-17 | Astrocytes |
| Atp13a4 | Atp13a4 | 2.76E-21 | 0.34411603 | 0.325 | 0.135 | 6.28E-17 | Astrocytes |
| Aff1 | Aff1 | 3.34E-21 | 0.575310065 | 0.416 | 0.225 | 7.58E-17 | Astrocytes |
| Smarca2 | Smarca2 | 4.08E-21 | 0.544585433 | 0.578 | 0.372 | 9.26E-17 | Astrocytes |
| Myh14 | Myh14 | 5.13E-21 | 0.489990547 | 0.258 | 0.101 | 1.17E-16 | Astrocytes |
| Nebl | Nebl | 6.58E-21 | 0.41434626 | 0.613 | 0.387 | 1.49E-16 | Astrocytes |
| Wwtr1 | Wwtr1 | 6.89E-21 | 0.48415218 | 0.424 | 0.219 | 1.57E-16 | Astrocytes |
| Notch1 | Notch1 | 1.04E-20 | 0.556141093 | 0.411 | 0.225 | 2.36E-16 | Astrocytes |
| Mcc | Mcc | 1.04E-20 | 0.40213395 | 0.558 | 0.318 | 2.37E-16 | Astrocytes |
| Brinp3 | Brinp3 | 1.14E-20 | 0.498454119 | 0.504 | 0.3 | 2.59E-16 | Astrocytes |
| Sybu | Sybu | 1.30E-20 | 0.458601674 | 0.602 | 0.384 | 2.94E-16 | Astrocytes |
| Scg3 | Scg3 | 1.61E-20 | 0.53621719 | 0.498 | 0.296 | 3.66E-16 | Astrocytes |
| Tnfrsf19 | Tnfrsf19 | 1.93E-20 | 0.251611952 | 0.472 | 0.239 | 4.38E-16 | Astrocytes |
| Sugct | Sugct | 2.61E-20 | 0.520191685 | 0.431 | 0.23 | 5.93E-16 | Astrocytes |
| Fgfr1 | Fgfr1 | 3.37E-20 | 0.582163738 | 0.38 | 0.2 | 7.65E-16 | Astrocytes |
| Sat1 | Sat1 | 4.74E-20 | 0.491690684 | 0.277 | 0.118 | 1.08E-15 | Astrocytes |
| Nsmf | Nsmf | 6.92E-20 | 0.526198224 | 0.265 | 0.111 | 1.57E-15 | Astrocytes |
| Rabep1 | Rabep1 | 7.29E-20 | 0.553583356 | 0.645 | 0.453 | 1.65E-15 | Astrocytes |
| Rab30 | Rab30 | 8.78E-20 | 0.451573497 | 0.602 | 0.391 | 1.99E-15 | Astrocytes |
| Zhx3 | Zhx3 | 1.86E-19 | 0.478428929 | 0.601 | 0.383 | 4.24E-15 | Astrocytes |
| Ank2 | Ank2 | 2.10E-19 | 0.298527301 | 0.969 | 0.931 | 4.76E-15 | Astrocytes |
| Slc7a10 | Slc7a10 | 2.50E-19 | 0.484897117 | 0.299 | 0.134 | 5.67E-15 | Astrocytes |
| Zfp423 | Zfp423 | 2.60E-19 | 0.49419946 | 0.332 | 0.157 | 5.91E-15 | Astrocytes |
| Kif1b | Kif1b | 2.69E-19 | 0.356235866 | 0.886 | 0.775 | 6.10E-15 | Astrocytes |
| Fam107a | Fam107a | 4.81E-19 | 0.488496343 | 0.281 | 0.123 | 1.09E-14 | Astrocytes |
| Lrp4 | Lrp4 | 6.84E-19 | 0.482935957 | 0.308 | 0.142 | 1.55E-14 | Astrocytes |
| Abcd2 | Abcd2 | 9.37E-19 | 0.534283614 | 0.27 | 0.118 | 2.13E-14 | Astrocytes |
| Ahcyl2 | Ahcyl2 | 1.02E-18 | 0.488956634 | 0.542 | 0.337 | 2.31E-14 | Astrocytes |
| Eci2 | Eci2 | 2.58E-18 | 0.541861627 | 0.295 | 0.139 | 5.86E-14 | Astrocytes |
| Cables1 | Cables1 | 3.54E-18 | 0.426393604 | 0.478 | 0.274 | 8.04E-14 | Astrocytes |
| Vwa8 | Vwa8 | 3.75E-18 | 0.554239756 | 0.467 | 0.284 | 8.52E-14 | Astrocytes |
| Ttyh3 | Ttyh3 | 4.55E-18 | 0.504078024 | 0.435 | 0.255 | 1.03E-13 | Astrocytes |
| Klhl5 | Klhl5 | 5.15E-18 | 0.482666052 | 0.346 | 0.175 | 1.17E-13 | Astrocytes |
| Mgat5 | Mgat5 | 8.29E-18 | 0.427277265 | 0.698 | 0.507 | 1.88E-13 | Astrocytes |
| Plekha7 | Plekha7 | 8.71E-18 | 0.498034821 | 0.303 | 0.143 | 1.98E-13 | Astrocytes |
| Sorcs2 | Sorcs2 | 8.91E-18 | 0.422104704 | 0.449 | 0.256 | 2.02E-13 | Astrocytes |
| Magi3 | Magi3 | 1.12E-17 | 0.553632559 | 0.478 | 0.295 | 2.54E-13 | Astrocytes |
| Fhit | Fhit | 1.31E-17 | 0.516913154 | 0.559 | 0.374 | 2.97E-13 | Astrocytes |
| Nfasc | Nfasc | 1.79E-17 | 0.446164446 | 0.372 | 0.196 | 4.07E-13 | Astrocytes |
| Gm45881 | Gm45881 | 2.01E-17 | 0.612001712 | 0.287 | 0.14 | 4.56E-13 | Astrocytes |
| Gramd1b | Gramd1b | 2.50E-17 | 0.4324091 | 0.471 | 0.281 | 5.67E-13 | Astrocytes |
| Foxo1 | Foxo1 | 2.64E-17 | 0.432164382 | 0.514 | 0.315 | 5.99E-13 | Astrocytes |
| Cpq | Cpq | 3.85E-17 | 0.497716913 | 0.415 | 0.237 | 8.75E-13 | Astrocytes |
| Ap3m1 | Ap3m1 | 3.95E-17 | 0.499379145 | 0.259 | 0.118 | 8.98E-13 | Astrocytes |
| Atp8a1 | Atp8a1 | 4.38E-17 | 0.450441877 | 0.645 | 0.462 | 9.96E-13 | Astrocytes |
| Bcar3 | Bcar3 | 4.53E-17 | 0.448006138 | 0.382 | 0.206 | 1.03E-12 | Astrocytes |
| Hip1 | Hip1 | 4.73E-17 | 0.485623853 | 0.411 | 0.237 | 1.08E-12 | Astrocytes |
| Pcdh17 | Pcdh17 | 5.37E-17 | 0.433986654 | 0.546 | 0.347 | 1.22E-12 | Astrocytes |
| Tspan9 | Tspan9 | 5.73E-17 | 0.450424745 | 0.425 | 0.242 | 1.30E-12 | Astrocytes |
| Oxct1 | Oxct1 | 6.78E-17 | 0.499611543 | 0.563 | 0.384 | 1.54E-12 | Astrocytes |
| Tox | Tox | 7.53E-17 | 0.389636819 | 0.64 | 0.434 | 1.71E-12 | Astrocytes |
| Abhd3 | Abhd3 | 8.54E-17 | 0.498103225 | 0.266 | 0.122 | 1.94E-12 | Astrocytes |
| Gja1 | Gja1 | 1.26E-16 | 0.441330309 | 0.481 | 0.288 | 2.85E-12 | Astrocytes |
| Lgi4 | Lgi4 | 1.49E-16 | 0.427627152 | 0.263 | 0.119 | 3.39E-12 | Astrocytes |
| Clu | Clu | 2.18E-16 | 0.427045135 | 0.407 | 0.231 | 4.95E-12 | Astrocytes |
| Gm26917 | Gm26917 | 2.47E-16 | 0.502040315 | 0.37 | 0.21 | 5.61E-12 | Astrocytes |
| Bckdhb | Bckdhb | 2.75E-16 | 0.482324105 | 0.382 | 0.213 | 6.25E-12 | Astrocytes |
| Arrb1 | Arrb1 | 3.23E-16 | 0.441022418 | 0.345 | 0.185 | 7.34E-12 | Astrocytes |
| Fbxl17 | Fbxl17 | 3.46E-16 | 0.430638233 | 0.691 | 0.511 | 7.87E-12 | Astrocytes |
| Chst11 | Chst11 | 4.56E-16 | 0.452977411 | 0.379 | 0.212 | 1.04E-11 | Astrocytes |
| Cry2 | Cry2 | 4.93E-16 | 0.526289907 | 0.362 | 0.207 | 1.12E-11 | Astrocytes |
| Dlg5 | Dlg5 | 5.13E-16 | 0.447399825 | 0.293 | 0.144 | 1.17E-11 | Astrocytes |
| Abat | Abat | 5.75E-16 | 0.438643412 | 0.529 | 0.348 | 1.31E-11 | Astrocytes |
| Wwc2 | Wwc2 | 6.48E-16 | 0.468915118 | 0.319 | 0.167 | 1.47E-11 | Astrocytes |
| Chpt1 | Chpt1 | 1.01E-15 | 0.421277228 | 0.427 | 0.246 | 2.30E-11 | Astrocytes |
| Ptprd | Ptprd | 1.24E-15 | 0.305183735 | 0.9 | 0.787 | 2.81E-11 | Astrocytes |
| Ivd | Ivd | 1.50E-15 | 0.444375627 | 0.389 | 0.223 | 3.42E-11 | Astrocytes |
| Cpeb1 | Cpeb1 | 1.85E-15 | 0.496422365 | 0.29 | 0.149 | 4.19E-11 | Astrocytes |
| Fam228b | Fam228b | 2.74E-15 | 0.436302847 | 0.352 | 0.194 | 6.21E-11 | Astrocytes |
| Tmc7 | Tmc7 | 3.32E-15 | 0.417090733 | 0.288 | 0.143 | 7.54E-11 | Astrocytes |
| Gpd2 | Gpd2 | 3.40E-15 | 0.460379939 | 0.332 | 0.179 | 7.72E-11 | Astrocytes |
| 2610035D17Rik | 2610035D17Rik | 3.78E-15 | 0.426236162 | 0.55 | 0.371 | 8.60E-11 | Astrocytes |
| Fads2 | Fads2 | 3.87E-15 | 0.44601975 | 0.37 | 0.21 | 8.79E-11 | Astrocytes |
| Nfat5 | Nfat5 | 4.23E-15 | 0.390218687 | 0.676 | 0.507 | 9.62E-11 | Astrocytes |
| Itgav | Itgav | 5.29E-15 | 0.452966258 | 0.345 | 0.194 | 1.20E-10 | Astrocytes |
| Tulp3 | Tulp3 | 5.30E-15 | 0.501736993 | 0.392 | 0.23 | 1.20E-10 | Astrocytes |
| Cox10 | Cox10 | 6.79E-15 | 0.468508556 | 0.269 | 0.134 | 1.54E-10 | Astrocytes |
| Pcdh11x | Pcdh11x | 7.21E-15 | 0.434250305 | 0.559 | 0.386 | 1.64E-10 | Astrocytes |
| Gm26835 | Gm26835 | 9.42E-15 | 0.408629303 | 0.302 | 0.158 | 2.14E-10 | Astrocytes |
| Oxr1 | Oxr1 | 1.28E-14 | 0.350673236 | 0.52 | 0.35 | 2.91E-10 | Astrocytes |
| Mitf | Mitf | 1.30E-14 | 0.411120014 | 0.27 | 0.132 | 2.96E-10 | Astrocytes |
| Cpeb3 | Cpeb3 | 1.35E-14 | 0.441445518 | 0.565 | 0.397 | 3.06E-10 | Astrocytes |
| Gulp1 | Gulp1 | 1.60E-14 | 0.469736703 | 0.375 | 0.218 | 3.64E-10 | Astrocytes |
| S1pr1 | S1pr1 | 1.83E-14 | 0.41207587 | 0.306 | 0.157 | 4.15E-10 | Astrocytes |
| Zcchc24 | Zcchc24 | 1.87E-14 | 0.422623093 | 0.282 | 0.143 | 4.25E-10 | Astrocytes |
| Gpm6a | Gpm6a | 2.14E-14 | 0.305148799 | 0.914 | 0.837 | 4.85E-10 | Astrocytes |
| Gna13 | Gna13 | 2.52E-14 | 0.446262663 | 0.367 | 0.213 | 5.72E-10 | Astrocytes |
| Itga6 | Itga6 | 3.10E-14 | 0.390050985 | 0.36 | 0.198 | 7.04E-10 | Astrocytes |
| Klf9 | Klf9 | 5.39E-14 | 0.439730115 | 0.413 | 0.253 | 1.22E-09 | Astrocytes |
| Nme7 | Nme7 | 7.10E-14 | 0.405490258 | 0.481 | 0.311 | 1.61E-09 | Astrocytes |
| Pdgfc | Pdgfc | 9.12E-14 | 0.359436442 | 0.251 | 0.121 | 2.07E-09 | Astrocytes |
| Aldoc | Aldoc | 1.03E-13 | 0.416228711 | 0.284 | 0.147 | 2.34E-09 | Astrocytes |
| Desi2 | Desi2 | 1.03E-13 | 0.415455618 | 0.565 | 0.394 | 2.35E-09 | Astrocytes |
| Raver2 | Raver2 | 1.09E-13 | 0.27691493 | 0.432 | 0.252 | 2.47E-09 | Astrocytes |
| Cbs | Cbs | 1.39E-13 | 0.356219553 | 0.275 | 0.138 | 3.16E-09 | Astrocytes |
| Fndc3b | Fndc3b | 1.45E-13 | 0.396701812 | 0.336 | 0.187 | 3.29E-09 | Astrocytes |
| Grk4 | Grk4 | 1.60E-13 | 0.453461142 | 0.259 | 0.132 | 3.64E-09 | Astrocytes |
| Prdx1 | Prdx1 | 1.65E-13 | 0.418486644 | 0.299 | 0.16 | 3.74E-09 | Astrocytes |
| Acot11 | Acot11 | 1.95E-13 | 0.423647353 | 0.292 | 0.154 | 4.43E-09 | Astrocytes |
| Gabbr1 | Gabbr1 | 2.01E-13 | 0.391912729 | 0.632 | 0.459 | 4.57E-09 | Astrocytes |
| Prdm5 | Prdm5 | 2.48E-13 | 0.376782695 | 0.292 | 0.155 | 5.63E-09 | Astrocytes |
| Cuedc1 | Cuedc1 | 2.63E-13 | 0.390343234 | 0.394 | 0.236 | 5.97E-09 | Astrocytes |
| Scrn1 | Scrn1 | 3.33E-13 | 0.374346286 | 0.313 | 0.17 | 7.57E-09 | Astrocytes |
| Msmo1 | Msmo1 | 3.40E-13 | 0.423285766 | 0.259 | 0.132 | 7.73E-09 | Astrocytes |
| Gm4221 | Gm4221 | 3.98E-13 | 0.42713429 | 0.257 | 0.129 | 9.03E-09 | Astrocytes |
| Ppp2r5a | Ppp2r5a | 5.23E-13 | 0.425554944 | 0.428 | 0.274 | 1.19E-08 | Astrocytes |
| Plxdc2 | Plxdc2 | 5.52E-13 | 0.403075328 | 0.317 | 0.176 | 1.25E-08 | Astrocytes |
| Gm48765 | Gm48765 | 5.57E-13 | 0.439449745 | 0.275 | 0.146 | 1.27E-08 | Astrocytes |
| Rasa3 | Rasa3 | 5.83E-13 | 0.401617087 | 0.289 | 0.156 | 1.32E-08 | Astrocytes |
| Nr3c1 | Nr3c1 | 6.08E-13 | 0.430166576 | 0.381 | 0.234 | 1.38E-08 | Astrocytes |
| Crtc3 | Crtc3 | 6.60E-13 | 0.348335378 | 0.554 | 0.383 | 1.50E-08 | Astrocytes |
| Atp1b2 | Atp1b2 | 6.61E-13 | 0.390077245 | 0.32 | 0.178 | 1.50E-08 | Astrocytes |
| Cyp2j9 | Cyp2j9 | 6.92E-13 | 0.411579913 | 0.259 | 0.133 | 1.57E-08 | Astrocytes |
| D130040H23Rik | D130040H23Rik | 7.03E-13 | 0.429454199 | 0.393 | 0.247 | 1.60E-08 | Astrocytes |
| Ttc23 | Ttc23 | 7.53E-13 | 0.393268264 | 0.272 | 0.143 | 1.71E-08 | Astrocytes |
| Naaladl2 | Naaladl2 | 8.37E-13 | 0.372705912 | 0.466 | 0.306 | 1.90E-08 | Astrocytes |
| Tef | Tef | 9.02E-13 | 0.367194226 | 0.513 | 0.342 | 2.05E-08 | Astrocytes |
| Sntb1 | Sntb1 | 9.70E-13 | 0.319088415 | 0.336 | 0.189 | 2.20E-08 | Astrocytes |
| Fut8 | Fut8 | 1.03E-12 | 0.430566202 | 0.484 | 0.33 | 2.34E-08 | Astrocytes |
| Myo18a | Myo18a | 1.05E-12 | 0.42103442 | 0.456 | 0.302 | 2.39E-08 | Astrocytes |
| Hivep2 | Hivep2 | 1.21E-12 | 0.330182723 | 0.643 | 0.463 | 2.75E-08 | Astrocytes |
| Phf21b | Phf21b | 1.28E-12 | 0.391824446 | 0.302 | 0.167 | 2.90E-08 | Astrocytes |
| Sptbn1 | Sptbn1 | 1.52E-12 | 0.346153067 | 0.704 | 0.551 | 3.45E-08 | Astrocytes |
| Dst | Dst | 1.72E-12 | 0.391921066 | 0.627 | 0.465 | 3.91E-08 | Astrocytes |
| Mfn1 | Mfn1 | 2.03E-12 | 0.363365801 | 0.385 | 0.232 | 4.61E-08 | Astrocytes |
| Yap1 | Yap1 | 2.45E-12 | 0.360570431 | 0.274 | 0.145 | 5.55E-08 | Astrocytes |
| Prrx1 | Prrx1 | 3.34E-12 | 0.32947104 | 0.413 | 0.253 | 7.60E-08 | Astrocytes |
| Acyp2 | Acyp2 | 3.43E-12 | 0.451152618 | 0.419 | 0.276 | 7.79E-08 | Astrocytes |
| Gpr37l1 | Gpr37l1 | 5.14E-12 | 0.401148836 | 0.295 | 0.166 | 1.17E-07 | Astrocytes |
| Sdc2 | Sdc2 | 5.74E-12 | 0.410574473 | 0.362 | 0.221 | 1.30E-07 | Astrocytes |
| Add1 | Add1 | 9.15E-12 | 0.419258737 | 0.48 | 0.337 | 2.08E-07 | Astrocytes |
| Mid1 | Mid1 | 9.35E-12 | 0.257929755 | 0.498 | 0.319 | 2.12E-07 | Astrocytes |
| Arfgef2 | Arfgef2 | 9.96E-12 | 0.391146305 | 0.303 | 0.175 | 2.26E-07 | Astrocytes |
| Camk2d | Camk2d | 1.04E-11 | 0.332748531 | 0.497 | 0.33 | 2.36E-07 | Astrocytes |
| Arhgap42 | Arhgap42 | 1.16E-11 | 0.355157752 | 0.287 | 0.159 | 2.64E-07 | Astrocytes |
| Eea1 | Eea1 | 1.17E-11 | 0.456739869 | 0.35 | 0.219 | 2.66E-07 | Astrocytes |
| Extl3 | Extl3 | 1.29E-11 | 0.456938834 | 0.392 | 0.257 | 2.94E-07 | Astrocytes |
| Pcdh10 | Pcdh10 | 1.30E-11 | 0.407382406 | 0.56 | 0.408 | 2.95E-07 | Astrocytes |
| Ahcyl1 | Ahcyl1 | 1.60E-11 | 0.366842442 | 0.535 | 0.383 | 3.64E-07 | Astrocytes |
| Fam49b | Fam49b | 1.60E-11 | 0.396536653 | 0.501 | 0.352 | 3.64E-07 | Astrocytes |
| Cnnm2 | Cnnm2 | 1.73E-11 | 0.357643818 | 0.321 | 0.187 | 3.93E-07 | Astrocytes |
| Kcnq3 | Kcnq3 | 1.99E-11 | 0.626016739 | 0.505 | 0.387 | 4.52E-07 | Astrocytes |
| Park2 | Park2 | 2.33E-11 | 0.298964456 | 0.742 | 0.571 | 5.30E-07 | Astrocytes |
| Prelid3a | Prelid3a | 2.36E-11 | 0.399773904 | 0.269 | 0.151 | 5.35E-07 | Astrocytes |
| Pced1b | Pced1b | 2.60E-11 | 0.468033322 | 0.313 | 0.188 | 5.91E-07 | Astrocytes |
| Snrk | Snrk | 2.60E-11 | 0.358750486 | 0.263 | 0.143 | 5.91E-07 | Astrocytes |
| Abca1 | Abca1 | 2.73E-11 | 0.322034255 | 0.538 | 0.381 | 6.20E-07 | Astrocytes |
| Nek7 | Nek7 | 2.75E-11 | 0.353795483 | 0.301 | 0.175 | 6.24E-07 | Astrocytes |
| Ostm1 | Ostm1 | 3.44E-11 | 0.403050549 | 0.308 | 0.183 | 7.81E-07 | Astrocytes |
| Dopey2 | Dopey2 | 3.59E-11 | 0.348120633 | 0.278 | 0.156 | 8.15E-07 | Astrocytes |
| Egfem1 | Egfem1 | 3.84E-11 | 0.508259082 | 0.376 | 0.252 | 8.72E-07 | Astrocytes |
| Sh3pxd2b | Sh3pxd2b | 5.22E-11 | 0.347051858 | 0.366 | 0.229 | 1.19E-06 | Astrocytes |
| Prkdc | Prkdc | 5.32E-11 | 0.391219416 | 0.302 | 0.178 | 1.21E-06 | Astrocytes |
| Tmcc3 | Tmcc3 | 5.88E-11 | 0.266626712 | 0.519 | 0.352 | 1.34E-06 | Astrocytes |
| Aak1 | Aak1 | 6.66E-11 | 0.363765666 | 0.596 | 0.445 | 1.51E-06 | Astrocytes |
| Esco1 | Esco1 | 7.25E-11 | 0.3550134 | 0.297 | 0.171 | 1.65E-06 | Astrocytes |
| Ccnd3 | Ccnd3 | 8.99E-11 | 0.301354071 | 0.361 | 0.224 | 2.04E-06 | Astrocytes |
| Shisa4 | Shisa4 | 9.17E-11 | 0.317359154 | 0.272 | 0.151 | 2.08E-06 | Astrocytes |
| Sgms1 | Sgms1 | 1.00E-10 | 0.371394569 | 0.308 | 0.186 | 2.28E-06 | Astrocytes |
| AC134414.1 | AC134414.1 | 1.13E-10 | 0.423692873 | 0.274 | 0.157 | 2.57E-06 | Astrocytes |
| Gpld1 | Gpld1 | 1.60E-10 | 0.251083398 | 0.349 | 0.204 | 3.64E-06 | Astrocytes |
| Shroom2 | Shroom2 | 1.66E-10 | 0.329956612 | 0.288 | 0.167 | 3.77E-06 | Astrocytes |
| Afg1l | Afg1l | 1.71E-10 | 0.344341674 | 0.308 | 0.182 | 3.89E-06 | Astrocytes |
| Agpat5 | Agpat5 | 2.10E-10 | 0.395331805 | 0.329 | 0.203 | 4.77E-06 | Astrocytes |
| Usp53 | Usp53 | 2.17E-10 | 0.342561679 | 0.284 | 0.164 | 4.92E-06 | Astrocytes |
| Esrrg | Esrrg | 2.19E-10 | 0.316147018 | 0.301 | 0.178 | 4.97E-06 | Astrocytes |
| Ncan | Ncan | 2.29E-10 | 0.373661389 | 0.299 | 0.18 | 5.21E-06 | Astrocytes |
| Tmem243 | Tmem243 | 2.98E-10 | 0.317447217 | 0.417 | 0.272 | 6.76E-06 | Astrocytes |
| Igdcc4 | Igdcc4 | 3.50E-10 | 0.319331105 | 0.296 | 0.173 | 7.96E-06 | Astrocytes |
| Akap7 | Akap7 | 3.59E-10 | 0.347314745 | 0.269 | 0.154 | 8.15E-06 | Astrocytes |
| Pnisr | Pnisr | 4.23E-10 | 0.259110529 | 0.798 | 0.695 | 9.60E-06 | Astrocytes |
| Cst3 | Cst3 | 4.47E-10 | 0.303850326 | 0.8 | 0.668 | 1.02E-05 | Astrocytes |
| Dennd4c | Dennd4c | 6.22E-10 | 0.385006935 | 0.411 | 0.284 | 1.41E-05 | Astrocytes |
| Galnt1 | Galnt1 | 8.66E-10 | 0.345542102 | 0.401 | 0.27 | 1.97E-05 | Astrocytes |
| Phyhipl | Phyhipl | 9.10E-10 | 0.370904449 | 0.477 | 0.339 | 2.07E-05 | Astrocytes |
| Nova1 | Nova1 | 1.01E-09 | 0.31980613 | 0.379 | 0.248 | 2.29E-05 | Astrocytes |
| Eif4g3 | Eif4g3 | 1.04E-09 | 0.354790109 | 0.608 | 0.48 | 2.37E-05 | Astrocytes |
| Erc1 | Erc1 | 1.35E-09 | 0.322104105 | 0.497 | 0.357 | 3.06E-05 | Astrocytes |
| Vps13d | Vps13d | 1.38E-09 | 0.357327929 | 0.441 | 0.317 | 3.14E-05 | Astrocytes |
| Fmnl2 | Fmnl2 | 1.59E-09 | 0.309569 | 0.71 | 0.571 | 3.62E-05 | Astrocytes |
| Tsc22d4 | Tsc22d4 | 1.73E-09 | 0.30152433 | 0.324 | 0.201 | 3.93E-05 | Astrocytes |
| Dok5 | Dok5 | 2.05E-09 | 0.265525019 | 0.264 | 0.149 | 4.65E-05 | Astrocytes |
| Enah | Enah | 2.07E-09 | 0.303807174 | 0.791 | 0.666 | 4.71E-05 | Astrocytes |
| Plxnb1 | Plxnb1 | 2.22E-09 | 0.330543515 | 0.253 | 0.146 | 5.04E-05 | Astrocytes |
| Iqsec1 | Iqsec1 | 2.31E-09 | 0.307577961 | 0.336 | 0.213 | 5.24E-05 | Astrocytes |
| Wls | Wls | 2.43E-09 | 0.368387503 | 0.323 | 0.201 | 5.52E-05 | Astrocytes |
| Aldh7a1 | Aldh7a1 | 2.76E-09 | 0.309749011 | 0.277 | 0.167 | 6.27E-05 | Astrocytes |
| Asph | Asph | 2.79E-09 | 0.341700097 | 0.341 | 0.219 | 6.34E-05 | Astrocytes |
| Cntfr | Cntfr | 2.90E-09 | 0.333888502 | 0.349 | 0.226 | 6.58E-05 | Astrocytes |
| Atl2 | Atl2 | 3.06E-09 | 0.295003887 | 0.394 | 0.261 | 6.95E-05 | Astrocytes |
| Gprc5b | Gprc5b | 4.39E-09 | 0.279842802 | 0.25 | 0.144 | 9.96E-05 | Astrocytes |
| Gm28175 | Gm28175 | 4.91E-09 | 0.379431256 | 0.271 | 0.164 | 0.00011141 | Astrocytes |
| Gm48678 | Gm48678 | 5.29E-09 | 0.304667149 | 0.277 | 0.166 | 0.000120134 | Astrocytes |
| Plekhm2 | Plekhm2 | 5.52E-09 | 0.361323729 | 0.302 | 0.189 | 0.000125406 | Astrocytes |
| Klhl32 | Klhl32 | 5.91E-09 | 0.382698315 | 0.337 | 0.225 | 0.000134304 | Astrocytes |
| Zfhx3 | Zfhx3 | 6.28E-09 | 0.327911367 | 0.55 | 0.424 | 0.000142645 | Astrocytes |
| Tmem47 | Tmem47 | 7.19E-09 | 0.34778783 | 0.438 | 0.305 | 0.000163232 | Astrocytes |
| Gm26804 | Gm26804 | 7.46E-09 | 0.30703638 | 0.622 | 0.489 | 0.000169478 | Astrocytes |
| Abi1 | Abi1 | 7.91E-09 | 0.342286997 | 0.546 | 0.429 | 0.000179663 | Astrocytes |
| Pag1 | Pag1 | 8.47E-09 | 0.396741785 | 0.37 | 0.261 | 0.000192428 | Astrocytes |
| Arnt2 | Arnt2 | 8.88E-09 | 0.313469606 | 0.55 | 0.424 | 0.000201786 | Astrocytes |
| Irf2 | Irf2 | 9.84E-09 | 0.399618835 | 0.306 | 0.199 | 0.000223552 | Astrocytes |
| Tnrc6a | Tnrc6a | 1.23E-08 | 0.285436559 | 0.32 | 0.206 | 0.000279252 | Astrocytes |
| Cipc | Cipc | 1.25E-08 | 0.305996743 | 0.283 | 0.175 | 0.000283727 | Astrocytes |
| Ldhb | Ldhb | 1.41E-08 | 0.307522043 | 0.427 | 0.298 | 0.000320708 | Astrocytes |
| Rhoq | Rhoq | 1.63E-08 | 0.286610596 | 0.308 | 0.194 | 0.000370953 | Astrocytes |
| Lrrc58 | Lrrc58 | 1.95E-08 | 0.298131683 | 0.355 | 0.237 | 0.000442098 | Astrocytes |
| St6galnac5 | St6galnac5 | 2.64E-08 | 0.404074772 | 0.369 | 0.256 | 0.00059892 | Astrocytes |
| Suclg1 | Suclg1 | 3.01E-08 | 0.256743622 | 0.25 | 0.147 | 0.000683297 | Astrocytes |
| Ptpra | Ptpra | 3.67E-08 | 0.305323835 | 0.541 | 0.422 | 0.000833363 | Astrocytes |
| Itsn2 | Itsn2 | 4.07E-08 | 0.306768157 | 0.395 | 0.278 | 0.000923424 | Astrocytes |
| Acaca | Acaca | 4.26E-08 | 0.289618821 | 0.595 | 0.457 | 0.000968241 | Astrocytes |
| Elovl5 | Elovl5 | 4.53E-08 | 0.327012775 | 0.251 | 0.155 | 0.001029474 | Astrocytes |
| Atxn2 | Atxn2 | 4.76E-08 | 0.293005865 | 0.507 | 0.38 | 0.00108166 | Astrocytes |
| Mt1 | Mt1 | 5.06E-08 | 0.283105969 | 0.283 | 0.175 | 0.001149411 | Astrocytes |
| Tbcel | Tbcel | 7.66E-08 | 0.286111548 | 0.317 | 0.21 | 0.001740002 | Astrocytes |
| Aco2 | Aco2 | 1.19E-07 | 0.255276331 | 0.431 | 0.306 | 0.002712756 | Astrocytes |
| Tom1l1 | Tom1l1 | 1.32E-07 | 0.272163695 | 0.284 | 0.182 | 0.002989984 | Astrocytes |
| Med12l | Med12l | 1.35E-07 | 0.31737443 | 0.45 | 0.336 | 0.003071801 | Astrocytes |
| Jak1 | Jak1 | 1.65E-07 | 0.259450867 | 0.329 | 0.219 | 0.003756742 | Astrocytes |
| Mtor | Mtor | 1.97E-07 | 0.300168086 | 0.288 | 0.194 | 0.004468644 | Astrocytes |
| Syn2 | Syn2 | 2.05E-07 | 0.269402131 | 0.473 | 0.348 | 0.004649491 | Astrocytes |
| Crim1 | Crim1 | 2.13E-07 | 0.269118853 | 0.319 | 0.214 | 0.004836935 | Astrocytes |
| Rnf144a | Rnf144a | 2.22E-07 | 0.263110845 | 0.306 | 0.202 | 0.005037001 | Astrocytes |
| Kif13a | Kif13a | 2.24E-07 | 0.355022947 | 0.302 | 0.207 | 0.005084169 | Astrocytes |
| Cdc42bpa | Cdc42bpa | 2.36E-07 | 0.255759342 | 0.673 | 0.558 | 0.005351535 | Astrocytes |
| Kidins220 | Kidins220 | 3.15E-07 | 0.27239171 | 0.618 | 0.51 | 0.007145389 | Astrocytes |
| Camk2n1 | Camk2n1 | 3.91E-07 | 0.269179639 | 0.403 | 0.289 | 0.008875277 | Astrocytes |
| Adamts6 | Adamts6 | 4.07E-07 | 0.265398954 | 0.275 | 0.18 | 0.009234329 | Astrocytes |
| Cap2 | Cap2 | 4.33E-07 | 0.256621609 | 0.368 | 0.254 | 0.009829565 | Astrocytes |
| Cdh11 | Cdh11 | 5.03E-07 | 0.28883337 | 0.393 | 0.279 | 0.011423142 | Astrocytes |
| Nr1d2 | Nr1d2 | 7.56E-07 | 0.296592218 | 0.378 | 0.273 | 0.017167145 | Astrocytes |
| Tiparp | Tiparp | 7.75E-07 | 0.300130988 | 0.26 | 0.171 | 0.017607486 | Astrocytes |
| Acap2 | Acap2 | 9.94E-07 | 0.273574992 | 0.51 | 0.386 | 0.022578847 | Astrocytes |
| Arhgap23 | Arhgap23 | 1.10E-06 | 0.274351357 | 0.284 | 0.19 | 0.024950147 | Astrocytes |
| Stim1 | Stim1 | 1.17E-06 | 0.278532498 | 0.324 | 0.223 | 0.02657913 | Astrocytes |
| Larp1 | Larp1 | 1.32E-06 | 0.285482161 | 0.344 | 0.245 | 0.029887357 | Astrocytes |
| Rbms3 | Rbms3 | 1.41E-06 | 0.361180574 | 0.389 | 0.29 | 0.032133606 | Astrocytes |
| Dnm2 | Dnm2 | 1.57E-06 | 0.268700526 | 0.343 | 0.243 | 0.035759253 | Astrocytes |
| Gpr158 | Gpr158 | 1.76E-06 | 0.277869887 | 0.422 | 0.317 | 0.04007555 | Astrocytes |
| Pou3f3 | Pou3f3 | 2.01E-06 | 0.332818557 | 0.33 | 0.24 | 0.045622366 | Astrocytes |
| Trak1 | Trak1 | 2.21E-06 | 0.27928634 | 0.441 | 0.334 | 0.05014048 | Astrocytes |
| Lamp2 | Lamp2 | 2.82E-06 | 0.28183085 | 0.338 | 0.239 | 0.064014992 | Astrocytes |
| 7-Sep | 7-Sep | 3.38E-06 | 0.267160146 | 0.46 | 0.345 | 0.076664536 | Astrocytes |
| Apba2 | Apba2 | 3.51E-06 | 0.250520131 | 0.568 | 0.456 | 0.079798806 | Astrocytes |
| Ogdh | Ogdh | 4.23E-06 | 0.273907028 | 0.326 | 0.232 | 0.096173411 | Astrocytes |
| Etfa | Etfa | 5.04E-06 | 0.264404752 | 0.25 | 0.168 | 0.114555545 | Astrocytes |
| Tmem135 | Tmem135 | 5.46E-06 | 0.255094912 | 0.411 | 0.312 | 0.124034933 | Astrocytes |
| Trappc9 | Trappc9 | 5.74E-06 | 0.254378634 | 0.428 | 0.324 | 0.130434152 | Astrocytes |
| Cyb5b | Cyb5b | 6.96E-06 | 0.256978525 | 0.259 | 0.178 | 0.157977632 | Astrocytes |
| Mib1 | Mib1 | 7.17E-06 | 0.25013457 | 0.465 | 0.362 | 0.162851399 | Astrocytes |
| Pigk | Pigk | 2.73E-05 | 0.25570231 | 0.278 | 0.199 | 0.619908145 | Astrocytes |
| Rasgrf1 | Rasgrf1 | 0.000497509 | 0.252040384 | 0.256 | 0.192 | 1 | Astrocytes |
| Gm38505 | Gm38505 | 0 | 3.822055259 | 0.912 | 0.07 | 0 | Neuroblasts |
| Dlx6os1 | Dlx6os1 | 7.14E-270 | 3.365206338 | 0.879 | 0.095 | 1.62E-265 | Neuroblasts |
| Adarb2 | Adarb2 | 1.83E-263 | 5.089246145 | 0.895 | 0.157 | 4.17E-259 | Neuroblasts |
| Nav3 | Nav3 | 3.65E-228 | 3.413074798 | 0.953 | 0.349 | 8.30E-224 | Neuroblasts |
| Nrxn3 | Nrxn3 | 6.76E-219 | 3.450133039 | 1 | 0.904 | 1.54E-214 | Neuroblasts |
| Cacna1c | Cacna1c | 1.46E-218 | 3.302537238 | 0.872 | 0.212 | 3.32E-214 | Neuroblasts |
| Dcx | Dcx | 4.99E-217 | 2.514075668 | 0.733 | 0.076 | 1.13E-212 | Neuroblasts |
| Zfp704 | Zfp704 | 3.89E-208 | 2.988354526 | 0.821 | 0.17 | 8.83E-204 | Neuroblasts |
| Enox1 | Enox1 | 2.50E-203 | 2.857170752 | 0.947 | 0.399 | 5.69E-199 | Neuroblasts |
| Maml3 | Maml3 | 6.46E-200 | 2.775960462 | 0.885 | 0.232 | 1.47E-195 | Neuroblasts |
| Celf4 | Celf4 | 4.35E-198 | 2.61161566 | 0.877 | 0.245 | 9.89E-194 | Neuroblasts |
| Anks1b | Anks1b | 1.74E-192 | 2.578980478 | 0.961 | 0.594 | 3.96E-188 | Neuroblasts |
| Cadps | Cadps | 5.60E-188 | 2.344037055 | 0.866 | 0.236 | 1.27E-183 | Neuroblasts |
| Mpped2 | Mpped2 | 2.96E-184 | 2.942633791 | 0.914 | 0.359 | 6.72E-180 | Neuroblasts |
| Lrrc7 | Lrrc7 | 1.21E-183 | 2.759075796 | 0.93 | 0.506 | 2.74E-179 | Neuroblasts |
| Bcl11a | Bcl11a | 1.12E-177 | 2.352795513 | 0.805 | 0.18 | 2.53E-173 | Neuroblasts |
| Erbb4 | Erbb4 | 4.18E-177 | 3.295707718 | 0.957 | 0.658 | 9.49E-173 | Neuroblasts |
| Meis2 | Meis2 | 2.01E-173 | 2.011503777 | 0.973 | 0.89 | 4.56E-169 | Neuroblasts |
| Auts2 | Auts2 | 7.46E-173 | 1.467815642 | 0.996 | 0.985 | 1.70E-168 | Neuroblasts |
| Dscaml1 | Dscaml1 | 5.44E-169 | 2.062069737 | 0.747 | 0.125 | 1.24E-164 | Neuroblasts |
| Pbx3 | Pbx3 | 4.79E-166 | 3.719125489 | 0.872 | 0.411 | 1.09E-161 | Neuroblasts |
| Robo2 | Robo2 | 6.08E-166 | 3.103025581 | 0.912 | 0.471 | 1.38E-161 | Neuroblasts |
| Sdk2 | Sdk2 | 1.72E-165 | 2.502189561 | 0.73 | 0.155 | 3.90E-161 | Neuroblasts |
| Pak7 | Pak7 | 1.48E-160 | 2.208028139 | 0.648 | 0.099 | 3.36E-156 | Neuroblasts |
| Myt1l | Myt1l | 1.39E-157 | 2.19742948 | 0.846 | 0.31 | 3.16E-153 | Neuroblasts |
| 1-Mar | 1-Mar | 1.09E-153 | 2.565480213 | 0.776 | 0.222 | 2.47E-149 | Neuroblasts |
| Nol4 | Nol4 | 4.76E-153 | 2.048411621 | 0.967 | 0.587 | 1.08E-148 | Neuroblasts |
| St6galnac3 | St6galnac3 | 1.49E-146 | 2.209812966 | 0.652 | 0.119 | 3.38E-142 | Neuroblasts |
| Runx1t1 | Runx1t1 | 1.81E-146 | 2.546476042 | 0.761 | 0.229 | 4.10E-142 | Neuroblasts |
| Shtn1 | Shtn1 | 3.72E-146 | 2.312710346 | 0.654 | 0.118 | 8.45E-142 | Neuroblasts |
| Srrm4 | Srrm4 | 5.89E-145 | 2.032036497 | 0.601 | 0.085 | 1.34E-140 | Neuroblasts |
| Asxl3 | Asxl3 | 1.63E-141 | 1.804647372 | 0.484 | 0.037 | 3.71E-137 | Neuroblasts |
| Pde4dip | Pde4dip | 5.55E-141 | 2.148826695 | 0.739 | 0.211 | 1.26E-136 | Neuroblasts |
| Ppfia2 | Ppfia2 | 7.20E-141 | 2.285960946 | 0.743 | 0.214 | 1.63E-136 | Neuroblasts |
| Fam155a | Fam155a | 1.37E-136 | 2.674367874 | 0.77 | 0.27 | 3.10E-132 | Neuroblasts |
| Sorbs2 | Sorbs2 | 1.31E-135 | 2.124846911 | 0.817 | 0.326 | 2.98E-131 | Neuroblasts |
| Igfbpl1 | Igfbpl1 | 1.15E-132 | 1.800746642 | 0.453 | 0.032 | 2.61E-128 | Neuroblasts |
| Msra | Msra | 3.21E-127 | 2.166830382 | 0.644 | 0.148 | 7.28E-123 | Neuroblasts |
| Gad2 | Gad2 | 4.41E-124 | 1.816022459 | 0.813 | 0.319 | 1.00E-119 | Neuroblasts |
| Gng2 | Gng2 | 3.18E-122 | 1.792489826 | 0.558 | 0.093 | 7.22E-118 | Neuroblasts |
| Ctnna2 | Ctnna2 | 2.38E-121 | 1.482513065 | 0.988 | 0.88 | 5.41E-117 | Neuroblasts |
| Tmem131l | Tmem131l | 7.97E-121 | 1.798753331 | 0.675 | 0.169 | 1.81E-116 | Neuroblasts |
| Pbx1 | Pbx1 | 7.31E-117 | 1.192854797 | 0.986 | 0.973 | 1.66E-112 | Neuroblasts |
| Pde4d | Pde4d | 9.53E-115 | 1.705118882 | 0.897 | 0.532 | 2.16E-110 | Neuroblasts |
| Slc8a1 | Slc8a1 | 1.88E-110 | 1.988894992 | 0.644 | 0.17 | 4.28E-106 | Neuroblasts |
| Map2 | Map2 | 3.36E-110 | 1.314911815 | 0.947 | 0.793 | 7.62E-106 | Neuroblasts |
| Grik3 | Grik3 | 1.05E-108 | 1.956453822 | 0.451 | 0.058 | 2.38E-104 | Neuroblasts |
| C79798 | C79798 | 1.54E-108 | 1.689001867 | 0.393 | 0.032 | 3.50E-104 | Neuroblasts |
| Grip1 | Grip1 | 1.07E-107 | 2.128126078 | 0.823 | 0.432 | 2.43E-103 | Neuroblasts |
| Stmn2 | Stmn2 | 5.14E-107 | 1.865832575 | 0.529 | 0.099 | 1.17E-102 | Neuroblasts |
| Gad1 | Gad1 | 8.21E-106 | 1.746676035 | 0.677 | 0.214 | 1.86E-101 | Neuroblasts |
| Plxna4 | Plxna4 | 5.30E-105 | 2.824529006 | 0.65 | 0.218 | 1.20E-100 | Neuroblasts |
| Map1b | Map1b | 5.62E-105 | 1.639122771 | 0.805 | 0.359 | 1.28E-100 | Neuroblasts |
| Snrpn | Snrpn | 3.68E-103 | 1.728190356 | 0.453 | 0.062 | 8.35E-99 | Neuroblasts |
| Nav1 | Nav1 | 5.65E-103 | 1.648195067 | 0.665 | 0.2 | 1.28E-98 | Neuroblasts |
| Nmnat2 | Nmnat2 | 2.32E-102 | 1.707464255 | 0.539 | 0.111 | 5.27E-98 | Neuroblasts |
| Plcl1 | Plcl1 | 2.66E-101 | 1.922920229 | 0.854 | 0.493 | 6.04E-97 | Neuroblasts |
| Kcnh8 | Kcnh8 | 2.34E-99 | 1.501105466 | 0.358 | 0.027 | 5.31E-95 | Neuroblasts |
| Brinp2 | Brinp2 | 1.97E-97 | 1.718203459 | 0.502 | 0.095 | 4.48E-93 | Neuroblasts |
| Dpysl5 | Dpysl5 | 4.27E-97 | 1.521186495 | 0.42 | 0.053 | 9.71E-93 | Neuroblasts |
| Tenm2 | Tenm2 | 1.60E-95 | 1.96105131 | 0.842 | 0.586 | 3.63E-91 | Neuroblasts |
| Astn1 | Astn1 | 1.79E-94 | 1.423566187 | 0.874 | 0.558 | 4.06E-90 | Neuroblasts |
| Gm26936 | Gm26936 | 8.99E-94 | 1.677417717 | 0.521 | 0.114 | 2.04E-89 | Neuroblasts |
| Dpysl3 | Dpysl3 | 1.76E-93 | 1.602348231 | 0.514 | 0.108 | 4.00E-89 | Neuroblasts |
| St8sia2 | St8sia2 | 2.65E-93 | 1.456422711 | 0.364 | 0.036 | 6.01E-89 | Neuroblasts |
| Sox4 | Sox4 | 2.90E-93 | 1.604984386 | 0.444 | 0.07 | 6.60E-89 | Neuroblasts |
| Tenm4 | Tenm4 | 8.63E-93 | 2.113354005 | 0.722 | 0.34 | 1.96E-88 | Neuroblasts |
| Frmd5 | Frmd5 | 1.14E-92 | 1.803838073 | 0.597 | 0.174 | 2.58E-88 | Neuroblasts |
| C530008M17Rik | C530008M17Rik | 1.28E-92 | 1.626541159 | 0.667 | 0.221 | 2.91E-88 | Neuroblasts |
| Gm16351 | Gm16351 | 1.51E-91 | 1.326886094 | 0.278 | 0.009 | 3.44E-87 | Neuroblasts |
| Xkr4 | Xkr4 | 4.97E-91 | 1.904344607 | 0.671 | 0.253 | 1.13E-86 | Neuroblasts |
| Gm20754 | Gm20754 | 1.16E-89 | 2.397660362 | 0.436 | 0.078 | 2.64E-85 | Neuroblasts |
| B020031H02Rik | B020031H02Rik | 1.17E-89 | 1.588413098 | 0.286 | 0.013 | 2.67E-85 | Neuroblasts |
| Tiam2 | Tiam2 | 1.45E-88 | 1.955652755 | 0.726 | 0.336 | 3.30E-84 | Neuroblasts |
| Slco5a1 | Slco5a1 | 2.72E-88 | 1.306041784 | 0.296 | 0.017 | 6.17E-84 | Neuroblasts |
| Ppm1l | Ppm1l | 1.67E-87 | 1.657610932 | 0.556 | 0.147 | 3.80E-83 | Neuroblasts |
| Plxna2 | Plxna2 | 3.75E-86 | 1.63193124 | 0.621 | 0.208 | 8.52E-82 | Neuroblasts |
| Trim2 | Trim2 | 1.71E-85 | 1.473678076 | 0.807 | 0.43 | 3.88E-81 | Neuroblasts |
| Zfp618 | Zfp618 | 1.26E-84 | 1.328563455 | 0.305 | 0.023 | 2.86E-80 | Neuroblasts |
| Foxp2 | Foxp2 | 4.20E-83 | 2.615082504 | 0.663 | 0.294 | 9.53E-79 | Neuroblasts |
| Ank3 | Ank3 | 7.39E-82 | 1.77353474 | 0.763 | 0.441 | 1.68E-77 | Neuroblasts |
| Frmd4b | Frmd4b | 7.57E-82 | 1.658005506 | 0.638 | 0.234 | 1.72E-77 | Neuroblasts |
| Epb41l3 | Epb41l3 | 4.61E-81 | 1.640750531 | 0.488 | 0.118 | 1.05E-76 | Neuroblasts |
| Meg3 | Meg3 | 9.64E-80 | 1.094975949 | 0.957 | 0.897 | 2.19E-75 | Neuroblasts |
| Myt1 | Myt1 | 2.52E-79 | 1.325800628 | 0.381 | 0.057 | 5.72E-75 | Neuroblasts |
| Kcnb2 | Kcnb2 | 3.60E-79 | 2.662706728 | 0.479 | 0.125 | 8.18E-75 | Neuroblasts |
| Fam196b | Fam196b | 4.38E-79 | 1.285874085 | 0.278 | 0.018 | 9.94E-75 | Neuroblasts |
| Elmo1 | Elmo1 | 3.43E-77 | 1.601478278 | 0.574 | 0.192 | 7.80E-73 | Neuroblasts |
| Dip2c | Dip2c | 1.91E-76 | 1.241573643 | 0.86 | 0.608 | 4.34E-72 | Neuroblasts |
| Svop | Svop | 3.70E-76 | 1.323319217 | 0.379 | 0.062 | 8.40E-72 | Neuroblasts |
| Mtss1 | Mtss1 | 5.78E-76 | 1.52974117 | 0.549 | 0.17 | 1.31E-71 | Neuroblasts |
| Celf2 | Celf2 | 1.07E-75 | 0.943568695 | 0.992 | 0.976 | 2.43E-71 | Neuroblasts |
| Slain1 | Slain1 | 2.37E-75 | 1.448809195 | 0.444 | 0.097 | 5.39E-71 | Neuroblasts |
| Sntg1 | Sntg1 | 3.48E-75 | 1.768535535 | 0.628 | 0.262 | 7.90E-71 | Neuroblasts |
| Dclk2 | Dclk2 | 6.02E-75 | 1.502061761 | 0.739 | 0.365 | 1.37E-70 | Neuroblasts |
| Kcnh7 | Kcnh7 | 9.14E-73 | 1.678943248 | 0.628 | 0.242 | 2.08E-68 | Neuroblasts |
| Ppp1r12b | Ppp1r12b | 1.87E-72 | 1.464022224 | 0.714 | 0.381 | 4.24E-68 | Neuroblasts |
| Aff3 | Aff3 | 1.94E-72 | 1.674536827 | 0.656 | 0.285 | 4.42E-68 | Neuroblasts |
| Tmem2 | Tmem2 | 7.15E-72 | 1.42693616 | 0.455 | 0.107 | 1.62E-67 | Neuroblasts |
| Tshz1 | Tshz1 | 2.08E-71 | 1.737255789 | 0.529 | 0.17 | 4.71E-67 | Neuroblasts |
| Ssh2 | Ssh2 | 3.89E-71 | 1.247782083 | 0.786 | 0.419 | 8.83E-67 | Neuroblasts |
| Dscam | Dscam | 1.32E-70 | 2.060805396 | 0.393 | 0.08 | 3.00E-66 | Neuroblasts |
| Vcan | Vcan | 1.05E-69 | 1.784952707 | 0.5 | 0.152 | 2.39E-65 | Neuroblasts |
| Nfib | Nfib | 1.30E-69 | 1.137952667 | 0.951 | 0.916 | 2.95E-65 | Neuroblasts |
| St8sia4 | St8sia4 | 3.00E-69 | 1.213197261 | 0.28 | 0.028 | 6.82E-65 | Neuroblasts |
| Dlx1 | Dlx1 | 4.01E-69 | 1.194065018 | 0.362 | 0.061 | 9.11E-65 | Neuroblasts |
| Nlk | Nlk | 7.77E-69 | 1.626773661 | 0.741 | 0.42 | 1.76E-64 | Neuroblasts |
| Slit1 | Slit1 | 6.12E-68 | 1.245540855 | 0.368 | 0.064 | 1.39E-63 | Neuroblasts |
| Rims1 | Rims1 | 9.87E-67 | 1.734874024 | 0.599 | 0.251 | 2.24E-62 | Neuroblasts |
| 5730522E02Rik | 5730522E02Rik | 1.68E-64 | 1.68260957 | 0.597 | 0.243 | 3.81E-60 | Neuroblasts |
| Kcnip1 | Kcnip1 | 2.31E-64 | 1.507110717 | 0.307 | 0.045 | 5.26E-60 | Neuroblasts |
| Ptprs | Ptprs | 2.82E-64 | 1.273210518 | 0.716 | 0.385 | 6.41E-60 | Neuroblasts |
| Gm6994 | Gm6994 | 4.40E-64 | 1.251261884 | 0.288 | 0.037 | 1.00E-59 | Neuroblasts |
| Edil3 | Edil3 | 1.16E-63 | 1.555488213 | 0.541 | 0.2 | 2.64E-59 | Neuroblasts |
| 3-Mar | 3-Mar | 1.51E-63 | 1.647075722 | 0.529 | 0.186 | 3.42E-59 | Neuroblasts |
| Cpne4 | Cpne4 | 2.13E-63 | 2.333338163 | 0.253 | 0.026 | 4.85E-59 | Neuroblasts |
| Chn2 | Chn2 | 6.60E-63 | 1.305821366 | 0.315 | 0.049 | 1.50E-58 | Neuroblasts |
| Il1rapl1 | Il1rapl1 | 7.77E-63 | 1.563800272 | 0.926 | 0.843 | 1.77E-58 | Neuroblasts |
| Sema5a | Sema5a | 2.46E-62 | 1.529390152 | 0.34 | 0.064 | 5.59E-58 | Neuroblasts |
| Basp1 | Basp1 | 4.59E-61 | 1.2923845 | 0.605 | 0.254 | 1.04E-56 | Neuroblasts |
| Sp9 | Sp9 | 9.69E-61 | 1.142572946 | 0.323 | 0.056 | 2.20E-56 | Neuroblasts |
| Pak3 | Pak3 | 1.09E-60 | 1.073349528 | 0.605 | 0.231 | 2.47E-56 | Neuroblasts |
| D430041D05Rik | D430041D05Rik | 1.21E-60 | 1.36421739 | 0.469 | 0.142 | 2.75E-56 | Neuroblasts |
| Nedd4l | Nedd4l | 4.38E-60 | 1.151759011 | 0.854 | 0.652 | 9.94E-56 | Neuroblasts |
| Rnf165 | Rnf165 | 5.51E-60 | 1.147016377 | 0.335 | 0.061 | 1.25E-55 | Neuroblasts |
| Synpr | Synpr | 7.26E-60 | 1.936352917 | 0.481 | 0.165 | 1.65E-55 | Neuroblasts |
| Usp29 | Usp29 | 1.35E-59 | 1.454254221 | 0.447 | 0.13 | 3.08E-55 | Neuroblasts |
| Kcnc2 | Kcnc2 | 5.91E-59 | 1.95391952 | 0.366 | 0.085 | 1.34E-54 | Neuroblasts |
| Pcdh9 | Pcdh9 | 1.08E-58 | 1.062436822 | 0.988 | 0.988 | 2.46E-54 | Neuroblasts |
| Cacnb4 | Cacnb4 | 1.58E-58 | 1.402158465 | 0.593 | 0.261 | 3.58E-54 | Neuroblasts |
| Nbea | Nbea | 1.61E-58 | 1.329248667 | 0.846 | 0.684 | 3.66E-54 | Neuroblasts |
| Elavl4 | Elavl4 | 1.80E-58 | 1.301947329 | 0.424 | 0.113 | 4.10E-54 | Neuroblasts |
| Shb | Shb | 5.53E-58 | 1.066206056 | 0.294 | 0.046 | 1.26E-53 | Neuroblasts |
| Elavl2 | Elavl2 | 6.52E-57 | 1.320431503 | 0.444 | 0.133 | 1.48E-52 | Neuroblasts |
| Ccdc88a | Ccdc88a | 1.25E-56 | 1.039003267 | 0.907 | 0.758 | 2.84E-52 | Neuroblasts |
| Fnbp1l | Fnbp1l | 1.27E-56 | 1.15813346 | 0.588 | 0.245 | 2.89E-52 | Neuroblasts |
| Nrep | Nrep | 8.77E-56 | 1.047510851 | 0.296 | 0.05 | 1.99E-51 | Neuroblasts |
| Flrt2 | Flrt2 | 1.34E-55 | 1.928069489 | 0.523 | 0.211 | 3.04E-51 | Neuroblasts |
| Khdrbs3 | Khdrbs3 | 2.20E-55 | 1.541301175 | 0.5 | 0.19 | 4.99E-51 | Neuroblasts |
| Cald1 | Cald1 | 8.09E-55 | 1.192724258 | 0.29 | 0.05 | 1.84E-50 | Neuroblasts |
| Dchs2 | Dchs2 | 1.18E-54 | 1.295829863 | 0.27 | 0.04 | 2.69E-50 | Neuroblasts |
| Etv1 | Etv1 | 1.33E-54 | 1.458607666 | 0.453 | 0.148 | 3.03E-50 | Neuroblasts |
| Cers6 | Cers6 | 1.63E-54 | 1.263336462 | 0.379 | 0.095 | 3.70E-50 | Neuroblasts |
| Pcbp3 | Pcbp3 | 6.67E-54 | 1.37929215 | 0.416 | 0.125 | 1.52E-49 | Neuroblasts |
| Tmeff1 | Tmeff1 | 8.88E-54 | 1.235086005 | 0.447 | 0.143 | 2.02E-49 | Neuroblasts |
| Mob3b | Mob3b | 2.78E-53 | 1.38269952 | 0.428 | 0.128 | 6.31E-49 | Neuroblasts |
| Mgat5b | Mgat5b | 6.08E-53 | 0.949296447 | 0.259 | 0.037 | 1.38E-48 | Neuroblasts |
| Dlx1as | Dlx1as | 7.35E-53 | 1.160275103 | 0.331 | 0.07 | 1.67E-48 | Neuroblasts |
| Akap6 | Akap6 | 2.30E-52 | 0.906614354 | 0.899 | 0.75 | 5.23E-48 | Neuroblasts |
| Evl | Evl | 2.88E-52 | 1.185013023 | 0.527 | 0.207 | 6.55E-48 | Neuroblasts |
| Gabrb3 | Gabrb3 | 1.32E-51 | 1.240518172 | 0.702 | 0.435 | 3.00E-47 | Neuroblasts |
| Tmem178b | Tmem178b | 3.29E-51 | 1.249386051 | 0.71 | 0.433 | 7.47E-47 | Neuroblasts |
| Dapk1 | Dapk1 | 4.72E-51 | 1.133022659 | 0.586 | 0.261 | 1.07E-46 | Neuroblasts |
| Grm8 | Grm8 | 6.43E-51 | 2.026545746 | 0.317 | 0.07 | 1.46E-46 | Neuroblasts |
| Ccser1 | Ccser1 | 4.33E-50 | 1.839176806 | 0.71 | 0.494 | 9.84E-46 | Neuroblasts |
| Zeb2 | Zeb2 | 5.14E-50 | 1.134041089 | 0.831 | 0.687 | 1.17E-45 | Neuroblasts |
| Rab3c | Rab3c | 8.08E-50 | 1.20984953 | 0.494 | 0.188 | 1.84E-45 | Neuroblasts |
| Ncam1 | Ncam1 | 9.86E-50 | 0.77419944 | 0.936 | 0.832 | 2.24E-45 | Neuroblasts |
| Unc79 | Unc79 | 1.39E-49 | 1.082066906 | 0.648 | 0.338 | 3.15E-45 | Neuroblasts |
| Fam78b | Fam78b | 1.81E-49 | 1.056827573 | 0.265 | 0.045 | 4.10E-45 | Neuroblasts |
| Mir124a-1hg | Mir124a-1hg | 3.04E-49 | 1.072214272 | 0.329 | 0.076 | 6.92E-45 | Neuroblasts |
| Ccnd2 | Ccnd2 | 4.58E-49 | 1.402099562 | 0.494 | 0.19 | 1.04E-44 | Neuroblasts |
| Sox11 | Sox11 | 7.92E-49 | 1.211711593 | 0.475 | 0.176 | 1.80E-44 | Neuroblasts |
| Kat6b | Kat6b | 1.92E-48 | 1.087285751 | 0.765 | 0.544 | 4.35E-44 | Neuroblasts |
| A430106G13Rik | A430106G13Rik | 2.45E-48 | 1.031472699 | 0.251 | 0.04 | 5.58E-44 | Neuroblasts |
| Mllt3 | Mllt3 | 6.58E-48 | 1.169830569 | 0.66 | 0.376 | 1.49E-43 | Neuroblasts |
| Syn3 | Syn3 | 1.58E-47 | 1.552368466 | 0.471 | 0.193 | 3.58E-43 | Neuroblasts |
| Tox3 | Tox3 | 1.11E-46 | 1.451127818 | 0.564 | 0.264 | 2.52E-42 | Neuroblasts |
| Rtn4 | Rtn4 | 1.19E-46 | 0.882220644 | 0.852 | 0.613 | 2.71E-42 | Neuroblasts |
| Smoc1 | Smoc1 | 5.54E-46 | 1.164952474 | 0.284 | 0.059 | 1.26E-41 | Neuroblasts |
| Ptpro | Ptpro | 9.23E-46 | 1.292755017 | 0.253 | 0.046 | 2.10E-41 | Neuroblasts |
| Igf1r | Igf1r | 1.72E-45 | 0.952220995 | 0.831 | 0.633 | 3.90E-41 | Neuroblasts |
| Rit1.1 | Rit1.1 | 3.16E-45 | 1.135261668 | 0.597 | 0.299 | 7.19E-41 | Neuroblasts |
| Elavl3 | Elavl3 | 5.44E-45 | 1.092814354 | 0.475 | 0.19 | 1.24E-40 | Neuroblasts |
| Ttc3 | Ttc3 | 7.54E-45 | 0.841924023 | 0.858 | 0.673 | 1.71E-40 | Neuroblasts |
| Dpp6 | Dpp6 | 1.59E-44 | 1.936453847 | 0.539 | 0.26 | 3.61E-40 | Neuroblasts |
| Syt6 | Syt6 | 2.92E-44 | 1.207187746 | 0.265 | 0.053 | 6.62E-40 | Neuroblasts |
| Klf12 | Klf12 | 5.52E-44 | 0.888872675 | 0.891 | 0.767 | 1.25E-39 | Neuroblasts |
| Syt1 | Syt1 | 1.08E-43 | 1.364526066 | 0.79 | 0.616 | 2.46E-39 | Neuroblasts |
| Nxph1 | Nxph1 | 3.12E-43 | 2.068356613 | 0.366 | 0.118 | 7.08E-39 | Neuroblasts |
| Atcay | Atcay | 7.57E-43 | 1.042711794 | 0.284 | 0.063 | 1.72E-38 | Neuroblasts |
| Kalrn | Kalrn | 8.84E-43 | 0.898930647 | 0.817 | 0.624 | 2.01E-38 | Neuroblasts |
| Reep1 | Reep1 | 1.46E-42 | 1.088704629 | 0.354 | 0.106 | 3.31E-38 | Neuroblasts |
| Csrnp3 | Csrnp3 | 4.78E-42 | 1.211713213 | 0.447 | 0.181 | 1.09E-37 | Neuroblasts |
| Hecw1 | Hecw1 | 1.31E-41 | 1.074602687 | 0.317 | 0.084 | 2.97E-37 | Neuroblasts |
| Tspan5 | Tspan5 | 1.60E-41 | 1.129093884 | 0.71 | 0.463 | 3.64E-37 | Neuroblasts |
| Gria4 | Gria4 | 1.04E-40 | 1.545007064 | 0.514 | 0.262 | 2.35E-36 | Neuroblasts |
| Add2 | Add2 | 1.04E-40 | 0.971730861 | 0.329 | 0.091 | 2.37E-36 | Neuroblasts |
| Gabrb2 | Gabrb2 | 2.54E-40 | 1.152239903 | 0.397 | 0.141 | 5.78E-36 | Neuroblasts |
| Sorcs3 | Sorcs3 | 3.76E-40 | 1.364898162 | 0.284 | 0.07 | 8.54E-36 | Neuroblasts |
| Lrp8 | Lrp8 | 4.77E-40 | 1.012308064 | 0.44 | 0.175 | 1.08E-35 | Neuroblasts |
| Nell2 | Nell2 | 1.15E-39 | 0.943702021 | 0.533 | 0.236 | 2.60E-35 | Neuroblasts |
| Phactr1 | Phactr1 | 2.34E-39 | 0.759452496 | 0.93 | 0.861 | 5.31E-35 | Neuroblasts |
| Cdk14 | Cdk14 | 9.25E-39 | 0.997463549 | 0.757 | 0.542 | 2.10E-34 | Neuroblasts |
| Dpp10 | Dpp10 | 1.49E-38 | 1.782709543 | 0.453 | 0.208 | 3.39E-34 | Neuroblasts |
| Srgap2 | Srgap2 | 1.83E-38 | 1.067943422 | 0.716 | 0.505 | 4.17E-34 | Neuroblasts |
| Stxbp5l | Stxbp5l | 2.26E-38 | 1.087372561 | 0.467 | 0.204 | 5.12E-34 | Neuroblasts |
| Epha6 | Epha6 | 6.68E-38 | 2.490565752 | 0.506 | 0.277 | 1.52E-33 | Neuroblasts |
| Nsg2 | Nsg2 | 7.35E-38 | 0.922765786 | 0.702 | 0.455 | 1.67E-33 | Neuroblasts |
| Hn1 | Hn1 | 9.07E-38 | 0.950511849 | 0.309 | 0.087 | 2.06E-33 | Neuroblasts |
| Scn3a | Scn3a | 1.42E-37 | 1.10820188 | 0.379 | 0.135 | 3.23E-33 | Neuroblasts |
| Snap91 | Snap91 | 2.48E-37 | 0.992456423 | 0.422 | 0.165 | 5.63E-33 | Neuroblasts |
| Meis1 | Meis1 | 3.23E-37 | 1.244394855 | 0.514 | 0.261 | 7.35E-33 | Neuroblasts |
| Sorbs2os | Sorbs2os | 6.79E-37 | 0.934913436 | 0.263 | 0.064 | 1.54E-32 | Neuroblasts |
| Srrm3 | Srrm3 | 3.06E-36 | 0.883902349 | 0.253 | 0.059 | 6.95E-32 | Neuroblasts |
| Nnat | Nnat | 1.19E-35 | 0.833556639 | 0.679 | 0.405 | 2.71E-31 | Neuroblasts |
| Plppr3 | Plppr3 | 1.22E-35 | 0.821314299 | 0.263 | 0.064 | 2.77E-31 | Neuroblasts |
| Zfp385b | Zfp385b | 2.38E-35 | 1.39746151 | 0.473 | 0.237 | 5.40E-31 | Neuroblasts |
| Rere | Rere | 3.63E-35 | 0.761008145 | 0.858 | 0.712 | 8.25E-31 | Neuroblasts |
| Lrrtm4 | Lrrtm4 | 7.61E-35 | 1.31244489 | 0.72 | 0.556 | 1.73E-30 | Neuroblasts |
| Kcnd3 | Kcnd3 | 1.63E-34 | 1.421444359 | 0.379 | 0.144 | 3.71E-30 | Neuroblasts |
| Stmn1 | Stmn1 | 1.76E-34 | 0.929155694 | 0.428 | 0.176 | 4.00E-30 | Neuroblasts |
| Dlgap4 | Dlgap4 | 1.77E-34 | 0.901718838 | 0.537 | 0.276 | 4.01E-30 | Neuroblasts |
| Sobp | Sobp | 8.63E-34 | 0.963847938 | 0.539 | 0.277 | 1.96E-29 | Neuroblasts |
| Csmd3 | Csmd3 | 1.09E-33 | 1.011555536 | 0.73 | 0.549 | 2.48E-29 | Neuroblasts |
| Dclk1 | Dclk1 | 1.94E-33 | 0.695857905 | 0.887 | 0.788 | 4.41E-29 | Neuroblasts |
| Dcbld1 | Dcbld1 | 2.24E-33 | 1.122549677 | 0.309 | 0.101 | 5.10E-29 | Neuroblasts |
| Dock7 | Dock7 | 4.54E-33 | 0.956516987 | 0.601 | 0.372 | 1.03E-28 | Neuroblasts |
| Sgcd | Sgcd | 5.25E-33 | 1.552814383 | 0.51 | 0.27 | 1.19E-28 | Neuroblasts |
| Cdon | Cdon | 5.71E-33 | 0.870934322 | 0.393 | 0.153 | 1.30E-28 | Neuroblasts |
| Setbp1 | Setbp1 | 6.42E-33 | 0.673508623 | 0.833 | 0.665 | 1.46E-28 | Neuroblasts |
| Sh3d19 | Sh3d19 | 1.12E-32 | 1.096096399 | 0.294 | 0.092 | 2.55E-28 | Neuroblasts |
| Arid1b | Arid1b | 1.69E-32 | 0.822727255 | 0.786 | 0.612 | 3.85E-28 | Neuroblasts |
| Arx | Arx | 2.01E-32 | 0.875945535 | 0.272 | 0.075 | 4.56E-28 | Neuroblasts |
| Cdk17 | Cdk17 | 3.61E-32 | 0.856657941 | 0.66 | 0.424 | 8.20E-28 | Neuroblasts |
| Gm42439 | Gm42439 | 4.05E-32 | 1.019787946 | 0.461 | 0.22 | 9.20E-28 | Neuroblasts |
| C130073E24Rik | C130073E24Rik | 5.36E-32 | 1.969868138 | 0.255 | 0.073 | 1.22E-27 | Neuroblasts |
| E130308A19Rik | E130308A19Rik | 3.38E-31 | 0.932707762 | 0.403 | 0.17 | 7.69E-27 | Neuroblasts |
| Ubash3b | Ubash3b | 5.26E-31 | 1.075468751 | 0.379 | 0.16 | 1.20E-26 | Neuroblasts |
| Hcn1 | Hcn1 | 1.04E-30 | 1.584692703 | 0.305 | 0.107 | 2.37E-26 | Neuroblasts |
| Plcl2 | Plcl2 | 2.42E-30 | 0.984086603 | 0.434 | 0.206 | 5.49E-26 | Neuroblasts |
| Atp8a2 | Atp8a2 | 3.35E-30 | 0.914412117 | 0.267 | 0.08 | 7.61E-26 | Neuroblasts |
| Snap25 | Snap25 | 3.46E-30 | 0.813848729 | 0.747 | 0.582 | 7.87E-26 | Neuroblasts |
| Kcnq1ot1 | Kcnq1ot1 | 5.42E-30 | 0.981565096 | 0.459 | 0.215 | 1.23E-25 | Neuroblasts |
| Rtn3 | Rtn3 | 9.15E-30 | 0.701634423 | 0.815 | 0.68 | 2.08E-25 | Neuroblasts |
| Crmp1 | Crmp1 | 1.47E-29 | 0.795179563 | 0.251 | 0.07 | 3.34E-25 | Neuroblasts |
| Pcdh15 | Pcdh15 | 2.03E-29 | 2.163310159 | 0.405 | 0.201 | 4.61E-25 | Neuroblasts |
| Fam19a2 | Fam19a2 | 2.19E-29 | 1.637846149 | 0.267 | 0.088 | 4.96E-25 | Neuroblasts |
| Rbfox2 | Rbfox2 | 5.89E-29 | 0.733858161 | 0.724 | 0.51 | 1.34E-24 | Neuroblasts |
| Cacna1b | Cacna1b | 6.36E-29 | 0.795955157 | 0.288 | 0.094 | 1.44E-24 | Neuroblasts |
| App | App | 1.66E-28 | 0.754705137 | 0.759 | 0.582 | 3.78E-24 | Neuroblasts |
| Dync1i1 | Dync1i1 | 3.16E-28 | 1.326516394 | 0.274 | 0.091 | 7.19E-24 | Neuroblasts |
| Nyap2 | Nyap2 | 3.54E-28 | 0.944744346 | 0.29 | 0.099 | 8.03E-24 | Neuroblasts |
| Ano6 | Ano6 | 4.56E-28 | 0.830785426 | 0.317 | 0.115 | 1.03E-23 | Neuroblasts |
| Jakmip2 | Jakmip2 | 4.96E-28 | 0.912403652 | 0.424 | 0.203 | 1.13E-23 | Neuroblasts |
| Raph1 | Raph1 | 7.32E-28 | 0.898720781 | 0.397 | 0.179 | 1.66E-23 | Neuroblasts |
| St7 | St7 | 9.38E-28 | 0.889826879 | 0.488 | 0.259 | 2.13E-23 | Neuroblasts |
| Tanc2 | Tanc2 | 1.19E-27 | 0.855010795 | 0.708 | 0.552 | 2.71E-23 | Neuroblasts |
| Sh3gl2 | Sh3gl2 | 2.19E-27 | 0.927019726 | 0.307 | 0.111 | 4.96E-23 | Neuroblasts |
| Erc2 | Erc2 | 6.63E-27 | 1.044193415 | 0.564 | 0.375 | 1.51E-22 | Neuroblasts |
| Foxn3 | Foxn3 | 1.25E-26 | 0.802094047 | 0.763 | 0.617 | 2.84E-22 | Neuroblasts |
| Syt16 | Syt16 | 3.62E-26 | 0.842316351 | 0.255 | 0.083 | 8.22E-22 | Neuroblasts |
| Sipa1l1 | Sipa1l1 | 2.17E-25 | 0.873061309 | 0.516 | 0.308 | 4.94E-21 | Neuroblasts |
| Fyn | Fyn | 2.62E-25 | 0.837262195 | 0.562 | 0.365 | 5.95E-21 | Neuroblasts |
| Mast2 | Mast2 | 2.91E-25 | 0.822602857 | 0.504 | 0.283 | 6.61E-21 | Neuroblasts |
| Cep170 | Cep170 | 2.99E-25 | 0.843621189 | 0.498 | 0.287 | 6.78E-21 | Neuroblasts |
| Kif5a | Kif5a | 3.37E-25 | 0.78693577 | 0.333 | 0.136 | 7.66E-21 | Neuroblasts |
| D630045J12Rik | D630045J12Rik | 3.52E-25 | 0.810514157 | 0.29 | 0.106 | 8.00E-21 | Neuroblasts |
| Fam110b | Fam110b | 9.50E-25 | 1.021767527 | 0.486 | 0.285 | 2.16E-20 | Neuroblasts |
| B230334C09Rik | B230334C09Rik | 1.03E-24 | 0.801347373 | 0.321 | 0.13 | 2.34E-20 | Neuroblasts |
| Gpr137c | Gpr137c | 1.08E-24 | 0.894046468 | 0.461 | 0.247 | 2.45E-20 | Neuroblasts |
| Slc4a7 | Slc4a7 | 2.88E-24 | 0.756525452 | 0.333 | 0.139 | 6.53E-20 | Neuroblasts |
| Ralgps1 | Ralgps1 | 3.64E-24 | 0.841858029 | 0.44 | 0.232 | 8.28E-20 | Neuroblasts |
| Syn1 | Syn1 | 4.60E-24 | 0.786256786 | 0.286 | 0.109 | 1.04E-19 | Neuroblasts |
| Dync1i2 | Dync1i2 | 4.70E-24 | 0.802226167 | 0.51 | 0.305 | 1.07E-19 | Neuroblasts |
| Ptprn2 | Ptprn2 | 5.79E-24 | 0.863155131 | 0.63 | 0.476 | 1.32E-19 | Neuroblasts |
| Syne2 | Syne2 | 9.42E-24 | 0.806752346 | 0.389 | 0.187 | 2.14E-19 | Neuroblasts |
| Ralgapa2 | Ralgapa2 | 2.09E-23 | 0.858537916 | 0.473 | 0.274 | 4.76E-19 | Neuroblasts |
| Tcf4 | Tcf4 | 2.39E-23 | 0.599446418 | 0.975 | 0.962 | 5.42E-19 | Neuroblasts |
| Ephb2 | Ephb2 | 2.51E-23 | 0.729902369 | 0.274 | 0.099 | 5.71E-19 | Neuroblasts |
| Tmeff2 | Tmeff2 | 3.10E-23 | 1.506207602 | 0.432 | 0.247 | 7.04E-19 | Neuroblasts |
| Pdzd4 | Pdzd4 | 4.70E-23 | 0.769885882 | 0.27 | 0.101 | 1.07E-18 | Neuroblasts |
| Btg1 | Btg1 | 5.25E-23 | 0.81928343 | 0.292 | 0.119 | 1.19E-18 | Neuroblasts |
| Ptbp2 | Ptbp2 | 6.98E-23 | 0.717661365 | 0.611 | 0.421 | 1.58E-18 | Neuroblasts |
| Gabrg2 | Gabrg2 | 8.59E-23 | 0.824747004 | 0.292 | 0.117 | 1.95E-18 | Neuroblasts |
| Lmo3 | Lmo3 | 8.60E-23 | 0.855302394 | 0.321 | 0.139 | 1.95E-18 | Neuroblasts |
| Gm20687 | Gm20687 | 1.90E-22 | 0.7257759 | 0.319 | 0.136 | 4.33E-18 | Neuroblasts |
| Cdh8 | Cdh8 | 2.17E-22 | 1.113891704 | 0.42 | 0.228 | 4.92E-18 | Neuroblasts |
| Pde1c | Pde1c | 3.05E-22 | 0.764049696 | 0.391 | 0.192 | 6.92E-18 | Neuroblasts |
| Sez6 | Sez6 | 3.19E-22 | 0.815192267 | 0.455 | 0.253 | 7.25E-18 | Neuroblasts |
| Soga3 | Soga3 | 4.23E-22 | 0.864096205 | 0.467 | 0.278 | 9.62E-18 | Neuroblasts |
| Gdpd1 | Gdpd1 | 4.39E-22 | 0.846923308 | 0.298 | 0.125 | 9.97E-18 | Neuroblasts |
| Rtn1 | Rtn1 | 4.49E-22 | 0.585206298 | 0.794 | 0.668 | 1.02E-17 | Neuroblasts |
| Bcor | Bcor | 6.55E-22 | 0.796253401 | 0.28 | 0.113 | 1.49E-17 | Neuroblasts |
| Afdn | Afdn | 9.79E-22 | 0.83038565 | 0.461 | 0.271 | 2.22E-17 | Neuroblasts |
| Sncaip | Sncaip | 1.38E-21 | 0.719005609 | 0.467 | 0.256 | 3.13E-17 | Neuroblasts |
| Dbn1 | Dbn1 | 1.59E-21 | 0.710797269 | 0.28 | 0.113 | 3.61E-17 | Neuroblasts |
| Cntnap2 | Cntnap2 | 1.94E-21 | 0.962955189 | 0.792 | 0.742 | 4.41E-17 | Neuroblasts |
| Kcnj3 | Kcnj3 | 2.16E-21 | 1.068856439 | 0.259 | 0.101 | 4.90E-17 | Neuroblasts |
| Dpysl2 | Dpysl2 | 3.53E-21 | 0.682928271 | 0.601 | 0.409 | 8.03E-17 | Neuroblasts |
| Stau2 | Stau2 | 4.44E-21 | 0.731811539 | 0.457 | 0.256 | 1.01E-16 | Neuroblasts |
| Ttc39c | Ttc39c | 4.96E-21 | 0.676597635 | 0.253 | 0.095 | 1.13E-16 | Neuroblasts |
| Rnf150 | Rnf150 | 7.24E-21 | 0.891178045 | 0.3 | 0.13 | 1.64E-16 | Neuroblasts |
| Akap9 | Akap9 | 1.00E-20 | 0.700812683 | 0.621 | 0.447 | 2.27E-16 | Neuroblasts |
| Cask | Cask | 1.62E-20 | 0.783616463 | 0.584 | 0.409 | 3.68E-16 | Neuroblasts |
| H3f3a | H3f3a | 2.39E-20 | 0.741508107 | 0.494 | 0.306 | 5.42E-16 | Neuroblasts |
| Pkia | Pkia | 2.47E-20 | 0.797653447 | 0.438 | 0.247 | 5.61E-16 | Neuroblasts |
| Ksr2 | Ksr2 | 4.00E-20 | 0.770135371 | 0.492 | 0.309 | 9.10E-16 | Neuroblasts |
| Cmip | Cmip | 4.37E-20 | 0.686728963 | 0.521 | 0.337 | 9.93E-16 | Neuroblasts |
| Efnb2 | Efnb2 | 4.62E-20 | 0.791822308 | 0.346 | 0.17 | 1.05E-15 | Neuroblasts |
| Fgf13 | Fgf13 | 6.51E-20 | 0.854012545 | 0.673 | 0.52 | 1.48E-15 | Neuroblasts |
| Znrf1 | Znrf1 | 9.09E-20 | 0.767990725 | 0.412 | 0.231 | 2.06E-15 | Neuroblasts |
| Slc25a27 | Slc25a27 | 9.84E-20 | 0.716975403 | 0.34 | 0.16 | 2.24E-15 | Neuroblasts |
| Sestd1 | Sestd1 | 2.29E-19 | 0.677053778 | 0.29 | 0.127 | 5.19E-15 | Neuroblasts |
| Tcf20 | Tcf20 | 2.93E-19 | 0.732305337 | 0.568 | 0.381 | 6.66E-15 | Neuroblasts |
| Tshz2 | Tshz2 | 2.95E-19 | 0.995137039 | 0.276 | 0.119 | 6.71E-15 | Neuroblasts |
| Mtf2 | Mtf2 | 3.67E-19 | 0.652515977 | 0.428 | 0.242 | 8.34E-15 | Neuroblasts |
| Lmnb1 | Lmnb1 | 5.07E-19 | 0.542637169 | 0.253 | 0.095 | 1.15E-14 | Neuroblasts |
| Atrx | Atrx | 6.07E-19 | 0.542240617 | 0.689 | 0.522 | 1.38E-14 | Neuroblasts |
| Mvb12b | Mvb12b | 6.24E-19 | 0.781045821 | 0.412 | 0.232 | 1.42E-14 | Neuroblasts |
| Miat | Miat | 6.33E-19 | 0.513401102 | 0.331 | 0.153 | 1.44E-14 | Neuroblasts |
| Lrrc8d | Lrrc8d | 9.07E-19 | 0.739376088 | 0.333 | 0.162 | 2.06E-14 | Neuroblasts |
| Ctnna3 | Ctnna3 | 9.45E-19 | 0.814894766 | 0.3 | 0.135 | 2.15E-14 | Neuroblasts |
| Asap1 | Asap1 | 2.83E-18 | 0.823369911 | 0.621 | 0.502 | 6.43E-14 | Neuroblasts |
| Chd3 | Chd3 | 3.63E-18 | 0.687356205 | 0.307 | 0.146 | 8.25E-14 | Neuroblasts |
| Zmiz1 | Zmiz1 | 4.67E-18 | 0.707823396 | 0.615 | 0.477 | 1.06E-13 | Neuroblasts |
| Plekha5 | Plekha5 | 5.91E-18 | 0.749818325 | 0.586 | 0.43 | 1.34E-13 | Neuroblasts |
| Zc3h12c | Zc3h12c | 7.63E-18 | 0.759939271 | 0.335 | 0.173 | 1.73E-13 | Neuroblasts |
| Ulk2 | Ulk2 | 7.74E-18 | 0.669844663 | 0.481 | 0.303 | 1.76E-13 | Neuroblasts |
| Ppip5k2 | Ppip5k2 | 8.93E-18 | 0.695320557 | 0.29 | 0.133 | 2.03E-13 | Neuroblasts |
| Camta1 | Camta1 | 1.62E-17 | 0.645418879 | 0.658 | 0.521 | 3.68E-13 | Neuroblasts |
| Atl1 | Atl1 | 2.77E-17 | 0.679323938 | 0.354 | 0.186 | 6.30E-13 | Neuroblasts |
| Atp9a | Atp9a | 3.27E-17 | 0.64735123 | 0.323 | 0.158 | 7.42E-13 | Neuroblasts |
| Camsap1 | Camsap1 | 4.19E-17 | 0.687353639 | 0.364 | 0.199 | 9.51E-13 | Neuroblasts |
| Scg5 | Scg5 | 4.51E-17 | 0.6196306 | 0.512 | 0.338 | 1.03E-12 | Neuroblasts |
| Usp3 | Usp3 | 4.66E-17 | 0.734441864 | 0.416 | 0.249 | 1.06E-12 | Neuroblasts |
| H13 | H13 | 5.30E-17 | 0.647938315 | 0.265 | 0.118 | 1.20E-12 | Neuroblasts |
| Tcte2 | Tcte2 | 5.35E-17 | 0.728268744 | 0.317 | 0.157 | 1.22E-12 | Neuroblasts |
| Syt14 | Syt14 | 6.13E-17 | 0.664477017 | 0.29 | 0.137 | 1.39E-12 | Neuroblasts |
| Myo5a | Myo5a | 6.64E-17 | 0.63386865 | 0.473 | 0.295 | 1.51E-12 | Neuroblasts |
| Map4k4 | Map4k4 | 8.23E-17 | 0.584342935 | 0.671 | 0.515 | 1.87E-12 | Neuroblasts |
| Thsd7a | Thsd7a | 1.07E-16 | 0.9430335 | 0.451 | 0.291 | 2.42E-12 | Neuroblasts |
| Kif5c | Kif5c | 1.18E-16 | 0.678738234 | 0.34 | 0.179 | 2.68E-12 | Neuroblasts |
| Arhgef7 | Arhgef7 | 1.33E-16 | 0.66927364 | 0.335 | 0.174 | 3.01E-12 | Neuroblasts |
| Khdrbs2 | Khdrbs2 | 1.36E-16 | 0.919248084 | 0.259 | 0.12 | 3.09E-12 | Neuroblasts |
| Rab8b | Rab8b | 1.49E-16 | 0.625905012 | 0.278 | 0.127 | 3.38E-12 | Neuroblasts |
| Ppm1e | Ppm1e | 1.51E-16 | 0.874137875 | 0.541 | 0.407 | 3.42E-12 | Neuroblasts |
| Ube2d1 | Ube2d1 | 2.46E-16 | 0.681213988 | 0.263 | 0.119 | 5.58E-12 | Neuroblasts |
| Nsd2 | Nsd2 | 3.06E-16 | 0.522332648 | 0.479 | 0.291 | 6.95E-12 | Neuroblasts |
| Tcf12 | Tcf12 | 3.09E-16 | 0.528016399 | 0.8 | 0.722 | 7.02E-12 | Neuroblasts |
| Arpp21 | Arpp21 | 3.45E-16 | 1.018079755 | 0.58 | 0.468 | 7.83E-12 | Neuroblasts |
| Hdgfl3 | Hdgfl3 | 3.49E-16 | 0.69413 | 0.428 | 0.266 | 7.94E-12 | Neuroblasts |
| Unc13b | Unc13b | 4.66E-16 | 0.644509423 | 0.259 | 0.116 | 1.06E-11 | Neuroblasts |
| Camk4 | Camk4 | 8.30E-16 | 0.811759085 | 0.455 | 0.299 | 1.88E-11 | Neuroblasts |
| 2610008E11Rik | 2610008E11Rik | 1.40E-15 | 0.655454248 | 0.3 | 0.155 | 3.18E-11 | Neuroblasts |
| Hmbox1 | Hmbox1 | 2.41E-15 | 0.628413981 | 0.426 | 0.266 | 5.47E-11 | Neuroblasts |
| Sgce | Sgce | 2.44E-15 | 0.662165238 | 0.422 | 0.261 | 5.55E-11 | Neuroblasts |
| Cep120 | Cep120 | 2.99E-15 | 0.641261288 | 0.305 | 0.157 | 6.79E-11 | Neuroblasts |
| Cacng4 | Cacng4 | 3.07E-15 | 0.66679456 | 0.292 | 0.145 | 6.98E-11 | Neuroblasts |
| Mir124-2hg | Mir124-2hg | 3.22E-15 | 0.695141153 | 0.282 | 0.14 | 7.31E-11 | Neuroblasts |
| Wdfy3 | Wdfy3 | 4.23E-15 | 0.620062456 | 0.595 | 0.46 | 9.61E-11 | Neuroblasts |
| Grin2b | Grin2b | 4.54E-15 | 0.774368122 | 0.595 | 0.488 | 1.03E-10 | Neuroblasts |
| Atp11c | Atp11c | 5.02E-15 | 0.658636351 | 0.414 | 0.252 | 1.14E-10 | Neuroblasts |
| 4930517O19Rik | 4930517O19Rik | 5.72E-15 | 0.707061454 | 0.381 | 0.22 | 1.30E-10 | Neuroblasts |
| Zcchc14 | Zcchc14 | 7.95E-15 | 0.66800303 | 0.412 | 0.257 | 1.81E-10 | Neuroblasts |
| Phtf2 | Phtf2 | 8.89E-15 | 0.593887854 | 0.265 | 0.128 | 2.02E-10 | Neuroblasts |
| Gm37679 | Gm37679 | 9.03E-15 | 0.633665369 | 0.344 | 0.193 | 2.05E-10 | Neuroblasts |
| Klhl7 | Klhl7 | 1.26E-14 | 0.601979244 | 0.469 | 0.308 | 2.86E-10 | Neuroblasts |
| Lcor | Lcor | 1.27E-14 | 0.665165422 | 0.537 | 0.392 | 2.88E-10 | Neuroblasts |
| Pgm2l1 | Pgm2l1 | 1.39E-14 | 0.590818562 | 0.257 | 0.119 | 3.16E-10 | Neuroblasts |
| Brinp1 | Brinp1 | 2.05E-14 | 0.752363007 | 0.321 | 0.174 | 4.65E-10 | Neuroblasts |
| Spon1 | Spon1 | 2.11E-14 | 0.857291665 | 0.498 | 0.369 | 4.80E-10 | Neuroblasts |
| Zfp292 | Zfp292 | 2.26E-14 | 0.637181224 | 0.527 | 0.382 | 5.13E-10 | Neuroblasts |
| Tcaf1 | Tcaf1 | 3.19E-14 | 0.639394965 | 0.508 | 0.354 | 7.24E-10 | Neuroblasts |
| Cacna1a | Cacna1a | 3.55E-14 | 0.635312338 | 0.426 | 0.267 | 8.06E-10 | Neuroblasts |
| Plppr1 | Plppr1 | 3.70E-14 | 0.70483425 | 0.294 | 0.155 | 8.41E-10 | Neuroblasts |
| Ctif | Ctif | 3.76E-14 | 0.619787391 | 0.467 | 0.312 | 8.54E-10 | Neuroblasts |
| Phc2 | Phc2 | 3.78E-14 | 0.627904793 | 0.346 | 0.196 | 8.59E-10 | Neuroblasts |
| Dnm3 | Dnm3 | 3.84E-14 | 0.738746853 | 0.399 | 0.246 | 8.73E-10 | Neuroblasts |
| Lrrtm3 | Lrrtm3 | 4.63E-14 | 0.912976477 | 0.352 | 0.219 | 1.05E-09 | Neuroblasts |
| Clasp1 | Clasp1 | 5.75E-14 | 0.584253209 | 0.621 | 0.509 | 1.31E-09 | Neuroblasts |
| Magi1 | Magi1 | 9.23E-14 | 0.463610591 | 0.751 | 0.651 | 2.10E-09 | Neuroblasts |
| Ssbp3 | Ssbp3 | 9.25E-14 | 0.65509347 | 0.393 | 0.246 | 2.10E-09 | Neuroblasts |
| Cdh2 | Cdh2 | 9.84E-14 | 0.508297398 | 0.79 | 0.729 | 2.23E-09 | Neuroblasts |
| Cntn5 | Cntn5 | 1.13E-13 | 1.202590319 | 0.578 | 0.482 | 2.57E-09 | Neuroblasts |
| Apba1 | Apba1 | 1.51E-13 | 0.692030377 | 0.424 | 0.267 | 3.42E-09 | Neuroblasts |
| Slc38a1 | Slc38a1 | 1.55E-13 | 0.406552185 | 0.385 | 0.217 | 3.52E-09 | Neuroblasts |
| St6gal1 | St6gal1 | 2.92E-13 | 0.681576245 | 0.496 | 0.368 | 6.64E-09 | Neuroblasts |
| Rbfox1 | Rbfox1 | 5.04E-13 | 0.750676161 | 0.784 | 0.735 | 1.15E-08 | Neuroblasts |
| Mtus1 | Mtus1 | 5.64E-13 | 0.560792583 | 0.276 | 0.144 | 1.28E-08 | Neuroblasts |
| Fgf14 | Fgf14 | 5.87E-13 | 0.676643125 | 0.909 | 0.922 | 1.33E-08 | Neuroblasts |
| Rab11fip3 | Rab11fip3 | 6.49E-13 | 0.628978255 | 0.436 | 0.296 | 1.47E-08 | Neuroblasts |
| Trio | Trio | 6.66E-13 | 0.613307196 | 0.541 | 0.403 | 1.51E-08 | Neuroblasts |
| Kif2a | Kif2a | 7.04E-13 | 0.622442198 | 0.358 | 0.211 | 1.60E-08 | Neuroblasts |
| Dlg2 | Dlg2 | 7.21E-13 | 0.819725902 | 0.842 | 0.829 | 1.64E-08 | Neuroblasts |
| Gm38393 | Gm38393 | 8.30E-13 | 0.629166144 | 0.329 | 0.193 | 1.88E-08 | Neuroblasts |
| Pam | Pam | 1.08E-12 | 0.860879318 | 0.539 | 0.416 | 2.46E-08 | Neuroblasts |
| AC153912.1 | AC153912.1 | 1.30E-12 | 0.551515862 | 0.284 | 0.151 | 2.95E-08 | Neuroblasts |
| Zcchc11 | Zcchc11 | 1.40E-12 | 0.520117162 | 0.597 | 0.468 | 3.18E-08 | Neuroblasts |
| Prkca | Prkca | 2.26E-12 | 0.758303219 | 0.416 | 0.274 | 5.14E-08 | Neuroblasts |
| Myh10 | Myh10 | 2.33E-12 | 0.635925023 | 0.327 | 0.195 | 5.28E-08 | Neuroblasts |
| Acvr1 | Acvr1 | 2.66E-12 | 0.587232824 | 0.309 | 0.175 | 6.05E-08 | Neuroblasts |
| Kdm1a | Kdm1a | 2.79E-12 | 0.582604296 | 0.34 | 0.201 | 6.33E-08 | Neuroblasts |
| Exoc6b | Exoc6b | 3.03E-12 | 0.446152664 | 0.675 | 0.561 | 6.87E-08 | Neuroblasts |
| Fbxo11 | Fbxo11 | 3.38E-12 | 0.560752703 | 0.545 | 0.412 | 7.67E-08 | Neuroblasts |
| Soga1 | Soga1 | 3.45E-12 | 0.586972371 | 0.27 | 0.144 | 7.84E-08 | Neuroblasts |
| Pde7a | Pde7a | 4.02E-12 | 0.549456998 | 0.362 | 0.218 | 9.13E-08 | Neuroblasts |
| Kdm2b | Kdm2b | 4.50E-12 | 0.561913101 | 0.276 | 0.148 | 1.02E-07 | Neuroblasts |
| Arhgef2 | Arhgef2 | 7.42E-12 | 0.575402252 | 0.251 | 0.132 | 1.69E-07 | Neuroblasts |
| Gls | Gls | 7.59E-12 | 0.509007431 | 0.521 | 0.383 | 1.72E-07 | Neuroblasts |
| Mycbp2 | Mycbp2 | 8.47E-12 | 0.439440655 | 0.743 | 0.658 | 1.92E-07 | Neuroblasts |
| Khdrbs1 | Khdrbs1 | 9.21E-12 | 0.589823576 | 0.457 | 0.328 | 2.09E-07 | Neuroblasts |
| Prkar1b | Prkar1b | 1.01E-11 | 0.509758901 | 0.251 | 0.128 | 2.30E-07 | Neuroblasts |
| Zfp157 | Zfp157 | 1.81E-11 | 0.567741039 | 0.255 | 0.135 | 4.11E-07 | Neuroblasts |
| Mcmbp | Mcmbp | 2.11E-11 | 0.593416561 | 0.307 | 0.179 | 4.79E-07 | Neuroblasts |
| Neto2 | Neto2 | 2.13E-11 | 0.592538787 | 0.323 | 0.19 | 4.84E-07 | Neuroblasts |
| Gsk3b | Gsk3b | 2.71E-11 | 0.490310893 | 0.704 | 0.63 | 6.16E-07 | Neuroblasts |
| Ywhaq | Ywhaq | 3.12E-11 | 0.524748767 | 0.414 | 0.274 | 7.09E-07 | Neuroblasts |
| Fam117b | Fam117b | 3.63E-11 | 0.548818257 | 0.288 | 0.163 | 8.24E-07 | Neuroblasts |
| Sptan1 | Sptan1 | 4.90E-11 | 0.497655311 | 0.465 | 0.329 | 1.11E-06 | Neuroblasts |
| Rims2 | Rims2 | 5.02E-11 | 0.437902495 | 0.73 | 0.663 | 1.14E-06 | Neuroblasts |
| Trim33 | Trim33 | 5.07E-11 | 0.549184474 | 0.436 | 0.3 | 1.15E-06 | Neuroblasts |
| Phf14 | Phf14 | 5.42E-11 | 0.483757382 | 0.617 | 0.509 | 1.23E-06 | Neuroblasts |
| Sbf2 | Sbf2 | 7.31E-11 | 0.492774603 | 0.584 | 0.471 | 1.66E-06 | Neuroblasts |
| Pknox2 | Pknox2 | 1.07E-10 | 0.663339089 | 0.346 | 0.223 | 2.44E-06 | Neuroblasts |
| Iqgap1 | Iqgap1 | 1.17E-10 | 0.510380122 | 0.255 | 0.138 | 2.65E-06 | Neuroblasts |
| Hectd4 | Hectd4 | 1.25E-10 | 0.558077437 | 0.428 | 0.299 | 2.83E-06 | Neuroblasts |
| Gtdc1 | Gtdc1 | 1.44E-10 | 0.494823083 | 0.426 | 0.286 | 3.27E-06 | Neuroblasts |
| Mbtd1 | Mbtd1 | 1.55E-10 | 0.474388703 | 0.562 | 0.441 | 3.53E-06 | Neuroblasts |
| Gucy1a2 | Gucy1a2 | 1.55E-10 | 0.552347053 | 0.44 | 0.305 | 3.53E-06 | Neuroblasts |
| Ppp1r9a | Ppp1r9a | 1.97E-10 | 0.441545894 | 0.747 | 0.666 | 4.47E-06 | Neuroblasts |
| C130071C03Rik | C130071C03Rik | 2.43E-10 | 0.486858112 | 0.767 | 0.71 | 5.53E-06 | Neuroblasts |
| Macrod2 | Macrod2 | 2.46E-10 | 0.827065598 | 0.815 | 0.799 | 5.59E-06 | Neuroblasts |
| Spast | Spast | 2.53E-10 | 0.530853309 | 0.319 | 0.198 | 5.75E-06 | Neuroblasts |
| Spats2 | Spats2 | 5.40E-10 | 0.484762022 | 0.265 | 0.151 | 1.23E-05 | Neuroblasts |
| Osbpl8 | Osbpl8 | 7.22E-10 | 0.578440888 | 0.5 | 0.386 | 1.64E-05 | Neuroblasts |
| Tmem57 | Tmem57 | 7.80E-10 | 0.5440629 | 0.377 | 0.252 | 1.77E-05 | Neuroblasts |
| Dhx57 | Dhx57 | 9.08E-10 | 0.537141586 | 0.284 | 0.171 | 2.06E-05 | Neuroblasts |
| Smarcad1 | Smarcad1 | 9.43E-10 | 0.51590097 | 0.383 | 0.262 | 2.14E-05 | Neuroblasts |
| Mical3 | Mical3 | 9.73E-10 | 0.5744266 | 0.362 | 0.246 | 2.21E-05 | Neuroblasts |
| Cacna2d1 | Cacna2d1 | 1.01E-09 | 0.606421303 | 0.477 | 0.371 | 2.29E-05 | Neuroblasts |
| Pde10a | Pde10a | 1.16E-09 | 0.418986045 | 0.681 | 0.573 | 2.64E-05 | Neuroblasts |
| Dennd5b | Dennd5b | 1.19E-09 | 0.513507064 | 0.442 | 0.321 | 2.71E-05 | Neuroblasts |
| Ube2h | Ube2h | 1.20E-09 | 0.514411725 | 0.484 | 0.372 | 2.71E-05 | Neuroblasts |
| St6galnac51 | St6galnac5 | 1.24E-09 | 0.611894296 | 0.397 | 0.272 | 2.83E-05 | Neuroblasts |
| Ralyl | Ralyl | 1.42E-09 | 0.573771266 | 0.372 | 0.252 | 3.22E-05 | Neuroblasts |
| 2410089E03Rik | 2410089E03Rik | 1.56E-09 | 0.517364547 | 0.488 | 0.368 | 3.54E-05 | Neuroblasts |
| Pum1 | Pum1 | 1.65E-09 | 0.481076734 | 0.535 | 0.427 | 3.75E-05 | Neuroblasts |
| Klf7 | Klf7 | 2.27E-09 | 0.518619192 | 0.593 | 0.498 | 5.16E-05 | Neuroblasts |
| Pum2 | Pum2 | 2.48E-09 | 0.40100259 | 0.471 | 0.344 | 5.64E-05 | Neuroblasts |
| Mapk8 | Mapk8 | 2.88E-09 | 0.507485666 | 0.331 | 0.215 | 6.53E-05 | Neuroblasts |
| Pola1 | Pola1 | 2.93E-09 | 0.382709941 | 0.329 | 0.198 | 6.66E-05 | Neuroblasts |
| Ezh2 | Ezh2 | 2.93E-09 | 0.449956405 | 0.34 | 0.214 | 6.67E-05 | Neuroblasts |
| Epha3 | Epha3 | 3.62E-09 | 0.663133142 | 0.259 | 0.149 | 8.22E-05 | Neuroblasts |
| Med13l | Med13l | 3.67E-09 | 0.515755731 | 0.432 | 0.324 | 8.33E-05 | Neuroblasts |
| 5330434G04Rik | 5330434G04Rik | 4.49E-09 | 0.561781044 | 0.286 | 0.176 | 0.000101947 | Neuroblasts |
| Tnpo1 | Tnpo1 | 5.14E-09 | 0.500265536 | 0.475 | 0.36 | 0.000116774 | Neuroblasts |
| Magi2 | Magi2 | 5.27E-09 | 0.307638416 | 0.963 | 0.976 | 0.000119755 | Neuroblasts |
| Rtf1 | Rtf1 | 5.45E-09 | 0.470563709 | 0.311 | 0.198 | 0.000123718 | Neuroblasts |
| Ddx42 | Ddx42 | 6.65E-09 | 0.483235021 | 0.302 | 0.19 | 0.000151022 | Neuroblasts |
| Nin | Nin | 6.68E-09 | 0.471742389 | 0.257 | 0.151 | 0.000151683 | Neuroblasts |
| Nalcn | Nalcn | 7.06E-09 | 0.579695045 | 0.329 | 0.215 | 0.000160303 | Neuroblasts |
| Ogt | Ogt | 7.37E-09 | 0.3937217 | 0.71 | 0.641 | 0.000167406 | Neuroblasts |
| Kansl1 | Kansl1 | 8.03E-09 | 0.366594307 | 0.802 | 0.734 | 0.000182332 | Neuroblasts |
| Ilf2 | Ilf2 | 8.27E-09 | 0.472239172 | 0.274 | 0.167 | 0.00018775 | Neuroblasts |
| Atpif1 | Atpif1 | 8.92E-09 | 0.443686413 | 0.296 | 0.186 | 0.000202574 | Neuroblasts |
| Srsf3 | Srsf3 | 9.77E-09 | 0.487733496 | 0.362 | 0.244 | 0.000221898 | Neuroblasts |
| Arid4b | Arid4b | 1.10E-08 | 0.44209218 | 0.523 | 0.428 | 0.000250204 | Neuroblasts |
| Myef2 | Myef2 | 1.17E-08 | 0.492634589 | 0.309 | 0.194 | 0.000264926 | Neuroblasts |
| Nfix | Nfix | 1.28E-08 | 0.506314389 | 0.49 | 0.379 | 0.000291462 | Neuroblasts |
| Agap1 | Agap1 | 1.44E-08 | 0.503283041 | 0.459 | 0.355 | 0.000327194 | Neuroblasts |
| Btbd9 | Btbd9 | 1.79E-08 | 0.497633387 | 0.562 | 0.476 | 0.000406737 | Neuroblasts |
| Rbm6 | Rbm6 | 1.80E-08 | 0.41141244 | 0.642 | 0.554 | 0.000409814 | Neuroblasts |
| Tia1 | Tia1 | 1.86E-08 | 0.460729417 | 0.438 | 0.326 | 0.000423174 | Neuroblasts |
| Fubp1 | Fubp1 | 1.96E-08 | 0.471521453 | 0.512 | 0.416 | 0.000444223 | Neuroblasts |
| Tnrc6c | Tnrc6c | 2.24E-08 | 0.455799902 | 0.599 | 0.503 | 0.000508681 | Neuroblasts |
| Xpo7 | Xpo7 | 2.55E-08 | 0.421356684 | 0.455 | 0.34 | 0.000579622 | Neuroblasts |
| Zdhhc17 | Zdhhc17 | 2.59E-08 | 0.469241233 | 0.405 | 0.284 | 0.00058807 | Neuroblasts |
| Top2b | Top2b | 2.82E-08 | 0.517123774 | 0.403 | 0.294 | 0.000639477 | Neuroblasts |
| Tulp4 | Tulp4 | 2.89E-08 | 0.370145194 | 0.619 | 0.53 | 0.000655822 | Neuroblasts |
| Tsc22d2 | Tsc22d2 | 3.25E-08 | 0.59172533 | 0.44 | 0.341 | 0.000737738 | Neuroblasts |
| Bcl9 | Bcl9 | 3.79E-08 | 0.504171509 | 0.407 | 0.299 | 0.000861725 | Neuroblasts |
| Tead1 | Tead1 | 4.49E-08 | 0.368241739 | 0.648 | 0.565 | 0.001018867 | Neuroblasts |
| Caprin1 | Caprin1 | 5.11E-08 | 0.471810468 | 0.422 | 0.311 | 0.001159948 | Neuroblasts |
| Bach2 | Bach2 | 5.62E-08 | 0.439070495 | 0.693 | 0.647 | 0.001276862 | Neuroblasts |
| Gm26848 | Gm26848 | 5.69E-08 | 0.431328232 | 0.455 | 0.347 | 0.001291765 | Neuroblasts |
| Pacs1 | Pacs1 | 6.01E-08 | 0.469055113 | 0.37 | 0.264 | 0.001364258 | Neuroblasts |
| Dlgap2 | Dlgap2 | 6.05E-08 | 0.803208786 | 0.284 | 0.192 | 0.001373053 | Neuroblasts |
| Ube2e3 | Ube2e3 | 6.39E-08 | 0.437221194 | 0.286 | 0.182 | 0.001452047 | Neuroblasts |
| Cnot2 | Cnot2 | 6.51E-08 | 0.44639953 | 0.444 | 0.341 | 0.001478607 | Neuroblasts |
| Abi2 | Abi2 | 6.54E-08 | 0.43362554 | 0.488 | 0.381 | 0.001485172 | Neuroblasts |
| Frmpd4 | Frmpd4 | 6.88E-08 | 0.692259984 | 0.348 | 0.255 | 0.001562222 | Neuroblasts |
| Ehmt1 | Ehmt1 | 6.93E-08 | 0.413674475 | 0.562 | 0.461 | 0.001574157 | Neuroblasts |
| Sorcs1 | Sorcs1 | 7.85E-08 | 0.946634512 | 0.29 | 0.198 | 0.001782279 | Neuroblasts |
| Srgap3 | Srgap3 | 8.13E-08 | 0.375992345 | 0.728 | 0.673 | 0.001845459 | Neuroblasts |
| Plekha1 | Plekha1 | 9.74E-08 | 0.488991607 | 0.267 | 0.17 | 0.002211748 | Neuroblasts |
| Rnf130 | Rnf130 | 1.02E-07 | 0.436743434 | 0.356 | 0.252 | 0.002322863 | Neuroblasts |
| Spock3 | Spock3 | 1.04E-07 | 0.449458867 | 0.607 | 0.535 | 0.002368581 | Neuroblasts |
| Zfp644 | Zfp644 | 1.05E-07 | 0.439066625 | 0.465 | 0.359 | 0.00239295 | Neuroblasts |
| Btrc | Btrc | 1.19E-07 | 0.415191971 | 0.44 | 0.334 | 0.002708643 | Neuroblasts |
| Myo9a | Myo9a | 1.21E-07 | 0.401663093 | 0.603 | 0.503 | 0.002740389 | Neuroblasts |
| C2cd5 | C2cd5 | 1.28E-07 | 0.405595432 | 0.444 | 0.349 | 0.002912243 | Neuroblasts |
| Phip | Phip | 1.36E-07 | 0.409780721 | 0.611 | 0.54 | 0.003079927 | Neuroblasts |
| Epha4 | Epha4 | 1.67E-07 | 0.709722294 | 0.447 | 0.364 | 0.003791172 | Neuroblasts |
| Chsy3 | Chsy3 | 1.70E-07 | 0.694246255 | 0.29 | 0.2 | 0.003859707 | Neuroblasts |
| H3f3b | H3f3b | 1.87E-07 | 0.454758747 | 0.34 | 0.236 | 0.004246919 | Neuroblasts |
| Bmpr2 | Bmpr2 | 1.89E-07 | 0.48452593 | 0.545 | 0.454 | 0.004286484 | Neuroblasts |
| Zfp266 | Zfp266 | 1.91E-07 | 0.448849375 | 0.36 | 0.256 | 0.004335551 | Neuroblasts |
| Vezt | Vezt | 2.00E-07 | 0.436272514 | 0.403 | 0.302 | 0.004543799 | Neuroblasts |
| Asic2 | Asic2 | 2.06E-07 | 0.290615123 | 0.387 | 0.58 | 0.004680412 | Neuroblasts |
| Dock11 | Dock11 | 2.52E-07 | 0.505988625 | 0.356 | 0.255 | 0.005731894 | Neuroblasts |
| Gnb1 | Gnb1 | 2.62E-07 | 0.360973072 | 0.562 | 0.465 | 0.005950728 | Neuroblasts |
| Zfp609 | Zfp609 | 2.87E-07 | 0.392138643 | 0.541 | 0.452 | 0.006513514 | Neuroblasts |
| Arih1 | Arih1 | 3.33E-07 | 0.390684911 | 0.609 | 0.535 | 0.007560248 | Neuroblasts |
| Fzd3 | Fzd3 | 3.56E-07 | 0.456141313 | 0.335 | 0.234 | 0.008091238 | Neuroblasts |
| Smarcc1 | Smarcc1 | 4.28E-07 | 0.442293407 | 0.442 | 0.343 | 0.009713588 | Neuroblasts |
| Rfx7 | Rfx7 | 4.30E-07 | 0.383038147 | 0.556 | 0.453 | 0.009769465 | Neuroblasts |
| Large1 | Large1 | 4.54E-07 | 0.396221125 | 0.621 | 0.561 | 0.01030951 | Neuroblasts |
| Sfpq | Sfpq | 4.86E-07 | 0.36008215 | 0.597 | 0.513 | 0.011044004 | Neuroblasts |
| Elmod1 | Elmod1 | 4.87E-07 | 0.418194132 | 0.463 | 0.368 | 0.011055355 | Neuroblasts |
| Ccar1 | Ccar1 | 5.03E-07 | 0.427750372 | 0.447 | 0.346 | 0.011420938 | Neuroblasts |
| Zfp462 | Zfp462 | 5.13E-07 | 0.531382779 | 0.496 | 0.412 | 0.011653733 | Neuroblasts |
| Cyfip2 | Cyfip2 | 5.54E-07 | 0.393221729 | 0.267 | 0.172 | 0.012579836 | Neuroblasts |
| Pbrm1 | Pbrm1 | 5.70E-07 | 0.3456628 | 0.525 | 0.428 | 0.012938509 | Neuroblasts |
| Fbxl20 | Fbxl20 | 6.03E-07 | 0.428640825 | 0.395 | 0.299 | 0.013702981 | Neuroblasts |
| Ncoa5 | Ncoa5 | 6.48E-07 | 0.423739118 | 0.321 | 0.221 | 0.014715098 | Neuroblasts |
| Prrc2b | Prrc2b | 7.15E-07 | 0.394147114 | 0.438 | 0.343 | 0.016240312 | Neuroblasts |
| Grm7 | Grm7 | 7.45E-07 | 0.697051579 | 0.533 | 0.475 | 0.01691955 | Neuroblasts |
| Megf9 | Megf9 | 7.47E-07 | 0.53771808 | 0.362 | 0.272 | 0.016955339 | Neuroblasts |
| Wdr47 | Wdr47 | 9.26E-07 | 0.455017123 | 0.307 | 0.215 | 0.021037349 | Neuroblasts |
| Tmcc1 | Tmcc1 | 1.10E-06 | 0.322524383 | 0.714 | 0.693 | 0.025008384 | Neuroblasts |
| Prkacb | Prkacb | 1.12E-06 | 0.431004146 | 0.405 | 0.324 | 0.025524852 | Neuroblasts |
| Marcks | Marcks | 1.16E-06 | 0.443355339 | 0.323 | 0.23 | 0.026264519 | Neuroblasts |
| Creb1 | Creb1 | 1.16E-06 | 0.487575358 | 0.397 | 0.3 | 0.026269815 | Neuroblasts |
| Mkl1 | Mkl1 | 1.16E-06 | 0.447692971 | 0.29 | 0.198 | 0.026340713 | Neuroblasts |
| Ube3a | Ube3a | 1.18E-06 | 0.356348851 | 0.556 | 0.481 | 0.026906081 | Neuroblasts |
| Tsc22d1 | Tsc22d1 | 1.23E-06 | 0.409721264 | 0.494 | 0.416 | 0.027951565 | Neuroblasts |
| Ireb2 | Ireb2 | 1.29E-06 | 0.415700573 | 0.296 | 0.202 | 0.029232569 | Neuroblasts |
| Rbmx | Rbmx | 1.40E-06 | 0.434860052 | 0.29 | 0.2 | 0.03190143 | Neuroblasts |
| Gm11149 | Gm11149 | 2.01E-06 | 0.51932503 | 0.389 | 0.299 | 0.045662016 | Neuroblasts |
| Grin1 | Grin1 | 2.25E-06 | 0.454220758 | 0.27 | 0.182 | 0.050991344 | Neuroblasts |
| Eml4 | Eml4 | 2.57E-06 | 0.427219602 | 0.325 | 0.235 | 0.058328597 | Neuroblasts |
| AC162302.1 | AC162302.1 | 2.80E-06 | 0.387552711 | 0.259 | 0.172 | 0.063546877 | Neuroblasts |
| Kdm5a | Kdm5a | 2.80E-06 | 0.449044604 | 0.385 | 0.305 | 0.063638253 | Neuroblasts |
| Sgcz | Sgcz | 2.92E-06 | 0.356626439 | 0.685 | 0.629 | 0.066357233 | Neuroblasts |
| Klhl29 | Klhl29 | 3.06E-06 | 0.572938687 | 0.263 | 0.182 | 0.069532112 | Neuroblasts |
| Dip2b | Dip2b | 3.25E-06 | 0.418129247 | 0.496 | 0.427 | 0.073777392 | Neuroblasts |
| Uhrf2 | Uhrf2 | 3.41E-06 | 0.396029768 | 0.403 | 0.314 | 0.077341171 | Neuroblasts |
| Rev3l | Rev3l | 3.50E-06 | 0.370094469 | 0.521 | 0.438 | 0.079509574 | Neuroblasts |
| Cers5 | Cers5 | 4.21E-06 | 0.379603968 | 0.261 | 0.176 | 0.095695844 | Neuroblasts |
| Psip1 | Psip1 | 4.27E-06 | 0.354585431 | 0.426 | 0.346 | 0.097056092 | Neuroblasts |
| Kif3c | Kif3c | 4.46E-06 | 0.403542113 | 0.259 | 0.177 | 0.101188018 | Neuroblasts |
| Snapc3 | Snapc3 | 4.52E-06 | 0.419280599 | 0.401 | 0.319 | 0.102606824 | Neuroblasts |
| Plcb4 | Plcb4 | 4.67E-06 | 0.507958765 | 0.516 | 0.457 | 0.106098716 | Neuroblasts |
| Rapgef6 | Rapgef6 | 5.30E-06 | 0.373032987 | 0.401 | 0.308 | 0.120444666 | Neuroblasts |
| Stmn3 | Stmn3 | 5.66E-06 | 0.404489882 | 0.331 | 0.246 | 0.128526972 | Neuroblasts |
| Mpdz | Mpdz | 5.87E-06 | 0.47848052 | 0.309 | 0.225 | 0.133435677 | Neuroblasts |
| Atf2 | Atf2 | 6.93E-06 | 0.374484642 | 0.465 | 0.381 | 0.157501641 | Neuroblasts |
| Hnrnpr | Hnrnpr | 7.57E-06 | 0.293025412 | 0.529 | 0.428 | 0.171957793 | Neuroblasts |
| Araf | Araf | 7.96E-06 | 0.429765726 | 0.383 | 0.301 | 0.180719018 | Neuroblasts |
| Gm20275 | Gm20275 | 8.35E-06 | 0.391122106 | 0.29 | 0.203 | 0.189753953 | Neuroblasts |
| Zfp148 | Zfp148 | 9.02E-06 | 0.350476211 | 0.531 | 0.446 | 0.204767307 | Neuroblasts |
| Unc5c | Unc5c | 9.90E-06 | 0.983265024 | 0.311 | 0.247 | 0.224942649 | Neuroblasts |
| Rhobtb3 | Rhobtb3 | 1.02E-05 | 0.418268686 | 0.296 | 0.211 | 0.231064963 | Neuroblasts |
| Zfp280d | Zfp280d | 1.19E-05 | 0.34894998 | 0.473 | 0.389 | 0.27091991 | Neuroblasts |
| Stxbp1 | Stxbp1 | 1.19E-05 | 0.367643122 | 0.311 | 0.225 | 0.271129619 | Neuroblasts |
| Adam22 | Adam22 | 1.27E-05 | 0.390377414 | 0.418 | 0.334 | 0.287887357 | Neuroblasts |
| Cttnbp2 | Cttnbp2 | 1.43E-05 | 0.431120435 | 0.574 | 0.524 | 0.325472444 | Neuroblasts |
| Zdhhc14 | Zdhhc14 | 1.46E-05 | 0.416378512 | 0.265 | 0.185 | 0.33104645 | Neuroblasts |
| Calm2 | Calm2 | 1.51E-05 | 0.304089848 | 0.704 | 0.674 | 0.342504661 | Neuroblasts |
| Trp53bp1 | Trp53bp1 | 1.56E-05 | 0.357056505 | 0.321 | 0.237 | 0.354325995 | Neuroblasts |
| Cblb | Cblb | 1.66E-05 | 0.371678324 | 0.364 | 0.284 | 0.375987427 | Neuroblasts |
| Rab6b | Rab6b | 1.66E-05 | 0.345334704 | 0.313 | 0.227 | 0.37752994 | Neuroblasts |
| Ly6h | Ly6h | 1.70E-05 | 0.339068583 | 0.319 | 0.234 | 0.385017748 | Neuroblasts |
| Slc6a6 | Slc6a6 | 1.83E-05 | 0.284077319 | 0.29 | 0.202 | 0.416756386 | Neuroblasts |
| Grm5 | Grm5 | 1.91E-05 | 0.383277107 | 0.722 | 0.692 | 0.432922124 | Neuroblasts |
| Itgb1 | Itgb1 | 2.01E-05 | 0.357686609 | 0.251 | 0.173 | 0.457440726 | Neuroblasts |
| Amn1 | Amn1 | 2.04E-05 | 0.413550516 | 0.3 | 0.219 | 0.462442215 | Neuroblasts |
| Senp7 | Senp7 | 2.16E-05 | 0.329264833 | 0.459 | 0.382 | 0.490868944 | Neuroblasts |
| Cnot7 | Cnot7 | 2.16E-05 | 0.367965757 | 0.253 | 0.176 | 0.491639791 | Neuroblasts |
| Atrnl1 | Atrnl1 | 2.24E-05 | 0.449022612 | 0.385 | 0.311 | 0.509846021 | Neuroblasts |
| Ap2b1 | Ap2b1 | 2.25E-05 | 0.326983491 | 0.393 | 0.305 | 0.511556081 | Neuroblasts |
| Cnot6l | Cnot6l | 2.35E-05 | 0.411327817 | 0.294 | 0.215 | 0.534846558 | Neuroblasts |
| Ubn2 | Ubn2 | 2.38E-05 | 0.277339178 | 0.677 | 0.612 | 0.541459754 | Neuroblasts |
| Memo1 | Memo1 | 2.43E-05 | 0.376221017 | 0.395 | 0.306 | 0.550810288 | Neuroblasts |
| Ptma | Ptma | 2.54E-05 | 0.331330505 | 0.389 | 0.304 | 0.577677734 | Neuroblasts |
| Ube2r2 | Ube2r2 | 2.75E-05 | 0.372480214 | 0.387 | 0.31 | 0.623802267 | Neuroblasts |
| Syncrip | Syncrip | 2.78E-05 | 0.450107601 | 0.286 | 0.209 | 0.632003414 | Neuroblasts |
| 4833420G17Rik | 4833420G17Rik | 2.80E-05 | 0.375613811 | 0.274 | 0.199 | 0.636442495 | Neuroblasts |
| Trim35 | Trim35 | 2.85E-05 | 0.41059945 | 0.255 | 0.177 | 0.646933661 | Neuroblasts |
| Clip1 | Clip1 | 3.03E-05 | 0.402216639 | 0.278 | 0.201 | 0.68904005 | Neuroblasts |
| Dcc | Dcc | 3.26E-05 | 0.495390369 | 0.679 | 0.618 | 0.739531973 | Neuroblasts |
| Wasf1 | Wasf1 | 3.44E-05 | 0.396813885 | 0.282 | 0.206 | 0.781308795 | Neuroblasts |
| Ccnh | Ccnh | 3.55E-05 | 0.367661088 | 0.263 | 0.187 | 0.805757699 | Neuroblasts |
| Rufy3 | Rufy3 | 3.60E-05 | 0.326299807 | 0.442 | 0.362 | 0.818779195 | Neuroblasts |
| Klhl24 | Klhl24 | 3.93E-05 | 0.347159032 | 0.28 | 0.201 | 0.892480836 | Neuroblasts |
| Paip2 | Paip2 | 4.15E-05 | 0.371844968 | 0.385 | 0.305 | 0.942750008 | Neuroblasts |
| Plxnc1 | Plxnc1 | 4.23E-05 | 0.287403184 | 0.253 | 0.171 | 0.959838925 | Neuroblasts |
| Ppp2r5e | Ppp2r5e | 4.38E-05 | 0.374592156 | 0.442 | 0.366 | 0.994485802 | Neuroblasts |
| Rnf38 | Rnf38 | 4.47E-05 | 0.374519239 | 0.356 | 0.28 | 1 | Neuroblasts |
| Rabgap1 | Rabgap1 | 4.53E-05 | 0.310229759 | 0.564 | 0.492 | 1 | Neuroblasts |
| Tmpo | Tmpo | 4.58E-05 | 0.30202855 | 0.272 | 0.19 | 1 | Neuroblasts |
| Scfd2 | Scfd2 | 5.62E-05 | 0.370139528 | 0.288 | 0.208 | 1 | Neuroblasts |
| Chd6 | Chd6 | 5.92E-05 | 0.279492294 | 0.582 | 0.513 | 1 | Neuroblasts |
| Gtf2ird1 | Gtf2ird1 | 5.98E-05 | 0.392226845 | 0.286 | 0.211 | 1 | Neuroblasts |
| Ranbp9 | Ranbp9 | 6.27E-05 | 0.389616667 | 0.412 | 0.34 | 1 | Neuroblasts |
| Cnot6 | Cnot6 | 6.75E-05 | 0.370214068 | 0.395 | 0.323 | 1 | Neuroblasts |
| Qser1 | Qser1 | 6.85E-05 | 0.334556642 | 0.267 | 0.192 | 1 | Neuroblasts |
| Pfkp | Pfkp | 7.22E-05 | 0.328145404 | 0.265 | 0.19 | 1 | Neuroblasts |
| Cdc42se2 | Cdc42se2 | 7.63E-05 | 0.315367582 | 0.327 | 0.25 | 1 | Neuroblasts |
| Epc1 | Epc1 | 7.73E-05 | 0.311545815 | 0.56 | 0.494 | 1 | Neuroblasts |
| Anapc5 | Anapc5 | 8.26E-05 | 0.342685003 | 0.253 | 0.18 | 1 | Neuroblasts |
| Klc1 | Klc1 | 8.49E-05 | 0.364078122 | 0.331 | 0.259 | 1 | Neuroblasts |
| Dhdds | Dhdds | 9.46E-05 | 0.334328461 | 0.261 | 0.186 | 1 | Neuroblasts |
| Pik3ca | Pik3ca | 9.46E-05 | 0.348167726 | 0.346 | 0.269 | 1 | Neuroblasts |
| Polb | Polb | 9.98E-05 | 0.351620969 | 0.317 | 0.241 | 1 | Neuroblasts |
| Jmjd1c | Jmjd1c | 0.000106335 | 0.253800806 | 0.658 | 0.627 | 1 | Neuroblasts |
| Gpcpd1 | Gpcpd1 | 0.000108939 | 0.424277804 | 0.424 | 0.37 | 1 | Neuroblasts |
| Zfp638 | Zfp638 | 0.000110904 | 0.318708129 | 0.599 | 0.551 | 1 | Neuroblasts |
| Arid2 | Arid2 | 0.000115871 | 0.312870648 | 0.467 | 0.398 | 1 | Neuroblasts |
| Tubb5 | Tubb5 | 0.000116047 | 0.386214659 | 0.263 | 0.197 | 1 | Neuroblasts |
| Snx29 | Snx29 | 0.000120476 | 0.352022366 | 0.354 | 0.284 | 1 | Neuroblasts |
| Atxn7l1 | Atxn7l1 | 0.000156091 | 0.392931865 | 0.305 | 0.231 | 1 | Neuroblasts |
| Sppl3 | Sppl3 | 0.000156708 | 0.284786571 | 0.393 | 0.31 | 1 | Neuroblasts |
| Asxl1 | Asxl1 | 0.000179941 | 0.336048198 | 0.379 | 0.309 | 1 | Neuroblasts |
| Grb2 | Grb2 | 0.000185835 | 0.286286513 | 0.29 | 0.217 | 1 | Neuroblasts |
| Gm43713 | Gm43713 | 0.000187142 | 0.343631355 | 0.305 | 0.239 | 1 | Neuroblasts |
| Rc3h1 | Rc3h1 | 0.000190562 | 0.388364133 | 0.372 | 0.307 | 1 | Neuroblasts |
| Slc35f1 | Slc35f1 | 0.000224241 | 0.52816673 | 0.475 | 0.415 | 1 | Neuroblasts |
| Zwint | Zwint | 0.000246348 | 0.343473922 | 0.405 | 0.347 | 1 | Neuroblasts |
| Wls1 | Wls | 0.000252082 | 0.400554263 | 0.298 | 0.234 | 1 | Neuroblasts |
| Usp9x | Usp9x | 0.000266086 | 0.338700762 | 0.471 | 0.408 | 1 | Neuroblasts |
| Fez1 | Fez1 | 0.000288276 | 0.344411219 | 0.305 | 0.233 | 1 | Neuroblasts |
| Tecr | Tecr | 0.000323738 | 0.295977173 | 0.36 | 0.292 | 1 | Neuroblasts |
| Sec63 | Sec63 | 0.000329421 | 0.314261971 | 0.391 | 0.326 | 1 | Neuroblasts |
| Gria1 | Gria1 | 0.000340848 | 0.267792803 | 0.449 | 0.389 | 1 | Neuroblasts |
| Bicd1 | Bicd1 | 0.000340883 | 0.302270276 | 0.496 | 0.446 | 1 | Neuroblasts |
| Samd12 | Samd12 | 0.000341258 | 0.53563678 | 0.274 | 0.214 | 1 | Neuroblasts |
| Fgf12 | Fgf12 | 0.000421871 | 0.908565362 | 0.356 | 0.316 | 1 | Neuroblasts |
| Nrg3 | Nrg3 | 0.000437141 | 0.600971393 | 0.496 | 0.459 | 1 | Neuroblasts |
| Cnot1 | Cnot1 | 0.000451299 | 0.301719301 | 0.356 | 0.288 | 1 | Neuroblasts |
| Gm9801 | Gm9801 | 0.00045678 | 0.290918531 | 0.261 | 0.196 | 1 | Neuroblasts |
| Mapk1 | Mapk1 | 0.000506803 | 0.275769026 | 0.502 | 0.441 | 1 | Neuroblasts |
| Brd1 | Brd1 | 0.00050947 | 0.370584109 | 0.29 | 0.228 | 1 | Neuroblasts |
| Gap43 | Gap43 | 0.000531142 | 0.363575452 | 0.267 | 0.203 | 1 | Neuroblasts |
| Zdhhc20 | Zdhhc20 | 0.000542084 | 0.316287578 | 0.389 | 0.321 | 1 | Neuroblasts |
| Smg6 | Smg6 | 0.000608159 | 0.307969664 | 0.551 | 0.498 | 1 | Neuroblasts |
| Kcnk10 | Kcnk10 | 0.000627782 | 0.377513121 | 0.305 | 0.239 | 1 | Neuroblasts |
| Ddx6 | Ddx6 | 0.000704671 | 0.297357012 | 0.409 | 0.349 | 1 | Neuroblasts |
| Gpatch8 | Gpatch8 | 0.00071241 | 0.250186786 | 0.658 | 0.631 | 1 | Neuroblasts |
| Nsg1 | Nsg1 | 0.000729727 | 0.308213248 | 0.325 | 0.256 | 1 | Neuroblasts |
| Kmt2e | Kmt2e | 0.000747143 | 0.293457552 | 0.578 | 0.557 | 1 | Neuroblasts |
| Cpsf6 | Cpsf6 | 0.000895751 | 0.305554824 | 0.42 | 0.359 | 1 | Neuroblasts |
| Eml5 | Eml5 | 0.000903714 | 0.406610363 | 0.377 | 0.315 | 1 | Neuroblasts |
| Zmym2 | Zmym2 | 0.00094147 | 0.263051569 | 0.43 | 0.367 | 1 | Neuroblasts |
| Rai1 | Rai1 | 0.001006283 | 0.311614492 | 0.331 | 0.267 | 1 | Neuroblasts |
| Ndfip1 | Ndfip1 | 0.00108203 | 0.309160067 | 0.257 | 0.198 | 1 | Neuroblasts |
| Ophn1 | Ophn1 | 0.001102583 | 0.402111372 | 0.335 | 0.282 | 1 | Neuroblasts |
| Camk2b | Camk2b | 0.001156533 | 0.280566887 | 0.35 | 0.282 | 1 | Neuroblasts |
| Kcnq5 | Kcnq5 | 0.001204836 | 0.323506488 | 0.65 | 0.619 | 1 | Neuroblasts |
| Zfp532 | Zfp532 | 0.001295383 | 0.37453342 | 0.479 | 0.434 | 1 | Neuroblasts |
| Arid1a | Arid1a | 0.001346859 | 0.284517392 | 0.498 | 0.452 | 1 | Neuroblasts |
| Syt11 | Syt11 | 0.001355243 | 0.260584977 | 0.564 | 0.528 | 1 | Neuroblasts |
| Herc1 | Herc1 | 0.001628792 | 0.257690238 | 0.529 | 0.499 | 1 | Neuroblasts |
| Csnk2a1 | Csnk2a1 | 0.00165395 | 0.295735366 | 0.261 | 0.203 | 1 | Neuroblasts |
| Smarca4 | Smarca4 | 0.00170377 | 0.25815552 | 0.298 | 0.237 | 1 | Neuroblasts |
| E130307A14Rik | E130307A14Rik | 0.001737639 | 0.25169522 | 0.447 | 0.384 | 1 | Neuroblasts |
| Galnt13 | Galnt13 | 0.001820333 | 0.326320504 | 0.364 | 0.312 | 1 | Neuroblasts |
| Casc4 | Casc4 | 0.001931342 | 0.318622187 | 0.319 | 0.259 | 1 | Neuroblasts |
| AW554918 | AW554918 | 0.001971934 | 0.302193563 | 0.407 | 0.353 | 1 | Neuroblasts |
| Ppp3cb | Ppp3cb | 0.002235675 | 0.331407254 | 0.35 | 0.296 | 1 | Neuroblasts |
| Kdm7a | Kdm7a | 0.002250145 | 0.251887453 | 0.253 | 0.197 | 1 | Neuroblasts |
| Ahi1 | Ahi1 | 0.002312834 | 0.341911838 | 0.516 | 0.49 | 1 | Neuroblasts |
| Rapgef2 | Rapgef2 | 0.002330198 | 0.259905215 | 0.416 | 0.363 | 1 | Neuroblasts |
| Ndfip2 | Ndfip2 | 0.002404369 | 0.318996023 | 0.257 | 0.203 | 1 | Neuroblasts |
| Picalm | Picalm | 0.002451734 | 0.324640439 | 0.389 | 0.343 | 1 | Neuroblasts |
| Adam10 | Adam10 | 0.0025762 | 0.329510761 | 0.311 | 0.258 | 1 | Neuroblasts |
| Ubxn7 | Ubxn7 | 0.002634148 | 0.322482757 | 0.261 | 0.209 | 1 | Neuroblasts |
| Glg1 | Glg1 | 0.00265339 | 0.281131681 | 0.409 | 0.357 | 1 | Neuroblasts |
| A230057D06Rik | A230057D06Rik | 0.00270541 | 0.314073158 | 0.267 | 0.212 | 1 | Neuroblasts |
| Rab2a | Rab2a | 0.002913263 | 0.273678765 | 0.414 | 0.368 | 1 | Neuroblasts |
| Nr6a1 | Nr6a1 | 0.003088666 | 0.32907687 | 0.337 | 0.277 | 1 | Neuroblasts |
| Zfp207 | Zfp207 | 0.003177378 | 0.308440121 | 0.327 | 0.28 | 1 | Neuroblasts |
| Eif4g2 | Eif4g2 | 0.003858194 | 0.324016738 | 0.28 | 0.232 | 1 | Neuroblasts |
| Fbxw7 | Fbxw7 | 0.003862753 | 0.274452082 | 0.274 | 0.222 | 1 | Neuroblasts |
| Tet3 | Tet3 | 0.004053727 | 0.347011664 | 0.358 | 0.324 | 1 | Neuroblasts |
| Shprh | Shprh | 0.004298539 | 0.272641177 | 0.286 | 0.231 | 1 | Neuroblasts |
| Slc25a4 | Slc25a4 | 0.004315399 | 0.260320044 | 0.331 | 0.284 | 1 | Neuroblasts |
| Cyld | Cyld | 0.004750133 | 0.264382147 | 0.352 | 0.298 | 1 | Neuroblasts |
| Gria3 | Gria3 | 0.005241145 | 0.385590349 | 0.288 | 0.246 | 1 | Neuroblasts |
| Pcsk2 | Pcsk2 | 0.005868418 | 0.35184625 | 0.296 | 0.257 | 1 | Neuroblasts |
| Scai | Scai | 0.006283959 | 0.274085388 | 0.354 | 0.307 | 1 | Neuroblasts |
| Klhdc10 | Klhdc10 | 0.006551988 | 0.310574913 | 0.387 | 0.343 | 1 | Neuroblasts |
| Cacna2d3 | Cacna2d3 | 0.006802244 | 0.314192393 | 0.5 | 0.485 | 1 | Neuroblasts |
| Yes1 | Yes1 | 0.007480731 | 0.276196236 | 0.257 | 0.205 | 1 | Neuroblasts |
| Ube2g1 | Ube2g1 | 0.008742954 | 0.283299759 | 0.366 | 0.321 | 1 | Neuroblasts |
| Mprip | Mprip | 0.009748536 | 0.254473368 | 0.368 | 0.322 | 1 | Neuroblasts |
| Adamts18 | Adamts18 | 8.19E-146 | 2.542616117 | 0.491 | 0.034 | 1.86E-141 | early aNSC |
| Csmd1 | Csmd1 | 7.27E-110 | 1.605759286 | 0.974 | 0.757 | 1.65E-105 | early aNSC |
| Ccdc170 | Ccdc170 | 9.95E-100 | 1.521115936 | 0.304 | 0.012 | 2.26E-95 | early aNSC |
| Cfap44 | Cfap44 | 1.28E-98 | 1.456348748 | 0.35 | 0.025 | 2.90E-94 | early aNSC |
| Scml4 | Scml4 | 4.52E-96 | 1.568844191 | 0.353 | 0.028 | 1.03E-91 | early aNSC |
| Malat1 | Malat1 | 1.31E-87 | 0.580942222 | 1 | 1 | 2.97E-83 | early aNSC |
| Veph1 | Veph1 | 4.26E-85 | 1.30182708 | 0.263 | 0.01 | 9.68E-81 | early aNSC |
| Adgrv1 | Adgrv1 | 1.51E-78 | 1.527037613 | 0.45 | 0.082 | 3.42E-74 | early aNSC |
| Spag16 | Spag16 | 3.59E-67 | 1.66051648 | 0.419 | 0.086 | 8.16E-63 | early aNSC |
| Nkain2 | Nkain2 | 8.17E-67 | 1.230045707 | 0.957 | 0.819 | 1.86E-62 | early aNSC |
| Armc2 | Armc2 | 6.75E-66 | 1.454878534 | 0.422 | 0.093 | 1.53E-61 | early aNSC |
| Bmper | Bmper | 4.32E-65 | 1.467639694 | 0.568 | 0.183 | 9.80E-61 | early aNSC |
| Pawr | Pawr | 4.78E-61 | 1.184007864 | 0.286 | 0.035 | 1.09E-56 | early aNSC |
| Ldb2 | Ldb2 | 2.72E-53 | 1.380589499 | 0.504 | 0.17 | 6.18E-49 | early aNSC |
| Hmgcs2 | Hmgcs2 | 8.59E-52 | 1.159227351 | 0.307 | 0.056 | 1.95E-47 | early aNSC |
| Zbtb20 | Zbtb20 | 9.79E-50 | 0.527141144 | 1 | 0.994 | 2.22E-45 | early aNSC |
| Sik31 | Sik3 | 3.28E-49 | 0.99391425 | 0.926 | 0.721 | 7.45E-45 | early aNSC |
| Raver21 | Raver2 | 3.81E-49 | 1.242501763 | 0.596 | 0.261 | 8.64E-45 | early aNSC |
| Nrg1 | Nrg1 | 7.00E-49 | 1.930157587 | 0.854 | 0.693 | 1.59E-44 | early aNSC |
| Msi21 | Msi2 | 4.41E-48 | 0.66424137 | 1 | 0.946 | 1.00E-43 | early aNSC |
| Vit | Vit | 7.56E-48 | 1.176250398 | 0.368 | 0.094 | 1.72E-43 | early aNSC |
| Dtna1 | Dtna | 4.11E-44 | 0.755863505 | 0.977 | 0.754 | 9.34E-40 | early aNSC |
| Fars21 | Fars2 | 1.70E-41 | 0.976732462 | 0.864 | 0.636 | 3.87E-37 | early aNSC |
| Gm9731 | Gm973 | 5.56E-41 | 1.024147055 | 0.749 | 0.436 | 1.26E-36 | early aNSC |
| Celsr1 | Celsr1 | 1.30E-40 | 0.968441641 | 0.292 | 0.066 | 2.96E-36 | early aNSC |
| Gramd1c | Gramd1c | 2.36E-40 | 1.015767505 | 0.292 | 0.067 | 5.36E-36 | early aNSC |
| Dkk31 | Dkk3 | 3.10E-40 | 1.087603055 | 0.565 | 0.259 | 7.05E-36 | early aNSC |
| Hdac9 | Hdac9 | 4.24E-39 | 0.926813462 | 0.852 | 0.642 | 9.64E-35 | early aNSC |
| Slc35d1 | Slc35d1 | 1.17E-36 | 1.168610962 | 0.465 | 0.194 | 2.65E-32 | early aNSC |
| Cpe1 | Cpe | 1.65E-36 | 0.743204875 | 0.951 | 0.869 | 3.75E-32 | early aNSC |
| Cmya5 | Cmya5 | 6.96E-36 | 1.203595777 | 0.261 | 0.06 | 1.58E-31 | early aNSC |
| Sema6a | Sema6a | 3.75E-34 | 1.041936287 | 0.547 | 0.273 | 8.52E-30 | early aNSC |
| 4930578G10Rik | 4930578G10Rik | 2.76E-33 | 1.071693749 | 0.616 | 0.342 | 6.26E-29 | early aNSC |
| Agbl4 | Agbl4 | 5.04E-32 | 1.214536377 | 0.563 | 0.302 | 1.15E-27 | early aNSC |
| Tmem132b | Tmem132b | 8.17E-31 | 1.063644736 | 0.394 | 0.154 | 1.86E-26 | early aNSC |
| Myo1e | Myo1e | 1.29E-30 | 1.008560584 | 0.389 | 0.153 | 2.93E-26 | early aNSC |
| Pacrg | Pacrg | 1.40E-30 | 1.181999015 | 0.591 | 0.347 | 3.19E-26 | early aNSC |
| Prr16 | Prr16 | 1.95E-30 | 1.282160765 | 0.384 | 0.149 | 4.44E-26 | early aNSC |
| Pard3b1 | Pard3b | 2.24E-30 | 0.814817095 | 0.795 | 0.544 | 5.10E-26 | early aNSC |
| Ccdc114 | Ccdc114 | 2.72E-30 | 0.956485918 | 0.279 | 0.082 | 6.19E-26 | early aNSC |
| Iqck | Iqck | 3.70E-30 | 1.003705289 | 0.33 | 0.113 | 8.40E-26 | early aNSC |
| 9530026P05Rik | 9530026P05Rik | 2.04E-29 | 1.067583988 | 0.412 | 0.169 | 4.64E-25 | early aNSC |
| Lrrc9 | Lrrc9 | 2.26E-29 | 1.027355912 | 0.379 | 0.154 | 5.13E-25 | early aNSC |
| Igfbp5 | Igfbp5 | 6.28E-29 | 1.078459319 | 0.366 | 0.141 | 1.43E-24 | early aNSC |
| Plch1 | Plch1 | 1.17E-28 | 1.052022573 | 0.345 | 0.13 | 2.66E-24 | early aNSC |
| Kif21a | Kif21a | 6.85E-28 | 0.842411404 | 0.706 | 0.485 | 1.56E-23 | early aNSC |
| Gfra11 | Gfra1 | 1.72E-27 | 0.974343166 | 0.583 | 0.332 | 3.91E-23 | early aNSC |
| Synpo2 | Synpo2 | 5.17E-27 | 0.934110624 | 0.276 | 0.086 | 1.17E-22 | early aNSC |
| Rgs201 | Rgs20 | 5.46E-27 | 0.638083593 | 0.951 | 0.744 | 1.24E-22 | early aNSC |
| Intu | Intu | 1.33E-26 | 0.84879893 | 0.274 | 0.087 | 3.02E-22 | early aNSC |
| Plpp31 | Plpp3 | 1.90E-26 | 0.641669241 | 0.91 | 0.693 | 4.33E-22 | early aNSC |
| A330093E20Rik | A330093E20Rik | 4.06E-26 | 1.148630657 | 0.335 | 0.13 | 9.23E-22 | early aNSC |
| Epb41l4b | Epb41l4b | 1.71E-25 | 0.87116026 | 0.258 | 0.081 | 3.89E-21 | early aNSC |
| Slc35f11 | Slc35f1 | 3.91E-25 | 0.745542292 | 0.632 | 0.383 | 8.87E-21 | early aNSC |
| Tnfrsf191 | Tnfrsf19 | 8.29E-25 | 1.037205028 | 0.512 | 0.29 | 1.88E-20 | early aNSC |
| Slc22a23 | Slc22a23 | 3.49E-24 | 0.903487073 | 0.542 | 0.321 | 7.94E-20 | early aNSC |
| Gm2163 | Gm2163 | 9.55E-24 | 0.820124476 | 0.547 | 0.316 | 2.17E-19 | early aNSC |
| Dab11 | Dab1 | 3.86E-23 | 0.620287111 | 0.795 | 0.581 | 8.77E-19 | early aNSC |
| Pitpnc1 | Pitpnc1 | 7.65E-23 | 0.445046331 | 0.946 | 0.792 | 1.74E-18 | early aNSC |
| Ephb11 | Ephb1 | 1.27E-22 | 0.806816962 | 0.639 | 0.414 | 2.89E-18 | early aNSC |
| Dapp1 | Dapp1 | 1.55E-22 | 0.843145362 | 0.327 | 0.134 | 3.52E-18 | early aNSC |
| Hmgcll1 | Hmgcll1 | 2.66E-22 | 0.875051932 | 0.286 | 0.106 | 6.04E-18 | early aNSC |
| Gpm6b1 | Gpm6b | 6.51E-22 | 0.541684351 | 0.972 | 0.907 | 1.48E-17 | early aNSC |
| Cfap46 | Cfap46 | 9.05E-22 | 0.781796733 | 0.258 | 0.091 | 2.05E-17 | early aNSC |
| Dcc1 | Dcc | 1.08E-21 | 0.764164011 | 0.739 | 0.608 | 2.46E-17 | early aNSC |
| Ntrk2 | Ntrk2 | 3.57E-21 | 0.642590961 | 0.875 | 0.73 | 8.11E-17 | early aNSC |
| Psd3 | Psd3 | 7.88E-21 | 0.735186485 | 0.729 | 0.572 | 1.79E-16 | early aNSC |
| Dennd1a1 | Dennd1a | 1.45E-20 | 0.532170072 | 0.88 | 0.755 | 3.30E-16 | early aNSC |
| Atxn1 | Atxn1 | 1.53E-20 | 0.673612583 | 0.742 | 0.603 | 3.48E-16 | early aNSC |
| Dok51 | Dok5 | 4.80E-20 | 0.823818615 | 0.345 | 0.16 | 1.09E-15 | early aNSC |
| Prdm161 | Prdm16 | 1.24E-19 | 0.717067299 | 0.665 | 0.477 | 2.82E-15 | early aNSC |
| Arap21 | Arap2 | 1.82E-19 | 0.650257596 | 0.634 | 0.418 | 4.15E-15 | early aNSC |
| Apoe1 | Apoe | 2.37E-19 | 0.491908257 | 0.926 | 0.775 | 5.38E-15 | early aNSC |
| Cep112 | Cep112 | 4.01E-19 | 0.815131495 | 0.391 | 0.196 | 9.11E-15 | early aNSC |
| CT025619.2 | CT025619.2 | 9.85E-19 | 0.700896984 | 0.739 | 0.636 | 2.24E-14 | early aNSC |
| Meg31 | Meg3 | 1.99E-18 | 0.327880702 | 0.954 | 0.901 | 4.52E-14 | early aNSC |
| Zhx2 | Zhx2 | 9.42E-18 | 0.759646328 | 0.558 | 0.371 | 2.14E-13 | early aNSC |
| Mid11 | Mid1 | 9.93E-18 | 0.818260437 | 0.542 | 0.355 | 2.25E-13 | early aNSC |
| Dpyd | Dpyd | 2.08E-17 | 0.865021424 | 0.491 | 0.307 | 4.73E-13 | early aNSC |
| Sybu1 | Sybu | 3.59E-17 | 0.693359181 | 0.616 | 0.437 | 8.15E-13 | early aNSC |
| Ttc8 | Ttc8 | 3.83E-17 | 0.760411313 | 0.389 | 0.212 | 8.69E-13 | early aNSC |
| Fam134b | Fam134b | 3.87E-17 | 0.744432426 | 0.394 | 0.215 | 8.78E-13 | early aNSC |
| Eda1 | Eda | 6.74E-17 | 0.817400376 | 0.586 | 0.394 | 1.53E-12 | early aNSC |
| Sumo1 | Sumo1 | 2.22E-16 | 0.689612031 | 0.609 | 0.442 | 5.05E-12 | early aNSC |
| Notch2 | Notch2 | 2.32E-16 | 0.753315213 | 0.394 | 0.222 | 5.27E-12 | early aNSC |
| Frmd4a1 | Frmd4a | 5.16E-16 | 0.406522467 | 0.967 | 0.835 | 1.17E-11 | early aNSC |
| Mgat51 | Mgat5 | 1.63E-15 | 0.697312431 | 0.693 | 0.558 | 3.71E-11 | early aNSC |
| Zfhx4 | Zfhx4 | 2.05E-15 | 0.681814073 | 0.488 | 0.298 | 4.66E-11 | early aNSC |
| Wwox | Wwox | 2.14E-15 | 0.688367439 | 0.668 | 0.514 | 4.86E-11 | early aNSC |
| Epha5 | Epha5 | 9.76E-15 | 0.56179588 | 0.473 | 0.3 | 2.22E-10 | early aNSC |
| Sugct1 | Sugct | 1.35E-14 | 0.761841723 | 0.448 | 0.278 | 3.08E-10 | early aNSC |
| Slc38a11 | Slc38a1 | 1.54E-14 | 0.99348954 | 0.384 | 0.226 | 3.50E-10 | early aNSC |
| Zfp36l1 | Zfp36l1 | 1.92E-14 | 0.631844506 | 0.312 | 0.159 | 4.36E-10 | early aNSC |
| Ppp2r2b1 | Ppp2r2b | 2.04E-14 | 0.506072797 | 0.836 | 0.666 | 4.62E-10 | early aNSC |
| Mir670hg | Mir670hg | 4.50E-14 | 0.732052639 | 0.286 | 0.138 | 1.02E-09 | early aNSC |
| Nxn1 | Nxn | 5.10E-14 | 0.720926516 | 0.609 | 0.457 | 1.16E-09 | early aNSC |
| Rfx3 | Rfx3 | 6.17E-14 | 0.507740306 | 0.798 | 0.722 | 1.40E-09 | early aNSC |
| Ddo | Ddo | 8.33E-14 | 0.70841527 | 0.427 | 0.26 | 1.89E-09 | early aNSC |
| Prrx11 | Prrx1 | 1.04E-13 | 0.685865291 | 0.453 | 0.286 | 2.36E-09 | early aNSC |
| Nckap51 | Nckap5 | 1.27E-13 | 0.424022823 | 0.79 | 0.594 | 2.88E-09 | early aNSC |
| Sfxn51 | Sfxn5 | 1.40E-13 | 0.420716014 | 0.806 | 0.6 | 3.19E-09 | early aNSC |
| Lama21 | Lama2 | 1.42E-13 | 0.498446455 | 0.76 | 0.554 | 3.23E-09 | early aNSC |
| Akt3 | Akt3 | 1.73E-13 | 0.421452069 | 0.87 | 0.773 | 3.93E-09 | early aNSC |
| Gldc1 | Gldc | 3.10E-13 | 0.660258622 | 0.488 | 0.311 | 7.04E-09 | early aNSC |
| Foxo11 | Foxo1 | 3.96E-13 | 0.693301646 | 0.519 | 0.365 | 8.99E-09 | early aNSC |
| Nr3c21 | Nr3c2 | 4.13E-13 | 0.525529558 | 0.711 | 0.539 | 9.37E-09 | early aNSC |
| Sox5 | Sox5 | 5.72E-13 | 0.421886208 | 0.831 | 0.693 | 1.30E-08 | early aNSC |
| Gabrg3 | Gabrg3 | 8.14E-13 | 0.705981487 | 0.593 | 0.459 | 1.85E-08 | early aNSC |
| Plce1 | Plce1 | 1.22E-12 | 0.455989848 | 0.568 | 0.384 | 2.77E-08 | early aNSC |
| Plekhm3 | Plekhm3 | 1.41E-12 | 0.765299897 | 0.465 | 0.326 | 3.19E-08 | early aNSC |
| Bcl21 | Bcl2 | 1.56E-12 | 0.56223115 | 0.614 | 0.463 | 3.55E-08 | early aNSC |
| Ccnd31 | Ccnd3 | 2.22E-12 | 0.74380786 | 0.402 | 0.25 | 5.04E-08 | early aNSC |
| Wwtr11 | Wwtr1 | 2.34E-12 | 0.643124629 | 0.425 | 0.272 | 5.31E-08 | early aNSC |
| Ccdc191 | Ccdc191 | 2.38E-12 | 0.610779419 | 0.304 | 0.165 | 5.41E-08 | early aNSC |
| Cst31 | Cst3 | 4.21E-12 | 0.401632589 | 0.801 | 0.702 | 9.56E-08 | early aNSC |
| Cspp1 | Cspp1 | 5.38E-12 | 0.598464911 | 0.581 | 0.457 | 1.22E-07 | early aNSC |
| Pou2f1 | Pou2f1 | 5.75E-12 | 0.47148972 | 0.783 | 0.666 | 1.31E-07 | early aNSC |
| Zfpm21 | Zfpm2 | 6.99E-12 | 0.539788711 | 0.749 | 0.622 | 1.59E-07 | early aNSC |
| Lrp41 | Lrp4 | 8.38E-12 | 0.617657916 | 0.32 | 0.182 | 1.90E-07 | early aNSC |
| Pdzrn3 | Pdzrn3 | 1.11E-11 | 0.705503575 | 0.263 | 0.132 | 2.53E-07 | early aNSC |
| Gm12394 | Gm12394 | 1.76E-11 | 0.606532616 | 0.307 | 0.172 | 3.99E-07 | early aNSC |
| Cacnb2 | Cacnb2 | 2.33E-11 | 0.49922848 | 0.578 | 0.428 | 5.28E-07 | early aNSC |
| Immp2l | Immp2l | 2.33E-11 | 0.79973391 | 0.45 | 0.308 | 5.29E-07 | early aNSC |
| Ptprt1 | Ptprt | 2.71E-11 | 0.370899181 | 0.931 | 0.713 | 6.15E-07 | early aNSC |
| Peli2 | Peli2 | 3.40E-11 | 0.603205843 | 0.56 | 0.421 | 7.73E-07 | early aNSC |
| RF019621 | RF01962 | 3.59E-11 | 0.469086343 | 0.629 | 0.449 | 8.16E-07 | early aNSC |
| Grid21 | Grid2 | 3.79E-11 | 0.364441647 | 0.946 | 0.844 | 8.60E-07 | early aNSC |
| Thap3 | Thap3 | 7.32E-11 | 0.54919193 | 0.266 | 0.141 | 1.66E-06 | early aNSC |
| Nlgn11 | Nlgn1 | 8.68E-11 | 0.313383951 | 0.982 | 0.936 | 1.97E-06 | early aNSC |
| Slc6a61 | Slc6a6 | 9.73E-11 | 0.715898033 | 0.327 | 0.198 | 2.21E-06 | early aNSC |
| Slco1c11 | Slco1c1 | 1.17E-10 | 0.440394576 | 0.611 | 0.446 | 2.65E-06 | early aNSC |
| Eps151 | Eps15 | 1.44E-10 | 0.537126271 | 0.65 | 0.516 | 3.28E-06 | early aNSC |
| Dgki | Dgki | 1.67E-10 | 0.577575533 | 0.57 | 0.47 | 3.79E-06 | early aNSC |
| Stox21 | Stox2 | 2.10E-10 | 0.373621431 | 0.862 | 0.789 | 4.77E-06 | early aNSC |
| Gm14964 | Gm14964 | 2.28E-10 | 0.666196513 | 0.389 | 0.263 | 5.17E-06 | early aNSC |
| Epb41l5 | Epb41l5 | 2.57E-10 | 0.561870818 | 0.425 | 0.286 | 5.85E-06 | early aNSC |
| Clip4 | Clip4 | 2.57E-10 | 0.531436547 | 0.292 | 0.165 | 5.85E-06 | early aNSC |
| Ccdc148 | Ccdc148 | 2.67E-10 | 0.595577855 | 0.251 | 0.134 | 6.06E-06 | early aNSC |
| Pdzd2 | Pdzd2 | 3.52E-10 | 0.613657712 | 0.269 | 0.149 | 8.00E-06 | early aNSC |
| Nipsnap2 | Nipsnap2 | 4.59E-10 | 0.533543419 | 0.322 | 0.194 | 1.04E-05 | early aNSC |
| Slit2 | Slit2 | 7.03E-10 | 0.946190276 | 0.368 | 0.237 | 1.60E-05 | early aNSC |
| Ugp21 | Ugp2 | 7.45E-10 | 0.574122688 | 0.532 | 0.403 | 1.69E-05 | early aNSC |
| Trps11 | Trps1 | 7.85E-10 | 0.320047237 | 0.908 | 0.769 | 1.78E-05 | early aNSC |
| Tcf7l21 | Tcf7l2 | 8.15E-10 | 0.420987716 | 0.645 | 0.489 | 1.85E-05 | early aNSC |
| Ssbp2 | Ssbp2 | 8.43E-10 | 0.465000299 | 0.739 | 0.654 | 1.91E-05 | early aNSC |
| B3galt11 | B3galt1 | 9.90E-10 | 0.409751129 | 0.941 | 0.884 | 2.25E-05 | early aNSC |
| 1110051M20Rik | 1110051M20Rik | 1.18E-09 | 0.54404234 | 0.596 | 0.481 | 2.68E-05 | early aNSC |
| Ttc28 | Ttc28 | 1.62E-09 | 0.503945455 | 0.68 | 0.567 | 3.68E-05 | early aNSC |
| Rpgr | Rpgr | 1.71E-09 | 0.543208026 | 0.271 | 0.154 | 3.89E-05 | early aNSC |
| Srsf5 | Srsf5 | 1.82E-09 | 0.541785551 | 0.483 | 0.369 | 4.13E-05 | early aNSC |
| Pitpnm2 | Pitpnm2 | 2.37E-09 | 0.528019231 | 0.366 | 0.235 | 5.39E-05 | early aNSC |
| Bcar31 | Bcar3 | 2.72E-09 | 0.593342815 | 0.379 | 0.252 | 6.19E-05 | early aNSC |
| Mxi1 | Mxi1 | 2.82E-09 | 0.545946426 | 0.55 | 0.436 | 6.40E-05 | early aNSC |
| Slc1a31 | Slc1a3 | 4.27E-09 | 0.316775046 | 0.91 | 0.731 | 9.70E-05 | early aNSC |
| Tox1 | Tox | 5.66E-09 | 0.560675614 | 0.604 | 0.496 | 0.000128469 | early aNSC |
| Tenm31 | Tenm3 | 5.84E-09 | 0.323163545 | 0.808 | 0.703 | 0.000132547 | early aNSC |
| Id4 | Id4 | 6.82E-09 | 0.567387347 | 0.465 | 0.344 | 0.000154942 | early aNSC |
| Lncpint1 | Lncpint | 7.96E-09 | 0.41666821 | 0.719 | 0.611 | 0.000180756 | early aNSC |
| Prex21 | Prex2 | 8.62E-09 | 0.312670296 | 0.88 | 0.642 | 0.000195801 | early aNSC |
| Alcam1 | Alcam | 9.64E-09 | 0.416724445 | 0.739 | 0.641 | 0.000219051 | early aNSC |
| Cdc14a | Cdc14a | 1.02E-08 | 0.636167845 | 0.34 | 0.227 | 0.000231856 | early aNSC |
| Plekha71 | Plekha7 | 1.05E-08 | 0.511011251 | 0.304 | 0.184 | 0.000238774 | early aNSC |
| Sox6 | Sox6 | 1.22E-08 | 0.281383661 | 0.857 | 0.718 | 0.000278119 | early aNSC |
| Adamts61 | Adamts6 | 1.64E-08 | 0.519260011 | 0.315 | 0.195 | 0.000371892 | early aNSC |
| Sirpa | Sirpa | 1.67E-08 | 0.514510594 | 0.422 | 0.302 | 0.000379457 | early aNSC |
| Rora1 | Rora | 2.39E-08 | 0.295167475 | 0.992 | 0.855 | 0.000543366 | early aNSC |
| Acss11 | Acss1 | 2.79E-08 | 0.393151335 | 0.552 | 0.419 | 0.00063398 | early aNSC |
| Tle1 | Tle1 | 3.27E-08 | 0.4865645 | 0.453 | 0.333 | 0.000741882 | early aNSC |
| Pcgf5 | Pcgf5 | 3.46E-08 | 0.567382355 | 0.391 | 0.272 | 0.000786371 | early aNSC |
| Iqsec11 | Iqsec1 | 4.15E-08 | 0.453345568 | 0.358 | 0.239 | 0.000943043 | early aNSC |
| Abca11 | Abca1 | 5.67E-08 | 0.437798656 | 0.542 | 0.42 | 0.00128693 | early aNSC |
| Acsl31 | Acsl3 | 5.71E-08 | 0.363540377 | 0.683 | 0.544 | 0.001297376 | early aNSC |
| Epb41l21 | Epb41l2 | 6.75E-08 | 0.465912351 | 0.458 | 0.339 | 0.001532705 | early aNSC |
| Hivep31 | Hivep3 | 7.71E-08 | 0.335325423 | 0.721 | 0.612 | 0.001751744 | early aNSC |
| Gm16168 | Gm16168 | 7.90E-08 | 0.488933748 | 0.281 | 0.171 | 0.001795058 | early aNSC |
| 9430041J12Rik1 | 9430041J12Rik | 8.25E-08 | 0.52564047 | 0.389 | 0.271 | 0.001874728 | early aNSC |
| Bbx | Bbx | 8.38E-08 | 0.532068033 | 0.389 | 0.279 | 0.001903834 | early aNSC |
| Lhfp | Lhfp | 9.02E-08 | 0.476304297 | 0.455 | 0.329 | 0.002047808 | early aNSC |
| Ino80dos | Ino80dos | 9.38E-08 | 0.544836183 | 0.396 | 0.288 | 0.002129735 | early aNSC |
| Sesn3 | Sesn3 | 1.10E-07 | 0.534143919 | 0.496 | 0.399 | 0.002490845 | early aNSC |
| Lztfl1 | Lztfl1 | 1.13E-07 | 0.43145261 | 0.256 | 0.152 | 0.002573452 | early aNSC |
| Cntln | Cntln | 1.21E-07 | 0.52779332 | 0.286 | 0.18 | 0.00275499 | early aNSC |
| Ap3s1 | Ap3s1 | 1.22E-07 | 0.43181737 | 0.361 | 0.248 | 0.002777514 | early aNSC |
| Cd9 | Cd9 | 1.23E-07 | 0.449977251 | 0.261 | 0.156 | 0.00280377 | early aNSC |
| Pak1 | Pak1 | 1.64E-07 | 0.533052703 | 0.409 | 0.304 | 0.00373615 | early aNSC |
| Wnk21 | Wnk2 | 2.20E-07 | 0.442485931 | 0.593 | 0.492 | 0.005006109 | early aNSC |
| Mmp16 | Mmp16 | 2.68E-07 | 0.486662113 | 0.448 | 0.341 | 0.006085306 | early aNSC |
| Rtn11 | Rtn1 | 2.77E-07 | 0.357705637 | 0.729 | 0.689 | 0.006302669 | early aNSC |
| Por | Por | 3.23E-07 | 0.472674245 | 0.263 | 0.165 | 0.007343497 | early aNSC |
| Gab1 | Gab1 | 3.88E-07 | 0.441775682 | 0.453 | 0.34 | 0.008814294 | early aNSC |
| Chic1 | Chic1 | 4.26E-07 | 0.501157711 | 0.284 | 0.184 | 0.009675214 | early aNSC |
| Mcc1 | Mcc | 4.55E-07 | 0.417719246 | 0.506 | 0.392 | 0.010330191 | early aNSC |
| Ddah11 | Ddah1 | 4.60E-07 | 0.426917989 | 0.537 | 0.429 | 0.010442594 | early aNSC |
| Wdpcp | Wdpcp | 4.65E-07 | 0.540745842 | 0.35 | 0.245 | 0.010558395 | early aNSC |
| Plxnc11 | Plxnc1 | 7.06E-07 | 0.487225417 | 0.271 | 0.172 | 0.016029189 | early aNSC |
| Tcf7l11 | Tcf7l1 | 8.85E-07 | 0.431771786 | 0.399 | 0.284 | 0.02010239 | early aNSC |
| Ttll5 | Ttll5 | 9.05E-07 | 0.461378295 | 0.32 | 0.216 | 0.020560757 | early aNSC |
| Lgi41 | Lgi4 | 9.80E-07 | 0.462566955 | 0.253 | 0.158 | 0.022267678 | early aNSC |
| Ammecr1l | Ammecr1l | 1.02E-06 | 0.473323606 | 0.304 | 0.204 | 0.023159577 | early aNSC |
| Ano3 | Ano3 | 1.05E-06 | 0.534424991 | 0.345 | 0.248 | 0.023858665 | early aNSC |
| Slc2a13 | Slc2a13 | 1.11E-06 | 0.550429002 | 0.297 | 0.203 | 0.025203592 | early aNSC |
| Sorbs1 | Sorbs1 | 1.24E-06 | 0.344595648 | 0.734 | 0.686 | 0.02820118 | early aNSC |
| Dync2h1 | Dync2h1 | 1.60E-06 | 0.464296197 | 0.427 | 0.338 | 0.036358358 | early aNSC |
| Galnt16 | Galnt16 | 1.61E-06 | 0.44017017 | 0.317 | 0.219 | 0.036671069 | early aNSC |
| Atp1b1 | Atp1b1 | 1.68E-06 | 0.374513029 | 0.703 | 0.643 | 0.038183961 | early aNSC |
| Med12l1 | Med12l | 1.90E-06 | 0.416228614 | 0.468 | 0.361 | 0.043243209 | early aNSC |
| Cc2d2a | Cc2d2a | 1.95E-06 | 0.48917584 | 0.338 | 0.245 | 0.044373382 | early aNSC |
| Tmem2431 | Tmem243 | 2.16E-06 | 0.463370578 | 0.409 | 0.311 | 0.049021901 | early aNSC |
| Tbc1d32 | Tbc1d32 | 2.20E-06 | 0.463672428 | 0.258 | 0.168 | 0.04995956 | early aNSC |
| Daam1 | Daam1 | 2.62E-06 | 0.382848917 | 0.558 | 0.47 | 0.059513251 | early aNSC |
| Crebrf | Crebrf | 3.11E-06 | 0.447641899 | 0.437 | 0.349 | 0.070557092 | early aNSC |
| Cpd | Cpd | 3.48E-06 | 0.480414499 | 0.294 | 0.205 | 0.079144558 | early aNSC |
| Nr1d21 | Nr1d2 | 3.71E-06 | 0.396388722 | 0.396 | 0.296 | 0.084252717 | early aNSC |
| Ralgps2 | Ralgps2 | 3.87E-06 | 0.508176591 | 0.35 | 0.259 | 0.087932595 | early aNSC |
| Stk3 | Stk3 | 4.38E-06 | 0.474904168 | 0.391 | 0.298 | 0.099494647 | early aNSC |
| Setd7 | Setd7 | 4.87E-06 | 0.428371615 | 0.376 | 0.276 | 0.110641232 | early aNSC |
| Evi5 | Evi5 | 4.94E-06 | 0.462659822 | 0.361 | 0.274 | 0.112151101 | early aNSC |
| Park21 | Park2 | 4.95E-06 | 0.357504754 | 0.685 | 0.628 | 0.112530285 | early aNSC |
| Gm281751 | Gm28175 | 5.15E-06 | 0.497198193 | 0.279 | 0.19 | 0.116917999 | early aNSC |
| Gja11 | Gja1 | 5.44E-06 | 0.420533404 | 0.442 | 0.347 | 0.123456977 | early aNSC |
| Unc80 | Unc80 | 6.03E-06 | 0.406313351 | 0.299 | 0.21 | 0.137054144 | early aNSC |
| Ston21 | Ston2 | 6.23E-06 | 0.37241491 | 0.488 | 0.387 | 0.141520175 | early aNSC |
| Arhgef41 | Arhgef4 | 6.64E-06 | 0.335951516 | 0.55 | 0.448 | 0.150883549 | early aNSC |
| Nrbp2 | Nrbp2 | 9.18E-06 | 0.43796653 | 0.284 | 0.197 | 0.208432034 | early aNSC |
| Crtc31 | Crtc3 | 9.70E-06 | 0.381170492 | 0.514 | 0.436 | 0.22021145 | early aNSC |
| Bclaf1 | Bclaf1 | 1.05E-05 | 0.387913917 | 0.545 | 0.471 | 0.238772962 | early aNSC |
| Fam208a | Fam208a | 1.14E-05 | 0.385275909 | 0.422 | 0.336 | 0.259909871 | early aNSC |
| Adhfe11 | Adhfe1 | 1.21E-05 | 0.380184148 | 0.315 | 0.222 | 0.274953876 | early aNSC |
| Fchsd2 | Fchsd2 | 1.30E-05 | 0.32465628 | 0.683 | 0.613 | 0.294312838 | early aNSC |
| Macrod1 | Macrod1 | 1.46E-05 | 0.433262319 | 0.299 | 0.211 | 0.332678298 | early aNSC |
| Klf13 | Klf13 | 1.51E-05 | 0.383807157 | 0.253 | 0.168 | 0.34342601 | early aNSC |
| Rfx41 | Rfx4 | 1.62E-05 | 0.363726686 | 0.55 | 0.448 | 0.367526851 | early aNSC |
| Hepacam1 | Hepacam | 1.66E-05 | 0.289067267 | 0.563 | 0.444 | 0.377458491 | early aNSC |
| Rasal2 | Rasal2 | 1.81E-05 | 0.348664684 | 0.532 | 0.447 | 0.409987997 | early aNSC |
| Itm2c | Itm2c | 1.99E-05 | 0.353419107 | 0.55 | 0.479 | 0.452284879 | early aNSC |
| Aig1 | Aig1 | 2.28E-05 | 0.427280754 | 0.317 | 0.234 | 0.518388292 | early aNSC |
| Aldh7a11 | Aldh7a1 | 2.43E-05 | 0.347261203 | 0.284 | 0.194 | 0.552855622 | early aNSC |
| 2610035D17Rik1 | 2610035D17Rik | 3.47E-05 | 0.297433935 | 0.519 | 0.424 | 0.788581875 | early aNSC |
| Prdx61 | Prdx6 | 3.78E-05 | 0.398752044 | 0.491 | 0.413 | 0.858713608 | early aNSC |
| Svil | Svil | 4.16E-05 | 0.414179773 | 0.253 | 0.175 | 0.945473952 | early aNSC |
| Ankrd12 | Ankrd12 | 4.63E-05 | 0.340649813 | 0.586 | 0.536 | 1 | early aNSC |
| Trak11 | Trak1 | 4.75E-05 | 0.330063508 | 0.442 | 0.361 | 1 | early aNSC |
| Palm | Palm | 4.82E-05 | 0.413529908 | 0.261 | 0.183 | 1 | early aNSC |
| Eri3 | Eri3 | 4.90E-05 | 0.378042226 | 0.379 | 0.297 | 1 | early aNSC |
| Mgll1 | Mgll | 5.42E-05 | 0.390179071 | 0.414 | 0.326 | 1 | early aNSC |
| Efcab14 | Efcab14 | 5.44E-05 | 0.388714574 | 0.263 | 0.185 | 1 | early aNSC |
| Nme71 | Nme7 | 5.75E-05 | 0.414157837 | 0.437 | 0.365 | 1 | early aNSC |
| Rsrp1 | Rsrp1 | 6.28E-05 | 0.352990106 | 0.542 | 0.489 | 1 | early aNSC |
| Zc3h12b | Zc3h12b | 7.19E-05 | 0.412115857 | 0.366 | 0.285 | 1 | early aNSC |
| Swap701 | Swap70 | 7.28E-05 | 0.331798705 | 0.271 | 0.188 | 1 | early aNSC |
| Kcnip4 | Kcnip4 | 7.68E-05 | 0.573827506 | 0.821 | 0.816 | 1 | early aNSC |
| Rps6ka5 | Rps6ka5 | 7.73E-05 | 0.37665754 | 0.465 | 0.379 | 1 | early aNSC |
| Stag2 | Stag2 | 8.43E-05 | 0.383004134 | 0.422 | 0.35 | 1 | early aNSC |
| Hnrnpa2b1 | Hnrnpa2b1 | 8.55E-05 | 0.330276746 | 0.657 | 0.61 | 1 | early aNSC |
| Adam231 | Adam23 | 9.98E-05 | 0.307025847 | 0.627 | 0.532 | 1 | early aNSC |
| Sort1 | Sort1 | 0.000112968 | 0.376315623 | 0.399 | 0.323 | 1 | early aNSC |
| Trim37 | Trim37 | 0.000118156 | 0.373326132 | 0.394 | 0.31 | 1 | early aNSC |
| Aff11 | Aff1 | 0.000118943 | 0.385662495 | 0.366 | 0.286 | 1 | early aNSC |
| Nt5c2 | Nt5c2 | 0.000121682 | 0.346668421 | 0.506 | 0.43 | 1 | early aNSC |
| Acadsb | Acadsb | 0.000145741 | 0.355093913 | 0.327 | 0.251 | 1 | early aNSC |
| Prickle2 | Prickle2 | 0.000159927 | 0.485306355 | 0.445 | 0.374 | 1 | early aNSC |
| Tef1 | Tef | 0.000172159 | 0.358291651 | 0.463 | 0.397 | 1 | early aNSC |
| Adcy21 | Adcy2 | 0.000197492 | 0.385291062 | 0.609 | 0.545 | 1 | early aNSC |
| Cachd1 | Cachd1 | 0.000214836 | 0.410651584 | 0.468 | 0.405 | 1 | early aNSC |
| Ostm11 | Ostm1 | 0.000216117 | 0.38588377 | 0.297 | 0.218 | 1 | early aNSC |
| Pias2 | Pias2 | 0.000223387 | 0.357424378 | 0.407 | 0.349 | 1 | early aNSC |
| D430042O09Rik | D430042O09Rik | 0.000227087 | 0.340697448 | 0.261 | 0.189 | 1 | early aNSC |
| Zfp5211 | Zfp521 | 0.000240959 | 0.403268066 | 0.486 | 0.416 | 1 | early aNSC |
| Neo1 | Neo1 | 0.000281436 | 0.342427061 | 0.491 | 0.427 | 1 | early aNSC |
| Samd4 | Samd4 | 0.000292731 | 0.41801589 | 0.304 | 0.227 | 1 | early aNSC |
| Palld1 | Palld | 0.000330089 | 0.346635893 | 0.343 | 0.265 | 1 | early aNSC |
| Naaladl21 | Naaladl2 | 0.000339139 | 0.420829874 | 0.43 | 0.356 | 1 | early aNSC |
| Kcnk101 | Kcnk10 | 0.000356656 | 0.321435187 | 0.317 | 0.239 | 1 | early aNSC |
| Tom1l2 | Tom1l2 | 0.000361642 | 0.349162272 | 0.486 | 0.434 | 1 | early aNSC |
| 5330434G04Rik1 | 5330434G04Rik | 0.000369308 | 0.345326319 | 0.261 | 0.187 | 1 | early aNSC |
| Pan3 | Pan3 | 0.000379104 | 0.294130651 | 0.578 | 0.522 | 1 | early aNSC |
| Impact | Impact | 0.000388311 | 0.328795632 | 0.256 | 0.186 | 1 | early aNSC |
| Wdfy2 | Wdfy2 | 0.000412332 | 0.34457965 | 0.279 | 0.205 | 1 | early aNSC |
| Akap13 | Akap13 | 0.000418636 | 0.416142654 | 0.322 | 0.256 | 1 | early aNSC |
| Rgl1 | Rgl1 | 0.000447709 | 0.352261828 | 0.366 | 0.302 | 1 | early aNSC |
| Sh3rf1 | Sh3rf1 | 0.000452268 | 0.357159791 | 0.355 | 0.286 | 1 | early aNSC |
| Odf2 | Odf2 | 0.000454649 | 0.351260603 | 0.33 | 0.261 | 1 | early aNSC |
| Cacna2d11 | Cacna2d1 | 0.000505415 | 0.315723834 | 0.46 | 0.381 | 1 | early aNSC |
| Glud11 | Glud1 | 0.000518079 | 0.251005907 | 0.578 | 0.505 | 1 | early aNSC |
| Hspa4l | Hspa4l | 0.000568498 | 0.36619215 | 0.276 | 0.211 | 1 | early aNSC |
| Zfp608 | Zfp608 | 0.00060754 | 0.306986335 | 0.673 | 0.634 | 1 | early aNSC |
| Itm2b | Itm2b | 0.000618298 | 0.328957371 | 0.524 | 0.464 | 1 | early aNSC |
| Bcas3 | Bcas3 | 0.000618641 | 0.312241939 | 0.591 | 0.554 | 1 | early aNSC |
| Fam228b1 | Fam228b | 0.000641866 | 0.357728676 | 0.309 | 0.245 | 1 | early aNSC |
| Clu1 | Clu | 0.000678806 | 0.356308335 | 0.355 | 0.289 | 1 | early aNSC |
| Dlg1 | Dlg1 | 0.000757257 | 0.332076259 | 0.529 | 0.482 | 1 | early aNSC |
| Zdhhc21 | Zdhhc21 | 0.000775395 | 0.34400447 | 0.263 | 0.2 | 1 | early aNSC |
| Msi1 | Msi1 | 0.000776904 | 0.374290384 | 0.292 | 0.227 | 1 | early aNSC |
| Jak11 | Jak1 | 0.000810658 | 0.3449189 | 0.317 | 0.25 | 1 | early aNSC |
| Pdcd4 | Pdcd4 | 0.000836999 | 0.308429529 | 0.34 | 0.27 | 1 | early aNSC |
| Crebbp | Crebbp | 0.000846993 | 0.263223569 | 0.68 | 0.648 | 1 | early aNSC |
| Rab11fip2 | Rab11fip2 | 0.000848129 | 0.291680066 | 0.345 | 0.275 | 1 | early aNSC |
| Ptpn131 | Ptpn13 | 0.00086154 | 0.306570745 | 0.379 | 0.311 | 1 | early aNSC |
| Adcyap1r1 | Adcyap1r1 | 0.000915394 | 0.301652227 | 0.286 | 0.221 | 1 | early aNSC |
| Dag1 | Dag1 | 0.00095975 | 0.407395215 | 0.263 | 0.202 | 1 | early aNSC |
| Adipor2 | Adipor2 | 0.000993489 | 0.394091177 | 0.263 | 0.201 | 1 | early aNSC |
| Mef2c | Mef2c | 0.001028111 | 0.325384237 | 0.422 | 0.364 | 1 | early aNSC |
| Golgb1 | Golgb1 | 0.001237109 | 0.385403338 | 0.33 | 0.273 | 1 | early aNSC |
| AI314180 | AI314180 | 0.001254884 | 0.257661634 | 0.506 | 0.454 | 1 | early aNSC |
| Xrcc4 | Xrcc4 | 0.001314466 | 0.399000977 | 0.437 | 0.394 | 1 | early aNSC |
| Fus | Fus | 0.001345485 | 0.26620718 | 0.545 | 0.5 | 1 | early aNSC |
| Ash1l | Ash1l | 0.00134733 | 0.293174442 | 0.645 | 0.631 | 1 | early aNSC |
| Nalcn1 | Nalcn | 0.00144248 | 0.350373806 | 0.292 | 0.23 | 1 | early aNSC |
| Ctdspl | Ctdspl | 0.001618801 | 0.30935935 | 0.338 | 0.279 | 1 | early aNSC |
| Itpr1 | Itpr1 | 0.00163982 | 0.376991747 | 0.396 | 0.344 | 1 | early aNSC |
| Usp25 | Usp25 | 0.001867787 | 0.346613597 | 0.251 | 0.191 | 1 | early aNSC |
| Dok6 | Dok6 | 0.001932927 | 0.33515625 | 0.332 | 0.274 | 1 | early aNSC |
| Cacna2d31 | Cacna2d3 | 0.002041351 | 0.314432527 | 0.527 | 0.48 | 1 | early aNSC |
| Ckap5 | Ckap5 | 0.002143326 | 0.31905281 | 0.55 | 0.508 | 1 | early aNSC |
| Hif3a1 | Hif3a | 0.002428708 | 0.299578537 | 0.332 | 0.27 | 1 | early aNSC |
| Tasp1 | Tasp1 | 0.00244313 | 0.329352658 | 0.286 | 0.231 | 1 | early aNSC |
| Pias1 | Pias1 | 0.002505429 | 0.277417508 | 0.506 | 0.46 | 1 | early aNSC |
| Ankrd6 | Ankrd6 | 0.00255715 | 0.320349032 | 0.486 | 0.44 | 1 | early aNSC |
| Ccdc85a | Ccdc85a | 0.002624156 | 0.359384972 | 0.34 | 0.282 | 1 | early aNSC |
| Prpf39 | Prpf39 | 0.002766683 | 0.265774782 | 0.276 | 0.217 | 1 | early aNSC |
| Ankrd28 | Ankrd28 | 0.003012922 | 0.323611644 | 0.417 | 0.371 | 1 | early aNSC |
| Baiap2 | Baiap2 | 0.003110926 | 0.264826177 | 0.281 | 0.226 | 1 | early aNSC |
| Tmsb4x | Tmsb4x | 0.003833325 | 0.253676745 | 0.596 | 0.567 | 1 | early aNSC |
| Usp24 | Usp24 | 0.004174034 | 0.277787298 | 0.389 | 0.333 | 1 | early aNSC |
| Cox8a | Cox8a | 0.004246054 | 0.342080533 | 0.317 | 0.264 | 1 | early aNSC |
| Aldoa | Aldoa | 0.004555472 | 0.258198757 | 0.363 | 0.307 | 1 | early aNSC |
| Tsc22d41 | Tsc22d4 | 0.004565683 | 0.300559703 | 0.294 | 0.239 | 1 | early aNSC |
| Rev1 | Rev1 | 0.004746669 | 0.272291249 | 0.307 | 0.254 | 1 | early aNSC |
| Ski | Ski | 0.005019985 | 0.255178585 | 0.263 | 0.209 | 1 | early aNSC |
| Rab3gap1 | Rab3gap1 | 0.005067412 | 0.354031417 | 0.315 | 0.272 | 1 | early aNSC |
| Tusc3 | Tusc3 | 0.00506903 | 0.284328526 | 0.338 | 0.278 | 1 | early aNSC |
| Ssbp31 | Ssbp3 | 0.005246367 | 0.25734676 | 0.33 | 0.268 | 1 | early aNSC |
| Nfat51 | Nfat5 | 0.005339879 | 0.300701209 | 0.575 | 0.574 | 1 | early aNSC |
| Soat11 | Soat1 | 0.005356794 | 0.257103699 | 0.309 | 0.25 | 1 | early aNSC |
| Sntb11 | Sntb1 | 0.006392091 | 0.310224454 | 0.292 | 0.237 | 1 | early aNSC |
| Lin52 | Lin52 | 0.006452711 | 0.317963527 | 0.371 | 0.326 | 1 | early aNSC |
| Pnpla8 | Pnpla8 | 0.007343305 | 0.34528993 | 0.276 | 0.231 | 1 | early aNSC |
| Gnas | Gnas | 0.007509566 | 0.291336612 | 0.555 | 0.549 | 1 | early aNSC |
| Rpl9-ps6 | Rpl9-ps6 | 0.008202298 | 0.301274621 | 0.302 | 0.253 | 1 | early aNSC |
| Cblb1 | Cblb | 0.008333699 | 0.283951233 | 0.345 | 0.293 | 1 | early aNSC |
| Ube2d3 | Ube2d3 | 0.008561725 | 0.288307789 | 0.366 | 0.315 | 1 | early aNSC |
| Sos2 | Sos2 | 0.008575268 | 0.295310553 | 0.366 | 0.328 | 1 | early aNSC |
| Ppp1r2 | Ppp1r2 | 0.008625449 | 0.307011372 | 0.345 | 0.303 | 1 | early aNSC |
| Tor1aip1 | Tor1aip1 | 0.00939566 | 0.275213749 | 0.297 | 0.245 | 1 | early aNSC |
| E130114P18Rik | E130114P18Rik | 0.009788363 | 0.254883663 | 0.256 | 0.206 | 1 | early aNSC |
| Slc6a11 | Slc6a11 | 6.72E-125 | 2.387690427 | 0.89 | 0.276 | 1.53E-120 | qNSC |
| Fry | Fry | 9.19E-124 | 2.452591519 | 0.931 | 0.351 | 2.09E-119 | qNSC |
| Trpm31 | Trpm3 | 1.49E-119 | 2.285010607 | 0.992 | 0.655 | 3.38E-115 | qNSC |
| B230323A14Rik | B230323A14Rik | 6.71E-115 | 1.88426702 | 0.31 | 0.005 | 1.52E-110 | qNSC |
| Kcnd2 | Kcnd2 | 3.32E-108 | 1.956463789 | 0.996 | 0.797 | 7.54E-104 | qNSC |
| Kank1 | Kank1 | 1.59E-106 | 1.723546219 | 0.567 | 0.075 | 3.60E-102 | qNSC |
| Lrig1 | Lrig1 | 4.71E-100 | 2.004643493 | 0.698 | 0.153 | 1.07E-95 | qNSC |
| Srgap1 | Srgap1 | 4.57E-97 | 1.901243448 | 0.739 | 0.182 | 1.04E-92 | qNSC |
| Lrp1b | Lrp1b | 7.22E-96 | 1.95177709 | 0.976 | 0.724 | 1.64E-91 | qNSC |
| Slc4a41 | Slc4a4 | 4.60E-94 | 1.694354221 | 0.992 | 0.733 | 1.05E-89 | qNSC |
| Gria11 | Gria1 | 3.07E-90 | 2.435205088 | 0.853 | 0.343 | 6.98E-86 | qNSC |
| Npas31 | Npas3 | 1.07E-89 | 1.412625867 | 0.992 | 0.748 | 2.43E-85 | qNSC |
| Slc25a18 | Slc25a18 | 7.48E-87 | 1.384549351 | 0.429 | 0.047 | 1.70E-82 | qNSC |
| Adcy8 | Adcy8 | 1.92E-84 | 1.60368827 | 0.408 | 0.043 | 4.37E-80 | qNSC |
| Itpkb | Itpkb | 6.67E-84 | 1.680372192 | 0.543 | 0.095 | 1.52E-79 | qNSC |
| Atp13a41 | Atp13a4 | 9.29E-78 | 1.639799605 | 0.637 | 0.154 | 2.11E-73 | qNSC |
| Car10 | Car10 | 1.15E-74 | 1.685338784 | 0.38 | 0.044 | 2.61E-70 | qNSC |
| Adgrb31 | Adgrb3 | 4.48E-74 | 1.155673881 | 1 | 0.926 | 1.02E-69 | qNSC |
| Sparcl11 | Sparcl1 | 2.78E-73 | 1.498858686 | 0.967 | 0.523 | 6.31E-69 | qNSC |
| Pitpnc11 | Pitpnc1 | 8.24E-72 | 1.428381946 | 0.992 | 0.798 | 1.87E-67 | qNSC |
| Ptch1 | Ptch1 | 3.33E-71 | 1.83801584 | 0.845 | 0.401 | 7.56E-67 | qNSC |
| Dab2 | Dab2 | 2.02E-69 | 1.067323394 | 0.269 | 0.018 | 4.59E-65 | qNSC |
| Gm33680 | Gm33680 | 4.37E-65 | 1.258651477 | 0.347 | 0.042 | 9.93E-61 | qNSC |
| Plcb1 | Plcb1 | 4.73E-64 | 1.51208863 | 0.967 | 0.76 | 1.08E-59 | qNSC |
| Mdga21 | Mdga2 | 1.27E-63 | 1.178556656 | 0.992 | 0.848 | 2.89E-59 | qNSC |
| Nebl1 | Nebl | 8.57E-63 | 1.5423245 | 0.873 | 0.424 | 1.95E-58 | qNSC |
| Fat31 | Fat3 | 1.56E-60 | 1.39102336 | 0.878 | 0.433 | 3.54E-56 | qNSC |
| Lhfp1 | Lhfp | 5.94E-59 | 1.390948494 | 0.78 | 0.297 | 1.35E-54 | qNSC |
| Gpc51 | Gpc5 | 7.80E-59 | 1.198817028 | 1 | 0.665 | 1.77E-54 | qNSC |
| Cdh201 | Cdh20 | 1.41E-58 | 1.517077636 | 0.857 | 0.395 | 3.19E-54 | qNSC |
| Astn2 | Astn2 | 4.80E-58 | 1.626795824 | 0.784 | 0.366 | 1.09E-53 | qNSC |
| Ppp1r14c | Ppp1r14c | 9.50E-57 | 1.176824879 | 0.298 | 0.035 | 2.16E-52 | qNSC |
| Mpp6 | Mpp6 | 1.11E-56 | 1.598039929 | 0.678 | 0.248 | 2.52E-52 | qNSC |
| Etnppl | Etnppl | 5.42E-56 | 1.530509427 | 0.522 | 0.132 | 1.23E-51 | qNSC |
| Pdgfd | Pdgfd | 1.96E-55 | 1.281818884 | 0.278 | 0.029 | 4.45E-51 | qNSC |
| Camk2g1 | Camk2g | 5.62E-53 | 1.348709737 | 0.812 | 0.387 | 1.28E-48 | qNSC |
| Lgi1 | Lgi1 | 8.77E-53 | 1.461188315 | 0.6 | 0.193 | 1.99E-48 | qNSC |
| Nhsl11 | Nhsl1 | 2.80E-51 | 1.376305419 | 0.861 | 0.451 | 6.37E-47 | qNSC |
| Itih3 | Itih3 | 9.85E-50 | 1.243366913 | 0.31 | 0.046 | 2.24E-45 | qNSC |
| Itga61 | Itga6 | 1.60E-49 | 1.277741541 | 0.629 | 0.214 | 3.64E-45 | qNSC |
| Cables11 | Cables1 | 1.17E-48 | 1.2613155 | 0.735 | 0.305 | 2.66E-44 | qNSC |
| Cep85l1 | Cep85l | 4.50E-46 | 1.269520553 | 0.771 | 0.401 | 1.02E-41 | qNSC |
| Adgrl31 | Adgrl3 | 6.29E-45 | 0.915256185 | 0.984 | 0.844 | 1.43E-40 | qNSC |
| Mgat4c | Mgat4c | 2.78E-43 | 1.233953 | 0.845 | 0.497 | 6.31E-39 | qNSC |
| Acss3 | Acss3 | 6.46E-43 | 0.8945144 | 0.278 | 0.041 | 1.47E-38 | qNSC |
| Cntn1 | Cntn1 | 1.20E-42 | 1.482021681 | 0.698 | 0.354 | 2.71E-38 | qNSC |
| Lrmda | Lrmda | 2.13E-41 | 1.437931623 | 0.473 | 0.137 | 4.84E-37 | qNSC |
| Gabbr21 | Gabbr2 | 2.21E-41 | 1.260624134 | 0.698 | 0.296 | 5.01E-37 | qNSC |
| Plce11 | Plce1 | 1.75E-40 | 1.333377786 | 0.722 | 0.378 | 3.98E-36 | qNSC |
| Slc6a9 | Slc6a9 | 2.05E-40 | 0.868689246 | 0.261 | 0.039 | 4.65E-36 | qNSC |
| Hrh1 | Hrh1 | 4.29E-39 | 0.957440165 | 0.298 | 0.055 | 9.74E-35 | qNSC |
| Tmcc31 | Tmcc3 | 3.63E-38 | 1.151299938 | 0.763 | 0.373 | 8.24E-34 | qNSC |
| Ntm1 | Ntm | 5.14E-38 | 0.850135665 | 1 | 0.821 | 1.17E-33 | qNSC |
| Syne11 | Syne1 | 8.77E-38 | 0.937256914 | 0.927 | 0.602 | 1.99E-33 | qNSC |
| Ddhd11 | Ddhd1 | 4.38E-37 | 1.001917016 | 0.878 | 0.537 | 9.95E-33 | qNSC |
| Aldh1a1 | Aldh1a1 | 4.79E-37 | 1.383599239 | 0.318 | 0.069 | 1.09E-32 | qNSC |
| Sparc | Sparc | 1.00E-36 | 1.011904268 | 0.306 | 0.062 | 2.28E-32 | qNSC |
| Slc39a121 | Slc39a12 | 2.22E-36 | 1.020959487 | 0.714 | 0.322 | 5.03E-32 | qNSC |
| Fut91 | Fut9 | 5.37E-36 | 0.997672736 | 0.841 | 0.529 | 1.22E-31 | qNSC |
| Brinp31 | Brinp3 | 1.11E-35 | 1.24047075 | 0.698 | 0.339 | 2.51E-31 | qNSC |
| Ablim11 | Ablim1 | 1.04E-34 | 1.021372726 | 0.6 | 0.235 | 2.36E-30 | qNSC |
| Skap2 | Skap2 | 2.38E-34 | 0.997207597 | 0.355 | 0.09 | 5.41E-30 | qNSC |
| Atp1a21 | Atp1a2 | 5.05E-34 | 0.878682884 | 0.931 | 0.625 | 1.15E-29 | qNSC |
| Ndrg21 | Ndrg2 | 8.43E-34 | 1.063474447 | 0.706 | 0.357 | 1.92E-29 | qNSC |
| Sash11 | Sash1 | 8.60E-34 | 0.958925919 | 0.8 | 0.44 | 1.95E-29 | qNSC |
| Sorcs21 | Sorcs2 | 1.85E-33 | 1.079769701 | 0.653 | 0.29 | 4.20E-29 | qNSC |
| Kcnt1 | Kcnt1 | 2.66E-33 | 0.93562522 | 0.306 | 0.068 | 6.05E-29 | qNSC |
| Paqr81 | Paqr8 | 4.11E-33 | 1.125563208 | 0.731 | 0.372 | 9.34E-29 | qNSC |
| Gm37641 | Gm3764 | 7.22E-33 | 0.743396408 | 0.984 | 0.838 | 1.64E-28 | qNSC |
| Dock41 | Dock4 | 2.47E-32 | 0.850448394 | 0.939 | 0.735 | 5.62E-28 | qNSC |
| Rhoq1 | Rhoq | 5.49E-32 | 1.045531074 | 0.522 | 0.202 | 1.25E-27 | qNSC |
| Qk1 | Qk | 7.45E-32 | 0.707829242 | 0.984 | 0.874 | 1.69E-27 | qNSC |
| Pde4b | Pde4b | 1.87E-31 | 0.90910321 | 0.833 | 0.544 | 4.25E-27 | qNSC |
| Parvb | Parvb | 2.12E-31 | 0.888760239 | 0.273 | 0.058 | 4.81E-27 | qNSC |
| Ntrk21 | Ntrk2 | 2.79E-31 | 0.773619991 | 0.951 | 0.732 | 6.35E-27 | qNSC |
| Fgfr31 | Fgfr3 | 1.49E-30 | 0.974389605 | 0.653 | 0.324 | 3.39E-26 | qNSC |
| Nrxn11 | Nrxn1 | 1.62E-30 | 0.539742611 | 1 | 0.987 | 3.69E-26 | qNSC |
| Kirrel31 | Kirrel3 | 2.90E-30 | 0.802001722 | 0.939 | 0.666 | 6.59E-26 | qNSC |
| Ednrb | Ednrb | 4.35E-30 | 1.025994027 | 0.486 | 0.182 | 9.88E-26 | qNSC |
| Lsamp1 | Lsamp | 1.79E-29 | 0.676607321 | 1 | 0.975 | 4.07E-25 | qNSC |
| Chl1 | Chl1 | 4.32E-29 | 1.030439706 | 0.339 | 0.095 | 9.82E-25 | qNSC |
| Folh1 | Folh1 | 5.79E-29 | 0.875317817 | 0.314 | 0.081 | 1.31E-24 | qNSC |
| Csgalnact11 | Csgalnact1 | 6.16E-29 | 0.971518392 | 0.71 | 0.385 | 1.40E-24 | qNSC |
| Lrrc4c1 | Lrrc4c | 8.90E-29 | 0.680965107 | 0.996 | 0.858 | 2.02E-24 | qNSC |
| Psd2 | Psd2 | 1.65E-28 | 1.069469764 | 0.539 | 0.236 | 3.76E-24 | qNSC |
| Ccdc1411 | Ccdc141 | 3.51E-28 | 1.041595041 | 0.58 | 0.266 | 7.97E-24 | qNSC |
| Abhd31 | Abhd3 | 5.59E-28 | 0.868600089 | 0.429 | 0.147 | 1.27E-23 | qNSC |
| Fam20a1 | Fam20a | 7.18E-28 | 1.018341473 | 0.596 | 0.265 | 1.63E-23 | qNSC |
| Mfn11 | Mfn1 | 1.48E-27 | 0.940985896 | 0.567 | 0.257 | 3.36E-23 | qNSC |
| 9630028H03Rik | 9630028H03Rik | 1.70E-27 | 1.04199488 | 0.343 | 0.104 | 3.86E-23 | qNSC |
| Tnik1 | Tnik | 2.00E-27 | 0.7158692 | 0.967 | 0.756 | 4.55E-23 | qNSC |
| Gpld11 | Gpld1 | 3.10E-27 | 1.008511027 | 0.522 | 0.227 | 7.04E-23 | qNSC |
| Tprkb1 | Tprkb | 3.26E-27 | 1.013639799 | 0.608 | 0.298 | 7.40E-23 | qNSC |
| Cpq1 | Cpq | 4.18E-27 | 0.887912618 | 0.6 | 0.269 | 9.48E-23 | qNSC |
| Mical21 | Mical2 | 6.15E-27 | 0.906379871 | 0.653 | 0.329 | 1.40E-22 | qNSC |
| 5031439G07Rik | 5031439G07Rik | 1.23E-26 | 1.04467457 | 0.494 | 0.208 | 2.79E-22 | qNSC |
| Hdac81 | Hdac8 | 2.29E-26 | 0.770390298 | 0.947 | 0.718 | 5.21E-22 | qNSC |
| Ntrk3 | Ntrk3 | 2.73E-26 | 0.969054447 | 0.612 | 0.312 | 6.21E-22 | qNSC |
| Carmil11 | Carmil1 | 7.46E-26 | 0.946964261 | 0.702 | 0.403 | 1.70E-21 | qNSC |
| Arhgef261 | Arhgef26 | 9.03E-26 | 0.858151084 | 0.759 | 0.451 | 2.05E-21 | qNSC |
| Sorbs11 | Sorbs1 | 2.21E-25 | 0.864005501 | 0.865 | 0.673 | 5.01E-21 | qNSC |
| Nrcam1 | Nrcam | 8.74E-25 | 0.685438207 | 0.902 | 0.703 | 1.99E-20 | qNSC |
| Tmc71 | Tmc7 | 1.53E-24 | 0.988348775 | 0.429 | 0.17 | 3.47E-20 | qNSC |
| Rgs61 | Rgs6 | 3.05E-24 | 0.834481057 | 0.845 | 0.498 | 6.92E-20 | qNSC |
| Slc7a101 | Slc7a10 | 1.40E-23 | 0.856193696 | 0.433 | 0.169 | 3.17E-19 | qNSC |
| Tmtc2 | Tmtc2 | 1.51E-23 | 0.815794752 | 0.792 | 0.529 | 3.43E-19 | qNSC |
| Pcdh71 | Pcdh7 | 1.98E-23 | 0.654369027 | 0.943 | 0.655 | 4.49E-19 | qNSC |
| Pcx | Pcx | 4.86E-23 | 0.940952736 | 0.445 | 0.187 | 1.10E-18 | qNSC |
| Ccdc85a1 | Ccdc85a | 1.21E-22 | 0.907704634 | 0.547 | 0.259 | 2.75E-18 | qNSC |
| Kcnj10 | Kcnj10 | 1.58E-22 | 0.858357132 | 0.347 | 0.118 | 3.59E-18 | qNSC |
| Shisa91 | Shisa9 | 2.56E-22 | 0.889073022 | 0.637 | 0.343 | 5.81E-18 | qNSC |
| Nlgn12 | Nlgn1 | 3.55E-22 | 0.560476962 | 0.988 | 0.939 | 8.06E-18 | qNSC |
| Ddo1 | Ddo | 9.73E-22 | 0.85649008 | 0.531 | 0.26 | 2.21E-17 | qNSC |
| Slc25a21 | Slc25a21 | 2.02E-21 | 0.933815232 | 0.306 | 0.097 | 4.59E-17 | qNSC |
| Spon11 | Spon1 | 6.08E-21 | 0.70620711 | 0.665 | 0.364 | 1.38E-16 | qNSC |
| Nr3c22 | Nr3c2 | 1.99E-20 | 0.747906277 | 0.8 | 0.541 | 4.53E-16 | qNSC |
| F31 | F3 | 2.46E-20 | 0.830768583 | 0.604 | 0.332 | 5.60E-16 | qNSC |
| Cdh101 | Cdh10 | 2.60E-20 | 0.739727577 | 0.845 | 0.556 | 5.92E-16 | qNSC |
| Rora2 | Rora | 3.27E-20 | 0.569550548 | 1 | 0.865 | 7.43E-16 | qNSC |
| Pla2g71 | Pla2g7 | 3.46E-20 | 0.944735284 | 0.433 | 0.193 | 7.86E-16 | qNSC |
| Phyhipl1 | Phyhipl | 4.87E-20 | 0.743140837 | 0.641 | 0.361 | 1.11E-15 | qNSC |
| Gabrb11 | Gabrb1 | 5.28E-20 | 0.592118995 | 0.996 | 0.782 | 1.20E-15 | qNSC |
| Mtss1l1 | Mtss1l | 6.35E-20 | 0.75494079 | 0.543 | 0.27 | 1.44E-15 | qNSC |
| Atp1b21 | Atp1b2 | 1.21E-19 | 0.753475406 | 0.457 | 0.205 | 2.76E-15 | qNSC |
| Dmd | Dmd | 1.38E-19 | 0.691426892 | 0.849 | 0.707 | 3.14E-15 | qNSC |
| Gsdme | Gsdme | 1.53E-19 | 0.899092584 | 0.416 | 0.182 | 3.47E-15 | qNSC |
| Slc6a1 | Slc6a1 | 2.56E-19 | 0.730205915 | 0.739 | 0.488 | 5.81E-15 | qNSC |
| Abtb2 | Abtb2 | 7.70E-19 | 0.82913601 | 0.376 | 0.15 | 1.75E-14 | qNSC |
| Cdh191 | Cdh19 | 8.44E-19 | 0.853903958 | 0.518 | 0.259 | 1.92E-14 | qNSC |
| Tnfaip8 | Tnfaip8 | 1.32E-18 | 0.789841845 | 0.335 | 0.127 | 3.00E-14 | qNSC |
| Farp11 | Farp1 | 1.46E-18 | 0.524286995 | 0.947 | 0.811 | 3.32E-14 | qNSC |
| Itpr21 | Itpr2 | 2.22E-18 | 0.759324783 | 0.547 | 0.284 | 5.04E-14 | qNSC |
| Atp13a5 | Atp13a5 | 2.22E-18 | 0.678972943 | 0.253 | 0.077 | 5.05E-14 | qNSC |
| 2310022B05Rik | 2310022B05Rik | 2.50E-18 | 0.699556473 | 0.261 | 0.083 | 5.68E-14 | qNSC |
| Macf11 | Macf1 | 3.46E-18 | 0.439601219 | 0.988 | 0.935 | 7.87E-14 | qNSC |
| Syn21 | Syn2 | 4.86E-18 | 0.776935253 | 0.616 | 0.369 | 1.10E-13 | qNSC |
| Prkca1 | Prkca | 5.60E-18 | 0.763275316 | 0.551 | 0.275 | 1.27E-13 | qNSC |
| Nrp1 | Nrp1 | 5.61E-18 | 0.736674455 | 0.31 | 0.115 | 1.27E-13 | qNSC |
| Chpt11 | Chpt1 | 6.89E-18 | 0.79451597 | 0.539 | 0.289 | 1.56E-13 | qNSC |
| Appl21 | Appl2 | 8.94E-18 | 0.660553459 | 0.661 | 0.378 | 2.03E-13 | qNSC |
| Eps81 | Eps8 | 1.69E-17 | 0.810141584 | 0.494 | 0.247 | 3.85E-13 | qNSC |
| Nwd11 | Nwd1 | 2.04E-17 | 0.627489068 | 0.763 | 0.483 | 4.63E-13 | qNSC |
| Lifr | Lifr | 2.24E-17 | 0.736988364 | 0.359 | 0.15 | 5.09E-13 | qNSC |
| Plcb41 | Plcb4 | 2.34E-17 | 0.709855748 | 0.673 | 0.444 | 5.30E-13 | qNSC |
| Slc7a111 | Slc7a11 | 2.47E-17 | 0.729152521 | 0.527 | 0.262 | 5.60E-13 | qNSC |
| Pip4k2a | Pip4k2a | 3.13E-17 | 0.729381853 | 0.498 | 0.263 | 7.12E-13 | qNSC |
| Ghr1 | Ghr | 5.36E-17 | 0.82438614 | 0.616 | 0.365 | 1.22E-12 | qNSC |
| Mcc2 | Mcc | 5.41E-17 | 0.81476495 | 0.629 | 0.385 | 1.23E-12 | qNSC |
| Grk31 | Grk3 | 9.50E-17 | 0.643949479 | 0.767 | 0.49 | 2.16E-12 | qNSC |
| Ttll3 | Ttll3 | 9.70E-17 | 0.682883486 | 0.253 | 0.084 | 2.20E-12 | qNSC |
| Grin3a | Grin3a | 1.04E-16 | 0.809988296 | 0.306 | 0.118 | 2.37E-12 | qNSC |
| Gria21 | Gria2 | 1.53E-16 | 0.484551731 | 0.971 | 0.864 | 3.49E-12 | qNSC |
| Actr3b | Actr3b | 1.67E-16 | 0.72209737 | 0.327 | 0.131 | 3.80E-12 | qNSC |
| Selenop | Selenop | 2.00E-16 | 0.646394758 | 0.261 | 0.089 | 4.54E-12 | qNSC |
| 2610035D17Rik2 | 2610035D17Rik | 2.25E-16 | 0.757583915 | 0.669 | 0.412 | 5.11E-12 | qNSC |
| Sfxn52 | Sfxn5 | 2.64E-16 | 0.603136041 | 0.853 | 0.61 | 6.00E-12 | qNSC |
| Phka11 | Phka1 | 3.21E-16 | 0.64254392 | 0.727 | 0.476 | 7.28E-12 | qNSC |
| Xylt11 | Xylt1 | 4.08E-16 | 0.613321036 | 0.62 | 0.35 | 9.27E-12 | qNSC |
| Limch11 | Limch1 | 4.41E-16 | 0.682649717 | 0.686 | 0.438 | 1.00E-11 | qNSC |
| Acsbg11 | Acsbg1 | 9.45E-16 | 0.695650692 | 0.58 | 0.334 | 2.15E-11 | qNSC |
| Gli21 | Gli2 | 1.05E-15 | 0.66147521 | 0.576 | 0.324 | 2.38E-11 | qNSC |
| Fam19a5 | Fam19a5 | 1.21E-15 | 0.730227598 | 0.482 | 0.254 | 2.76E-11 | qNSC |
| Ntng2 | Ntng2 | 1.38E-15 | 0.608326524 | 0.265 | 0.094 | 3.14E-11 | qNSC |
| Ttyh2 | Ttyh2 | 1.52E-15 | 0.586244917 | 0.298 | 0.112 | 3.44E-11 | qNSC |
| Lpp1 | Lpp | 1.66E-15 | 0.635541897 | 0.747 | 0.508 | 3.77E-11 | qNSC |
| Rapgef31 | Rapgef3 | 2.16E-15 | 0.691965057 | 0.424 | 0.204 | 4.91E-11 | qNSC |
| Phlpp11 | Phlpp1 | 4.05E-15 | 0.493346601 | 0.873 | 0.693 | 9.19E-11 | qNSC |
| Sema6d1 | Sema6d | 4.32E-15 | 0.777236769 | 0.727 | 0.517 | 9.81E-11 | qNSC |
| Acss12 | Acss1 | 7.98E-15 | 0.617659447 | 0.661 | 0.415 | 1.81E-10 | qNSC |
| Fgf11 | Fgf1 | 1.01E-14 | 0.724959993 | 0.388 | 0.182 | 2.29E-10 | qNSC |
| Ldb21 | Ldb2 | 1.16E-14 | 0.588226653 | 0.437 | 0.205 | 2.64E-10 | qNSC |
| Abr1 | Abr | 1.25E-14 | 0.630214908 | 0.796 | 0.6 | 2.85E-10 | qNSC |
| Cyp2j6 | Cyp2j6 | 1.42E-14 | 0.65528157 | 0.351 | 0.154 | 3.22E-10 | qNSC |
| Ahcyl11 | Ahcyl1 | 1.70E-14 | 0.721548024 | 0.624 | 0.419 | 3.87E-10 | qNSC |
| Ppp2r2b2 | Ppp2r2b | 1.71E-14 | 0.527954961 | 0.898 | 0.671 | 3.89E-10 | qNSC |
| Mapk10 | Mapk10 | 1.89E-14 | 0.604866727 | 0.739 | 0.51 | 4.29E-10 | qNSC |
| Cit | Cit | 1.91E-14 | 0.684381695 | 0.339 | 0.146 | 4.33E-10 | qNSC |
| Pgm2 | Pgm2 | 2.05E-14 | 0.727518488 | 0.327 | 0.142 | 4.65E-10 | qNSC |
| Trim91 | Trim9 | 3.55E-14 | 0.550466105 | 0.816 | 0.574 | 8.06E-10 | qNSC |
| Pde7b1 | Pde7b | 4.45E-14 | 0.660767222 | 0.669 | 0.435 | 1.01E-09 | qNSC |
| Rfx42 | Rfx4 | 5.39E-14 | 0.612427507 | 0.678 | 0.439 | 1.22E-09 | qNSC |
| Cyp7b11 | Cyp7b1 | 6.88E-14 | 0.763702565 | 0.478 | 0.258 | 1.56E-09 | qNSC |
| Dpf31 | Dpf3 | 9.09E-14 | 0.654832459 | 0.457 | 0.233 | 2.06E-09 | qNSC |
| Egfr | Egfr | 9.53E-14 | 0.391716326 | 0.616 | 0.38 | 2.16E-09 | qNSC |
| Pik3r1 | Pik3r1 | 9.86E-14 | 0.745560267 | 0.604 | 0.403 | 2.24E-09 | qNSC |
| Mitf1 | Mitf | 1.38E-13 | 0.743981229 | 0.351 | 0.165 | 3.14E-09 | qNSC |
| Aqp4 | Aqp4 | 1.59E-13 | 0.697350426 | 0.302 | 0.128 | 3.60E-09 | qNSC |
| Gab2 | Gab2 | 1.61E-13 | 0.613060268 | 0.453 | 0.235 | 3.65E-09 | qNSC |
| Rgs7bp | Rgs7bp | 2.34E-13 | 0.69312056 | 0.539 | 0.318 | 5.32E-09 | qNSC |
| Ptprj | Ptprj | 2.71E-13 | 0.604174184 | 0.359 | 0.166 | 6.16E-09 | qNSC |
| Plxdc21 | Plxdc2 | 3.18E-13 | 0.71201843 | 0.404 | 0.209 | 7.23E-09 | qNSC |
| Nkx2-2os1 | Nkx2-2os | 3.29E-13 | 0.694095842 | 0.327 | 0.147 | 7.47E-09 | qNSC |
| Cadm21 | Cadm2 | 3.30E-13 | 0.336081784 | 1 | 0.979 | 7.49E-09 | qNSC |
| Atl21 | Atl2 | 4.48E-13 | 0.714056379 | 0.494 | 0.29 | 1.02E-08 | qNSC |
| Pitpnm21 | Pitpnm2 | 4.76E-13 | 0.625672332 | 0.433 | 0.236 | 1.08E-08 | qNSC |
| Thrb1 | Thrb | 5.96E-13 | 0.578936167 | 0.702 | 0.48 | 1.35E-08 | qNSC |
| Antxr1 | Antxr1 | 1.12E-12 | 0.622781439 | 0.31 | 0.139 | 2.55E-08 | qNSC |
| Cyfip1 | Cyfip1 | 1.53E-12 | 0.65932447 | 0.469 | 0.269 | 3.47E-08 | qNSC |
| Tcf7l22 | Tcf7l2 | 1.74E-12 | 0.547865757 | 0.731 | 0.49 | 3.96E-08 | qNSC |
| Arhgap261 | Arhgap26 | 1.83E-12 | 0.516438087 | 0.763 | 0.51 | 4.16E-08 | qNSC |
| Eps152 | Eps15 | 1.89E-12 | 0.51249217 | 0.727 | 0.517 | 4.29E-08 | qNSC |
| Klf91 | Klf9 | 3.00E-12 | 0.583438171 | 0.502 | 0.292 | 6.82E-08 | qNSC |
| Mfhas11 | Mfhas1 | 3.33E-12 | 0.697028272 | 0.314 | 0.147 | 7.57E-08 | qNSC |
| Kcnq31 | Kcnq3 | 3.59E-12 | 0.705639915 | 0.612 | 0.411 | 8.15E-08 | qNSC |
| Ptprz11 | Ptprz1 | 3.99E-12 | 0.388985415 | 0.951 | 0.821 | 9.06E-08 | qNSC |
| Ahcyl21 | Ahcyl2 | 4.35E-12 | 0.626691395 | 0.604 | 0.394 | 9.87E-08 | qNSC |
| Fnbp11 | Fnbp1 | 4.44E-12 | 0.51875237 | 0.78 | 0.551 | 1.01E-07 | qNSC |
| Npas21 | Npas2 | 6.83E-12 | 0.507500803 | 0.506 | 0.288 | 1.55E-07 | qNSC |
| Acot111 | Acot11 | 7.90E-12 | 0.609633702 | 0.376 | 0.187 | 1.80E-07 | qNSC |
| Ntsr21 | Ntsr2 | 8.75E-12 | 0.654402424 | 0.473 | 0.279 | 1.99E-07 | qNSC |
| Cyp2j91 | Cyp2j9 | 1.01E-11 | 0.505034089 | 0.343 | 0.162 | 2.29E-07 | qNSC |
| Tom1 | Tom1 | 1.25E-11 | 0.499861167 | 0.298 | 0.132 | 2.83E-07 | qNSC |
| Limk2 | Limk2 | 1.25E-11 | 0.605880597 | 0.314 | 0.149 | 2.85E-07 | qNSC |
| Bcl22 | Bcl2 | 1.51E-11 | 0.519738264 | 0.673 | 0.467 | 3.42E-07 | qNSC |
| Kcnma11 | Kcnma1 | 1.77E-11 | 0.499628233 | 0.718 | 0.501 | 4.02E-07 | qNSC |
| Elmo2 | Elmo2 | 1.88E-11 | 0.542092176 | 0.269 | 0.115 | 4.27E-07 | qNSC |
| Mapk41 | Mapk4 | 2.00E-11 | 0.523338944 | 0.78 | 0.566 | 4.55E-07 | qNSC |
| Arhgap51 | Arhgap5 | 2.29E-11 | 0.51077757 | 0.804 | 0.627 | 5.21E-07 | qNSC |
| Serpine21 | Serpine2 | 3.37E-11 | 0.627100672 | 0.584 | 0.378 | 7.64E-07 | qNSC |
| Ppargc1a1 | Ppargc1a | 4.24E-11 | 0.529996149 | 0.543 | 0.328 | 9.63E-07 | qNSC |
| Phkg11 | Phkg1 | 4.71E-11 | 0.440175669 | 0.673 | 0.415 | 1.07E-06 | qNSC |
| Usp531 | Usp53 | 5.57E-11 | 0.718376014 | 0.359 | 0.192 | 1.26E-06 | qNSC |
| Kcnip3 | Kcnip3 | 5.96E-11 | 0.614379742 | 0.461 | 0.273 | 1.35E-06 | qNSC |
| Sox61 | Sox6 | 7.66E-11 | 0.409984246 | 0.882 | 0.726 | 1.74E-06 | qNSC |
| Hacd21 | Hacd2 | 8.93E-11 | 0.651537496 | 0.465 | 0.28 | 2.03E-06 | qNSC |
| Kifc3 | Kifc3 | 9.35E-11 | 0.441625302 | 0.257 | 0.11 | 2.12E-06 | qNSC |
| Asic21 | Asic2 | 1.09E-10 | 0.325234476 | 0.706 | 0.513 | 2.48E-06 | qNSC |
| Dbx21 | Dbx2 | 1.12E-10 | 0.550326618 | 0.376 | 0.197 | 2.54E-06 | qNSC |
| Trps12 | Trps1 | 1.19E-10 | 0.448660261 | 0.935 | 0.776 | 2.71E-06 | qNSC |
| Ttyh11 | Ttyh1 | 1.24E-10 | 0.446463496 | 0.751 | 0.515 | 2.81E-06 | qNSC |
| Tom1l11 | Tom1l1 | 1.37E-10 | 0.590559652 | 0.38 | 0.202 | 3.11E-06 | qNSC |
| Gpd21 | Gpd2 | 1.40E-10 | 0.591970895 | 0.396 | 0.219 | 3.17E-06 | qNSC |
| Rreb11 | Rreb1 | 1.44E-10 | 0.570055206 | 0.424 | 0.244 | 3.26E-06 | qNSC |
| 1110019D14Rik | 1110019D14Rik | 1.49E-10 | 0.651409889 | 0.318 | 0.161 | 3.40E-06 | qNSC |
| Ank21 | Ank2 | 1.52E-10 | 0.333317222 | 0.971 | 0.943 | 3.44E-06 | qNSC |
| Smox | Smox | 1.73E-10 | 0.535860522 | 0.265 | 0.121 | 3.94E-06 | qNSC |
| Lpcat3 | Lpcat3 | 1.85E-10 | 0.532223563 | 0.318 | 0.157 | 4.21E-06 | qNSC |
| Myo61 | Myo6 | 2.22E-10 | 0.456950292 | 0.784 | 0.545 | 5.04E-06 | qNSC |
| Dnah7b | Dnah7b | 2.48E-10 | 0.560812128 | 0.31 | 0.154 | 5.63E-06 | qNSC |
| Agmo1 | Agmo | 2.57E-10 | 0.630589035 | 0.412 | 0.227 | 5.84E-06 | qNSC |
| Acsl32 | Acsl3 | 2.87E-10 | 0.40073333 | 0.747 | 0.546 | 6.52E-06 | qNSC |
| Pnpla71 | Pnpla7 | 2.89E-10 | 0.498105818 | 0.596 | 0.383 | 6.55E-06 | qNSC |
| Fgf141 | Fgf14 | 2.90E-10 | 0.2970524 | 0.976 | 0.911 | 6.58E-06 | qNSC |
| Arhgef121 | Arhgef12 | 3.02E-10 | 0.471598695 | 0.776 | 0.613 | 6.86E-06 | qNSC |
| Kcnip41 | Kcnip4 | 3.34E-10 | 0.298240718 | 0.898 | 0.806 | 7.59E-06 | qNSC |
| Mmd21 | Mmd2 | 4.20E-10 | 0.482949003 | 0.6 | 0.392 | 9.54E-06 | qNSC |
| Jakmip1 | Jakmip1 | 5.33E-10 | 0.621509812 | 0.286 | 0.136 | 1.21E-05 | qNSC |
| Hivep21 | Hivep2 | 5.47E-10 | 0.527877404 | 0.669 | 0.516 | 1.24E-05 | qNSC |
| Pde4d1 | Pde4d | 6.51E-10 | 0.266550888 | 0.796 | 0.592 | 1.48E-05 | qNSC |
| Ttll8 | Ttll8 | 7.76E-10 | 0.54445743 | 0.265 | 0.123 | 1.76E-05 | qNSC |
| Lrp1 | Lrp1 | 1.02E-09 | 0.565507385 | 0.478 | 0.295 | 2.32E-05 | qNSC |
| Cap21 | Cap2 | 1.21E-09 | 0.57034201 | 0.449 | 0.279 | 2.74E-05 | qNSC |
| Atp2a2 | Atp2a2 | 1.23E-09 | 0.468954378 | 0.743 | 0.596 | 2.80E-05 | qNSC |
| Caskin11 | Caskin1 | 1.24E-09 | 0.463219244 | 0.461 | 0.268 | 2.83E-05 | qNSC |
| Galnt161 | Galnt16 | 1.69E-09 | 0.612104783 | 0.384 | 0.218 | 3.83E-05 | qNSC |
| Hepacam2 | Hepacam | 2.52E-09 | 0.47740221 | 0.637 | 0.443 | 5.73E-05 | qNSC |
| Bmpr1b1 | Bmpr1b | 2.57E-09 | 0.36357041 | 0.747 | 0.509 | 5.84E-05 | qNSC |
| Shroom21 | Shroom2 | 3.06E-09 | 0.522448441 | 0.363 | 0.195 | 6.95E-05 | qNSC |
| Apba21 | Apba2 | 3.08E-09 | 0.484603615 | 0.661 | 0.479 | 7.01E-05 | qNSC |
| Pcdh171 | Pcdh17 | 3.18E-09 | 0.516022902 | 0.588 | 0.404 | 7.23E-05 | qNSC |
| Arhgef42 | Arhgef4 | 3.18E-09 | 0.468649584 | 0.633 | 0.445 | 7.23E-05 | qNSC |
| Xpr1 | Xpr1 | 3.42E-09 | 0.524795127 | 0.6 | 0.429 | 7.76E-05 | qNSC |
| Pygb1 | Pygb | 4.04E-09 | 0.438426783 | 0.608 | 0.413 | 9.18E-05 | qNSC |
| Gramd1b1 | Gramd1b | 4.13E-09 | 0.538545763 | 0.51 | 0.335 | 9.39E-05 | qNSC |
| Nxpe4 | Nxpe4 | 6.98E-09 | 0.507015383 | 0.404 | 0.235 | 0.000158602 | qNSC |
| Lama22 | Lama2 | 7.84E-09 | 0.415015173 | 0.771 | 0.569 | 0.000178026 | qNSC |
| Rasgrf11 | Rasgrf1 | 7.84E-09 | 0.605577652 | 0.347 | 0.2 | 0.000178118 | qNSC |
| Tmem1641 | Tmem164 | 8.15E-09 | 0.522926556 | 0.665 | 0.473 | 0.000185137 | qNSC |
| Abca12 | Abca1 | 8.91E-09 | 0.496481142 | 0.612 | 0.421 | 0.000202281 | qNSC |
| Dock12 | Dock1 | 9.44E-09 | 0.436987983 | 0.763 | 0.544 | 0.000214364 | qNSC |
| Rgma1 | Rgma | 1.16E-08 | 0.538509568 | 0.531 | 0.359 | 0.000264303 | qNSC |
| Gm45846 | Gm45846 | 1.19E-08 | 0.528358922 | 0.306 | 0.161 | 0.000269314 | qNSC |
| Samd41 | Samd4 | 1.38E-08 | 0.579786794 | 0.376 | 0.224 | 0.000314562 | qNSC |
| Son1 | Son | 1.48E-08 | 0.331816677 | 0.837 | 0.687 | 0.000335203 | qNSC |
| Acsl61 | Acsl6 | 1.57E-08 | 0.450919336 | 0.494 | 0.312 | 0.000356796 | qNSC |
| Ramp1 | Ramp1 | 1.76E-08 | 0.513418026 | 0.314 | 0.168 | 0.000400454 | qNSC |
| Wwc11 | Wwc1 | 1.79E-08 | 0.529619669 | 0.571 | 0.391 | 0.000407333 | qNSC |
| Aco21 | Aco2 | 2.17E-08 | 0.541433686 | 0.498 | 0.337 | 0.000492845 | qNSC |
| Frmpd11 | Frmpd1 | 2.24E-08 | 0.530777079 | 0.302 | 0.161 | 0.000508219 | qNSC |
| Csrp11 | Csrp1 | 2.31E-08 | 0.494793169 | 0.404 | 0.245 | 0.000523657 | qNSC |
| Mboat2 | Mboat2 | 2.35E-08 | 0.510368983 | 0.62 | 0.465 | 0.000532655 | qNSC |
| Celrr1 | Celrr | 3.02E-08 | 0.392631179 | 0.376 | 0.209 | 0.00068596 | qNSC |
| Ptprm | Ptprm | 3.17E-08 | 0.286599802 | 0.624 | 0.421 | 0.00071991 | qNSC |
| Nos1ap | Nos1ap | 3.41E-08 | 0.413327475 | 0.38 | 0.217 | 0.000775104 | qNSC |
| Arrb11 | Arrb1 | 3.55E-08 | 0.518117131 | 0.384 | 0.23 | 0.000805863 | qNSC |
| Plcd41 | Plcd4 | 3.72E-08 | 0.542261538 | 0.322 | 0.182 | 0.000845661 | qNSC |
| Mast41 | Mast4 | 4.77E-08 | 0.502197146 | 0.6 | 0.417 | 0.001083697 | qNSC |
| Gm9732 | Gm973 | 5.82E-08 | 0.341306058 | 0.673 | 0.47 | 0.001321243 | qNSC |
| Aldh1l11 | Aldh1l1 | 5.98E-08 | 0.491721894 | 0.351 | 0.196 | 0.001358948 | qNSC |
| Phf21b1 | Phf21b | 6.25E-08 | 0.474314193 | 0.347 | 0.204 | 0.001419328 | qNSC |
| St3gal41 | St3gal4 | 6.98E-08 | 0.427748892 | 0.784 | 0.63 | 0.001585539 | qNSC |
| Cuedc11 | Cuedc1 | 7.44E-08 | 0.506889459 | 0.433 | 0.281 | 0.001690909 | qNSC |
| Mro | Mro | 7.69E-08 | 0.46854949 | 0.265 | 0.137 | 0.001746661 | qNSC |
| Fmn21 | Fmn2 | 7.71E-08 | 0.355407737 | 0.873 | 0.751 | 0.001750378 | qNSC |
| Ank | Ank | 1.07E-07 | 0.552316642 | 0.469 | 0.33 | 0.002427551 | qNSC |
| Cpeb11 | Cpeb1 | 1.09E-07 | 0.445989734 | 0.331 | 0.188 | 0.002465622 | qNSC |
| Tspan91 | Tspan9 | 1.40E-07 | 0.518152925 | 0.449 | 0.297 | 0.00319055 | qNSC |
| Abi11 | Abi1 | 1.53E-07 | 0.438094363 | 0.616 | 0.457 | 0.003476777 | qNSC |
| Desi21 | Desi2 | 1.62E-07 | 0.427245484 | 0.596 | 0.444 | 0.003673957 | qNSC |
| Sh3pxd2b1 | Sh3pxd2b | 1.68E-07 | 0.535461961 | 0.404 | 0.267 | 0.003809107 | qNSC |
| Abat1 | Abat | 1.70E-07 | 0.449856427 | 0.559 | 0.402 | 0.003862432 | qNSC |
| A830082K12Rik | A830082K12Rik | 1.92E-07 | 0.459871816 | 0.29 | 0.161 | 0.004365485 | qNSC |
| Rorb1 | Rorb | 1.98E-07 | 0.252930004 | 0.918 | 0.697 | 0.004498098 | qNSC |
| Itgb8 | Itgb8 | 2.03E-07 | 0.476153504 | 0.4 | 0.251 | 0.004604039 | qNSC |
| Nckap52 | Nckap5 | 2.22E-07 | 0.3573351 | 0.816 | 0.606 | 0.005037553 | qNSC |
| Daam21 | Daam2 | 2.43E-07 | 0.384477788 | 0.527 | 0.329 | 0.005511355 | qNSC |
| Myrip | Myrip | 2.58E-07 | 0.509172049 | 0.265 | 0.142 | 0.005860601 | qNSC |
| Gpr37l11 | Gpr37l1 | 2.73E-07 | 0.486704785 | 0.339 | 0.201 | 0.006193876 | qNSC |
| Glul1 | Glul | 3.47E-07 | 0.389007899 | 0.596 | 0.421 | 0.007887401 | qNSC |
| Arhgap421 | Arhgap42 | 3.65E-07 | 0.51224924 | 0.327 | 0.194 | 0.008299863 | qNSC |
| Prdm51 | Prdm5 | 3.79E-07 | 0.403943714 | 0.331 | 0.193 | 0.008612629 | qNSC |
| Megf101 | Megf10 | 4.21E-07 | 0.475562732 | 0.424 | 0.284 | 0.009556762 | qNSC |
| Utrn1 | Utrn | 4.49E-07 | 0.418468012 | 0.588 | 0.433 | 0.010190477 | qNSC |
| Pid11 | Pid1 | 4.64E-07 | 0.372737568 | 0.649 | 0.492 | 0.010539378 | qNSC |
| Camk1d | Camk1d | 5.18E-07 | 0.40715661 | 0.771 | 0.63 | 0.011757388 | qNSC |
| Zcchc241 | Zcchc24 | 5.20E-07 | 0.494446559 | 0.314 | 0.183 | 0.011809285 | qNSC |
| Tulp31 | Tulp3 | 5.65E-07 | 0.381716654 | 0.42 | 0.277 | 0.012828797 | qNSC |
| Rev3l1 | Rev3l | 6.41E-07 | 0.42406838 | 0.58 | 0.441 | 0.014560913 | qNSC |
| Glud12 | Glud1 | 7.53E-07 | 0.397103137 | 0.645 | 0.502 | 0.017102762 | qNSC |
| Nr3c11 | Nr3c1 | 7.71E-07 | 0.438652079 | 0.424 | 0.275 | 0.017508428 | qNSC |
| Chd91 | Chd9 | 8.23E-07 | 0.318460051 | 0.829 | 0.721 | 0.018703892 | qNSC |
| Fstl1 | Fstl1 | 9.29E-07 | 0.41722294 | 0.257 | 0.138 | 0.02109671 | qNSC |
| Zfp4231 | Zfp423 | 9.45E-07 | 0.447350935 | 0.343 | 0.211 | 0.021471046 | qNSC |
| Snta11 | Snta1 | 1.10E-06 | 0.384358522 | 0.396 | 0.247 | 0.024944635 | qNSC |
| Kif13a1 | Kif13a | 1.12E-06 | 0.399525637 | 0.371 | 0.228 | 0.025395331 | qNSC |
| Gm405781 | Gm40578 | 1.24E-06 | 0.472430753 | 0.408 | 0.27 | 0.028250386 | qNSC |
| Ptpn132 | Ptpn13 | 1.37E-06 | 0.347819436 | 0.457 | 0.306 | 0.031161807 | qNSC |
| Etv51 | Etv5 | 1.42E-06 | 0.444173911 | 0.294 | 0.172 | 0.032344269 | qNSC |
| Slc1a32 | Slc1a3 | 1.54E-06 | 0.282618033 | 0.967 | 0.738 | 0.03488381 | qNSC |
| Prickle21 | Prickle2 | 1.55E-06 | 0.405820429 | 0.531 | 0.368 | 0.03511654 | qNSC |
| Pcyt2 | Pcyt2 | 1.57E-06 | 0.434733541 | 0.327 | 0.196 | 0.035612687 | qNSC |
| Neo11 | Neo1 | 1.62E-06 | 0.366827052 | 0.588 | 0.419 | 0.036694785 | qNSC |
| Agl1 | Agl | 1.75E-06 | 0.431554801 | 0.408 | 0.267 | 0.03966985 | qNSC |
| Prrx12 | Prrx1 | 1.81E-06 | 0.429413453 | 0.445 | 0.3 | 0.041033164 | qNSC |
| Fam214a | Fam214a | 1.84E-06 | 0.432055484 | 0.461 | 0.322 | 0.041720616 | qNSC |
| Clmn1 | Clmn | 1.93E-06 | 0.297336347 | 0.498 | 0.324 | 0.043730687 | qNSC |
| Wwc21 | Wwc2 | 1.94E-06 | 0.471514949 | 0.343 | 0.212 | 0.044151972 | qNSC |
| Tcf7l12 | Tcf7l1 | 2.27E-06 | 0.407812124 | 0.437 | 0.288 | 0.05148413 | qNSC |
| Nnat1 | Nnat | 2.35E-06 | 0.697717624 | 0.567 | 0.455 | 0.053409917 | qNSC |
| Gja12 | Gja1 | 2.91E-06 | 0.438327108 | 0.494 | 0.348 | 0.066086684 | qNSC |
| Ttc231 | Ttc23 | 2.98E-06 | 0.411205681 | 0.302 | 0.18 | 0.067670931 | qNSC |
| Phkb1 | Phkb | 3.29E-06 | 0.421303498 | 0.604 | 0.47 | 0.074648341 | qNSC |
| Gulp11 | Gulp1 | 3.47E-06 | 0.403518886 | 0.408 | 0.263 | 0.078777607 | qNSC |
| Irf21 | Irf2 | 3.54E-06 | 0.358723754 | 0.359 | 0.226 | 0.080389804 | qNSC |
| Phactr31 | Phactr3 | 3.60E-06 | 0.39693367 | 0.596 | 0.459 | 0.081706657 | qNSC |
| Vps13d1 | Vps13d | 3.60E-06 | 0.475157854 | 0.486 | 0.35 | 0.081769761 | qNSC |
| Gna131 | Gna13 | 3.69E-06 | 0.469236918 | 0.388 | 0.259 | 0.083848466 | qNSC |
| Dner | Dner | 3.76E-06 | 0.444732392 | 0.327 | 0.2 | 0.085484454 | qNSC |
| Asap11 | Asap1 | 4.82E-06 | 0.291144799 | 0.665 | 0.512 | 0.109576395 | qNSC |
| Gm376791 | Gm37679 | 5.05E-06 | 0.450198843 | 0.339 | 0.213 | 0.114805465 | qNSC |
| Gm487471 | Gm48747 | 5.43E-06 | 0.346074872 | 0.494 | 0.343 | 0.123276317 | qNSC |
| Csmd2 | Csmd2 | 5.85E-06 | 0.399845412 | 0.298 | 0.179 | 0.132774333 | qNSC |
| Gm26691 | Gm26691 | 6.01E-06 | 0.486842025 | 0.265 | 0.154 | 0.136601308 | qNSC |
| Eva1a1 | Eva1a | 6.32E-06 | 0.451606614 | 0.298 | 0.181 | 0.143586929 | qNSC |
| Fhit1 | Fhit | 7.05E-06 | 0.452666881 | 0.576 | 0.43 | 0.160122786 | qNSC |
| Abcd21 | Abcd2 | 7.60E-06 | 0.407427156 | 0.278 | 0.165 | 0.172683437 | qNSC |
| Wasf31 | Wasf3 | 7.63E-06 | 0.394773452 | 0.461 | 0.328 | 0.173362361 | qNSC |
| Acss2 | Acss2 | 8.18E-06 | 0.430146402 | 0.261 | 0.151 | 0.18577897 | qNSC |
| Aatk | Aatk | 8.33E-06 | 0.352028103 | 0.282 | 0.165 | 0.189265837 | qNSC |
| Ppp2r5a1 | Ppp2r5a | 8.64E-06 | 0.369196006 | 0.461 | 0.318 | 0.196250683 | qNSC |
| Scd2 | Scd2 | 8.98E-06 | 0.48048711 | 0.6 | 0.487 | 0.203994251 | qNSC |
| Bcan1 | Bcan | 9.00E-06 | 0.342898494 | 0.604 | 0.419 | 0.204314015 | qNSC |
| Slc9a91 | Slc9a9 | 9.30E-06 | 0.280504041 | 0.465 | 0.31 | 0.211200767 | qNSC |
| Fads21 | Fads2 | 9.42E-06 | 0.451268647 | 0.38 | 0.259 | 0.213994639 | qNSC |
| Cpeb2 | Cpeb2 | 9.87E-06 | 0.396378578 | 0.306 | 0.188 | 0.224289841 | qNSC |
| Adk1 | Adk | 1.11E-05 | 0.309980614 | 0.739 | 0.603 | 0.252338164 | qNSC |
| Kmt2c | Kmt2c | 1.16E-05 | 0.284655439 | 0.788 | 0.688 | 0.263607207 | qNSC |
| Gm351881 | Gm35188 | 1.19E-05 | 0.375432908 | 0.62 | 0.461 | 0.270964498 | qNSC |
| Wwp1 | Wwp1 | 1.21E-05 | 0.396956885 | 0.371 | 0.249 | 0.27478812 | qNSC |
| Ralyl1 | Ralyl | 1.27E-05 | 0.562643441 | 0.384 | 0.266 | 0.288204981 | qNSC |
| Tjp11 | Tjp1 | 1.28E-05 | 0.287507727 | 0.62 | 0.465 | 0.290052289 | qNSC |
| Vti1a | Vti1a | 1.33E-05 | 0.388454662 | 0.657 | 0.503 | 0.301851647 | qNSC |
| Mras1 | Mras | 1.42E-05 | 0.449078791 | 0.408 | 0.284 | 0.322436718 | qNSC |
| Acap21 | Acap2 | 1.45E-05 | 0.375585725 | 0.547 | 0.42 | 0.329449572 | qNSC |
| Jam2 | Jam2 | 1.52E-05 | 0.321651396 | 0.269 | 0.157 | 0.344377025 | qNSC |
| Rab301 | Rab30 | 1.80E-05 | 0.419967691 | 0.584 | 0.46 | 0.409586003 | qNSC |
| Adgrb1 | Adgrb1 | 2.00E-05 | 0.457604863 | 0.355 | 0.237 | 0.453142614 | qNSC |
| Dlc1 | Dlc1 | 2.16E-05 | 0.359449561 | 0.257 | 0.152 | 0.491269944 | qNSC |
| Arap22 | Arap2 | 2.23E-05 | 0.339107445 | 0.576 | 0.442 | 0.505936778 | qNSC |
| Atp2b2 | Atp2b2 | 2.28E-05 | 0.380166196 | 0.608 | 0.493 | 0.518740547 | qNSC |
| Cpeb31 | Cpeb3 | 2.31E-05 | 0.37275062 | 0.584 | 0.447 | 0.524598644 | qNSC |
| Epas11 | Epas1 | 2.32E-05 | 0.364514397 | 0.273 | 0.164 | 0.525833529 | qNSC |
| Reps1 | Reps1 | 2.55E-05 | 0.407294159 | 0.396 | 0.272 | 0.578662749 | qNSC |
| Diaph2 | Diaph2 | 2.74E-05 | 0.360118298 | 0.608 | 0.488 | 0.623324091 | qNSC |
| 2610507B11Rik | 2610507B11Rik | 2.85E-05 | 0.333816972 | 0.327 | 0.207 | 0.648381118 | qNSC |
| Pura | Pura | 2.92E-05 | 0.271591169 | 0.408 | 0.269 | 0.663051601 | qNSC |
| Cdh111 | Cdh11 | 3.04E-05 | 0.418662882 | 0.424 | 0.311 | 0.691610028 | qNSC |
| Park22 | Park2 | 3.45E-05 | 0.250872505 | 0.767 | 0.621 | 0.784232609 | qNSC |
| Bckdhb1 | Bckdhb | 3.99E-05 | 0.318943122 | 0.392 | 0.265 | 0.905487739 | qNSC |
| Anks1 | Anks1 | 4.06E-05 | 0.379107285 | 0.343 | 0.226 | 0.921679917 | qNSC |
| Tpcn1 | Tpcn1 | 4.22E-05 | 0.512195776 | 0.273 | 0.175 | 0.959619931 | qNSC |
| Stat5b | Stat5b | 4.45E-05 | 0.342901654 | 0.273 | 0.167 | 1 | qNSC |
| Asrgl11 | Asrgl1 | 4.68E-05 | 0.324140093 | 0.531 | 0.395 | 1 | qNSC |
| Kcnq1ot11 | Kcnq1ot1 | 4.98E-05 | 0.376334657 | 0.376 | 0.258 | 1 | qNSC |
| Wwox1 | Wwox | 5.05E-05 | 0.317896705 | 0.653 | 0.527 | 1 | qNSC |
| Cipc1 | Cipc | 5.38E-05 | 0.352429491 | 0.314 | 0.205 | 1 | qNSC |
| Slc27a11 | Slc27a1 | 5.56E-05 | 0.25588432 | 0.518 | 0.37 | 1 | qNSC |
| Fggy | Fggy | 5.58E-05 | 0.339681239 | 0.286 | 0.177 | 1 | qNSC |
| Prodh1 | Prodh | 5.81E-05 | 0.41064842 | 0.322 | 0.215 | 1 | qNSC |
| Ivd1 | Ivd | 6.50E-05 | 0.35681674 | 0.396 | 0.275 | 1 | qNSC |
| Hif3a2 | Hif3a | 7.31E-05 | 0.334220359 | 0.388 | 0.268 | 1 | qNSC |
| Cnnm21 | Cnnm2 | 8.82E-05 | 0.367088002 | 0.335 | 0.228 | 1 | qNSC |
| Galnt181 | Galnt18 | 9.69E-05 | 0.325057284 | 0.42 | 0.299 | 1 | qNSC |
| D130040H23Rik1 | D130040H23Rik | 0.000102153 | 0.354140693 | 0.412 | 0.291 | 1 | qNSC |
| Ncoa1 | Ncoa1 | 0.000102498 | 0.263272371 | 0.796 | 0.685 | 1 | qNSC |
| 2210408I21Rik | 2210408I21Rik | 0.000104463 | 0.38120346 | 0.461 | 0.351 | 1 | qNSC |
| Gna12 | Gna12 | 0.00010985 | 0.298930697 | 0.282 | 0.178 | 1 | qNSC |
| Thsd7a1 | Thsd7a | 0.000116369 | 0.347005197 | 0.429 | 0.314 | 1 | qNSC |
| Sertad2 | Sertad2 | 0.000120384 | 0.454613479 | 0.351 | 0.246 | 1 | qNSC |
| Vav31 | Vav3 | 0.000125275 | 0.396316591 | 0.31 | 0.204 | 1 | qNSC |
| Ubr5 | Ubr5 | 0.000126011 | 0.329370854 | 0.633 | 0.532 | 1 | qNSC |
| Adgrb2 | Adgrb2 | 0.000132638 | 0.345925299 | 0.261 | 0.165 | 1 | qNSC |
| Dlg51 | Dlg5 | 0.00013772 | 0.396219228 | 0.29 | 0.191 | 1 | qNSC |
| Chst111 | Chst11 | 0.000150256 | 0.32153467 | 0.38 | 0.265 | 1 | qNSC |
| Sorl1 | Sorl1 | 0.000161397 | 0.420359321 | 0.318 | 0.22 | 1 | qNSC |
| Rab311 | Rab31 | 0.000172361 | 0.345054959 | 0.424 | 0.305 | 1 | qNSC |
| Stim11 | Stim1 | 0.000180998 | 0.257131235 | 0.363 | 0.25 | 1 | qNSC |
| Crim11 | Crim1 | 0.000185582 | 0.29797963 | 0.363 | 0.242 | 1 | qNSC |
| Dnajc1 | Dnajc1 | 0.000221723 | 0.409027769 | 0.535 | 0.446 | 1 | qNSC |
| Capn21 | Capn2 | 0.000241187 | 0.363972692 | 0.314 | 0.207 | 1 | qNSC |
| Smarca21 | Smarca2 | 0.000281736 | 0.298186447 | 0.547 | 0.441 | 1 | qNSC |
| Parp8 | Parp8 | 0.000283817 | 0.391801323 | 0.31 | 0.21 | 1 | qNSC |
| Myo101 | Myo10 | 0.000293618 | 0.258730883 | 0.522 | 0.386 | 1 | qNSC |
| Shc31 | Shc3 | 0.000304612 | 0.290009958 | 0.416 | 0.296 | 1 | qNSC |
| Pclo | Pclo | 0.000306077 | 0.288134704 | 0.531 | 0.418 | 1 | qNSC |
| Chka | Chka | 0.000310606 | 0.349559398 | 0.441 | 0.333 | 1 | qNSC |
| Acer31 | Acer3 | 0.000348708 | 0.330714928 | 0.294 | 0.202 | 1 | qNSC |
| Timp31 | Timp3 | 0.000358673 | 0.273159041 | 0.465 | 0.334 | 1 | qNSC |
| Efr3b1 | Efr3b | 0.000365479 | 0.333776486 | 0.518 | 0.415 | 1 | qNSC |
| Sat11 | Sat1 | 0.000381508 | 0.344946565 | 0.261 | 0.17 | 1 | qNSC |
| Trp53bp21 | Trp53bp2 | 0.00040343 | 0.353844093 | 0.318 | 0.221 | 1 | qNSC |
| Ercc6l2 | Ercc6l2 | 0.000405695 | 0.388887922 | 0.269 | 0.186 | 1 | qNSC |
| Atp5o | Atp5o | 0.000412521 | 0.35415777 | 0.478 | 0.374 | 1 | qNSC |
| Fads1 | Fads1 | 0.00042786 | 0.310235877 | 0.269 | 0.178 | 1 | qNSC |
| Prex11 | Prex1 | 0.000445479 | 0.347952442 | 0.347 | 0.241 | 1 | qNSC |
| Ston22 | Ston2 | 0.000476141 | 0.310377219 | 0.522 | 0.39 | 1 | qNSC |
| Myo18a1 | Myo18a | 0.000483095 | 0.318132641 | 0.461 | 0.35 | 1 | qNSC |
| Grk41 | Grk4 | 0.000502291 | 0.255880369 | 0.265 | 0.171 | 1 | qNSC |
| Fam171a1 | Fam171a1 | 0.000525237 | 0.362944389 | 0.376 | 0.277 | 1 | qNSC |
| Vegfa1 | Vegfa | 0.000557429 | 0.267365096 | 0.343 | 0.238 | 1 | qNSC |
| Chchd3 | Chchd3 | 0.000568154 | 0.306929893 | 0.551 | 0.428 | 1 | qNSC |
| Acaca1 | Acaca | 0.000591015 | 0.27330951 | 0.604 | 0.499 | 1 | qNSC |
| Ptk2 | Ptk2 | 0.00062806 | 0.273129869 | 0.682 | 0.584 | 1 | qNSC |
| Pcca | Pcca | 0.000692591 | 0.257751735 | 0.478 | 0.357 | 1 | qNSC |
| Gabbr11 | Gabbr1 | 0.000705095 | 0.293613146 | 0.616 | 0.516 | 1 | qNSC |
| Pi4ka | Pi4ka | 0.00072109 | 0.306027252 | 0.441 | 0.35 | 1 | qNSC |
| Cdk19 | Cdk19 | 0.000751808 | 0.285262222 | 0.604 | 0.48 | 1 | qNSC |
| Sdha | Sdha | 0.000765483 | 0.257260419 | 0.355 | 0.255 | 1 | qNSC |
| Hip11 | Hip1 | 0.000786857 | 0.279513874 | 0.4 | 0.293 | 1 | qNSC |
| Fam228b2 | Fam228b | 0.000797698 | 0.317050101 | 0.343 | 0.245 | 1 | qNSC |
| Dennd4a | Dennd4a | 0.000805116 | 0.360765502 | 0.367 | 0.275 | 1 | qNSC |
| Cd81 | Cd81 | 0.000817137 | 0.386822758 | 0.429 | 0.332 | 1 | qNSC |
| Gprc5b1 | Gprc5b | 0.000911884 | 0.37409676 | 0.257 | 0.177 | 1 | qNSC |
| Tmod2 | Tmod2 | 0.000928666 | 0.267180158 | 0.437 | 0.327 | 1 | qNSC |
| Naaladl22 | Naaladl2 | 0.001105855 | 0.489483849 | 0.449 | 0.359 | 1 | qNSC |
| Cbs1 | Cbs | 0.001105924 | 0.2725513 | 0.269 | 0.182 | 1 | qNSC |
| Shisa41 | Shisa4 | 0.001148988 | 0.385751005 | 0.269 | 0.19 | 1 | qNSC |
| Rabgap1l | Rabgap1l | 0.001185422 | 0.284031612 | 0.641 | 0.548 | 1 | qNSC |
| Gtf2ird11 | Gtf2ird1 | 0.001229982 | 0.387191123 | 0.302 | 0.219 | 1 | qNSC |
| Snx25 | Snx25 | 0.001229986 | 0.350736713 | 0.294 | 0.212 | 1 | qNSC |
| Nat8f31 | Nat8f3 | 0.001299554 | 0.364290812 | 0.286 | 0.201 | 1 | qNSC |
| Zhx31 | Zhx3 | 0.001438618 | 0.276486818 | 0.547 | 0.459 | 1 | qNSC |
| Snrk1 | Snrk | 0.001465429 | 0.307622643 | 0.261 | 0.181 | 1 | qNSC |
| Lrba | Lrba | 0.001719966 | 0.269657303 | 0.616 | 0.509 | 1 | qNSC |
| Washc21 | Washc2 | 0.001727916 | 0.328363114 | 0.294 | 0.215 | 1 | qNSC |
| Polr3h | Polr3h | 0.001748927 | 0.31612509 | 0.257 | 0.175 | 1 | qNSC |
| Gm268351 | Gm26835 | 0.001759837 | 0.326989769 | 0.29 | 0.205 | 1 | qNSC |
| Sycp21 | Sycp2 | 0.001935629 | 0.274852027 | 0.269 | 0.187 | 1 | qNSC |
| Plxnb11 | Plxnb1 | 0.002317517 | 0.263302396 | 0.257 | 0.179 | 1 | qNSC |
| Asph1 | Asph | 0.002416814 | 0.32377836 | 0.343 | 0.257 | 1 | qNSC |
| Gabrg11 | Gabrg1 | 0.002592213 | 0.360504179 | 0.294 | 0.216 | 1 | qNSC |
| Itgav1 | Itgav | 0.002685401 | 0.299181815 | 0.331 | 0.244 | 1 | qNSC |
| Luzp1 | Luzp1 | 0.002734116 | 0.258889908 | 0.363 | 0.274 | 1 | qNSC |
| Chn1 | Chn1 | 0.002777232 | 0.263870641 | 0.514 | 0.425 | 1 | qNSC |
| Golgb11 | Golgb1 | 0.002778723 | 0.252557266 | 0.363 | 0.273 | 1 | qNSC |
| Tjp21 | Tjp2 | 0.002828989 | 0.290470577 | 0.327 | 0.247 | 1 | qNSC |
| Abhd12 | Abhd12 | 0.002903528 | 0.287592138 | 0.322 | 0.235 | 1 | qNSC |
| Nt5c21 | Nt5c2 | 0.003115461 | 0.263676603 | 0.522 | 0.434 | 1 | qNSC |
| Pced1b1 | Pced1b | 0.003198646 | 0.250105608 | 0.314 | 0.227 | 1 | qNSC |
| Klhl51 | Klhl5 | 0.003244517 | 0.259813879 | 0.314 | 0.234 | 1 | qNSC |
| Adcyap1r11 | Adcyap1r1 | 0.003459542 | 0.301486046 | 0.302 | 0.224 | 1 | qNSC |
| Ocrl | Ocrl | 0.003728784 | 0.299577092 | 0.371 | 0.289 | 1 | qNSC |
| Srpk2 | Srpk2 | 0.003739627 | 0.258915307 | 0.576 | 0.497 | 1 | qNSC |
| Zfp277 | Zfp277 | 0.00401023 | 0.285932293 | 0.257 | 0.186 | 1 | qNSC |
| Peak1 | Peak1 | 0.004491227 | 0.257175669 | 0.416 | 0.334 | 1 | qNSC |
| Sgms11 | Sgms1 | 0.004752944 | 0.26810153 | 0.306 | 0.225 | 1 | qNSC |
| Shroom41 | Shroom4 | 0.005281157 | 0.267063379 | 0.318 | 0.239 | 1 | qNSC |
| Slc10a7 | Slc10a7 | 0.005695732 | 0.313158332 | 0.302 | 0.226 | 1 | qNSC |
| Tmem471 | Tmem47 | 0.006316623 | 0.304166301 | 0.424 | 0.349 | 1 | qNSC |
| Cs | Cs | 0.006848513 | 0.295529917 | 0.286 | 0.213 | 1 | qNSC |
| Lingo2 | Lingo2 | 0.007243884 | 0.259633176 | 0.51 | 0.432 | 1 | qNSC |
| 9530026P05Rik1 | 9530026P05Rik | 0.007970332 | 0.297028698 | 0.282 | 0.205 | 1 | qNSC |
| Cdc37l1 | Cdc37l1 | 0.008582354 | 0.255598614 | 0.424 | 0.36 | 1 | qNSC |
| Top2a | Top2a | 3.24E-241 | 2.718821009 | 0.646 | 0.01 | 7.37E-237 | late aNSCs |
| Kif11 | Kif11 | 4.04E-198 | 2.043607798 | 0.516 | 0.006 | 9.17E-194 | late aNSCs |
| Knl1 | Knl1 | 3.19E-190 | 2.063644371 | 0.534 | 0.01 | 7.25E-186 | late aNSCs |
| Efcab11 | Efcab11 | 6.55E-190 | 2.139654123 | 0.565 | 0.014 | 1.49E-185 | late aNSCs |
| Cdk6 | Cdk6 | 1.50E-183 | 2.631591287 | 0.627 | 0.025 | 3.41E-179 | late aNSCs |
| Kif15 | Kif15 | 1.83E-182 | 1.892885109 | 0.522 | 0.011 | 4.16E-178 | late aNSCs |
| Ttk | Ttk | 1.23E-178 | 1.450829839 | 0.422 | 0.002 | 2.79E-174 | late aNSCs |
| Neil3 | Neil3 | 6.50E-178 | 1.825312475 | 0.46 | 0.005 | 1.48E-173 | late aNSCs |
| Lockd | Lockd | 8.61E-177 | 2.355500019 | 0.565 | 0.018 | 1.96E-172 | late aNSCs |
| Kntc1 | Kntc1 | 2.19E-176 | 1.495495811 | 0.435 | 0.003 | 4.97E-172 | late aNSCs |
| Mms22l | Mms22l | 2.23E-167 | 2.297693111 | 0.665 | 0.039 | 5.07E-163 | late aNSCs |
| Cdca2 | Cdca2 | 2.08E-165 | 1.400895586 | 0.422 | 0.004 | 4.73E-161 | late aNSCs |
| Brip1 | Brip1 | 1.33E-161 | 1.688544298 | 0.472 | 0.01 | 3.02E-157 | late aNSCs |
| Rad51b | Rad51b | 4.15E-160 | 2.414053197 | 0.621 | 0.034 | 9.43E-156 | late aNSCs |
| Rmi2 | Rmi2 | 5.89E-160 | 1.388584349 | 0.41 | 0.004 | 1.34E-155 | late aNSCs |
| Mki67 | Mki67 | 1.54E-155 | 1.636329484 | 0.441 | 0.008 | 3.49E-151 | late aNSCs |
| Dtl | Dtl | 6.17E-155 | 1.612787783 | 0.398 | 0.004 | 1.40E-150 | late aNSCs |
| Mis18bp1 | Mis18bp1 | 7.01E-150 | 1.5286864 | 0.398 | 0.005 | 1.59E-145 | late aNSCs |
| Kif23 | Kif23 | 4.27E-147 | 1.526086427 | 0.391 | 0.005 | 9.71E-143 | late aNSCs |
| Ckap2 | Ckap2 | 3.71E-140 | 1.193121141 | 0.36 | 0.004 | 8.42E-136 | late aNSCs |
| Atad2 | Atad2 | 1.26E-139 | 2.146214457 | 0.596 | 0.039 | 2.87E-135 | late aNSCs |
| Ect2 | Ect2 | 1.88E-138 | 1.397917834 | 0.373 | 0.005 | 4.26E-134 | late aNSCs |
| Brca1 | Brca1 | 2.05E-135 | 1.471856541 | 0.41 | 0.01 | 4.66E-131 | late aNSCs |
| Rtkn2 | Rtkn2 | 7.78E-135 | 1.416821124 | 0.398 | 0.009 | 1.77E-130 | late aNSCs |
| Ndc80 | Ndc80 | 4.40E-134 | 1.159242039 | 0.335 | 0.003 | 9.99E-130 | late aNSCs |
| Stil | Stil | 7.31E-134 | 1.390676962 | 0.416 | 0.011 | 1.66E-129 | late aNSCs |
| Clspn | Clspn | 5.91E-132 | 1.417158372 | 0.385 | 0.008 | 1.34E-127 | late aNSCs |
| E2f7 | E2f7 | 1.97E-131 | 1.255012771 | 0.373 | 0.007 | 4.47E-127 | late aNSCs |
| Esco2 | Esco2 | 2.50E-131 | 1.176554957 | 0.323 | 0.002 | 5.68E-127 | late aNSCs |
| Kif4 | Kif4 | 5.91E-128 | 1.349850548 | 0.354 | 0.006 | 1.34E-123 | late aNSCs |
| Shcbp1 | Shcbp1 | 9.77E-126 | 0.956650714 | 0.298 | 0.001 | 2.22E-121 | late aNSCs |
| Tpx2 | Tpx2 | 1.40E-125 | 1.350005247 | 0.385 | 0.01 | 3.17E-121 | late aNSCs |
| Cenpf | Cenpf | 2.33E-123 | 1.530251376 | 0.348 | 0.006 | 5.30E-119 | late aNSCs |
| Zgrf1 | Zgrf1 | 1.99E-122 | 1.552194585 | 0.503 | 0.029 | 4.51E-118 | late aNSCs |
| Prc1 | Prc1 | 3.01E-120 | 1.312795891 | 0.366 | 0.009 | 6.83E-116 | late aNSCs |
| Ncapg2 | Ncapg2 | 3.98E-118 | 1.440048589 | 0.46 | 0.023 | 9.04E-114 | late aNSCs |
| Bub1 | Bub1 | 4.42E-118 | 0.919704883 | 0.267 | 0 | 1.00E-113 | late aNSCs |
| Zwilch | Zwilch | 4.57E-117 | 1.162440078 | 0.36 | 0.009 | 1.04E-112 | late aNSCs |
| Rad54b | Rad54b | 1.87E-115 | 1.135802825 | 0.416 | 0.017 | 4.24E-111 | late aNSCs |
| Ckap2l | Ckap2l | 2.13E-115 | 1.098007939 | 0.298 | 0.003 | 4.83E-111 | late aNSCs |
| Smc4 | Smc4 | 2.18E-115 | 1.913635475 | 0.634 | 0.065 | 4.96E-111 | late aNSCs |
| Rbl1 | Rbl1 | 2.84E-115 | 1.342083949 | 0.478 | 0.027 | 6.46E-111 | late aNSCs |
| Wdhd1 | Wdhd1 | 5.74E-113 | 1.347621083 | 0.441 | 0.022 | 1.30E-108 | late aNSCs |
| Cenpp | Cenpp | 8.68E-112 | 2.358396072 | 0.683 | 0.087 | 1.97E-107 | late aNSCs |
| Kif18a | Kif18a | 8.73E-110 | 1.251610202 | 0.366 | 0.012 | 1.98E-105 | late aNSCs |
| Melk | Melk | 1.04E-109 | 0.899485373 | 0.286 | 0.003 | 2.35E-105 | late aNSCs |
| Cenpk | Cenpk | 1.34E-109 | 1.271905984 | 0.342 | 0.009 | 3.05E-105 | late aNSCs |
| Aspm | Aspm | 1.43E-109 | 1.287875137 | 0.329 | 0.008 | 3.24E-105 | late aNSCs |
| Polq | Polq | 3.64E-108 | 1.373455114 | 0.422 | 0.021 | 8.27E-104 | late aNSCs |
| Depdc1b | Depdc1b | 6.97E-104 | 0.942873143 | 0.255 | 0.002 | 1.58E-99 | late aNSCs |
| E2f2 | E2f2 | 9.68E-104 | 0.847631124 | 0.255 | 0.002 | 2.20E-99 | late aNSCs |
| Racgap1 | Racgap1 | 2.61E-103 | 1.29586342 | 0.342 | 0.011 | 5.93E-99 | late aNSCs |
| Pclaf | Pclaf | 2.63E-103 | 1.391069026 | 0.441 | 0.027 | 5.98E-99 | late aNSCs |
| Lmnb11 | Lmnb1 | 2.31E-101 | 1.748236714 | 0.671 | 0.087 | 5.24E-97 | late aNSCs |
| Kif20b | Kif20b | 1.39E-100 | 1.128203131 | 0.317 | 0.009 | 3.16E-96 | late aNSCs |
| Cenph | Cenph | 6.44E-100 | 0.998053195 | 0.298 | 0.007 | 1.46E-95 | late aNSCs |
| Ncapg | Ncapg | 1.30E-98 | 0.787799709 | 0.255 | 0.003 | 2.96E-94 | late aNSCs |
| Fancd2 | Fancd2 | 2.52E-94 | 0.848238967 | 0.286 | 0.007 | 5.73E-90 | late aNSCs |
| Aim2 | Aim2 | 1.42E-93 | 1.63919295 | 0.491 | 0.043 | 3.22E-89 | late aNSCs |
| Birc5 | Birc5 | 1.39E-90 | 0.858215014 | 0.267 | 0.006 | 3.15E-86 | late aNSCs |
| Smc2 | Smc2 | 5.02E-90 | 1.349232125 | 0.46 | 0.038 | 1.14E-85 | late aNSCs |
| Cenpe | Cenpe | 5.40E-90 | 1.20032097 | 0.273 | 0.007 | 1.23E-85 | late aNSCs |
| Rad51 | Rad51 | 1.34E-89 | 0.970138491 | 0.335 | 0.015 | 3.04E-85 | late aNSCs |
| Nusap1 | Nusap1 | 5.80E-87 | 1.44653769 | 0.404 | 0.029 | 1.32E-82 | late aNSCs |
| Pola11 | Pola1 | 2.73E-86 | 2.257608558 | 0.795 | 0.182 | 6.21E-82 | late aNSCs |
| Rad54l | Rad54l | 2.84E-86 | 1.02076143 | 0.273 | 0.008 | 6.44E-82 | late aNSCs |
| Bard1 | Bard1 | 1.15E-85 | 0.987505096 | 0.292 | 0.01 | 2.62E-81 | late aNSCs |
| Fanci | Fanci | 3.12E-85 | 0.980865564 | 0.28 | 0.009 | 7.08E-81 | late aNSCs |
| Kifc1 | Kifc1 | 1.73E-80 | 0.909792018 | 0.28 | 0.01 | 3.92E-76 | late aNSCs |
| Ezh21 | Ezh2 | 2.80E-79 | 1.773573436 | 0.826 | 0.194 | 6.36E-75 | late aNSCs |
| Diaph3 | Diaph3 | 3.44E-79 | 2.092741866 | 0.689 | 0.137 | 7.82E-75 | late aNSCs |
| Rad18 | Rad18 | 4.64E-78 | 1.218191656 | 0.398 | 0.032 | 1.05E-73 | late aNSCs |
| Mastl | Mastl | 1.63E-74 | 0.985384531 | 0.329 | 0.02 | 3.71E-70 | late aNSCs |
| Nsd21 | Nsd2 | 2.92E-74 | 1.972175663 | 0.882 | 0.289 | 6.64E-70 | late aNSCs |
| Ephb21 | Ephb2 | 9.40E-74 | 1.486417025 | 0.621 | 0.1 | 2.13E-69 | late aNSCs |
| Blm | Blm | 8.99E-73 | 1.215373632 | 0.429 | 0.043 | 2.04E-68 | late aNSCs |
| Ccnd21 | Ccnd2 | 1.56E-72 | 1.787429838 | 0.832 | 0.212 | 3.53E-68 | late aNSCs |
| Ncapd2 | Ncapd2 | 5.57E-71 | 1.433534184 | 0.484 | 0.062 | 1.26E-66 | late aNSCs |
| Pole | Pole | 6.57E-71 | 0.908217229 | 0.28 | 0.014 | 1.49E-66 | late aNSCs |
| Anln | Anln | 9.71E-71 | 1.060346254 | 0.342 | 0.025 | 2.21E-66 | late aNSCs |
| Prim2 | Prim2 | 1.48E-70 | 1.470761505 | 0.522 | 0.075 | 3.36E-66 | late aNSCs |
| Kifc5b | Kifc5b | 1.83E-70 | 0.814428668 | 0.261 | 0.011 | 4.15E-66 | late aNSCs |
| Nasp | Nasp | 8.30E-70 | 1.602286605 | 0.621 | 0.113 | 1.89E-65 | late aNSCs |
| Tyms | Tyms | 3.24E-69 | 0.935037424 | 0.304 | 0.019 | 7.35E-65 | late aNSCs |
| Rrm1 | Rrm1 | 1.60E-68 | 1.04594969 | 0.317 | 0.022 | 3.64E-64 | late aNSCs |
| Hells | Hells | 6.15E-68 | 1.177642827 | 0.342 | 0.027 | 1.40E-63 | late aNSCs |
| Rbbp8 | Rbbp8 | 4.34E-66 | 1.267007595 | 0.391 | 0.04 | 9.86E-62 | late aNSCs |
| Hat1 | Hat1 | 7.37E-65 | 1.469845331 | 0.534 | 0.086 | 1.67E-60 | late aNSCs |
| Chd7 | Chd7 | 3.42E-64 | 1.846070834 | 0.919 | 0.396 | 7.77E-60 | late aNSCs |
| Lig1 | Lig1 | 2.10E-63 | 1.002430532 | 0.261 | 0.014 | 4.78E-59 | late aNSCs |
| Prim1 | Prim1 | 1.41E-62 | 1.023326524 | 0.335 | 0.029 | 3.20E-58 | late aNSCs |
| Sema5b | Sema5b | 4.70E-62 | 1.59832746 | 0.522 | 0.087 | 1.07E-57 | late aNSCs |
| Lima1 | Lima1 | 1.80E-61 | 1.848651256 | 0.64 | 0.141 | 4.10E-57 | late aNSCs |
| Wdr76 | Wdr76 | 4.03E-61 | 1.133413978 | 0.366 | 0.038 | 9.15E-57 | late aNSCs |
| Miat1 | Miat | 5.76E-61 | 2.060180865 | 0.665 | 0.155 | 1.31E-56 | late aNSCs |
| Gm29260 | Gm29260 | 6.75E-61 | 2.341193569 | 0.416 | 0.054 | 1.53E-56 | late aNSCs |
| Mcm6 | Mcm6 | 1.70E-60 | 0.930484482 | 0.298 | 0.022 | 3.87E-56 | late aNSCs |
| Wee1 | Wee1 | 6.91E-60 | 0.879508013 | 0.311 | 0.025 | 1.57E-55 | late aNSCs |
| Chek2 | Chek2 | 6.57E-59 | 0.848035171 | 0.261 | 0.016 | 1.49E-54 | late aNSCs |
| Prag1 | Prag1 | 1.74E-58 | 1.257009384 | 0.41 | 0.052 | 3.94E-54 | late aNSCs |
| Tmpo1 | Tmpo | 5.61E-58 | 1.483950162 | 0.683 | 0.17 | 1.27E-53 | late aNSCs |
| Mtbp | Mtbp | 3.14E-57 | 1.016492096 | 0.36 | 0.039 | 7.12E-53 | late aNSCs |
| Nemp1 | Nemp1 | 5.65E-57 | 0.95883668 | 0.366 | 0.04 | 1.28E-52 | late aNSCs |
| Dek | Dek | 1.59E-56 | 1.321686709 | 0.571 | 0.112 | 3.61E-52 | late aNSCs |
| Nell21 | Nell2 | 1.30E-55 | 1.949316201 | 0.795 | 0.263 | 2.96E-51 | late aNSCs |
| Plk4 | Plk4 | 7.42E-55 | 0.784025594 | 0.267 | 0.019 | 1.69E-50 | late aNSCs |
| Atad5 | Atad5 | 1.95E-54 | 1.253341246 | 0.472 | 0.078 | 4.43E-50 | late aNSCs |
| Pip5k1b | Pip5k1b | 1.04E-53 | 1.42571534 | 0.422 | 0.062 | 2.37E-49 | late aNSCs |
| Tox31 | Tox3 | 3.29E-53 | 1.418625364 | 0.876 | 0.288 | 7.48E-49 | late aNSCs |
| Elavl41 | Elavl4 | 4.48E-52 | 1.520942406 | 0.627 | 0.148 | 1.02E-47 | late aNSCs |
| Ncapd3 | Ncapd3 | 4.70E-52 | 1.215493378 | 0.497 | 0.089 | 1.07E-47 | late aNSCs |
| Pak31 | Pak3 | 1.13E-51 | 1.932934368 | 0.801 | 0.277 | 2.56E-47 | late aNSCs |
| Slit11 | Slit1 | 2.55E-51 | 1.585354147 | 0.522 | 0.102 | 5.80E-47 | late aNSCs |
| Hmgb2 | Hmgb2 | 2.84E-51 | 0.773588794 | 0.304 | 0.03 | 6.45E-47 | late aNSCs |
| Kif24 | Kif24 | 6.58E-51 | 1.220995135 | 0.466 | 0.08 | 1.49E-46 | late aNSCs |
| Pde3b | Pde3b | 2.03E-50 | 1.160542041 | 0.46 | 0.079 | 4.61E-46 | late aNSCs |
| Cep192 | Cep192 | 4.80E-50 | 1.230083964 | 0.534 | 0.109 | 1.09E-45 | late aNSCs |
| Dscaml11 | Dscaml1 | 1.68E-49 | 1.76685121 | 0.752 | 0.228 | 3.82E-45 | late aNSCs |
| Hjurp | Hjurp | 9.29E-49 | 1.37054314 | 0.553 | 0.125 | 2.11E-44 | late aNSCs |
| Epha31 | Epha3 | 4.63E-48 | 1.838993963 | 0.578 | 0.141 | 1.05E-43 | late aNSCs |
| Topbp1 | Topbp1 | 7.19E-48 | 1.061431022 | 0.366 | 0.051 | 1.63E-43 | late aNSCs |
| Brip1os | Brip1os | 7.21E-48 | 1.537324529 | 0.702 | 0.208 | 1.64E-43 | late aNSCs |
| Setbp11 | Setbp1 | 1.03E-46 | 1.635303329 | 0.988 | 0.68 | 2.35E-42 | late aNSCs |
| Coro1c | Coro1c | 1.71E-46 | 1.144474685 | 0.447 | 0.08 | 3.89E-42 | late aNSCs |
| E2f3 | E2f3 | 4.53E-45 | 1.4911834 | 0.596 | 0.158 | 1.03E-40 | late aNSCs |
| Sae1 | Sae1 | 2.22E-44 | 1.147973192 | 0.503 | 0.107 | 5.03E-40 | late aNSCs |
| St3gal1 | St3gal1 | 7.53E-44 | 1.120351848 | 0.292 | 0.035 | 1.71E-39 | late aNSCs |
| Syne21 | Syne2 | 9.74E-44 | 1.290744134 | 0.677 | 0.197 | 2.21E-39 | late aNSCs |
| Brca2 | Brca2 | 7.31E-43 | 0.869863982 | 0.273 | 0.03 | 1.66E-38 | late aNSCs |
| Slf1 | Slf1 | 2.87E-42 | 1.13233752 | 0.615 | 0.166 | 6.51E-38 | late aNSCs |
| Haus6 | Haus6 | 3.05E-42 | 0.869308622 | 0.298 | 0.037 | 6.92E-38 | late aNSCs |
| Spag5 | Spag5 | 3.57E-42 | 0.755491684 | 0.255 | 0.026 | 8.10E-38 | late aNSCs |
| Myo1b | Myo1b | 8.91E-41 | 1.092332706 | 0.416 | 0.078 | 2.02E-36 | late aNSCs |
| Tipin | Tipin | 1.12E-40 | 0.838404887 | 0.342 | 0.051 | 2.54E-36 | late aNSCs |
| Slc25a13 | Slc25a13 | 1.19E-40 | 0.90926162 | 0.267 | 0.031 | 2.70E-36 | late aNSCs |
| Mdc1 | Mdc1 | 1.72E-40 | 0.731547381 | 0.298 | 0.038 | 3.90E-36 | late aNSCs |
| Tmem131l1 | Tmem131l | 1.84E-40 | 1.1179741 | 0.764 | 0.246 | 4.18E-36 | late aNSCs |
| Xpo1 | Xpo1 | 1.17E-39 | 1.243431416 | 0.745 | 0.273 | 2.65E-35 | late aNSCs |
| Mob3b1 | Mob3b | 2.61E-39 | 1.35066555 | 0.59 | 0.164 | 5.94E-35 | late aNSCs |
| Myt11 | Myt1 | 3.50E-39 | 1.060566825 | 0.478 | 0.103 | 7.95E-35 | late aNSCs |
| Lin9 | Lin9 | 1.39E-38 | 0.723245381 | 0.311 | 0.044 | 3.17E-34 | late aNSCs |
| Edar | Edar | 7.08E-38 | 0.900454268 | 0.298 | 0.042 | 1.61E-33 | late aNSCs |
| Ska2 | Ska2 | 7.40E-38 | 0.851422784 | 0.348 | 0.057 | 1.68E-33 | late aNSCs |
| Tbc1d31 | Tbc1d31 | 1.97E-37 | 0.959300831 | 0.429 | 0.089 | 4.48E-33 | late aNSCs |
| Slbp | Slbp | 3.71E-37 | 0.790454939 | 0.311 | 0.046 | 8.43E-33 | late aNSCs |
| Dlx11 | Dlx1 | 6.22E-37 | 1.076940144 | 0.46 | 0.103 | 1.41E-32 | late aNSCs |
| Pdzrn4 | Pdzrn4 | 6.35E-37 | 1.148589394 | 0.466 | 0.108 | 1.44E-32 | late aNSCs |
| Adgrv11 | Adgrv1 | 1.15E-36 | 1.435548475 | 0.484 | 0.122 | 2.61E-32 | late aNSCs |
| Cep128 | Cep128 | 1.29E-36 | 1.26577576 | 0.602 | 0.185 | 2.94E-32 | late aNSCs |
| Mphosph9 | Mphosph9 | 1.62E-35 | 1.20275893 | 0.547 | 0.156 | 3.67E-31 | late aNSCs |
| Sncaip1 | Sncaip | 4.23E-35 | 1.595147017 | 0.702 | 0.272 | 9.60E-31 | late aNSCs |
| Kcnh71 | Kcnh7 | 4.89E-35 | 1.427748436 | 0.745 | 0.297 | 1.11E-30 | late aNSCs |
| Arx1 | Arx | 6.18E-35 | 1.254488004 | 0.422 | 0.095 | 1.40E-30 | late aNSCs |
| Ints7 | Ints7 | 6.97E-35 | 0.99882343 | 0.429 | 0.095 | 1.58E-30 | late aNSCs |
| Zbtb201 | Zbtb20 | 8.06E-35 | 0.799738917 | 1 | 0.995 | 1.83E-30 | late aNSCs |
| 1600010M07Rik | 1600010M07Rik | 2.53E-34 | 1.015446138 | 0.491 | 0.125 | 5.75E-30 | late aNSCs |
| Dlx1as1 | Dlx1as | 4.72E-34 | 1.24292508 | 0.441 | 0.104 | 1.07E-29 | late aNSCs |
| Mthfd1l | Mthfd1l | 6.65E-34 | 0.989556702 | 0.311 | 0.053 | 1.51E-29 | late aNSCs |
| Cdk5rap2 | Cdk5rap2 | 7.76E-34 | 1.094505547 | 0.602 | 0.198 | 1.76E-29 | late aNSCs |
| Fkbp5 | Fkbp5 | 1.57E-33 | 0.891858666 | 0.354 | 0.067 | 3.56E-29 | late aNSCs |
| Bcl11a1 | Bcl11a | 1.97E-33 | 1.041524721 | 0.77 | 0.286 | 4.47E-29 | late aNSCs |
| Mcph1 | Mcph1 | 2.17E-33 | 0.974929004 | 0.478 | 0.121 | 4.93E-29 | late aNSCs |
| Cep135 | Cep135 | 2.63E-33 | 0.765988203 | 0.348 | 0.065 | 5.97E-29 | late aNSCs |
| Vrk1 | Vrk1 | 2.94E-33 | 0.871746995 | 0.354 | 0.069 | 6.67E-29 | late aNSCs |
| Cdca7 | Cdca7 | 8.03E-33 | 0.946106369 | 0.366 | 0.074 | 1.82E-28 | late aNSCs |
| Gm47283 | Gm47283 | 8.35E-33 | 1.09901021 | 0.46 | 0.118 | 1.90E-28 | late aNSCs |
| H2afv | H2afv | 8.40E-33 | 0.926658107 | 0.472 | 0.116 | 1.91E-28 | late aNSCs |
| Tead11 | Tead1 | 1.27E-32 | 1.323125806 | 0.876 | 0.56 | 2.89E-28 | late aNSCs |
| Clic4 | Clic4 | 6.24E-32 | 0.862942681 | 0.503 | 0.133 | 1.42E-27 | late aNSCs |
| Dgcr8 | Dgcr8 | 6.50E-32 | 0.910180607 | 0.472 | 0.121 | 1.48E-27 | late aNSCs |
| Lin54 | Lin54 | 7.25E-32 | 0.791672936 | 0.342 | 0.065 | 1.65E-27 | late aNSCs |
| Nespas | Nespas | 1.91E-31 | 0.661486242 | 0.255 | 0.037 | 4.33E-27 | late aNSCs |
| Cep152 | Cep152 | 2.99E-31 | 0.710781986 | 0.311 | 0.055 | 6.79E-27 | late aNSCs |
| Zfp536 | Zfp536 | 2.09E-30 | 0.854849376 | 0.379 | 0.083 | 4.75E-26 | late aNSCs |
| Egfros | Egfros | 3.99E-30 | 1.182645566 | 0.304 | 0.059 | 9.06E-26 | late aNSCs |
| Cit1 | Cit | 4.85E-30 | 1.085029492 | 0.484 | 0.142 | 1.10E-25 | late aNSCs |
| Smc1a | Smc1a | 8.78E-30 | 0.842182641 | 0.422 | 0.104 | 2.00E-25 | late aNSCs |
| Ndc1 | Ndc1 | 1.99E-29 | 0.59783936 | 0.273 | 0.045 | 4.53E-25 | late aNSCs |
| Zeb21 | Zeb2 | 2.46E-29 | 1.130099678 | 0.944 | 0.701 | 5.60E-25 | late aNSCs |
| AW5549181 | AW554918 | 2.52E-29 | 1.179597415 | 0.733 | 0.335 | 5.73E-25 | late aNSCs |
| Rif1 | Rif1 | 3.63E-29 | 0.966477195 | 0.615 | 0.214 | 8.24E-25 | late aNSCs |
| Epb41 | Epb41 | 5.40E-29 | 1.064403589 | 0.565 | 0.19 | 1.23E-24 | late aNSCs |
| Usp37 | Usp37 | 1.05E-28 | 1.017181809 | 0.671 | 0.253 | 2.38E-24 | late aNSCs |
| Nfix1 | Nfix | 1.30E-28 | 0.957271581 | 0.814 | 0.371 | 2.95E-24 | late aNSCs |
| G2e3 | G2e3 | 1.97E-28 | 0.986899761 | 0.404 | 0.103 | 4.47E-24 | late aNSCs |
| Rnaseh2b | Rnaseh2b | 2.81E-28 | 0.767239687 | 0.323 | 0.065 | 6.38E-24 | late aNSCs |
| Ssh21 | Ssh2 | 6.77E-28 | 0.94677283 | 0.863 | 0.474 | 1.54E-23 | late aNSCs |
| Rttn | Rttn | 1.32E-27 | 0.899232573 | 0.447 | 0.124 | 3.00E-23 | late aNSCs |
| 4930503L19Rik | 4930503L19Rik | 1.33E-27 | 0.722674543 | 0.28 | 0.052 | 3.01E-23 | late aNSCs |
| Sox111 | Sox11 | 1.54E-27 | 1.056993929 | 0.609 | 0.215 | 3.50E-23 | late aNSCs |
| Baz1a | Baz1a | 1.64E-27 | 0.789336142 | 0.267 | 0.047 | 3.73E-23 | late aNSCs |
| Brd8 | Brd8 | 2.08E-27 | 0.94705901 | 0.602 | 0.213 | 4.72E-23 | late aNSCs |
| Cep83 | Cep83 | 2.12E-27 | 0.841809151 | 0.509 | 0.153 | 4.81E-23 | late aNSCs |
| Rfwd3 | Rfwd3 | 2.17E-27 | 0.796730032 | 0.466 | 0.131 | 4.92E-23 | late aNSCs |
| Phip1 | Phip | 2.31E-27 | 0.988990073 | 0.894 | 0.528 | 5.25E-23 | late aNSCs |
| Map21 | Map2 | 6.33E-27 | 0.844018226 | 0.981 | 0.815 | 1.44E-22 | late aNSCs |
| Tgfbr1 | Tgfbr1 | 1.03E-26 | 0.894020067 | 0.447 | 0.127 | 2.35E-22 | late aNSCs |
| Aff31 | Aff3 | 1.35E-26 | 0.942540518 | 0.758 | 0.338 | 3.07E-22 | late aNSCs |
| Cbx5 | Cbx5 | 1.90E-26 | 0.966529805 | 0.739 | 0.33 | 4.31E-22 | late aNSCs |
| Sfmbt1 | Sfmbt1 | 3.16E-26 | 0.979688522 | 0.634 | 0.247 | 7.18E-22 | late aNSCs |
| Rccd1 | Rccd1 | 3.25E-26 | 0.722701598 | 0.298 | 0.06 | 7.39E-22 | late aNSCs |
| Pold3 | Pold3 | 3.51E-26 | 0.741043749 | 0.335 | 0.076 | 7.96E-22 | late aNSCs |
| Tcf201 | Tcf20 | 5.01E-26 | 0.966466422 | 0.795 | 0.393 | 1.14E-21 | late aNSCs |
| Nin1 | Nin | 5.69E-26 | 0.819731788 | 0.497 | 0.149 | 1.29E-21 | late aNSCs |
| Sass6 | Sass6 | 1.09E-25 | 0.584398337 | 0.255 | 0.045 | 2.47E-21 | late aNSCs |
| Skp2 | Skp2 | 2.24E-25 | 0.730572952 | 0.28 | 0.056 | 5.08E-21 | late aNSCs |
| Atp11c1 | Atp11c | 2.51E-25 | 1.013002309 | 0.64 | 0.26 | 5.71E-21 | late aNSCs |
| Efna5 | Efna5 | 3.79E-25 | 1.636840617 | 0.621 | 0.256 | 8.62E-21 | late aNSCs |
| Pou2f11 | Pou2f1 | 3.83E-25 | 1.033481794 | 0.888 | 0.671 | 8.70E-21 | late aNSCs |
| Elavl21 | Elavl2 | 5.27E-25 | 0.835085247 | 0.534 | 0.177 | 1.20E-20 | late aNSCs |
| Cep57l1 | Cep57l1 | 1.09E-24 | 0.796358709 | 0.354 | 0.088 | 2.47E-20 | late aNSCs |
| 2700049A03Rik | 2700049A03Rik | 1.23E-24 | 0.864278127 | 0.466 | 0.144 | 2.79E-20 | late aNSCs |
| Gstcd | Gstcd | 1.38E-24 | 0.654679271 | 0.298 | 0.063 | 3.13E-20 | late aNSCs |
| Myef21 | Myef2 | 1.43E-24 | 0.850493713 | 0.553 | 0.193 | 3.24E-20 | late aNSCs |
| Cntln1 | Cntln | 1.60E-24 | 0.944381191 | 0.509 | 0.174 | 3.63E-20 | late aNSCs |
| Trim21 | Trim2 | 1.78E-24 | 1.096086719 | 0.839 | 0.49 | 4.05E-20 | late aNSCs |
| Cbx3 | Cbx3 | 2.17E-24 | 0.794041322 | 0.404 | 0.111 | 4.94E-20 | late aNSCs |
| Spidr | Spidr | 2.43E-24 | 0.949716517 | 0.416 | 0.123 | 5.51E-20 | late aNSCs |
| Map4k41 | Map4k4 | 2.62E-24 | 0.864856315 | 0.876 | 0.524 | 5.95E-20 | late aNSCs |
| Egfr1 | Egfr | 2.64E-24 | 2.393949381 | 0.671 | 0.386 | 6.00E-20 | late aNSCs |
| Magi11 | Magi1 | 6.00E-24 | 0.984168886 | 0.901 | 0.655 | 1.36E-19 | late aNSCs |
| Uhrf21 | Uhrf2 | 6.81E-24 | 0.957852928 | 0.689 | 0.305 | 1.55E-19 | late aNSCs |
| C530008M17Rik1 | C530008M17Rik | 2.63E-23 | 0.862263589 | 0.683 | 0.294 | 5.97E-19 | late aNSCs |
| Syncrip1 | Syncrip | 2.92E-23 | 0.788002775 | 0.559 | 0.2 | 6.62E-19 | late aNSCs |
| Ncor2 | Ncor2 | 4.04E-23 | 1.055749685 | 0.54 | 0.203 | 9.16E-19 | late aNSCs |
| Tfdp1 | Tfdp1 | 4.18E-23 | 0.793272923 | 0.329 | 0.082 | 9.49E-19 | late aNSCs |
| 1-Sep | 1-Sep | 4.23E-23 | 0.689042932 | 0.261 | 0.053 | 9.62E-19 | late aNSCs |
| Alg13 | Alg13 | 6.83E-23 | 0.565878891 | 0.267 | 0.055 | 1.55E-18 | late aNSCs |
| Zc3h12c1 | Zc3h12c | 7.49E-23 | 0.823159745 | 0.528 | 0.184 | 1.70E-18 | late aNSCs |
| Cep295 | Cep295 | 7.79E-23 | 0.750315429 | 0.366 | 0.1 | 1.77E-18 | late aNSCs |
| Pbrm11 | Pbrm1 | 9.58E-23 | 0.967427015 | 0.77 | 0.424 | 2.18E-18 | late aNSCs |
| Dclk21 | Dclk2 | 1.50E-22 | 1.125166243 | 0.745 | 0.426 | 3.41E-18 | late aNSCs |
| Evl1 | Evl | 1.82E-22 | 0.750017701 | 0.646 | 0.251 | 4.14E-18 | late aNSCs |
| Itgb3bp | Itgb3bp | 2.05E-22 | 0.822538915 | 0.484 | 0.161 | 4.65E-18 | late aNSCs |
| Cep85 | Cep85 | 2.21E-22 | 0.687491722 | 0.255 | 0.053 | 5.01E-18 | late aNSCs |
| Lrrc8d1 | Lrrc8d | 2.30E-22 | 0.804065235 | 0.509 | 0.176 | 5.23E-18 | late aNSCs |
| Hmgxb4 | Hmgxb4 | 2.66E-22 | 0.721994232 | 0.41 | 0.119 | 6.04E-18 | late aNSCs |
| Rangap1 | Rangap1 | 2.73E-22 | 0.669207137 | 0.342 | 0.087 | 6.19E-18 | late aNSCs |
| Lrrc8b | Lrrc8b | 3.04E-22 | 0.759761841 | 0.391 | 0.112 | 6.90E-18 | late aNSCs |
| Gm44593 | Gm44593 | 4.41E-22 | 1.216929437 | 0.46 | 0.157 | 1.00E-17 | late aNSCs |
| Ubap2 | Ubap2 | 4.92E-22 | 0.722663988 | 0.453 | 0.142 | 1.12E-17 | late aNSCs |
| Dhx9 | Dhx9 | 6.27E-22 | 0.750597249 | 0.447 | 0.141 | 1.42E-17 | late aNSCs |
| 2610020C07Rik | 2610020C07Rik | 8.72E-22 | 0.759431429 | 0.466 | 0.151 | 1.98E-17 | late aNSCs |
| Ints2 | Ints2 | 8.97E-22 | 0.888069386 | 0.416 | 0.129 | 2.04E-17 | late aNSCs |
| Frmd4b1 | Frmd4b | 9.49E-22 | 0.932716346 | 0.665 | 0.299 | 2.15E-17 | late aNSCs |
| Nlk1 | Nlk | 1.04E-21 | 0.87180101 | 0.826 | 0.467 | 2.37E-17 | late aNSCs |
| Cdon1 | Cdon | 1.04E-21 | 1.035677856 | 0.503 | 0.184 | 2.37E-17 | late aNSCs |
| Nol41 | Nol4 | 1.24E-21 | 1.121069653 | 0.876 | 0.657 | 2.81E-17 | late aNSCs |
| Srrm41 | Srrm4 | 1.87E-21 | 0.696460264 | 0.516 | 0.178 | 4.24E-17 | late aNSCs |
| Rad21 | Rad21 | 2.18E-21 | 0.676399112 | 0.385 | 0.11 | 4.94E-17 | late aNSCs |
| Lcorl | Lcorl | 2.22E-21 | 0.953274696 | 0.795 | 0.456 | 5.04E-17 | late aNSCs |
| Baz1b | Baz1b | 3.02E-21 | 0.87103788 | 0.671 | 0.306 | 6.85E-17 | late aNSCs |
| Atm | Atm | 3.06E-21 | 0.784583566 | 0.373 | 0.108 | 6.95E-17 | late aNSCs |
| Taf15 | Taf15 | 5.44E-21 | 0.87876418 | 0.708 | 0.357 | 1.23E-16 | late aNSCs |
| Npat | Npat | 5.75E-21 | 0.783506255 | 0.391 | 0.118 | 1.31E-16 | late aNSCs |
| Trim36 | Trim36 | 7.68E-21 | 0.649027383 | 0.28 | 0.064 | 1.74E-16 | late aNSCs |
| Dlgap3 | Dlgap3 | 8.53E-21 | 0.724274498 | 0.311 | 0.08 | 1.94E-16 | late aNSCs |
| Nup155 | Nup155 | 2.03E-20 | 0.685741311 | 0.286 | 0.069 | 4.60E-16 | late aNSCs |
| Pde7a1 | Pde7a | 2.71E-20 | 0.783846814 | 0.571 | 0.225 | 6.15E-16 | late aNSCs |
| Ccdc18 | Ccdc18 | 2.90E-20 | 0.720836578 | 0.273 | 0.065 | 6.59E-16 | late aNSCs |
| Phf6 | Phf6 | 3.12E-20 | 0.723296422 | 0.404 | 0.125 | 7.08E-16 | late aNSCs |
| Metap1d | Metap1d | 3.47E-20 | 0.89560737 | 0.602 | 0.256 | 7.88E-16 | late aNSCs |
| Smchd1 | Smchd1 | 3.61E-20 | 0.857763006 | 0.627 | 0.283 | 8.21E-16 | late aNSCs |
| Smc6 | Smc6 | 4.13E-20 | 0.741438466 | 0.516 | 0.192 | 9.39E-16 | late aNSCs |
| Lnpk | Lnpk | 4.76E-20 | 0.751879616 | 0.447 | 0.151 | 1.08E-15 | late aNSCs |
| Taf1d | Taf1d | 5.57E-20 | 0.64198832 | 0.298 | 0.076 | 1.26E-15 | late aNSCs |
| Ehmt11 | Ehmt1 | 5.64E-20 | 0.798830821 | 0.82 | 0.456 | 1.28E-15 | late aNSCs |
| Suz12 | Suz12 | 5.77E-20 | 0.818979405 | 0.615 | 0.274 | 1.31E-15 | late aNSCs |
| 10-Sep | 10-Sep | 5.98E-20 | 0.613376602 | 0.298 | 0.076 | 1.36E-15 | late aNSCs |
| Poc1b | Poc1b | 1.26E-19 | 0.677800078 | 0.298 | 0.076 | 2.86E-15 | late aNSCs |
| Maml31 | Maml3 | 1.27E-19 | 0.525471093 | 0.758 | 0.351 | 2.87E-15 | late aNSCs |
| Dpysl31 | Dpysl3 | 1.31E-19 | 0.720800927 | 0.497 | 0.177 | 2.98E-15 | late aNSCs |
| Smarcad11 | Smarcad1 | 1.54E-19 | 0.756696418 | 0.621 | 0.262 | 3.51E-15 | late aNSCs |
| Sfpq1 | Sfpq | 2.04E-19 | 0.75398697 | 0.832 | 0.507 | 4.63E-15 | late aNSCs |
| G3bp1 | G3bp1 | 2.17E-19 | 0.704974946 | 0.453 | 0.156 | 4.93E-15 | late aNSCs |
| Slc38a2 | Slc38a2 | 2.33E-19 | 0.698573348 | 0.385 | 0.12 | 5.30E-15 | late aNSCs |
| Eml41 | Eml4 | 3.53E-19 | 0.806704755 | 0.565 | 0.23 | 8.01E-15 | late aNSCs |
| Spata13 | Spata13 | 3.71E-19 | 0.746057223 | 0.298 | 0.08 | 8.42E-15 | late aNSCs |
| Nup160 | Nup160 | 4.14E-19 | 0.733019252 | 0.36 | 0.107 | 9.41E-15 | late aNSCs |
| Ilf21 | Ilf2 | 8.38E-19 | 0.649351325 | 0.478 | 0.168 | 1.90E-14 | late aNSCs |
| Dapk11 | Dapk1 | 1.06E-18 | 0.918533607 | 0.646 | 0.31 | 2.40E-14 | late aNSCs |
| Bcl7a | Bcl7a | 1.06E-18 | 0.75761289 | 0.441 | 0.156 | 2.41E-14 | late aNSCs |
| Slc4a71 | Slc4a7 | 1.18E-18 | 0.727488275 | 0.46 | 0.161 | 2.67E-14 | late aNSCs |
| Tcerg1 | Tcerg1 | 1.31E-18 | 0.700174418 | 0.503 | 0.193 | 2.98E-14 | late aNSCs |
| Hmgb1 | Hmgb1 | 1.80E-18 | 0.705569199 | 0.491 | 0.183 | 4.08E-14 | late aNSCs |
| Stmn11 | Stmn1 | 2.17E-18 | 0.804665946 | 0.528 | 0.209 | 4.93E-14 | late aNSCs |
| St6galnac31 | St6galnac3 | 2.25E-18 | 0.542599583 | 0.565 | 0.215 | 5.12E-14 | late aNSCs |
| Arhgef71 | Arhgef7 | 2.34E-18 | 0.790474731 | 0.491 | 0.188 | 5.31E-14 | late aNSCs |
| Ttll4 | Ttll4 | 2.89E-18 | 0.564599909 | 0.298 | 0.08 | 6.57E-14 | late aNSCs |
| Sipa1l11 | Sipa1l1 | 2.93E-18 | 0.80668709 | 0.677 | 0.33 | 6.66E-14 | late aNSCs |
| Slc38a12 | Slc38a1 | 3.22E-18 | 0.586307002 | 0.571 | 0.229 | 7.31E-14 | late aNSCs |
| Rab8b1 | Rab8b | 3.33E-18 | 0.759537348 | 0.41 | 0.141 | 7.56E-14 | late aNSCs |
| Arid21 | Arid2 | 4.58E-18 | 0.804124155 | 0.72 | 0.389 | 1.04E-13 | late aNSCs |
| Ctnna21 | Ctnna2 | 4.68E-18 | 0.735906378 | 0.981 | 0.898 | 1.06E-13 | late aNSCs |
| Pds5b | Pds5b | 5.03E-18 | 0.793743273 | 0.714 | 0.36 | 1.14E-13 | late aNSCs |
| Nup205 | Nup205 | 5.32E-18 | 0.560863344 | 0.317 | 0.087 | 1.21E-13 | late aNSCs |
| Cep57 | Cep57 | 5.52E-18 | 0.649718865 | 0.286 | 0.076 | 1.25E-13 | late aNSCs |
| Srbd1 | Srbd1 | 5.82E-18 | 0.641026087 | 0.366 | 0.114 | 1.32E-13 | late aNSCs |
| Stk33 | Stk33 | 5.85E-18 | 0.819587889 | 0.267 | 0.069 | 1.33E-13 | late aNSCs |
| Hnrnpul1 | Hnrnpul1 | 7.60E-18 | 0.668687891 | 0.404 | 0.134 | 1.73E-13 | late aNSCs |
| Mapkapk2 | Mapkapk2 | 8.33E-18 | 0.64784881 | 0.311 | 0.087 | 1.89E-13 | late aNSCs |
| Slit21 | Slit2 | 1.11E-17 | 0.93568238 | 0.547 | 0.237 | 2.53E-13 | late aNSCs |
| Ctdspl2 | Ctdspl2 | 1.35E-17 | 0.776300212 | 0.528 | 0.222 | 3.06E-13 | late aNSCs |
| Cbx1 | Cbx1 | 1.49E-17 | 0.675449207 | 0.453 | 0.164 | 3.39E-13 | late aNSCs |
| Spata5 | Spata5 | 1.50E-17 | 0.708540981 | 0.441 | 0.157 | 3.41E-13 | late aNSCs |
| Tcf121 | Tcf12 | 1.92E-17 | 0.676385014 | 0.944 | 0.723 | 4.36E-13 | late aNSCs |
| Pum11 | Pum1 | 2.18E-17 | 0.7571647 | 0.77 | 0.426 | 4.95E-13 | late aNSCs |
| Stag1 | Stag1 | 2.62E-17 | 0.7703746 | 0.901 | 0.703 | 5.95E-13 | late aNSCs |
| Cacnb21 | Cacnb2 | 2.68E-17 | 0.879449658 | 0.727 | 0.433 | 6.09E-13 | late aNSCs |
| Nrxn31 | Nrxn3 | 3.02E-17 | 0.990614556 | 0.994 | 0.92 | 6.86E-13 | late aNSCs |
| Ctcf | Ctcf | 3.14E-17 | 0.651261053 | 0.522 | 0.21 | 7.14E-13 | late aNSCs |
| BC052040 | BC052040 | 3.50E-17 | 0.775160708 | 0.497 | 0.2 | 7.96E-13 | late aNSCs |
| Neto21 | Neto2 | 3.91E-17 | 0.778826245 | 0.484 | 0.199 | 8.87E-13 | late aNSCs |
| Chd31 | Chd3 | 4.21E-17 | 0.755176963 | 0.441 | 0.161 | 9.56E-13 | late aNSCs |
| Pum21 | Pum2 | 4.36E-17 | 0.77186317 | 0.677 | 0.348 | 9.90E-13 | late aNSCs |
| Pds5a | Pds5a | 5.39E-17 | 0.866567945 | 0.702 | 0.368 | 1.22E-12 | late aNSCs |
| Smarcc11 | Smarcc1 | 5.49E-17 | 0.861284239 | 0.677 | 0.34 | 1.25E-12 | late aNSCs |
| Rbbp4 | Rbbp4 | 5.87E-17 | 0.767701336 | 0.46 | 0.175 | 1.33E-12 | late aNSCs |
| Kitl | Kitl | 6.64E-17 | 0.576573462 | 0.261 | 0.067 | 1.51E-12 | late aNSCs |
| Prox1 | Prox1 | 6.96E-17 | 0.656210192 | 0.292 | 0.083 | 1.58E-12 | late aNSCs |
| Hn11 | Hn1 | 1.08E-16 | 0.657302114 | 0.366 | 0.119 | 2.46E-12 | late aNSCs |
| Qser11 | Qser1 | 1.09E-16 | 0.646317701 | 0.478 | 0.187 | 2.47E-12 | late aNSCs |
| Tia11 | Tia1 | 1.11E-16 | 0.76361315 | 0.646 | 0.327 | 2.51E-12 | late aNSCs |
| Cdc42se21 | Cdc42se2 | 1.26E-16 | 0.750676597 | 0.559 | 0.243 | 2.85E-12 | late aNSCs |
| Rtn31 | Rtn3 | 1.47E-16 | 0.722823083 | 0.888 | 0.696 | 3.35E-12 | late aNSCs |
| Ipo9 | Ipo9 | 1.67E-16 | 0.662145787 | 0.435 | 0.157 | 3.79E-12 | late aNSCs |
| Ep400 | Ep400 | 2.07E-16 | 0.70207682 | 0.615 | 0.28 | 4.71E-12 | late aNSCs |
| Lrrfip1 | Lrrfip1 | 2.23E-16 | 0.701211173 | 0.298 | 0.09 | 5.06E-12 | late aNSCs |
| Tmem21 | Tmem2 | 2.34E-16 | 0.842963446 | 0.435 | 0.166 | 5.32E-12 | late aNSCs |
| Lzts1 | Lzts1 | 2.46E-16 | 0.769827073 | 0.28 | 0.081 | 5.60E-12 | late aNSCs |
| Anp32b | Anp32b | 2.60E-16 | 0.499322612 | 0.267 | 0.071 | 5.91E-12 | late aNSCs |
| Khdrbs11 | Khdrbs1 | 2.98E-16 | 0.699189606 | 0.677 | 0.331 | 6.76E-12 | late aNSCs |
| Mir9-3hg | Mir9-3hg | 3.62E-16 | 0.844590904 | 0.826 | 0.572 | 8.22E-12 | late aNSCs |
| Srsf10 | Srsf10 | 3.79E-16 | 0.678805079 | 0.491 | 0.201 | 8.60E-12 | late aNSCs |
| Igf1r1 | Igf1r | 4.05E-16 | 0.642230381 | 0.938 | 0.657 | 9.21E-12 | late aNSCs |
| Ranbp91 | Ranbp9 | 4.15E-16 | 0.768001389 | 0.671 | 0.331 | 9.42E-12 | late aNSCs |
| Anp32e | Anp32e | 4.32E-16 | 0.638393662 | 0.292 | 0.086 | 9.81E-12 | late aNSCs |
| Gm269361 | Gm26936 | 4.36E-16 | 0.66769979 | 0.478 | 0.185 | 9.90E-12 | late aNSCs |
| Grk5 | Grk5 | 4.73E-16 | 0.580442822 | 0.329 | 0.104 | 1.07E-11 | late aNSCs |
| Elavl31 | Elavl3 | 5.47E-16 | 0.646499187 | 0.547 | 0.231 | 1.24E-11 | late aNSCs |
| Terf1 | Terf1 | 6.37E-16 | 0.701993963 | 0.366 | 0.127 | 1.45E-11 | late aNSCs |
| D10Wsu102e | D10Wsu102e | 6.94E-16 | 0.769464401 | 0.379 | 0.136 | 1.58E-11 | late aNSCs |
| Ipo11 | Ipo11 | 6.95E-16 | 0.651450199 | 0.478 | 0.19 | 1.58E-11 | late aNSCs |
| Nvl | Nvl | 7.36E-16 | 0.636157681 | 0.435 | 0.162 | 1.67E-11 | late aNSCs |
| Ncoa51 | Ncoa5 | 7.42E-16 | 0.687688602 | 0.522 | 0.221 | 1.68E-11 | late aNSCs |
| H2afy2 | H2afy2 | 8.63E-16 | 0.476263088 | 0.273 | 0.075 | 1.96E-11 | late aNSCs |
| Zmiz11 | Zmiz1 | 8.90E-16 | 0.718450692 | 0.807 | 0.484 | 2.02E-11 | late aNSCs |
| Kpna3 | Kpna3 | 1.09E-15 | 0.70244643 | 0.584 | 0.263 | 2.47E-11 | late aNSCs |
| Smarca41 | Smarca4 | 1.11E-15 | 0.633851124 | 0.54 | 0.228 | 2.52E-11 | late aNSCs |
| Lrp81 | Lrp8 | 1.40E-15 | 0.619420586 | 0.528 | 0.212 | 3.18E-11 | late aNSCs |
| Arid1b1 | Arid1b | 1.60E-15 | 0.61317514 | 0.913 | 0.63 | 3.64E-11 | late aNSCs |
| Tsg101 | Tsg101 | 1.85E-15 | 0.641573566 | 0.422 | 0.157 | 4.21E-11 | late aNSCs |
| Sh3rf11 | Sh3rf1 | 2.02E-15 | 0.787711331 | 0.59 | 0.275 | 4.59E-11 | late aNSCs |
| Akt31 | Akt3 | 2.24E-15 | 0.720788714 | 0.919 | 0.78 | 5.09E-11 | late aNSCs |
| Cux1 | Cux1 | 2.47E-15 | 0.815906804 | 0.783 | 0.487 | 5.61E-11 | late aNSCs |
| Sp3 | Sp3 | 2.69E-15 | 0.698146988 | 0.509 | 0.218 | 6.12E-11 | late aNSCs |
| Hnrnpr1 | Hnrnpr | 2.77E-15 | 0.792939241 | 0.727 | 0.428 | 6.29E-11 | late aNSCs |
| Setd5 | Setd5 | 3.52E-15 | 0.680355028 | 0.807 | 0.514 | 8.00E-11 | late aNSCs |
| Vps37b | Vps37b | 3.60E-15 | 0.631898826 | 0.311 | 0.099 | 8.17E-11 | late aNSCs |
| Heg1 | Heg1 | 3.82E-15 | 0.652413175 | 0.317 | 0.102 | 8.68E-11 | late aNSCs |
| Exoc4 | Exoc4 | 4.00E-15 | 0.680818983 | 0.863 | 0.691 | 9.08E-11 | late aNSCs |
| Asxl11 | Asxl1 | 4.40E-15 | 0.736813373 | 0.627 | 0.3 | 9.98E-11 | late aNSCs |
| Caprin11 | Caprin1 | 4.52E-15 | 0.710639863 | 0.627 | 0.312 | 1.03E-10 | late aNSCs |
| Cep250 | Cep250 | 4.87E-15 | 0.532636514 | 0.348 | 0.116 | 1.11E-10 | late aNSCs |
| Vkorc1l1 | Vkorc1l1 | 5.18E-15 | 0.570489733 | 0.466 | 0.185 | 1.18E-10 | late aNSCs |
| Gtdc11 | Gtdc1 | 6.06E-15 | 0.759157961 | 0.609 | 0.295 | 1.38E-10 | late aNSCs |
| Slc24a5 | Slc24a5 | 6.64E-15 | 0.539481998 | 0.292 | 0.088 | 1.51E-10 | late aNSCs |
| Tcf3 | Tcf3 | 7.58E-15 | 0.612993758 | 0.304 | 0.097 | 1.72E-10 | late aNSCs |
| Naa40 | Naa40 | 7.62E-15 | 0.500991397 | 0.404 | 0.143 | 1.73E-10 | late aNSCs |
| Epha41 | Epha4 | 8.35E-15 | 0.663318332 | 0.696 | 0.357 | 1.90E-10 | late aNSCs |
| Ccdc34 | Ccdc34 | 8.50E-15 | 0.527280066 | 0.36 | 0.124 | 1.93E-10 | late aNSCs |
| Zeb1 | Zeb1 | 8.62E-15 | 0.795420262 | 0.938 | 0.851 | 1.96E-10 | late aNSCs |
| Vav2 | Vav2 | 8.76E-15 | 0.504389227 | 0.28 | 0.082 | 1.99E-10 | late aNSCs |
| Plxna21 | Plxna2 | 8.97E-15 | 0.658256162 | 0.596 | 0.279 | 2.04E-10 | late aNSCs |
| Nedd4l1 | Nedd4l | 9.41E-15 | 0.80172834 | 0.876 | 0.684 | 2.14E-10 | late aNSCs |
| Cramp1l | Cramp1l | 1.02E-14 | 0.612162258 | 0.46 | 0.181 | 2.31E-10 | late aNSCs |
| Zfp451 | Zfp451 | 1.16E-14 | 0.603467625 | 0.447 | 0.18 | 2.64E-10 | late aNSCs |
| Xrcc5 | Xrcc5 | 1.32E-14 | 0.644946348 | 0.36 | 0.13 | 2.99E-10 | late aNSCs |
| Unk | Unk | 1.34E-14 | 0.541666003 | 0.348 | 0.119 | 3.05E-10 | late aNSCs |
| Cebpg | Cebpg | 1.46E-14 | 0.577676188 | 0.261 | 0.077 | 3.31E-10 | late aNSCs |
| Mpp7 | Mpp7 | 1.51E-14 | 0.599831093 | 0.398 | 0.148 | 3.42E-10 | late aNSCs |
| Dlx6os11 | Dlx6os1 | 1.64E-14 | 0.851317927 | 0.547 | 0.252 | 3.73E-10 | late aNSCs |
| Rgs3 | Rgs3 | 2.04E-14 | 0.516282424 | 0.329 | 0.108 | 4.62E-10 | late aNSCs |
| Kcnk102 | Kcnk10 | 2.18E-14 | 0.696248694 | 0.522 | 0.232 | 4.95E-10 | late aNSCs |
| Slf2 | Slf2 | 2.40E-14 | 0.699630427 | 0.497 | 0.221 | 5.44E-10 | late aNSCs |
| Rybp | Rybp | 2.63E-14 | 0.550782945 | 0.335 | 0.115 | 5.98E-10 | late aNSCs |
| Orc6 | Orc6 | 3.10E-14 | 0.505955824 | 0.255 | 0.074 | 7.03E-10 | late aNSCs |
| Hnrnpd | Hnrnpd | 3.36E-14 | 0.582571457 | 0.553 | 0.243 | 7.62E-10 | late aNSCs |
| Rims21 | Rims2 | 3.94E-14 | 0.71276011 | 0.876 | 0.663 | 8.94E-10 | late aNSCs |
| Srrm31 | Srrm3 | 4.49E-14 | 0.537142267 | 0.286 | 0.089 | 1.02E-09 | late aNSCs |
| Yes11 | Yes1 | 5.18E-14 | 0.607745221 | 0.466 | 0.197 | 1.18E-09 | late aNSCs |
| Gtf2f2 | Gtf2f2 | 5.73E-14 | 0.530746129 | 0.329 | 0.111 | 1.30E-09 | late aNSCs |
| Ilf3 | Ilf3 | 5.92E-14 | 0.692624835 | 0.422 | 0.172 | 1.34E-09 | late aNSCs |
| Zcchc111 | Zcchc11 | 6.17E-14 | 0.624852363 | 0.77 | 0.475 | 1.40E-09 | late aNSCs |
| Pacs11 | Pacs1 | 6.28E-14 | 0.727531372 | 0.553 | 0.266 | 1.43E-09 | late aNSCs |
| Nhs | Nhs | 6.56E-14 | 0.753301155 | 0.28 | 0.09 | 1.49E-09 | late aNSCs |
| Gab21 | Gab2 | 6.90E-14 | 1.017819439 | 0.491 | 0.241 | 1.57E-09 | late aNSCs |
| Gm48742 | Gm48742 | 8.22E-14 | 0.884953634 | 0.571 | 0.318 | 1.87E-09 | late aNSCs |
| Ccm2 | Ccm2 | 8.61E-14 | 0.574115469 | 0.36 | 0.13 | 1.96E-09 | late aNSCs |
| Cbfb | Cbfb | 8.67E-14 | 0.561415894 | 0.422 | 0.166 | 1.97E-09 | late aNSCs |
| Rsrc1 | Rsrc1 | 8.75E-14 | 0.712713738 | 0.609 | 0.315 | 1.99E-09 | late aNSCs |
| Dcaf1 | Dcaf1 | 9.20E-14 | 0.57298954 | 0.429 | 0.172 | 2.09E-09 | late aNSCs |
| Cpsf61 | Cpsf6 | 9.32E-14 | 0.789660882 | 0.621 | 0.353 | 2.12E-09 | late aNSCs |
| AC162302.11 | AC162302.1 | 1.08E-13 | 0.654369531 | 0.422 | 0.173 | 2.46E-09 | late aNSCs |
| Dyrk1a | Dyrk1a | 1.43E-13 | 0.639526163 | 0.745 | 0.452 | 3.24E-09 | late aNSCs |
| Zfp2921 | Zfp292 | 1.51E-13 | 0.663551138 | 0.72 | 0.39 | 3.43E-09 | late aNSCs |
| Tnpo11 | Tnpo1 | 1.69E-13 | 0.644643912 | 0.671 | 0.363 | 3.85E-09 | late aNSCs |
| Pigu | Pigu | 1.74E-13 | 0.561006603 | 0.36 | 0.132 | 3.96E-09 | late aNSCs |
| Slc43a2 | Slc43a2 | 2.01E-13 | 0.595220118 | 0.317 | 0.111 | 4.57E-09 | late aNSCs |
| Copg2 | Copg2 | 2.05E-13 | 0.620848092 | 0.503 | 0.219 | 4.65E-09 | late aNSCs |
| Mad1l1 | Mad1l1 | 2.12E-13 | 0.446204712 | 0.348 | 0.123 | 4.82E-09 | late aNSCs |
| Cep97 | Cep97 | 2.26E-13 | 0.517814916 | 0.329 | 0.114 | 5.13E-09 | late aNSCs |
| Msantd2 | Msantd2 | 2.37E-13 | 0.610377494 | 0.484 | 0.219 | 5.37E-09 | late aNSCs |
| Megf91 | Megf9 | 2.43E-13 | 0.567657215 | 0.571 | 0.27 | 5.53E-09 | late aNSCs |
| Pkp4 | Pkp4 | 2.46E-13 | 0.712948115 | 0.441 | 0.189 | 5.58E-09 | late aNSCs |
| Orc2 | Orc2 | 2.59E-13 | 0.686272744 | 0.323 | 0.119 | 5.88E-09 | late aNSCs |
| Fubp11 | Fubp1 | 2.59E-13 | 0.658384933 | 0.708 | 0.416 | 5.88E-09 | late aNSCs |
| Ube2i | Ube2i | 3.06E-13 | 0.531099377 | 0.354 | 0.131 | 6.94E-09 | late aNSCs |
| Slc8a11 | Slc8a1 | 3.29E-13 | 0.909438897 | 0.528 | 0.258 | 7.48E-09 | late aNSCs |
| Mcm9 | Mcm9 | 3.53E-13 | 0.49367964 | 0.273 | 0.088 | 8.01E-09 | late aNSCs |
| Platr25 | Platr25 | 4.71E-13 | 0.610349503 | 0.354 | 0.134 | 1.07E-08 | late aNSCs |
| Tet31 | Tet3 | 4.84E-13 | 0.604438607 | 0.609 | 0.309 | 1.10E-08 | late aNSCs |
| Mtf21 | Mtf2 | 5.01E-13 | 0.575305933 | 0.565 | 0.261 | 1.14E-08 | late aNSCs |
| B230219D22Rik | B230219D22Rik | 5.48E-13 | 0.621927939 | 0.342 | 0.127 | 1.24E-08 | late aNSCs |
| Ttc281 | Ttc28 | 5.50E-13 | 0.670592764 | 0.807 | 0.57 | 1.25E-08 | late aNSCs |
| Cdkal1 | Cdkal1 | 5.69E-13 | 0.751129783 | 0.696 | 0.441 | 1.29E-08 | late aNSCs |
| Uri1 | Uri1 | 5.83E-13 | 0.579663977 | 0.472 | 0.202 | 1.33E-08 | late aNSCs |
| Ssbp32 | Ssbp3 | 5.94E-13 | 0.673257276 | 0.534 | 0.259 | 1.35E-08 | late aNSCs |
| Fancc | Fancc | 6.36E-13 | 0.431954541 | 0.317 | 0.109 | 1.44E-08 | late aNSCs |
| Sp1 | Sp1 | 7.14E-13 | 0.467786468 | 0.304 | 0.103 | 1.62E-08 | late aNSCs |
| Ptbp21 | Ptbp2 | 7.22E-13 | 0.632219765 | 0.733 | 0.443 | 1.64E-08 | late aNSCs |
| Ankrd10 | Ankrd10 | 7.43E-13 | 0.583454879 | 0.41 | 0.169 | 1.69E-08 | late aNSCs |
| Zranb3 | Zranb3 | 9.10E-13 | 0.627757145 | 0.28 | 0.094 | 2.07E-08 | late aNSCs |
| Dock111 | Dock11 | 1.05E-12 | 0.713068618 | 0.534 | 0.257 | 2.39E-08 | late aNSCs |
| Mcmbp1 | Mcmbp | 1.08E-12 | 0.536163599 | 0.447 | 0.189 | 2.45E-08 | late aNSCs |
| Dpp61 | Dpp6 | 1.11E-12 | 0.57419217 | 0.584 | 0.303 | 2.52E-08 | late aNSCs |
| Trim24 | Trim24 | 1.27E-12 | 0.597074383 | 0.429 | 0.183 | 2.87E-08 | late aNSCs |
| Sel1l3 | Sel1l3 | 1.27E-12 | 0.50073299 | 0.28 | 0.092 | 2.88E-08 | late aNSCs |
| Rap1a | Rap1a | 1.29E-12 | 0.669808774 | 0.435 | 0.186 | 2.94E-08 | late aNSCs |
| Iars | Iars | 1.34E-12 | 0.517823508 | 0.28 | 0.093 | 3.03E-08 | late aNSCs |
| Rbpj | Rbpj | 1.75E-12 | 0.566409315 | 0.398 | 0.162 | 3.98E-08 | late aNSCs |
| Elf2 | Elf2 | 1.88E-12 | 0.63252982 | 0.503 | 0.237 | 4.27E-08 | late aNSCs |
| Sec631 | Sec63 | 1.90E-12 | 0.636983138 | 0.609 | 0.319 | 4.32E-08 | late aNSCs |
| Scaf8 | Scaf8 | 1.95E-12 | 0.62713761 | 0.658 | 0.376 | 4.43E-08 | late aNSCs |
| Kif21a1 | Kif21a | 2.03E-12 | 0.612837429 | 0.764 | 0.506 | 4.60E-08 | late aNSCs |
| Filip1l | Filip1l | 2.35E-12 | 0.510277185 | 0.255 | 0.081 | 5.33E-08 | late aNSCs |
| Zfp131 | Zfp131 | 2.47E-12 | 0.546300266 | 0.36 | 0.141 | 5.62E-08 | late aNSCs |
| Memo11 | Memo1 | 2.74E-12 | 0.526926346 | 0.602 | 0.304 | 6.23E-08 | late aNSCs |
| Nck2 | Nck2 | 2.75E-12 | 0.427007581 | 0.273 | 0.09 | 6.24E-08 | late aNSCs |
| Yeats2 | Yeats2 | 2.81E-12 | 0.560491817 | 0.547 | 0.258 | 6.39E-08 | late aNSCs |
| Gmeb1 | Gmeb1 | 2.82E-12 | 0.558951875 | 0.342 | 0.132 | 6.41E-08 | late aNSCs |
| Cstf3 | Cstf3 | 2.94E-12 | 0.6951036 | 0.658 | 0.362 | 6.67E-08 | late aNSCs |
| Nsd3 | Nsd3 | 3.38E-12 | 0.586705253 | 0.72 | 0.45 | 7.68E-08 | late aNSCs |
| Mtss11 | Mtss1 | 3.62E-12 | 0.626610496 | 0.509 | 0.236 | 8.22E-08 | late aNSCs |
| Ralgapa21 | Ralgapa2 | 3.72E-12 | 0.548174701 | 0.602 | 0.296 | 8.44E-08 | late aNSCs |
| Cse1l | Cse1l | 3.80E-12 | 0.53633188 | 0.311 | 0.112 | 8.63E-08 | late aNSCs |
| Bzw2 | Bzw2 | 4.01E-12 | 0.474332937 | 0.36 | 0.138 | 9.11E-08 | late aNSCs |
| Eya4 | Eya4 | 4.24E-12 | 0.572331078 | 0.292 | 0.104 | 9.64E-08 | late aNSCs |
| Bcor1 | Bcor | 4.68E-12 | 0.597483824 | 0.348 | 0.135 | 1.06E-07 | late aNSCs |
| Nav11 | Nav1 | 4.73E-12 | 0.526315116 | 0.578 | 0.284 | 1.07E-07 | late aNSCs |
| Nap1l1 | Nap1l1 | 4.92E-12 | 0.537490688 | 0.342 | 0.133 | 1.12E-07 | late aNSCs |
| Odf2l | Odf2l | 5.74E-12 | 0.440861461 | 0.255 | 0.081 | 1.30E-07 | late aNSCs |
| Tra2b | Tra2b | 6.10E-12 | 0.559409789 | 0.59 | 0.301 | 1.38E-07 | late aNSCs |
| Srsf31 | Srsf3 | 6.21E-12 | 0.581493173 | 0.516 | 0.251 | 1.41E-07 | late aNSCs |
| Ahctf1 | Ahctf1 | 6.80E-12 | 0.601395691 | 0.385 | 0.162 | 1.55E-07 | late aNSCs |
| Ccar11 | Ccar1 | 6.86E-12 | 0.603295743 | 0.646 | 0.347 | 1.56E-07 | late aNSCs |
| Fsd1l | Fsd1l | 7.04E-12 | 0.427862116 | 0.366 | 0.138 | 1.60E-07 | late aNSCs |
| Btaf1 | Btaf1 | 7.83E-12 | 0.553880395 | 0.516 | 0.251 | 1.78E-07 | late aNSCs |
| Srsf7 | Srsf7 | 8.08E-12 | 0.67672892 | 0.696 | 0.423 | 1.84E-07 | late aNSCs |
| Lims1 | Lims1 | 8.64E-12 | 0.742479076 | 0.627 | 0.367 | 1.96E-07 | late aNSCs |
| Fnbp1l1 | Fnbp1l | 9.37E-12 | 0.651591524 | 0.59 | 0.302 | 2.13E-07 | late aNSCs |
| Bahcc1 | Bahcc1 | 9.73E-12 | 0.46199341 | 0.273 | 0.094 | 2.21E-07 | late aNSCs |
| Slc10a71 | Slc10a7 | 1.02E-11 | 0.514005245 | 0.478 | 0.214 | 2.32E-07 | late aNSCs |
| Ext1 | Ext1 | 1.03E-11 | 0.596669017 | 0.851 | 0.611 | 2.33E-07 | late aNSCs |
| Hnrnpu | Hnrnpu | 1.03E-11 | 0.593788246 | 0.708 | 0.462 | 2.34E-07 | late aNSCs |
| Cenpc1 | Cenpc1 | 1.03E-11 | 0.662644589 | 0.466 | 0.222 | 2.34E-07 | late aNSCs |
| Dhx15 | Dhx15 | 1.06E-11 | 0.49265467 | 0.472 | 0.212 | 2.41E-07 | late aNSCs |
| Myh101 | Myh10 | 1.07E-11 | 0.474309086 | 0.466 | 0.205 | 2.43E-07 | late aNSCs |
| Ewsr1 | Ewsr1 | 1.13E-11 | 0.583929621 | 0.615 | 0.34 | 2.57E-07 | late aNSCs |
| Yars | Yars | 1.25E-11 | 0.444687866 | 0.329 | 0.123 | 2.83E-07 | late aNSCs |
| Trim331 | Trim33 | 1.25E-11 | 0.61045373 | 0.578 | 0.311 | 2.85E-07 | late aNSCs |
| Prrc2b1 | Prrc2b | 1.26E-11 | 0.529324806 | 0.652 | 0.342 | 2.87E-07 | late aNSCs |
| Huwe1 | Huwe1 | 1.30E-11 | 0.58047135 | 0.783 | 0.504 | 2.95E-07 | late aNSCs |
| Kdm2b1 | Kdm2b | 1.32E-11 | 0.596346251 | 0.385 | 0.16 | 3.00E-07 | late aNSCs |
| Ppp4r3a | Ppp4r3a | 1.32E-11 | 0.549656525 | 0.46 | 0.209 | 3.01E-07 | late aNSCs |
| Nhlrc2 | Nhlrc2 | 1.37E-11 | 0.585911735 | 0.391 | 0.169 | 3.10E-07 | late aNSCs |
| Brd3 | Brd3 | 1.41E-11 | 0.511011469 | 0.348 | 0.137 | 3.20E-07 | late aNSCs |
| Kansl11 | Kansl1 | 1.46E-11 | 0.538187079 | 0.944 | 0.734 | 3.32E-07 | late aNSCs |
| Zfp1571 | Zfp157 | 1.60E-11 | 0.438029149 | 0.366 | 0.146 | 3.64E-07 | late aNSCs |
| Ss18 | Ss18 | 1.66E-11 | 0.47905018 | 0.335 | 0.13 | 3.77E-07 | late aNSCs |
| Smc5 | Smc5 | 1.68E-11 | 0.556281854 | 0.547 | 0.267 | 3.83E-07 | late aNSCs |
| Gm37240 | Gm37240 | 1.91E-11 | 0.623256961 | 0.522 | 0.257 | 4.34E-07 | late aNSCs |
| Slc35f12 | Slc35f1 | 2.10E-11 | 0.751597111 | 0.652 | 0.41 | 4.76E-07 | late aNSCs |
| Gabpb2 | Gabpb2 | 2.22E-11 | 0.503630919 | 0.317 | 0.119 | 5.05E-07 | late aNSCs |
| Mast21 | Mast2 | 2.24E-11 | 0.513870886 | 0.602 | 0.311 | 5.09E-07 | late aNSCs |
| Zfp4621 | Zfp462 | 2.45E-11 | 0.630927408 | 0.689 | 0.41 | 5.55E-07 | late aNSCs |
| Gnb11 | Gnb1 | 2.49E-11 | 0.62669579 | 0.727 | 0.467 | 5.66E-07 | late aNSCs |
| Auts21 | Auts2 | 2.51E-11 | 0.332390033 | 1 | 0.986 | 5.70E-07 | late aNSCs |
| Zfp280d1 | Zfp280d | 2.51E-11 | 0.599854359 | 0.658 | 0.387 | 5.71E-07 | late aNSCs |
| Gm20388 | Gm20388 | 2.52E-11 | 0.592831691 | 0.95 | 0.803 | 5.72E-07 | late aNSCs |
| Rnf157 | Rnf157 | 2.55E-11 | 0.581755577 | 0.466 | 0.216 | 5.78E-07 | late aNSCs |
| Stx6 | Stx6 | 2.79E-11 | 0.582273676 | 0.379 | 0.159 | 6.33E-07 | late aNSCs |
| Ube2d2a | Ube2d2a | 2.86E-11 | 0.525645929 | 0.571 | 0.287 | 6.50E-07 | late aNSCs |
| Cop1 | Cop1 | 2.91E-11 | 0.609663371 | 0.571 | 0.302 | 6.60E-07 | late aNSCs |
| Dennd5b1 | Dennd5b | 3.12E-11 | 0.642040027 | 0.596 | 0.328 | 7.08E-07 | late aNSCs |
| Srgap21 | Srgap2 | 3.61E-11 | 0.518486344 | 0.801 | 0.533 | 8.21E-07 | late aNSCs |
| Ybx1 | Ybx1 | 3.87E-11 | 0.503898158 | 0.373 | 0.155 | 8.80E-07 | late aNSCs |
| Pde6d | Pde6d | 4.15E-11 | 0.492875465 | 0.273 | 0.096 | 9.43E-07 | late aNSCs |
| Wdr70 | Wdr70 | 4.16E-11 | 0.484752768 | 0.435 | 0.196 | 9.46E-07 | late aNSCs |
| Csmd21 | Csmd2 | 4.26E-11 | 0.838649262 | 0.385 | 0.177 | 9.68E-07 | late aNSCs |
| Pou3f2 | Pou3f2 | 4.47E-11 | 0.545481048 | 0.422 | 0.188 | 1.01E-06 | late aNSCs |
| Bclaf3 | Bclaf3 | 4.70E-11 | 0.467281024 | 0.335 | 0.131 | 1.07E-06 | late aNSCs |
| Sox41 | Sox4 | 4.90E-11 | 0.537005128 | 0.348 | 0.14 | 1.11E-06 | late aNSCs |
| Arrdc3 | Arrdc3 | 5.12E-11 | 0.524009126 | 0.261 | 0.092 | 1.16E-06 | late aNSCs |
| Xpo71 | Xpo7 | 5.35E-11 | 0.505136611 | 0.652 | 0.343 | 1.21E-06 | late aNSCs |
| Zfp2071 | Zfp207 | 5.47E-11 | 0.552461039 | 0.54 | 0.271 | 1.24E-06 | late aNSCs |
| Amph | Amph | 5.76E-11 | 0.582015913 | 0.385 | 0.165 | 1.31E-06 | late aNSCs |
| Grin3a1 | Grin3a | 5.95E-11 | 0.540538428 | 0.323 | 0.125 | 1.35E-06 | late aNSCs |
| Dach1 | Dach1 | 5.99E-11 | 1.132176549 | 0.59 | 0.373 | 1.36E-06 | late aNSCs |
| Zmym4 | Zmym4 | 6.08E-11 | 0.554705118 | 0.776 | 0.48 | 1.38E-06 | late aNSCs |
| Kif2a1 | Kif2a | 6.20E-11 | 0.477756998 | 0.484 | 0.225 | 1.41E-06 | late aNSCs |
| Traf3ip2 | Traf3ip2 | 6.51E-11 | 0.549806515 | 0.28 | 0.104 | 1.48E-06 | late aNSCs |
| Elp3 | Elp3 | 6.83E-11 | 0.463711539 | 0.273 | 0.097 | 1.55E-06 | late aNSCs |
| Pot1a | Pot1a | 8.23E-11 | 0.445420004 | 0.28 | 0.101 | 1.87E-06 | late aNSCs |
| Kat6b1 | Kat6b | 8.24E-11 | 0.632532293 | 0.807 | 0.577 | 1.87E-06 | late aNSCs |
| Klhdc101 | Klhdc10 | 8.24E-11 | 0.60038683 | 0.609 | 0.332 | 1.87E-06 | late aNSCs |
| Chd61 | Chd6 | 8.61E-11 | 0.482042863 | 0.776 | 0.509 | 1.96E-06 | late aNSCs |
| Eif4ebp2 | Eif4ebp2 | 8.83E-11 | 0.4592487 | 0.273 | 0.099 | 2.00E-06 | late aNSCs |
| Nap1l4 | Nap1l4 | 8.96E-11 | 0.487753858 | 0.348 | 0.141 | 2.04E-06 | late aNSCs |
| Klhl71 | Klhl7 | 8.99E-11 | 0.603391771 | 0.584 | 0.325 | 2.04E-06 | late aNSCs |
| Dock71 | Dock7 | 9.03E-11 | 0.515486569 | 0.683 | 0.403 | 2.05E-06 | late aNSCs |
| E130307A14Rik1 | E130307A14Rik | 9.08E-11 | 0.603019604 | 0.64 | 0.379 | 2.06E-06 | late aNSCs |
| Fus1 | Fus | 9.17E-11 | 0.57656275 | 0.758 | 0.487 | 2.08E-06 | late aNSCs |
| Actn4 | Actn4 | 9.47E-11 | 0.472774803 | 0.366 | 0.156 | 2.15E-06 | late aNSCs |
| Dbn11 | Dbn1 | 9.54E-11 | 0.527606025 | 0.335 | 0.136 | 2.17E-06 | late aNSCs |
| Fem1c | Fem1c | 9.62E-11 | 0.416917114 | 0.261 | 0.091 | 2.19E-06 | late aNSCs |
| Cdc123 | Cdc123 | 1.02E-10 | 0.4577953 | 0.342 | 0.137 | 2.32E-06 | late aNSCs |
| Upf3b | Upf3b | 1.10E-10 | 0.457625234 | 0.404 | 0.174 | 2.49E-06 | late aNSCs |
| Ago2 | Ago2 | 1.12E-10 | 0.513241481 | 0.491 | 0.238 | 2.54E-06 | late aNSCs |
| Gon4l | Gon4l | 1.12E-10 | 0.568308233 | 0.578 | 0.296 | 2.55E-06 | late aNSCs |
| Hdgfl31 | Hdgfl3 | 1.13E-10 | 0.559464372 | 0.547 | 0.283 | 2.57E-06 | late aNSCs |
| Slc16a4 | Slc16a4 | 1.15E-10 | 0.411562792 | 0.261 | 0.091 | 2.61E-06 | late aNSCs |
| Rfc1 | Rfc1 | 1.17E-10 | 0.502347322 | 0.323 | 0.13 | 2.66E-06 | late aNSCs |
| Gm385051 | Gm38505 | 1.23E-10 | 0.474421054 | 0.516 | 0.242 | 2.79E-06 | late aNSCs |
| Pcm1 | Pcm1 | 1.35E-10 | 0.529338281 | 0.745 | 0.475 | 3.06E-06 | late aNSCs |
| Smg61 | Smg6 | 1.35E-10 | 0.512772221 | 0.776 | 0.489 | 3.07E-06 | late aNSCs |
| Akap61 | Akap6 | 1.36E-10 | 0.487611068 | 0.925 | 0.773 | 3.10E-06 | late aNSCs |
| Afdn1 | Afdn | 1.39E-10 | 0.591154988 | 0.547 | 0.295 | 3.15E-06 | late aNSCs |
| Anapc51 | Anapc5 | 1.42E-10 | 0.553966537 | 0.404 | 0.18 | 3.21E-06 | late aNSCs |
| Rev11 | Rev1 | 1.48E-10 | 0.61758762 | 0.484 | 0.246 | 3.35E-06 | late aNSCs |
| Ptma1 | Ptma | 1.53E-10 | 0.582932435 | 0.565 | 0.303 | 3.48E-06 | late aNSCs |
| Zfp62 | Zfp62 | 1.54E-10 | 0.399087687 | 0.292 | 0.107 | 3.51E-06 | late aNSCs |
| Sclt1 | Sclt1 | 1.58E-10 | 0.48674949 | 0.59 | 0.304 | 3.58E-06 | late aNSCs |
| Ptprs1 | Ptprs | 1.67E-10 | 0.619642769 | 0.702 | 0.441 | 3.79E-06 | late aNSCs |
| Rere1 | Rere | 1.69E-10 | 0.493583688 | 0.907 | 0.733 | 3.84E-06 | late aNSCs |
| Paxbp1 | Paxbp1 | 1.71E-10 | 0.545997703 | 0.559 | 0.294 | 3.88E-06 | late aNSCs |
| Trim371 | Trim37 | 1.77E-10 | 0.547258201 | 0.578 | 0.305 | 4.01E-06 | late aNSCs |
| Tardbp | Tardbp | 1.89E-10 | 0.536302617 | 0.472 | 0.229 | 4.30E-06 | late aNSCs |
| Ptprn21 | Ptprn2 | 1.90E-10 | 0.609823694 | 0.745 | 0.492 | 4.33E-06 | late aNSCs |
| Ankrd281 | Ankrd28 | 1.93E-10 | 0.58065395 | 0.634 | 0.358 | 4.39E-06 | late aNSCs |
| Chd2 | Chd2 | 1.99E-10 | 0.560412604 | 0.758 | 0.491 | 4.52E-06 | late aNSCs |
| Rnf1651 | Rnf165 | 2.01E-10 | 0.466634042 | 0.292 | 0.11 | 4.56E-06 | late aNSCs |
| Ift80 | Ift80 | 2.07E-10 | 0.495377716 | 0.36 | 0.152 | 4.70E-06 | late aNSCs |
| Smarce1 | Smarce1 | 2.11E-10 | 0.407951736 | 0.292 | 0.11 | 4.78E-06 | late aNSCs |
| Ptpn1 | Ptpn1 | 2.15E-10 | 0.433375854 | 0.311 | 0.12 | 4.88E-06 | late aNSCs |
| Mapk81 | Mapk8 | 2.40E-10 | 0.51840788 | 0.472 | 0.223 | 5.44E-06 | late aNSCs |
| Gatad2b | Gatad2b | 2.43E-10 | 0.589563434 | 0.652 | 0.4 | 5.52E-06 | late aNSCs |
| Glce | Glce | 2.58E-10 | 0.459035799 | 0.286 | 0.108 | 5.86E-06 | late aNSCs |
| Golim4 | Golim4 | 2.59E-10 | 0.478486936 | 0.354 | 0.152 | 5.89E-06 | late aNSCs |
| Lmo31 | Lmo3 | 2.70E-10 | 0.686422511 | 0.366 | 0.165 | 6.12E-06 | late aNSCs |
| Ddx1 | Ddx1 | 2.77E-10 | 0.400122357 | 0.298 | 0.113 | 6.30E-06 | late aNSCs |
| Ankrd11 | Ankrd11 | 2.96E-10 | 0.597145147 | 0.789 | 0.543 | 6.72E-06 | late aNSCs |
| Cadps1 | Cadps | 2.99E-10 | 0.39546423 | 0.64 | 0.359 | 6.79E-06 | late aNSCs |
| Sall3 | Sall3 | 3.09E-10 | 0.488109414 | 0.385 | 0.172 | 7.02E-06 | late aNSCs |
| Phactr4 | Phactr4 | 3.23E-10 | 0.476992412 | 0.41 | 0.183 | 7.33E-06 | late aNSCs |
| Sf3b3 | Sf3b3 | 3.27E-10 | 0.55014452 | 0.335 | 0.14 | 7.42E-06 | late aNSCs |
| Ppp2r5e1 | Ppp2r5e | 3.29E-10 | 0.583441151 | 0.634 | 0.363 | 7.47E-06 | late aNSCs |
| Sp91 | Sp9 | 3.32E-10 | 0.462761592 | 0.28 | 0.104 | 7.54E-06 | late aNSCs |
| Alms1 | Alms1 | 3.56E-10 | 0.518832794 | 0.571 | 0.301 | 8.10E-06 | late aNSCs |
| Rcor1 | Rcor1 | 3.57E-10 | 0.398969707 | 0.422 | 0.186 | 8.11E-06 | late aNSCs |
| Dph6 | Dph6 | 3.65E-10 | 0.507751746 | 0.329 | 0.136 | 8.29E-06 | late aNSCs |
| BC005561 | BC005561 | 3.72E-10 | 0.548515869 | 0.416 | 0.196 | 8.45E-06 | late aNSCs |
| Nono | Nono | 3.85E-10 | 0.411769708 | 0.348 | 0.141 | 8.74E-06 | late aNSCs |
| Ctnnal1 | Ctnnal1 | 3.94E-10 | 0.44675649 | 0.286 | 0.108 | 8.94E-06 | late aNSCs |
| Ncoa11 | Ncoa1 | 4.15E-10 | 0.546423558 | 0.901 | 0.681 | 9.42E-06 | late aNSCs |
| Hunk | Hunk | 4.69E-10 | 0.486708633 | 0.255 | 0.092 | 1.07E-05 | late aNSCs |
| Agps | Agps | 5.13E-10 | 0.484755116 | 0.453 | 0.215 | 1.17E-05 | late aNSCs |
| Msh3 | Msh3 | 5.16E-10 | 0.507028237 | 0.292 | 0.114 | 1.17E-05 | late aNSCs |
| Atxn2l | Atxn2l | 5.27E-10 | 0.497382302 | 0.453 | 0.215 | 1.20E-05 | late aNSCs |
| Tnpo3 | Tnpo3 | 5.65E-10 | 0.470229887 | 0.522 | 0.263 | 1.28E-05 | late aNSCs |
| Iws1 | Iws1 | 5.74E-10 | 0.463290475 | 0.373 | 0.16 | 1.30E-05 | late aNSCs |
| Nedd4 | Nedd4 | 5.90E-10 | 0.518257223 | 0.882 | 0.667 | 1.34E-05 | late aNSCs |
| Foxn31 | Foxn3 | 6.06E-10 | 0.531789905 | 0.87 | 0.632 | 1.38E-05 | late aNSCs |
| Nup153 | Nup153 | 6.17E-10 | 0.48463595 | 0.329 | 0.137 | 1.40E-05 | late aNSCs |
| Zfp821 | Zfp821 | 6.25E-10 | 0.475900029 | 0.298 | 0.12 | 1.42E-05 | late aNSCs |
| Ick | Ick | 6.34E-10 | 0.452251213 | 0.28 | 0.108 | 1.44E-05 | late aNSCs |
| Soga11 | Soga1 | 6.35E-10 | 0.497947573 | 0.36 | 0.158 | 1.44E-05 | late aNSCs |
| Kat6a | Kat6a | 6.49E-10 | 0.458556022 | 0.553 | 0.285 | 1.47E-05 | late aNSCs |
| Hipk2 | Hipk2 | 6.67E-10 | 0.635802666 | 0.758 | 0.526 | 1.52E-05 | late aNSCs |
| Naa15 | Naa15 | 7.28E-10 | 0.511872552 | 0.491 | 0.246 | 1.65E-05 | late aNSCs |
| Eif4e | Eif4e | 7.33E-10 | 0.460053017 | 0.36 | 0.157 | 1.66E-05 | late aNSCs |
| Slc20a2 | Slc20a2 | 7.34E-10 | 0.50788267 | 0.385 | 0.175 | 1.67E-05 | late aNSCs |
| Cisd2 | Cisd2 | 7.50E-10 | 0.461555724 | 0.329 | 0.136 | 1.70E-05 | late aNSCs |
| Tle11 | Tle1 | 7.65E-10 | 0.659800748 | 0.565 | 0.338 | 1.74E-05 | late aNSCs |
| Ttll51 | Ttll5 | 7.92E-10 | 0.483309259 | 0.46 | 0.217 | 1.80E-05 | late aNSCs |
| Rnf381 | Rnf38 | 8.24E-10 | 0.503655009 | 0.547 | 0.277 | 1.87E-05 | late aNSCs |
| Mbtps2 | Mbtps2 | 9.22E-10 | 0.389026552 | 0.335 | 0.135 | 2.09E-05 | late aNSCs |
| Cep1121 | Cep112 | 9.51E-10 | 0.689131751 | 0.429 | 0.216 | 2.16E-05 | late aNSCs |
| Bbx1 | Bbx | 1.01E-09 | 0.518811909 | 0.528 | 0.28 | 2.30E-05 | late aNSCs |
| Mdn1 | Mdn1 | 1.02E-09 | 0.41791095 | 0.335 | 0.138 | 2.32E-05 | late aNSCs |
| Tmem167 | Tmem167 | 1.02E-09 | 0.479776245 | 0.447 | 0.208 | 2.32E-05 | late aNSCs |
| Agfg1 | Agfg1 | 1.13E-09 | 0.485673625 | 0.398 | 0.184 | 2.56E-05 | late aNSCs |
| 5730522E02Rik1 | 5730522E02Rik | 1.17E-09 | 0.581389926 | 0.553 | 0.305 | 2.65E-05 | late aNSCs |
| Zcchc8 | Zcchc8 | 1.18E-09 | 0.374111907 | 0.335 | 0.137 | 2.67E-05 | late aNSCs |
| Zfp664 | Zfp664 | 1.21E-09 | 0.336197951 | 0.286 | 0.109 | 2.75E-05 | late aNSCs |
| Nfib1 | Nfib | 1.34E-09 | 0.412414455 | 1 | 0.918 | 3.03E-05 | late aNSCs |
| Tsc22d21 | Tsc22d2 | 1.38E-09 | 0.622216464 | 0.59 | 0.346 | 3.13E-05 | late aNSCs |
| Npm1 | Npm1 | 1.39E-09 | 0.551908199 | 0.292 | 0.119 | 3.15E-05 | late aNSCs |
| Timm9 | Timm9 | 1.41E-09 | 0.407614236 | 0.28 | 0.108 | 3.20E-05 | late aNSCs |
| Srpk1 | Srpk1 | 1.43E-09 | 0.470222076 | 0.323 | 0.134 | 3.26E-05 | late aNSCs |
| Cnot11 | Cnot1 | 1.44E-09 | 0.498050763 | 0.54 | 0.284 | 3.28E-05 | late aNSCs |
| Cdc27 | Cdc27 | 1.58E-09 | 0.468408819 | 0.404 | 0.19 | 3.59E-05 | late aNSCs |
| Mettl9 | Mettl9 | 1.60E-09 | 0.45958985 | 0.335 | 0.141 | 3.64E-05 | late aNSCs |
| Map3k3 | Map3k3 | 1.60E-09 | 0.485187969 | 0.509 | 0.262 | 3.65E-05 | late aNSCs |
| Gdpd11 | Gdpd1 | 1.67E-09 | 0.430708166 | 0.348 | 0.15 | 3.80E-05 | late aNSCs |
| Srsf4 | Srsf4 | 1.69E-09 | 0.534384796 | 0.41 | 0.199 | 3.83E-05 | late aNSCs |
| Rcbtb2 | Rcbtb2 | 1.72E-09 | 0.380226167 | 0.329 | 0.137 | 3.90E-05 | late aNSCs |
| Igfbpl11 | Igfbpl1 | 1.83E-09 | 0.395418732 | 0.292 | 0.115 | 4.17E-05 | late aNSCs |
| Klhdc2 | Klhdc2 | 1.85E-09 | 0.410538405 | 0.292 | 0.116 | 4.20E-05 | late aNSCs |
| Eml51 | Eml5 | 1.98E-09 | 0.748237846 | 0.534 | 0.312 | 4.50E-05 | late aNSCs |
| Prpf40a | Prpf40a | 2.01E-09 | 0.455872824 | 0.565 | 0.308 | 4.57E-05 | late aNSCs |
| Cbfa2t2 | Cbfa2t2 | 2.07E-09 | 0.589263635 | 0.571 | 0.333 | 4.70E-05 | late aNSCs |
| Parp11 | Parp11 | 2.18E-09 | 0.413971123 | 0.317 | 0.129 | 4.96E-05 | late aNSCs |
| Kcnq1ot12 | Kcnq1ot1 | 2.20E-09 | 0.501426595 | 0.497 | 0.253 | 4.99E-05 | late aNSCs |
| Hs2st1 | Hs2st1 | 2.26E-09 | 0.673709572 | 0.652 | 0.41 | 5.12E-05 | late aNSCs |
| Rapgef61 | Rapgef6 | 2.26E-09 | 0.533611065 | 0.559 | 0.31 | 5.13E-05 | late aNSCs |
| 8030462N17Rik | 8030462N17Rik | 2.27E-09 | 0.483354757 | 0.404 | 0.187 | 5.15E-05 | late aNSCs |
| Slc25a271 | Slc25a27 | 2.29E-09 | 0.488151879 | 0.398 | 0.185 | 5.20E-05 | late aNSCs |
| Pspc1 | Pspc1 | 2.70E-09 | 0.486630632 | 0.516 | 0.271 | 6.14E-05 | late aNSCs |
| Slc9a1 | Slc9a1 | 3.03E-09 | 0.339868367 | 0.28 | 0.108 | 6.88E-05 | late aNSCs |
| Rsf1 | Rsf1 | 3.17E-09 | 0.535462925 | 0.708 | 0.442 | 7.19E-05 | late aNSCs |
| Ckap51 | Ckap5 | 3.17E-09 | 0.622723603 | 0.714 | 0.5 | 7.20E-05 | late aNSCs |
| Tcf41 | Tcf4 | 3.19E-09 | 0.400695228 | 0.975 | 0.964 | 7.26E-05 | late aNSCs |
| Ppp3cb1 | Ppp3cb | 3.33E-09 | 0.410215902 | 0.559 | 0.288 | 7.57E-05 | late aNSCs |
| Mpdz1 | Mpdz | 3.55E-09 | 0.55310387 | 0.441 | 0.228 | 8.07E-05 | late aNSCs |
| Nfia1 | Nfia | 3.61E-09 | 0.429877029 | 1 | 0.896 | 8.20E-05 | late aNSCs |
| Mettl15 | Mettl15 | 3.81E-09 | 0.620970442 | 0.36 | 0.168 | 8.66E-05 | late aNSCs |
| Srcin1 | Srcin1 | 4.11E-09 | 0.458323453 | 0.342 | 0.149 | 9.35E-05 | late aNSCs |
| Agap11 | Agap1 | 4.24E-09 | 0.498016225 | 0.621 | 0.359 | 9.63E-05 | late aNSCs |
| Creb11 | Creb1 | 4.29E-09 | 0.530467721 | 0.547 | 0.304 | 9.74E-05 | late aNSCs |
| Cald11 | Cald1 | 4.35E-09 | 0.269535881 | 0.255 | 0.093 | 9.87E-05 | late aNSCs |
| Capn15 | Capn15 | 4.56E-09 | 0.384528143 | 0.366 | 0.162 | 0.000103566 | late aNSCs |
| Tfdp2 | Tfdp2 | 4.70E-09 | 0.569399228 | 0.484 | 0.255 | 0.000106748 | late aNSCs |
| Rsf1os1 | Rsf1os1 | 4.80E-09 | 0.388143641 | 0.273 | 0.107 | 0.0001091 | late aNSCs |
| Slc9a8 | Slc9a8 | 4.85E-09 | 0.398648407 | 0.261 | 0.102 | 0.00011022 | late aNSCs |
| Mn1 | Mn1 | 4.92E-09 | 0.410682006 | 0.255 | 0.096 | 0.000111773 | late aNSCs |
| Psip11 | Psip1 | 4.93E-09 | 0.534035863 | 0.596 | 0.346 | 0.000111926 | late aNSCs |
| 9330182L06Rik | 9330182L06Rik | 5.06E-09 | 0.432367255 | 0.292 | 0.119 | 0.000114858 | late aNSCs |
| Gmds | Gmds | 5.12E-09 | 0.509406419 | 0.429 | 0.216 | 0.000116316 | late aNSCs |
| Rdx | Rdx | 5.16E-09 | 0.583835242 | 0.398 | 0.193 | 0.000117254 | late aNSCs |
| Hnrnpl | Hnrnpl | 5.27E-09 | 0.491899227 | 0.466 | 0.237 | 0.000119735 | late aNSCs |
| Hsd17b12 | Hsd17b12 | 5.60E-09 | 0.497802301 | 0.342 | 0.151 | 0.000127211 | late aNSCs |
| Supt16 | Supt16 | 5.83E-09 | 0.536401309 | 0.335 | 0.151 | 0.0001325 | late aNSCs |
| Rnd3 | Rnd3 | 6.68E-09 | 0.426005126 | 0.329 | 0.144 | 0.000151694 | late aNSCs |
| Med14 | Med14 | 6.84E-09 | 0.542448922 | 0.36 | 0.17 | 0.000155378 | late aNSCs |
| Zfp1481 | Zfp148 | 6.97E-09 | 0.501183499 | 0.702 | 0.446 | 0.000158328 | late aNSCs |
| Esf1 | Esf1 | 8.65E-09 | 0.393787066 | 0.311 | 0.132 | 0.000196374 | late aNSCs |
| Myo5a1 | Myo5a | 8.82E-09 | 0.447325386 | 0.578 | 0.316 | 0.000200328 | late aNSCs |
| Pkig | Pkig | 9.62E-09 | 0.457265611 | 0.335 | 0.151 | 0.000218427 | late aNSCs |
| Fam208b | Fam208b | 9.99E-09 | 0.430501214 | 0.41 | 0.201 | 0.000226997 | late aNSCs |
| Sbf21 | Sbf2 | 1.06E-08 | 0.561970457 | 0.702 | 0.48 | 0.000241766 | late aNSCs |
| Etv11 | Etv1 | 1.07E-08 | 0.600854564 | 0.41 | 0.202 | 0.000243473 | late aNSCs |
| Ncoa3 | Ncoa3 | 1.09E-08 | 0.472342098 | 0.317 | 0.138 | 0.000246754 | late aNSCs |
| Fam92a | Fam92a | 1.12E-08 | 0.362734695 | 0.273 | 0.11 | 0.000255194 | late aNSCs |
| Dcx1 | Dcx | 1.14E-08 | 0.27526266 | 0.441 | 0.209 | 0.000259891 | late aNSCs |
| 3-Sep | 3-Sep | 1.15E-08 | 0.348413085 | 0.28 | 0.112 | 0.000260212 | late aNSCs |
| Csde1 | Csde1 | 1.15E-08 | 0.454290087 | 0.503 | 0.267 | 0.000261416 | late aNSCs |
| Znrf11 | Znrf1 | 1.21E-08 | 0.422589088 | 0.497 | 0.254 | 0.000275389 | late aNSCs |
| Hpf1 | Hpf1 | 1.22E-08 | 0.33187173 | 0.255 | 0.099 | 0.000276835 | late aNSCs |
| Rasal21 | Rasal2 | 1.23E-08 | 0.515250508 | 0.683 | 0.444 | 0.000279878 | late aNSCs |
| Rapgef1 | Rapgef1 | 1.23E-08 | 0.498298804 | 0.453 | 0.227 | 0.000280191 | late aNSCs |
| Zfand6 | Zfand6 | 1.25E-08 | 0.524621164 | 0.497 | 0.27 | 0.000283471 | late aNSCs |
| Pantr1 | Pantr1 | 1.28E-08 | 0.508349988 | 0.646 | 0.379 | 0.000290641 | late aNSCs |
| Esyt2 | Esyt2 | 1.34E-08 | 0.440160111 | 0.534 | 0.289 | 0.000304407 | late aNSCs |
| Srsf6 | Srsf6 | 1.35E-08 | 0.445690464 | 0.385 | 0.182 | 0.00030582 | late aNSCs |
| Smad2 | Smad2 | 1.35E-08 | 0.473483373 | 0.385 | 0.184 | 0.000307014 | late aNSCs |
| Plaa | Plaa | 1.39E-08 | 0.488012381 | 0.329 | 0.148 | 0.000314773 | late aNSCs |
| Fktn | Fktn | 1.41E-08 | 0.391003631 | 0.342 | 0.151 | 0.000320491 | late aNSCs |
| Cers51 | Cers5 | 1.43E-08 | 0.411468811 | 0.385 | 0.18 | 0.000324214 | late aNSCs |
| Mettl16 | Mettl16 | 1.49E-08 | 0.435423659 | 0.311 | 0.134 | 0.000337896 | late aNSCs |
| Clock | Clock | 1.49E-08 | 0.480565045 | 0.441 | 0.222 | 0.000339071 | late aNSCs |
| Cenpv | Cenpv | 1.54E-08 | 0.368766394 | 0.267 | 0.108 | 0.000348712 | late aNSCs |
| Nova2 | Nova2 | 1.56E-08 | 0.401007706 | 0.292 | 0.121 | 0.000353765 | late aNSCs |
| Pogz | Pogz | 1.61E-08 | 0.441969003 | 0.422 | 0.211 | 0.000365862 | late aNSCs |
| Bsn | Bsn | 1.62E-08 | 0.367667744 | 0.273 | 0.111 | 0.00036792 | late aNSCs |
| Pknox21 | Pknox2 | 1.63E-08 | 0.433029378 | 0.472 | 0.233 | 0.000369769 | late aNSCs |
| Pam1 | Pam | 1.68E-08 | 0.540085356 | 0.665 | 0.426 | 0.000380723 | late aNSCs |
| Ppp1r9a1 | Ppp1r9a | 1.68E-08 | 0.452427994 | 0.876 | 0.669 | 0.000382113 | late aNSCs |
| Setx | Setx | 1.72E-08 | 0.418368729 | 0.491 | 0.255 | 0.000389652 | late aNSCs |
| Pkn2 | Pkn2 | 1.72E-08 | 0.455015173 | 0.578 | 0.33 | 0.000391508 | late aNSCs |
| Fnbp4 | Fnbp4 | 1.75E-08 | 0.491576975 | 0.447 | 0.24 | 0.000396702 | late aNSCs |
| Ddx39b | Ddx39b | 1.81E-08 | 0.468599926 | 0.292 | 0.126 | 0.000410762 | late aNSCs |
| Rhobtb31 | Rhobtb3 | 1.82E-08 | 0.387896342 | 0.435 | 0.214 | 0.00041353 | late aNSCs |
| Fbxl2 | Fbxl2 | 1.83E-08 | 0.334285461 | 0.292 | 0.12 | 0.000416748 | late aNSCs |
| Camsap11 | Camsap1 | 1.84E-08 | 0.410758704 | 0.441 | 0.22 | 0.000418524 | late aNSCs |
| Top2b1 | Top2b | 1.84E-08 | 0.473457906 | 0.534 | 0.302 | 0.000418775 | late aNSCs |
| Gm5577 | Gm5577 | 1.86E-08 | 0.435107023 | 0.286 | 0.121 | 0.000423088 | late aNSCs |
| Dcbld11 | Dcbld1 | 1.87E-08 | 0.416043545 | 0.311 | 0.135 | 0.000424969 | late aNSCs |
| Mphosph8 | Mphosph8 | 1.88E-08 | 0.444698949 | 0.348 | 0.159 | 0.000426241 | late aNSCs |
| Me3 | Me3 | 1.88E-08 | 0.613964745 | 0.292 | 0.13 | 0.000427509 | late aNSCs |
| H3f3b1 | H3f3b | 1.98E-08 | 0.43096741 | 0.478 | 0.242 | 0.000449407 | late aNSCs |
| Pdss2 | Pdss2 | 1.99E-08 | 0.361036243 | 0.547 | 0.29 | 0.000451755 | late aNSCs |
| Tmeff11 | Tmeff1 | 2.01E-08 | 0.352974037 | 0.41 | 0.196 | 0.000457397 | late aNSCs |
| Luc7l | Luc7l | 2.04E-08 | 0.435101708 | 0.422 | 0.209 | 0.000464278 | late aNSCs |
| Bicra | Bicra | 2.16E-08 | 0.498427955 | 0.484 | 0.256 | 0.000490206 | late aNSCs |
| 1700025G04Rik | 1700025G04Rik | 2.19E-08 | 0.585193054 | 0.317 | 0.145 | 0.000496454 | late aNSCs |
| Nr2c2 | Nr2c2 | 2.26E-08 | 0.434923713 | 0.634 | 0.355 | 0.000512664 | late aNSCs |
| Sestd11 | Sestd1 | 2.28E-08 | 0.43216467 | 0.335 | 0.151 | 0.000517476 | late aNSCs |
| Sap130 | Sap130 | 2.32E-08 | 0.455008518 | 0.404 | 0.201 | 0.000527348 | late aNSCs |
| Ywhaq1 | Ywhaq | 2.48E-08 | 0.407723484 | 0.534 | 0.287 | 0.000562249 | late aNSCs |
| Prr14l | Prr14l | 2.81E-08 | 0.270197312 | 0.292 | 0.119 | 0.000637362 | late aNSCs |
| Rad54l2 | Rad54l2 | 2.85E-08 | 0.433402037 | 0.28 | 0.12 | 0.000647815 | late aNSCs |
| Prdm10 | Prdm10 | 2.94E-08 | 0.447910736 | 0.311 | 0.139 | 0.00066887 | late aNSCs |
| Ankrd61 | Ankrd6 | 3.03E-08 | 0.677894072 | 0.652 | 0.431 | 0.000688394 | late aNSCs |
| Scaf11 | Scaf11 | 3.16E-08 | 0.456778866 | 0.429 | 0.22 | 0.000718189 | late aNSCs |
| Atp11b | Atp11b | 3.39E-08 | 0.517914021 | 0.416 | 0.218 | 0.000769275 | late aNSCs |
| Apex2 | Apex2 | 3.47E-08 | 0.441497861 | 0.379 | 0.185 | 0.000789028 | late aNSCs |
| Rprd1b | Rprd1b | 3.53E-08 | 0.435676192 | 0.267 | 0.112 | 0.000800957 | late aNSCs |
| Zfp5321 | Zfp532 | 3.55E-08 | 0.502280475 | 0.665 | 0.426 | 0.000807377 | late aNSCs |
| Gmps | Gmps | 3.56E-08 | 0.453434723 | 0.342 | 0.156 | 0.00080831 | late aNSCs |
| Rbm25 | Rbm25 | 3.67E-08 | 0.499806081 | 0.801 | 0.565 | 0.000833943 | late aNSCs |
| Kdm1a1 | Kdm1a | 3.93E-08 | 0.411835855 | 0.429 | 0.216 | 0.000891646 | late aNSCs |
| Usp32 | Usp3 | 3.94E-08 | 0.420075145 | 0.509 | 0.269 | 0.000894372 | late aNSCs |
| Anapc10 | Anapc10 | 4.03E-08 | 0.488565439 | 0.335 | 0.157 | 0.000914609 | late aNSCs |
| Cand1 | Cand1 | 4.04E-08 | 0.318777447 | 0.261 | 0.104 | 0.000917935 | late aNSCs |
| Bmper1 | Bmper | 4.16E-08 | 0.353628519 | 0.46 | 0.237 | 0.000945785 | late aNSCs |
| Ppp4r2 | Ppp4r2 | 4.26E-08 | 0.471325416 | 0.404 | 0.203 | 0.000968088 | late aNSCs |
| Agk | Agk | 4.26E-08 | 0.419726848 | 0.342 | 0.159 | 0.0009683 | late aNSCs |
| Nup98 | Nup98 | 4.33E-08 | 0.439293912 | 0.484 | 0.264 | 0.000982723 | late aNSCs |
| Chic2 | Chic2 | 4.47E-08 | 0.450216172 | 0.478 | 0.254 | 0.001015834 | late aNSCs |
| Arhgap21 | Arhgap21 | 4.54E-08 | 0.516631557 | 0.733 | 0.478 | 0.001032302 | late aNSCs |
| Ccdc138 | Ccdc138 | 4.55E-08 | 0.445897455 | 0.342 | 0.162 | 0.001033738 | late aNSCs |
| Gpr137c1 | Gpr137c | 4.78E-08 | 0.537309036 | 0.497 | 0.279 | 0.001085164 | late aNSCs |
| Usp31 | Usp31 | 4.89E-08 | 0.341296264 | 0.261 | 0.107 | 0.001109655 | late aNSCs |
| Rbfox21 | Rbfox2 | 5.06E-08 | 0.5527083 | 0.764 | 0.542 | 0.001149635 | late aNSCs |
| Tubgcp5 | Tubgcp5 | 5.13E-08 | 0.347847297 | 0.317 | 0.14 | 0.0011663 | late aNSCs |
| Ppp1cb | Ppp1cb | 5.14E-08 | 0.448095078 | 0.565 | 0.327 | 0.001168183 | late aNSCs |
| Map2k5 | Map2k5 | 5.15E-08 | 0.460527663 | 0.509 | 0.286 | 0.001170582 | late aNSCs |
| Cntrl | Cntrl | 5.20E-08 | 0.436471017 | 0.28 | 0.123 | 0.001181058 | late aNSCs |
| U2af1 | U2af1 | 5.20E-08 | 0.309572533 | 0.261 | 0.105 | 0.001181064 | late aNSCs |
| Ranbp17 | Ranbp17 | 5.69E-08 | 0.525731728 | 0.441 | 0.235 | 0.001292141 | late aNSCs |
| Hnrnph1 | Hnrnph1 | 5.83E-08 | 0.431416443 | 0.553 | 0.305 | 0.001325101 | late aNSCs |
| Yaf2 | Yaf2 | 5.85E-08 | 0.39230118 | 0.366 | 0.175 | 0.00132829 | late aNSCs |
| Atrx1 | Atrx | 5.86E-08 | 0.493184202 | 0.752 | 0.545 | 0.001330991 | late aNSCs |
| Pak2 | Pak2 | 5.88E-08 | 0.379950499 | 0.466 | 0.239 | 0.001336644 | late aNSCs |
| Dennd5a | Dennd5a | 5.90E-08 | 0.475473806 | 0.553 | 0.321 | 0.001339712 | late aNSCs |
| Uhrf1bp1l | Uhrf1bp1l | 6.13E-08 | 0.403630707 | 0.292 | 0.128 | 0.001393427 | late aNSCs |
| Polr2a | Polr2a | 6.15E-08 | 0.493903333 | 0.304 | 0.141 | 0.001396248 | late aNSCs |
| Papola | Papola | 6.28E-08 | 0.467484679 | 0.596 | 0.37 | 0.001425921 | late aNSCs |
| Zc3h7a | Zc3h7a | 6.42E-08 | 0.404627048 | 0.366 | 0.177 | 0.001458998 | late aNSCs |
| Sox62 | Sox6 | 6.65E-08 | 0.531579542 | 0.894 | 0.731 | 0.00151106 | late aNSCs |
| Wac | Wac | 6.82E-08 | 0.399813971 | 0.652 | 0.398 | 0.001549136 | late aNSCs |
| Ipo7 | Ipo7 | 6.89E-08 | 0.361703857 | 0.286 | 0.123 | 0.001565088 | late aNSCs |
| Zfp6381 | Zfp638 | 7.19E-08 | 0.531517758 | 0.733 | 0.548 | 0.001633751 | late aNSCs |
| Gm206871 | Gm20687 | 7.23E-08 | 0.374626446 | 0.354 | 0.164 | 0.001642775 | late aNSCs |
| Cpsf7 | Cpsf7 | 7.37E-08 | 0.400130378 | 0.435 | 0.22 | 0.001674142 | late aNSCs |
| Manf | Manf | 7.90E-08 | 0.412179316 | 0.329 | 0.152 | 0.001793946 | late aNSCs |
| Otud4 | Otud4 | 8.09E-08 | 0.391053967 | 0.354 | 0.165 | 0.00183686 | late aNSCs |
| Ssb | Ssb | 8.33E-08 | 0.463551587 | 0.404 | 0.199 | 0.001890914 | late aNSCs |
| Tnrc18 | Tnrc18 | 9.02E-08 | 0.478854128 | 0.677 | 0.42 | 0.002048128 | late aNSCs |
| Sufu | Sufu | 9.58E-08 | 0.317078291 | 0.261 | 0.108 | 0.002176224 | late aNSCs |
| Plcl21 | Plcl2 | 9.63E-08 | 0.432540067 | 0.46 | 0.242 | 0.002188392 | late aNSCs |
| Kansl2 | Kansl2 | 9.85E-08 | 0.410198606 | 0.267 | 0.114 | 0.00223782 | late aNSCs |
| Jazf1 | Jazf1 | 9.93E-08 | 0.468573761 | 0.317 | 0.151 | 0.002254299 | late aNSCs |
| Yy1 | Yy1 | 1.03E-07 | 0.405736552 | 0.317 | 0.147 | 0.002350631 | late aNSCs |
| Frmd51 | Frmd5 | 1.15E-07 | 0.434408214 | 0.466 | 0.255 | 0.002601887 | late aNSCs |
| Sacs | Sacs | 1.21E-07 | 0.411516788 | 0.267 | 0.114 | 0.002747776 | late aNSCs |
| Cdyl | Cdyl | 1.28E-07 | 0.382120015 | 0.261 | 0.111 | 0.002908991 | late aNSCs |
| Rbm10 | Rbm10 | 1.29E-07 | 0.350045076 | 0.311 | 0.139 | 0.002927339 | late aNSCs |
| Kif5c1 | Kif5c | 1.30E-07 | 0.4012546 | 0.398 | 0.201 | 0.002946987 | late aNSCs |
| Eif2s2 | Eif2s2 | 1.33E-07 | 0.355072993 | 0.286 | 0.126 | 0.003010454 | late aNSCs |
| Pdss1 | Pdss1 | 1.35E-07 | 0.332333415 | 0.292 | 0.13 | 0.003060626 | late aNSCs |
| Ankhd1 | Ankhd1 | 1.44E-07 | 0.455983425 | 0.714 | 0.475 | 0.00327105 | late aNSCs |
| Drg1 | Drg1 | 1.46E-07 | 0.496152618 | 0.466 | 0.257 | 0.003317042 | late aNSCs |
| Matr3 | Matr3 | 1.50E-07 | 0.459622953 | 0.559 | 0.338 | 0.003399953 | late aNSCs |
| Plekha51 | Plekha5 | 1.51E-07 | 0.372639167 | 0.714 | 0.445 | 0.003423225 | late aNSCs |
| Apopt1 | Apopt1 | 1.51E-07 | 0.304053816 | 0.267 | 0.113 | 0.003423958 | late aNSCs |
| Eif4g21 | Eif4g2 | 1.59E-07 | 0.343996061 | 0.435 | 0.227 | 0.003603047 | late aNSCs |
| Rai11 | Rai1 | 1.65E-07 | 0.480759806 | 0.472 | 0.266 | 0.003751431 | late aNSCs |
| Clcn5 | Clcn5 | 1.66E-07 | 0.363545461 | 0.28 | 0.124 | 0.003779633 | late aNSCs |
| Zfand4 | Zfand4 | 1.69E-07 | 0.290243843 | 0.28 | 0.121 | 0.003843227 | late aNSCs |
| E130308A19Rik1 | E130308A19Rik | 1.71E-07 | 0.410270793 | 0.404 | 0.209 | 0.00387986 | late aNSCs |
| Rbm61 | Rbm6 | 1.74E-07 | 0.440764559 | 0.789 | 0.556 | 0.003961951 | late aNSCs |
| Smim4 | Smim4 | 1.76E-07 | 0.381815299 | 0.323 | 0.153 | 0.004002026 | late aNSCs |
| Rbm26 | Rbm26 | 1.77E-07 | 0.41226095 | 0.801 | 0.532 | 0.004010082 | late aNSCs |
| Pwwp2a | Pwwp2a | 1.84E-07 | 0.438903867 | 0.404 | 0.213 | 0.004175698 | late aNSCs |
| Gm268481 | Gm26848 | 1.87E-07 | 0.431147253 | 0.59 | 0.354 | 0.004255123 | late aNSCs |
| Dip2b1 | Dip2b | 1.91E-07 | 0.438318645 | 0.683 | 0.423 | 0.004340534 | late aNSCs |
| Acin1 | Acin1 | 2.07E-07 | 0.441179284 | 0.547 | 0.329 | 0.004706431 | late aNSCs |
| Nbea1 | Nbea | 2.15E-07 | 0.474392638 | 0.87 | 0.709 | 0.004883253 | late aNSCs |
| Usp22 | Usp22 | 2.16E-07 | 0.267147225 | 0.342 | 0.156 | 0.004905828 | late aNSCs |
| Sik2 | Sik2 | 2.16E-07 | 0.459803098 | 0.41 | 0.216 | 0.004914593 | late aNSCs |
| Mms19 | Mms19 | 2.27E-07 | 0.333733354 | 0.317 | 0.147 | 0.005157172 | late aNSCs |
| Gabrb31 | Gabrb3 | 2.33E-07 | 0.348706361 | 0.745 | 0.475 | 0.005291603 | late aNSCs |
| Exoc5 | Exoc5 | 2.38E-07 | 0.373187795 | 0.46 | 0.248 | 0.005406654 | late aNSCs |
| Gm15614 | Gm15614 | 2.40E-07 | 0.378753012 | 0.311 | 0.141 | 0.005460708 | late aNSCs |
| Fbxw71 | Fbxw7 | 2.43E-07 | 0.542476961 | 0.404 | 0.22 | 0.005520124 | late aNSCs |
| Gtf2ird12 | Gtf2ird1 | 2.45E-07 | 0.317919539 | 0.422 | 0.212 | 0.005574206 | late aNSCs |
| Dhdds1 | Dhdds | 2.47E-07 | 0.418846315 | 0.373 | 0.189 | 0.005603238 | late aNSCs |
| Zfp6091 | Zfp609 | 2.47E-07 | 0.495792283 | 0.683 | 0.455 | 0.005603994 | late aNSCs |
| Gm30054 | Gm30054 | 2.47E-07 | 0.298368374 | 0.261 | 0.111 | 0.005613599 | late aNSCs |
| Sec62 | Sec62 | 2.59E-07 | 0.375204935 | 0.435 | 0.226 | 0.005884298 | late aNSCs |
| Eefsec | Eefsec | 2.67E-07 | 0.491983215 | 0.273 | 0.127 | 0.00607533 | late aNSCs |
| Dnajc8 | Dnajc8 | 2.79E-07 | 0.336120273 | 0.261 | 0.111 | 0.006344303 | late aNSCs |
| Emsy | Emsy | 2.85E-07 | 0.485292356 | 0.497 | 0.289 | 0.006470398 | late aNSCs |
| Erbin | Erbin | 3.09E-07 | 0.426909108 | 0.665 | 0.422 | 0.00701819 | late aNSCs |
| Ralgps11 | Ralgps1 | 3.10E-07 | 0.357937668 | 0.484 | 0.263 | 0.007052377 | late aNSCs |
| Syt141 | Syt14 | 3.12E-07 | 0.371876277 | 0.335 | 0.159 | 0.007078343 | late aNSCs |
| Klhl13 | Klhl13 | 3.19E-07 | 0.384540685 | 0.304 | 0.141 | 0.007252018 | late aNSCs |
| Mllt10 | Mllt10 | 3.40E-07 | 0.451726123 | 0.801 | 0.615 | 0.007714668 | late aNSCs |
| Larp4b | Larp4b | 3.60E-07 | 0.416494673 | 0.516 | 0.293 | 0.008178146 | late aNSCs |
| Elavl1 | Elavl1 | 3.61E-07 | 0.360488587 | 0.453 | 0.242 | 0.008195948 | late aNSCs |
| Spopl | Spopl | 3.66E-07 | 0.341685413 | 0.348 | 0.168 | 0.008311095 | late aNSCs |
| Lcor1 | Lcor | 3.75E-07 | 0.407334214 | 0.652 | 0.407 | 0.00850791 | late aNSCs |
| Babam2 | Babam2 | 3.81E-07 | 0.460390887 | 0.528 | 0.314 | 0.008658361 | late aNSCs |
| Mnat1 | Mnat1 | 3.81E-07 | 0.521639053 | 0.398 | 0.216 | 0.008660082 | late aNSCs |
| Fxr1 | Fxr1 | 3.82E-07 | 0.445425913 | 0.472 | 0.271 | 0.008680714 | late aNSCs |
| Myo9b | Myo9b | 3.86E-07 | 0.406375656 | 0.323 | 0.155 | 0.008766583 | late aNSCs |
| Nsd1 | Nsd1 | 3.94E-07 | 0.376344368 | 0.845 | 0.619 | 0.008959305 | late aNSCs |
| Chd1 | Chd1 | 4.06E-07 | 0.394810939 | 0.466 | 0.256 | 0.009229577 | late aNSCs |
| Etv6 | Etv6 | 4.08E-07 | 0.351607924 | 0.553 | 0.315 | 0.0092587 | late aNSCs |
| Tada2a | Tada2a | 4.11E-07 | 0.380206889 | 0.286 | 0.13 | 0.009344259 | late aNSCs |
| 3110039M20Rik | 3110039M20Rik | 4.25E-07 | 0.39387568 | 0.348 | 0.173 | 0.009649379 | late aNSCs |
| Prdm2 | Prdm2 | 4.27E-07 | 0.435059836 | 0.404 | 0.219 | 0.009696675 | late aNSCs |
| 11-Mar | 1-Mar | 4.37E-07 | 0.284086118 | 0.553 | 0.332 | 0.009926304 | late aNSCs |
| Kras | Kras | 4.46E-07 | 0.444570419 | 0.317 | 0.153 | 0.010123954 | late aNSCs |
| Dazap1 | Dazap1 | 4.53E-07 | 0.331193036 | 0.342 | 0.166 | 0.01027985 | late aNSCs |
| Raf1 | Raf1 | 4.57E-07 | 0.403510107 | 0.503 | 0.282 | 0.010385173 | late aNSCs |
| Smarca5 | Smarca5 | 4.58E-07 | 0.413304553 | 0.373 | 0.187 | 0.010395636 | late aNSCs |
| Gng21 | Gng2 | 4.58E-07 | 0.327959272 | 0.373 | 0.185 | 0.010401582 | late aNSCs |
| Nsmce2 | Nsmce2 | 4.61E-07 | 0.491218616 | 0.596 | 0.388 | 0.010461223 | late aNSCs |
| Zfp800 | Zfp800 | 4.79E-07 | 0.499374402 | 0.261 | 0.118 | 0.010876059 | late aNSCs |
| Dzip3 | Dzip3 | 4.85E-07 | 0.406666533 | 0.516 | 0.296 | 0.011015587 | late aNSCs |
| Ube2e31 | Ube2e3 | 4.90E-07 | 0.342379062 | 0.379 | 0.191 | 0.011133585 | late aNSCs |
| Cep1701 | Cep170 | 4.94E-07 | 0.321677069 | 0.559 | 0.317 | 0.011217145 | late aNSCs |
| Pcbp31 | Pcbp3 | 4.94E-07 | 0.302941138 | 0.36 | 0.178 | 0.011225498 | late aNSCs |
| Cept1 | Cept1 | 4.94E-07 | 0.354459092 | 0.354 | 0.177 | 0.011226138 | late aNSCs |
| Micu2 | Micu2 | 5.03E-07 | 0.325226083 | 0.329 | 0.157 | 0.01143074 | late aNSCs |
| Ccdc82 | Ccdc82 | 5.08E-07 | 0.347226623 | 0.267 | 0.118 | 0.011549465 | late aNSCs |
| Nrf1 | Nrf1 | 5.10E-07 | 0.532350489 | 0.689 | 0.482 | 0.011588137 | late aNSCs |
| Hmbox11 | Hmbox1 | 5.14E-07 | 0.368242783 | 0.509 | 0.286 | 0.011678392 | late aNSCs |
| C130071C03Rik1 | C130071C03Rik | 5.32E-07 | 0.469075702 | 0.851 | 0.713 | 0.01207365 | late aNSCs |
| Sarnp | Sarnp | 5.35E-07 | 0.417330729 | 0.497 | 0.283 | 0.012157911 | late aNSCs |
| Papd4 | Papd4 | 5.40E-07 | 0.446456227 | 0.484 | 0.274 | 0.012270329 | late aNSCs |
| Phf20 | Phf20 | 5.46E-07 | 0.305741314 | 0.578 | 0.323 | 0.012393526 | late aNSCs |
| 0610010F05Rik | 0610010F05Rik | 5.59E-07 | 0.382719598 | 0.298 | 0.138 | 0.012695568 | late aNSCs |
| Shtn11 | Shtn1 | 5.68E-07 | 0.693142957 | 0.404 | 0.227 | 0.01289017 | late aNSCs |
| Ppip5k21 | Ppip5k2 | 5.84E-07 | 0.371896771 | 0.323 | 0.157 | 0.013255194 | late aNSCs |
| Cecr2 | Cecr2 | 5.90E-07 | 0.583396727 | 0.429 | 0.244 | 0.01339581 | late aNSCs |
| Phtf21 | Phtf2 | 5.94E-07 | 0.281041041 | 0.317 | 0.147 | 0.013498333 | late aNSCs |
| Paip1 | Paip1 | 5.96E-07 | 0.251883255 | 0.267 | 0.116 | 0.013530782 | late aNSCs |
| Rnf111 | Rnf111 | 6.11E-07 | 0.406722326 | 0.441 | 0.234 | 0.01388176 | late aNSCs |
| Gm26518 | Gm26518 | 6.17E-07 | 0.283853163 | 0.379 | 0.186 | 0.014007961 | late aNSCs |
| Zcchc141 | Zcchc14 | 6.26E-07 | 0.324470782 | 0.503 | 0.275 | 0.014215937 | late aNSCs |
| Zswim5 | Zswim5 | 6.42E-07 | 0.447855759 | 0.41 | 0.221 | 0.014588496 | late aNSCs |
| Gm26836 | Gm26836 | 6.50E-07 | 0.312357696 | 0.366 | 0.182 | 0.014764432 | late aNSCs |
| Dpysl21 | Dpysl2 | 6.52E-07 | 0.45329504 | 0.652 | 0.436 | 0.014799141 | late aNSCs |
| Tmem68 | Tmem68 | 6.63E-07 | 0.349546806 | 0.273 | 0.124 | 0.015055422 | late aNSCs |
| Stx12 | Stx12 | 6.64E-07 | 0.323326762 | 0.261 | 0.115 | 0.015083069 | late aNSCs |
| Cep78 | Cep78 | 6.78E-07 | 0.388111606 | 0.267 | 0.123 | 0.015398776 | late aNSCs |
| Msl2 | Msl2 | 7.14E-07 | 0.34932325 | 0.292 | 0.137 | 0.016214806 | late aNSCs |
| Kpnb1 | Kpnb1 | 7.21E-07 | 0.362402511 | 0.273 | 0.126 | 0.016377175 | late aNSCs |
| Ascc3 | Ascc3 | 7.32E-07 | 0.443220827 | 0.509 | 0.294 | 0.016633614 | late aNSCs |
| Acvr11 | Acvr1 | 7.43E-07 | 0.334729591 | 0.379 | 0.191 | 0.016873231 | late aNSCs |
| Fndc3a | Fndc3a | 7.51E-07 | 0.359841737 | 0.435 | 0.233 | 0.017049721 | late aNSCs |
| Rubcn | Rubcn | 7.56E-07 | 0.33501484 | 0.267 | 0.119 | 0.01717221 | late aNSCs |
| Phactr11 | Phactr1 | 7.72E-07 | 0.389265448 | 0.944 | 0.871 | 0.017531329 | late aNSCs |
| Mpzl1 | Mpzl1 | 7.76E-07 | 0.327981345 | 0.335 | 0.162 | 0.0176364 | late aNSCs |
| Ubtd2 | Ubtd2 | 7.86E-07 | 0.350895894 | 0.255 | 0.114 | 0.017847769 | late aNSCs |
| Gsk3b1 | Gsk3b | 7.89E-07 | 0.367121702 | 0.845 | 0.63 | 0.017918566 | late aNSCs |
| 7-Mar | 7-Mar | 7.91E-07 | 0.40404994 | 0.497 | 0.288 | 0.017973462 | late aNSCs |
| Timm23 | Timm23 | 7.93E-07 | 0.342529814 | 0.255 | 0.113 | 0.018010894 | late aNSCs |
| Arl15 | Arl15 | 7.99E-07 | 0.448064996 | 0.627 | 0.407 | 0.018155794 | late aNSCs |
| Abl1 | Abl1 | 8.05E-07 | 0.387589333 | 0.366 | 0.191 | 0.018273052 | late aNSCs |
| Wsb1 | Wsb1 | 8.13E-07 | 0.425417739 | 0.472 | 0.265 | 0.018465599 | late aNSCs |
| Usp28 | Usp28 | 8.26E-07 | 0.288666033 | 0.286 | 0.13 | 0.018763225 | late aNSCs |
| Mtcl1 | Mtcl1 | 8.28E-07 | 0.259526976 | 0.36 | 0.176 | 0.018816045 | late aNSCs |
| Tial1 | Tial1 | 8.46E-07 | 0.407829925 | 0.528 | 0.313 | 0.019222488 | late aNSCs |
| Zfp6441 | Zfp644 | 8.59E-07 | 0.404420833 | 0.596 | 0.365 | 0.019503488 | late aNSCs |
| Mmp161 | Mmp16 | 8.66E-07 | 0.625910687 | 0.547 | 0.345 | 0.019670415 | late aNSCs |
| Gm437131 | Gm43713 | 9.20E-07 | 0.382126279 | 0.447 | 0.238 | 0.020897602 | late aNSCs |
| Zfp827 | Zfp827 | 9.28E-07 | 0.430742699 | 0.484 | 0.288 | 0.021079681 | late aNSCs |
| Prdx2 | Prdx2 | 9.52E-07 | 0.339281669 | 0.286 | 0.133 | 0.021625768 | late aNSCs |
| Dcc2 | Dcc | 1.01E-06 | 0.974306255 | 0.764 | 0.621 | 0.022987051 | late aNSCs |
| Edil31 | Edil3 | 1.02E-06 | 0.316450047 | 0.472 | 0.262 | 0.023169301 | late aNSCs |
| Hnrnpa2b11 | Hnrnpa2b1 | 1.03E-06 | 0.417560241 | 0.776 | 0.605 | 0.023358396 | late aNSCs |
| Fmr1 | Fmr1 | 1.04E-06 | 0.372110468 | 0.354 | 0.179 | 0.023686274 | late aNSCs |
| Zfr | Zfr | 1.05E-06 | 0.358117754 | 0.733 | 0.521 | 0.023808142 | late aNSCs |
| Nudt21 | Nudt21 | 1.07E-06 | 0.287493691 | 0.28 | 0.126 | 0.02431035 | late aNSCs |
| Sf1 | Sf1 | 1.10E-06 | 0.336441227 | 0.366 | 0.187 | 0.024895153 | late aNSCs |
| Gak | Gak | 1.11E-06 | 0.319590158 | 0.323 | 0.155 | 0.025318574 | late aNSCs |
| Glyr1 | Glyr1 | 1.12E-06 | 0.332308764 | 0.385 | 0.202 | 0.025372178 | late aNSCs |
| Serbp1 | Serbp1 | 1.19E-06 | 0.362217416 | 0.435 | 0.236 | 0.027109656 | late aNSCs |
| Cask1 | Cask | 1.19E-06 | 0.409165423 | 0.683 | 0.43 | 0.027124651 | late aNSCs |
| Ncald | Ncald | 1.20E-06 | 0.408285659 | 0.261 | 0.12 | 0.027175777 | late aNSCs |
| Synrg | Synrg | 1.25E-06 | 0.36734878 | 0.422 | 0.23 | 0.028368286 | late aNSCs |
| Dzip1 | Dzip1 | 1.26E-06 | 0.398413565 | 0.273 | 0.131 | 0.028516047 | late aNSCs |
| Lrrn1 | Lrrn1 | 1.26E-06 | 0.309410383 | 0.267 | 0.123 | 0.028529784 | late aNSCs |
| D430041D05Rik1 | D430041D05Rik | 1.29E-06 | 0.450851228 | 0.379 | 0.204 | 0.029403967 | late aNSCs |
| Arhgef21 | Arhgef2 | 1.37E-06 | 0.298918242 | 0.311 | 0.147 | 0.031147155 | late aNSCs |
| Atr | Atr | 1.38E-06 | 0.459029127 | 0.373 | 0.206 | 0.031327285 | late aNSCs |
| Depdc5 | Depdc5 | 1.39E-06 | 0.364154629 | 0.516 | 0.299 | 0.031645936 | late aNSCs |
| Adam221 | Adam22 | 1.42E-06 | 0.372545875 | 0.565 | 0.336 | 0.032221396 | late aNSCs |
| Gmcl1 | Gmcl1 | 1.44E-06 | 0.334512459 | 0.323 | 0.158 | 0.03265959 | late aNSCs |
| Zfp397 | Zfp397 | 1.47E-06 | 0.273348817 | 0.304 | 0.145 | 0.033484607 | late aNSCs |
| Mtdh | Mtdh | 1.50E-06 | 0.385550546 | 0.665 | 0.417 | 0.034097851 | late aNSCs |
| Uba2 | Uba2 | 1.56E-06 | 0.314894966 | 0.273 | 0.127 | 0.035377922 | late aNSCs |
| Nucks1 | Nucks1 | 1.58E-06 | 0.335372063 | 0.348 | 0.178 | 0.035927645 | late aNSCs |
| Smc3 | Smc3 | 1.59E-06 | 0.309639651 | 0.41 | 0.215 | 0.036085227 | late aNSCs |
| Pip5k1a | Pip5k1a | 1.60E-06 | 0.36087572 | 0.422 | 0.23 | 0.036427354 | late aNSCs |
| Eif4enif1 | Eif4enif1 | 1.65E-06 | 0.333779692 | 0.273 | 0.128 | 0.037405799 | late aNSCs |
| Tsc22d11 | Tsc22d1 | 1.67E-06 | 0.418582638 | 0.646 | 0.417 | 0.037973483 | late aNSCs |
| Ywhae | Ywhae | 1.69E-06 | 0.374716149 | 0.702 | 0.487 | 0.038482126 | late aNSCs |
| Stk31 | Stk3 | 1.70E-06 | 0.409727344 | 0.503 | 0.3 | 0.038712064 | late aNSCs |
| Pcbp2 | Pcbp2 | 1.84E-06 | 0.413485312 | 0.609 | 0.372 | 0.041828553 | late aNSCs |
| Cul1 | Cul1 | 1.84E-06 | 0.422020396 | 0.54 | 0.327 | 0.041852568 | late aNSCs |
| Spats21 | Spats2 | 1.85E-06 | 0.458941215 | 0.323 | 0.165 | 0.041968162 | late aNSCs |
| Cnot21 | Cnot2 | 1.85E-06 | 0.428608071 | 0.559 | 0.349 | 0.042008801 | late aNSCs |
| Pex14 | Pex14 | 1.95E-06 | 0.354380821 | 0.335 | 0.169 | 0.04426197 | late aNSCs |
| Fam193b | Fam193b | 1.95E-06 | 0.296814074 | 0.373 | 0.193 | 0.044398544 | late aNSCs |
| Ncl | Ncl | 2.08E-06 | 0.341979345 | 0.366 | 0.193 | 0.047243814 | late aNSCs |
| Eif4h | Eif4h | 2.12E-06 | 0.332180754 | 0.385 | 0.199 | 0.048262943 | late aNSCs |
| Eftud2 | Eftud2 | 2.14E-06 | 0.331839168 | 0.261 | 0.12 | 0.048545968 | late aNSCs |
| Arhgap35 | Arhgap35 | 2.17E-06 | 0.388357702 | 0.59 | 0.365 | 0.049262713 | late aNSCs |
| Gm16599 | Gm16599 | 2.19E-06 | 0.43192445 | 0.398 | 0.223 | 0.049772921 | late aNSCs |
| 5330434G04Rik2 | 5330434G04Rik | 2.23E-06 | 0.291533656 | 0.366 | 0.187 | 0.050676914 | late aNSCs |
| Rbmx1 | Rbmx | 2.24E-06 | 0.375159592 | 0.385 | 0.207 | 0.050799129 | late aNSCs |
| Xkr41 | Xkr4 | 2.26E-06 | 0.413144022 | 0.528 | 0.334 | 0.051387834 | late aNSCs |
| Rptor | Rptor | 2.39E-06 | 0.387789596 | 0.553 | 0.344 | 0.054202641 | late aNSCs |
| Uimc1 | Uimc1 | 2.41E-06 | 0.37888258 | 0.342 | 0.182 | 0.054646659 | late aNSCs |
| Fam222b | Fam222b | 2.53E-06 | 0.477969421 | 0.46 | 0.275 | 0.057475288 | late aNSCs |
| Uggt2 | Uggt2 | 2.53E-06 | 0.382689837 | 0.348 | 0.175 | 0.05749899 | late aNSCs |
| Nup93 | Nup93 | 2.62E-06 | 0.351197371 | 0.286 | 0.14 | 0.059517629 | late aNSCs |
| Cnep1r1 | Cnep1r1 | 2.65E-06 | 0.316927884 | 0.273 | 0.128 | 0.060181186 | late aNSCs |
| Sil1 | Sil1 | 2.67E-06 | 0.396569191 | 0.373 | 0.2 | 0.060674496 | late aNSCs |
| Ndufaf2 | Ndufaf2 | 2.87E-06 | 0.30972594 | 0.267 | 0.123 | 0.065282099 | late aNSCs |
| Ikbkb | Ikbkb | 2.87E-06 | 0.334796814 | 0.255 | 0.118 | 0.065294099 | late aNSCs |
| Atf7ip | Atf7ip | 2.94E-06 | 0.478977651 | 0.559 | 0.369 | 0.06683544 | late aNSCs |
| Nudcd3 | Nudcd3 | 3.02E-06 | 0.328420038 | 0.497 | 0.277 | 0.068653774 | late aNSCs |
| Agtpbp1 | Agtpbp1 | 3.04E-06 | 0.338854341 | 0.354 | 0.186 | 0.06897078 | late aNSCs |
| Kif13b | Kif13b | 3.09E-06 | 0.350924584 | 0.41 | 0.222 | 0.070084454 | late aNSCs |
| Rbm28 | Rbm28 | 3.10E-06 | 0.295927758 | 0.354 | 0.181 | 0.07029849 | late aNSCs |
| Map1b1 | Map1b | 3.26E-06 | 0.384646476 | 0.671 | 0.444 | 0.074054371 | late aNSCs |
| Atat1 | Atat1 | 3.26E-06 | 0.292187634 | 0.286 | 0.137 | 0.074132972 | late aNSCs |
| Prkd3 | Prkd3 | 3.35E-06 | 0.286846997 | 0.304 | 0.148 | 0.076196197 | late aNSCs |
| Hnrnpa3 | Hnrnpa3 | 3.49E-06 | 0.407119305 | 0.453 | 0.262 | 0.079262248 | late aNSCs |
| Taf3 | Taf3 | 3.50E-06 | 0.330633229 | 0.391 | 0.21 | 0.079596548 | late aNSCs |
| Pkia1 | Pkia | 3.53E-06 | 0.408842083 | 0.472 | 0.276 | 0.08018783 | late aNSCs |
| Stau1 | Stau1 | 3.60E-06 | 0.362169742 | 0.292 | 0.142 | 0.081779601 | late aNSCs |
| Fryl | Fryl | 3.62E-06 | 0.413900531 | 0.571 | 0.359 | 0.082200797 | late aNSCs |
| Naa16 | Naa16 | 3.79E-06 | 0.40572598 | 0.342 | 0.18 | 0.08601016 | late aNSCs |
| Hipk3 | Hipk3 | 3.84E-06 | 0.286898377 | 0.304 | 0.15 | 0.087245731 | late aNSCs |
| Cnot6l1 | Cnot6l | 3.88E-06 | 0.43386906 | 0.391 | 0.221 | 0.088129855 | late aNSCs |
| Simc1 | Simc1 | 3.92E-06 | 0.451713314 | 0.255 | 0.124 | 0.08903353 | late aNSCs |
| Ppig | Ppig | 3.96E-06 | 0.410197396 | 0.422 | 0.237 | 0.089998267 | late aNSCs |
| Supt20 | Supt20 | 4.16E-06 | 0.383922469 | 0.36 | 0.194 | 0.094383592 | late aNSCs |
| Phf12 | Phf12 | 4.33E-06 | 0.322375875 | 0.404 | 0.217 | 0.098390775 | late aNSCs |
| Marcks1 | Marcks | 4.37E-06 | 0.32188251 | 0.441 | 0.236 | 0.09921797 | late aNSCs |
| 4933434E20Rik | 4933434E20Rik | 4.38E-06 | 0.321523648 | 0.354 | 0.186 | 0.099471067 | late aNSCs |
| Rc3h2 | Rc3h2 | 4.39E-06 | 0.315984186 | 0.484 | 0.278 | 0.099662277 | late aNSCs |
| Atp13a3 | Atp13a3 | 4.42E-06 | 0.312270529 | 0.311 | 0.155 | 0.10037278 | late aNSCs |
| Trim351 | Trim35 | 4.93E-06 | 0.350757547 | 0.348 | 0.183 | 0.111918615 | late aNSCs |
| Bdp1 | Bdp1 | 5.00E-06 | 0.277245006 | 0.391 | 0.207 | 0.113557823 | late aNSCs |
| Rsrc2 | Rsrc2 | 5.16E-06 | 0.359928581 | 0.534 | 0.33 | 0.117244764 | late aNSCs |
| Ylpm1 | Ylpm1 | 5.19E-06 | 0.339427414 | 0.652 | 0.421 | 0.117914347 | late aNSCs |
| Xrn2 | Xrn2 | 5.20E-06 | 0.39862652 | 0.429 | 0.245 | 0.117995378 | late aNSCs |
| Cdk171 | Cdk17 | 5.32E-06 | 0.487824946 | 0.646 | 0.464 | 0.120912042 | late aNSCs |
| Thrap3 | Thrap3 | 5.34E-06 | 0.35664559 | 0.447 | 0.25 | 0.121247168 | late aNSCs |
| Lrp6 | Lrp6 | 5.38E-06 | 0.348773422 | 0.509 | 0.301 | 0.122182092 | late aNSCs |
| Fip1l1 | Fip1l1 | 5.57E-06 | 0.265500057 | 0.385 | 0.202 | 0.126467317 | late aNSCs |
| Hspa4 | Hspa4 | 5.59E-06 | 0.376768274 | 0.354 | 0.187 | 0.12692102 | late aNSCs |
| Rpa1 | Rpa1 | 5.77E-06 | 0.326458877 | 0.28 | 0.138 | 0.130975542 | late aNSCs |
| Tubb51 | Tubb5 | 5.89E-06 | 0.374046543 | 0.379 | 0.199 | 0.13377331 | late aNSCs |
| Ivns1abp | Ivns1abp | 5.93E-06 | 0.319798944 | 0.348 | 0.182 | 0.134591677 | late aNSCs |
| Efnb21 | Efnb2 | 5.93E-06 | 0.353728548 | 0.366 | 0.197 | 0.134682469 | late aNSCs |
| Spop | Spop | 5.98E-06 | 0.378195825 | 0.571 | 0.361 | 0.135869824 | late aNSCs |
| Dhx30 | Dhx30 | 6.14E-06 | 0.34673042 | 0.478 | 0.283 | 0.13942951 | late aNSCs |
| Agap3 | Agap3 | 6.36E-06 | 0.268070347 | 0.304 | 0.15 | 0.144428124 | late aNSCs |
| Smarcc2 | Smarcc2 | 6.43E-06 | 0.335158433 | 0.565 | 0.361 | 0.146040751 | late aNSCs |
| Chn11 | Chn1 | 6.57E-06 | 0.358752302 | 0.634 | 0.419 | 0.149206314 | late aNSCs |
| Tor1aip2 | Tor1aip2 | 6.58E-06 | 0.2865636 | 0.273 | 0.132 | 0.149520735 | late aNSCs |
| Ube2r21 | Ube2r2 | 6.72E-06 | 0.375819641 | 0.516 | 0.312 | 0.152663144 | late aNSCs |
| Magi31 | Magi3 | 6.81E-06 | 0.317389663 | 0.553 | 0.352 | 0.154599181 | late aNSCs |
| Hnrnpll | Hnrnpll | 6.82E-06 | 0.354640165 | 0.379 | 0.205 | 0.154865239 | late aNSCs |
| Faf2 | Faf2 | 6.86E-06 | 0.306411383 | 0.323 | 0.162 | 0.155740396 | late aNSCs |
| Thoc1 | Thoc1 | 6.88E-06 | 0.300957245 | 0.298 | 0.149 | 0.15635058 | late aNSCs |
| Rspry1 | Rspry1 | 7.01E-06 | 0.337175649 | 0.422 | 0.24 | 0.159182726 | late aNSCs |
| Pot1b | Pot1b | 7.12E-06 | 0.346705968 | 0.267 | 0.131 | 0.161765926 | late aNSCs |
| Ttc7b | Ttc7b | 7.15E-06 | 0.346078788 | 0.46 | 0.263 | 0.162425465 | late aNSCs |
| Peli1 | Peli1 | 7.44E-06 | 0.421311814 | 0.509 | 0.318 | 0.168998886 | late aNSCs |
| Phlpp2 | Phlpp2 | 8.36E-06 | 0.306307536 | 0.28 | 0.139 | 0.189781243 | late aNSCs |
| Srsf2 | Srsf2 | 8.37E-06 | 0.364295359 | 0.404 | 0.226 | 0.190189108 | late aNSCs |
| Zfp407 | Zfp407 | 8.41E-06 | 0.406567134 | 0.571 | 0.379 | 0.190992518 | late aNSCs |
| Sez61 | Sez6 | 8.50E-06 | 0.307567991 | 0.484 | 0.284 | 0.193062193 | late aNSCs |
| Rnf169 | Rnf169 | 8.66E-06 | 0.353771543 | 0.509 | 0.313 | 0.196734873 | late aNSCs |
| Numa1 | Numa1 | 8.81E-06 | 0.302508116 | 0.422 | 0.236 | 0.200017382 | late aNSCs |
| Chuk | Chuk | 8.92E-06 | 0.384523491 | 0.298 | 0.154 | 0.202647639 | late aNSCs |
| Acbd6 | Acbd6 | 9.06E-06 | 0.289536581 | 0.416 | 0.229 | 0.20582546 | late aNSCs |
| Cldn34c1 | Cldn34c1 | 9.15E-06 | 0.332800944 | 0.267 | 0.132 | 0.207856102 | late aNSCs |
| Ino80 | Ino80 | 9.16E-06 | 0.250865531 | 0.46 | 0.26 | 0.208022924 | late aNSCs |
| Atrnl11 | Atrnl1 | 9.45E-06 | 0.436906146 | 0.491 | 0.314 | 0.214634747 | late aNSCs |
| Tmem571 | Tmem57 | 9.57E-06 | 0.373813473 | 0.447 | 0.266 | 0.217442153 | late aNSCs |
| Ap4e1 | Ap4e1 | 9.85E-06 | 0.337668262 | 0.255 | 0.123 | 0.223689609 | late aNSCs |
| Ppm1l1 | Ppm1l | 1.00E-05 | 0.27302568 | 0.404 | 0.228 | 0.228114475 | late aNSCs |
| Ppp1cc | Ppp1cc | 1.01E-05 | 0.256383743 | 0.273 | 0.133 | 0.229433916 | late aNSCs |
| Zc3h15 | Zc3h15 | 1.02E-05 | 0.330562976 | 0.323 | 0.169 | 0.231093841 | late aNSCs |
| Dync1i21 | Dync1i2 | 1.02E-05 | 0.351590144 | 0.547 | 0.336 | 0.231466363 | late aNSCs |
| Taf1 | Taf1 | 1.03E-05 | 0.267393552 | 0.366 | 0.194 | 0.233108766 | late aNSCs |
| Lrp12 | Lrp12 | 1.03E-05 | 0.356674956 | 0.261 | 0.129 | 0.233868831 | late aNSCs |
| Brwd1 | Brwd1 | 1.03E-05 | 0.400043525 | 0.584 | 0.389 | 0.234554517 | late aNSCs |
| Cep68 | Cep68 | 1.04E-05 | 0.321730536 | 0.292 | 0.145 | 0.235817646 | late aNSCs |
| Abhd2 | Abhd2 | 1.06E-05 | 0.357954344 | 0.329 | 0.174 | 0.239955301 | late aNSCs |
| Fzd31 | Fzd3 | 1.07E-05 | 0.265856165 | 0.435 | 0.243 | 0.243475854 | late aNSCs |
| Gm44686 | Gm44686 | 1.12E-05 | 0.275533095 | 0.348 | 0.183 | 0.254549895 | late aNSCs |
| Grm1 | Grm1 | 1.13E-05 | 0.798105686 | 0.329 | 0.18 | 0.257329283 | late aNSCs |
| C2cd3 | C2cd3 | 1.18E-05 | 0.371855259 | 0.385 | 0.217 | 0.267198877 | late aNSCs |
| Mkl11 | Mkl1 | 1.21E-05 | 0.346367366 | 0.379 | 0.206 | 0.275746193 | late aNSCs |
| Thada | Thada | 1.24E-05 | 0.352431768 | 0.422 | 0.242 | 0.280663571 | late aNSCs |
| Tbck | Tbck | 1.24E-05 | 0.349323623 | 0.429 | 0.246 | 0.28198727 | late aNSCs |
| Flrt21 | Flrt2 | 1.25E-05 | 0.432235427 | 0.435 | 0.27 | 0.282876425 | late aNSCs |
| Cwc27 | Cwc27 | 1.30E-05 | 0.329310304 | 0.441 | 0.257 | 0.29589268 | late aNSCs |
| Cnot10 | Cnot10 | 1.32E-05 | 0.297120456 | 0.311 | 0.161 | 0.299201208 | late aNSCs |
| Ccdc88a1 | Ccdc88a | 1.34E-05 | 0.320901077 | 0.87 | 0.786 | 0.305291889 | late aNSCs |
| Nxpe41 | Nxpe4 | 1.41E-05 | 0.349369171 | 0.416 | 0.241 | 0.320442287 | late aNSCs |
| Dnaja1 | Dnaja1 | 1.50E-05 | 0.298502058 | 0.261 | 0.13 | 0.34043874 | late aNSCs |
| Braf | Braf | 1.53E-05 | 0.351995974 | 0.677 | 0.472 | 0.346975108 | late aNSCs |
| Rasa1 | Rasa1 | 1.57E-05 | 0.263763657 | 0.509 | 0.299 | 0.356687414 | late aNSCs |
| Ddx3x | Ddx3x | 1.58E-05 | 0.40010601 | 0.366 | 0.211 | 0.357897973 | late aNSCs |
| Morc3 | Morc3 | 1.59E-05 | 0.284181349 | 0.261 | 0.128 | 0.360706784 | late aNSCs |
| Iqgap11 | Iqgap1 | 1.65E-05 | 0.328620564 | 0.298 | 0.154 | 0.3736431 | late aNSCs |
| Tbk1 | Tbk1 | 1.66E-05 | 0.320829761 | 0.261 | 0.129 | 0.377639759 | late aNSCs |
| Stag21 | Stag2 | 1.68E-05 | 0.353638672 | 0.547 | 0.348 | 0.38125962 | late aNSCs |
| Ube2d11 | Ube2d1 | 1.76E-05 | 0.291150502 | 0.28 | 0.141 | 0.400392022 | late aNSCs |
| Ep300 | Ep300 | 1.80E-05 | 0.375368843 | 0.472 | 0.283 | 0.40871768 | late aNSCs |
| Mthfd2l | Mthfd2l | 1.86E-05 | 0.252064037 | 0.261 | 0.127 | 0.422331601 | late aNSCs |
| Zfp2661 | Zfp266 | 1.87E-05 | 0.253395253 | 0.46 | 0.265 | 0.423624847 | late aNSCs |
| Phf20l1 | Phf20l1 | 1.90E-05 | 0.381053559 | 0.627 | 0.444 | 0.432609822 | late aNSCs |
| Raph11 | Raph1 | 2.13E-05 | 0.266830214 | 0.385 | 0.216 | 0.483529097 | late aNSCs |
| Dip2c1 | Dip2c | 2.13E-05 | 0.330915804 | 0.826 | 0.652 | 0.484493775 | late aNSCs |
| Nfic | Nfic | 2.14E-05 | 0.321345187 | 0.267 | 0.135 | 0.486604151 | late aNSCs |
| Csnk2a11 | Csnk2a1 | 2.15E-05 | 0.287624318 | 0.373 | 0.204 | 0.488526699 | late aNSCs |
| Bcl91 | Bcl9 | 2.17E-05 | 0.30393468 | 0.516 | 0.308 | 0.493045269 | late aNSCs |
| Arl6ip1 | Arl6ip1 | 2.18E-05 | 0.425600289 | 0.298 | 0.16 | 0.494515131 | late aNSCs |
| Hnrnpk | Hnrnpk | 2.20E-05 | 0.34336098 | 0.466 | 0.27 | 0.499788672 | late aNSCs |
| Usp291 | Usp29 | 2.23E-05 | 0.269268882 | 0.348 | 0.191 | 0.505652327 | late aNSCs |
| Foxj3 | Foxj3 | 2.23E-05 | 0.278099912 | 0.391 | 0.22 | 0.507063892 | late aNSCs |
| Slc44a2 | Slc44a2 | 2.27E-05 | 0.365879647 | 0.255 | 0.127 | 0.516069793 | late aNSCs |
| Ncoa7 | Ncoa7 | 2.29E-05 | 0.351675168 | 0.366 | 0.209 | 0.520990743 | late aNSCs |
| Gucy1a21 | Gucy1a2 | 2.30E-05 | 0.320673733 | 0.509 | 0.322 | 0.521802017 | late aNSCs |
| Map3k7 | Map3k7 | 2.32E-05 | 0.271572611 | 0.329 | 0.175 | 0.525978111 | late aNSCs |
| Galnt11 | Galnt1 | 2.41E-05 | 0.333586524 | 0.497 | 0.308 | 0.547947326 | late aNSCs |
| Rhbdl3 | Rhbdl3 | 2.45E-05 | 0.433167427 | 0.255 | 0.131 | 0.555914532 | late aNSCs |
| Mapre1 | Mapre1 | 2.46E-05 | 0.262914203 | 0.261 | 0.13 | 0.558503221 | late aNSCs |
| Atf21 | Atf2 | 2.59E-05 | 0.361068665 | 0.571 | 0.386 | 0.58817748 | late aNSCs |
| Ubr1 | Ubr1 | 2.62E-05 | 0.2681042 | 0.509 | 0.304 | 0.594786001 | late aNSCs |
| Gls1 | Gls | 2.75E-05 | 0.395400489 | 0.609 | 0.399 | 0.625299703 | late aNSCs |
| Terf2 | Terf2 | 2.76E-05 | 0.351058478 | 0.28 | 0.143 | 0.626483835 | late aNSCs |
| Hp1bp3 | Hp1bp3 | 2.78E-05 | 0.282884277 | 0.373 | 0.211 | 0.632290411 | late aNSCs |
| Trpm7 | Trpm7 | 2.80E-05 | 0.384159079 | 0.602 | 0.389 | 0.635237082 | late aNSCs |
| Set | Set | 2.80E-05 | 0.288106136 | 0.273 | 0.139 | 0.636441281 | late aNSCs |
| Asap12 | Asap1 | 2.85E-05 | 0.30920317 | 0.739 | 0.513 | 0.647366768 | late aNSCs |
| D5Ertd579e | D5Ertd579e | 2.89E-05 | 0.389184481 | 0.478 | 0.302 | 0.655565931 | late aNSCs |
| Ubp1 | Ubp1 | 2.89E-05 | 0.294312933 | 0.317 | 0.169 | 0.656648961 | late aNSCs |
| Map4k3 | Map4k3 | 2.93E-05 | 0.359817672 | 0.472 | 0.285 | 0.665786236 | late aNSCs |
| Cacna2d12 | Cacna2d1 | 2.93E-05 | 0.394970768 | 0.584 | 0.38 | 0.666549876 | late aNSCs |
| Rnf115 | Rnf115 | 2.94E-05 | 0.269375468 | 0.292 | 0.151 | 0.668178225 | late aNSCs |
| Psma3 | Psma3 | 3.00E-05 | 0.258935193 | 0.366 | 0.203 | 0.6805898 | late aNSCs |
| Camkk2 | Camkk2 | 3.13E-05 | 0.318476799 | 0.261 | 0.131 | 0.711015218 | late aNSCs |
| Trp53bp11 | Trp53bp1 | 3.14E-05 | 0.319187203 | 0.416 | 0.243 | 0.714307503 | late aNSCs |
| Large11 | Large1 | 3.16E-05 | 0.278866327 | 0.752 | 0.56 | 0.717783844 | late aNSCs |
| Pank2 | Pank2 | 3.20E-05 | 0.332207312 | 0.391 | 0.226 | 0.726174821 | late aNSCs |
| Prr14 | Prr14 | 3.37E-05 | 0.264566418 | 0.304 | 0.162 | 0.76473259 | late aNSCs |
| Ptpn12 | Ptpn12 | 3.40E-05 | 0.317950769 | 0.565 | 0.358 | 0.772213447 | late aNSCs |
| Tdrd3 | Tdrd3 | 3.51E-05 | 0.355509353 | 0.46 | 0.276 | 0.797476039 | late aNSCs |
| D17Wsu92e | D17Wsu92e | 3.54E-05 | 0.31430022 | 0.304 | 0.166 | 0.804774763 | late aNSCs |
| Wdfy31 | Wdfy3 | 3.68E-05 | 0.292725064 | 0.683 | 0.475 | 0.835866247 | late aNSCs |
| Myo9a1 | Myo9a | 3.77E-05 | 0.341524421 | 0.714 | 0.51 | 0.855654409 | late aNSCs |
| Eps15l1 | Eps15l1 | 3.82E-05 | 0.295033376 | 0.509 | 0.315 | 0.866554481 | late aNSCs |
| Snx6 | Snx6 | 3.85E-05 | 0.291580293 | 0.304 | 0.163 | 0.874520707 | late aNSCs |
| Selenoi | Selenoi | 3.86E-05 | 0.31428143 | 0.255 | 0.131 | 0.876880542 | late aNSCs |
| Gm26561 | Gm26561 | 4.02E-05 | 0.314500957 | 0.311 | 0.169 | 0.912730736 | late aNSCs |
| Ankib1 | Ankib1 | 4.08E-05 | 0.316982582 | 0.441 | 0.265 | 0.92655818 | late aNSCs |
| Fam13b | Fam13b | 4.20E-05 | 0.313928285 | 0.453 | 0.28 | 0.95311281 | late aNSCs |
| Slc30a9 | Slc30a9 | 4.25E-05 | 0.259065205 | 0.398 | 0.227 | 0.964922053 | late aNSCs |
| Orc5 | Orc5 | 4.25E-05 | 0.31063589 | 0.311 | 0.168 | 0.965014941 | late aNSCs |
| Sumo2 | Sumo2 | 4.30E-05 | 0.31203923 | 0.391 | 0.226 | 0.976950207 | late aNSCs |
| 2810403A07Rik | 2810403A07Rik | 4.31E-05 | 0.354926207 | 0.429 | 0.256 | 0.978759432 | late aNSCs |
| Fam168b | Fam168b | 4.32E-05 | 0.269262675 | 0.422 | 0.246 | 0.981320122 | late aNSCs |
| Fbxo111 | Fbxo11 | 4.45E-05 | 0.293311756 | 0.627 | 0.427 | 1 | late aNSCs |
| Faf1 | Faf1 | 4.46E-05 | 0.329248463 | 0.652 | 0.462 | 1 | late aNSCs |
| Arid4b1 | Arid4b | 4.54E-05 | 0.325081783 | 0.646 | 0.433 | 1 | late aNSCs |
| Cdh4 | Cdh4 | 4.69E-05 | 0.556906847 | 0.273 | 0.153 | 1 | late aNSCs |
| Wapl | Wapl | 4.71E-05 | 0.283846541 | 0.54 | 0.344 | 1 | late aNSCs |
| Atp6v1h | Atp6v1h | 4.84E-05 | 0.324777895 | 0.435 | 0.259 | 1 | late aNSCs |
| Kmt2a | Kmt2a | 4.87E-05 | 0.312037961 | 0.658 | 0.46 | 1 | late aNSCs |
| Dcp1b | Dcp1b | 5.05E-05 | 0.384703197 | 0.261 | 0.137 | 1 | late aNSCs |
| Abcb7 | Abcb7 | 5.06E-05 | 0.334230832 | 0.335 | 0.19 | 1 | late aNSCs |
| Usp14 | Usp14 | 5.16E-05 | 0.289350939 | 0.323 | 0.176 | 1 | late aNSCs |
| Tlk1 | Tlk1 | 5.20E-05 | 0.280713688 | 0.466 | 0.282 | 1 | late aNSCs |
| Lrch2 | Lrch2 | 5.28E-05 | 0.258604329 | 0.292 | 0.154 | 1 | late aNSCs |
| Btbd91 | Btbd9 | 5.34E-05 | 0.291251419 | 0.683 | 0.48 | 1 | late aNSCs |
| Spen | Spen | 5.51E-05 | 0.288118606 | 0.453 | 0.267 | 1 | late aNSCs |
| Med13 | Med13 | 5.55E-05 | 0.31757076 | 0.571 | 0.379 | 1 | late aNSCs |
| Top1 | Top1 | 6.05E-05 | 0.459184073 | 0.64 | 0.474 | 1 | late aNSCs |
| Phf141 | Phf14 | 6.12E-05 | 0.375972816 | 0.714 | 0.519 | 1 | late aNSCs |
| Basp11 | Basp1 | 6.15E-05 | 0.321254694 | 0.509 | 0.32 | 1 | late aNSCs |
| Scai1 | Scai | 6.23E-05 | 0.335357977 | 0.484 | 0.304 | 1 | late aNSCs |
| Zfp326 | Zfp326 | 6.25E-05 | 0.339386907 | 0.348 | 0.199 | 1 | late aNSCs |
| Fam110b1 | Fam110b | 6.43E-05 | 0.256471347 | 0.497 | 0.318 | 1 | late aNSCs |
| Ccnl1 | Ccnl1 | 6.47E-05 | 0.273517429 | 0.391 | 0.227 | 1 | late aNSCs |
| Ptbp3 | Ptbp3 | 6.73E-05 | 0.254138171 | 0.273 | 0.142 | 1 | late aNSCs |
| Ddr1 | Ddr1 | 6.74E-05 | 0.326193989 | 0.323 | 0.175 | 1 | late aNSCs |
| Ctnna31 | Ctnna3 | 6.83E-05 | 0.558947741 | 0.28 | 0.164 | 1 | late aNSCs |
| Pign | Pign | 6.86E-05 | 0.27840738 | 0.398 | 0.233 | 1 | late aNSCs |
| Kif5b | Kif5b | 7.08E-05 | 0.318324765 | 0.491 | 0.306 | 1 | late aNSCs |
| Ythdf3 | Ythdf3 | 7.38E-05 | 0.316645647 | 0.497 | 0.309 | 1 | late aNSCs |
| Plcl11 | Plcl1 | 7.62E-05 | 0.492655776 | 0.702 | 0.565 | 1 | late aNSCs |
| Enox2 | Enox2 | 7.74E-05 | 0.371268414 | 0.329 | 0.194 | 1 | late aNSCs |
| Zc3h7b | Zc3h7b | 7.80E-05 | 0.29312017 | 0.304 | 0.168 | 1 | late aNSCs |
| Psmb2 | Psmb2 | 8.02E-05 | 0.358606044 | 0.323 | 0.186 | 1 | late aNSCs |
| Zfp512 | Zfp512 | 8.11E-05 | 0.264021951 | 0.292 | 0.156 | 1 | late aNSCs |
| Rnf214 | Rnf214 | 8.18E-05 | 0.301087841 | 0.348 | 0.199 | 1 | late aNSCs |
| 11-Sep | 11-Sep | 8.37E-05 | 0.37222314 | 0.379 | 0.227 | 1 | late aNSCs |
| Cyb5r4 | Cyb5r4 | 8.46E-05 | 0.265205554 | 0.255 | 0.132 | 1 | late aNSCs |
| Rfx71 | Rfx7 | 8.49E-05 | 0.300997599 | 0.671 | 0.46 | 1 | late aNSCs |
| Phrf1 | Phrf1 | 8.49E-05 | 0.316902536 | 0.267 | 0.144 | 1 | late aNSCs |
| Tex9 | Tex9 | 8.56E-05 | 0.337883831 | 0.255 | 0.135 | 1 | late aNSCs |
| Anapc1 | Anapc1 | 8.79E-05 | 0.289040319 | 0.323 | 0.182 | 1 | late aNSCs |
| Mapk8ip3 | Mapk8ip3 | 9.17E-05 | 0.293694573 | 0.366 | 0.213 | 1 | late aNSCs |
| Specc1l | Specc1l | 9.41E-05 | 0.290566877 | 0.46 | 0.28 | 1 | late aNSCs |
| Taok1 | Taok1 | 9.72E-05 | 0.281371271 | 0.646 | 0.437 | 1 | late aNSCs |
| Itch | Itch | 9.91E-05 | 0.367885944 | 0.615 | 0.456 | 1 | late aNSCs |
| Baz2b | Baz2b | 0.000103341 | 0.359692785 | 0.801 | 0.653 | 1 | late aNSCs |
| Rap1gds1 | Rap1gds1 | 0.000113319 | 0.250686834 | 0.466 | 0.29 | 1 | late aNSCs |
| Psme4 | Psme4 | 0.000115905 | 0.39800712 | 0.665 | 0.459 | 1 | late aNSCs |
| Arid1a1 | Arid1a | 0.000116223 | 0.360224154 | 0.634 | 0.448 | 1 | late aNSCs |
| Cnbp | Cnbp | 0.000116428 | 0.269554754 | 0.366 | 0.214 | 1 | late aNSCs |
| Gm21631 | Gm2163 | 0.000125445 | 0.325094786 | 0.522 | 0.346 | 1 | late aNSCs |
| Bptf | Bptf | 0.000129142 | 0.260869125 | 0.59 | 0.406 | 1 | late aNSCs |
| Brd4 | Brd4 | 0.000134922 | 0.356345256 | 0.559 | 0.379 | 1 | late aNSCs |
| Ncor1 | Ncor1 | 0.000136688 | 0.296896193 | 0.739 | 0.57 | 1 | late aNSCs |
| Clasp11 | Clasp1 | 0.000142495 | 0.296091606 | 0.714 | 0.52 | 1 | late aNSCs |
| H2afz | H2afz | 0.00014494 | 0.335050984 | 0.298 | 0.165 | 1 | late aNSCs |
| D630045J12Rik1 | D630045J12Rik | 0.00014785 | 0.269725728 | 0.261 | 0.139 | 1 | late aNSCs |
| Foxk2 | Foxk2 | 0.000148382 | 0.273747489 | 0.298 | 0.168 | 1 | late aNSCs |
| Dync1h1 | Dync1h1 | 0.00015629 | 0.255914051 | 0.472 | 0.294 | 1 | late aNSCs |
| Canx | Canx | 0.000157239 | 0.284124978 | 0.46 | 0.291 | 1 | late aNSCs |
| Srsf11 | Srsf11 | 0.000158202 | 0.302516783 | 0.534 | 0.352 | 1 | late aNSCs |
| Ubap1 | Ubap1 | 0.000158855 | 0.263080308 | 0.267 | 0.145 | 1 | late aNSCs |
| Luzp11 | Luzp1 | 0.000159795 | 0.345842789 | 0.422 | 0.273 | 1 | late aNSCs |
| Sp4 | Sp4 | 0.000163192 | 0.284078224 | 0.41 | 0.246 | 1 | late aNSCs |
| Spast1 | Spast | 0.000175376 | 0.251606844 | 0.366 | 0.214 | 1 | late aNSCs |
| 4732471J01Rik | 4732471J01Rik | 0.000176709 | 0.341227626 | 0.391 | 0.243 | 1 | late aNSCs |
| Clpb | Clpb | 0.000183968 | 0.290679879 | 0.267 | 0.146 | 1 | late aNSCs |
| Zfp438 | Zfp438 | 0.000184099 | 0.274053793 | 0.391 | 0.232 | 1 | late aNSCs |
| Eif3a | Eif3a | 0.000186965 | 0.307824786 | 0.335 | 0.2 | 1 | late aNSCs |
| Gm37494 | Gm37494 | 0.000190029 | 0.259468194 | 0.304 | 0.174 | 1 | late aNSCs |
| Gpr107 | Gpr107 | 0.000201633 | 0.250101704 | 0.28 | 0.155 | 1 | late aNSCs |
| Casd1 | Casd1 | 0.000204376 | 0.289521901 | 0.329 | 0.195 | 1 | late aNSCs |
| Trim44 | Trim44 | 0.000206481 | 0.285333058 | 0.478 | 0.307 | 1 | late aNSCs |
| Gria41 | Gria4 | 0.000211764 | 0.49810587 | 0.453 | 0.309 | 1 | late aNSCs |
| Ccdc66 | Ccdc66 | 0.0002119 | 0.273148756 | 0.286 | 0.159 | 1 | late aNSCs |
| Lmbr1 | Lmbr1 | 0.000218276 | 0.32508646 | 0.317 | 0.186 | 1 | late aNSCs |
| Gpatch81 | Gpatch8 | 0.000219394 | 0.266097445 | 0.807 | 0.623 | 1 | late aNSCs |
| Vps13a | Vps13a | 0.000221905 | 0.406051552 | 0.379 | 0.238 | 1 | late aNSCs |
| Kdm6a | Kdm6a | 0.000228157 | 0.311304759 | 0.416 | 0.27 | 1 | late aNSCs |
| Tmem175 | Tmem175 | 0.000229333 | 0.287141763 | 0.298 | 0.167 | 1 | late aNSCs |
| Csnk2a2 | Csnk2a2 | 0.000229351 | 0.265116478 | 0.267 | 0.147 | 1 | late aNSCs |
| Vps54 | Vps54 | 0.000233567 | 0.285849728 | 0.404 | 0.245 | 1 | late aNSCs |
| Gle1 | Gle1 | 0.000237999 | 0.286235376 | 0.267 | 0.143 | 1 | late aNSCs |
| Mbtd11 | Mbtd1 | 0.000240835 | 0.356598787 | 0.615 | 0.457 | 1 | late aNSCs |
| Eya3 | Eya3 | 0.000245071 | 0.276752162 | 0.348 | 0.209 | 1 | late aNSCs |
| Smg7 | Smg7 | 0.000245248 | 0.346716307 | 0.385 | 0.237 | 1 | late aNSCs |
| Galnt131 | Galnt13 | 0.000261335 | 0.37991421 | 0.466 | 0.312 | 1 | late aNSCs |
| Hipk1 | Hipk1 | 0.000263964 | 0.302776455 | 0.292 | 0.164 | 1 | late aNSCs |
| Kansl3 | Kansl3 | 0.000269112 | 0.256033713 | 0.286 | 0.161 | 1 | late aNSCs |
| Abhd17b | Abhd17b | 0.000271489 | 0.35757173 | 0.385 | 0.243 | 1 | late aNSCs |
| Nktr | Nktr | 0.000273774 | 0.26208936 | 0.615 | 0.425 | 1 | late aNSCs |
| Gm26733 | Gm26733 | 0.000276324 | 0.289846044 | 0.46 | 0.294 | 1 | late aNSCs |
| Snd1 | Snd1 | 0.000278699 | 0.263793615 | 0.429 | 0.269 | 1 | late aNSCs |
| Mtmr3 | Mtmr3 | 0.000285875 | 0.265067482 | 0.59 | 0.411 | 1 | late aNSCs |
| Nipbl | Nipbl | 0.000287093 | 0.346369716 | 0.745 | 0.593 | 1 | late aNSCs |
| Scfd21 | Scfd2 | 0.000292018 | 0.342983803 | 0.348 | 0.216 | 1 | late aNSCs |
| Smg1 | Smg1 | 0.000306563 | 0.254515013 | 0.522 | 0.352 | 1 | late aNSCs |
| Rab3c1 | Rab3c | 0.000308078 | 0.257648047 | 0.398 | 0.247 | 1 | late aNSCs |
| Ube2k | Ube2k | 0.000314345 | 0.307154873 | 0.559 | 0.393 | 1 | late aNSCs |
| Tlk2 | Tlk2 | 0.000320614 | 0.349377372 | 0.484 | 0.313 | 1 | late aNSCs |
| C2cd51 | C2cd5 | 0.000325106 | 0.303390428 | 0.528 | 0.358 | 1 | late aNSCs |
| Sppl31 | Sppl3 | 0.000339184 | 0.325046625 | 0.472 | 0.317 | 1 | late aNSCs |
| Sltm | Sltm | 0.000342878 | 0.289952308 | 0.59 | 0.433 | 1 | late aNSCs |
| Sf3b1 | Sf3b1 | 0.000353907 | 0.306530784 | 0.528 | 0.363 | 1 | late aNSCs |
| Ccnt2 | Ccnt2 | 0.00036716 | 0.287625436 | 0.46 | 0.295 | 1 | late aNSCs |
| 2810474O19Rik | 2810474O19Rik | 0.000367907 | 0.25797903 | 0.261 | 0.145 | 1 | late aNSCs |
| Arid5b | Arid5b | 0.00037517 | 0.438766496 | 0.286 | 0.167 | 1 | late aNSCs |
| Fto | Fto | 0.00038323 | 0.288797748 | 0.727 | 0.545 | 1 | late aNSCs |
| Dicer1 | Dicer1 | 0.000388293 | 0.297568552 | 0.329 | 0.199 | 1 | late aNSCs |
| Unc791 | Unc79 | 0.000397672 | 0.35857906 | 0.559 | 0.397 | 1 | late aNSCs |
| Rab11fip31 | Rab11fip3 | 0.000421543 | 0.263083 | 0.484 | 0.315 | 1 | late aNSCs |
| Thoc2 | Thoc2 | 0.000422766 | 0.33075287 | 0.553 | 0.386 | 1 | late aNSCs |
| Clip11 | Clip1 | 0.000429062 | 0.253598366 | 0.348 | 0.208 | 1 | late aNSCs |
| Klf131 | Klf13 | 0.000432455 | 0.296816504 | 0.298 | 0.175 | 1 | late aNSCs |
| Washc4 | Washc4 | 0.000449015 | 0.250698133 | 0.323 | 0.191 | 1 | late aNSCs |
| Stx16 | Stx16 | 0.000454552 | 0.257962658 | 0.466 | 0.305 | 1 | late aNSCs |
| Slc25a36 | Slc25a36 | 0.000471402 | 0.258198369 | 0.441 | 0.282 | 1 | late aNSCs |
| Hnrnpdl | Hnrnpdl | 0.00047422 | 0.274465345 | 0.46 | 0.302 | 1 | late aNSCs |
| Xiap | Xiap | 0.000493829 | 0.323892964 | 0.398 | 0.262 | 1 | late aNSCs |
| Sgce1 | Sgce | 0.000495414 | 0.272953852 | 0.441 | 0.286 | 1 | late aNSCs |
| Btbd1 | Btbd1 | 0.000499368 | 0.270632601 | 0.385 | 0.238 | 1 | late aNSCs |
| Mllt31 | Mllt3 | 0.000499669 | 0.280528473 | 0.571 | 0.431 | 1 | late aNSCs |
| Kdm2a | Kdm2a | 0.000510566 | 0.267820845 | 0.584 | 0.398 | 1 | late aNSCs |
| Zfp91 | Zfp91 | 0.000515005 | 0.262680596 | 0.329 | 0.198 | 1 | late aNSCs |
| Tbc1d5 | Tbc1d5 | 0.000526332 | 0.403257959 | 0.578 | 0.446 | 1 | late aNSCs |
| Ireb21 | Ireb2 | 0.000539238 | 0.295456263 | 0.348 | 0.213 | 1 | late aNSCs |
| Adgrl2 | Adgrl2 | 0.000543611 | 0.314548325 | 0.286 | 0.168 | 1 | late aNSCs |
| Chchd31 | Chchd3 | 0.000556655 | 0.294585777 | 0.615 | 0.428 | 1 | late aNSCs |
| Gm123941 | Gm12394 | 0.000556677 | 0.286597212 | 0.317 | 0.187 | 1 | late aNSCs |
| Adam101 | Adam10 | 0.000569572 | 0.31458295 | 0.404 | 0.259 | 1 | late aNSCs |
| Sorcs11 | Sorcs1 | 0.00057859 | 0.253304956 | 0.335 | 0.21 | 1 | late aNSCs |
| Mysm1 | Mysm1 | 0.000634314 | 0.261624346 | 0.379 | 0.241 | 1 | late aNSCs |
| Ptpn4 | Ptpn4 | 0.000645409 | 0.269834727 | 0.727 | 0.533 | 1 | late aNSCs |
| Safb2 | Safb2 | 0.000659861 | 0.279432432 | 0.323 | 0.197 | 1 | late aNSCs |
| Soga31 | Soga3 | 0.000682903 | 0.265688956 | 0.466 | 0.31 | 1 | late aNSCs |
| Zfc3h1 | Zfc3h1 | 0.000761999 | 0.259658573 | 0.36 | 0.215 | 1 | late aNSCs |
| Ube3c | Ube3c | 0.00077495 | 0.317034772 | 0.565 | 0.415 | 1 | late aNSCs |
| Trio1 | Trio | 0.000854264 | 0.271058509 | 0.596 | 0.421 | 1 | late aNSCs |
| Khsrp | Khsrp | 0.000913491 | 0.268432793 | 0.255 | 0.15 | 1 | late aNSCs |
| Psmd14 | Psmd14 | 0.000934024 | 0.261189124 | 0.429 | 0.274 | 1 | late aNSCs |
| Fam193a | Fam193a | 0.00097928 | 0.296591498 | 0.64 | 0.488 | 1 | late aNSCs |
| Rbbp6 | Rbbp6 | 0.000984531 | 0.251105182 | 0.509 | 0.34 | 1 | late aNSCs |
| Ddx5 | Ddx5 | 0.001021989 | 0.256581007 | 0.795 | 0.665 | 1 | late aNSCs |
| Pcnp | Pcnp | 0.001023325 | 0.290878804 | 0.348 | 0.217 | 1 | late aNSCs |
| Zmynd11 | Zmynd11 | 0.001057093 | 0.274879197 | 0.584 | 0.416 | 1 | late aNSCs |
| Eprs | Eprs | 0.001091238 | 0.305647446 | 0.261 | 0.159 | 1 | late aNSCs |
| Lrrtm31 | Lrrtm3 | 0.001132152 | 0.32531291 | 0.36 | 0.24 | 1 | late aNSCs |
| Senp2 | Senp2 | 0.001235181 | 0.288572109 | 0.311 | 0.196 | 1 | late aNSCs |
| R3hdm2 | R3hdm2 | 0.001262784 | 0.265850341 | 0.497 | 0.345 | 1 | late aNSCs |
| Purg | Purg | 0.001298719 | 0.35199205 | 0.46 | 0.313 | 1 | late aNSCs |
| Stt3b | Stt3b | 0.001316835 | 0.281931816 | 0.385 | 0.249 | 1 | late aNSCs |
| Nxph11 | Nxph1 | 0.001334474 | 0.57206301 | 0.267 | 0.167 | 1 | late aNSCs |
| Cfl2 | Cfl2 | 0.001426258 | 0.255928994 | 0.267 | 0.159 | 1 | late aNSCs |
| Ola1 | Ola1 | 0.001540659 | 0.316532381 | 0.304 | 0.193 | 1 | late aNSCs |
| Clint1 | Clint1 | 0.001587441 | 0.254446263 | 0.348 | 0.218 | 1 | late aNSCs |
| Tmem132b1 | Tmem132b | 0.001723986 | 0.376911457 | 0.298 | 0.19 | 1 | late aNSCs |
| Rock1 | Rock1 | 0.00189706 | 0.251713166 | 0.609 | 0.457 | 1 | late aNSCs |
| Tasp11 | Tasp1 | 0.001988698 | 0.253187924 | 0.36 | 0.232 | 1 | late aNSCs |
| Anks11 | Anks1 | 0.002092594 | 0.372620451 | 0.342 | 0.231 | 1 | late aNSCs |
| Coro2b | Coro2b | 0.002116937 | 0.303533136 | 0.429 | 0.292 | 1 | late aNSCs |
| Dot1l | Dot1l | 0.002193352 | 0.29823566 | 0.273 | 0.17 | 1 | late aNSCs |
| 4932438A13Rik | 4932438A13Rik | 0.002239242 | 0.290045997 | 0.497 | 0.368 | 1 | late aNSCs |
| Ppp6c | Ppp6c | 0.002271335 | 0.268954724 | 0.267 | 0.164 | 1 | late aNSCs |
| Dis3l2 | Dis3l2 | 0.002325212 | 0.27290409 | 0.503 | 0.35 | 1 | late aNSCs |
| Amn11 | Amn1 | 0.002371796 | 0.259588551 | 0.348 | 0.229 | 1 | late aNSCs |
| Wnk1 | Wnk1 | 0.002392353 | 0.253062975 | 0.683 | 0.532 | 1 | late aNSCs |
| Stau21 | Stau2 | 0.002599121 | 0.260942417 | 0.416 | 0.292 | 1 | late aNSCs |
| Odf21 | Odf2 | 0.002858829 | 0.281132374 | 0.385 | 0.265 | 1 | late aNSCs |
| Prkdc1 | Prkdc | 0.002937561 | 0.279098457 | 0.335 | 0.218 | 1 | late aNSCs |
| Gm98011 | Gm9801 | 0.003124644 | 0.250411923 | 0.317 | 0.203 | 1 | late aNSCs |
| Grik2 | Grik2 | 0.003251312 | 0.295637173 | 0.95 | 0.867 | 1 | late aNSCs |
| Ranbp2 | Ranbp2 | 0.003278431 | 0.27086721 | 0.416 | 0.286 | 1 | late aNSCs |
| Ppp2r2a | Ppp2r2a | 0.00335269 | 0.254217229 | 0.429 | 0.295 | 1 | late aNSCs |
| Kmt2c1 | Kmt2c | 0.004200641 | 0.285365283 | 0.839 | 0.688 | 1 | late aNSCs |
| Rheb | Rheb | 0.004537318 | 0.251097028 | 0.317 | 0.201 | 1 | late aNSCs |
| Wdr37 | Wdr37 | 0.004804341 | 0.252745519 | 0.342 | 0.225 | 1 | late aNSCs |
| Zc3h13 | Zc3h13 | 0.005047182 | 0.255805123 | 0.373 | 0.258 | 1 | late aNSCs |
| Cr1l | Cr1l | 0.005293132 | 0.257215286 | 0.255 | 0.162 | 1 | late aNSCs |
| Ddhd2 | Ddhd2 | 0.005836009 | 0.270124644 | 0.342 | 0.234 | 1 | late aNSCs |
| 4930578G10Rik1 | 4930578G10Rik | 0.005925949 | 0.280181286 | 0.522 | 0.382 | 1 | late aNSCs |
| Gprasp1 | Gprasp1 | 0.005948845 | 0.253354699 | 0.342 | 0.231 | 1 | late aNSCs |
| Tiam21 | Tiam2 | 0.006276332 | 0.35002395 | 0.509 | 0.419 | 1 | late aNSCs |
| Fam172a | Fam172a | 0.008633228 | 0.281287329 | 0.727 | 0.616 | 1 | late aNSCs |
