# Supplementary material for: Single-nucleus transcriptomic mapping uncovers targets for traumatic brain injury
Source: HighWire-hosted journal article supplement (doi:10.1101/gr.277881.123), 2023-09-20
Supplement: Supplemental_Table_S6.docx [file Supplemental_Table_S6.docx]

| **Supplemental Table S6. Differentially expressed genes in each NSC & astrocyte sub-type generated comparing the control and the mTBI SVZ, related to Figure 4. (qNSC DEGs)** | | | | | |
| --- | --- | --- | --- | --- | --- |
| Column1 | p_val | avg_log2FC | pct.1 | pct.2 | p_val_adj |
| Gm42418 | 1.66786E-14 | 0.664811492 | 1 | 1 | 3.78821E-10 |
| Wdr17 | 4.45857E-11 | -0.980900173 | 0.868 | 1 | 1.01267E-06 |
| Gpc5 | 1.65994E-07 | -0.378835543 | 1 | 1 | 0.003770219 |
| Lsamp | 5.44073E-07 | -0.338987979 | 1 | 1 | 0.012357524 |
| Htra1 | 1.75466E-06 | -0.863743096 | 0.401 | 0.746 | 0.039853567 |
| Snhg11 | 8.65296E-06 | 0.835714672 | 0.791 | 0.54 | 0.196534731 |
| Gria2 | 3.57252E-05 | -0.476296849 | 0.967 | 0.984 | 0.811425984 |
| Plp1 | 3.70678E-05 | 0.729568049 | 0.841 | 0.778 | 0.841920009 |
| Il1rapl1 | 3.98861E-05 | 0.635661896 | 0.907 | 0.762 | 0.905933686 |
| Zkscan3 | 4.38789E-05 | -0.635671404 | 0.33 | 0.651 | 0.996621551 |
| Aass | 4.87545E-05 | -0.515460454 | 0.044 | 0.222 | 1 |
| Sema3e | 5.51342E-05 | -0.556355439 | 0.022 | 0.159 | 1 |
| Pdp1 | 6.33619E-05 | -0.554600623 | 0.027 | 0.175 | 1 |
| Rufy2 | 7.05063E-05 | -0.567991946 | 0.121 | 0.349 | 1 |
| Dlg5 | 9.85262E-05 | -0.710911207 | 0.22 | 0.492 | 1 |
| Shisa9 | 9.95531E-05 | -0.585591582 | 0.566 | 0.841 | 1 |
| Ddn | 0.000130843 | -0.461317768 | 0.038 | 0.19 | 1 |
| Gm15577 | 0.000234046 | -0.456568922 | 0.016 | 0.127 | 1 |
| Snx3 | 0.00026221 | -0.541498422 | 0.187 | 0.444 | 1 |
| Paqr8 | 0.000267009 | -0.637081374 | 0.681 | 0.873 | 1 |
| Gm15489 | 0.000290513 | -0.605922167 | 0.071 | 0.238 | 1 |
| mt-Nd2 | 0.000349747 | -0.548480472 | 0.313 | 0.587 | 1 |
| Minos1 | 0.000437732 | -0.683346064 | 0.104 | 0.286 | 1 |
| Kctd5 | 0.000526837 | -0.497109141 | 0.066 | 0.222 | 1 |
| Ss18 | 0.000573491 | -0.622074395 | 0.093 | 0.27 | 1 |
| Atp6v1g2 | 0.000588222 | -0.497584688 | 0.093 | 0.27 | 1 |
| 5031439G07Rik | 0.000603126 | 0.847145443 | 0.538 | 0.365 | 1 |
| Bfar | 0.00060442 | -0.63315166 | 0.11 | 0.286 | 1 |
| Tmem33 | 0.00060707 | -0.753694632 | 0.077 | 0.238 | 1 |
| Oprm1 | 0.000620346 | -0.534951726 | 0.027 | 0.143 | 1 |
| 5730480H06Rik | 0.000626656 | -0.477176314 | 0.049 | 0.19 | 1 |
| Gm15601 | 0.000642602 | -0.61934791 | 0.093 | 0.27 | 1 |
| Cry1 | 0.000687998 | -0.486487888 | 0.049 | 0.19 | 1 |
| Gm29683 | 0.000701046 | 0.864939258 | 0.308 | 0.079 | 1 |
| Camk1d | 0.00072152 | 0.48132757 | 0.813 | 0.651 | 1 |
| Cmss1 | 0.000747519 | 0.548790072 | 0.874 | 0.794 | 1 |
| Gm2115 | 0.000758899 | -0.514984891 | 0.126 | 0.333 | 1 |
| Ppp4r3b | 0.000782517 | -0.577000305 | 0.143 | 0.333 | 1 |
| Sem1 | 0.00096285 | -0.551763635 | 0.06 | 0.206 | 1 |
| Emx2os | 0.000963729 | -0.496988245 | 0.022 | 0.127 | 1 |
| Ackr1 | 0.001008505 | -0.390747815 | 0.016 | 0.111 | 1 |
| Ube2g2 | 0.001030273 | -0.406470114 | 0.016 | 0.111 | 1 |
| Mydgf | 0.001052476 | -0.375993224 | 0.016 | 0.111 | 1 |
| Arf3 | 0.001114063 | -0.505598121 | 0.258 | 0.492 | 1 |
| Nnat | 0.001124083 | 1.048521131 | 0.61 | 0.444 | 1 |
| Mrps33 | 0.001135434 | -0.745137605 | 0.055 | 0.19 | 1 |
| Ap2a2 | 0.00114729 | 0.72933046 | 0.181 | 0.016 | 1 |
| Gm26835 | 0.001151927 | -0.557680204 | 0.231 | 0.46 | 1 |
| Gm27003 | 0.00117028 | -0.339722133 | 0.016 | 0.111 | 1 |
| mt-Nd3 | 0.001178885 | -0.486104644 | 0.082 | 0.238 | 1 |
| Nrg2 | 0.001263058 | 0.779956707 | 0.247 | 0.063 | 1 |
| Unc80 | 0.001613882 | 0.684358426 | 0.253 | 0.063 | 1 |
| Eml5 | 0.001807272 | -0.594425413 | 0.214 | 0.429 | 1 |
| Bbof1 | 0.001908593 | -0.581700257 | 0.099 | 0.254 | 1 |
| Nit1 | 0.002063637 | -0.289385827 | 0.038 | 0.159 | 1 |
| Dtnbp1 | 0.002228544 | -0.461989808 | 0.077 | 0.222 | 1 |
| Ddx5 | 0.002252131 | -0.488062166 | 0.593 | 0.794 | 1 |
| Nectin3 | 0.002275681 | -0.438662872 | 0.126 | 0.302 | 1 |
| Pard3bos1 | 0.002419826 | -0.338249813 | 0.066 | 0.206 | 1 |
| Avl9 | 0.002570882 | -0.400407292 | 0.099 | 0.254 | 1 |
| Fam204a | 0.002629787 | -0.443768234 | 0.11 | 0.27 | 1 |
| Vav3 | 0.002862961 | -0.596858727 | 0.258 | 0.46 | 1 |
| Tipin | 0.002943619 | -0.346632877 | 0.027 | 0.127 | 1 |
| Msra | 0.003006999 | -0.531249161 | 0.082 | 0.222 | 1 |
| Txlng | 0.00311217 | -0.525015802 | 0.143 | 0.317 | 1 |
| Ptprz1 | 0.003343709 | -0.26821824 | 0.94 | 0.984 | 1 |
| Tmem38a | 0.003601306 | -0.386531477 | 0.071 | 0.206 | 1 |
| Gigyf2 | 0.003611891 | -0.321965036 | 0.33 | 0.556 | 1 |
| Dcp1a | 0.003663562 | -0.561755516 | 0.115 | 0.27 | 1 |
| mt-Co3 | 0.003716172 | -0.558722806 | 0.681 | 0.841 | 1 |
| Plcd4 | 0.003717377 | -0.520257629 | 0.269 | 0.476 | 1 |
| Ssbp4 | 0.003783248 | -0.369177499 | 0.071 | 0.206 | 1 |
| Wdr75 | 0.003798505 | -0.363391158 | 0.022 | 0.111 | 1 |
| Polr2k | 0.003798505 | -0.269611949 | 0.022 | 0.111 | 1 |
| Gm2164 | 0.003868638 | -0.324815947 | 0.022 | 0.111 | 1 |
| Mrpl51 | 0.004067023 | -0.433713136 | 0.038 | 0.143 | 1 |
| Dgki | 0.004115631 | -0.423379602 | 0.313 | 0.54 | 1 |
| Clock | 0.004232404 | -0.442670737 | 0.192 | 0.381 | 1 |
| Cant1 | 0.004237266 | -0.283867421 | 0.022 | 0.111 | 1 |
| Rfx4 | 0.00424071 | 0.493840527 | 0.725 | 0.54 | 1 |
| 2310022B05Rik | 0.00433273 | 0.701778309 | 0.308 | 0.127 | 1 |
| Gm26804 | 0.004500439 | -0.371736967 | 0.401 | 0.635 | 1 |
| Smim4 | 0.004746817 | -0.401189538 | 0.088 | 0.222 | 1 |
| Timm9 | 0.004965128 | -0.402088121 | 0.066 | 0.19 | 1 |
| Acsf2 | 0.005293731 | -0.419331328 | 0.049 | 0.159 | 1 |
| Zscan21 | 0.005332621 | -0.282487856 | 0.038 | 0.143 | 1 |
| Cdh2 | 0.005345207 | -0.515466938 | 0.582 | 0.698 | 1 |
| Tex10 | 0.00540866 | -0.418654594 | 0.033 | 0.127 | 1 |
| Gstt1 | 0.005515897 | -0.357143542 | 0.049 | 0.159 | 1 |
| Dync2h1 | 0.005597388 | -0.349074381 | 0.302 | 0.524 | 1 |
| Aar2 | 0.005670538 | -0.393615577 | 0.033 | 0.127 | 1 |
| Rabep1 | 0.005915916 | -0.419959591 | 0.511 | 0.698 | 1 |
| Eif4g2 | 0.005925378 | -0.385259701 | 0.115 | 0.27 | 1 |
| Arpp19 | 0.005998974 | -0.510644717 | 0.22 | 0.413 | 1 |
| Btg1 | 0.006010791 | -0.418503228 | 0.06 | 0.175 | 1 |
| Robo2 | 0.006094727 | 0.852800052 | 0.412 | 0.27 | 1 |
| 9530059O14Rik | 0.006116778 | -0.448477407 | 0.044 | 0.143 | 1 |
| Tmtc3 | 0.006132507 | -0.377032583 | 0.033 | 0.127 | 1 |
| Rap1gap | 0.006190087 | -0.343289093 | 0.214 | 0.413 | 1 |
| Wdcp | 0.00623378 | -0.373827351 | 0.049 | 0.159 | 1 |
| Zfp354c | 0.006403016 | -0.357790075 | 0.06 | 0.175 | 1 |
| Ncoa4 | 0.006425697 | -0.356281566 | 0.033 | 0.127 | 1 |
| Flywch1 | 0.006448595 | -0.367849259 | 0.115 | 0.27 | 1 |
| Zdhhc20 | 0.006477144 | 0.782319597 | 0.335 | 0.175 | 1 |
| Pcdh9 | 0.006537058 | -0.274389032 | 1 | 1 | 1 |
| Zfp322a | 0.006566396 | -0.392447609 | 0.11 | 0.254 | 1 |
| Vit | 0.006582554 | -0.488540312 | 0.148 | 0.302 | 1 |
| Gripap1 | 0.006728147 | 0.694299857 | 0.187 | 0.048 | 1 |
| Zfp260 | 0.006837243 | -0.444125394 | 0.11 | 0.254 | 1 |
| 1110008F13Rik | 0.006903988 | -0.526442373 | 0.06 | 0.175 | 1 |
| 2010315B03Rik | 0.007285995 | 0.593237809 | 0.137 | 0.016 | 1 |
| Tbc1d14 | 0.007309219 | -0.674232502 | 0.055 | 0.159 | 1 |
| Kank1 | 0.007414589 | -0.427596484 | 0.516 | 0.714 | 1 |
| Pcbp1 | 0.007532756 | -0.435228889 | 0.06 | 0.175 | 1 |
| Kidins220 | 0.007593222 | -0.392362789 | 0.555 | 0.746 | 1 |
| Grm1 | 0.007620207 | 0.601074284 | 0.209 | 0.063 | 1 |
| Rap1gap2 | 0.007625315 | 0.615406923 | 0.165 | 0.032 | 1 |
| Cript | 0.0078176 | -0.414257234 | 0.06 | 0.175 | 1 |
| S100b | 0.007822969 | 0.527235441 | 0.104 | 0 | 1 |
| Prr7 | 0.007822969 | -0.306817296 | 0.049 | 0.159 | 1 |
| Agrn | 0.007848965 | 0.628806888 | 0.203 | 0.063 | 1 |
| Eef2 | 0.007911699 | 0.685602987 | 0.22 | 0.079 | 1 |
| Ash1l | 0.008373339 | 0.486642419 | 0.626 | 0.54 | 1 |
| Dpy30 | 0.008434346 | -0.447100726 | 0.082 | 0.206 | 1 |
| Atp1a1 | 0.008503896 | -0.44094874 | 0.143 | 0.302 | 1 |
| Rapgef1 | 0.008612715 | 0.611593508 | 0.275 | 0.111 | 1 |
| Ube2e1 | 0.008628135 | -0.465769591 | 0.126 | 0.27 | 1 |
| Zc3h12c | 0.00871675 | -0.39418934 | 0.082 | 0.206 | 1 |
| Gm14964 | 0.008837566 | 0.661401123 | 0.28 | 0.127 | 1 |
| Zfp706 | 0.008922152 | -0.34986912 | 0.071 | 0.19 | 1 |
| Ldlrad3 | 0.009054253 | -0.462903006 | 0.143 | 0.302 | 1 |
| Gm34408 | 0.009161206 | -0.318962528 | 0.027 | 0.111 | 1 |
| Fgfr2 | 0.009355069 | -0.44989742 | 0.742 | 0.841 | 1 |
| Mrpl32 | 0.00946051 | -0.27376322 | 0.027 | 0.111 | 1 |
| Spaca6 | 0.009466257 | -0.458456514 | 0.077 | 0.19 | 1 |
| Gm26836 | 0.009523529 | -0.520447688 | 0.093 | 0.222 | 1 |
| Glyr1 | 0.00959489 | -0.446852484 | 0.148 | 0.302 | 1 |
| Zfp263 | 0.009768505 | -0.28852491 | 0.027 | 0.111 | 1 |
| Hspa8 | 0.010077905 | -0.493262441 | 0.308 | 0.524 | 1 |
| Mtdh | 0.010304335 | -0.372676529 | 0.379 | 0.587 | 1 |
| Sgip1 | 0.010316362 | 0.613790244 | 0.604 | 0.508 | 1 |
| 4930402H24Rik | 0.010326284 | -0.332446055 | 0.846 | 1 | 1 |
| Slc25a21 | 0.010378421 | -0.753486043 | 0.264 | 0.429 | 1 |
| Cldn11 | 0.010381408 | 0.694273114 | 0.236 | 0.095 | 1 |
| Arfgef1 | 0.010412157 | 0.580411019 | 0.396 | 0.238 | 1 |
| Rad51d | 0.010576098 | -0.342285808 | 0.038 | 0.127 | 1 |
| Gna13 | 0.010606869 | -0.497744054 | 0.341 | 0.524 | 1 |
| Dalrd3 | 0.010788285 | -0.293586862 | 0.044 | 0.143 | 1 |
| Kat7 | 0.010820604 | -0.480936635 | 0.077 | 0.19 | 1 |
| Sdhb | 0.01090548 | -0.427938299 | 0.066 | 0.175 | 1 |
| Zfp641 | 0.010926522 | -0.423161367 | 0.187 | 0.349 | 1 |
| Bpgm | 0.011114899 | -0.467514622 | 0.055 | 0.159 | 1 |
| Wfs1 | 0.011153715 | -0.335874908 | 0.104 | 0.238 | 1 |
| Dhx30 | 0.011158178 | -0.382179718 | 0.236 | 0.413 | 1 |
| Epc1 | 0.011163486 | -0.44057564 | 0.467 | 0.667 | 1 |
| Pnpt1 | 0.011396143 | 0.493361965 | 0.154 | 0.032 | 1 |
| Gm28375 | 0.011425531 | -0.378999434 | 0.066 | 0.175 | 1 |
| Strbp | 0.01151959 | -0.383859993 | 0.665 | 0.762 | 1 |
| Axl | 0.011557997 | 0.475101883 | 0.126 | 0.016 | 1 |
| AC149090.1 | 0.011587119 | 0.572760589 | 0.22 | 0.079 | 1 |
| Gphn | 0.011614432 | 0.292035026 | 0.973 | 0.952 | 1 |
| Abr | 0.01173898 | 0.415038433 | 0.808 | 0.762 | 1 |
| Per1 | 0.011972214 | -0.401883915 | 0.088 | 0.206 | 1 |
| Slc24a3 | 0.012216079 | -0.459180939 | 0.39 | 0.571 | 1 |
| Ppia | 0.012335451 | -0.462407057 | 0.33 | 0.524 | 1 |
| Trrap | 0.0124803 | -0.34909099 | 0.137 | 0.286 | 1 |
| Chrm1 | 0.012530726 | -0.390192899 | 0.038 | 0.127 | 1 |
| Rps12-ps3 | 0.012704264 | -0.345532482 | 0.049 | 0.143 | 1 |
| Sppl3 | 0.012815976 | -0.290323989 | 0.258 | 0.46 | 1 |
| Rcan2 | 0.012897405 | -0.476734773 | 0.236 | 0.397 | 1 |
| Lmbrd2 | 0.012906526 | 0.471612616 | 0.176 | 0.048 | 1 |
| Sparc | 0.013154879 | -0.440011857 | 0.258 | 0.444 | 1 |
| Hspa5 | 0.013501333 | -0.415955169 | 0.137 | 0.286 | 1 |
| Tmem59l | 0.013577038 | 0.481860591 | 0.121 | 0.016 | 1 |
| Parp4 | 0.013577113 | -0.315769217 | 0.066 | 0.175 | 1 |
| Tecpr1 | 0.013624919 | 0.534164935 | 0.148 | 0.032 | 1 |
| Odf2 | 0.013836989 | 0.622508982 | 0.341 | 0.19 | 1 |
| Nfasc | 0.013962057 | -0.561926066 | 0.22 | 0.365 | 1 |
| Pitpna | 0.014076614 | 0.478900128 | 0.258 | 0.111 | 1 |
| Tnks | 0.014193485 | 0.585505633 | 0.335 | 0.19 | 1 |
| Sap130 | 0.014252797 | -0.361930994 | 0.148 | 0.302 | 1 |
| Rad9b | 0.01440638 | -0.486653978 | 0.06 | 0.159 | 1 |
| Lrp6 | 0.014594611 | -0.345290201 | 0.264 | 0.444 | 1 |
| Gm20275 | 0.01461436 | -0.426847575 | 0.187 | 0.365 | 1 |
| Smim3 | 0.014614429 | -0.345219362 | 0.049 | 0.143 | 1 |
| Tmem68 | 0.014861112 | -0.488559397 | 0.099 | 0.222 | 1 |
| Etnppl | 0.014883551 | -0.565180734 | 0.478 | 0.651 | 1 |
| Zdhhc14 | 0.015050887 | -0.389733773 | 0.187 | 0.333 | 1 |
| Pnmal1 | 0.015099875 | -0.510641136 | 0.06 | 0.159 | 1 |
| Bcap31 | 0.015320044 | -0.381416544 | 0.088 | 0.206 | 1 |
| Smg5 | 0.015325474 | 0.535910365 | 0.17 | 0.048 | 1 |
| Actr3b | 0.015446469 | -0.528623416 | 0.286 | 0.444 | 1 |
| AC112943.2 | 0.015577078 | -0.269315225 | 0.033 | 0.111 | 1 |
| Gm26668 | 0.015805906 | -0.415789884 | 0.033 | 0.111 | 1 |
| Rab18 | 0.015815974 | -0.47388624 | 0.082 | 0.19 | 1 |
| Ube2j1 | 0.015891832 | -0.458377558 | 0.071 | 0.175 | 1 |
| Pibf1 | 0.015971313 | -0.454214695 | 0.269 | 0.429 | 1 |
| Ppp2cb | 0.016037685 | -0.401881632 | 0.033 | 0.111 | 1 |
| Adam23 | 0.016085104 | -0.634534863 | 0.225 | 0.365 | 1 |
| Csrp1 | 0.016100823 | 0.521679694 | 0.445 | 0.286 | 1 |
| Snrnp40 | 0.01615846 | -0.311407315 | 0.049 | 0.143 | 1 |
| Tiparp | 0.016193071 | -0.463988525 | 0.22 | 0.365 | 1 |
| Inpp4b | 0.016275606 | 0.499080389 | 0.143 | 0.032 | 1 |
| Klc1 | 0.016529032 | -0.475345059 | 0.247 | 0.413 | 1 |
| Pbrm1 | 0.016533146 | -0.315990038 | 0.341 | 0.508 | 1 |
| Gm10036 | 0.016566188 | -0.333175634 | 0.049 | 0.143 | 1 |
| Bcl9 | 0.016640274 | 0.567957522 | 0.236 | 0.095 | 1 |
| Hdac2 | 0.016835689 | 0.507371836 | 0.17 | 0.048 | 1 |
| Ppp1r1b | 0.017107175 | -0.312393162 | 0.214 | 0.381 | 1 |
| Sorbs1 | 0.017358097 | 0.421969043 | 0.874 | 0.841 | 1 |
| Atp5h | 0.017557722 | -0.319643783 | 0.077 | 0.19 | 1 |
| Ubl3 | 0.017948577 | -0.376282693 | 0.269 | 0.444 | 1 |
| Got2 | 0.017986478 | -0.319577453 | 0.088 | 0.206 | 1 |
| Chfr | 0.018253342 | -0.522740044 | 0.132 | 0.254 | 1 |
| Ogfod1 | 0.018461924 | -0.383865603 | 0.082 | 0.19 | 1 |
| Grm3 | 0.018527587 | -0.390883389 | 0.747 | 0.825 | 1 |
| Sp1 | 0.018810827 | -0.405701434 | 0.06 | 0.159 | 1 |
| Slc12a5 | 0.01881448 | -0.307494593 | 0.132 | 0.27 | 1 |
| Ralyl | 0.018843453 | -0.660634468 | 0.346 | 0.492 | 1 |
| Ssbp2 | 0.018882877 | -0.307565767 | 0.687 | 0.81 | 1 |
| Slc7a2 | 0.019118284 | -0.33095388 | 0.225 | 0.413 | 1 |
| Zc2hc1a | 0.019229809 | -0.342288602 | 0.082 | 0.19 | 1 |
| Lrp1b | 0.019281255 | 0.312889784 | 0.989 | 0.937 | 1 |
| Gm39469 | 0.019479239 | -0.256477638 | 0.077 | 0.19 | 1 |
| Gm44686 | 0.019518266 | -0.372265029 | 0.137 | 0.27 | 1 |
| Fbxw7 | 0.019604976 | -0.390573246 | 0.154 | 0.302 | 1 |
| Fam117b | 0.019877859 | -0.547382395 | 0.148 | 0.27 | 1 |
| Dcaf12l1 | 0.019890462 | -0.295723892 | 0.033 | 0.111 | 1 |
| Kif5a | 0.019989154 | 0.589009911 | 0.159 | 0.048 | 1 |
| Tmlhe | 0.020050156 | -0.358777963 | 0.17 | 0.317 | 1 |
| Slc39a10 | 0.020090399 | -0.27405317 | 0.077 | 0.19 | 1 |
| Ric1 | 0.020104304 | -0.540491447 | 0.17 | 0.302 | 1 |
| Blmh | 0.020177595 | 0.556829837 | 0.159 | 0.048 | 1 |
| Zbtb4 | 0.020367585 | -0.29977662 | 0.099 | 0.222 | 1 |
| Gosr2 | 0.020460852 | -0.250964802 | 0.033 | 0.111 | 1 |
| Pik3ip1 | 0.020486637 | 0.574111564 | 0.225 | 0.095 | 1 |
| Gria1 | 0.020509517 | 0.492772289 | 0.857 | 0.841 | 1 |
| Jak2 | 0.020511707 | -0.299454363 | 0.11 | 0.238 | 1 |
| Rpl19 | 0.020661154 | -0.284606263 | 0.049 | 0.143 | 1 |
| Ccnh | 0.020714375 | 0.443374089 | 0.209 | 0.079 | 1 |
| Usp47 | 0.020798073 | -0.314661476 | 0.319 | 0.508 | 1 |
| Sub1 | 0.021064869 | -0.410045454 | 0.17 | 0.302 | 1 |
| Ppm1h | 0.021076803 | 0.512967282 | 0.187 | 0.063 | 1 |
| Gnb1 | 0.021119709 | -0.267613349 | 0.363 | 0.556 | 1 |
| Meis2 | 0.021147391 | -0.377132081 | 0.67 | 0.825 | 1 |
| Etv4 | 0.021156106 | -0.440933314 | 0.099 | 0.206 | 1 |
| Nkain3 | 0.021445021 | -0.284359256 | 0.121 | 0.254 | 1 |
| Tmem246 | 0.021487481 | 0.489124208 | 0.137 | 0.032 | 1 |
| Frem1 | 0.022211883 | -0.491875093 | 0.132 | 0.254 | 1 |
| Chm | 0.022358203 | -0.325044778 | 0.187 | 0.349 | 1 |
| Klf13 | 0.022451561 | -0.352849225 | 0.115 | 0.238 | 1 |
| Pnmal2 | 0.022484535 | -0.360688578 | 0.137 | 0.27 | 1 |
| Mbtd1 | 0.022603502 | -0.331493364 | 0.368 | 0.571 | 1 |
| H2afj | 0.022646059 | -0.401182668 | 0.055 | 0.143 | 1 |
| Dclre1c | 0.023168876 | 0.500259544 | 0.132 | 0.032 | 1 |
| Arpc5l | 0.023242526 | -0.336382036 | 0.071 | 0.175 | 1 |
| Gli1 | 0.023403664 | 0.457846066 | 0.132 | 0.032 | 1 |
| Sdf2 | 0.023857438 | -0.322218589 | 0.104 | 0.222 | 1 |
| Ube2g1 | 0.023865548 | -0.305719134 | 0.297 | 0.476 | 1 |
| Dazap1 | 0.024208085 | 0.512967135 | 0.203 | 0.079 | 1 |
| Gm48747 | 0.02461601 | -0.504814094 | 0.456 | 0.603 | 1 |
| Abca1 | 0.024662593 | -0.466082217 | 0.577 | 0.714 | 1 |
| Atp1a3 | 0.024664324 | -0.43838413 | 0.308 | 0.476 | 1 |
| Lcorl | 0.024963825 | -0.413830202 | 0.275 | 0.444 | 1 |
| Slc22a4 | 0.024965079 | -0.290447224 | 0.148 | 0.286 | 1 |
| Traf5 | 0.025106362 | -0.334508157 | 0.066 | 0.159 | 1 |
| 1700030F04Rik | 0.025106362 | -0.470629486 | 0.066 | 0.159 | 1 |
| Sh3rf3 | 0.025134461 | 0.496291798 | 0.104 | 0.016 | 1 |
| Vps29 | 0.025184484 | -0.29674606 | 0.104 | 0.222 | 1 |
| Kansl1 | 0.025218574 | -0.38950637 | 0.654 | 0.825 | 1 |
| Fstl1 | 0.025481074 | -0.430147241 | 0.22 | 0.365 | 1 |
| Exoc6b | 0.025689175 | 0.570750788 | 0.511 | 0.381 | 1 |
| Znrf2 | 0.02570486 | 0.437970153 | 0.104 | 0.016 | 1 |
| Stk17b | 0.025718856 | -0.358596013 | 0.055 | 0.143 | 1 |
| Syncrip | 0.025811582 | -0.383440501 | 0.132 | 0.254 | 1 |
| Idh2 | 0.025862758 | -0.398614129 | 0.077 | 0.175 | 1 |
| Tmem243 | 0.025874515 | -0.409323472 | 0.225 | 0.365 | 1 |
| 6030458C11Rik | 0.0260153 | -0.384237278 | 0.055 | 0.143 | 1 |
| Atxn10 | 0.026587557 | -0.35885435 | 0.357 | 0.492 | 1 |
| Pum2 | 0.026694412 | -0.438142525 | 0.247 | 0.397 | 1 |
| Cul9 | 0.026979042 | -0.442724327 | 0.11 | 0.222 | 1 |
| Sema4d | 0.026999874 | -0.426109066 | 0.148 | 0.27 | 1 |
| Tmcc3 | 0.027224765 | 0.534168441 | 0.758 | 0.778 | 1 |
| Gpd1l | 0.027542233 | -0.286968485 | 0.055 | 0.143 | 1 |
| Itsn2 | 0.027677264 | -0.351836174 | 0.33 | 0.492 | 1 |
| Dync1li1 | 0.028033871 | -0.383547262 | 0.121 | 0.238 | 1 |
| Gm21992 | 0.02805895 | -0.39356773 | 0.264 | 0.429 | 1 |
| Cdc42 | 0.028149441 | -0.316021707 | 0.264 | 0.429 | 1 |
| Smox | 0.028291794 | -0.495806666 | 0.236 | 0.349 | 1 |
| Tacc1 | 0.028398218 | 0.55016243 | 0.357 | 0.222 | 1 |
| Stim1 | 0.028438377 | -0.369149994 | 0.319 | 0.492 | 1 |
| Dnm3 | 0.028472756 | 0.608069094 | 0.297 | 0.159 | 1 |
| Lonrf3 | 0.028491178 | -0.37352666 | 0.154 | 0.286 | 1 |
| Ppid | 0.028494862 | -0.307662822 | 0.055 | 0.143 | 1 |
| Fbxl2 | 0.028495012 | -0.288373481 | 0.055 | 0.143 | 1 |
| Slc1a1 | 0.028495012 | -0.254385906 | 0.055 | 0.143 | 1 |
| Erlec1 | 0.028717822 | -0.329600948 | 0.099 | 0.206 | 1 |
| Fhit | 0.028735057 | -0.37437498 | 0.533 | 0.698 | 1 |
| Dcakd | 0.028838157 | -0.420764018 | 0.066 | 0.159 | 1 |
| Tab3 | 0.028883327 | -0.400877291 | 0.077 | 0.175 | 1 |
| Rttn | 0.028883327 | -0.336836758 | 0.077 | 0.175 | 1 |
| Pex13 | 0.028935351 | -0.281189751 | 0.11 | 0.222 | 1 |
| Atf2 | 0.029032088 | -0.579601259 | 0.313 | 0.444 | 1 |
| Golph3l | 0.029130118 | -0.392914978 | 0.038 | 0.111 | 1 |
| Lynx1 | 0.029476047 | -0.253508721 | 0.055 | 0.143 | 1 |
| Gm11361 | 0.029510893 | -0.380743617 | 0.038 | 0.111 | 1 |
| Mical3 | 0.029641182 | 0.458024889 | 0.264 | 0.127 | 1 |
| Atad3a | 0.029764209 | -0.279841321 | 0.066 | 0.159 | 1 |
| Esco1 | 0.029820552 | -0.464122359 | 0.236 | 0.381 | 1 |
| Bhlhb9 | 0.030353777 | -0.2879731 | 0.077 | 0.175 | 1 |
| Glrx3 | 0.030395685 | -0.301342345 | 0.066 | 0.159 | 1 |
| Dnajc24 | 0.030478591 | -0.339937044 | 0.143 | 0.27 | 1 |
| Eprs | 0.030487181 | -0.401856358 | 0.121 | 0.238 | 1 |
| Atg4c | 0.030613499 | 0.445394554 | 0.176 | 0.063 | 1 |
| Ppp1cb | 0.030758139 | -0.556299939 | 0.22 | 0.365 | 1 |
| Ldah | 0.031128939 | -0.463143751 | 0.132 | 0.238 | 1 |
| Srgap2 | 0.031166548 | 0.583187828 | 0.346 | 0.222 | 1 |
| Pcsk6 | 0.031426756 | 0.404976867 | 0.154 | 0.048 | 1 |
| Hnrnpul2 | 0.031426756 | -0.299910426 | 0.099 | 0.206 | 1 |
| Taf1d | 0.031479627 | -0.279922954 | 0.038 | 0.111 | 1 |
| Bmpr1a | 0.031655177 | -0.254450336 | 0.451 | 0.667 | 1 |
| Pdia3 | 0.031693226 | -0.309833896 | 0.066 | 0.159 | 1 |
| Ralgapa1 | 0.031905312 | -0.441671719 | 0.544 | 0.698 | 1 |
| Rev3l | 0.031964142 | 0.443638004 | 0.599 | 0.524 | 1 |
| Mark3 | 0.031987341 | -0.336296663 | 0.451 | 0.619 | 1 |
| Cops7b | 0.032051965 | -0.42725311 | 0.06 | 0.143 | 1 |
| Ccdc190 | 0.032611162 | 0.493783506 | 0.253 | 0.127 | 1 |
| Rpsa | 0.032752516 | -0.409964643 | 0.049 | 0.127 | 1 |
| Nme7 | 0.032997792 | -0.330283486 | 0.176 | 0.302 | 1 |
| Gm48512 | 0.03313681 | -0.378251977 | 0.049 | 0.127 | 1 |
| Mfhas1 | 0.033284876 | -0.529329309 | 0.275 | 0.429 | 1 |
| Nbas | 0.033339889 | -0.521944099 | 0.22 | 0.365 | 1 |
| Meg3 | 0.033346233 | 0.456626541 | 0.879 | 0.841 | 1 |
| Ivns1abp | 0.033396642 | -0.291011644 | 0.121 | 0.238 | 1 |
| Ddx46 | 0.033396642 | -0.282176687 | 0.121 | 0.238 | 1 |
| Adck1 | 0.033522077 | -0.351079548 | 0.104 | 0.206 | 1 |
| Zfp568 | 0.033524956 | -0.373566214 | 0.049 | 0.127 | 1 |
| Chd4 | 0.033714453 | 0.473043714 | 0.505 | 0.365 | 1 |
| Usp19 | 0.033816588 | -0.394240299 | 0.077 | 0.175 | 1 |
| Ky | 0.033834213 | -0.354683066 | 0.06 | 0.143 | 1 |
| Alpl | 0.033916984 | -0.337633065 | 0.049 | 0.127 | 1 |
| Hs6st3 | 0.033963217 | 0.475427599 | 0.396 | 0.254 | 1 |
| Mindy4 | 0.033989856 | -0.31387356 | 0.038 | 0.111 | 1 |
| Ubr2 | 0.034061565 | -0.293649871 | 0.324 | 0.476 | 1 |
| Zfp871 | 0.034074825 | -0.395509125 | 0.137 | 0.254 | 1 |
| Aars | 0.034200654 | -0.334292765 | 0.06 | 0.143 | 1 |
| C130071C03Rik | 0.034380295 | 0.394677504 | 0.709 | 0.603 | 1 |
| Prox2 | 0.034424444 | -0.303168195 | 0.038 | 0.111 | 1 |
| Atraid | 0.034648075 | -0.43405526 | 0.082 | 0.175 | 1 |
| Lrrc8b | 0.034787193 | -0.308175905 | 0.066 | 0.159 | 1 |
| Sema6d | 0.034851639 | 0.539965693 | 0.736 | 0.698 | 1 |
| Dclk2 | 0.034863605 | -0.284526829 | 0.297 | 0.46 | 1 |
| Zfx | 0.034889822 | -0.270616957 | 0.165 | 0.302 | 1 |
| Mbd2 | 0.035253559 | 0.467218335 | 0.165 | 0.063 | 1 |
| Gm42556 | 0.035307875 | -0.318276742 | 0.038 | 0.111 | 1 |
| AC134414.1 | 0.03558004 | -0.4912751 | 0.181 | 0.302 | 1 |
| Swap70 | 0.03567114 | 0.366368028 | 0.126 | 0.032 | 1 |
| Hapln1 | 0.035700525 | -0.366080426 | 0.06 | 0.143 | 1 |
| Wnk2 | 0.035715891 | 0.481946262 | 0.434 | 0.286 | 1 |
| Frmd4a | 0.035817109 | -0.333065861 | 0.934 | 0.937 | 1 |
| Uba1 | 0.035843958 | -0.316876259 | 0.077 | 0.175 | 1 |
| Tagln3 | 0.035987978 | 0.545592881 | 0.181 | 0.079 | 1 |
| Ankrd10 | 0.036079443 | -0.358084749 | 0.132 | 0.254 | 1 |
| Agbl4 | 0.036081553 | 0.518630119 | 0.423 | 0.286 | 1 |
| AW549877 | 0.036158697 | -0.308212504 | 0.11 | 0.222 | 1 |
| Ndufaf4 | 0.036216512 | -0.306671636 | 0.099 | 0.206 | 1 |
| Appl2 | 0.036313949 | 0.447703222 | 0.659 | 0.667 | 1 |
| 9630028H03Rik | 0.036408303 | -0.468677803 | 0.308 | 0.444 | 1 |
| B3glct | 0.036471268 | -0.386997534 | 0.06 | 0.143 | 1 |
| Srp68 | 0.036990438 | -0.263082849 | 0.066 | 0.159 | 1 |
| Golga5 | 0.037092617 | 0.406503774 | 0.148 | 0.048 | 1 |
| Usp8 | 0.037289018 | -0.319153931 | 0.121 | 0.238 | 1 |
| H2afz | 0.037440407 | -0.384275277 | 0.121 | 0.238 | 1 |
| Chst2 | 0.037735067 | -0.370982108 | 0.082 | 0.175 | 1 |
| Asah1 | 0.037763038 | 0.509954987 | 0.181 | 0.079 | 1 |
| Slk | 0.037903173 | -0.318308166 | 0.148 | 0.27 | 1 |
| Osbpl1a | 0.037939574 | 0.523433536 | 0.286 | 0.159 | 1 |
| Zfp639 | 0.038178058 | -0.288260789 | 0.104 | 0.206 | 1 |
| Ddx19b | 0.038376349 | -0.33386678 | 0.071 | 0.159 | 1 |
| Ildr2 | 0.038494796 | 0.443230715 | 0.236 | 0.111 | 1 |
| Abi2 | 0.038673361 | -0.343551763 | 0.319 | 0.476 | 1 |
| Rasa2 | 0.038802349 | -0.316753439 | 0.385 | 0.556 | 1 |
| Ctsa | 0.038869096 | -0.31827032 | 0.06 | 0.143 | 1 |
| Rnf168 | 0.038935273 | -0.392581315 | 0.049 | 0.127 | 1 |
| Ap3s1 | 0.038999621 | 0.56574327 | 0.242 | 0.127 | 1 |
| Tppp | 0.039037604 | -0.276021791 | 0.038 | 0.111 | 1 |
| 2810403A07Rik | 0.039052813 | -0.325541421 | 0.209 | 0.349 | 1 |
| Arhgef11 | 0.039071596 | 0.504395984 | 0.412 | 0.302 | 1 |
| Aldh1a1 | 0.039178586 | 0.703020326 | 0.352 | 0.222 | 1 |
| Rragc | 0.03928148 | -0.30016579 | 0.06 | 0.143 | 1 |
| Gm19710 | 0.039320221 | -0.271830953 | 0.11 | 0.222 | 1 |
| Gramd1b | 0.03934144 | -0.27173917 | 0.467 | 0.635 | 1 |
| Ptch1 | 0.039471834 | 0.403359312 | 0.857 | 0.81 | 1 |
| Drg1 | 0.039548751 | -0.519497767 | 0.192 | 0.317 | 1 |
| Fam102a | 0.03985746 | -0.336163041 | 0.093 | 0.19 | 1 |
| Syde2 | 0.040117401 | -0.296376836 | 0.06 | 0.143 | 1 |
| Pex5l | 0.040415178 | 0.547666075 | 0.121 | 0.032 | 1 |
| Phactr3 | 0.040477301 | 0.382203293 | 0.615 | 0.54 | 1 |
| A330076C08Rik | 0.040620819 | 0.818407764 | 0.159 | 0.063 | 1 |
| AY036118 | 0.040664508 | -0.34278236 | 0.346 | 0.492 | 1 |
| RF01962 | 0.040688112 | -0.417229227 | 0.33 | 0.476 | 1 |
| Mllt10 | 0.041142519 | -0.320288212 | 0.632 | 0.778 | 1 |
| Tmem117 | 0.041296025 | 0.592977086 | 0.236 | 0.127 | 1 |
| Parp6 | 0.041298891 | -0.345032179 | 0.093 | 0.19 | 1 |
| Hes5 | 0.041568704 | 0.562804586 | 0.203 | 0.095 | 1 |
| Lims1 | 0.04162368 | -0.33458509 | 0.346 | 0.508 | 1 |
| Atf4 | 0.04167241 | -0.336312023 | 0.049 | 0.127 | 1 |
| Gm29237 | 0.041834569 | -0.306407192 | 0.06 | 0.143 | 1 |
| Hgsnat | 0.042212328 | -0.270657899 | 0.082 | 0.175 | 1 |
| Gm20404 | 0.042273453 | -0.298353271 | 0.06 | 0.143 | 1 |
| Sepsecs | 0.042351641 | -0.382562984 | 0.071 | 0.159 | 1 |
| 4933406I18Rik | 0.042408884 | 0.372360776 | 0.121 | 0.032 | 1 |
| Cdc14b | 0.042533561 | -0.446767716 | 0.11 | 0.206 | 1 |
| Uqcrc1 | 0.042767676 | -0.326742315 | 0.071 | 0.159 | 1 |
| Fam114a2 | 0.042767676 | 0.508405894 | 0.115 | 0.032 | 1 |
| Taf2 | 0.042767676 | -0.31239737 | 0.071 | 0.159 | 1 |
| Tpp2 | 0.042804941 | -0.284233461 | 0.17 | 0.302 | 1 |
| P4ha1 | 0.042804941 | -0.338435244 | 0.17 | 0.302 | 1 |
| Ric8b | 0.043325091 | -0.344343748 | 0.22 | 0.365 | 1 |
| Pfkfb4 | 0.043644576 | 0.396489431 | 0.121 | 0.032 | 1 |
| Fam20b | 0.043735316 | 0.418862286 | 0.143 | 0.048 | 1 |
| Anapc4 | 0.043739428 | -0.324443958 | 0.104 | 0.206 | 1 |
| Hsph1 | 0.043972019 | -0.415095844 | 0.11 | 0.206 | 1 |
| Scrg1 | 0.044043553 | -0.368359134 | 0.17 | 0.286 | 1 |
| Fancc | 0.044226735 | 0.492386252 | 0.181 | 0.079 | 1 |
| Kif3a | 0.044422022 | -0.34532705 | 0.115 | 0.222 | 1 |
| Comt | 0.044664494 | -0.352745396 | 0.165 | 0.286 | 1 |
| Gpm6a | 0.045092316 | -0.273665553 | 0.857 | 0.921 | 1 |
| Csdc2 | 0.045144321 | -0.295997799 | 0.115 | 0.222 | 1 |
| Aldh1l1 | 0.045259134 | 0.630195176 | 0.379 | 0.27 | 1 |
| Ppfia2 | 0.045266029 | 0.603206032 | 0.231 | 0.127 | 1 |
| Hmgcs1 | 0.045625765 | 0.446910829 | 0.181 | 0.079 | 1 |
| Pdgfc | 0.045876497 | -0.358332102 | 0.115 | 0.222 | 1 |
| Brf1 | 0.045890683 | -0.286458285 | 0.093 | 0.19 | 1 |
| Wnt7a | 0.045926728 | -0.300688817 | 0.06 | 0.143 | 1 |
| Scaf8 | 0.045975438 | 0.330459953 | 0.407 | 0.286 | 1 |
| Hspa9 | 0.045981292 | 0.467373701 | 0.181 | 0.079 | 1 |
| Rbfox3 | 0.046163431 | -0.252644032 | 0.06 | 0.143 | 1 |
| Gm45846 | 0.046400937 | 0.570858422 | 0.335 | 0.222 | 1 |
| N4bp2l1 | 0.046493807 | 0.393319308 | 0.143 | 0.048 | 1 |
| Ybx1 | 0.046779931 | 0.4402914 | 0.159 | 0.063 | 1 |
| Rtn4 | 0.046981533 | 0.373539355 | 0.505 | 0.413 | 1 |
| Fam19a5 | 0.046981637 | 0.407165256 | 0.511 | 0.397 | 1 |
| Fip1l1 | 0.047000543 | -0.311719698 | 0.181 | 0.302 | 1 |
| Ppp1ca | 0.04712136 | -0.287824165 | 0.071 | 0.159 | 1 |
| Acss2 | 0.047130821 | 0.480026181 | 0.291 | 0.175 | 1 |
| Jazf1 | 0.047348315 | -0.253914154 | 0.071 | 0.159 | 1 |
| Cd27 | 0.047363619 | -0.256421448 | 0.06 | 0.143 | 1 |
| Scn1a | 0.047426705 | 0.433270173 | 0.181 | 0.079 | 1 |
| Metap2 | 0.047794113 | 0.364185725 | 0.181 | 0.079 | 1 |
| Phgdh | 0.047944597 | 0.442327446 | 0.159 | 0.063 | 1 |
| Ppp6c | 0.048011337 | -0.298951694 | 0.148 | 0.27 | 1 |
| Mertk | 0.048260749 | -0.283564366 | 0.714 | 0.873 | 1 |
| Gm15520 | 0.048343349 | -0.329587082 | 0.093 | 0.19 | 1 |
| Ccdc82 | 0.048433441 | -0.311678933 | 0.082 | 0.175 | 1 |
| Lgi1 | 0.04848133 | 0.432789384 | 0.626 | 0.524 | 1 |
| C330007P06Rik | 0.048711744 | -0.309685239 | 0.088 | 0.175 | 1 |
| Serpine2 | 0.048715207 | -0.254466284 | 0.538 | 0.714 | 1 |
| Rabgef1 | 0.048734372 | 0.498422232 | 0.159 | 0.063 | 1 |
| Cds2 | 0.048787977 | -0.285399941 | 0.225 | 0.365 | 1 |
| Slc25a46 | 0.048838127 | -0.294742347 | 0.06 | 0.143 | 1 |
| Arhgap5 | 0.049196367 | -0.318421759 | 0.797 | 0.825 | 1 |
| Zfp91 | 0.049238145 | -0.277266805 | 0.203 | 0.333 | 1 |
| Slc4a8 | 0.049318746 | 0.421831093 | 0.137 | 0.048 | 1 |
| Clptm1 | 0.049491554 | -0.365852823 | 0.132 | 0.238 | 1 |
| Gm26944 | 0.049586062 | -0.366809286 | 0.088 | 0.175 | 1 |
| Ptprn | 0.049617064 | -0.326895711 | 0.143 | 0.254 | 1 |
| Wasf1 | 0.049724066 | -0.334080804 | 0.209 | 0.333 | 1 |
| Zbtb5 | 0.049969336 | 0.478742126 | 0.137 | 0.048 | 1 |
| Cacna1d | 0.050129131 | 0.513292186 | 0.407 | 0.286 | 1 |
| Nr2f2 | 0.050385932 | 0.431983106 | 0.115 | 0.032 | 1 |
| Malt1 | 0.050785315 | -0.347766978 | 0.044 | 0.111 | 1 |
| Add1 | 0.050805661 | -0.369696531 | 0.242 | 0.365 | 1 |
| Ptpn4 | 0.050821817 | -0.311926917 | 0.56 | 0.73 | 1 |
| Cdkal1 | 0.050886416 | -0.289743008 | 0.434 | 0.603 | 1 |
| Uvssa | 0.051374216 | 0.436979682 | 0.132 | 0.048 | 1 |
| Gja1 | 0.051704119 | 0.554090552 | 0.516 | 0.429 | 1 |
| Igf1r | 0.05184531 | 0.453305849 | 0.593 | 0.54 | 1 |
| Plaa | 0.051878943 | -0.290710323 | 0.154 | 0.27 | 1 |
| Hist1h2bc | 0.052574719 | -0.311713083 | 0.044 | 0.111 | 1 |
| Cltb | 0.052873137 | 0.397883756 | 0.137 | 0.048 | 1 |
| Mipol1 | 0.052967935 | 0.372542696 | 0.187 | 0.079 | 1 |
| Phf2 | 0.053285664 | -0.391279106 | 0.099 | 0.19 | 1 |
| Strn3 | 0.053291386 | -0.363283897 | 0.495 | 0.651 | 1 |
| B4gat1 | 0.053471548 | -0.361244901 | 0.055 | 0.127 | 1 |
| Oxr1 | 0.053701716 | -0.418005422 | 0.374 | 0.524 | 1 |
| Diexf | 0.053796699 | -0.267565571 | 0.044 | 0.111 | 1 |
| Degs1 | 0.053877812 | 0.476095678 | 0.11 | 0.032 | 1 |
| Pcdh19 | 0.053877812 | 0.451783386 | 0.11 | 0.032 | 1 |
| Eed | 0.0550423 | -0.293671678 | 0.044 | 0.111 | 1 |
| Dach1 | 0.055370222 | 0.56561279 | 0.297 | 0.19 | 1 |
| Tasp1 | 0.055395691 | 0.498016841 | 0.231 | 0.127 | 1 |
| Trmt13 | 0.0555653 | 0.419375178 | 0.154 | 0.063 | 1 |
| Skiv2l2 | 0.055595561 | -0.363908116 | 0.088 | 0.175 | 1 |
| Slc35a5 | 0.055674062 | -0.313799145 | 0.044 | 0.111 | 1 |
| Pi4ka | 0.056037169 | 0.350073775 | 0.473 | 0.349 | 1 |
| Lsm14a | 0.056321325 | -0.356316555 | 0.137 | 0.238 | 1 |
| Cbl | 0.056334931 | -0.39298983 | 0.176 | 0.286 | 1 |
| Rgs6 | 0.056475456 | 0.364999146 | 0.863 | 0.794 | 1 |
| Ankib1 | 0.056656797 | 0.555403834 | 0.269 | 0.159 | 1 |
| Gabbr2 | 0.056719032 | 0.395919029 | 0.725 | 0.619 | 1 |
| Atp13a3 | 0.056854272 | -0.328087438 | 0.154 | 0.27 | 1 |
| Mfsd1 | 0.056955716 | -0.321328764 | 0.044 | 0.111 | 1 |
| Fubp1 | 0.057253941 | -0.373823571 | 0.313 | 0.444 | 1 |
| Ldlrad4 | 0.057618455 | 0.339903516 | 0.313 | 0.175 | 1 |
| Brwd1 | 0.057630116 | 0.39389059 | 0.434 | 0.333 | 1 |
| Uba3 | 0.057759503 | -0.370421857 | 0.077 | 0.159 | 1 |
| Shc3 | 0.057891761 | -0.351164415 | 0.379 | 0.524 | 1 |
| Coq9 | 0.058063085 | 0.416555592 | 0.132 | 0.048 | 1 |
| Cdk9 | 0.05815269 | 0.398856437 | 0.11 | 0.032 | 1 |
| Tmem218 | 0.058261821 | -0.272825694 | 0.044 | 0.111 | 1 |
| Sirt7 | 0.058318644 | 0.447176421 | 0.154 | 0.063 | 1 |
| Utp14a | 0.058414213 | -0.31412831 | 0.066 | 0.143 | 1 |
| Fkbp1a | 0.058529861 | -0.326229471 | 0.165 | 0.286 | 1 |
| Arl5a | 0.058750677 | -0.328735342 | 0.055 | 0.127 | 1 |
| D8Ertd738e | 0.058924149 | -0.318442555 | 0.044 | 0.111 | 1 |
| Lmtk3 | 0.059075255 | 0.397166884 | 0.132 | 0.048 | 1 |
| Mid1 | 0.059249985 | -0.398291025 | 0.231 | 0.349 | 1 |
| Sms | 0.059264636 | 0.398337054 | 0.11 | 0.032 | 1 |
| Hexb | 0.05936309 | -0.277692289 | 0.055 | 0.127 | 1 |
| Fyttd1 | 0.059456798 | -0.407518611 | 0.154 | 0.254 | 1 |
| Atp2c1 | 0.059608672 | 0.414704594 | 0.385 | 0.254 | 1 |
| Mcm3ap | 0.059980791 | -0.25581128 | 0.055 | 0.127 | 1 |
| Lgi4 | 0.060321249 | 0.398223065 | 0.198 | 0.095 | 1 |
| Usp50 | 0.060698823 | 0.505143171 | 0.154 | 0.063 | 1 |
| Kcnc3 | 0.060712472 | -0.254482243 | 0.066 | 0.143 | 1 |
| Kif16b | 0.06072389 | -0.371800933 | 0.115 | 0.206 | 1 |
| Ahi1 | 0.060739174 | 0.516364199 | 0.445 | 0.365 | 1 |
| Wdr35 | 0.060749212 | -0.282540674 | 0.11 | 0.206 | 1 |
| Gm12353 | 0.061047632 | -0.290898718 | 0.253 | 0.381 | 1 |
| Mfap1b | 0.061232189 | -0.273340179 | 0.055 | 0.127 | 1 |
| Ubac1 | 0.061342826 | -0.263120409 | 0.099 | 0.19 | 1 |
| Dpysl3 | 0.061865951 | -0.276122047 | 0.055 | 0.127 | 1 |
| Idh3a | 0.061889406 | -0.336773658 | 0.066 | 0.143 | 1 |
| Gm47547 | 0.062121334 | 0.311408683 | 0.11 | 0.032 | 1 |
| Trmt1 | 0.062199987 | -0.339796397 | 0.088 | 0.175 | 1 |
| Wwp1 | 0.062321267 | 0.321761948 | 0.407 | 0.27 | 1 |
| Cyth1 | 0.062499857 | -0.297036149 | 0.214 | 0.333 | 1 |
| Tax1bp1 | 0.062576521 | -0.424403293 | 0.198 | 0.302 | 1 |
| Mras | 0.062682913 | -0.286004183 | 0.368 | 0.524 | 1 |
| Galc | 0.06273384 | -0.261481855 | 0.088 | 0.175 | 1 |
| Opa1 | 0.063019794 | 0.425615644 | 0.324 | 0.206 | 1 |
| Ckb | 0.063290108 | 0.300314905 | 0.665 | 0.587 | 1 |
| Pi4kb | 0.06348425 | 0.362957073 | 0.176 | 0.079 | 1 |
| Gpkow | 0.063690158 | -0.28837975 | 0.066 | 0.143 | 1 |
| Gatad2a | 0.063690158 | -0.253659397 | 0.066 | 0.143 | 1 |
| Tpt1 | 0.063812913 | -0.291914592 | 0.088 | 0.175 | 1 |
| 4932438A13Rik | 0.064021068 | 0.475049415 | 0.418 | 0.317 | 1 |
| Rhbdd1 | 0.064358172 | 0.395551352 | 0.132 | 0.048 | 1 |
| Gpatch2l | 0.064358172 | 0.391404875 | 0.132 | 0.048 | 1 |
| Desi1 | 0.064416864 | -0.359200742 | 0.099 | 0.19 | 1 |
| Azin1 | 0.064597809 | -0.401548652 | 0.148 | 0.254 | 1 |
| Frmpd1 | 0.064739653 | -0.370660684 | 0.269 | 0.397 | 1 |
| Trib2 | 0.064840545 | 0.455197088 | 0.192 | 0.095 | 1 |
| Fam168b | 0.065184426 | 0.421290684 | 0.231 | 0.127 | 1 |
| Tmem167 | 0.065302227 | 0.452275646 | 0.192 | 0.095 | 1 |
| Gab2 | 0.065385736 | -0.260430278 | 0.412 | 0.571 | 1 |
| Phyh | 0.065460229 | -0.286345895 | 0.088 | 0.175 | 1 |
| Nhsl1 | 0.065580838 | -0.28054231 | 0.824 | 0.968 | 1 |
| Gm48678 | 0.065612491 | -0.473855939 | 0.176 | 0.286 | 1 |
| Lama2 | 0.065686841 | 0.285572735 | 0.786 | 0.73 | 1 |
| Bmp7 | 0.065698801 | 0.263052344 | 0.11 | 0.032 | 1 |
| 2810049E08Rik | 0.065845514 | 0.458011567 | 0.104 | 0.032 | 1 |
| B230323A14Rik | 0.066015297 | 0.813931447 | 0.335 | 0.238 | 1 |
| Tnks2 | 0.066116563 | 0.433386648 | 0.352 | 0.238 | 1 |
| BC030336 | 0.066369488 | 0.400591821 | 0.176 | 0.079 | 1 |
| Gnl3l | 0.066536608 | -0.277583773 | 0.099 | 0.19 | 1 |
| Yod1 | 0.066723048 | -0.280935163 | 0.077 | 0.159 | 1 |
| Arf5 | 0.067180203 | 0.412952171 | 0.17 | 0.079 | 1 |
| 4932438H23Rik | 0.06728769 | 0.497545588 | 0.247 | 0.143 | 1 |
| Magi1.1 | 0.067319349 | -0.261246509 | 0.077 | 0.159 | 1 |
| Stk32a | 0.06781763 | -0.295585215 | 0.055 | 0.127 | 1 |
| Dap3 | 0.067920028 | -0.333645883 | 0.077 | 0.159 | 1 |
| Rin2 | 0.067954004 | -0.412723899 | 0.132 | 0.222 | 1 |
| Sh3gl1 | 0.068507071 | -0.262946486 | 0.055 | 0.127 | 1 |
| Tmem234 | 0.068911377 | -0.320823126 | 0.214 | 0.333 | 1 |
| Clip4 | 0.069108645 | -0.270268198 | 0.126 | 0.222 | 1 |
| Zfp207 | 0.069430799 | -0.30756573 | 0.236 | 0.365 | 1 |
| Pdzd4 | 0.069440602 | -0.280105033 | 0.088 | 0.175 | 1 |
| Cdh10 | 0.069781801 | -0.296968535 | 0.83 | 0.889 | 1 |
| Mrps5 | 0.070007505 | -0.272770471 | 0.066 | 0.143 | 1 |
| Paqr7 | 0.070088746 | -0.413853764 | 0.17 | 0.27 | 1 |
| Tbl1xr1 | 0.070355679 | 0.350437053 | 0.434 | 0.317 | 1 |
| Tspoap1 | 0.070383995 | 0.384875576 | 0.176 | 0.079 | 1 |
| Nrd1 | 0.070585459 | 0.473464857 | 0.28 | 0.175 | 1 |
| 3110021N24Rik | 0.070783522 | -0.32771918 | 0.115 | 0.206 | 1 |
| Slc12a4 | 0.071665056 | 0.338299934 | 0.104 | 0.032 | 1 |
| Fgf1 | 0.0716855 | -0.368737182 | 0.352 | 0.492 | 1 |
| Ptprn2 | 0.071866911 | -0.290206286 | 0.357 | 0.508 | 1 |
| Pogz | 0.072054616 | -0.490420728 | 0.187 | 0.286 | 1 |
| Kdm1a | 0.072123534 | 0.378794032 | 0.198 | 0.095 | 1 |
| Med13l | 0.072318032 | 0.416616783 | 0.357 | 0.254 | 1 |
| Hadhb | 0.072404188 | -0.33200946 | 0.115 | 0.206 | 1 |
| Tbc1d20 | 0.072674779 | -0.270939704 | 0.066 | 0.143 | 1 |
| Snrnp70 | 0.073007966 | 0.267389425 | 0.67 | 0.571 | 1 |
| Mlf2 | 0.073096129 | -0.349127139 | 0.17 | 0.286 | 1 |
| 1600020E01Rik | 0.073241721 | -0.279958167 | 0.099 | 0.19 | 1 |
| Adcy9 | 0.073845696 | -0.278989043 | 0.214 | 0.333 | 1 |
| Ntrk3 | 0.073850131 | -0.284899867 | 0.577 | 0.714 | 1 |
| Las1l | 0.074166891 | 0.356180191 | 0.148 | 0.063 | 1 |
| Ube4b | 0.07418457 | 0.390542726 | 0.341 | 0.222 | 1 |
| Hnrnpl | 0.074285707 | 0.391560948 | 0.33 | 0.222 | 1 |
| Rab5b | 0.074343516 | -0.377352612 | 0.143 | 0.238 | 1 |
| Usp5 | 0.074383507 | 0.32226157 | 0.104 | 0.032 | 1 |
| Pcbp2 | 0.074496435 | -0.278111761 | 0.297 | 0.429 | 1 |
| Fam213a | 0.074497073 | 0.428598883 | 0.187 | 0.095 | 1 |
| Ola1 | 0.07483671 | -0.292528899 | 0.181 | 0.302 | 1 |
| Kif1a | 0.075738935 | 0.397051797 | 0.335 | 0.206 | 1 |
| Ptpn1 | 0.075774004 | 0.338856083 | 0.104 | 0.032 | 1 |
| Mier1 | 0.07603167 | -0.285864793 | 0.302 | 0.429 | 1 |
| Mb21d2 | 0.076124922 | -0.368738283 | 0.066 | 0.143 | 1 |
| Tia1 | 0.076139004 | -0.336504741 | 0.253 | 0.381 | 1 |
| Cntnap2 | 0.076490426 | 0.363796257 | 0.731 | 0.714 | 1 |
| Rnf217 | 0.076601014 | -0.337637732 | 0.154 | 0.254 | 1 |
| Efl1 | 0.076777106 | 0.350275309 | 0.176 | 0.079 | 1 |
| Tmem222 | 0.077452056 | -0.392823445 | 0.06 | 0.127 | 1 |
| Man2a1 | 0.077537969 | 0.363574296 | 0.17 | 0.079 | 1 |
| Ttc17 | 0.077691243 | -0.321726026 | 0.264 | 0.381 | 1 |
| Myef2 | 0.077819931 | 0.44931002 | 0.17 | 0.079 | 1 |
| Pigp | 0.078144807 | -0.265358702 | 0.077 | 0.159 | 1 |
| Wdr70 | 0.078152923 | -0.276612567 | 0.192 | 0.302 | 1 |
| Prkdc | 0.078442714 | -0.355133912 | 0.203 | 0.302 | 1 |
| Dnajc13 | 0.078570439 | -0.263416555 | 0.176 | 0.286 | 1 |
| Cul3 | 0.078662195 | 0.26954884 | 0.324 | 0.19 | 1 |
| Ubxn4 | 0.078833215 | -0.315741204 | 0.165 | 0.27 | 1 |
| 2610021A01Rik | 0.078957015 | -0.37971222 | 0.06 | 0.127 | 1 |
| Nol7 | 0.078957015 | -0.316842881 | 0.06 | 0.127 | 1 |
| Frs2 | 0.079059371 | 0.372114358 | 0.264 | 0.159 | 1 |
| Slc25a17 | 0.079402245 | 0.338284956 | 0.165 | 0.079 | 1 |
| Gm26883 | 0.079601787 | -0.487737297 | 0.093 | 0.175 | 1 |
| Acvr2a | 0.07978166 | -0.278726646 | 0.115 | 0.206 | 1 |
| 1810013L24Rik | 0.079953157 | 0.366085406 | 0.275 | 0.175 | 1 |
| CT025619.2 | 0.07998359 | -0.299414353 | 0.478 | 0.635 | 1 |
| Dnajb14 | 0.080140611 | -0.354307569 | 0.104 | 0.19 | 1 |
| Lmo4 | 0.080259733 | -0.424651281 | 0.154 | 0.254 | 1 |
| Msmo1 | 0.080391754 | 0.598790685 | 0.231 | 0.143 | 1 |
| Mga | 0.080913222 | -0.252459016 | 0.286 | 0.413 | 1 |
| Unc13c | 0.081169359 | 0.56890028 | 0.258 | 0.159 | 1 |
| Tmem80 | 0.081272762 | -0.325916269 | 0.082 | 0.159 | 1 |
| Ppip5k1 | 0.08175263 | 0.415296447 | 0.165 | 0.079 | 1 |
| Yaf2 | 0.082413298 | 0.382425873 | 0.203 | 0.111 | 1 |
| Zfp287 | 0.082637039 | 0.355997542 | 0.148 | 0.063 | 1 |
| D430041D05Rik | 0.082653067 | -0.260624562 | 0.082 | 0.159 | 1 |
| Rab5a | 0.082653067 | -0.313469422 | 0.082 | 0.159 | 1 |
| Adcyap1r1 | 0.08358345 | 0.477535817 | 0.324 | 0.238 | 1 |
| Thap2 | 0.083633225 | 0.33570495 | 0.17 | 0.079 | 1 |
| Acvr1 | 0.083676891 | 0.453907112 | 0.143 | 0.063 | 1 |
| Lancl1 | 0.084052314 | -0.321639595 | 0.082 | 0.159 | 1 |
| Itpk1 | 0.084372688 | 0.344757485 | 0.187 | 0.095 | 1 |
| Actn1 | 0.084412666 | -0.311876648 | 0.06 | 0.127 | 1 |
| Ptgr2 | 0.085532529 | 0.394847481 | 0.187 | 0.095 | 1 |
| Pld2 | 0.085731253 | 0.420297182 | 0.203 | 0.111 | 1 |
| Irf2bp2 | 0.086026256 | -0.314931967 | 0.06 | 0.127 | 1 |
| Ndufb10 | 0.086026256 | -0.267436616 | 0.06 | 0.127 | 1 |
| Kank2 | 0.086187073 | -0.253642863 | 0.082 | 0.159 | 1 |
| Bmp1 | 0.086965485 | 0.386033237 | 0.143 | 0.063 | 1 |
| Btbd9 | 0.087078975 | 0.405908066 | 0.445 | 0.333 | 1 |
| Mgll | 0.087237617 | -0.343444595 | 0.335 | 0.46 | 1 |
| Galnt1 | 0.087283654 | -0.437646804 | 0.28 | 0.381 | 1 |
| Actr2 | 0.08751787 | -0.35941008 | 0.236 | 0.349 | 1 |
| Ccdc138 | 0.087850506 | 0.537122066 | 0.181 | 0.095 | 1 |
| St3gal4 | 0.088167009 | -0.251358354 | 0.753 | 0.873 | 1 |
| Efcab7 | 0.088650832 | -0.269446306 | 0.049 | 0.111 | 1 |
| Csnk2a2 | 0.088950591 | -0.366191009 | 0.148 | 0.238 | 1 |
| Dbp | 0.088955472 | 0.4323978 | 0.297 | 0.206 | 1 |
| Rsl1d1 | 0.089308204 | -0.278098152 | 0.071 | 0.143 | 1 |
| Helq | 0.089556538 | -0.281307579 | 0.049 | 0.111 | 1 |
| Rasgrp1 | 0.089597179 | 0.400191652 | 0.231 | 0.127 | 1 |
| Acss3 | 0.089628017 | 0.442599887 | 0.302 | 0.206 | 1 |
| Eif4a1 | 0.090036751 | -0.294545662 | 0.126 | 0.222 | 1 |
| Ptprg | 0.090093496 | 0.287390707 | 0.615 | 0.556 | 1 |
| Zfyve27 | 0.090169407 | -0.366792162 | 0.06 | 0.127 | 1 |
| Ehbp1 | 0.090353573 | 0.293139399 | 0.747 | 0.683 | 1 |
| Dzip1 | 0.090357626 | 0.368708865 | 0.143 | 0.063 | 1 |
| Zfp516 | 0.090617863 | -0.308755876 | 0.159 | 0.254 | 1 |
| Tmem164 | 0.090965718 | 0.346660805 | 0.687 | 0.603 | 1 |
| Bex1 | 0.091017003 | -0.274392245 | 0.06 | 0.127 | 1 |
| Tcea1 | 0.091142657 | -0.344079714 | 0.099 | 0.175 | 1 |
| Yipf3 | 0.091390298 | -0.263236076 | 0.049 | 0.111 | 1 |
| Man1a | 0.091939518 | -0.45790803 | 0.148 | 0.238 | 1 |
| Mpp5 | 0.092309761 | -0.347357708 | 0.17 | 0.27 | 1 |
| Camkv | 0.092378681 | -0.281939042 | 0.121 | 0.206 | 1 |
| Ep400 | 0.092442393 | -0.287643328 | 0.203 | 0.317 | 1 |
| Syndig1 | 0.092443491 | 0.407679365 | 0.143 | 0.063 | 1 |
| Tubb2a | 0.092453776 | -0.276991985 | 0.137 | 0.238 | 1 |
| Slc30a5 | 0.092480845 | -0.325731797 | 0.165 | 0.27 | 1 |
| Bcl6 | 0.092862116 | 0.456777552 | 0.236 | 0.143 | 1 |
| Pgrmc1 | 0.092874533 | -0.388710056 | 0.214 | 0.317 | 1 |
| Pard3 | 0.093055203 | -0.253987345 | 0.538 | 0.683 | 1 |
| Dot1l | 0.093219861 | -0.269289577 | 0.198 | 0.302 | 1 |
| Vps72 | 0.093237461 | 0.389129351 | 0.121 | 0.048 | 1 |
| Vapa | 0.093783839 | -0.274529055 | 0.159 | 0.27 | 1 |
| Lamc1 | 0.094005785 | 0.331212469 | 0.121 | 0.048 | 1 |
| Grin3a | 0.094277399 | -0.401545725 | 0.28 | 0.381 | 1 |
| Zc3h6 | 0.09456785 | 0.37208018 | 0.143 | 0.063 | 1 |
| Rims1 | 0.094631934 | 0.395944622 | 0.253 | 0.159 | 1 |
| Pou6f1 | 0.094687454 | 0.370575708 | 0.225 | 0.127 | 1 |
| Baz2a | 0.094830926 | -0.254199636 | 0.165 | 0.27 | 1 |
| Tmcc1 | 0.094842543 | -0.280415489 | 0.67 | 0.81 | 1 |
| 0610043K17Rik | 0.095284602 | 0.3375721 | 0.143 | 0.063 | 1 |
| Psmd13 | 0.095284602 | 0.358819413 | 0.143 | 0.063 | 1 |
| Trmt1l | 0.095964129 | -0.314100795 | 0.137 | 0.222 | 1 |
| Fam208b | 0.096750403 | -0.279413104 | 0.11 | 0.19 | 1 |
| Sirt2 | 0.096759772 | -0.253141592 | 0.143 | 0.238 | 1 |
| Fbxo8 | 0.097486945 | -0.369734451 | 0.088 | 0.159 | 1 |
| Zcchc7 | 0.097530335 | -0.280241258 | 0.56 | 0.73 | 1 |
| Zfp62 | 0.097923865 | 0.356493881 | 0.121 | 0.048 | 1 |
| Slain2 | 0.098322746 | -0.30869491 | 0.082 | 0.159 | 1 |
| Ddo | 0.098483141 | -0.269549687 | 0.495 | 0.635 | 1 |
| Sun1 | 0.098577907 | -0.279568913 | 0.137 | 0.222 | 1 |
| Pla2g16 | 0.099025382 | 0.313471942 | 0.17 | 0.079 | 1 |
| Mapre3 | 0.099366135 | 0.406653748 | 0.214 | 0.127 | 1 |
| Grin2c | 0.099726514 | 0.421922205 | 0.247 | 0.159 | 1 |
| Ppp3cc | 0.10012455 | 0.475794836 | 0.198 | 0.111 | 1 |
| Tshz1 | 0.101230864 | -0.27832985 | 0.121 | 0.206 | 1 |
| Wscd1 | 0.101508095 | 0.404125207 | 0.115 | 0.048 | 1 |
| Plcl1 | 0.102446689 | -0.256462285 | 0.511 | 0.635 | 1 |
| Usp53 | 0.102525451 | -0.310907575 | 0.33 | 0.444 | 1 |
| Fgfr1op2 | 0.102604814 | 0.35270416 | 0.181 | 0.095 | 1 |
| Sorcs1 | 0.102633846 | 0.485677515 | 0.187 | 0.111 | 1 |
| Dstyk | 0.102878005 | -0.292467799 | 0.159 | 0.254 | 1 |
| E2f3 | 0.10330365 | -0.269525316 | 0.143 | 0.238 | 1 |
| Myo9b | 0.103341472 | -0.363349961 | 0.132 | 0.222 | 1 |
| Cep295 | 0.103627151 | 0.31368809 | 0.121 | 0.048 | 1 |
| Prpsap2 | 0.10375867 | -0.346314102 | 0.099 | 0.175 | 1 |
| Thra | 0.103772622 | 0.374985052 | 0.368 | 0.27 | 1 |
| Cwc27 | 0.104124121 | -0.343374636 | 0.203 | 0.302 | 1 |
| Timp4 | 0.104124252 | 0.37834822 | 0.253 | 0.159 | 1 |
| Mapt | 0.104302501 | 0.344161201 | 0.451 | 0.349 | 1 |
| Nr3c1 | 0.104792269 | 0.453601887 | 0.451 | 0.349 | 1 |
| Rbm26 | 0.104869159 | -0.253084397 | 0.456 | 0.603 | 1 |
| Arl13b | 0.104891432 | 0.357171277 | 0.115 | 0.048 | 1 |
| Itga6 | 0.105471997 | -0.377687816 | 0.604 | 0.698 | 1 |
| Mt3 | 0.105538215 | -0.339831418 | 0.088 | 0.159 | 1 |
| Rbms3 | 0.105545252 | -0.359928143 | 0.214 | 0.317 | 1 |
| Psd3 | 0.106647216 | -0.278559009 | 0.643 | 0.762 | 1 |
| Ppm1k | 0.106920163 | -0.365930215 | 0.099 | 0.175 | 1 |
| Dnal1 | 0.107070289 | -0.286492794 | 0.11 | 0.19 | 1 |
| Heg1 | 0.107125485 | 0.395737306 | 0.159 | 0.079 | 1 |
| Skap2 | 0.107258512 | -0.272020164 | 0.324 | 0.444 | 1 |
| Cep78 | 0.10732066 | 0.340750178 | 0.137 | 0.063 | 1 |
| Manba | 0.107487 | 0.436192479 | 0.115 | 0.048 | 1 |
| Slc25a4 | 0.108343931 | -0.306222883 | 0.291 | 0.397 | 1 |
| Slc8b1 | 0.108672995 | 0.396173681 | 0.154 | 0.079 | 1 |
| Tspan15 | 0.108889319 | -0.417893974 | 0.137 | 0.222 | 1 |
| Fubp3 | 0.109245457 | 0.362024579 | 0.115 | 0.048 | 1 |
| Car2 | 0.110009505 | 0.340243731 | 0.203 | 0.111 | 1 |
| 6030443J06Rik | 0.110286783 | 0.311979202 | 0.214 | 0.127 | 1 |
| Lrrcc1 | 0.110567565 | 0.362989676 | 0.137 | 0.063 | 1 |
| Scn4b | 0.110905503 | 0.324552716 | 0.302 | 0.206 | 1 |
| Tango6 | 0.111050359 | -0.274960116 | 0.137 | 0.222 | 1 |
| Eif5 | 0.111050538 | -0.308754087 | 0.137 | 0.222 | 1 |
| Cbx7 | 0.111283739 | 0.419679681 | 0.132 | 0.063 | 1 |
| Fryl | 0.111470012 | -0.35293124 | 0.297 | 0.397 | 1 |
| Arel1 | 0.111507952 | -0.3220591 | 0.181 | 0.286 | 1 |
| Rbfox1 | 0.1117084 | 0.386983199 | 0.703 | 0.667 | 1 |
| Atg7 | 0.111925704 | 0.333926785 | 0.115 | 0.048 | 1 |
| Pbxip1 | 0.112267709 | 0.2792348 | 0.22 | 0.127 | 1 |
| Clk1 | 0.112520512 | 0.398058401 | 0.341 | 0.254 | 1 |
| Tac1 | 0.113912638 | -0.289215899 | 0.258 | 0.381 | 1 |
| Spopl | 0.113984676 | -0.351244718 | 0.137 | 0.222 | 1 |
| Nol4 | 0.114654567 | 0.259321787 | 0.615 | 0.587 | 1 |
| Scoc | 0.114994559 | -0.410297258 | 0.088 | 0.159 | 1 |
| Secisbp2l | 0.115070696 | 0.322911351 | 0.198 | 0.111 | 1 |
| Sorl1 | 0.115086596 | 0.367522418 | 0.346 | 0.238 | 1 |
| Alkbh8 | 0.11547446 | -0.308727233 | 0.137 | 0.222 | 1 |
| Tcerg1 | 0.115582812 | 0.311009289 | 0.137 | 0.063 | 1 |
| Pex1 | 0.116008695 | -0.267352268 | 0.099 | 0.175 | 1 |
| Frmd6 | 0.11627548 | 0.38296664 | 0.192 | 0.111 | 1 |
| Fads1 | 0.116414009 | 0.403467598 | 0.291 | 0.206 | 1 |
| Nfe2l1 | 0.116422082 | -0.261163289 | 0.159 | 0.254 | 1 |
| Fam134b | 0.116461272 | -0.336951107 | 0.165 | 0.254 | 1 |
| Tubb5 | 0.11659357 | -0.344639185 | 0.11 | 0.19 | 1 |
| Sec14l2 | 0.116863922 | -0.269459777 | 0.099 | 0.175 | 1 |
| Ywhaz | 0.117127698 | -0.46499384 | 0.346 | 0.429 | 1 |
| Usp29 | 0.117275317 | 0.53721727 | 0.132 | 0.063 | 1 |
| Atxn7l1 | 0.117523013 | 0.415281505 | 0.286 | 0.206 | 1 |
| Galnt16 | 0.117593152 | 0.410291039 | 0.407 | 0.317 | 1 |
| Pcnx4 | 0.117685987 | -0.270543977 | 0.088 | 0.159 | 1 |
| Mindy2 | 0.117759905 | 0.256453742 | 0.203 | 0.111 | 1 |
| Usp9x | 0.118319299 | -0.387751599 | 0.324 | 0.429 | 1 |
| Ptprj | 0.118323753 | -0.37942096 | 0.33 | 0.444 | 1 |
| Ryk | 0.118413232 | 0.335530217 | 0.302 | 0.206 | 1 |
| Gnai3 | 0.118888696 | 0.413546561 | 0.17 | 0.095 | 1 |
| Pipox | 0.119260747 | 0.363627418 | 0.214 | 0.127 | 1 |
| Galntl6 | 0.119813296 | 0.259789355 | 0.412 | 0.317 | 1 |
| Atp1b3 | 0.119897107 | 0.266098082 | 0.137 | 0.063 | 1 |
| Adam10 | 0.120199963 | -0.294742242 | 0.192 | 0.302 | 1 |
| Alg6 | 0.120278429 | 0.32711808 | 0.115 | 0.048 | 1 |
| Tmem110 | 0.120729679 | 0.313739153 | 0.258 | 0.159 | 1 |
| Stxbp1 | 0.12074754 | 0.442004362 | 0.203 | 0.127 | 1 |
| Lix1 | 0.120796958 | -0.344997865 | 0.28 | 0.397 | 1 |
| Nexn | 0.120811093 | 0.342064457 | 0.132 | 0.063 | 1 |
| Tbpl1 | 0.12088468 | -0.321550106 | 0.077 | 0.143 | 1 |
| Atp2b2 | 0.12140792 | 0.267913173 | 0.621 | 0.571 | 1 |
| Gm10419 | 0.121469601 | -0.27697331 | 0.066 | 0.127 | 1 |
| Calm2 | 0.121664063 | 0.348120935 | 0.621 | 0.571 | 1 |
| Esrra | 0.121864261 | 0.383356682 | 0.11 | 0.048 | 1 |
| Emsy | 0.122064745 | -0.268213178 | 0.225 | 0.333 | 1 |
| Prdm10 | 0.122101406 | -0.300208809 | 0.099 | 0.175 | 1 |
| Morf4l1 | 0.12236876 | -0.252245238 | 0.137 | 0.222 | 1 |
| Shisa4 | 0.122686381 | 0.38648828 | 0.297 | 0.19 | 1 |
| Cd302 | 0.122879327 | -0.308316725 | 0.055 | 0.111 | 1 |
| Fam184a | 0.122885424 | 0.436120415 | 0.412 | 0.333 | 1 |
| Vps4b | 0.123166494 | 0.436632211 | 0.154 | 0.079 | 1 |
| Nom1 | 0.123168628 | 0.281637635 | 0.115 | 0.048 | 1 |
| A830019P07Rik | 0.123675987 | 0.501759467 | 0.209 | 0.127 | 1 |
| Anapc1 | 0.123700362 | 0.42984259 | 0.203 | 0.127 | 1 |
| Slc20a2 | 0.124100239 | 0.463885743 | 0.253 | 0.175 | 1 |
| Gad1 | 0.124349913 | -0.307586013 | 0.143 | 0.222 | 1 |
| Rab3ip | 0.124635891 | -0.302387153 | 0.066 | 0.127 | 1 |
| Klhl12 | 0.124841177 | 0.559843605 | 0.11 | 0.048 | 1 |
| Nfic | 0.12490636 | -0.277642978 | 0.17 | 0.27 | 1 |
| Vbp1 | 0.125168603 | -0.296813944 | 0.055 | 0.111 | 1 |
| Hacd1 | 0.12524014 | 0.293380192 | 0.137 | 0.063 | 1 |
| Camk2n1 | 0.125317136 | 0.368490994 | 0.374 | 0.286 | 1 |
| Notch1 | 0.125457581 | -0.283193239 | 0.28 | 0.413 | 1 |
| Agrp | 0.125705507 | -0.312034464 | 0.066 | 0.127 | 1 |
| Trpc4ap | 0.125915493 | 0.324737109 | 0.231 | 0.143 | 1 |
| Mroh1 | 0.126325641 | -0.272625639 | 0.055 | 0.111 | 1 |
| Dnajc19 | 0.126376558 | -0.264909607 | 0.17 | 0.27 | 1 |
| Pcdh11x | 0.126622732 | -0.488935802 | 0.489 | 0.603 | 1 |
| Pcx | 0.12678562 | 0.439812082 | 0.462 | 0.397 | 1 |
| Nup98 | 0.127037793 | 0.438083438 | 0.28 | 0.206 | 1 |
| Osbpl11 | 0.127359842 | 0.368777544 | 0.231 | 0.143 | 1 |
| Pdss2 | 0.12747695 | 0.462355895 | 0.33 | 0.238 | 1 |
| Clasp2 | 0.127601654 | 0.296304066 | 0.758 | 0.825 | 1 |
| Nek7 | 0.127706354 | -0.355343633 | 0.231 | 0.317 | 1 |
| Gm6277 | 0.127929094 | -0.515115242 | 0.126 | 0.206 | 1 |
| Por | 0.128169448 | 0.331025135 | 0.209 | 0.127 | 1 |
| Magi3 | 0.128332497 | -0.288219637 | 0.192 | 0.286 | 1 |
| Miga2 | 0.129580604 | -0.293342185 | 0.137 | 0.222 | 1 |
| Olfm3 | 0.130015565 | 0.321960428 | 0.132 | 0.063 | 1 |
| Cbarp | 0.130462595 | 0.35967309 | 0.209 | 0.127 | 1 |
| Rer1 | 0.131161208 | -0.311159504 | 0.066 | 0.127 | 1 |
| Rrp1 | 0.131319039 | -0.295971375 | 0.126 | 0.206 | 1 |
| Tns1 | 0.131621895 | 0.37928288 | 0.209 | 0.127 | 1 |
| Slc30a9 | 0.131770146 | -0.289458237 | 0.214 | 0.317 | 1 |
| Kif1bp | 0.13217726 | 0.409953578 | 0.165 | 0.095 | 1 |
| Hacd2 | 0.132369013 | -0.274317426 | 0.434 | 0.556 | 1 |
| Copg2 | 0.132539622 | 0.309414364 | 0.308 | 0.206 | 1 |
| Folh1 | 0.132723749 | -0.356022163 | 0.291 | 0.381 | 1 |
| Pigu | 0.132880509 | 0.398081982 | 0.132 | 0.063 | 1 |
| Mrpl33 | 0.132963431 | 0.352558672 | 0.126 | 0.063 | 1 |
| Ctps2 | 0.134113056 | 0.34085545 | 0.11 | 0.048 | 1 |
| Nim1k | 0.134266164 | -0.274977975 | 0.401 | 0.556 | 1 |
| Phax | 0.134554944 | 0.252480512 | 0.137 | 0.063 | 1 |
| Phf21b | 0.134695542 | 0.287094391 | 0.368 | 0.286 | 1 |
| Ppp4r4 | 0.134817462 | 0.300720072 | 0.132 | 0.063 | 1 |
| Palld | 0.136469886 | -0.250144404 | 0.275 | 0.381 | 1 |
| Mphosph9 | 0.136533688 | 0.518864304 | 0.165 | 0.095 | 1 |
| Mettl15 | 0.136690375 | -0.275161662 | 0.137 | 0.222 | 1 |
| Col23a1 | 0.136798743 | -0.253478848 | 0.066 | 0.127 | 1 |
| 4930517O19Rik | 0.136866317 | -0.342757101 | 0.236 | 0.317 | 1 |
| Arfgap2 | 0.137278754 | 0.27912369 | 0.154 | 0.079 | 1 |
| Ablim2 | 0.137278754 | 0.361144351 | 0.154 | 0.079 | 1 |
| Eif2s3x | 0.138400939 | 0.298508537 | 0.11 | 0.048 | 1 |
| Rab6a | 0.138740294 | -0.270613432 | 0.236 | 0.333 | 1 |
| Kyat3 | 0.13948924 | 0.339604954 | 0.11 | 0.048 | 1 |
| Nxpe2 | 0.13948924 | 0.353462464 | 0.11 | 0.048 | 1 |
| Cnrip1 | 0.139592204 | -0.257336702 | 0.115 | 0.19 | 1 |
| Thy1 | 0.139821556 | -0.324009708 | 0.176 | 0.254 | 1 |
| Ap4s1 | 0.139899651 | -0.254716662 | 0.104 | 0.175 | 1 |
| Elmo1 | 0.140259381 | 0.396214236 | 0.22 | 0.143 | 1 |
| Ankhd1 | 0.140629558 | 0.432552071 | 0.484 | 0.413 | 1 |
| Ugt8a | 0.140976618 | 0.407939513 | 0.126 | 0.063 | 1 |
| Enpp5 | 0.14144733 | 0.37985792 | 0.187 | 0.111 | 1 |
| Tns3 | 0.14173323 | -0.341826219 | 0.187 | 0.27 | 1 |
| Anapc16 | 0.141785521 | 0.300304882 | 0.203 | 0.127 | 1 |
| Plekha6 | 0.141876976 | 0.330474464 | 0.187 | 0.111 | 1 |
| Atp6v0e | 0.141915368 | -0.317882149 | 0.159 | 0.238 | 1 |
| Btbd11 | 0.142793682 | 0.310447548 | 0.11 | 0.048 | 1 |
| Hmox2 | 0.142793682 | 0.283215384 | 0.11 | 0.048 | 1 |
| Acp1 | 0.142881299 | 0.298912753 | 0.154 | 0.079 | 1 |
| Atp9b | 0.143757896 | 0.369992902 | 0.396 | 0.302 | 1 |
| Asap2 | 0.143889843 | 0.302907273 | 0.346 | 0.27 | 1 |
| Trappc13 | 0.143908412 | 0.293655378 | 0.11 | 0.048 | 1 |
| Eci2 | 0.144783525 | 0.301389998 | 0.269 | 0.175 | 1 |
| Prtg | 0.145249953 | 0.415723103 | 0.148 | 0.079 | 1 |
| Cpq | 0.145358051 | 0.28903154 | 0.61 | 0.571 | 1 |
| Ppp1r9a | 0.145553808 | 0.293704332 | 0.659 | 0.571 | 1 |
| Srp72 | 0.145790987 | 0.356494271 | 0.187 | 0.111 | 1 |
| Bhlhe40 | 0.145910323 | 0.447588348 | 0.214 | 0.143 | 1 |
| Sh3gl2 | 0.146620836 | 0.309682927 | 0.242 | 0.159 | 1 |
| Zfp266 | 0.146620836 | -0.255994039 | 0.198 | 0.286 | 1 |
| Tbc1d9b | 0.14667569 | 0.296585379 | 0.269 | 0.175 | 1 |
| Rev1 | 0.146695285 | 0.399975492 | 0.247 | 0.175 | 1 |
| Pikfyve | 0.147470078 | -0.335775703 | 0.203 | 0.286 | 1 |
| Clcn4 | 0.14784489 | -0.283694092 | 0.104 | 0.175 | 1 |
| 2610008E11Rik | 0.148288231 | -0.303241314 | 0.093 | 0.159 | 1 |
| Wbp2 | 0.148288231 | -0.28752258 | 0.093 | 0.159 | 1 |
| Usp54 | 0.148425005 | -0.263969455 | 0.357 | 0.476 | 1 |
| Mro | 0.148614065 | 0.35553395 | 0.286 | 0.206 | 1 |
| Tmem65 | 0.150177659 | 0.269204901 | 0.148 | 0.079 | 1 |
| Pkm | 0.150292471 | 0.394079811 | 0.341 | 0.254 | 1 |
| Yipf5 | 0.150912037 | -0.305307035 | 0.104 | 0.175 | 1 |
| Nsf | 0.150989061 | 0.318636465 | 0.374 | 0.286 | 1 |
| Ankrd13c | 0.151346353 | 0.358957315 | 0.198 | 0.127 | 1 |
| Garnl3 | 0.15155221 | -0.367355716 | 0.06 | 0.111 | 1 |
| Mtmr10 | 0.151589292 | -0.280664155 | 0.148 | 0.222 | 1 |
| Gm13031 | 0.151622864 | 0.395982061 | 0.143 | 0.079 | 1 |
| Cables1 | 0.151699824 | -0.299188133 | 0.709 | 0.81 | 1 |
| Sqstm1 | 0.151994688 | 0.341721343 | 0.203 | 0.127 | 1 |
| Nsd2 | 0.152002431 | -0.406278771 | 0.242 | 0.333 | 1 |
| Dnajc10 | 0.152042702 | 0.360567592 | 0.187 | 0.111 | 1 |
| Zc3h12b | 0.152128419 | 0.263282469 | 0.39 | 0.286 | 1 |
| Flrt3 | 0.152594414 | -0.264922472 | 0.093 | 0.159 | 1 |
| Kcnq5 | 0.153173894 | -0.282089084 | 0.582 | 0.651 | 1 |
| Scaf11 | 0.153251198 | 0.2590465 | 0.269 | 0.175 | 1 |
| Tsc22d2 | 0.153483926 | -0.278342646 | 0.231 | 0.317 | 1 |
| Magt1 | 0.153685685 | 0.308901912 | 0.126 | 0.063 | 1 |
| Vps9d1 | 0.155494824 | 0.305226198 | 0.104 | 0.048 | 1 |
| Akap13 | 0.155650731 | -0.376725608 | 0.253 | 0.333 | 1 |
| Hp1bp3 | 0.155664447 | -0.29938427 | 0.17 | 0.254 | 1 |
| Cacna2d1 | 0.155855779 | 0.430928859 | 0.258 | 0.19 | 1 |
| Apc2 | 0.156458226 | 0.291776629 | 0.17 | 0.095 | 1 |
| Tef | 0.156582369 | 0.384636062 | 0.473 | 0.413 | 1 |
| Pank1 | 0.156952745 | 0.320390845 | 0.209 | 0.127 | 1 |
| Stxbp6 | 0.158303614 | -0.281922235 | 0.17 | 0.254 | 1 |
| Srsf10 | 0.158500497 | -0.255340233 | 0.159 | 0.238 | 1 |
| Tmed7 | 0.158845639 | 0.30837758 | 0.148 | 0.079 | 1 |
| Pign | 0.158858864 | 0.320373305 | 0.242 | 0.159 | 1 |
| Rasgef1b | 0.158887054 | 0.314167351 | 0.143 | 0.079 | 1 |
| Phf12 | 0.159009941 | 0.36825858 | 0.286 | 0.19 | 1 |
| Xrcc4 | 0.159082163 | -0.442817476 | 0.385 | 0.444 | 1 |
| Fam19a2 | 0.159157729 | 0.314485029 | 0.104 | 0.048 | 1 |
| Pebp1 | 0.159300784 | -0.263799626 | 0.214 | 0.302 | 1 |
| Mal | 0.159412425 | 0.422444094 | 0.198 | 0.127 | 1 |
| Slc25a5 | 0.160081791 | -0.407394457 | 0.17 | 0.254 | 1 |
| Aplp1 | 0.160092915 | 0.286841646 | 0.434 | 0.349 | 1 |
| Ust | 0.160393095 | 0.443068294 | 0.104 | 0.048 | 1 |
| Cyp4f13 | 0.16041412 | 0.310472231 | 0.148 | 0.079 | 1 |
| Ndrg2 | 0.161253355 | 0.321262876 | 0.703 | 0.714 | 1 |
| Lias | 0.161491334 | 0.289709582 | 0.126 | 0.063 | 1 |
| Slc25a42 | 0.161491334 | 0.322900589 | 0.126 | 0.063 | 1 |
| Yipf1 | 0.162079721 | -0.331283818 | 0.11 | 0.175 | 1 |
| Selenoi | 0.162079721 | -0.304034764 | 0.11 | 0.175 | 1 |
| Map1lc3a | 0.162885549 | 0.291352034 | 0.104 | 0.048 | 1 |
| Ezh2 | 0.163003799 | 0.30712015 | 0.165 | 0.095 | 1 |
| Fam234b | 0.16313773 | 0.48756792 | 0.214 | 0.143 | 1 |
| Hibch | 0.163582914 | 0.263291675 | 0.192 | 0.111 | 1 |
| Ap3b2 | 0.164234911 | 0.310329523 | 0.143 | 0.079 | 1 |
| Khdrbs3 | 0.164234911 | 0.356321548 | 0.143 | 0.079 | 1 |
| Pdzd2 | 0.164729096 | 0.394530704 | 0.181 | 0.111 | 1 |
| Evi5 | 0.165398616 | -0.355561953 | 0.225 | 0.302 | 1 |
| Snap25 | 0.165420165 | -0.409282752 | 0.478 | 0.556 | 1 |
| Plcl2 | 0.16553153 | 0.308412591 | 0.203 | 0.127 | 1 |
| St5 | 0.166184696 | -0.267659111 | 0.209 | 0.302 | 1 |
| Desi2 | 0.167001091 | -0.268786234 | 0.56 | 0.698 | 1 |
| Grm7 | 0.167173749 | 0.264914095 | 0.516 | 0.46 | 1 |
| Lrrtm4 | 0.167378015 | 0.300636604 | 0.599 | 0.492 | 1 |
| Unc5d | 0.167708563 | 0.347898336 | 0.159 | 0.095 | 1 |
| Ube3a | 0.168076214 | 0.442594009 | 0.423 | 0.365 | 1 |
| Ptprf | 0.168112921 | 0.310375885 | 0.165 | 0.095 | 1 |
| Pcyt2 | 0.16841657 | 0.373099074 | 0.346 | 0.27 | 1 |
| Rsbn1 | 0.168756583 | -0.326444438 | 0.209 | 0.302 | 1 |
| Daam1 | 0.169003896 | 0.285197799 | 0.467 | 0.397 | 1 |
| Tmem63b | 0.169764727 | -0.294968441 | 0.165 | 0.238 | 1 |
| Selenot | 0.1701899 | 0.297225743 | 0.165 | 0.095 | 1 |
| Zfp131 | 0.171388155 | 0.339995481 | 0.143 | 0.079 | 1 |
| Taok1 | 0.17160841 | -0.280518227 | 0.451 | 0.54 | 1 |
| Cd46 | 0.171771088 | 0.373793461 | 0.269 | 0.19 | 1 |
| Adamts3 | 0.171839374 | 0.264934627 | 0.104 | 0.048 | 1 |
| Fam91a1 | 0.171839374 | 0.260099054 | 0.104 | 0.048 | 1 |
| Sertad2 | 0.17197751 | 0.376314173 | 0.368 | 0.302 | 1 |
| Sec16a | 0.17227391 | 0.273235436 | 0.148 | 0.079 | 1 |
| 6430573F11Rik | 0.172369351 | -0.314845555 | 0.198 | 0.27 | 1 |
| Bcar3 | 0.172410106 | 0.375605901 | 0.313 | 0.238 | 1 |
| Gdpd2 | 0.173147995 | 0.272706944 | 0.104 | 0.048 | 1 |
| Zfp808 | 0.173147995 | 0.307928045 | 0.104 | 0.048 | 1 |
| E130114P18Rik | 0.173395354 | -0.296347166 | 0.247 | 0.333 | 1 |
| Sez6l | 0.173478044 | -0.375949632 | 0.06 | 0.111 | 1 |
| Gm37494 | 0.173571653 | 0.349312069 | 0.198 | 0.127 | 1 |
| Khsrp | 0.174201022 | 0.312531765 | 0.143 | 0.079 | 1 |
| Cerk | 0.17435624 | 0.326354727 | 0.126 | 0.063 | 1 |
| Nxn | 0.174505503 | 0.391925263 | 0.577 | 0.508 | 1 |
| Cdh22 | 0.174547994 | 0.375316356 | 0.198 | 0.127 | 1 |
| Ldlr | 0.174688586 | 0.373674087 | 0.181 | 0.111 | 1 |
| Extl3 | 0.174698499 | 0.458892715 | 0.379 | 0.349 | 1 |
| Ep300 | 0.174842867 | -0.256523643 | 0.253 | 0.333 | 1 |
| Zfp467 | 0.174923296 | -0.259953556 | 0.06 | 0.111 | 1 |
| Sra1 | 0.17536078 | -0.381872622 | 0.071 | 0.127 | 1 |
| Srsf5 | 0.175695818 | 0.395153357 | 0.385 | 0.349 | 1 |
| E430024P14Rik | 0.175787564 | 0.291662271 | 0.104 | 0.048 | 1 |
| Tprkb | 0.176347369 | 0.391097478 | 0.615 | 0.587 | 1 |
| Naa35 | 0.176536195 | 0.266876263 | 0.165 | 0.095 | 1 |
| Srbd1 | 0.176776062 | 0.268860426 | 0.126 | 0.063 | 1 |
| Rnf185 | 0.177499872 | 0.340709109 | 0.121 | 0.063 | 1 |
| Ptma | 0.177806676 | -0.278139852 | 0.209 | 0.286 | 1 |
| Ggps1 | 0.177990442 | 0.331926807 | 0.214 | 0.143 | 1 |
| Nmnat2 | 0.177990627 | 0.401536885 | 0.214 | 0.143 | 1 |
| Itch | 0.178293949 | -0.255064368 | 0.423 | 0.524 | 1 |
| Prkcd | 0.179803016 | 0.265520455 | 0.104 | 0.048 | 1 |
| March1 | 0.181069087 | -0.306033426 | 0.137 | 0.206 | 1 |
| Knop1 | 0.181091696 | 0.274561185 | 0.143 | 0.079 | 1 |
| Chsy3 | 0.181497457 | -0.256106604 | 0.159 | 0.238 | 1 |
| Pdcd6 | 0.182520859 | -0.35331694 | 0.088 | 0.143 | 1 |
| Gmps | 0.182608711 | 0.38174432 | 0.176 | 0.111 | 1 |
| Kdm2a | 0.182639775 | -0.300733832 | 0.341 | 0.429 | 1 |
| Fbxo34 | 0.182933427 | 0.276224373 | 0.126 | 0.063 | 1 |
| Rasa1 | 0.184642241 | 0.353936799 | 0.291 | 0.222 | 1 |
| Tob2 | 0.185057446 | 0.376545654 | 0.121 | 0.063 | 1 |
| A330093E20Rik | 0.18562973 | -0.278835765 | 0.099 | 0.159 | 1 |
| Slc13a5 | 0.185796339 | 0.258970941 | 0.143 | 0.079 | 1 |
| Disp1 | 0.18633985 | 0.29141881 | 0.121 | 0.063 | 1 |
| Ganab | 0.18633985 | 0.315151574 | 0.121 | 0.063 | 1 |
| Ube2h | 0.186585929 | 0.261591305 | 0.462 | 0.397 | 1 |
| mt-Atp6 | 0.187225318 | -0.392246051 | 0.654 | 0.762 | 1 |
| Phf20l1 | 0.187467319 | -0.266909325 | 0.407 | 0.54 | 1 |
| Aida | 0.187913973 | 0.37670904 | 0.137 | 0.079 | 1 |
| Macrod1 | 0.189114732 | -0.277310852 | 0.253 | 0.349 | 1 |
| Spats2 | 0.190354793 | -0.252273157 | 0.104 | 0.175 | 1 |
| Pigk | 0.190730679 | 0.279692543 | 0.159 | 0.095 | 1 |
| Cdk14 | 0.190846818 | -0.272176075 | 0.5 | 0.619 | 1 |
| Psmd7 | 0.192364374 | -0.285590489 | 0.143 | 0.206 | 1 |
| Zfp704 | 0.192850484 | 0.27108294 | 0.121 | 0.063 | 1 |
| Dpf2 | 0.193045749 | -0.390804075 | 0.088 | 0.143 | 1 |
| Sybu | 0.193977736 | -0.272193634 | 0.467 | 0.571 | 1 |
| Lnpep | 0.194023981 | -0.364075344 | 0.297 | 0.381 | 1 |
| Mlh3 | 0.194059678 | 0.410636493 | 0.137 | 0.079 | 1 |
| Nhlrc2 | 0.194319536 | 0.323349451 | 0.165 | 0.095 | 1 |
| Ccdc88c | 0.194390374 | 0.358163367 | 0.291 | 0.222 | 1 |
| Rbx1 | 0.19632675 | 0.368296495 | 0.154 | 0.095 | 1 |
| 4931406C07Rik | 0.196484225 | 0.372458247 | 0.17 | 0.111 | 1 |
| Med12l | 0.196491466 | -0.280001618 | 0.412 | 0.508 | 1 |
| Hip1r | 0.196640997 | -0.293181063 | 0.148 | 0.222 | 1 |
| Rngtt | 0.196854767 | -0.270216546 | 0.269 | 0.381 | 1 |
| Cd9 | 0.197045524 | -0.309398075 | 0.099 | 0.159 | 1 |
| Scrn1 | 0.197076808 | 0.261269542 | 0.198 | 0.127 | 1 |
| Cd81 | 0.197102493 | -0.361688493 | 0.401 | 0.508 | 1 |
| Ppt1 | 0.197817221 | 0.325488512 | 0.137 | 0.079 | 1 |
| Zfp236 | 0.197943324 | 0.257332326 | 0.214 | 0.143 | 1 |
| Kdm4c | 0.198270381 | 0.361354996 | 0.385 | 0.317 | 1 |
| Gm14296 | 0.199081489 | 0.304651734 | 0.137 | 0.079 | 1 |
| Zfp771 | 0.199526741 | 0.251935987 | 0.121 | 0.063 | 1 |
| Ide | 0.199909016 | -0.254677736 | 0.137 | 0.206 | 1 |
| 1110019D14Rik | 0.200088254 | -0.33798269 | 0.297 | 0.381 | 1 |
| Zfp608 | 0.200256827 | 0.342159402 | 0.676 | 0.746 | 1 |
| Mkl2 | 0.20064388 | -0.254190524 | 0.324 | 0.413 | 1 |
| Smdt1 | 0.201227247 | -0.272535256 | 0.088 | 0.143 | 1 |
| Slc15a2 | 0.202122814 | 0.286863438 | 0.214 | 0.143 | 1 |
| Zfp64 | 0.202909705 | 0.312923849 | 0.137 | 0.079 | 1 |
| Lrp8 | 0.203612691 | 0.261913262 | 0.121 | 0.063 | 1 |
| Angel2 | 0.203647141 | 0.287329845 | 0.176 | 0.111 | 1 |
| Kctd8 | 0.203650112 | 0.30718313 | 0.209 | 0.143 | 1 |
| Kcnip2 | 0.204245283 | -0.253572705 | 0.11 | 0.175 | 1 |
| Kif5c | 0.204801626 | 0.307920762 | 0.176 | 0.111 | 1 |
| Gsg1l | 0.205491465 | 0.309669961 | 0.137 | 0.079 | 1 |
| Srcin1 | 0.205491465 | 0.308934781 | 0.137 | 0.079 | 1 |
| Scg3 | 0.205640938 | -0.311465849 | 0.28 | 0.365 | 1 |
| Capza1 | 0.205793411 | 0.317656653 | 0.209 | 0.143 | 1 |
| Rab34 | 0.206178439 | 0.257947768 | 0.264 | 0.19 | 1 |
| Tmc7 | 0.206390928 | 0.2567735 | 0.445 | 0.381 | 1 |
| Trappc12 | 0.207321222 | 0.317459548 | 0.159 | 0.095 | 1 |
| Pigs | 0.208414011 | 0.257646254 | 0.181 | 0.111 | 1 |
| Eif4g1 | 0.209235547 | 0.325962637 | 0.291 | 0.222 | 1 |
| Rab22a | 0.209408739 | 0.29888442 | 0.137 | 0.079 | 1 |
| Rbm6 | 0.209604335 | -0.372952748 | 0.478 | 0.556 | 1 |
| Atp6v1h | 0.209895841 | 0.304403079 | 0.335 | 0.27 | 1 |
| Tor1aip2 | 0.210490973 | -0.333284641 | 0.115 | 0.175 | 1 |
| Nphp3 | 0.210611931 | 0.313389904 | 0.132 | 0.079 | 1 |
| Acyp2 | 0.210839549 | 0.492244334 | 0.396 | 0.365 | 1 |
| Gm26691 | 0.211561345 | -0.264352843 | 0.242 | 0.333 | 1 |
| Rnf111 | 0.211682973 | -0.271637071 | 0.181 | 0.254 | 1 |
| Kcnd3 | 0.211776971 | -0.324416616 | 0.115 | 0.175 | 1 |
| 8030462N17Rik | 0.211915803 | 0.261006947 | 0.198 | 0.127 | 1 |
| Sipa1l3 | 0.212531111 | 0.350188738 | 0.242 | 0.175 | 1 |
| Gpr107 | 0.21276496 | -0.30830849 | 0.181 | 0.254 | 1 |
| Crlf3 | 0.21285091 | -0.369584459 | 0.401 | 0.476 | 1 |
| Hsd17b4 | 0.213068638 | -0.259779717 | 0.115 | 0.175 | 1 |
| Cacna2d3 | 0.213085955 | -0.258091697 | 0.368 | 0.508 | 1 |
| Nktr | 0.213164693 | -0.265844548 | 0.401 | 0.492 | 1 |
| Ulk2 | 0.21329406 | -0.304443568 | 0.236 | 0.317 | 1 |
| Capn2 | 0.213462079 | -0.2553087 | 0.297 | 0.365 | 1 |
| Map4k4 | 0.213462312 | 0.296199127 | 0.478 | 0.413 | 1 |
| Nav3 | 0.214199052 | 0.359380693 | 0.637 | 0.571 | 1 |
| Rfwd3 | 0.215625889 | -0.401057255 | 0.159 | 0.222 | 1 |
| Mapk8ip3 | 0.216655411 | 0.3684406 | 0.236 | 0.175 | 1 |
| Armc1 | 0.216977739 | -0.295056807 | 0.115 | 0.175 | 1 |
| Lair1 | 0.217813314 | 0.272993626 | 0.176 | 0.111 | 1 |
| Styx | 0.218525742 | 0.308116416 | 0.159 | 0.095 | 1 |
| Tardbp | 0.218787119 | 0.361209345 | 0.214 | 0.159 | 1 |
| Dst | 0.218960515 | 0.336650799 | 0.544 | 0.524 | 1 |
| Dab1 | 0.219361776 | 0.282573331 | 0.522 | 0.444 | 1 |
| Pds5a | 0.22119924 | -0.266686926 | 0.286 | 0.365 | 1 |
| Atp5g3 | 0.22144902 | -0.345086758 | 0.148 | 0.206 | 1 |
| Nf1 | 0.221827445 | 0.262365878 | 0.67 | 0.667 | 1 |
| Stat3 | 0.221847524 | -0.302726239 | 0.17 | 0.238 | 1 |
| Mbp | 0.221957787 | 0.377048672 | 0.247 | 0.175 | 1 |
| Mpv17 | 0.222037095 | 0.273604401 | 0.115 | 0.063 | 1 |
| Scn2b | 0.22218326 | -0.267713693 | 0.077 | 0.127 | 1 |
| Itgb5 | 0.223249467 | 0.297953409 | 0.225 | 0.159 | 1 |
| Snw1 | 0.223527077 | 0.27935331 | 0.115 | 0.063 | 1 |
| Pde1c | 0.223544286 | 0.299857673 | 0.137 | 0.079 | 1 |
| Cacnb2 | 0.22378449 | -0.273872214 | 0.346 | 0.413 | 1 |
| Gpld1 | 0.225668859 | 0.285887271 | 0.533 | 0.492 | 1 |
| Cotl1 | 0.226435325 | -0.320022925 | 0.093 | 0.143 | 1 |
| Zfp438 | 0.226985173 | 0.386579717 | 0.275 | 0.222 | 1 |
| Pspc1 | 0.228533453 | 0.387504926 | 0.28 | 0.222 | 1 |
| Epm2a | 0.229013936 | -0.259269257 | 0.115 | 0.175 | 1 |
| Rac1 | 0.229553898 | -0.476834904 | 0.154 | 0.222 | 1 |
| Dvl1 | 0.229558498 | 0.264765022 | 0.115 | 0.063 | 1 |
| Rnf138 | 0.23036153 | 0.26829748 | 0.154 | 0.095 | 1 |
| Add3 | 0.230991069 | 0.363851754 | 0.478 | 0.429 | 1 |
| Nkx2-2 | 0.23108428 | 0.380037567 | 0.115 | 0.063 | 1 |
| Rcor3 | 0.231115164 | -0.288630162 | 0.121 | 0.175 | 1 |
| Ghr | 0.231478488 | -0.388886866 | 0.599 | 0.667 | 1 |
| Gpc4 | 0.232415828 | -0.262594857 | 0.066 | 0.111 | 1 |
| Dpp8 | 0.232940212 | -0.275412602 | 0.203 | 0.27 | 1 |
| Tmtc1 | 0.23296745 | 0.460962723 | 0.198 | 0.143 | 1 |
| Pak2 | 0.23296745 | 0.421316668 | 0.198 | 0.143 | 1 |
| Cask | 0.234383798 | -0.294614163 | 0.363 | 0.429 | 1 |
| Slc16a6 | 0.234517941 | 0.310545306 | 0.148 | 0.095 | 1 |
| Stk39 | 0.23470492 | -0.301064593 | 0.17 | 0.238 | 1 |
| Rnf10 | 0.235447661 | -0.314190427 | 0.093 | 0.143 | 1 |
| Pfkm | 0.235621129 | -0.315514677 | 0.22 | 0.286 | 1 |
| Prkaca | 0.235738566 | 0.255000169 | 0.132 | 0.079 | 1 |
| Faf2 | 0.236576282 | 0.375759466 | 0.17 | 0.111 | 1 |
| Sh3rf1 | 0.236861445 | 0.356504957 | 0.236 | 0.175 | 1 |
| Npy | 0.237675702 | -0.296235831 | 0.066 | 0.111 | 1 |
| Fggy | 0.238605207 | 0.272208565 | 0.302 | 0.238 | 1 |
| Rnf19a | 0.238647924 | 0.271880205 | 0.148 | 0.095 | 1 |
| Vezt | 0.239345149 | 0.401720893 | 0.302 | 0.254 | 1 |
| Adcy5 | 0.239375415 | -0.299576844 | 0.264 | 0.333 | 1 |
| Gtdc1 | 0.240022019 | 0.418995025 | 0.253 | 0.19 | 1 |
| Cep250 | 0.241429604 | 0.296430678 | 0.148 | 0.095 | 1 |
| Asic2 | 0.241579966 | 0.251332449 | 0.714 | 0.683 | 1 |
| Slc25a12 | 0.242366565 | 0.37291182 | 0.418 | 0.397 | 1 |
| Stk38 | 0.242940916 | 0.32616605 | 0.286 | 0.238 | 1 |
| Brk1 | 0.24382301 | -0.276415565 | 0.104 | 0.159 | 1 |
| Ubr1 | 0.243839999 | 0.418997373 | 0.275 | 0.222 | 1 |
| Syn1 | 0.244567501 | 0.336870866 | 0.132 | 0.079 | 1 |
| Sox8 | 0.245366346 | 0.254501522 | 0.154 | 0.095 | 1 |
| Palm | 0.245644788 | 0.33439109 | 0.148 | 0.095 | 1 |
| Zcchc18 | 0.245896985 | 0.390538663 | 0.214 | 0.159 | 1 |
| Atxn7 | 0.246051675 | 0.254645956 | 0.385 | 0.317 | 1 |
| Chst1 | 0.246195078 | 0.250298757 | 0.247 | 0.175 | 1 |
| Ctnna3 | 0.246352305 | -0.26114736 | 0.121 | 0.175 | 1 |
| Gde1 | 0.246889346 | 0.350490351 | 0.181 | 0.127 | 1 |
| Phtf1 | 0.24756675 | 0.275187082 | 0.242 | 0.175 | 1 |
| Msl2 | 0.247854817 | -0.297008727 | 0.093 | 0.143 | 1 |
| Cyp4f15 | 0.248339985 | 0.272616094 | 0.187 | 0.127 | 1 |
| Arhgap12 | 0.249922801 | 0.392005979 | 0.308 | 0.254 | 1 |
| Gpsm1 | 0.250263983 | 0.300145008 | 0.11 | 0.063 | 1 |
| Acadl | 0.251339768 | -0.291875414 | 0.104 | 0.159 | 1 |
| Hectd4 | 0.251664736 | 0.308594461 | 0.319 | 0.254 | 1 |
| Slco1c1 | 0.25202886 | 0.327329395 | 0.385 | 0.349 | 1 |
| Zfp462 | 0.252926387 | 0.317601019 | 0.423 | 0.365 | 1 |
| Sipa1l1 | 0.253604775 | -0.280304367 | 0.203 | 0.27 | 1 |
| Inppl1 | 0.254009646 | 0.358235726 | 0.126 | 0.079 | 1 |
| Ano6 | 0.254390663 | 0.265437578 | 0.132 | 0.079 | 1 |
| Prdm16 | 0.254888691 | -0.266063439 | 0.44 | 0.524 | 1 |
| Lrfn5 | 0.255235309 | 0.375530781 | 0.308 | 0.254 | 1 |
| Eefsec | 0.255240983 | 0.281140946 | 0.11 | 0.063 | 1 |
| Slc9a7 | 0.258596968 | 0.298524095 | 0.11 | 0.063 | 1 |
| Micu2 | 0.258599008 | 0.27992435 | 0.148 | 0.095 | 1 |
| Phkg1 | 0.258679144 | 0.270431801 | 0.67 | 0.683 | 1 |
| Kmt2b | 0.260712473 | -0.270100736 | 0.093 | 0.143 | 1 |
| Rnf115 | 0.260954743 | -0.365128852 | 0.176 | 0.238 | 1 |
| Pkia | 0.261650744 | 0.31224559 | 0.198 | 0.143 | 1 |
| Sos2 | 0.261759184 | 0.337152435 | 0.319 | 0.27 | 1 |
| Ubxn2a | 0.261910324 | 0.437787047 | 0.143 | 0.095 | 1 |
| Setdb1 | 0.263411146 | 0.371246072 | 0.143 | 0.095 | 1 |
| Cnot7 | 0.263446328 | -0.2662819 | 0.154 | 0.206 | 1 |
| Zfp949 | 0.263688077 | 0.282909709 | 0.11 | 0.063 | 1 |
| Enox1 | 0.263748964 | 0.471044701 | 0.242 | 0.19 | 1 |
| Prrx1 | 0.264055094 | -0.281930792 | 0.429 | 0.492 | 1 |
| Nr1d2 | 0.264957434 | 0.372034522 | 0.374 | 0.333 | 1 |
| Adipor1 | 0.265400376 | 0.265253773 | 0.11 | 0.063 | 1 |
| Dlg1 | 0.265432985 | -0.314283644 | 0.401 | 0.444 | 1 |
| Rps6ka5 | 0.265528184 | 0.291129077 | 0.385 | 0.349 | 1 |
| Map4k3 | 0.265621033 | -0.282069235 | 0.203 | 0.27 | 1 |
| Me1 | 0.266072684 | -0.313982915 | 0.198 | 0.254 | 1 |
| Zfc3h1 | 0.266778769 | -0.260109407 | 0.148 | 0.206 | 1 |
| Secisbp2 | 0.267120319 | 0.265599776 | 0.11 | 0.063 | 1 |
| Snd1 | 0.267643988 | 0.282193729 | 0.253 | 0.19 | 1 |
| Mfn1 | 0.268301517 | -0.30606525 | 0.549 | 0.619 | 1 |
| Rlim | 0.268847912 | 0.270950649 | 0.11 | 0.063 | 1 |
| Cradd | 0.268978939 | -0.373008774 | 0.093 | 0.143 | 1 |
| Upf3b | 0.269811032 | -0.363758985 | 0.198 | 0.254 | 1 |
| Raph1 | 0.27105836 | -0.296583433 | 0.082 | 0.127 | 1 |
| 9530026P05Rik | 0.271399159 | 0.314805488 | 0.302 | 0.222 | 1 |
| Pacs1 | 0.271523412 | 0.291318801 | 0.275 | 0.206 | 1 |
| Mphosph8 | 0.272352214 | 0.297127034 | 0.181 | 0.127 | 1 |
| Nrg3 | 0.272416721 | 0.396369822 | 0.429 | 0.397 | 1 |
| Pxdn | 0.272837221 | 0.304215734 | 0.104 | 0.063 | 1 |
| Mtch2 | 0.274851759 | 0.334366559 | 0.225 | 0.175 | 1 |
| Gm47423 | 0.27522046 | -0.296625764 | 0.176 | 0.238 | 1 |
| Frmd5 | 0.27563135 | 0.371429443 | 0.143 | 0.095 | 1 |
| Kpna1 | 0.275899096 | -0.302437367 | 0.165 | 0.222 | 1 |
| Rapgef4 | 0.277185642 | 0.299840541 | 0.143 | 0.095 | 1 |
| BC005561 | 0.277885316 | 0.338761139 | 0.214 | 0.159 | 1 |
| Ngly1 | 0.277934045 | 0.260346599 | 0.181 | 0.127 | 1 |
| Jam2 | 0.278328297 | -0.281026826 | 0.258 | 0.302 | 1 |
| Plxna2 | 0.278567734 | 0.365091745 | 0.159 | 0.111 | 1 |
| Set | 0.279677136 | 0.288870268 | 0.148 | 0.095 | 1 |
| Immp2l | 0.279774296 | 0.300418535 | 0.253 | 0.19 | 1 |
| Rnf182 | 0.283404481 | 0.329467422 | 0.242 | 0.19 | 1 |
| Mios | 0.283677938 | -0.294762332 | 0.082 | 0.127 | 1 |
| 4930415C11Rik | 0.283677938 | 0.376147397 | 0.104 | 0.063 | 1 |
| Zfand5 | 0.284131551 | -0.344377353 | 0.203 | 0.254 | 1 |
| Bag4 | 0.284261624 | -0.283842055 | 0.071 | 0.111 | 1 |
| Ctdspl | 0.2846498 | 0.263284419 | 0.357 | 0.302 | 1 |
| Gng12 | 0.285357716 | 0.275308677 | 0.39 | 0.333 | 1 |
| Ralgps2 | 0.285867845 | 0.321855767 | 0.302 | 0.238 | 1 |
| St7l | 0.287732809 | -0.28398208 | 0.198 | 0.254 | 1 |
| Cox7a2l | 0.288187117 | -0.270524057 | 0.071 | 0.111 | 1 |
| Chic2 | 0.288289828 | 0.258512872 | 0.264 | 0.19 | 1 |
| Agap1 | 0.288687495 | -0.261413371 | 0.33 | 0.413 | 1 |
| Gm9925 | 0.289711196 | 0.308127895 | 0.192 | 0.143 | 1 |
| Rai1 | 0.29091779 | -0.290004874 | 0.225 | 0.286 | 1 |
| Spast | 0.292303425 | 0.269488724 | 0.22 | 0.159 | 1 |
| Spin1 | 0.292386153 | 0.280684958 | 0.121 | 0.079 | 1 |
| Gin1 | 0.293233782 | 0.260823157 | 0.126 | 0.079 | 1 |
| Gm5577 | 0.294676946 | 0.30622317 | 0.143 | 0.095 | 1 |
| Map2k2 | 0.294676946 | 0.329298738 | 0.143 | 0.095 | 1 |
| Mast4 | 0.295196345 | 0.352558784 | 0.599 | 0.603 | 1 |
| Atl1 | 0.295500096 | 0.35528923 | 0.17 | 0.127 | 1 |
| Tmco3 | 0.29587867 | 0.340145458 | 0.121 | 0.079 | 1 |
| Myo18a | 0.296375945 | 0.328659812 | 0.467 | 0.444 | 1 |
| Nln | 0.296789993 | 0.273357566 | 0.209 | 0.159 | 1 |
| Gkap1 | 0.29747945 | -0.252360912 | 0.214 | 0.27 | 1 |
| Frrs1l | 0.298218046 | 0.297694694 | 0.192 | 0.143 | 1 |
| Pex14 | 0.298559569 | -0.361401386 | 0.143 | 0.19 | 1 |
| Mms19 | 0.298707258 | -0.259211522 | 0.115 | 0.159 | 1 |
| Clpp | 0.298832542 | 0.315355906 | 0.154 | 0.111 | 1 |
| Cpne2 | 0.299830152 | 0.311630043 | 0.176 | 0.127 | 1 |
| Insr | 0.299933341 | 0.29541961 | 0.478 | 0.444 | 1 |
| Zmynd8 | 0.300742195 | 0.284414286 | 0.297 | 0.238 | 1 |
| Fgd4 | 0.301547575 | -0.263156841 | 0.385 | 0.444 | 1 |
| Mpc2 | 0.301879901 | -0.284431544 | 0.11 | 0.159 | 1 |
| Nrsn1 | 0.3022127 | -0.277455263 | 0.071 | 0.111 | 1 |
| Cdh19 | 0.302647523 | -0.267501843 | 0.489 | 0.603 | 1 |
| Tmem87a | 0.305536442 | 0.346405415 | 0.22 | 0.175 | 1 |
| Ddr1 | 0.305845697 | 0.308193672 | 0.176 | 0.127 | 1 |
| Herc4 | 0.307191328 | 0.252528819 | 0.308 | 0.254 | 1 |
| Slc38a9 | 0.30741558 | 0.25545148 | 0.302 | 0.238 | 1 |
| Zcchc14 | 0.308370093 | 0.258485987 | 0.214 | 0.159 | 1 |
| Car10 | 0.309924397 | -0.283152264 | 0.363 | 0.429 | 1 |
| Smurf2 | 0.310847077 | 0.276429496 | 0.308 | 0.254 | 1 |
| Galnt7 | 0.310962601 | 0.271035373 | 0.159 | 0.111 | 1 |
| Ptprs | 0.311656311 | 0.26521063 | 0.319 | 0.254 | 1 |
| Zfp1 | 0.312041465 | 0.250221558 | 0.104 | 0.063 | 1 |
| Fbxw8 | 0.312208928 | 0.289896945 | 0.209 | 0.159 | 1 |
| Grip1 | 0.312389801 | -0.355791181 | 0.33 | 0.381 | 1 |
| Arpc1a | 0.312729332 | 0.259905148 | 0.231 | 0.175 | 1 |
| Mid2 | 0.312763792 | 0.316115457 | 0.192 | 0.143 | 1 |
| 1700025G04Rik | 0.312892974 | 0.299143992 | 0.143 | 0.095 | 1 |
| Stx4a | 0.313757051 | 0.316103293 | 0.121 | 0.079 | 1 |
| Map1a | 0.315620962 | 0.323788984 | 0.137 | 0.095 | 1 |
| St3gal3 | 0.316146235 | 0.378259421 | 0.209 | 0.175 | 1 |
| Elp4 | 0.316701665 | 0.298032515 | 0.429 | 0.381 | 1 |
| Gm36975 | 0.317155006 | 0.301479171 | 0.198 | 0.143 | 1 |
| Gm4221 | 0.317641472 | 0.261342044 | 0.181 | 0.127 | 1 |
| Jakmip1 | 0.317955133 | 0.476282343 | 0.297 | 0.254 | 1 |
| Cdh13 | 0.319077687 | 0.342429924 | 0.137 | 0.095 | 1 |
| Eps8 | 0.31924602 | -0.289473654 | 0.484 | 0.524 | 1 |
| Ubr3 | 0.319271816 | -0.293913985 | 0.445 | 0.508 | 1 |
| Fntb | 0.321897701 | 0.28130561 | 0.104 | 0.063 | 1 |
| Gstm1 | 0.322957417 | 0.274802723 | 0.121 | 0.079 | 1 |
| Tnfrsf19 | 0.32299737 | 0.293129612 | 0.165 | 0.111 | 1 |
| Ermard | 0.323112451 | 0.308248095 | 0.258 | 0.206 | 1 |
| Ccnyl1 | 0.323295544 | -0.256523902 | 0.077 | 0.111 | 1 |
| Paxbp1 | 0.323952948 | -0.325272749 | 0.335 | 0.429 | 1 |
| Ptk2 | 0.324400682 | -0.290301229 | 0.665 | 0.73 | 1 |
| Tubgcp5 | 0.324768916 | 0.328467026 | 0.154 | 0.111 | 1 |
| Ptpn9 | 0.325201678 | 0.331380831 | 0.313 | 0.27 | 1 |
| Ndfip1 | 0.325210236 | -0.280697352 | 0.181 | 0.238 | 1 |
| Rasa3 | 0.326044592 | 0.261458225 | 0.264 | 0.206 | 1 |
| Rimklb | 0.326118608 | 0.308720158 | 0.319 | 0.27 | 1 |
| Tspyl4 | 0.326597174 | 0.259082448 | 0.143 | 0.095 | 1 |
| Xpnpep3 | 0.327297892 | -0.275842216 | 0.071 | 0.111 | 1 |
| Atp9a | 0.330443095 | -0.35189717 | 0.099 | 0.143 | 1 |
| Ctso | 0.330910763 | 0.263659768 | 0.231 | 0.175 | 1 |
| Epb41l1 | 0.332319407 | 0.25516885 | 0.154 | 0.111 | 1 |
| Padi2 | 0.333887997 | 0.261212006 | 0.159 | 0.111 | 1 |
| Gm4876 | 0.33389957 | 0.308283088 | 0.176 | 0.127 | 1 |
| Zbtb7a | 0.33422771 | -0.265672402 | 0.099 | 0.143 | 1 |
| Pafah1b2 | 0.334463664 | 0.399332042 | 0.17 | 0.127 | 1 |
| Zfp36l1 | 0.33559509 | 0.256196805 | 0.187 | 0.143 | 1 |
| Parp8 | 0.335763404 | 0.294638778 | 0.324 | 0.27 | 1 |
| Pip5k1a | 0.336182035 | -0.250905854 | 0.236 | 0.286 | 1 |
| Maoa | 0.336577884 | -0.3457434 | 0.143 | 0.19 | 1 |
| Jarid2 | 0.339417214 | 0.284903686 | 0.462 | 0.444 | 1 |
| Armc8 | 0.339489299 | 0.354278371 | 0.286 | 0.254 | 1 |
| Chd2 | 0.339583026 | 0.260912445 | 0.456 | 0.429 | 1 |
| Scaf4 | 0.341667132 | 0.272473195 | 0.192 | 0.143 | 1 |
| Cep68 | 0.342147893 | 0.272900708 | 0.137 | 0.095 | 1 |
| Mdh2 | 0.343204575 | 0.366221162 | 0.165 | 0.127 | 1 |
| Tmeff2 | 0.343397112 | 0.30163893 | 0.253 | 0.206 | 1 |
| Rhoa | 0.343608272 | 0.267124462 | 0.176 | 0.127 | 1 |
| Parg | 0.343763069 | 0.255529276 | 0.28 | 0.238 | 1 |
| Rnf13 | 0.344337268 | 0.349622207 | 0.291 | 0.27 | 1 |
| Meis1 | 0.344862888 | 0.263504186 | 0.412 | 0.365 | 1 |
| Naa16 | 0.345556118 | 0.254001498 | 0.22 | 0.175 | 1 |
| Vcl | 0.345965794 | 0.308486825 | 0.357 | 0.333 | 1 |
| Ube2w | 0.348198612 | 0.321388002 | 0.242 | 0.19 | 1 |
| Dhx32 | 0.348236235 | 0.283673296 | 0.187 | 0.143 | 1 |
| Rap1a | 0.349266579 | 0.302835452 | 0.17 | 0.127 | 1 |
| Notch3 | 0.349947146 | 0.314957224 | 0.209 | 0.159 | 1 |
| Lrrc7 | 0.352859886 | -0.297849096 | 0.621 | 0.683 | 1 |
| Invs | 0.353796747 | -0.252107293 | 0.181 | 0.238 | 1 |
| Peak1 | 0.356054485 | 0.281596363 | 0.429 | 0.381 | 1 |
| Gm20687 | 0.357459764 | 0.291592705 | 0.115 | 0.079 | 1 |
| Gm13483 | 0.359189097 | 0.262224743 | 0.154 | 0.111 | 1 |
| Ank | 0.360353709 | 0.299374051 | 0.478 | 0.444 | 1 |
| Dennd4c | 0.361867795 | 0.317309075 | 0.308 | 0.27 | 1 |
| Pygb | 0.363622898 | 0.274809623 | 0.599 | 0.635 | 1 |
| Grik4 | 0.363732842 | 0.286331703 | 0.198 | 0.159 | 1 |
| Ptges3 | 0.364025282 | 0.325861843 | 0.148 | 0.111 | 1 |
| Grin1 | 0.368148916 | 0.340434941 | 0.231 | 0.19 | 1 |
| Stat5b | 0.369668563 | 0.260640947 | 0.286 | 0.238 | 1 |
| Emc2 | 0.370575354 | 0.253658132 | 0.192 | 0.143 | 1 |
| Spns1 | 0.373465744 | -0.31069725 | 0.077 | 0.111 | 1 |
| Tmem130 | 0.373815299 | 0.265484296 | 0.115 | 0.079 | 1 |
| Sycp2 | 0.37703356 | 0.292692279 | 0.28 | 0.238 | 1 |
| Nedd4l | 0.377437815 | 0.267161204 | 0.489 | 0.46 | 1 |
| 5730522E02Rik | 0.378127134 | 0.48841573 | 0.209 | 0.175 | 1 |
| Lars2 | 0.378456519 | 0.374828884 | 0.363 | 0.317 | 1 |
| Saraf | 0.378714702 | 0.283358133 | 0.148 | 0.111 | 1 |
| Gabarapl2 | 0.379697438 | 0.298834818 | 0.132 | 0.095 | 1 |
| Tubb4a | 0.381665637 | 0.325651617 | 0.132 | 0.095 | 1 |
| Fam120b | 0.382343356 | 0.254400701 | 0.242 | 0.19 | 1 |
| Mindy3 | 0.383500172 | -0.25733802 | 0.192 | 0.238 | 1 |
| Itgb1 | 0.3872731 | -0.286829463 | 0.17 | 0.206 | 1 |
| Atp11a | 0.388423617 | -0.290896183 | 0.137 | 0.175 | 1 |
| Gabra2 | 0.393023735 | 0.431686448 | 0.39 | 0.381 | 1 |
| Taf3 | 0.393712821 | 0.313942099 | 0.165 | 0.127 | 1 |
| Ranbp9 | 0.397311203 | 0.264352068 | 0.335 | 0.302 | 1 |
| Dennd4a | 0.39748241 | 0.354214469 | 0.374 | 0.349 | 1 |
| B3galt2 | 0.398288975 | -0.309183198 | 0.165 | 0.206 | 1 |
| Hsf2 | 0.400849732 | -0.311439833 | 0.11 | 0.143 | 1 |
| Ddx6 | 0.401382855 | 0.289837657 | 0.313 | 0.286 | 1 |
| Ino80 | 0.403015444 | 0.297458134 | 0.225 | 0.19 | 1 |
| Mpv17l | 0.403349851 | 0.262689856 | 0.148 | 0.111 | 1 |
| Abhd2 | 0.403948759 | 0.319011078 | 0.126 | 0.095 | 1 |
| Aox1 | 0.404978058 | 0.325056918 | 0.176 | 0.143 | 1 |
| Fbxw11 | 0.408199997 | 0.251358708 | 0.341 | 0.302 | 1 |
| Apod | 0.410189373 | 0.343993321 | 0.126 | 0.095 | 1 |
| Micu3 | 0.41249417 | 0.284377017 | 0.346 | 0.317 | 1 |
| Klhl5 | 0.416152617 | 0.279924315 | 0.319 | 0.302 | 1 |
| Mccc2 | 0.417676886 | 0.254018522 | 0.187 | 0.143 | 1 |
| Etv1 | 0.41897642 | 0.297881106 | 0.148 | 0.111 | 1 |
| Cramp1l | 0.419445193 | 0.335503762 | 0.176 | 0.143 | 1 |
| Rc3h1 | 0.419974487 | 0.33202862 | 0.28 | 0.254 | 1 |
| Aldoc | 0.431280591 | 0.297516421 | 0.242 | 0.206 | 1 |
| Micu1 | 0.432462353 | 0.294608021 | 0.192 | 0.159 | 1 |
| Ecsit | 0.433027923 | -0.324433591 | 0.082 | 0.111 | 1 |
| Vps13c | 0.442843847 | 0.270702734 | 0.22 | 0.19 | 1 |
| Myh14 | 0.444582336 | 0.382970692 | 0.214 | 0.19 | 1 |
| Iars | 0.445048082 | 0.281106364 | 0.11 | 0.079 | 1 |
| Sugct | 0.445389063 | 0.302897571 | 0.363 | 0.333 | 1 |
| 6330403K07Rik | 0.448063407 | 0.335319567 | 0.154 | 0.127 | 1 |
| Dopey1 | 0.448089356 | 0.265241908 | 0.236 | 0.206 | 1 |
| Erc1 | 0.449077657 | -0.260319173 | 0.28 | 0.317 | 1 |
| Mast2 | 0.450614847 | 0.279413779 | 0.209 | 0.175 | 1 |
| Aldh5a1 | 0.453237989 | 0.267053484 | 0.126 | 0.095 | 1 |
| Mdh1 | 0.453726029 | -0.282557503 | 0.302 | 0.349 | 1 |
| AC154683.1 | 0.458007552 | 0.320427641 | 0.143 | 0.111 | 1 |
| Polr3h | 0.460264748 | -0.256465071 | 0.247 | 0.286 | 1 |
| Hacd3 | 0.46130351 | 0.288111782 | 0.297 | 0.286 | 1 |
| Map2k5 | 0.461524931 | 0.329627745 | 0.346 | 0.317 | 1 |
| Gucy1a2 | 0.471683158 | 0.295017299 | 0.258 | 0.238 | 1 |
| Gabarapl1 | 0.472278292 | -0.304573645 | 0.11 | 0.143 | 1 |
| Glt8d1 | 0.482362898 | 0.303707945 | 0.203 | 0.175 | 1 |
| Rc3h2 | 0.48238312 | 0.318347057 | 0.275 | 0.254 | 1 |
| Fbxw4 | 0.483101277 | 0.298394168 | 0.247 | 0.222 | 1 |
| Unc5c | 0.485528366 | 0.287546112 | 0.231 | 0.206 | 1 |
| Gnao1 | 0.491105216 | -0.276270102 | 0.632 | 0.667 | 1 |
| Cspp1 | 0.495684168 | 0.336364136 | 0.341 | 0.333 | 1 |
| Fto | 0.498472092 | 0.260051274 | 0.588 | 0.635 | 1 |
| Gm44593 | 0.505106563 | 0.309755311 | 0.121 | 0.095 | 1 |
| Fgf13 | 0.505584559 | 0.383838122 | 0.231 | 0.317 | 1 |
| Atrn | 0.505874483 | 0.268590399 | 0.319 | 0.302 | 1 |
| Scd2 | 0.505941852 | 0.285258664 | 0.588 | 0.635 | 1 |
| Psmb1 | 0.506447288 | 0.331286253 | 0.148 | 0.127 | 1 |
| Zdhhc21 | 0.506545386 | 0.35324142 | 0.187 | 0.159 | 1 |
| Trappc8 | 0.511759895 | -0.334593555 | 0.242 | 0.27 | 1 |
| Zfyve9 | 0.518159738 | 0.276696156 | 0.357 | 0.349 | 1 |
| Ptchd4 | 0.518412022 | 0.335659357 | 0.17 | 0.143 | 1 |
| Vgll4 | 0.519058111 | 0.260668762 | 0.264 | 0.254 | 1 |
| L3mbtl3 | 0.523500028 | -0.367468837 | 0.225 | 0.254 | 1 |
| Eaf2 | 0.524910117 | 0.320218566 | 0.137 | 0.111 | 1 |
| Arhgef10 | 0.526141698 | 0.250888555 | 0.231 | 0.206 | 1 |
| Msantd2 | 0.527024821 | 0.250963862 | 0.203 | 0.175 | 1 |
| Inf2 | 0.539378982 | 0.251471827 | 0.165 | 0.143 | 1 |
| St6gal1 | 0.543359785 | 0.304162379 | 0.313 | 0.302 | 1 |
| Sox1 | 0.543799213 | 0.282764384 | 0.115 | 0.095 | 1 |
| Megf9 | 0.54931123 | -0.353690112 | 0.203 | 0.222 | 1 |
| Gm15738 | 0.55013465 | 0.256687067 | 0.165 | 0.143 | 1 |
| Csrnp3 | 0.557871296 | 0.275531837 | 0.291 | 0.27 | 1 |
| Cfl2 | 0.564447737 | 0.251533774 | 0.148 | 0.127 | 1 |
| Tomm40 | 0.567560485 | -0.294178747 | 0.154 | 0.175 | 1 |
| Swt1 | 0.570782278 | -0.264489097 | 0.192 | 0.222 | 1 |
| Dgkh | 0.573605943 | 0.306339907 | 0.22 | 0.206 | 1 |
| Shroom2 | 0.582599069 | 0.329529642 | 0.363 | 0.365 | 1 |
| Phf8 | 0.58524633 | 0.258671462 | 0.165 | 0.143 | 1 |
| Aig1 | 0.587734068 | 0.299502476 | 0.286 | 0.27 | 1 |
| Stk3 | 0.589435429 | 0.297106828 | 0.28 | 0.27 | 1 |
| Rspry1 | 0.597876559 | 0.272591191 | 0.225 | 0.206 | 1 |
| Dok6 | 0.597876701 | 0.273070179 | 0.225 | 0.206 | 1 |
| Slc32a1 | 0.598008746 | 0.294676989 | 0.236 | 0.238 | 1 |
| Zfp423 | 0.604524162 | 0.26797323 | 0.341 | 0.349 | 1 |
| Aspa | 0.608327376 | -0.254460125 | 0.121 | 0.143 | 1 |
| Sgcd | 0.608963561 | 0.2538587 | 0.247 | 0.222 | 1 |
| Aftph | 0.621759851 | 0.266248013 | 0.247 | 0.238 | 1 |
| Slc43a2 | 0.633802398 | 0.286754417 | 0.159 | 0.143 | 1 |
| Reep3 | 0.658705474 | 0.343631429 | 0.231 | 0.222 | 1 |
| Ywhag | 0.664382753 | 0.277197104 | 0.264 | 0.254 | 1 |
| Opcml | 0.664666951 | 0.282260831 | 0.302 | 0.317 | 1 |
| Zfp397 | 0.666689483 | 0.253881268 | 0.143 | 0.127 | 1 |
| Zfp710 | 0.670951828 | 0.276813464 | 0.231 | 0.238 | 1 |
| 9430041J12Rik | 0.680873023 | 0.305224202 | 0.291 | 0.302 | 1 |
| 4930488L21Rik | 0.693190503 | -0.307848394 | 0.132 | 0.143 | 1 |
| Ralgds | 0.695053167 | 0.276044125 | 0.176 | 0.175 | 1 |
| Fkbp3 | 0.699464307 | -0.261710671 | 0.115 | 0.127 | 1 |
| Enpp2 | 0.700967614 | 0.295663653 | 0.225 | 0.222 | 1 |
| Col4a3bp | 0.705014778 | -0.346339751 | 0.242 | 0.254 | 1 |
| Chl1 | 0.729228318 | -0.325282147 | 0.341 | 0.333 | 1 |
| Gm26561 | 0.896168406 | -0.274230708 | 0.143 | 0.143 | 1 |
| Otud7b | 0.91290161 | 0.251583382 | 0.247 | 0.27 | 1 |
| Nfkb1 | 0.925366093 | 0.2694726 | 0.313 | 0.381 | 1 |
| Mtor | 0.942993856 | 0.251767086 | 0.236 | 0.254 | 1 |

| **Supplemental Table S6. Differentially expressed genes in each NSC & astrocyte sub-type generated comparing the control and the mTBI SVZ, related to Figure 4. (Neuroblasts DEGs)** | | | | | |
| --- | --- | --- | --- | --- | --- |
| Column1 | p_val | avg_log2FC | pct.1 | pct.2 | p_val_adj |
| Gm42418 | 1.68847E-20 | 0.569618546 | 1 | 1 | 3.83502E-16 |
| Malat1 | 2.15772E-17 | 0.334678969 | 1 | 1 | 4.90084E-13 |
| Kcnip4 | 8.69007E-08 | 0.659953925 | 0.859 | 0.718 | 0.001973775 |
| Cmss1 | 2.11604E-06 | 0.41514703 | 0.915 | 0.837 | 0.048061611 |
| Plp1 | 6.27559E-06 | 0.440232703 | 0.897 | 0.742 | 0.142537463 |
| Gm42439 | 2.40554E-05 | -0.602825883 | 0.38 | 0.536 | 0.546369623 |
| Tac1 | 2.54435E-05 | -0.71239785 | 0.218 | 0.381 | 0.577898296 |
| Nol4 | 2.71648E-05 | 0.381921263 | 0.979 | 0.956 | 0.616995122 |
| Arpp21 | 2.81458E-05 | -0.511666037 | 0.513 | 0.643 | 0.639275639 |
| Ppp1r2 | 7.52296E-05 | -0.526348469 | 0.218 | 0.381 | 1 |
| Gm3764 | 8.89151E-05 | 0.438253424 | 0.795 | 0.627 | 1 |
| Sox6 | 0.000120012 | 0.284432667 | 0.457 | 0.262 | 1 |
| Sowaha | 0.000136693 | -0.463333977 | 0.021 | 0.107 | 1 |
| Heatr6 | 0.000147892 | 0.475481095 | 0.209 | 0.087 | 1 |
| Vwa8 | 0.00015546 | 0.391647812 | 0.218 | 0.091 | 1 |
| Syp | 0.000178401 | 0.530407549 | 0.342 | 0.19 | 1 |
| Ldha | 0.000178634 | -0.479687453 | 0.026 | 0.111 | 1 |
| Il1rapl1 | 0.000183073 | -0.557718804 | 0.944 | 0.909 | 1 |
| Pcp4 | 0.000203857 | -0.542260168 | 0.491 | 0.623 | 1 |
| Kcnc1 | 0.000205873 | 0.408849939 | 0.256 | 0.123 | 1 |
| Plxna4 | 0.000211135 | 0.695034364 | 0.705 | 0.599 | 1 |
| Dst | 0.00024777 | 0.470116638 | 0.423 | 0.262 | 1 |
| Trim35 | 0.000260218 | 0.552710453 | 0.329 | 0.187 | 1 |
| Bmper | 0.000262978 | 0.546146993 | 0.231 | 0.103 | 1 |
| Fgf14 | 0.000288736 | -0.419676029 | 0.906 | 0.913 | 1 |
| Tbl1x | 0.000296205 | 0.417705615 | 0.632 | 0.484 | 1 |
| Specc1 | 0.000319501 | 0.384735294 | 0.188 | 0.075 | 1 |
| Creb5 | 0.000324363 | 0.452505959 | 0.115 | 0.032 | 1 |
| Sorbs2os | 0.000360875 | -0.569511226 | 0.197 | 0.325 | 1 |
| Robo2 | 0.000363892 | -0.379581942 | 0.889 | 0.933 | 1 |
| AC149090.1 | 0.000369916 | 0.532782014 | 0.252 | 0.127 | 1 |
| Leng8 | 0.000443147 | 0.388667026 | 0.188 | 0.079 | 1 |
| Dscam | 0.000471297 | -0.573338811 | 0.325 | 0.456 | 1 |
| Vrk1 | 0.000559697 | 0.484193999 | 0.192 | 0.087 | 1 |
| Kif21a | 0.000575536 | 0.363805147 | 0.526 | 0.349 | 1 |
| Mthfs | 0.000738525 | 0.413312032 | 0.128 | 0.044 | 1 |
| Limk2 | 0.000741085 | 0.414313933 | 0.179 | 0.075 | 1 |
| Calm1 | 0.00074193 | -0.443753471 | 0.449 | 0.579 | 1 |
| Eml1 | 0.000746275 | 0.296365909 | 0.103 | 0.028 | 1 |
| Nrbp2 | 0.000746883 | 0.275703478 | 0.111 | 0.032 | 1 |
| Itm2c | 0.000837448 | -0.393995235 | 0.402 | 0.528 | 1 |
| Celf2 | 0.000880451 | -0.257925153 | 0.991 | 0.992 | 1 |
| Pbx3 | 0.000947417 | -0.354798489 | 0.855 | 0.889 | 1 |
| Adarb1 | 0.000956559 | 0.448773422 | 0.154 | 0.063 | 1 |
| 6530403H02Rik | 0.000990869 | 0.424467133 | 0.12 | 0.04 | 1 |
| Zmym6 | 0.001013765 | 0.373915674 | 0.132 | 0.048 | 1 |
| Szrd1 | 0.00101562 | 0.346027529 | 0.12 | 0.04 | 1 |
| Spock3 | 0.001033557 | -0.452722143 | 0.556 | 0.655 | 1 |
| Lima1 | 0.001065279 | 0.294314322 | 0.321 | 0.179 | 1 |
| Lysmd4 | 0.001076994 | -0.533920372 | 0.12 | 0.226 | 1 |
| Synpr | 0.001129022 | -0.452579633 | 0.419 | 0.54 | 1 |
| Arhgap33 | 0.001131529 | 0.400121675 | 0.197 | 0.091 | 1 |
| Tshz2 | 0.001132463 | 0.427906141 | 0.346 | 0.21 | 1 |
| Csrnp3 | 0.001161565 | -0.56794312 | 0.397 | 0.492 | 1 |
| Glp2r | 0.001163157 | -0.477716016 | 0.068 | 0.159 | 1 |
| Rims2 | 0.001177261 | 0.36565403 | 0.791 | 0.675 | 1 |
| Fryl | 0.001197995 | 0.423247651 | 0.406 | 0.274 | 1 |
| E130006D01Rik | 0.001219298 | 0.442197983 | 0.154 | 0.063 | 1 |
| Elp4 | 0.001239186 | 0.334997554 | 0.397 | 0.258 | 1 |
| Zfp846 | 0.001251614 | 0.390178884 | 0.158 | 0.067 | 1 |
| Ist1 | 0.001264782 | 0.423481777 | 0.235 | 0.127 | 1 |
| AI846148 | 0.001350866 | 0.364262363 | 0.184 | 0.083 | 1 |
| Fam155a | 0.001406948 | -0.356906419 | 0.705 | 0.829 | 1 |
| Dynll1 | 0.001432822 | -0.508116767 | 0.201 | 0.313 | 1 |
| Tbc1d22a | 0.001442477 | 0.513434474 | 0.214 | 0.111 | 1 |
| Unc5c | 0.001459397 | -0.769098291 | 0.252 | 0.365 | 1 |
| Lrp1b | 0.001465794 | 0.3687618 | 0.756 | 0.639 | 1 |
| Plxna4os3 | 0.001467553 | 0.422583717 | 0.141 | 0.056 | 1 |
| Usp25 | 0.001540959 | 0.342851099 | 0.154 | 0.063 | 1 |
| Tjp1 | 0.001564041 | 0.358239366 | 0.338 | 0.202 | 1 |
| Zmym4 | 0.001627845 | 0.333483941 | 0.581 | 0.429 | 1 |
| Ptprg | 0.001690989 | 0.435891409 | 0.483 | 0.345 | 1 |
| Mphosph9 | 0.001761312 | 0.453647807 | 0.248 | 0.139 | 1 |
| Camk4 | 0.001761518 | -0.466148086 | 0.397 | 0.508 | 1 |
| Dclk2 | 0.001858359 | 0.455599316 | 0.786 | 0.694 | 1 |
| Gm2516 | 0.001873937 | -0.515897751 | 0.047 | 0.127 | 1 |
| Cd1d1 | 0.001937247 | 0.356449315 | 0.162 | 0.071 | 1 |
| Ptov1 | 0.001974471 | 0.287893597 | 0.141 | 0.056 | 1 |
| Ccdc148 | 0.002010874 | 0.349212847 | 0.15 | 0.063 | 1 |
| Lrrc4c | 0.002038071 | -0.423518438 | 0.709 | 0.758 | 1 |
| Nfx1 | 0.002052396 | 0.378385995 | 0.372 | 0.234 | 1 |
| Rarb | 0.002155249 | -0.413475132 | 0.158 | 0.27 | 1 |
| Npy | 0.002179711 | -0.400580218 | 0.038 | 0.111 | 1 |
| Sgcd | 0.002244515 | -0.921026727 | 0.47 | 0.548 | 1 |
| Erbb4 | 0.002271575 | -0.305334388 | 0.949 | 0.964 | 1 |
| Itsn1 | 0.002303416 | 0.329145439 | 0.53 | 0.393 | 1 |
| Cct7 | 0.002321244 | -0.458644432 | 0.081 | 0.171 | 1 |
| Tubb5 | 0.002456896 | -0.479037916 | 0.205 | 0.317 | 1 |
| Sdccag3 | 0.002487183 | 0.322073046 | 0.137 | 0.056 | 1 |
| Calm2 | 0.002490767 | -0.34710182 | 0.628 | 0.774 | 1 |
| Actb | 0.002534916 | -0.47030731 | 0.526 | 0.631 | 1 |
| Adgrb2 | 0.002648776 | -0.40966975 | 0.056 | 0.135 | 1 |
| Gm48512 | 0.002678659 | -0.441260123 | 0.171 | 0.282 | 1 |
| Trim3 | 0.002682251 | 0.332862135 | 0.137 | 0.056 | 1 |
| Dlx1as | 0.002682792 | 0.564761628 | 0.389 | 0.278 | 1 |
| Aff3 | 0.002730909 | 0.413746498 | 0.701 | 0.615 | 1 |
| Gm45323 | 0.002791553 | -0.920187012 | 0.085 | 0.171 | 1 |
| Sel1l3 | 0.00292008 | 0.546763866 | 0.201 | 0.103 | 1 |
| Ccnd2 | 0.002929602 | 0.491305783 | 0.556 | 0.437 | 1 |
| Gnai1 | 0.002977676 | -0.500556248 | 0.162 | 0.27 | 1 |
| Osbpl1a | 0.002989306 | 0.2900754 | 0.188 | 0.091 | 1 |
| Got1 | 0.003000292 | -0.443165497 | 0.103 | 0.194 | 1 |
| Dlx1 | 0.003143092 | 0.397378017 | 0.427 | 0.302 | 1 |
| Vstm2a | 0.00322953 | 0.273656763 | 0.145 | 0.063 | 1 |
| Dlx6os1 | 0.003386573 | 0.272287376 | 0.906 | 0.853 | 1 |
| Frmd4a | 0.003387306 | 0.395370238 | 0.615 | 0.496 | 1 |
| Macrod2 | 0.003423082 | -0.47076687 | 0.786 | 0.841 | 1 |
| Nfia | 0.003475742 | 0.328948629 | 0.726 | 0.575 | 1 |
| Sp9 | 0.003479546 | 0.340311432 | 0.389 | 0.262 | 1 |
| Rufy1 | 0.003558206 | 0.434339463 | 0.158 | 0.075 | 1 |
| Grik3 | 0.003606592 | 0.450949272 | 0.521 | 0.385 | 1 |
| Rasd2 | 0.003656949 | -0.435672764 | 0.064 | 0.143 | 1 |
| Fam171b | 0.003711865 | -0.437441115 | 0.346 | 0.456 | 1 |
| Purb | 0.003784152 | -0.415286908 | 0.188 | 0.29 | 1 |
| Cpsf7 | 0.003913708 | 0.429017536 | 0.274 | 0.167 | 1 |
| Tmsb4x | 0.003946642 | -0.361145045 | 0.526 | 0.611 | 1 |
| Map4 | 0.003990684 | 0.388132365 | 0.457 | 0.325 | 1 |
| Pafah1b2 | 0.004569691 | 0.31848915 | 0.244 | 0.135 | 1 |
| Ubb | 0.004614312 | -0.367041578 | 0.551 | 0.655 | 1 |
| Rnf34 | 0.004653648 | 0.344891011 | 0.141 | 0.063 | 1 |
| Ptprz1 | 0.004665791 | 0.513423401 | 0.581 | 0.48 | 1 |
| Fgf12 | 0.004691731 | -0.585877559 | 0.303 | 0.405 | 1 |
| Olfm2 | 0.00472388 | 0.347848235 | 0.188 | 0.099 | 1 |
| Ip6k1 | 0.004771956 | 0.31847665 | 0.141 | 0.063 | 1 |
| Egr1 | 0.00484939 | -0.390923838 | 0.051 | 0.123 | 1 |
| Arpc1a | 0.004863572 | -0.479666719 | 0.218 | 0.317 | 1 |
| Syt1 | 0.004917765 | -0.278683429 | 0.748 | 0.829 | 1 |
| Pja2 | 0.005076361 | -0.41776193 | 0.359 | 0.46 | 1 |
| Snap25 | 0.005076997 | -0.321722233 | 0.701 | 0.79 | 1 |
| AC162302.1 | 0.005225953 | 0.37921176 | 0.316 | 0.206 | 1 |
| Sh3rf1 | 0.005354979 | 0.469396807 | 0.325 | 0.222 | 1 |
| Smg6 | 0.005440692 | 0.361347765 | 0.611 | 0.496 | 1 |
| Ugt8a | 0.005457882 | 0.25341459 | 0.132 | 0.056 | 1 |
| Sst | 0.00556612 | -0.390119661 | 0.205 | 0.313 | 1 |
| Gm43713 | 0.005602264 | -0.298961817 | 0.244 | 0.361 | 1 |
| Cdc37l1 | 0.005618491 | 0.40227561 | 0.329 | 0.222 | 1 |
| Apoe | 0.005717375 | -0.383155239 | 0.449 | 0.544 | 1 |
| Sept10 | 0.005760612 | 0.317044165 | 0.145 | 0.067 | 1 |
| Axin1 | 0.006060683 | 0.405667215 | 0.205 | 0.115 | 1 |
| Kcnb2 | 0.006313563 | -0.581150094 | 0.427 | 0.528 | 1 |
| Ccser1 | 0.006413686 | -0.356782236 | 0.667 | 0.75 | 1 |
| Phka1 | 0.006525903 | 0.340544988 | 0.154 | 0.075 | 1 |
| Penk | 0.006742948 | -0.42463228 | 0.419 | 0.512 | 1 |
| Psmd7 | 0.006916175 | 0.258418166 | 0.167 | 0.083 | 1 |
| Mn1 | 0.007071547 | 0.317776038 | 0.235 | 0.139 | 1 |
| Gaa | 0.007075115 | -0.441878539 | 0.085 | 0.163 | 1 |
| Igfbp5 | 0.007098187 | 0.323224603 | 0.124 | 0.056 | 1 |
| Patl1 | 0.007237144 | -0.355720415 | 0.043 | 0.107 | 1 |
| Rab31 | 0.007244203 | 0.312295093 | 0.162 | 0.083 | 1 |
| Canx | 0.007350984 | -0.435271485 | 0.256 | 0.361 | 1 |
| Tiam2 | 0.007465983 | 0.362558193 | 0.782 | 0.675 | 1 |
| Stmn2 | 0.007491418 | 0.318325414 | 0.594 | 0.468 | 1 |
| Slc15a2 | 0.007587541 | 0.387864197 | 0.124 | 0.056 | 1 |
| Caap1 | 0.007784461 | 0.364078502 | 0.167 | 0.087 | 1 |
| Med14 | 0.007918067 | -0.415585451 | 0.158 | 0.246 | 1 |
| Gm5577 | 0.007943254 | -0.278712685 | 0.081 | 0.163 | 1 |
| Nln | 0.007988156 | 0.399381026 | 0.235 | 0.143 | 1 |
| Wsb1 | 0.008067889 | 0.377969939 | 0.359 | 0.25 | 1 |
| Kdm6a | 0.008189441 | 0.387133616 | 0.329 | 0.218 | 1 |
| Virma | 0.008260137 | 0.283425557 | 0.248 | 0.155 | 1 |
| Ccl25 | 0.008338522 | 0.301085601 | 0.107 | 0.044 | 1 |
| Tmem94 | 0.008381793 | 0.288545849 | 0.111 | 0.048 | 1 |
| Faf2 | 0.008396462 | 0.350474237 | 0.214 | 0.123 | 1 |
| Mcu | 0.008418505 | 0.330899903 | 0.141 | 0.067 | 1 |
| Camk2b | 0.008424899 | -0.362283622 | 0.299 | 0.397 | 1 |
| Snhg11 | 0.008444517 | 0.296324347 | 0.714 | 0.631 | 1 |
| Rnf13 | 0.008564204 | 0.276861855 | 0.35 | 0.242 | 1 |
| Kdm5b | 0.008584228 | -0.339019527 | 0.359 | 0.44 | 1 |
| Chd4 | 0.008672348 | 0.353247242 | 0.436 | 0.313 | 1 |
| Nova2 | 0.00868621 | 0.340271432 | 0.252 | 0.155 | 1 |
| Tial1 | 0.008720775 | 0.314961733 | 0.415 | 0.282 | 1 |
| Arpc2 | 0.008778925 | -0.378668665 | 0.175 | 0.274 | 1 |
| Pantr1 | 0.009013937 | 0.352126146 | 0.393 | 0.278 | 1 |
| A730017C20Rik | 0.009210088 | 0.284291842 | 0.141 | 0.067 | 1 |
| Gtf2i | 0.009219479 | 0.323521471 | 0.491 | 0.377 | 1 |
| Etf1 | 0.009242131 | 0.271617684 | 0.124 | 0.056 | 1 |
| Ctdspl | 0.009295626 | 0.326543387 | 0.201 | 0.115 | 1 |
| Rnf180 | 0.009611206 | 0.3952351 | 0.359 | 0.246 | 1 |
| Mob3b | 0.009613517 | 0.345158874 | 0.491 | 0.369 | 1 |
| Dtx3 | 0.0096353 | 0.373598934 | 0.188 | 0.107 | 1 |
| Ric1 | 0.009671978 | 0.253307683 | 0.145 | 0.071 | 1 |
| Ano4 | 0.009722781 | -0.43044936 | 0.162 | 0.258 | 1 |
| Sec61a2 | 0.010005232 | 0.300748866 | 0.256 | 0.163 | 1 |
| Tmem2 | 0.010019731 | 0.280572119 | 0.517 | 0.397 | 1 |
| Dlg2 | 0.010071406 | -0.286210561 | 0.816 | 0.865 | 1 |
| Abca5 | 0.010343494 | -0.352012035 | 0.06 | 0.127 | 1 |
| Nfrkb | 0.010345895 | 0.317564464 | 0.175 | 0.095 | 1 |
| Gpm6b | 0.010465895 | -0.268204392 | 0.778 | 0.806 | 1 |
| Wdfy1 | 0.010469729 | 0.288260586 | 0.111 | 0.048 | 1 |
| Usp30 | 0.010574777 | -0.401836032 | 0.047 | 0.107 | 1 |
| Scd2 | 0.01067919 | 0.354086015 | 0.496 | 0.373 | 1 |
| Hcn1 | 0.010833986 | -0.529474804 | 0.256 | 0.349 | 1 |
| C79798 | 0.010858423 | -0.408350997 | 0.346 | 0.437 | 1 |
| Asxl3 | 0.01097847 | -0.370637614 | 0.444 | 0.52 | 1 |
| Mt3 | 0.011114988 | 0.312724163 | 0.15 | 0.075 | 1 |
| Prkar1a | 0.011125012 | -0.336113539 | 0.192 | 0.294 | 1 |
| Ppp4r3a | 0.011354562 | 0.294264673 | 0.282 | 0.179 | 1 |
| Taok3 | 0.01136037 | 0.278405336 | 0.222 | 0.131 | 1 |
| Pip5k1b | 0.011364585 | 0.626015701 | 0.167 | 0.095 | 1 |
| Rsrp1 | 0.011458232 | 0.32732227 | 0.526 | 0.44 | 1 |
| Klhl7 | 0.011537172 | 0.324764065 | 0.517 | 0.425 | 1 |
| Mpdz | 0.011601199 | 0.40948307 | 0.359 | 0.262 | 1 |
| Frmd3 | 0.0116436 | -0.347943473 | 0.115 | 0.198 | 1 |
| Hnrnph1 | 0.011700187 | 0.304099218 | 0.41 | 0.294 | 1 |
| Kiz | 0.011781959 | 0.259474991 | 0.244 | 0.147 | 1 |
| Camk2n1 | 0.011820371 | -0.358991217 | 0.235 | 0.337 | 1 |
| Rptor | 0.011918181 | 0.270087851 | 0.397 | 0.278 | 1 |
| Gm45680 | 0.011932952 | -0.504558879 | 0.115 | 0.198 | 1 |
| L1cam | 0.012001494 | 0.28052013 | 0.158 | 0.083 | 1 |
| Tmem87b | 0.012144115 | 0.260718618 | 0.188 | 0.103 | 1 |
| Wdr20 | 0.012178586 | 0.370596732 | 0.231 | 0.143 | 1 |
| Mbtps1 | 0.012284755 | 0.301838496 | 0.192 | 0.111 | 1 |
| Trim37 | 0.012288276 | -0.321986994 | 0.205 | 0.306 | 1 |
| Ccdc186 | 0.012413429 | 0.318557374 | 0.107 | 0.048 | 1 |
| Efl1 | 0.012570101 | 0.331279775 | 0.175 | 0.099 | 1 |
| Txndc12 | 0.012572275 | -0.308699136 | 0.073 | 0.143 | 1 |
| Pnn | 0.012780267 | 0.27070066 | 0.265 | 0.167 | 1 |
| Rtl8a | 0.012795953 | -0.458224202 | 0.085 | 0.155 | 1 |
| Usp28 | 0.012871495 | 0.364731734 | 0.209 | 0.127 | 1 |
| Gmds | 0.012955884 | 0.298639552 | 0.205 | 0.119 | 1 |
| Rnf10 | 0.013071536 | 0.267036992 | 0.197 | 0.111 | 1 |
| Rab14 | 0.013138479 | -0.407198798 | 0.308 | 0.385 | 1 |
| Cachd1 | 0.013155614 | 0.365021742 | 0.325 | 0.226 | 1 |
| Ttyh1 | 0.013321279 | 0.342987892 | 0.209 | 0.123 | 1 |
| Dock2 | 0.013457317 | -0.474812073 | 0.15 | 0.23 | 1 |
| Lingo2 | 0.013505343 | 0.333115512 | 0.47 | 0.349 | 1 |
| Rpl4 | 0.013557432 | -0.324393678 | 0.073 | 0.143 | 1 |
| Tbce | 0.013884426 | 0.33592289 | 0.261 | 0.167 | 1 |
| Sbk1 | 0.014049178 | 0.303564168 | 0.179 | 0.103 | 1 |
| Trim2 | 0.014089705 | 0.317983881 | 0.842 | 0.774 | 1 |
| Cacng4 | 0.01419892 | -0.408609674 | 0.248 | 0.333 | 1 |
| Mical3 | 0.014342396 | 0.306079306 | 0.415 | 0.313 | 1 |
| Paxbp1 | 0.014431067 | 0.333488187 | 0.372 | 0.266 | 1 |
| Rasal2 | 0.014531392 | 0.378785415 | 0.462 | 0.349 | 1 |
| 4930555F03Rik | 0.014720835 | -0.823356896 | 0.081 | 0.147 | 1 |
| Gm28175 | 0.014728299 | 0.29493982 | 0.111 | 0.052 | 1 |
| Ep300 | 0.014762425 | -0.40352414 | 0.244 | 0.317 | 1 |
| Arhgef7 | 0.014846168 | 0.429484786 | 0.38 | 0.294 | 1 |
| Ralgapa2 | 0.015086842 | -0.332809608 | 0.427 | 0.516 | 1 |
| Unc13b | 0.015297287 | -0.414223833 | 0.214 | 0.302 | 1 |
| Atp1a2 | 0.015407313 | 0.298594093 | 0.184 | 0.103 | 1 |
| Ankrd6 | 0.015503526 | 0.318509693 | 0.432 | 0.313 | 1 |
| Kcnip1 | 0.015622727 | -0.486814304 | 0.265 | 0.345 | 1 |
| Mef2c | 0.015638191 | -0.388809227 | 0.299 | 0.393 | 1 |
| Pnisr | 0.015653734 | 0.283920121 | 0.654 | 0.552 | 1 |
| Chd6 | 0.015829223 | 0.314059495 | 0.637 | 0.532 | 1 |
| Clvs1 | 0.015883325 | -0.457980232 | 0.188 | 0.266 | 1 |
| Cdk12 | 0.015987734 | 0.250277376 | 0.423 | 0.31 | 1 |
| D430042O09Rik | 0.016040792 | 0.343130094 | 0.137 | 0.071 | 1 |
| Naa30 | 0.01605056 | 0.269928505 | 0.124 | 0.06 | 1 |
| Dstn | 0.016065512 | 0.265721576 | 0.171 | 0.095 | 1 |
| Cnnm2 | 0.016065512 | 0.280424719 | 0.171 | 0.095 | 1 |
| Jph4 | 0.01625483 | -0.347460791 | 0.145 | 0.23 | 1 |
| Ddx39b | 0.016266879 | 0.253171692 | 0.218 | 0.131 | 1 |
| C130073E24Rik | 0.016430262 | -1.055611886 | 0.214 | 0.294 | 1 |
| Ppp4r3b | 0.016561379 | -0.3572362 | 0.261 | 0.341 | 1 |
| Abcc1 | 0.016824636 | -0.323874806 | 0.047 | 0.103 | 1 |
| Kmt2a | 0.016845503 | 0.263524185 | 0.53 | 0.421 | 1 |
| Ints9 | 0.017065026 | 0.325372813 | 0.137 | 0.071 | 1 |
| Numb | 0.017139101 | 0.303241101 | 0.303 | 0.202 | 1 |
| Ndufc2 | 0.017198359 | -0.371847026 | 0.06 | 0.119 | 1 |
| Rapgef5 | 0.017206397 | -0.389976894 | 0.132 | 0.21 | 1 |
| Cpsf6 | 0.017418882 | 0.34111352 | 0.474 | 0.369 | 1 |
| Rora | 0.017766148 | 0.289678586 | 0.615 | 0.508 | 1 |
| Hnrnpdl | 0.017769853 | 0.267185177 | 0.376 | 0.262 | 1 |
| Rere | 0.017868314 | 0.269535208 | 0.885 | 0.833 | 1 |
| Klf7 | 0.01787495 | 0.285201971 | 0.654 | 0.536 | 1 |
| Tmeff2 | 0.01787791 | -0.549712661 | 0.393 | 0.468 | 1 |
| Sh3bgrl3 | 0.018156928 | -0.303218145 | 0.047 | 0.103 | 1 |
| C130071C03Rik | 0.018237582 | 0.269364503 | 0.803 | 0.734 | 1 |
| Gm29260 | 0.018442218 | 0.680493331 | 0.128 | 0.067 | 1 |
| Jakmip1 | 0.018500324 | 0.288608376 | 0.103 | 0.048 | 1 |
| Gm45321 | 0.018617846 | -0.420365084 | 0.056 | 0.115 | 1 |
| Eif4ebp2 | 0.018788697 | 0.280136759 | 0.154 | 0.083 | 1 |
| Rab6a | 0.018802254 | -0.347667434 | 0.128 | 0.206 | 1 |
| Pdia3 | 0.018888977 | 0.367214665 | 0.145 | 0.079 | 1 |
| Syt4 | 0.018904222 | -0.476685814 | 0.171 | 0.246 | 1 |
| Asap1 | 0.019123702 | 0.265876075 | 0.684 | 0.563 | 1 |
| Pnmal1 | 0.019296571 | -0.312813074 | 0.073 | 0.139 | 1 |
| Zfp445 | 0.019345479 | 0.406329539 | 0.261 | 0.179 | 1 |
| Tmx3 | 0.019395051 | 0.313873221 | 0.222 | 0.139 | 1 |
| Orc2 | 0.019859456 | 0.318446772 | 0.15 | 0.083 | 1 |
| Ap2a2 | 0.019907853 | -0.313309224 | 0.158 | 0.242 | 1 |
| Hint1 | 0.020348457 | -0.498529903 | 0.103 | 0.167 | 1 |
| Rb1 | 0.020401386 | -0.299261441 | 0.252 | 0.345 | 1 |
| Phf21b | 0.020580995 | 0.339244108 | 0.15 | 0.083 | 1 |
| Tmem30a | 0.020980898 | -0.450710094 | 0.231 | 0.313 | 1 |
| Zfp81 | 0.021096855 | 0.282417358 | 0.145 | 0.079 | 1 |
| Gabarapl1 | 0.021105779 | -0.324985453 | 0.145 | 0.222 | 1 |
| Suz12 | 0.02123082 | -0.377666395 | 0.214 | 0.294 | 1 |
| Bahcc1 | 0.021250052 | 0.276071916 | 0.222 | 0.139 | 1 |
| Cpne4 | 0.021445607 | -0.48220828 | 0.205 | 0.298 | 1 |
| Cplx2 | 0.021456726 | -0.323752537 | 0.132 | 0.21 | 1 |
| Wdr7 | 0.021771641 | -0.285251848 | 0.192 | 0.278 | 1 |
| Usp31 | 0.021835731 | -0.290255813 | 0.077 | 0.143 | 1 |
| Robo1 | 0.022016439 | -0.461433531 | 0.389 | 0.464 | 1 |
| Esco1 | 0.022030987 | -0.356139938 | 0.064 | 0.123 | 1 |
| Slf1 | 0.022343892 | 0.402137112 | 0.256 | 0.179 | 1 |
| Ska2 | 0.022774138 | 0.290944063 | 0.128 | 0.067 | 1 |
| Adamtsl1 | 0.023034713 | -0.609575488 | 0.094 | 0.159 | 1 |
| Nkain2 | 0.02350794 | -0.422470697 | 0.765 | 0.774 | 1 |
| Helz | 0.023633597 | 0.352486341 | 0.406 | 0.31 | 1 |
| Nkiras1 | 0.023634536 | 0.333042824 | 0.111 | 0.056 | 1 |
| Cux1 | 0.023731084 | 0.26147897 | 0.564 | 0.452 | 1 |
| Man2a2 | 0.023741175 | 0.279685369 | 0.179 | 0.107 | 1 |
| Pank3 | 0.02381887 | 0.263586042 | 0.145 | 0.079 | 1 |
| Ssbp1 | 0.023848906 | 0.280884652 | 0.128 | 0.067 | 1 |
| Aldoa | 0.024110441 | -0.341707806 | 0.231 | 0.321 | 1 |
| Myo9b | 0.024258583 | 0.264731632 | 0.248 | 0.167 | 1 |
| Fbxo44 | 0.024300934 | 0.288069442 | 0.107 | 0.052 | 1 |
| Nnat | 0.024309239 | 0.285190286 | 0.722 | 0.639 | 1 |
| Slc38a6 | 0.024397457 | 0.306232106 | 0.111 | 0.056 | 1 |
| Hspa8 | 0.024437491 | -0.318994268 | 0.38 | 0.46 | 1 |
| Tspan9 | 0.024562829 | 0.292568433 | 0.128 | 0.067 | 1 |
| Fgfr2 | 0.024572894 | -0.25198843 | 0.701 | 0.734 | 1 |
| Plxnc1 | 0.024576581 | -0.286535872 | 0.209 | 0.294 | 1 |
| Nrd1 | 0.024597238 | 0.291438445 | 0.338 | 0.238 | 1 |
| Nxpe4 | 0.025021287 | 0.320435362 | 0.162 | 0.095 | 1 |
| Zmym5 | 0.025086112 | 0.278221088 | 0.239 | 0.155 | 1 |
| Sh3d19 | 0.025165977 | -0.329186536 | 0.248 | 0.337 | 1 |
| Tnrc6b | 0.025231693 | 0.266503772 | 0.684 | 0.603 | 1 |
| 2900011O08Rik | 0.025234602 | -0.273901524 | 0.154 | 0.238 | 1 |
| Stxbp5l | 0.025468227 | -0.318472712 | 0.427 | 0.504 | 1 |
| Dcp1b | 0.02547295 | 0.296018474 | 0.222 | 0.143 | 1 |
| Tgfa | 0.025578268 | -0.258116323 | 0.064 | 0.123 | 1 |
| Gpat4 | 0.025768114 | 0.345010497 | 0.158 | 0.091 | 1 |
| Ogdh | 0.025793185 | -0.302180367 | 0.137 | 0.214 | 1 |
| Rabgef1 | 0.025896875 | -0.380702323 | 0.073 | 0.131 | 1 |
| Cul1 | 0.02647725 | 0.27299853 | 0.333 | 0.238 | 1 |
| Braf | 0.02658077 | 0.294504761 | 0.526 | 0.425 | 1 |
| Casd1 | 0.02669316 | -0.338833366 | 0.141 | 0.214 | 1 |
| Atp5f1 | 0.026727137 | -0.305241191 | 0.205 | 0.29 | 1 |
| Mdga1 | 0.027430554 | -0.316124534 | 0.06 | 0.115 | 1 |
| Ccnt2 | 0.027697761 | 0.274478135 | 0.346 | 0.242 | 1 |
| Nf2 | 0.027736721 | 0.264699595 | 0.171 | 0.103 | 1 |
| Phactr4 | 0.027974449 | 0.260474403 | 0.248 | 0.167 | 1 |
| Foxp1 | 0.02808316 | -0.251943443 | 0.491 | 0.575 | 1 |
| Ksr2 | 0.028232639 | -0.371594679 | 0.457 | 0.524 | 1 |
| Trim44 | 0.028314269 | -0.345745915 | 0.308 | 0.385 | 1 |
| Fbrsl1 | 0.028329836 | 0.293656407 | 0.282 | 0.198 | 1 |
| mt-Co3 | 0.028779378 | -0.272811553 | 0.684 | 0.758 | 1 |
| Zfp532 | 0.028921865 | 0.365636186 | 0.521 | 0.44 | 1 |
| Zfand5 | 0.029167537 | -0.377638078 | 0.188 | 0.262 | 1 |
| Rock2 | 0.029311354 | -0.253092045 | 0.286 | 0.385 | 1 |
| Fam91a1 | 0.029384116 | -0.299079703 | 0.09 | 0.151 | 1 |
| Mtpap | 0.029402557 | -0.325804921 | 0.051 | 0.103 | 1 |
| Zfpm2 | 0.029785357 | 0.446876199 | 0.218 | 0.143 | 1 |
| Amy1 | 0.030221911 | 0.286093535 | 0.256 | 0.175 | 1 |
| Nras | 0.030369479 | 0.258250214 | 0.162 | 0.095 | 1 |
| Ppp4r4 | 0.030745954 | -0.304354114 | 0.064 | 0.119 | 1 |
| Ube2k | 0.030772131 | 0.28412713 | 0.44 | 0.353 | 1 |
| Spidr | 0.031323234 | 0.328575988 | 0.103 | 0.052 | 1 |
| Smarcc2 | 0.031327579 | 0.278458914 | 0.449 | 0.341 | 1 |
| Phlpp1 | 0.031523327 | 0.261703648 | 0.333 | 0.242 | 1 |
| Actl6a | 0.031543267 | 0.264486529 | 0.115 | 0.06 | 1 |
| Slc1a2 | 0.031608139 | 0.364847159 | 0.436 | 0.345 | 1 |
| Trpc4 | 0.031766116 | 0.305149055 | 0.256 | 0.175 | 1 |
| Slc4a10 | 0.031820161 | -0.41348446 | 0.162 | 0.23 | 1 |
| Tmem65 | 0.031906655 | 0.252591692 | 0.278 | 0.194 | 1 |
| Ccdc50 | 0.032032339 | 0.255630776 | 0.427 | 0.329 | 1 |
| Scrn1 | 0.032094325 | -0.289832871 | 0.077 | 0.139 | 1 |
| Timm8b | 0.032581276 | -0.343151273 | 0.064 | 0.119 | 1 |
| Lzts1 | 0.032988557 | -0.382654131 | 0.124 | 0.19 | 1 |
| Arih2 | 0.033357138 | 0.318897308 | 0.214 | 0.143 | 1 |
| Smarca4 | 0.033462034 | -0.299068351 | 0.261 | 0.333 | 1 |
| Alcam | 0.033500759 | -0.268613163 | 0.38 | 0.46 | 1 |
| Chst2 | 0.033670479 | -0.32406619 | 0.056 | 0.107 | 1 |
| Cep57l1 | 0.033692875 | 0.273488819 | 0.124 | 0.067 | 1 |
| Ranbp10 | 0.033792578 | -0.274475959 | 0.197 | 0.266 | 1 |
| Mdn1 | 0.034127202 | -0.373563473 | 0.145 | 0.218 | 1 |
| Ndufa4 | 0.034225798 | -0.294127237 | 0.103 | 0.167 | 1 |
| Eipr1 | 0.034271867 | 0.251563516 | 0.12 | 0.063 | 1 |
| Htr2c | 0.034350878 | -0.281864534 | 0.115 | 0.183 | 1 |
| Mat2b | 0.03437731 | -0.323508717 | 0.09 | 0.151 | 1 |
| Pard3b | 0.034474352 | 0.280906792 | 0.107 | 0.056 | 1 |
| Rpl41 | 0.03460114 | -0.403192139 | 0.218 | 0.286 | 1 |
| Reep1 | 0.034691358 | -0.364573491 | 0.321 | 0.385 | 1 |
| Gpatch2 | 0.034974949 | 0.376861258 | 0.184 | 0.119 | 1 |
| Smarcb1 | 0.035109911 | 0.296394688 | 0.171 | 0.103 | 1 |
| Neo1 | 0.035109915 | -0.36544736 | 0.222 | 0.302 | 1 |
| Tmsb10 | 0.035280051 | -0.369394195 | 0.085 | 0.143 | 1 |
| Negr1 | 0.03529081 | -0.333500165 | 0.897 | 0.893 | 1 |
| Bicral | 0.035535474 | 0.250247708 | 0.171 | 0.103 | 1 |
| Pam | 0.035639374 | 0.283563786 | 0.598 | 0.484 | 1 |
| Tapt1 | 0.035845421 | -0.352403112 | 0.064 | 0.115 | 1 |
| Gm21954 | 0.036071698 | -0.258381112 | 0.051 | 0.103 | 1 |
| Hdac7 | 0.036104043 | 0.282767397 | 0.15 | 0.087 | 1 |
| Capza2 | 0.036193123 | -0.256645711 | 0.145 | 0.222 | 1 |
| Clcn4 | 0.036277342 | 0.295940051 | 0.162 | 0.099 | 1 |
| RF01962 | 0.036356107 | -0.511974672 | 0.132 | 0.198 | 1 |
| Dcun1d5 | 0.036823656 | 0.299049584 | 0.162 | 0.099 | 1 |
| Plxna2 | 0.036960581 | 0.280614722 | 0.654 | 0.591 | 1 |
| Chsy3 | 0.037358228 | -0.362758229 | 0.252 | 0.325 | 1 |
| Pds5a | 0.037397938 | -0.275621032 | 0.316 | 0.401 | 1 |
| Bcl9 | 0.037585279 | -0.385884193 | 0.376 | 0.437 | 1 |
| Prox1 | 0.037658162 | 0.380109966 | 0.278 | 0.194 | 1 |
| Plcb4 | 0.037959305 | -0.337390408 | 0.496 | 0.536 | 1 |
| Eml4 | 0.037979765 | 0.266953188 | 0.368 | 0.286 | 1 |
| Ergic2 | 0.0386123 | -0.270522207 | 0.137 | 0.206 | 1 |
| Lhfpl3 | 0.038811067 | 0.32321076 | 0.179 | 0.115 | 1 |
| Gabra2 | 0.038860529 | -0.437351996 | 0.274 | 0.345 | 1 |
| Myo1b | 0.038996746 | 0.298511939 | 0.218 | 0.147 | 1 |
| Ano6 | 0.039078242 | -0.390619312 | 0.278 | 0.353 | 1 |
| Tdrd3 | 0.039575829 | -0.294077067 | 0.188 | 0.262 | 1 |
| Dlgap2 | 0.039722376 | -0.379946167 | 0.244 | 0.321 | 1 |
| Trpc4ap | 0.039840901 | 0.312767166 | 0.231 | 0.159 | 1 |
| Gm15489 | 0.039975886 | 0.317927436 | 0.15 | 0.091 | 1 |
| Tmed5 | 0.040170444 | -0.370530737 | 0.111 | 0.171 | 1 |
| Adam23 | 0.04078501 | 0.271321719 | 0.312 | 0.226 | 1 |
| Gm10073 | 0.041329933 | -0.382283335 | 0.094 | 0.151 | 1 |
| Mgat5 | 0.04137768 | 0.282083333 | 0.483 | 0.401 | 1 |
| Mllt11 | 0.041475877 | -0.381199224 | 0.188 | 0.262 | 1 |
| Rad54l2 | 0.042070769 | 0.296921461 | 0.175 | 0.111 | 1 |
| Cnp | 0.04216788 | 0.271592969 | 0.154 | 0.091 | 1 |
| Wdr89 | 0.042378369 | -0.399076767 | 0.158 | 0.222 | 1 |
| Ctps2 | 0.042446018 | 0.286890834 | 0.214 | 0.143 | 1 |
| Slc27a1 | 0.042486835 | -0.313817 | 0.056 | 0.103 | 1 |
| Brd1 | 0.042499846 | 0.363477974 | 0.325 | 0.258 | 1 |
| Slc24a2 | 0.042972342 | 0.2685542 | 0.355 | 0.266 | 1 |
| Fam114a2 | 0.043081132 | -0.310088987 | 0.098 | 0.159 | 1 |
| Serpine2 | 0.043087803 | -0.318164356 | 0.171 | 0.238 | 1 |
| Lrrc58 | 0.043096638 | 0.351659204 | 0.248 | 0.175 | 1 |
| Phactr3 | 0.043222904 | 0.255054767 | 0.397 | 0.313 | 1 |
| Cacna2d1 | 0.043329198 | -0.276790129 | 0.44 | 0.512 | 1 |
| Scg2 | 0.043552937 | -0.307065446 | 0.188 | 0.258 | 1 |
| Fam219a | 0.043559235 | 0.277445815 | 0.235 | 0.159 | 1 |
| Klhl5 | 0.043799289 | 0.332930543 | 0.128 | 0.075 | 1 |
| Stxbp1 | 0.043965124 | 0.330731482 | 0.355 | 0.27 | 1 |
| Slc35f4 | 0.044280816 | -0.383405711 | 0.154 | 0.226 | 1 |
| Nek1 | 0.044493544 | 0.252290275 | 0.192 | 0.123 | 1 |
| Dynll2 | 0.044539308 | -0.279965769 | 0.158 | 0.226 | 1 |
| Mdh1 | 0.044945251 | -0.312203861 | 0.291 | 0.357 | 1 |
| Snx25 | 0.045372545 | 0.278298629 | 0.15 | 0.091 | 1 |
| Pipox | 0.045888597 | 0.264188784 | 0.141 | 0.083 | 1 |
| Ankrd28 | 0.046833812 | 0.290169756 | 0.402 | 0.313 | 1 |
| Npas3 | 0.046897976 | 0.519606387 | 0.214 | 0.147 | 1 |
| Wdr47 | 0.046933559 | 0.29178973 | 0.346 | 0.27 | 1 |
| Plekhh2 | 0.047324064 | -0.348502345 | 0.09 | 0.147 | 1 |
| Rev1 | 0.047515091 | 0.306107716 | 0.209 | 0.143 | 1 |
| Erlin1 | 0.047720722 | -0.251024018 | 0.064 | 0.115 | 1 |
| Arf5 | 0.047740997 | -0.303192673 | 0.124 | 0.19 | 1 |
| Erlec1 | 0.047868584 | -0.318473266 | 0.085 | 0.139 | 1 |
| Vamp4 | 0.047885938 | -0.381599227 | 0.141 | 0.198 | 1 |
| Gm10754 | 0.047996985 | 0.297096703 | 0.201 | 0.135 | 1 |
| Laptm4a | 0.04825105 | 0.256152829 | 0.261 | 0.183 | 1 |
| Pcmtd2 | 0.048590713 | 0.279005435 | 0.278 | 0.202 | 1 |
| 1700109K24Rik | 0.048613752 | -0.329381102 | 0.09 | 0.143 | 1 |
| Zfp30 | 0.048754523 | 0.254275055 | 0.107 | 0.06 | 1 |
| Gm35188 | 0.049008138 | -0.287281567 | 0.103 | 0.163 | 1 |
| Gm27032 | 0.049043321 | -0.292150446 | 0.081 | 0.135 | 1 |
| Col11a1 | 0.049600424 | -0.546180781 | 0.124 | 0.187 | 1 |
| Cep192 | 0.050181248 | 0.269942179 | 0.132 | 0.079 | 1 |
| Bex2 | 0.050507144 | -0.361204808 | 0.274 | 0.341 | 1 |
| Flrt3 | 0.05068254 | -0.3531605 | 0.132 | 0.19 | 1 |
| Anapc4 | 0.050801623 | 0.284656217 | 0.197 | 0.131 | 1 |
| Gtdc1 | 0.051286456 | 0.262079549 | 0.483 | 0.373 | 1 |
| Hsp90ab1 | 0.05232107 | -0.295880343 | 0.278 | 0.361 | 1 |
| Cdca7l | 0.052436037 | 0.323241276 | 0.107 | 0.06 | 1 |
| Grin2b | 0.053236215 | -0.272600151 | 0.56 | 0.627 | 1 |
| Abi2 | 0.05331811 | -0.289120475 | 0.462 | 0.512 | 1 |
| Ap3s2 | 0.053321033 | 0.257313288 | 0.167 | 0.107 | 1 |
| Smc4 | 0.053433772 | 0.29268189 | 0.107 | 0.06 | 1 |
| Dach1 | 0.053610717 | 0.521789655 | 0.346 | 0.274 | 1 |
| Hdac8 | 0.053746317 | 0.251027309 | 0.44 | 0.333 | 1 |
| Cnst | 0.053769854 | 0.26237761 | 0.107 | 0.06 | 1 |
| Atad2b | 0.053809895 | 0.250484069 | 0.453 | 0.361 | 1 |
| Fam13b | 0.05383915 | 0.294627702 | 0.299 | 0.222 | 1 |
| Gdi2 | 0.054350687 | -0.382844375 | 0.218 | 0.282 | 1 |
| Nfix | 0.054405449 | 0.263749222 | 0.543 | 0.44 | 1 |
| Csmd2 | 0.055361461 | -0.387822606 | 0.107 | 0.163 | 1 |
| Rcbtb2 | 0.055638412 | 0.301390711 | 0.167 | 0.107 | 1 |
| Tshz1 | 0.05572916 | -0.288365373 | 0.5 | 0.556 | 1 |
| Ywhae | 0.055952477 | -0.275543798 | 0.449 | 0.536 | 1 |
| Cacybp | 0.056124712 | -0.288080914 | 0.064 | 0.111 | 1 |
| Unk | 0.056195728 | 0.358622045 | 0.162 | 0.107 | 1 |
| Arl8b | 0.05627806 | -0.380185154 | 0.132 | 0.19 | 1 |
| Psmb2 | 0.056408024 | -0.33366255 | 0.132 | 0.19 | 1 |
| Pclo | 0.056939556 | -0.26717449 | 0.308 | 0.373 | 1 |
| Unc80 | 0.056964731 | 0.293422685 | 0.222 | 0.155 | 1 |
| Slc38a2 | 0.057147456 | 0.250693713 | 0.256 | 0.183 | 1 |
| Cfap77 | 0.057157795 | -0.39057729 | 0.15 | 0.206 | 1 |
| Gria1 | 0.0572949 | -0.313297547 | 0.406 | 0.488 | 1 |
| Tmod3 | 0.057384793 | 0.302128023 | 0.158 | 0.099 | 1 |
| Styx | 0.057681827 | -0.275235354 | 0.103 | 0.159 | 1 |
| Rundc3a | 0.057859075 | 0.272175092 | 0.145 | 0.091 | 1 |
| Med26 | 0.058651194 | 0.303790163 | 0.12 | 0.071 | 1 |
| Uhrf1bp1l | 0.058817064 | -0.25413233 | 0.111 | 0.171 | 1 |
| Zfp57 | 0.059339201 | 0.26408564 | 0.218 | 0.151 | 1 |
| Sh3kbp1 | 0.059450377 | 0.284240491 | 0.397 | 0.321 | 1 |
| Gm26979 | 0.059586035 | -0.259404708 | 0.077 | 0.127 | 1 |
| Iqsec2 | 0.059649909 | 0.301478262 | 0.158 | 0.103 | 1 |
| AY036118 | 0.059698475 | -0.266344466 | 0.291 | 0.365 | 1 |
| B4galt6 | 0.059889298 | -0.269557892 | 0.103 | 0.159 | 1 |
| Otud5 | 0.060013218 | -0.307507697 | 0.098 | 0.151 | 1 |
| Rheb | 0.060685154 | 0.286943381 | 0.218 | 0.155 | 1 |
| Atxn7l1 | 0.060997683 | 0.257907828 | 0.346 | 0.266 | 1 |
| Nom1 | 0.061109076 | 0.263762661 | 0.115 | 0.067 | 1 |
| Jam3 | 0.061250758 | 0.333410449 | 0.132 | 0.083 | 1 |
| Ube2q2 | 0.061397127 | -0.288076 | 0.115 | 0.171 | 1 |
| Slc44a5 | 0.061428622 | 0.560046729 | 0.256 | 0.187 | 1 |
| Pappa | 0.061478063 | -0.627816908 | 0.073 | 0.119 | 1 |
| Vldlr | 0.061562233 | -0.264533729 | 0.132 | 0.194 | 1 |
| Hsd17b12 | 0.061654371 | 0.269954436 | 0.209 | 0.147 | 1 |
| 3300002I08Rik | 0.061871037 | 0.294086418 | 0.154 | 0.099 | 1 |
| Wls | 0.061981799 | -0.319779532 | 0.265 | 0.329 | 1 |
| Azin1 | 0.062785554 | -0.273113721 | 0.103 | 0.159 | 1 |
| Hmgb1 | 0.062959433 | 0.303174411 | 0.239 | 0.171 | 1 |
| Rnf216 | 0.063691629 | -0.270265793 | 0.261 | 0.325 | 1 |
| Tomm70a | 0.063739093 | -0.309961383 | 0.201 | 0.262 | 1 |
| Atp1a3 | 0.06409547 | -0.272108339 | 0.325 | 0.405 | 1 |
| mt-Cytb | 0.064354374 | -0.374537749 | 0.479 | 0.524 | 1 |
| Ddx1 | 0.064577225 | 0.25387539 | 0.145 | 0.091 | 1 |
| Mtpn | 0.065255791 | -0.292593261 | 0.154 | 0.21 | 1 |
| Usp6nl | 0.065452009 | -0.274226692 | 0.077 | 0.127 | 1 |
| Stx12 | 0.065892991 | -0.272570827 | 0.081 | 0.131 | 1 |
| Pak1 | 0.066171088 | 0.28309573 | 0.338 | 0.262 | 1 |
| Fancc | 0.066379232 | 0.381437871 | 0.145 | 0.095 | 1 |
| Tle4 | 0.066524061 | -0.315756216 | 0.15 | 0.214 | 1 |
| Msi2 | 0.066776607 | 0.27555571 | 0.855 | 0.794 | 1 |
| Mapk8ip1 | 0.067078567 | 0.266665353 | 0.115 | 0.067 | 1 |
| Csnk2a2 | 0.067742084 | -0.274730856 | 0.124 | 0.179 | 1 |
| Wwox | 0.06820145 | 0.339426385 | 0.291 | 0.222 | 1 |
| H2afz | 0.068305565 | -0.270436698 | 0.115 | 0.171 | 1 |
| Zswim5 | 0.068531729 | 0.443851616 | 0.269 | 0.206 | 1 |
| Eri3 | 0.068556449 | 0.316223711 | 0.299 | 0.23 | 1 |
| Purg | 0.068726155 | 0.323540034 | 0.329 | 0.262 | 1 |
| Cep112 | 0.06993111 | 0.370381434 | 0.162 | 0.111 | 1 |
| Sobp | 0.0704977 | -0.266037475 | 0.509 | 0.567 | 1 |
| Zfp362 | 0.070597207 | 0.26273631 | 0.158 | 0.103 | 1 |
| Bhlhb9 | 0.070772456 | -0.36657648 | 0.085 | 0.131 | 1 |
| Khdrbs2 | 0.07104215 | -0.405416986 | 0.222 | 0.294 | 1 |
| Ndufb9 | 0.071139992 | -0.303962212 | 0.06 | 0.103 | 1 |
| Agap3 | 0.072872598 | -0.291509835 | 0.124 | 0.179 | 1 |
| Gria3 | 0.073558352 | -0.364210917 | 0.256 | 0.317 | 1 |
| 2510009E07Rik | 0.074673229 | 0.280384199 | 0.145 | 0.095 | 1 |
| Gm9843 | 0.074970647 | -0.343146573 | 0.201 | 0.262 | 1 |
| Eps15l1 | 0.074987639 | 0.268024797 | 0.385 | 0.31 | 1 |
| Hbp1 | 0.076260364 | 0.256180496 | 0.235 | 0.171 | 1 |
| Lrrc8b | 0.076851277 | 0.37079103 | 0.197 | 0.143 | 1 |
| Cyp46a1 | 0.077172918 | -0.294655414 | 0.077 | 0.123 | 1 |
| Nap1l4 | 0.078258136 | -0.278715284 | 0.15 | 0.206 | 1 |
| Cyld | 0.079780466 | -0.331619131 | 0.325 | 0.377 | 1 |
| Ddr1 | 0.080229004 | 0.25630451 | 0.265 | 0.198 | 1 |
| Rspry1 | 0.080508517 | 0.250246794 | 0.316 | 0.238 | 1 |
| Actr1a | 0.080539028 | -0.273661302 | 0.128 | 0.179 | 1 |
| Bace1 | 0.080761221 | -0.283916534 | 0.12 | 0.171 | 1 |
| Dcun1d1 | 0.080865435 | -0.297835394 | 0.141 | 0.198 | 1 |
| Gpr88 | 0.08155138 | -0.390165652 | 0.496 | 0.516 | 1 |
| Hras | 0.081800851 | -0.339781114 | 0.103 | 0.151 | 1 |
| Slc25a23 | 0.08187553 | -0.261801416 | 0.115 | 0.167 | 1 |
| Fzd3 | 0.082522614 | -0.304792332 | 0.303 | 0.365 | 1 |
| Apc | 0.082950776 | -0.258151754 | 0.705 | 0.71 | 1 |
| Rap1gds1 | 0.083176954 | -0.29367038 | 0.295 | 0.361 | 1 |
| Eef1a2 | 0.083468615 | -0.280368066 | 0.137 | 0.194 | 1 |
| Actr1b | 0.084472639 | -0.345781187 | 0.068 | 0.111 | 1 |
| Chn1 | 0.084495814 | -0.26123423 | 0.35 | 0.417 | 1 |
| Tmem196 | 0.084841018 | 0.263147201 | 0.115 | 0.071 | 1 |
| Ddn | 0.084941528 | -0.289996827 | 0.068 | 0.111 | 1 |
| Phc2 | 0.086063081 | 0.26586029 | 0.385 | 0.31 | 1 |
| Mrps14 | 0.087014404 | -0.343519783 | 0.085 | 0.131 | 1 |
| Ick | 0.087401008 | -0.274104696 | 0.137 | 0.19 | 1 |
| Sucla2 | 0.087735866 | -0.322413239 | 0.128 | 0.179 | 1 |
| BC005561 | 0.088859994 | 0.26581337 | 0.205 | 0.147 | 1 |
| 2610020C07Rik | 0.089505719 | 0.277645227 | 0.231 | 0.171 | 1 |
| Cers6 | 0.090144583 | -0.312034176 | 0.346 | 0.409 | 1 |
| Man1a | 0.090558221 | -0.284861209 | 0.141 | 0.194 | 1 |
| Ranbp2 | 0.091712092 | -0.257165885 | 0.239 | 0.302 | 1 |
| Plppr4 | 0.093066228 | -0.329002955 | 0.333 | 0.381 | 1 |
| Grid2 | 0.093954177 | 0.28546904 | 0.615 | 0.567 | 1 |
| Pcdh15 | 0.094533867 | -0.748277055 | 0.38 | 0.429 | 1 |
| Atp6v1a | 0.094596106 | -0.329771513 | 0.205 | 0.262 | 1 |
| Pdcd6 | 0.094675353 | -0.271869364 | 0.073 | 0.115 | 1 |
| Gda | 0.09533663 | -0.337796733 | 0.12 | 0.167 | 1 |
| Mmp16 | 0.095486195 | -0.334473331 | 0.372 | 0.429 | 1 |
| Csad | 0.095496083 | 0.27310999 | 0.137 | 0.091 | 1 |
| A830082K12Rik | 0.095737213 | 0.259027051 | 0.124 | 0.079 | 1 |
| Pip4k2a | 0.096567606 | 0.261773908 | 0.184 | 0.131 | 1 |
| Ntan1 | 0.097696394 | -0.296893967 | 0.094 | 0.139 | 1 |
| Scn3a | 0.099216477 | -0.267083835 | 0.35 | 0.405 | 1 |
| Plcl2 | 0.099931493 | -0.267217749 | 0.406 | 0.46 | 1 |
| Ikbkb | 0.100004089 | 0.271865619 | 0.15 | 0.099 | 1 |
| Supt20 | 0.10009143 | 0.258044224 | 0.214 | 0.159 | 1 |
| Nhs | 0.100584731 | 0.443905959 | 0.214 | 0.159 | 1 |
| 3110021N24Rik | 0.101262292 | -0.353570669 | 0.115 | 0.163 | 1 |
| Phf20l1 | 0.101879868 | 0.268881778 | 0.453 | 0.385 | 1 |
| Slc22a17 | 0.103107311 | -0.292271792 | 0.406 | 0.444 | 1 |
| Shisa9 | 0.103244894 | -0.491247166 | 0.141 | 0.19 | 1 |
| Pcdh7 | 0.103890545 | -0.399240709 | 0.359 | 0.409 | 1 |
| Pcdh17 | 0.105655251 | -0.28786254 | 0.265 | 0.313 | 1 |
| Frrs1l | 0.106347888 | -0.264124863 | 0.154 | 0.202 | 1 |
| Dnajc11 | 0.107430972 | 0.256952436 | 0.154 | 0.103 | 1 |
| Prkcz | 0.107474319 | -0.271417079 | 0.158 | 0.206 | 1 |
| C1qtnf4 | 0.107816167 | -0.286617757 | 0.209 | 0.266 | 1 |
| Slc9a1 | 0.108377789 | -0.314510222 | 0.103 | 0.147 | 1 |
| Tubb4a | 0.108974186 | 0.270252545 | 0.235 | 0.179 | 1 |
| Eif4b | 0.109329603 | -0.269955238 | 0.111 | 0.159 | 1 |
| Jak2 | 0.110366711 | -0.256223637 | 0.197 | 0.25 | 1 |
| Scn4b | 0.111793079 | -0.258813815 | 0.235 | 0.298 | 1 |
| Gm26735 | 0.111815874 | -0.271010516 | 0.12 | 0.167 | 1 |
| Celf5 | 0.112688838 | -0.296456648 | 0.15 | 0.198 | 1 |
| Cradd | 0.113407386 | 0.26125257 | 0.137 | 0.091 | 1 |
| Zfp90 | 0.113529754 | 0.254524919 | 0.128 | 0.087 | 1 |
| Akap11 | 0.113645309 | -0.303277974 | 0.303 | 0.361 | 1 |
| Coro1c | 0.114558254 | 0.285634049 | 0.192 | 0.143 | 1 |
| Smim10l1 | 0.115752458 | -0.309392888 | 0.073 | 0.111 | 1 |
| Cpeb3 | 0.115856707 | -0.255224119 | 0.385 | 0.437 | 1 |
| AI593442 | 0.116086946 | -0.296554054 | 0.188 | 0.238 | 1 |
| Nav2 | 0.117817973 | -0.348881074 | 0.316 | 0.369 | 1 |
| Sirpa | 0.118053757 | -0.343690142 | 0.15 | 0.194 | 1 |
| Gm9801 | 0.118372072 | -0.282842248 | 0.235 | 0.286 | 1 |
| Epha5 | 0.118774619 | -0.39879955 | 0.286 | 0.341 | 1 |
| Man1a2 | 0.119700894 | 0.252808534 | 0.278 | 0.222 | 1 |
| Fam49b | 0.121428375 | -0.28465881 | 0.303 | 0.353 | 1 |
| Slc12a2 | 0.122301281 | -0.263184324 | 0.154 | 0.202 | 1 |
| Arhgap26 | 0.122347431 | 0.250706812 | 0.179 | 0.131 | 1 |
| Trim33 | 0.122839727 | -0.317322743 | 0.423 | 0.448 | 1 |
| Zfp410 | 0.122887523 | -0.25325026 | 0.085 | 0.127 | 1 |
| Ntn4 | 0.122985374 | 0.252263066 | 0.158 | 0.111 | 1 |
| Grm8 | 0.123135565 | -0.615670939 | 0.295 | 0.337 | 1 |
| Spred1 | 0.123347651 | -0.262872997 | 0.274 | 0.325 | 1 |
| Prim2 | 0.123352178 | 0.276585137 | 0.132 | 0.091 | 1 |
| Sgk1 | 0.12450308 | 0.286539719 | 0.137 | 0.095 | 1 |
| Nipsnap1 | 0.12534539 | -0.330477206 | 0.145 | 0.187 | 1 |
| Vgf | 0.125394103 | -0.265304705 | 0.128 | 0.175 | 1 |
| Nsg1 | 0.125586434 | -0.268050384 | 0.299 | 0.349 | 1 |
| Wnt5a | 0.127507632 | 0.443234304 | 0.111 | 0.075 | 1 |
| Fam174a | 0.127829076 | -0.264279977 | 0.073 | 0.111 | 1 |
| Lnpk | 0.128951511 | 0.256307002 | 0.248 | 0.194 | 1 |
| Hsp90b1 | 0.129072812 | -0.31794938 | 0.184 | 0.23 | 1 |
| Gm44686 | 0.129421241 | -0.322806168 | 0.175 | 0.226 | 1 |
| Slc25a17 | 0.132630751 | -0.286633051 | 0.081 | 0.119 | 1 |
| Plk2 | 0.132973381 | -0.298559246 | 0.111 | 0.155 | 1 |
| Cep83 | 0.133899907 | -0.253537842 | 0.175 | 0.222 | 1 |
| Ptpn5 | 0.134259126 | -0.3421023 | 0.162 | 0.202 | 1 |
| Esrrg | 0.13462874 | -0.318904271 | 0.209 | 0.266 | 1 |
| Uri1 | 0.136084496 | 0.258301928 | 0.201 | 0.151 | 1 |
| Pik3c2a | 0.136502246 | -0.301069675 | 0.188 | 0.238 | 1 |
| Aig1 | 0.136603205 | -0.296048446 | 0.137 | 0.183 | 1 |
| Gm45881 | 0.137277021 | -0.251040361 | 0.094 | 0.135 | 1 |
| Snx10 | 0.137716752 | -0.254161565 | 0.171 | 0.214 | 1 |
| 4930509J09Rik | 0.137891122 | -0.25449833 | 0.12 | 0.167 | 1 |
| Mthfd2l | 0.138743602 | 0.254313829 | 0.239 | 0.187 | 1 |
| Adcy2 | 0.140601326 | 0.439167545 | 0.205 | 0.163 | 1 |
| Itm2b | 0.140814395 | -0.250748977 | 0.363 | 0.405 | 1 |
| Gabrg2 | 0.140880038 | -0.285700276 | 0.265 | 0.317 | 1 |
| AC126440.1 | 0.142879931 | -0.342494404 | 0.205 | 0.25 | 1 |
| Oprm1 | 0.14693843 | -0.269825628 | 0.085 | 0.123 | 1 |
| Dnajc5 | 0.147092235 | 0.270361314 | 0.252 | 0.202 | 1 |
| Fkbp1a | 0.148561462 | -0.262054786 | 0.248 | 0.294 | 1 |
| B020031H02Rik | 0.150685414 | -0.34689005 | 0.261 | 0.31 | 1 |
| Enox2 | 0.156367918 | 0.25457072 | 0.154 | 0.111 | 1 |
| Nalcn | 0.156851129 | -0.354972262 | 0.308 | 0.349 | 1 |
| Reep3 | 0.157792454 | 0.253708421 | 0.235 | 0.187 | 1 |
| Smurf2 | 0.158665244 | -0.257198273 | 0.368 | 0.413 | 1 |
| Rab30 | 0.160032936 | 0.269281723 | 0.329 | 0.274 | 1 |
| Syn1 | 0.160233317 | -0.292935991 | 0.265 | 0.306 | 1 |
| Rbmx | 0.161679176 | -0.268217886 | 0.265 | 0.313 | 1 |
| Plekhm3 | 0.163353819 | 0.267112808 | 0.321 | 0.274 | 1 |
| Tenm3 | 0.164837113 | -0.312256688 | 0.457 | 0.484 | 1 |
| Ptpro | 0.166278982 | -0.253568354 | 0.226 | 0.278 | 1 |
| Apaf1 | 0.16681363 | 0.253445738 | 0.137 | 0.099 | 1 |
| Rnf41 | 0.167309842 | 0.25941666 | 0.145 | 0.107 | 1 |
| Ppp1cb | 0.169018036 | -0.363978749 | 0.333 | 0.361 | 1 |
| Mapk8 | 0.169217163 | -0.339064866 | 0.316 | 0.345 | 1 |
| Dner | 0.177965183 | -0.317311997 | 0.184 | 0.226 | 1 |
| Cttnbp2 | 0.178989612 | -0.278720455 | 0.538 | 0.607 | 1 |
| Klhl2 | 0.179262806 | -0.323286661 | 0.252 | 0.298 | 1 |
| Chd7 | 0.181028114 | 0.257496673 | 0.483 | 0.425 | 1 |
| Rnaseh2b | 0.181277104 | 0.252854904 | 0.128 | 0.091 | 1 |
| Ddx24 | 0.183137349 | -0.255074937 | 0.248 | 0.294 | 1 |
| Epha6 | 0.186743752 | -0.47181992 | 0.5 | 0.512 | 1 |
| Brd2 | 0.186993025 | -0.314373089 | 0.073 | 0.103 | 1 |
| Hpcal4 | 0.18955702 | -0.293651174 | 0.077 | 0.107 | 1 |
| Nrg2 | 0.191557658 | -0.28299129 | 0.154 | 0.194 | 1 |
| Luzp2 | 0.194523321 | 0.35936109 | 0.479 | 0.444 | 1 |
| Pls3 | 0.195359021 | -0.256473017 | 0.081 | 0.115 | 1 |
| Eif4e | 0.19704679 | -0.282771924 | 0.137 | 0.175 | 1 |
| Grm7 | 0.200671732 | -0.324455324 | 0.513 | 0.552 | 1 |
| Atxn1 | 0.205281032 | 0.272050522 | 0.509 | 0.48 | 1 |
| Otud4 | 0.212560869 | -0.267897678 | 0.15 | 0.187 | 1 |
| Gspt1 | 0.214161721 | -0.303645937 | 0.124 | 0.155 | 1 |
| Cltc | 0.218045402 | -0.262652201 | 0.303 | 0.333 | 1 |
| Il1rapl2 | 0.222179332 | -0.837093403 | 0.098 | 0.131 | 1 |
| Eml6 | 0.224984824 | -0.306072031 | 0.329 | 0.365 | 1 |
| Gm15398 | 0.225217052 | -0.39547533 | 0.128 | 0.163 | 1 |
| Selenoi | 0.226365272 | -0.30440712 | 0.137 | 0.171 | 1 |
| Akap13 | 0.231820485 | 0.252537441 | 0.167 | 0.131 | 1 |
| Ptprk | 0.23462108 | -0.546861436 | 0.09 | 0.119 | 1 |
| Mta3 | 0.246915942 | 0.275253451 | 0.154 | 0.123 | 1 |
| Tmem158 | 0.251613556 | -0.263089189 | 0.235 | 0.266 | 1 |
| Htr1f | 0.254380079 | 0.298294219 | 0.145 | 0.111 | 1 |
| Gdpd1 | 0.258913034 | -0.271421219 | 0.282 | 0.313 | 1 |
| Ccdc138 | 0.259349588 | 0.251684244 | 0.103 | 0.075 | 1 |
| Gap43 | 0.262653725 | -0.296313513 | 0.252 | 0.282 | 1 |
| Ror2 | 0.268237807 | -0.274723307 | 0.077 | 0.103 | 1 |
| Gm11149 | 0.275499237 | -0.287142997 | 0.38 | 0.397 | 1 |
| Rbm18 | 0.279009225 | -0.261303009 | 0.081 | 0.107 | 1 |
| Cacna1e | 0.280798651 | -0.3328275 | 0.235 | 0.266 | 1 |
| Rnf122 | 0.283784243 | 0.250179078 | 0.137 | 0.111 | 1 |
| Grin1 | 0.288388284 | 0.253286724 | 0.291 | 0.25 | 1 |
| Pde1a | 0.290685586 | 0.296300892 | 0.158 | 0.127 | 1 |
| Cyhr1 | 0.296433804 | -0.28246603 | 0.103 | 0.127 | 1 |
| Zbtb11 | 0.296640134 | -0.342131953 | 0.167 | 0.19 | 1 |
| Dpp10 | 0.303645012 | -0.445368764 | 0.444 | 0.46 | 1 |
| Lgr4 | 0.312468197 | -0.271483596 | 0.098 | 0.123 | 1 |
| Fbxo42 | 0.316053713 | -0.276119137 | 0.115 | 0.139 | 1 |
| Nsmaf | 0.332566518 | -0.258114677 | 0.188 | 0.214 | 1 |
| Gm20754 | 0.336862512 | -0.430994236 | 0.423 | 0.448 | 1 |
| Stxbp6 | 0.339833398 | -0.320784968 | 0.09 | 0.111 | 1 |
| Cdh4 | 0.355789223 | -0.327562489 | 0.115 | 0.139 | 1 |
| Kcnrg | 0.364853622 | -0.267721938 | 0.098 | 0.119 | 1 |
| Aff2 | 0.376376096 | -0.369688663 | 0.09 | 0.111 | 1 |
| Ccdc85a | 0.378081062 | -0.26888496 | 0.103 | 0.123 | 1 |
| Snap47 | 0.382970623 | -0.273169437 | 0.128 | 0.151 | 1 |
| Fhit | 0.397616129 | -0.356384851 | 0.197 | 0.222 | 1 |
| Thsd7b | 0.399093217 | -0.611514298 | 0.103 | 0.123 | 1 |
| Cacnb2 | 0.403559964 | -0.270487363 | 0.47 | 0.476 | 1 |
| Otud7a | 0.407912306 | -0.342265522 | 0.248 | 0.266 | 1 |
| Galnt17 | 0.418538057 | -0.259406872 | 0.197 | 0.214 | 1 |
| Tmod2 | 0.430823548 | -0.26005128 | 0.248 | 0.262 | 1 |
| Oxr1 | 0.432069663 | -0.556369545 | 0.265 | 0.278 | 1 |
| 4933434E20Rik | 0.436209262 | -0.254269415 | 0.197 | 0.21 | 1 |
| Vcp | 0.437779114 | -0.298710647 | 0.188 | 0.202 | 1 |
| Egfem1 | 0.472518724 | -0.300992746 | 0.205 | 0.226 | 1 |
| Kcnj3 | 0.472878065 | -0.306335113 | 0.252 | 0.266 | 1 |
| Scoc | 0.47459549 | -0.255686537 | 0.124 | 0.139 | 1 |
| Syt6 | 0.499033655 | -0.323459376 | 0.261 | 0.27 | 1 |
| Ephb1 | 0.499401211 | -0.349675263 | 0.252 | 0.266 | 1 |
| Dchs2 | 0.524557208 | -0.275583985 | 0.265 | 0.274 | 1 |
| Hs3st4 | 0.562581291 | -0.328292359 | 0.141 | 0.155 | 1 |
| Kctd16 | 0.631399025 | -0.327154503 | 0.252 | 0.258 | 1 |
| Sema6a | 0.665842092 | -0.25017592 | 0.167 | 0.175 | 1 |
| Cdh8 | 0.805885398 | -0.251660344 | 0.427 | 0.413 | 1 |
| Nxph1 | 0.832200804 | -0.322519991 | 0.372 | 0.361 | 1 |
| Zfhx4 | 0.910544121 | -0.336979192 | 0.244 | 0.23 | 1 |

| **Supplemental Table S6. Differentially expressed genes in each NSC & astrocyte sub-type generated comparing the control and the mTBI SVZ, related to Figure 4. (Late aNSCs DEGs)** | | | | | |
| --- | --- | --- | --- | --- | --- |
| Column1 | p_val | avg_log2FC | pct.1 | pct.2 | p_val_adj |
| Gm42418 | 4.72841E-08 | 0.672919012 | 1 | 1 | 0.001073963 |
| Plekha5 | 0.000118565 | 0.708261571 | 0.78 | 0.629 | 1 |
| Zc3h13 | 0.000130624 | -0.796784875 | 0.242 | 0.543 | 1 |
| Mex3a | 0.000137218 | 0.794369357 | 0.297 | 0.057 | 1 |
| Tac1 | 0.000154449 | -0.807628769 | 0.198 | 0.486 | 1 |
| Togaram1 | 0.000276922 | 0.840076299 | 0.429 | 0.186 | 1 |
| Kat7 | 0.000381443 | 0.667572706 | 0.341 | 0.1 | 1 |
| Gm15810 | 0.000459717 | -0.439416564 | 0 | 0.129 | 1 |
| Plp1 | 0.000467953 | 0.675256644 | 0.923 | 0.743 | 1 |
| Eif5a | 0.000503931 | -0.519272225 | 0.044 | 0.229 | 1 |
| Pigf | 0.0005482 | -0.605620878 | 0.011 | 0.157 | 1 |
| Gm26936 | 0.000678798 | -0.628642277 | 0.374 | 0.614 | 1 |
| A430106G13Rik | 0.000693112 | -0.486445858 | 0.088 | 0.3 | 1 |
| Uhmk1 | 0.000832574 | 0.566017016 | 0.209 | 0.029 | 1 |
| Slc48a1 | 0.000885912 | 0.506316146 | 0.176 | 0.014 | 1 |
| Tex2 | 0.000987295 | 0.540512326 | 0.231 | 0.043 | 1 |
| Oprm1 | 0.000995068 | -0.408567966 | 0 | 0.114 | 1 |
| Ubald2 | 0.001013791 | -0.540231116 | 0.044 | 0.214 | 1 |
| Dync2h1 | 0.001025014 | 0.722421867 | 0.56 | 0.343 | 1 |
| Cobll1 | 0.001036181 | 0.463285275 | 0.143 | 0 | 1 |
| Calm1 | 0.001073185 | -0.692304543 | 0.352 | 0.614 | 1 |
| Ubxn2b | 0.001178364 | -0.430947052 | 0.044 | 0.214 | 1 |
| St8sia2 | 0.001315658 | -0.818648222 | 0.11 | 0.314 | 1 |
| Hint1 | 0.001468878 | 0.577487168 | 0.352 | 0.129 | 1 |
| Trappc9 | 0.001707662 | 0.549173217 | 0.527 | 0.286 | 1 |
| Slc9a8 | 0.001780745 | 0.637932924 | 0.352 | 0.143 | 1 |
| Rnf145 | 0.001827119 | 0.745902134 | 0.33 | 0.129 | 1 |
| 1700109H08Rik | 0.001827617 | 0.442961467 | 0.165 | 0.014 | 1 |
| Gm13584 | 0.002147713 | -0.426671981 | 0 | 0.1 | 1 |
| B3galt5 | 0.002147713 | -0.336390629 | 0 | 0.1 | 1 |
| Emc4 | 0.002442546 | -0.705779791 | 0.044 | 0.186 | 1 |
| Tvp23a | 0.002476202 | -0.507190785 | 0.033 | 0.171 | 1 |
| Odf2 | 0.002572447 | 0.719070762 | 0.484 | 0.257 | 1 |
| Kcnh5 | 0.002652232 | 0.509782917 | 0.275 | 0.086 | 1 |
| Ilf3 | 0.002800355 | -0.664989677 | 0.33 | 0.543 | 1 |
| Arf3 | 0.002891891 | -0.543691686 | 0.231 | 0.443 | 1 |
| Cmss1 | 0.003160574 | 0.347103032 | 0.967 | 0.914 | 1 |
| Fam98a | 0.003250253 | -0.389356924 | 0.055 | 0.214 | 1 |
| Psma2 | 0.003410638 | -0.5620529 | 0.044 | 0.186 | 1 |
| Matr3 | 0.003571101 | -0.414738889 | 0.451 | 0.7 | 1 |
| Cops2 | 0.004104699 | -0.583889201 | 0.121 | 0.3 | 1 |
| Bmpr2 | 0.004161792 | 0.491515662 | 0.681 | 0.457 | 1 |
| Arhgap39 | 0.004260082 | 0.430525777 | 0.429 | 0.214 | 1 |
| Ppp2r1a | 0.004299985 | -0.598863027 | 0.077 | 0.229 | 1 |
| Cdkn2c | 0.004309689 | 0.523089528 | 0.165 | 0.029 | 1 |
| Rplp1 | 0.004367867 | -0.64588174 | 0.088 | 0.257 | 1 |
| Tctn1 | 0.004386414 | 0.365105843 | 0.11 | 0 | 1 |
| Slc17a5 | 0.004403834 | 0.594037241 | 0.253 | 0.086 | 1 |
| Ascl1 | 0.004485311 | 0.627789056 | 0.187 | 0.043 | 1 |
| Scn2a | 0.004490279 | -0.59997713 | 0.209 | 0.414 | 1 |
| Gm16599 | 0.004492591 | -0.486715727 | 0.297 | 0.529 | 1 |
| 4930556N13Rik | 0.00452006 | -0.333183797 | 0.011 | 0.114 | 1 |
| Shtn1 | 0.004527808 | -0.802804379 | 0.308 | 0.529 | 1 |
| Olfm2 | 0.004766377 | 0.499229502 | 0.143 | 0.014 | 1 |
| Strn3 | 0.004932924 | -0.513443357 | 0.714 | 0.829 | 1 |
| Capzb | 0.004968689 | -0.480107942 | 0.11 | 0.286 | 1 |
| Cpne5 | 0.00497794 | -0.501456444 | 0.033 | 0.157 | 1 |
| Nprl3 | 0.004989455 | 0.585577192 | 0.231 | 0.071 | 1 |
| Sema5b | 0.005075518 | 0.783704706 | 0.604 | 0.414 | 1 |
| Atp9b | 0.005075554 | 0.553633739 | 0.637 | 0.371 | 1 |
| Phyhip | 0.005165005 | -0.354115649 | 0.011 | 0.114 | 1 |
| Wdr43 | 0.005206132 | -0.524262014 | 0.11 | 0.286 | 1 |
| Btg2 | 0.005273201 | 0.7938523 | 0.264 | 0.1 | 1 |
| Sez6l2 | 0.005426729 | -0.452303252 | 0.033 | 0.157 | 1 |
| Pcdh15 | 0.005686025 | 1.081428233 | 0.319 | 0.143 | 1 |
| Fhl1 | 0.005918441 | 0.484667591 | 0.165 | 0.029 | 1 |
| Cdk5rap2 | 0.006334991 | 0.493778364 | 0.659 | 0.529 | 1 |
| Stx8 | 0.006522454 | 0.597144944 | 0.418 | 0.229 | 1 |
| Mir9-3hg | 0.006564614 | 0.473216969 | 0.879 | 0.757 | 1 |
| Rimklb | 0.006644133 | 0.622976457 | 0.516 | 0.329 | 1 |
| Ntng2 | 0.00688264 | 0.731483257 | 0.286 | 0.114 | 1 |
| Fmnl2 | 0.006976802 | -0.466444724 | 0.593 | 0.8 | 1 |
| Rab10os | 0.007252088 | 0.401535719 | 0.132 | 0.014 | 1 |
| Gm17058 | 0.007315833 | -0.524409054 | 0.022 | 0.129 | 1 |
| Epb41l1 | 0.007580076 | -0.332240075 | 0.044 | 0.171 | 1 |
| Gm10684 | 0.007843711 | -0.395151907 | 0.022 | 0.129 | 1 |
| Ndrg4 | 0.007884512 | -0.541097154 | 0.484 | 0.657 | 1 |
| Sun2 | 0.008023154 | 0.593566561 | 0.242 | 0.086 | 1 |
| Arxes2 | 0.008027107 | -0.496702927 | 0.022 | 0.129 | 1 |
| Tbc1d31 | 0.008499332 | 0.475656782 | 0.505 | 0.329 | 1 |
| Hpcal4 | 0.008518148 | -0.380768807 | 0.044 | 0.171 | 1 |
| Slc25a46 | 0.008518148 | 0.438035342 | 0.154 | 0.029 | 1 |
| Smarca5 | 0.008519945 | 0.468612561 | 0.462 | 0.257 | 1 |
| Lca5 | 0.008567941 | 0.4377556 | 0.253 | 0.086 | 1 |
| Sergef | 0.008660888 | 0.599138039 | 0.297 | 0.129 | 1 |
| Vdac2 | 0.008702146 | -0.519094309 | 0.154 | 0.329 | 1 |
| Mast4 | 0.008765124 | 0.6412502 | 0.341 | 0.171 | 1 |
| Slc7a4 | 0.00879968 | -0.33626017 | 0.022 | 0.129 | 1 |
| Bbs4 | 0.008853159 | 0.397318379 | 0.154 | 0.029 | 1 |
| Trp53 | 0.009187661 | 0.438858707 | 0.176 | 0.043 | 1 |
| 4930557K07Rik | 0.009259757 | -0.437675761 | 0.055 | 0.186 | 1 |
| Zdhhc18 | 0.009377762 | 0.392722685 | 0.154 | 0.029 | 1 |
| Ano4 | 0.009377762 | 0.414397743 | 0.154 | 0.029 | 1 |
| Cct7 | 0.009381373 | -0.494734095 | 0.066 | 0.2 | 1 |
| Coro7 | 0.009955254 | -0.40335324 | 0.055 | 0.186 | 1 |
| Rpf1 | 0.009981195 | -0.424423028 | 0.011 | 0.1 | 1 |
| Dusp3 | 0.009981195 | -0.271330941 | 0.011 | 0.1 | 1 |
| St8sia3os | 0.009981195 | -0.395363454 | 0.011 | 0.1 | 1 |
| Ecd | 0.010262321 | 0.445665789 | 0.264 | 0.1 | 1 |
| Ubl5 | 0.010289468 | -0.372635692 | 0.033 | 0.143 | 1 |
| Clptm1l | 0.010321327 | 0.408223295 | 0.121 | 0.014 | 1 |
| Dhx29 | 0.010321327 | 0.378932991 | 0.121 | 0.014 | 1 |
| Bnip1 | 0.010321327 | 0.336908093 | 0.121 | 0.014 | 1 |
| Socs4 | 0.010381077 | -0.485434359 | 0.099 | 0.243 | 1 |
| Kcnq4 | 0.010507029 | 0.793624959 | 0.165 | 0.043 | 1 |
| Cbarp | 0.010510859 | 0.341650126 | 0.154 | 0.029 | 1 |
| Ahi1 | 0.010628068 | 0.516620491 | 0.714 | 0.529 | 1 |
| Shisa4 | 0.011000742 | 0.550417636 | 0.242 | 0.086 | 1 |
| Zbtb11 | 0.011006578 | -0.625198708 | 0.154 | 0.3 | 1 |
| Hdgfl3 | 0.011175554 | 0.382220941 | 0.648 | 0.414 | 1 |
| Traf5 | 0.011410893 | -0.512452591 | 0.033 | 0.143 | 1 |
| Plxna4 | 0.011430561 | -0.797946351 | 0.264 | 0.443 | 1 |
| Sppl2b | 0.011490052 | 0.354503614 | 0.121 | 0.014 | 1 |
| Kcnip4 | 0.011519996 | 0.416806377 | 0.868 | 0.743 | 1 |
| Gm35040 | 0.011543291 | 0.45224955 | 0.143 | 0.029 | 1 |
| Rasd2 | 0.011719998 | -0.372405696 | 0.066 | 0.2 | 1 |
| Pdzd11 | 0.011737419 | 0.394510371 | 0.121 | 0.014 | 1 |
| Rragb | 0.011826328 | 0.449338915 | 0.319 | 0.129 | 1 |
| Nadk2 | 0.011840544 | 0.45821561 | 0.242 | 0.086 | 1 |
| Hs6st3 | 0.011930249 | 0.473364961 | 0.385 | 0.2 | 1 |
| Ube2r2 | 0.011943579 | -0.434657273 | 0.44 | 0.614 | 1 |
| Lars2 | 0.012153137 | 0.647309439 | 0.484 | 0.314 | 1 |
| Rnaseh2a | 0.012246366 | 0.344941836 | 0.121 | 0.014 | 1 |
| Anapc1 | 0.012325344 | 0.526642804 | 0.396 | 0.229 | 1 |
| Atp6v0e | 0.012329083 | 0.426805217 | 0.165 | 0.043 | 1 |
| Ipo7 | 0.01241487 | -0.369520893 | 0.209 | 0.386 | 1 |
| Mex3c | 0.01262235 | 0.474728404 | 0.297 | 0.129 | 1 |
| Dbp | 0.012754779 | -0.417448628 | 0.088 | 0.229 | 1 |
| Aktip | 0.012754779 | -0.467615793 | 0.088 | 0.229 | 1 |
| B3gat1 | 0.012948719 | 0.559253095 | 0.187 | 0.057 | 1 |
| Fam8a1 | 0.013090869 | 0.418316307 | 0.231 | 0.086 | 1 |
| Mrpl4 | 0.013446982 | 0.37011494 | 0.143 | 0.029 | 1 |
| Mrps9 | 0.013455731 | 0.500871362 | 0.308 | 0.143 | 1 |
| Crebzf | 0.013494412 | 0.464721205 | 0.319 | 0.143 | 1 |
| Tmtc2 | 0.013606162 | -0.596023919 | 0.549 | 0.671 | 1 |
| Sdhaf4 | 0.013983943 | -0.44530051 | 0.022 | 0.114 | 1 |
| Zfhx4 | 0.013990947 | -0.853873261 | 0.352 | 0.514 | 1 |
| Capza1 | 0.014041375 | 0.489591812 | 0.451 | 0.257 | 1 |
| Elavl1 | 0.014093462 | -0.372290047 | 0.363 | 0.571 | 1 |
| Mecr | 0.014183181 | 0.43121849 | 0.253 | 0.1 | 1 |
| Orc5 | 0.014218885 | 0.558190421 | 0.385 | 0.214 | 1 |
| Sptbn2 | 0.01446943 | -0.468422005 | 0.055 | 0.171 | 1 |
| Gpr107 | 0.0145343 | 0.476968777 | 0.352 | 0.186 | 1 |
| Actb | 0.014568118 | -0.599948793 | 0.626 | 0.729 | 1 |
| Pfkp | 0.014773107 | 0.426459855 | 0.143 | 0.029 | 1 |
| Cars | 0.014927846 | 0.625124722 | 0.231 | 0.086 | 1 |
| Hes6 | 0.014985289 | 0.520470251 | 0.187 | 0.057 | 1 |
| Lrp5 | 0.015098816 | 0.493170998 | 0.209 | 0.071 | 1 |
| Mphosph10 | 0.015192806 | -0.410923426 | 0.044 | 0.157 | 1 |
| Dchs1 | 0.015192806 | -0.39532866 | 0.044 | 0.157 | 1 |
| Srp9 | 0.015329385 | -0.399444836 | 0.077 | 0.214 | 1 |
| Pcdh7 | 0.015434952 | 0.562754983 | 0.374 | 0.2 | 1 |
| Wdr92 | 0.015768718 | -0.37197518 | 0.044 | 0.157 | 1 |
| Polr2f | 0.015986427 | 0.346095998 | 0.11 | 0.014 | 1 |
| Gm17590 | 0.01600653 | -0.366434567 | 0.022 | 0.114 | 1 |
| App | 0.016023281 | -0.505509114 | 0.692 | 0.786 | 1 |
| Fads2 | 0.016145092 | 0.387225197 | 0.33 | 0.157 | 1 |
| Dsn1 | 0.01626771 | 0.380795471 | 0.165 | 0.043 | 1 |
| Slc39a9 | 0.016490834 | 0.549581346 | 0.22 | 0.086 | 1 |
| Ofd1 | 0.01651555 | 0.25757277 | 0.143 | 0.029 | 1 |
| Zfp81 | 0.016682496 | 0.448030133 | 0.11 | 0.014 | 1 |
| Trak2 | 0.016731989 | 0.506391345 | 0.22 | 0.086 | 1 |
| Ndufb9 | 0.016735687 | -0.311039467 | 0.022 | 0.114 | 1 |
| Cenpm | 0.016988246 | 0.451607351 | 0.231 | 0.086 | 1 |
| Zfp804b | 0.017135207 | 0.293731439 | 0.143 | 0.029 | 1 |
| Tbc1d15 | 0.017205649 | 0.460969247 | 0.275 | 0.129 | 1 |
| Tecpr2 | 0.017220104 | 0.587341834 | 0.308 | 0.157 | 1 |
| Dennd1b | 0.017331345 | 0.509026279 | 0.451 | 0.286 | 1 |
| Bicd2 | 0.017410555 | 0.333137867 | 0.165 | 0.043 | 1 |
| Nbr1 | 0.017607124 | -0.439395611 | 0.187 | 0.357 | 1 |
| Hnrnpdl | 0.017845473 | 0.501553942 | 0.516 | 0.386 | 1 |
| Camk1d | 0.017933468 | 0.371721389 | 0.747 | 0.6 | 1 |
| Tm2d1 | 0.018119463 | 0.507162026 | 0.275 | 0.129 | 1 |
| Dnajc3 | 0.018195286 | 0.425739359 | 0.242 | 0.1 | 1 |
| Jph4 | 0.0183515 | -0.280382519 | 0.088 | 0.229 | 1 |
| Myo5a | 0.018448683 | -0.471322488 | 0.516 | 0.657 | 1 |
| Kifc5b | 0.018467306 | 0.462245478 | 0.33 | 0.171 | 1 |
| Crtac1 | 0.018732591 | -0.709648632 | 0.099 | 0.229 | 1 |
| Rnf19a | 0.018775264 | 0.496219305 | 0.22 | 0.086 | 1 |
| Etfdh | 0.018877536 | 0.440630453 | 0.132 | 0.029 | 1 |
| Gm12064 | 0.01928429 | -0.504047527 | 0.099 | 0.229 | 1 |
| Arhgap12 | 0.019297348 | 0.627729588 | 0.505 | 0.371 | 1 |
| Sec62 | 0.019414719 | -0.440639797 | 0.363 | 0.529 | 1 |
| Ncapg2 | 0.019524369 | 0.453314794 | 0.538 | 0.357 | 1 |
| Dpp9 | 0.019596484 | 0.393269833 | 0.132 | 0.029 | 1 |
| Amy1 | 0.019694695 | 0.705339394 | 0.319 | 0.171 | 1 |
| 0610043K17Rik | 0.019964844 | 0.508884091 | 0.132 | 0.029 | 1 |
| Map2k2 | 0.020018975 | 0.498851768 | 0.242 | 0.1 | 1 |
| Ccdc6 | 0.020138457 | -0.504864452 | 0.099 | 0.229 | 1 |
| Anapc16 | 0.02016818 | 0.644821665 | 0.319 | 0.171 | 1 |
| Safb | 0.020315066 | 0.472171611 | 0.352 | 0.2 | 1 |
| Mospd1 | 0.020463049 | -0.337070212 | 0.033 | 0.129 | 1 |
| Cdh2 | 0.020593434 | -0.41823527 | 0.714 | 0.829 | 1 |
| Scn3a | 0.020641386 | -0.415641255 | 0.088 | 0.214 | 1 |
| Esco2 | 0.020678005 | 0.542469961 | 0.396 | 0.229 | 1 |
| Npy | 0.020719734 | -0.467888571 | 0.044 | 0.143 | 1 |
| Slc24a3 | 0.020738293 | -0.36035512 | 0.176 | 0.343 | 1 |
| Gipc1 | 0.02087383 | -0.377852916 | 0.033 | 0.129 | 1 |
| Hpca | 0.020933293 | -0.54261136 | 0.132 | 0.271 | 1 |
| Myo6 | 0.020992701 | 0.500032594 | 0.429 | 0.286 | 1 |
| Cd46 | 0.021131134 | 0.395722991 | 0.242 | 0.1 | 1 |
| Fancc | 0.021244367 | 0.371237029 | 0.396 | 0.214 | 1 |
| 3300002I08Rik | 0.021630346 | 0.477485627 | 0.253 | 0.114 | 1 |
| Prkdc | 0.021773592 | -0.653119968 | 0.264 | 0.429 | 1 |
| Ube2o | 0.022340072 | -0.294925728 | 0.11 | 0.257 | 1 |
| Gm40578 | 0.02246548 | 0.465797846 | 0.176 | 0.057 | 1 |
| Ppp3ca | 0.022626001 | -0.332709806 | 0.978 | 0.943 | 1 |
| Rnf34 | 0.022707156 | -0.392735384 | 0.077 | 0.2 | 1 |
| Sars | 0.022845702 | 0.427897736 | 0.187 | 0.071 | 1 |
| Ubc | 0.022960847 | 0.432451962 | 0.341 | 0.186 | 1 |
| Eif4e | 0.023311165 | -0.449496006 | 0.297 | 0.443 | 1 |
| Anp32e | 0.023367576 | -0.414604775 | 0.22 | 0.386 | 1 |
| 4932438A13Rik | 0.023397046 | 0.50076916 | 0.582 | 0.386 | 1 |
| Chd7 | 0.023415474 | 0.279884932 | 0.967 | 0.857 | 1 |
| Dpy19l4 | 0.023520567 | 0.518835275 | 0.352 | 0.2 | 1 |
| Manbal | 0.023908385 | 0.451407773 | 0.176 | 0.057 | 1 |
| Sdf2 | 0.023950202 | -0.394730496 | 0.077 | 0.2 | 1 |
| Gin1 | 0.02428143 | 0.422766811 | 0.176 | 0.057 | 1 |
| Gabrb3 | 0.024305664 | -0.380313479 | 0.659 | 0.857 | 1 |
| Fam222a | 0.024426778 | -0.351683905 | 0.033 | 0.129 | 1 |
| Rapgef5 | 0.024426778 | -0.286379133 | 0.033 | 0.129 | 1 |
| BC005624 | 0.024432761 | -0.452204144 | 0.044 | 0.143 | 1 |
| Rheb | 0.024587143 | -0.340976514 | 0.242 | 0.414 | 1 |
| Pex2 | 0.024624953 | 0.415276829 | 0.198 | 0.071 | 1 |
| Mcm4 | 0.024654537 | -0.420680981 | 0.044 | 0.143 | 1 |
| Ppp2cb | 0.02465951 | 0.352403107 | 0.176 | 0.057 | 1 |
| Dhx9 | 0.024689924 | -0.312191853 | 0.374 | 0.543 | 1 |
| Ubqln1 | 0.024783325 | -0.404615916 | 0.154 | 0.3 | 1 |
| Rras2 | 0.024905802 | -0.315216251 | 0.033 | 0.129 | 1 |
| Pde1b | 0.024960595 | -0.427933903 | 0.121 | 0.257 | 1 |
| Pla2g4c | 0.025103549 | -0.350250991 | 0.066 | 0.186 | 1 |
| Epdr1 | 0.025350237 | -0.369365638 | 0.088 | 0.214 | 1 |
| Abcc5 | 0.025394647 | 0.412168935 | 0.538 | 0.371 | 1 |
| Plxnb1 | 0.025430992 | 0.370996558 | 0.176 | 0.057 | 1 |
| Zfp318 | 0.025474033 | 0.459448531 | 0.275 | 0.129 | 1 |
| Gm10135 | 0.02579246 | -0.399609637 | 0.044 | 0.143 | 1 |
| Heatr5b | 0.025824504 | 0.324086898 | 0.176 | 0.057 | 1 |
| Slitrk4 | 0.025888299 | -0.263561809 | 0.033 | 0.129 | 1 |
| Dcun1d2 | 0.026353604 | 0.466132951 | 0.209 | 0.086 | 1 |
| Aspscr1 | 0.026627349 | 0.36155773 | 0.176 | 0.057 | 1 |
| Lrrc58 | 0.02692578 | -0.557529752 | 0.275 | 0.429 | 1 |
| Fzr1 | 0.026963766 | 0.31787373 | 0.154 | 0.043 | 1 |
| Cstf3 | 0.027113364 | -0.29662467 | 0.604 | 0.729 | 1 |
| Mdh2 | 0.02737201 | -0.449123415 | 0.11 | 0.243 | 1 |
| Nemp2 | 0.027408602 | 0.37163127 | 0.154 | 0.043 | 1 |
| Pde1c | 0.027696565 | 0.685632657 | 0.363 | 0.2 | 1 |
| Gm26917 | 0.028122529 | -0.28340235 | 0.286 | 0.471 | 1 |
| Prpsap1 | 0.028456965 | -0.365350854 | 0.066 | 0.171 | 1 |
| Dgkz | 0.028473508 | -0.405332404 | 0.055 | 0.157 | 1 |
| Smdt1 | 0.028479431 | 0.362402552 | 0.121 | 0.029 | 1 |
| Tia1 | 0.028602299 | -0.375255348 | 0.582 | 0.729 | 1 |
| Plpp3 | 0.028640237 | 0.504675454 | 0.571 | 0.4 | 1 |
| Fancd2 | 0.028834451 | 0.428692404 | 0.352 | 0.2 | 1 |
| Gm26691 | 0.029006338 | 0.429191818 | 0.121 | 0.029 | 1 |
| Hnrnph2 | 0.029029306 | -0.294990979 | 0.099 | 0.229 | 1 |
| Dot1l | 0.029046016 | 0.542467497 | 0.341 | 0.186 | 1 |
| Fmn2 | 0.029202244 | -0.446016391 | 0.637 | 0.8 | 1 |
| C79798 | 0.029259707 | -0.34681161 | 0.11 | 0.243 | 1 |
| Appl2 | 0.029521318 | 0.474640732 | 0.242 | 0.114 | 1 |
| Dync1li1 | 0.029714438 | -0.408574734 | 0.154 | 0.3 | 1 |
| Arhgap5 | 0.029792228 | 0.519258837 | 0.484 | 0.343 | 1 |
| Ubash3b | 0.029934636 | 0.445168916 | 0.231 | 0.1 | 1 |
| Eefsec | 0.030019771 | 0.459347977 | 0.341 | 0.186 | 1 |
| Nr1d1 | 0.030085366 | 0.408087002 | 0.121 | 0.029 | 1 |
| Pnpla7 | 0.030130858 | -0.336478537 | 0.143 | 0.286 | 1 |
| Cacnb3 | 0.030233964 | -0.364056567 | 0.022 | 0.1 | 1 |
| Cox6b1 | 0.030311477 | -0.41251524 | 0.066 | 0.171 | 1 |
| Prrc2a | 0.030449487 | 0.345554891 | 0.308 | 0.157 | 1 |
| Urb1 | 0.030637697 | 0.443769485 | 0.121 | 0.029 | 1 |
| 1110008L16Rik | 0.030665057 | 0.455911098 | 0.242 | 0.114 | 1 |
| Zfp365 | 0.030791012 | -0.359122242 | 0.066 | 0.171 | 1 |
| Hnrnpa0 | 0.030846244 | -0.45050768 | 0.198 | 0.357 | 1 |
| Thy1 | 0.030956477 | 0.420520882 | 0.286 | 0.143 | 1 |
| Map4k4 | 0.030987758 | 0.260675947 | 0.912 | 0.829 | 1 |
| Zfp157 | 0.031231569 | 0.470015507 | 0.429 | 0.286 | 1 |
| Paip2b | 0.031432629 | 0.437394208 | 0.165 | 0.057 | 1 |
| Edc4 | 0.031453544 | 0.412507615 | 0.143 | 0.043 | 1 |
| 4930549C15Rik | 0.031564617 | -0.427364808 | 0.022 | 0.1 | 1 |
| Srsf2 | 0.031763225 | 0.425916223 | 0.473 | 0.314 | 1 |
| Xpo5 | 0.031768522 | 0.326461896 | 0.121 | 0.029 | 1 |
| 4921511C10Rik | 0.031905544 | -0.319101649 | 0.044 | 0.143 | 1 |
| Vps35 | 0.031952023 | -0.353154564 | 0.187 | 0.343 | 1 |
| Supt16 | 0.032344543 | -0.531151743 | 0.264 | 0.429 | 1 |
| Ube2m | 0.032504612 | 0.36068779 | 0.143 | 0.043 | 1 |
| Heph | 0.032520602 | -0.395293689 | 0.066 | 0.171 | 1 |
| Gda | 0.032593432 | -0.466389898 | 0.11 | 0.229 | 1 |
| Eid1 | 0.032776154 | 0.419932179 | 0.231 | 0.1 | 1 |
| Sf1 | 0.032812885 | 0.468826289 | 0.429 | 0.286 | 1 |
| Uqcr10 | 0.032945189 | -0.367670247 | 0.022 | 0.1 | 1 |
| Gpm6a | 0.03297784 | -0.467046894 | 0.736 | 0.771 | 1 |
| Blm | 0.033279611 | 0.441213125 | 0.495 | 0.343 | 1 |
| Fkbp8 | 0.033364865 | -0.492491731 | 0.077 | 0.186 | 1 |
| Ikbkap | 0.033451595 | 0.451899482 | 0.275 | 0.143 | 1 |
| Ppp1cc | 0.03347085 | 0.431224776 | 0.33 | 0.2 | 1 |
| Mllt10 | 0.033502499 | 0.322106281 | 0.835 | 0.757 | 1 |
| Wbp1l | 0.03362927 | 0.339211073 | 0.231 | 0.1 | 1 |
| Gm17036 | 0.033654647 | -0.252566524 | 0.022 | 0.1 | 1 |
| Ptpn12 | 0.033735638 | 0.433893425 | 0.637 | 0.471 | 1 |
| Kcnc2 | 0.033792639 | 0.251789406 | 0.154 | 0.043 | 1 |
| Glod4 | 0.034137564 | 0.252944189 | 0.143 | 0.043 | 1 |
| Rgs8 | 0.03420202 | -0.258421771 | 0.044 | 0.143 | 1 |
| E2f7 | 0.034345961 | 0.376372367 | 0.44 | 0.286 | 1 |
| Aven | 0.034365052 | -0.45223731 | 0.077 | 0.186 | 1 |
| Cacng3 | 0.034697238 | -0.394662715 | 0.055 | 0.157 | 1 |
| Spata13 | 0.034855253 | 0.420341067 | 0.374 | 0.2 | 1 |
| Rnf157 | 0.03490928 | -0.352863463 | 0.385 | 0.571 | 1 |
| Calb1 | 0.035036866 | -0.606475356 | 0.154 | 0.271 | 1 |
| Uqcr11 | 0.035112827 | -0.250920536 | 0.022 | 0.1 | 1 |
| Slu7 | 0.035112827 | -0.366825661 | 0.022 | 0.1 | 1 |
| Lsm1 | 0.035151803 | -0.301924796 | 0.11 | 0.243 | 1 |
| Ssbp1 | 0.035268136 | 0.458694924 | 0.198 | 0.086 | 1 |
| Pfas | 0.035280865 | -0.482826963 | 0.11 | 0.229 | 1 |
| Clcn6 | 0.035320722 | 0.332844438 | 0.187 | 0.071 | 1 |
| Primpol | 0.035320722 | 0.439482809 | 0.187 | 0.071 | 1 |
| Polq | 0.035332645 | 0.45885555 | 0.473 | 0.357 | 1 |
| Adgrl1 | 0.035375422 | 0.448824361 | 0.418 | 0.257 | 1 |
| Abtb2 | 0.035420858 | 0.66008531 | 0.176 | 0.071 | 1 |
| Obsl1 | 0.035861921 | -0.255593348 | 0.022 | 0.1 | 1 |
| Snx30 | 0.036013543 | 0.398396876 | 0.165 | 0.057 | 1 |
| Tmod2 | 0.036121989 | 0.577497164 | 0.33 | 0.186 | 1 |
| Tbc1d5 | 0.036254224 | -0.453130444 | 0.516 | 0.657 | 1 |
| 4933427D14Rik | 0.036303447 | -0.431546043 | 0.121 | 0.243 | 1 |
| Atp1a1 | 0.036422587 | -0.441094548 | 0.165 | 0.3 | 1 |
| Kif22 | 0.036512439 | 0.349618563 | 0.275 | 0.143 | 1 |
| Pcif1 | 0.036766318 | 0.360508931 | 0.231 | 0.1 | 1 |
| Akr1a1 | 0.036766318 | -0.394001402 | 0.121 | 0.243 | 1 |
| Focad | 0.036879345 | 0.351086526 | 0.319 | 0.171 | 1 |
| Smco4 | 0.037009778 | -0.379260969 | 0.033 | 0.114 | 1 |
| Flrt1 | 0.037009778 | -0.50200019 | 0.033 | 0.114 | 1 |
| Grsf1 | 0.037310472 | 0.372802674 | 0.121 | 0.029 | 1 |
| Enpp5 | 0.037359235 | 0.375450332 | 0.187 | 0.071 | 1 |
| Atp2a2 | 0.037535956 | -0.42263809 | 0.582 | 0.714 | 1 |
| Vcp | 0.037692088 | 0.299212689 | 0.319 | 0.171 | 1 |
| Cap2 | 0.037762055 | -0.505891397 | 0.22 | 0.357 | 1 |
| Rab14 | 0.038096587 | -0.428932413 | 0.297 | 0.443 | 1 |
| Zcchc14 | 0.038307734 | -0.378149667 | 0.429 | 0.6 | 1 |
| Kif1b | 0.038566679 | 0.342199533 | 0.802 | 0.814 | 1 |
| Tgif2 | 0.038625926 | -0.294515891 | 0.077 | 0.186 | 1 |
| Thoc1 | 0.038651547 | -0.479264572 | 0.242 | 0.371 | 1 |
| Trappc8 | 0.038932072 | 0.396957312 | 0.44 | 0.286 | 1 |
| Med6 | 0.039129788 | 0.498551337 | 0.275 | 0.143 | 1 |
| Nhp2 | 0.039182451 | -0.412186508 | 0.033 | 0.114 | 1 |
| Lhfp | 0.039201767 | -0.788086171 | 0.121 | 0.229 | 1 |
| Wrn | 0.039440876 | 0.417206163 | 0.341 | 0.214 | 1 |
| Inpp5a | 0.039451864 | 0.488260703 | 0.22 | 0.1 | 1 |
| Hbp1 | 0.039490541 | 0.49525328 | 0.286 | 0.157 | 1 |
| Acvr1b | 0.039650384 | -0.280191547 | 0.121 | 0.243 | 1 |
| Rbm39 | 0.039676225 | 0.256020862 | 0.923 | 0.886 | 1 |
| C530008M17Rik | 0.039703706 | -0.280434215 | 0.615 | 0.771 | 1 |
| Hdac4 | 0.039772449 | 0.331068598 | 0.538 | 0.4 | 1 |
| Nt5c3 | 0.039786524 | -0.505493026 | 0.132 | 0.257 | 1 |
| March6 | 0.039898699 | -0.366972808 | 0.462 | 0.614 | 1 |
| Ogn | 0.039930339 | -0.468115243 | 0.033 | 0.114 | 1 |
| Gsk3a | 0.040180044 | -0.349260619 | 0.11 | 0.229 | 1 |
| Lzic | 0.040335612 | -0.428381879 | 0.077 | 0.186 | 1 |
| Pax6 | 0.04056942 | 0.436867596 | 0.253 | 0.129 | 1 |
| Syne1 | 0.04066703 | 0.388380379 | 0.385 | 0.243 | 1 |
| Dgke | 0.040738067 | 0.27856065 | 0.143 | 0.043 | 1 |
| Tmeff1 | 0.0408774 | -0.343206871 | 0.33 | 0.514 | 1 |
| Apbb2 | 0.040954484 | 0.588449666 | 0.451 | 0.314 | 1 |
| Camkk2 | 0.041096676 | -0.375022429 | 0.198 | 0.343 | 1 |
| Orc1 | 0.0417378 | 0.321178333 | 0.187 | 0.071 | 1 |
| 4833420G17Rik | 0.04183424 | 0.430261393 | 0.33 | 0.2 | 1 |
| Magt1 | 0.042029943 | -0.381033914 | 0.143 | 0.271 | 1 |
| Rab11fip3 | 0.042176816 | 0.369030604 | 0.56 | 0.386 | 1 |
| Brd2 | 0.042184674 | 0.388306698 | 0.297 | 0.157 | 1 |
| Bckdhb | 0.042214183 | -0.338827251 | 0.165 | 0.3 | 1 |
| Gm28153 | 0.042247055 | -0.274690788 | 0.033 | 0.114 | 1 |
| Nop2 | 0.042247055 | -0.353678492 | 0.033 | 0.114 | 1 |
| Chsy3 | 0.042439532 | 0.396343228 | 0.319 | 0.171 | 1 |
| Dscam | 0.042538741 | 0.792291981 | 0.198 | 0.086 | 1 |
| Mtch1 | 0.042864476 | 0.366569069 | 0.308 | 0.171 | 1 |
| Sgcb | 0.043110762 | 0.412729619 | 0.154 | 0.057 | 1 |
| Acsl3 | 0.04316258 | -0.456252675 | 0.209 | 0.357 | 1 |
| Gm1976 | 0.043281415 | -0.354517482 | 0.275 | 0.429 | 1 |
| Cacna2d2 | 0.04339264 | 0.370309736 | 0.143 | 0.043 | 1 |
| Zfp942 | 0.04339264 | 0.297638509 | 0.143 | 0.043 | 1 |
| Trpc4ap | 0.043470629 | -0.307190822 | 0.242 | 0.4 | 1 |
| Zeb1 | 0.04348692 | 0.267490664 | 0.934 | 0.943 | 1 |
| Zfyve16 | 0.043641271 | 0.350291627 | 0.22 | 0.1 | 1 |
| Cacna1d | 0.043709254 | 0.463511461 | 0.462 | 0.3 | 1 |
| Paqr3 | 0.0438539 | -0.272882857 | 0.033 | 0.114 | 1 |
| Mrpl48 | 0.04387998 | 0.513894155 | 0.132 | 0.043 | 1 |
| Hnrnpul1 | 0.043920851 | -0.449395889 | 0.341 | 0.486 | 1 |
| Med1 | 0.044184084 | -0.46223963 | 0.209 | 0.343 | 1 |
| Mbtd1 | 0.044192511 | 0.317130557 | 0.681 | 0.529 | 1 |
| Tmem237 | 0.044401191 | 0.348941786 | 0.176 | 0.071 | 1 |
| Nkap | 0.044401191 | 0.366136165 | 0.176 | 0.071 | 1 |
| Slc16a7 | 0.044413291 | 0.373170136 | 0.154 | 0.057 | 1 |
| Rab28 | 0.044649912 | 0.286175817 | 0.396 | 0.243 | 1 |
| Gm36992 | 0.044676485 | -0.251021625 | 0.033 | 0.114 | 1 |
| Arfrp1 | 0.044676485 | -0.320039877 | 0.033 | 0.114 | 1 |
| Pbx3 | 0.044937258 | -0.360584123 | 0.769 | 0.829 | 1 |
| BC030336 | 0.045047845 | 0.434358878 | 0.297 | 0.157 | 1 |
| Lzts1 | 0.045053147 | -0.500004127 | 0.22 | 0.357 | 1 |
| Txnl1 | 0.045076911 | -0.289358165 | 0.066 | 0.171 | 1 |
| Slc7a11 | 0.045153381 | 0.479766635 | 0.11 | 0.029 | 1 |
| Apod | 0.045153381 | 0.379769438 | 0.11 | 0.029 | 1 |
| Plcg1 | 0.045265087 | 0.546959066 | 0.396 | 0.257 | 1 |
| Nrxn3 | 0.045499402 | -0.437902159 | 0.989 | 1 | 1 |
| Nolc1 | 0.045571024 | -0.308371081 | 0.044 | 0.129 | 1 |
| Mfsd14b | 0.046022489 | 0.326350842 | 0.198 | 0.086 | 1 |
| Csad | 0.04636622 | 0.430763172 | 0.242 | 0.129 | 1 |
| Cntn4 | 0.046654534 | 0.475898307 | 0.385 | 0.243 | 1 |
| Atxn7 | 0.046926359 | 0.488450228 | 0.418 | 0.271 | 1 |
| Hspa8 | 0.046936883 | 0.328820942 | 0.484 | 0.343 | 1 |
| Fras1 | 0.047118131 | 0.370840512 | 0.154 | 0.057 | 1 |
| Snx3 | 0.047180424 | 0.484109457 | 0.396 | 0.271 | 1 |
| Crip2 | 0.047222719 | -0.299317438 | 0.033 | 0.114 | 1 |
| Cenpv | 0.04726962 | 0.376059208 | 0.33 | 0.186 | 1 |
| Grik3 | 0.047421571 | -0.422323574 | 0.121 | 0.243 | 1 |
| Ppm1e | 0.047425483 | -0.320552224 | 0.626 | 0.686 | 1 |
| Cep85 | 0.047433292 | 0.305377574 | 0.308 | 0.186 | 1 |
| Cdk6 | 0.047472068 | 0.298669493 | 0.703 | 0.529 | 1 |
| 4931440J10Rik | 0.047618561 | 0.300607659 | 0.11 | 0.029 | 1 |
| 2700038G22Rik | 0.047630696 | -0.319263004 | 0.132 | 0.257 | 1 |
| Smarcc1 | 0.047809308 | 0.370673429 | 0.736 | 0.6 | 1 |
| Phc1 | 0.047815587 | 0.427482712 | 0.154 | 0.057 | 1 |
| Slc25a16 | 0.047815587 | 0.326819787 | 0.154 | 0.057 | 1 |
| Gm5441 | 0.048199996 | -0.416334 | 0.121 | 0.229 | 1 |
| Gm11808 | 0.048218891 | -0.582693391 | 0.099 | 0.2 | 1 |
| Sdc3 | 0.048465031 | 0.357412999 | 0.11 | 0.029 | 1 |
| Wtap | 0.048709626 | -0.422293913 | 0.176 | 0.3 | 1 |
| Arhgap21 | 0.04870968 | 0.306854571 | 0.802 | 0.643 | 1 |
| Ppm1k | 0.048896258 | 0.33083837 | 0.176 | 0.071 | 1 |
| Kif5c | 0.048901652 | 0.477560564 | 0.462 | 0.314 | 1 |
| Eef1a1 | 0.049061014 | -0.289073106 | 0.549 | 0.729 | 1 |
| Chl1 | 0.049236549 | 0.336502673 | 0.154 | 0.057 | 1 |
| Adsl | 0.049324102 | 0.25835235 | 0.11 | 0.029 | 1 |
| Btbd8 | 0.049438576 | -0.361445054 | 0.143 | 0.257 | 1 |
| Calm3 | 0.049457833 | -0.516974441 | 0.132 | 0.243 | 1 |
| Pelp1 | 0.049521696 | -0.318362217 | 0.11 | 0.229 | 1 |
| Pced1b | 0.049568577 | 0.413709258 | 0.176 | 0.071 | 1 |
| Sdhaf2 | 0.04961645 | -0.273354464 | 0.044 | 0.129 | 1 |
| Rorb | 0.049679855 | 0.415865068 | 0.571 | 0.429 | 1 |
| Sirt7 | 0.049863252 | 0.400696375 | 0.132 | 0.043 | 1 |
| Adcy9 | 0.050050308 | -0.540000929 | 0.132 | 0.243 | 1 |
| Zfpm2 | 0.050054567 | 0.293861639 | 0.78 | 0.686 | 1 |
| Cep97 | 0.050117048 | -0.311090767 | 0.264 | 0.414 | 1 |
| Kcnab2 | 0.050195913 | 0.295936866 | 0.11 | 0.029 | 1 |
| C1galt1 | 0.050195913 | 0.268919384 | 0.11 | 0.029 | 1 |
| Cep41 | 0.050195913 | 0.280706773 | 0.11 | 0.029 | 1 |
| 0610010F05Rik | 0.050198902 | 0.336049352 | 0.363 | 0.214 | 1 |
| Cldn34c1 | 0.050277252 | 0.338707982 | 0.33 | 0.186 | 1 |
| Upp2 | 0.050352053 | -0.423962521 | 0.154 | 0.286 | 1 |
| Gmeb1 | 0.050413149 | 0.278599438 | 0.429 | 0.229 | 1 |
| Mcl1 | 0.050460675 | -0.282705483 | 0.044 | 0.129 | 1 |
| Syn1 | 0.050507385 | 0.316390896 | 0.264 | 0.129 | 1 |
| Fancm | 0.050518741 | -0.325855589 | 0.132 | 0.257 | 1 |
| Pigb | 0.050626013 | 0.333264795 | 0.22 | 0.1 | 1 |
| Mrgbp | 0.05065716 | 0.267705126 | 0.132 | 0.043 | 1 |
| Dbnl | 0.050692775 | 0.336347556 | 0.154 | 0.057 | 1 |
| Phldb2 | 0.050817467 | 0.644645731 | 0.187 | 0.086 | 1 |
| Pou3f2 | 0.05085384 | 0.397482585 | 0.495 | 0.329 | 1 |
| 2810403A07Rik | 0.051058742 | 0.471420975 | 0.484 | 0.357 | 1 |
| Prr5l | 0.051080603 | 0.350026626 | 0.11 | 0.029 | 1 |
| Fcho1 | 0.051080603 | 0.26924743 | 0.11 | 0.029 | 1 |
| Zcchc7 | 0.051164734 | -0.317750599 | 0.659 | 0.814 | 1 |
| Zc3h7a | 0.051323093 | 0.34816836 | 0.429 | 0.286 | 1 |
| Kdm2b | 0.051395687 | 0.380467182 | 0.451 | 0.3 | 1 |
| D5Ertd579e | 0.051695574 | -0.45989078 | 0.429 | 0.543 | 1 |
| Snrpd1 | 0.051816655 | -0.284174465 | 0.176 | 0.314 | 1 |
| Srpk2 | 0.051937608 | 0.395873348 | 0.692 | 0.614 | 1 |
| Mettl17 | 0.051978313 | 0.278102858 | 0.11 | 0.029 | 1 |
| Med24 | 0.05218491 | 0.334627071 | 0.154 | 0.057 | 1 |
| Slc39a3 | 0.052185262 | -0.310970546 | 0.044 | 0.129 | 1 |
| Mxra7 | 0.052276765 | 0.405220147 | 0.132 | 0.043 | 1 |
| Scrn1 | 0.05233588 | 0.316614622 | 0.176 | 0.071 | 1 |
| Zfp101 | 0.05233588 | 0.283446827 | 0.176 | 0.071 | 1 |
| Tipin | 0.052342743 | 0.53990433 | 0.396 | 0.271 | 1 |
| Pum1 | 0.052355198 | -0.255399721 | 0.736 | 0.814 | 1 |
| Aldoa | 0.052712475 | -0.485091477 | 0.275 | 0.414 | 1 |
| Stx7 | 0.053047542 | 0.341638278 | 0.176 | 0.071 | 1 |
| Mgat4a | 0.053065875 | -0.312475921 | 0.044 | 0.129 | 1 |
| Rhbdd1 | 0.053102669 | 0.297608558 | 0.132 | 0.043 | 1 |
| Rbm42 | 0.053102669 | 0.327963014 | 0.132 | 0.043 | 1 |
| Adam19 | 0.053102669 | 0.324239654 | 0.132 | 0.043 | 1 |
| Cr1l | 0.053186335 | -0.314411087 | 0.198 | 0.329 | 1 |
| Chchd6 | 0.053228007 | 0.392147801 | 0.264 | 0.143 | 1 |
| Ttf2 | 0.053767272 | 0.328785598 | 0.176 | 0.071 | 1 |
| Fbxo5 | 0.053901453 | 0.25182476 | 0.242 | 0.129 | 1 |
| Nrg3 | 0.053978319 | 0.582069265 | 0.571 | 0.443 | 1 |
| Zadh2 | 0.054048117 | 0.404976125 | 0.231 | 0.114 | 1 |
| Mapk10 | 0.054086448 | -0.27622253 | 0.352 | 0.514 | 1 |
| Nenf | 0.054310898 | -0.394806431 | 0.066 | 0.157 | 1 |
| Mfsd11 | 0.054335927 | 0.398829648 | 0.209 | 0.1 | 1 |
| Hmgb2 | 0.054372691 | 0.274275283 | 0.363 | 0.229 | 1 |
| Idh2 | 0.054455636 | 0.333822393 | 0.22 | 0.1 | 1 |
| Atxn7l3b | 0.054455636 | 0.332207303 | 0.22 | 0.1 | 1 |
| Rnd3 | 0.054576191 | -0.352234819 | 0.264 | 0.414 | 1 |
| Slc12a5 | 0.054577923 | -0.504618359 | 0.22 | 0.343 | 1 |
| Eloc | 0.054618791 | -0.287633716 | 0.088 | 0.2 | 1 |
| Nceh1 | 0.054750965 | 0.360395764 | 0.11 | 0.029 | 1 |
| Dip2b | 0.054866799 | -0.297219914 | 0.582 | 0.814 | 1 |
| Cenpu | 0.055006335 | 0.426025528 | 0.209 | 0.1 | 1 |
| Rsf1os2 | 0.05511666 | -0.323848984 | 0.066 | 0.157 | 1 |
| Opa3 | 0.055215229 | -0.378921217 | 0.055 | 0.143 | 1 |
| Ndrg3 | 0.055365967 | 0.437037023 | 0.319 | 0.2 | 1 |
| Nell1 | 0.055702162 | 0.290264094 | 0.11 | 0.029 | 1 |
| Herc3 | 0.055826831 | -0.415693278 | 0.187 | 0.314 | 1 |
| Wdr76 | 0.055971936 | -0.395251956 | 0.308 | 0.443 | 1 |
| Preb | 0.05598779 | 0.325609333 | 0.308 | 0.186 | 1 |
| D17Wsu92e | 0.056236091 | -0.582638286 | 0.264 | 0.357 | 1 |
| Tpp2 | 0.056758267 | 0.418433911 | 0.275 | 0.157 | 1 |
| Rsf1 | 0.05684728 | 0.303240119 | 0.747 | 0.657 | 1 |
| Hps5 | 0.057059058 | 0.337338058 | 0.209 | 0.1 | 1 |
| Nbea | 0.057458211 | -0.303004503 | 0.879 | 0.857 | 1 |
| Cdc14a | 0.057770809 | 0.26700722 | 0.429 | 0.286 | 1 |
| AI846148 | 0.057830938 | 0.354014091 | 0.187 | 0.086 | 1 |
| Mpc2 | 0.057842309 | -0.36062256 | 0.055 | 0.143 | 1 |
| Kif23 | 0.057861276 | 0.492836732 | 0.451 | 0.314 | 1 |
| Tada3 | 0.058290098 | 0.301685472 | 0.132 | 0.043 | 1 |
| Akt3 | 0.058346419 | 0.340620263 | 0.945 | 0.886 | 1 |
| BC034090 | 0.058525556 | 0.275730224 | 0.154 | 0.057 | 1 |
| Prex1 | 0.058525556 | 0.37810343 | 0.154 | 0.057 | 1 |
| Pip5k1c | 0.058647996 | 0.348972082 | 0.231 | 0.114 | 1 |
| Copz1 | 0.058779906 | -0.442144665 | 0.077 | 0.171 | 1 |
| Btf3l4 | 0.058798157 | 0.406780874 | 0.297 | 0.171 | 1 |
| Pprc1 | 0.058866894 | 0.35911092 | 0.143 | 0.057 | 1 |
| Cdk14 | 0.058899031 | -0.419835936 | 0.681 | 0.743 | 1 |
| Actr3 | 0.059087319 | -0.390210824 | 0.275 | 0.4 | 1 |
| Stxbp1 | 0.059271518 | 0.435606717 | 0.363 | 0.229 | 1 |
| Nkain1 | 0.059330923 | 0.269795382 | 0.231 | 0.114 | 1 |
| Gm48383 | 0.059650777 | -0.317904543 | 0.055 | 0.143 | 1 |
| Hspa5 | 0.059685903 | -0.319778648 | 0.231 | 0.371 | 1 |
| Metap2 | 0.06012257 | -0.361272001 | 0.242 | 0.386 | 1 |
| Ston2 | 0.060292056 | -0.421519809 | 0.121 | 0.229 | 1 |
| Pcdh11x | 0.060336571 | 0.593094587 | 0.505 | 0.4 | 1 |
| Psmd13 | 0.060502168 | -0.318442499 | 0.176 | 0.286 | 1 |
| Zfp943 | 0.060562648 | -0.283365241 | 0.121 | 0.243 | 1 |
| Exosc8 | 0.060568339 | 0.290012554 | 0.253 | 0.129 | 1 |
| Wdfy1 | 0.0610377 | 0.253461349 | 0.132 | 0.043 | 1 |
| St3gal3 | 0.061109492 | 0.349857585 | 0.341 | 0.2 | 1 |
| Cnbp | 0.061239072 | -0.45541608 | 0.308 | 0.443 | 1 |
| H2afy | 0.06133995 | 0.451556367 | 0.308 | 0.186 | 1 |
| Drd1 | 0.061340723 | -0.4844299 | 0.154 | 0.271 | 1 |
| Col5a2 | 0.061628807 | 0.468172249 | 0.187 | 0.086 | 1 |
| Col11a1 | 0.062274663 | 0.36440636 | 0.275 | 0.143 | 1 |
| Ctdspl | 0.062321748 | -0.558313119 | 0.242 | 0.357 | 1 |
| Gigyf1 | 0.062352692 | 0.406365533 | 0.253 | 0.143 | 1 |
| Ube3a | 0.062423285 | 0.351221838 | 0.681 | 0.643 | 1 |
| E4f1 | 0.062826582 | -0.311013445 | 0.066 | 0.157 | 1 |
| Cyb5a | 0.062826582 | -0.266684027 | 0.066 | 0.157 | 1 |
| Recql5 | 0.062907166 | 0.427939619 | 0.165 | 0.071 | 1 |
| Greb1l | 0.062969924 | -0.487976501 | 0.077 | 0.171 | 1 |
| Gcc2 | 0.063165232 | -0.432245269 | 0.275 | 0.386 | 1 |
| Mtus1 | 0.063212973 | 0.63239958 | 0.209 | 0.114 | 1 |
| Smarcc2 | 0.063416798 | -0.379446836 | 0.549 | 0.586 | 1 |
| Ccm2 | 0.063522319 | -0.509679995 | 0.308 | 0.429 | 1 |
| Aldh18a1 | 0.064366702 | 0.303626748 | 0.209 | 0.1 | 1 |
| Rb1cc1 | 0.064438363 | 0.38511173 | 0.582 | 0.429 | 1 |
| Eri2 | 0.064448476 | 0.437434809 | 0.275 | 0.157 | 1 |
| Cfl1 | 0.064568392 | -0.260978606 | 0.198 | 0.343 | 1 |
| Ddx27 | 0.064610438 | 0.317614996 | 0.165 | 0.071 | 1 |
| Exosc9 | 0.064610438 | 0.369583743 | 0.165 | 0.071 | 1 |
| Fis1 | 0.064655827 | -0.371657805 | 0.066 | 0.157 | 1 |
| Gm48765 | 0.064707599 | -0.269129236 | 0.143 | 0.271 | 1 |
| Pcsk7 | 0.064716724 | -0.428521848 | 0.121 | 0.229 | 1 |
| Gtf2a1 | 0.064769692 | -0.424124016 | 0.231 | 0.343 | 1 |
| Ddx5 | 0.064893982 | -0.265454977 | 0.769 | 0.829 | 1 |
| Zfp266 | 0.065054404 | -0.366648343 | 0.407 | 0.529 | 1 |
| Sox8 | 0.06513817 | 0.381160178 | 0.209 | 0.1 | 1 |
| Tpx2 | 0.065318941 | 0.401720443 | 0.451 | 0.3 | 1 |
| Trim3 | 0.065359554 | -0.25795161 | 0.055 | 0.143 | 1 |
| Acvr2b | 0.065471756 | -0.39758412 | 0.154 | 0.271 | 1 |
| Ap5m1 | 0.065479597 | -0.589060861 | 0.121 | 0.229 | 1 |
| Bcat1 | 0.065630853 | 0.387145746 | 0.187 | 0.086 | 1 |
| Babam1 | 0.065630853 | 0.33752759 | 0.187 | 0.086 | 1 |
| Ddx6 | 0.066067082 | 0.451850127 | 0.549 | 0.429 | 1 |
| Gtf3c3 | 0.066435154 | 0.254403081 | 0.176 | 0.071 | 1 |
| Rnf213 | 0.066456436 | 0.317305818 | 0.187 | 0.086 | 1 |
| Zfp212 | 0.067003962 | 0.435259474 | 0.143 | 0.057 | 1 |
| Asap2 | 0.067129034 | 0.366065804 | 0.473 | 0.343 | 1 |
| Hadha | 0.067218559 | -0.362485472 | 0.121 | 0.243 | 1 |
| Lrrn3 | 0.067481914 | -0.328732598 | 0.066 | 0.157 | 1 |
| Ubap1 | 0.067488807 | -0.342678425 | 0.209 | 0.343 | 1 |
| Rab2b | 0.067498447 | 0.348566929 | 0.209 | 0.1 | 1 |
| Rac1 | 0.067826875 | 0.28641386 | 0.319 | 0.186 | 1 |
| Knl1 | 0.067953065 | 0.271264221 | 0.582 | 0.471 | 1 |
| Lamtor3 | 0.068057579 | 0.290890801 | 0.121 | 0.043 | 1 |
| Ccdc66 | 0.06810649 | 0.398102044 | 0.341 | 0.214 | 1 |
| Sp3os | 0.068133271 | 0.407292488 | 0.187 | 0.086 | 1 |
| Gm26749 | 0.06825826 | -0.339899479 | 0.11 | 0.214 | 1 |
| Eif3c | 0.068320776 | -0.394009311 | 0.077 | 0.171 | 1 |
| Usp47 | 0.068460037 | -0.316648705 | 0.462 | 0.586 | 1 |
| Atp5c1 | 0.068668267 | -0.288105446 | 0.11 | 0.214 | 1 |
| Exd2 | 0.069405962 | -0.438513528 | 0.121 | 0.229 | 1 |
| Ptk7 | 0.069566717 | 0.389208885 | 0.22 | 0.114 | 1 |
| Rpl21 | 0.069722766 | -0.305737688 | 0.033 | 0.1 | 1 |
| Ccdc138 | 0.069795373 | 0.532147951 | 0.385 | 0.286 | 1 |
| Itsn2 | 0.069979808 | -0.292169489 | 0.264 | 0.414 | 1 |
| Stag1 | 0.070042856 | -0.281428674 | 0.901 | 0.9 | 1 |
| Zzef1 | 0.070103737 | 0.288919097 | 0.527 | 0.386 | 1 |
| Map4 | 0.070186103 | -0.262410921 | 0.505 | 0.686 | 1 |
| Acp2 | 0.070408864 | -0.284885797 | 0.066 | 0.157 | 1 |
| Psmd9 | 0.07071362 | 0.368695433 | 0.187 | 0.086 | 1 |
| Mpp3 | 0.070874072 | 0.315463762 | 0.165 | 0.071 | 1 |
| Gm20388 | 0.070958516 | -0.297355129 | 0.945 | 0.957 | 1 |
| 2410002F23Rik | 0.071225649 | 0.291060298 | 0.264 | 0.143 | 1 |
| Ap2a2 | 0.071310549 | -0.454812943 | 0.187 | 0.314 | 1 |
| Mtss1 | 0.071398639 | 0.42470105 | 0.56 | 0.443 | 1 |
| Ssu72 | 0.07159946 | -0.271161894 | 0.11 | 0.214 | 1 |
| Invs | 0.071714198 | 0.462937665 | 0.253 | 0.143 | 1 |
| Zmat2 | 0.071808237 | 0.370285855 | 0.165 | 0.071 | 1 |
| Bcl2l1 | 0.071915116 | -0.511433117 | 0.209 | 0.329 | 1 |
| Tbce | 0.072075747 | 0.36964169 | 0.341 | 0.214 | 1 |
| Lpgat1 | 0.07213737 | 0.324604799 | 0.363 | 0.229 | 1 |
| Sil1 | 0.07222387 | 0.347907698 | 0.44 | 0.286 | 1 |
| Zfr | 0.072569213 | -0.336853201 | 0.681 | 0.8 | 1 |
| Atl1 | 0.072610372 | 0.414202536 | 0.385 | 0.271 | 1 |
| 2810004N23Rik | 0.072840187 | 0.349871953 | 0.242 | 0.129 | 1 |
| Erc2 | 0.07301771 | -0.296263828 | 0.418 | 0.529 | 1 |
| R3hdm4 | 0.073060418 | -0.289554 | 0.077 | 0.171 | 1 |
| Nlrc4 | 0.073060418 | -0.3111856 | 0.077 | 0.171 | 1 |
| Nalcn | 0.073285282 | 0.299423096 | 0.396 | 0.271 | 1 |
| Arglu1 | 0.073463069 | 0.354952383 | 0.648 | 0.514 | 1 |
| Tifa | 0.073496086 | 0.366166724 | 0.121 | 0.043 | 1 |
| Gm48678 | 0.073629705 | 0.319118269 | 0.22 | 0.114 | 1 |
| Chst2 | 0.073706831 | 0.334495162 | 0.165 | 0.071 | 1 |
| Luzp2 | 0.0737554 | -0.396848212 | 0.33 | 0.486 | 1 |
| Utp18 | 0.073954435 | 0.34558716 | 0.143 | 0.057 | 1 |
| Cdk7 | 0.074486889 | 0.400429248 | 0.275 | 0.157 | 1 |
| Nars2 | 0.074580757 | -0.331161903 | 0.088 | 0.186 | 1 |
| Dll1 | 0.07462535 | 0.318572418 | 0.121 | 0.043 | 1 |
| Troap | 0.074670773 | 0.287360653 | 0.165 | 0.071 | 1 |
| Mrrf | 0.074671409 | 0.377411982 | 0.165 | 0.071 | 1 |
| Gm21954 | 0.074895863 | -0.283755061 | 0.033 | 0.1 | 1 |
| Hdgfl2 | 0.074993846 | 0.299573929 | 0.143 | 0.057 | 1 |
| Tbc1d4 | 0.075004553 | 0.311285333 | 0.209 | 0.1 | 1 |
| Rmdn3 | 0.075768749 | 0.310279339 | 0.121 | 0.043 | 1 |
| Arid3b | 0.075768749 | 0.336633554 | 0.121 | 0.043 | 1 |
| Spin1 | 0.07592507 | -0.38227752 | 0.242 | 0.357 | 1 |
| Mrpl15 | 0.076045157 | 0.355105365 | 0.143 | 0.057 | 1 |
| Zcchc8 | 0.076572752 | -0.373757586 | 0.286 | 0.4 | 1 |
| Tecpr1 | 0.076575304 | -0.250987725 | 0.066 | 0.157 | 1 |
| B020031H02Rik | 0.076575304 | -0.262478483 | 0.066 | 0.157 | 1 |
| Cdc26 | 0.077018052 | -0.525692761 | 0.132 | 0.229 | 1 |
| Hfm1 | 0.077138796 | 0.304383779 | 0.286 | 0.157 | 1 |
| Cnnm1 | 0.077597627 | -0.258497528 | 0.033 | 0.1 | 1 |
| Pnn | 0.077675457 | 0.364543735 | 0.352 | 0.229 | 1 |
| Slc35f1 | 0.077904224 | -0.331092626 | 0.593 | 0.729 | 1 |
| Syce2 | 0.078098434 | 0.317573067 | 0.121 | 0.043 | 1 |
| Trmu | 0.078098434 | 0.374355465 | 0.121 | 0.043 | 1 |
| Dtx1 | 0.078183847 | 0.380487855 | 0.143 | 0.057 | 1 |
| Tspyl1 | 0.07863334 | -0.399763624 | 0.088 | 0.171 | 1 |
| Fam19a5 | 0.078759285 | 0.310436615 | 0.22 | 0.114 | 1 |
| Smg1 | 0.078760486 | 0.326623798 | 0.604 | 0.414 | 1 |
| Gm15738 | 0.078977986 | -0.251327321 | 0.033 | 0.1 | 1 |
| Tenm3 | 0.079086775 | 0.407288841 | 0.681 | 0.614 | 1 |
| Hmgn1 | 0.079097655 | -0.322427062 | 0.132 | 0.243 | 1 |
| Scamp1 | 0.079259567 | -0.311015751 | 0.154 | 0.271 | 1 |
| Rcbtb2 | 0.0796253 | 0.292871566 | 0.385 | 0.257 | 1 |
| Nrg1 | 0.080021608 | -0.648559899 | 0.813 | 0.843 | 1 |
| Arv1 | 0.080022849 | 0.365921725 | 0.176 | 0.086 | 1 |
| Timm44 | 0.080371249 | 0.271291985 | 0.143 | 0.057 | 1 |
| Alg2 | 0.080378252 | -0.296212377 | 0.033 | 0.1 | 1 |
| Rsrc1 | 0.08046906 | -0.267425454 | 0.56 | 0.671 | 1 |
| B230118H07Rik | 0.080486106 | 0.272848996 | 0.121 | 0.043 | 1 |
| Fam196a | 0.080531913 | -0.44848399 | 0.132 | 0.229 | 1 |
| Epha3 | 0.0813362 | -0.455906955 | 0.516 | 0.657 | 1 |
| Pcbp2 | 0.081387074 | -0.397961121 | 0.549 | 0.686 | 1 |
| Ypel3 | 0.081431058 | 0.290746893 | 0.22 | 0.114 | 1 |
| Mtx3 | 0.081483448 | 0.265491433 | 0.143 | 0.057 | 1 |
| Nudcd1 | 0.081483537 | 0.398818051 | 0.198 | 0.1 | 1 |
| Gad1 | 0.081490358 | -0.410872026 | 0.352 | 0.471 | 1 |
| Zfp579 | 0.08170199 | 0.319668106 | 0.121 | 0.043 | 1 |
| Ptdss2 | 0.08170199 | 0.2845309 | 0.121 | 0.043 | 1 |
| Rnf165 | 0.08170719 | 0.364850264 | 0.352 | 0.214 | 1 |
| Chchd3 | 0.081841947 | -0.351224093 | 0.571 | 0.671 | 1 |
| Kif3b | 0.081847896 | 0.255704817 | 0.187 | 0.086 | 1 |
| Tead1 | 0.082017893 | 0.282532218 | 0.89 | 0.857 | 1 |
| Pml | 0.082121556 | -0.372192453 | 0.187 | 0.3 | 1 |
| 5730455P16Rik | 0.082268055 | -0.250394606 | 0.077 | 0.171 | 1 |
| Mecp2 | 0.08267477 | -0.369854623 | 0.407 | 0.514 | 1 |
| 3110039M20Rik | 0.082745333 | -0.321727127 | 0.286 | 0.429 | 1 |
| Gm3764 | 0.082790277 | 0.299494648 | 0.901 | 0.914 | 1 |
| Mapk3 | 0.082932733 | 0.257504046 | 0.121 | 0.043 | 1 |
| Shroom2 | 0.082983721 | -0.456982374 | 0.044 | 0.114 | 1 |
| Nars | 0.083178817 | 0.300839747 | 0.209 | 0.1 | 1 |
| Prmt7 | 0.083252762 | 0.288332913 | 0.22 | 0.114 | 1 |
| Sccpdh | 0.084178457 | 0.300919956 | 0.121 | 0.043 | 1 |
| Twsg1 | 0.084178457 | 0.317056914 | 0.121 | 0.043 | 1 |
| Ralgps2 | 0.084301275 | -0.357599141 | 0.209 | 0.314 | 1 |
| Ap3b1 | 0.084404866 | 0.251555873 | 0.549 | 0.443 | 1 |
| Agtpbp1 | 0.084414615 | -0.317766027 | 0.297 | 0.429 | 1 |
| Cct5 | 0.08489516 | 0.310195929 | 0.143 | 0.057 | 1 |
| Tmem39b | 0.085070178 | 0.357863145 | 0.176 | 0.086 | 1 |
| Prr14l | 0.085113319 | 0.293628138 | 0.341 | 0.229 | 1 |
| Zc3h15 | 0.085346522 | -0.281842256 | 0.264 | 0.4 | 1 |
| Yars | 0.085393059 | 0.422630747 | 0.374 | 0.271 | 1 |
| Gm26786 | 0.085439282 | -0.280794145 | 0.055 | 0.129 | 1 |
| Celf1 | 0.085577102 | -0.30098448 | 0.637 | 0.771 | 1 |
| Gm43376 | 0.086125056 | -0.284946217 | 0.121 | 0.229 | 1 |
| Ccny | 0.086381997 | -0.280732795 | 0.319 | 0.457 | 1 |
| Smarcad1 | 0.086703959 | -0.320957156 | 0.56 | 0.7 | 1 |
| Trim33 | 0.087068151 | -0.337206268 | 0.538 | 0.629 | 1 |
| 4930578M01Rik | 0.087233158 | 0.330366711 | 0.143 | 0.057 | 1 |
| Eea1 | 0.087252759 | 0.35360234 | 0.385 | 0.271 | 1 |
| Ccdc61 | 0.087454496 | 0.475207511 | 0.187 | 0.1 | 1 |
| Far1 | 0.087723548 | 0.27182501 | 0.462 | 0.329 | 1 |
| Adpgk | 0.088006721 | 0.284397599 | 0.121 | 0.043 | 1 |
| Manea | 0.088174323 | -0.40062749 | 0.088 | 0.171 | 1 |
| Mpped2 | 0.088216988 | -0.674166248 | 0.615 | 0.657 | 1 |
| Plxna2 | 0.088366476 | -0.417251503 | 0.571 | 0.629 | 1 |
| Mrps7 | 0.088441736 | -0.270876402 | 0.044 | 0.114 | 1 |
| Scfd2 | 0.088590074 | -0.392272259 | 0.297 | 0.414 | 1 |
| Cbl | 0.088763484 | 0.464109891 | 0.385 | 0.271 | 1 |
| Adgrb1 | 0.089138605 | 0.388815907 | 0.22 | 0.129 | 1 |
| Sntb2 | 0.089313576 | 0.273029794 | 0.121 | 0.043 | 1 |
| AC161165.4 | 0.089313576 | -0.317390967 | 0.055 | 0.129 | 1 |
| Dph5 | 0.089486352 | 0.369259987 | 0.154 | 0.071 | 1 |
| Gucd1 | 0.089500431 | -0.462551864 | 0.066 | 0.143 | 1 |
| Efcab11 | 0.089534056 | 0.375196855 | 0.615 | 0.5 | 1 |
| Csnk1g1 | 0.089684402 | -0.296981298 | 0.374 | 0.514 | 1 |
| Arl2bp | 0.089850515 | -0.251870864 | 0.044 | 0.114 | 1 |
| Cdc42 | 0.089884778 | -0.397044047 | 0.363 | 0.457 | 1 |
| Birc2 | 0.090127775 | 0.369402481 | 0.242 | 0.129 | 1 |
| Mpzl1 | 0.090295217 | 0.302380194 | 0.396 | 0.257 | 1 |
| Mtap | 0.090636016 | -0.310219631 | 0.055 | 0.129 | 1 |
| Pbdc1 | 0.090640822 | 0.508000003 | 0.154 | 0.071 | 1 |
| Cavin4 | 0.091277302 | -0.301625805 | 0.044 | 0.114 | 1 |
| Cecr2 | 0.09137138 | 0.554913137 | 0.473 | 0.371 | 1 |
| 2900097C17Rik | 0.091383818 | -0.451514229 | 0.319 | 0.429 | 1 |
| Csnk1d | 0.091609475 | -0.348316417 | 0.11 | 0.2 | 1 |
| Traf3ip2 | 0.091946778 | 0.294478774 | 0.33 | 0.214 | 1 |
| Tcf20 | 0.091984405 | 0.260791891 | 0.835 | 0.743 | 1 |
| Csmd2 | 0.092282697 | 0.278630055 | 0.451 | 0.3 | 1 |
| Ube2q2 | 0.09234642 | 0.367803615 | 0.33 | 0.229 | 1 |
| Ndufs4 | 0.09252799 | 0.380120815 | 0.473 | 0.343 | 1 |
| Dis3l2 | 0.092570004 | 0.277359309 | 0.56 | 0.429 | 1 |
| Dpy30 | 0.093265411 | 0.25103286 | 0.187 | 0.086 | 1 |
| Gclc | 0.093482518 | -0.461072908 | 0.187 | 0.286 | 1 |
| Cd99l2 | 0.0934999 | 0.278254625 | 0.198 | 0.1 | 1 |
| Elf1 | 0.094075658 | 0.38182188 | 0.209 | 0.114 | 1 |
| Ythdf3 | 0.094189379 | -0.310666373 | 0.429 | 0.586 | 1 |
| Mettl25 | 0.094390373 | -0.390562247 | 0.187 | 0.286 | 1 |
| Phlpp2 | 0.094467819 | 0.343401197 | 0.33 | 0.214 | 1 |
| Hectd2 | 0.094700125 | 0.371336661 | 0.242 | 0.143 | 1 |
| Adgrg1 | 0.09482975 | 0.394320698 | 0.187 | 0.1 | 1 |
| Sash1 | 0.094866135 | 0.353309789 | 0.33 | 0.2 | 1 |
| Gm48228 | 0.095667207 | -0.280425353 | 0.044 | 0.114 | 1 |
| Tspyl2 | 0.096084038 | 0.25701189 | 0.121 | 0.043 | 1 |
| Dync1li2 | 0.096296383 | 0.383716594 | 0.385 | 0.257 | 1 |
| Ywhaz | 0.096547768 | -0.409428987 | 0.44 | 0.557 | 1 |
| Tmem170b | 0.096648744 | 0.417513802 | 0.242 | 0.143 | 1 |
| Homer1 | 0.096749762 | -0.46998504 | 0.363 | 0.443 | 1 |
| Vgf | 0.097026119 | -0.366566868 | 0.11 | 0.2 | 1 |
| Tbc1d9 | 0.097081416 | 0.328238933 | 0.176 | 0.086 | 1 |
| Gm20708 | 0.097191189 | -0.321296152 | 0.066 | 0.143 | 1 |
| Nlk | 0.097267584 | -0.265590603 | 0.813 | 0.843 | 1 |
| Rbm4b | 0.09760947 | -0.467387993 | 0.33 | 0.414 | 1 |
| Dhdds | 0.097672081 | 0.369841793 | 0.418 | 0.314 | 1 |
| Nudt4 | 0.09771388 | -0.372070536 | 0.198 | 0.3 | 1 |
| Rell1 | 0.097807657 | 0.333172082 | 0.198 | 0.1 | 1 |
| Nup188 | 0.09809268 | 0.358605425 | 0.275 | 0.171 | 1 |
| Hif1a | 0.098120159 | 0.350241724 | 0.264 | 0.157 | 1 |
| Ppargc1a | 0.098237445 | -0.343167963 | 0.099 | 0.186 | 1 |
| Zbtb37 | 0.098266085 | 0.316837454 | 0.209 | 0.114 | 1 |
| Cul5 | 0.098465981 | 0.39202678 | 0.44 | 0.314 | 1 |
| Slc6a17 | 0.098904691 | -0.316894971 | 0.055 | 0.129 | 1 |
| Kcnn2 | 0.098995235 | -0.394916494 | 0.604 | 0.714 | 1 |
| 4930453N24Rik | 0.099042754 | -0.342673416 | 0.132 | 0.229 | 1 |
| Ccdc59 | 0.099061206 | 0.300089737 | 0.154 | 0.071 | 1 |
| Leng8 | 0.099134894 | 0.418631155 | 0.22 | 0.129 | 1 |
| Kif2c | 0.099262977 | -0.332349609 | 0.11 | 0.2 | 1 |
| Enox1 | 0.099352458 | -0.578932869 | 0.637 | 0.671 | 1 |
| Dlg4 | 0.09971897 | -0.34537914 | 0.165 | 0.257 | 1 |
| Satb2 | 0.09986915 | -0.394806883 | 0.066 | 0.143 | 1 |
| Elp5 | 0.099991391 | -0.272277192 | 0.099 | 0.186 | 1 |
| Rab10 | 0.100155746 | -0.46831736 | 0.571 | 0.629 | 1 |
| Polr3a | 0.100313517 | 0.304819718 | 0.154 | 0.071 | 1 |
| Aco2 | 0.100355973 | -0.430059347 | 0.297 | 0.386 | 1 |
| Ivns1abp | 0.100442969 | -0.36306468 | 0.308 | 0.4 | 1 |
| Angptl2 | 0.100582475 | -0.275709668 | 0.099 | 0.186 | 1 |
| Gm12353 | 0.100669971 | 0.389815443 | 0.297 | 0.2 | 1 |
| Chst11 | 0.101034056 | 0.632124548 | 0.308 | 0.229 | 1 |
| Dmxl2 | 0.101034541 | 0.310208474 | 0.264 | 0.157 | 1 |
| Adss | 0.1011414 | 0.269227383 | 0.198 | 0.1 | 1 |
| Srgap1 | 0.1011414 | 0.308897152 | 0.198 | 0.1 | 1 |
| Necab1 | 0.101149826 | -0.30966757 | 0.077 | 0.157 | 1 |
| Phf2 | 0.10116245 | -0.394193828 | 0.143 | 0.243 | 1 |
| Ccdc90b | 0.101174962 | -0.291794316 | 0.099 | 0.186 | 1 |
| Tdrkh | 0.101444469 | 0.432911674 | 0.286 | 0.186 | 1 |
| Mbd6 | 0.101578417 | 0.327843205 | 0.154 | 0.071 | 1 |
| Zkscan3 | 0.101598427 | -0.348023739 | 0.418 | 0.529 | 1 |
| Atpif1 | 0.1021147 | -0.267373519 | 0.297 | 0.414 | 1 |
| Prr11 | 0.102302302 | 0.512562591 | 0.22 | 0.129 | 1 |
| Pex19 | 0.102605631 | 0.25937611 | 0.132 | 0.057 | 1 |
| Zfp617 | 0.102605631 | 0.317483183 | 0.132 | 0.057 | 1 |
| Pcsk5 | 0.102605631 | 0.491687075 | 0.132 | 0.057 | 1 |
| Spdya | 0.102840815 | 0.29444453 | 0.11 | 0.043 | 1 |
| Jak1 | 0.103015484 | 0.391653107 | 0.264 | 0.157 | 1 |
| Pink1 | 0.103111833 | -0.301051423 | 0.077 | 0.157 | 1 |
| Bcl7c | 0.103111833 | -0.269121569 | 0.077 | 0.157 | 1 |
| Dnajc11 | 0.103215222 | 0.347262554 | 0.297 | 0.186 | 1 |
| Pmepa1 | 0.103221978 | -0.353807888 | 0.242 | 0.371 | 1 |
| Csnk1e | 0.103270114 | 0.291218402 | 0.231 | 0.129 | 1 |
| Spire1 | 0.103631453 | 0.261581157 | 0.571 | 0.486 | 1 |
| Zfp606 | 0.103932898 | -0.323554436 | 0.121 | 0.214 | 1 |
| Mknk1 | 0.103996066 | 0.307245006 | 0.132 | 0.057 | 1 |
| Shmt1 | 0.103996066 | 0.331155327 | 0.132 | 0.057 | 1 |
| Gnai1 | 0.104183434 | -0.435648531 | 0.099 | 0.186 | 1 |
| Kcnt2 | 0.104315719 | 0.319724635 | 0.297 | 0.171 | 1 |
| Arsg | 0.104372222 | 0.272849322 | 0.11 | 0.043 | 1 |
| Mcur1 | 0.104372222 | 0.298734636 | 0.11 | 0.043 | 1 |
| Tacc2 | 0.104633431 | 0.346065331 | 0.165 | 0.086 | 1 |
| Tmem106b | 0.10470965 | -0.303451194 | 0.165 | 0.271 | 1 |
| Lmln | 0.105069958 | -0.404234981 | 0.121 | 0.214 | 1 |
| Dpf2 | 0.105069958 | -0.282731121 | 0.121 | 0.214 | 1 |
| Trim9 | 0.105925594 | 0.516495064 | 0.352 | 0.229 | 1 |
| Fam208b | 0.106027708 | 0.428022619 | 0.462 | 0.343 | 1 |
| Uba3 | 0.10604467 | -0.391396871 | 0.176 | 0.271 | 1 |
| A830018L16Rik | 0.106221186 | -0.335690425 | 0.11 | 0.2 | 1 |
| Degs1 | 0.106640444 | -0.330048959 | 0.099 | 0.186 | 1 |
| Ankrd13b | 0.106640444 | -0.30832402 | 0.099 | 0.186 | 1 |
| Szrd1 | 0.106650185 | 0.330714456 | 0.22 | 0.129 | 1 |
| Atg2b | 0.106821821 | 0.30677484 | 0.132 | 0.057 | 1 |
| Cs | 0.107043795 | -0.352929872 | 0.22 | 0.329 | 1 |
| Nkd1 | 0.107423265 | 0.256571765 | 0.165 | 0.071 | 1 |
| Crkl | 0.107590087 | -0.314400994 | 0.143 | 0.243 | 1 |
| Jpx | 0.107764717 | -0.267192931 | 0.055 | 0.129 | 1 |
| Abhd15 | 0.107789233 | -0.312262256 | 0.132 | 0.229 | 1 |
| Gatsl2 | 0.108057262 | 0.398870331 | 0.297 | 0.186 | 1 |
| Pkn2 | 0.108174125 | 0.360514698 | 0.637 | 0.5 | 1 |
| Mzt1 | 0.108245092 | 0.332968765 | 0.286 | 0.186 | 1 |
| Rab23 | 0.108257339 | 0.324314447 | 0.132 | 0.057 | 1 |
| Fam155a | 0.108283972 | 0.589452156 | 0.582 | 0.486 | 1 |
| Mapkap1 | 0.108355824 | 0.272500204 | 0.44 | 0.314 | 1 |
| Coil | 0.108424861 | 0.344568419 | 0.165 | 0.086 | 1 |
| Hsd17b4 | 0.108489675 | -0.305276425 | 0.077 | 0.157 | 1 |
| Mal | 0.108624691 | -0.3319974 | 0.11 | 0.2 | 1 |
| Susd6 | 0.108727687 | -0.252100314 | 0.297 | 0.429 | 1 |
| Scn3b | 0.108729018 | -0.298655316 | 0.088 | 0.171 | 1 |
| Cep162 | 0.109245401 | 0.34326678 | 0.286 | 0.186 | 1 |
| Synpr | 0.109394601 | -0.32271288 | 0.209 | 0.329 | 1 |
| Rbms1 | 0.109441152 | -0.45124485 | 0.143 | 0.229 | 1 |
| Tmem132a | 0.109563838 | -0.288587933 | 0.154 | 0.257 | 1 |
| Ptrh2 | 0.109708081 | 0.307411929 | 0.132 | 0.057 | 1 |
| Vps13c | 0.109803101 | -0.331024964 | 0.143 | 0.243 | 1 |
| Olfm3 | 0.110047295 | -0.512428395 | 0.088 | 0.171 | 1 |
| Cops3 | 0.110413928 | 0.305467137 | 0.275 | 0.171 | 1 |
| Tubb4a | 0.110573579 | -0.367344275 | 0.143 | 0.229 | 1 |
| Kctd3 | 0.110574238 | -0.369767565 | 0.154 | 0.243 | 1 |
| Wasf2 | 0.110670162 | 0.349686978 | 0.352 | 0.243 | 1 |
| Cyp39a1 | 0.110904078 | 0.372000953 | 0.198 | 0.114 | 1 |
| Trip4 | 0.110947232 | -0.425512052 | 0.33 | 0.457 | 1 |
| Mthfd1l | 0.111189468 | 0.360435256 | 0.363 | 0.243 | 1 |
| Vamp4 | 0.111778161 | 0.256482253 | 0.297 | 0.171 | 1 |
| Mgat5 | 0.111868104 | -0.317592985 | 0.505 | 0.657 | 1 |
| Cog5 | 0.111868104 | 0.389691661 | 0.604 | 0.529 | 1 |
| Dcaf8 | 0.112129149 | 0.274795281 | 0.44 | 0.329 | 1 |
| Kdm7a | 0.112244645 | 0.472879762 | 0.231 | 0.143 | 1 |
| Tomm70a | 0.112451539 | -0.302985038 | 0.242 | 0.371 | 1 |
| 9530068E07Rik | 0.112655633 | 0.262102969 | 0.132 | 0.057 | 1 |
| Abhd18 | 0.112887407 | 0.385139427 | 0.308 | 0.214 | 1 |
| Basp1 | 0.112953509 | -0.280260538 | 0.462 | 0.571 | 1 |
| Sh3gl1 | 0.112984052 | -0.393383199 | 0.099 | 0.186 | 1 |
| Ilf2 | 0.112994321 | 0.27845019 | 0.527 | 0.414 | 1 |
| Shoc2 | 0.113029724 | -0.294624936 | 0.253 | 0.371 | 1 |
| Abhd17b | 0.113143568 | 0.267833371 | 0.44 | 0.314 | 1 |
| Pygb | 0.113146727 | -0.300435706 | 0.165 | 0.271 | 1 |
| Hp1bp3 | 0.113295452 | 0.29648276 | 0.429 | 0.3 | 1 |
| Scarb2 | 0.113445144 | 0.322315084 | 0.22 | 0.129 | 1 |
| Tmem245 | 0.11350636 | 0.317789691 | 0.352 | 0.243 | 1 |
| Mcm5 | 0.113944431 | 0.275949417 | 0.11 | 0.043 | 1 |
| Bloc1s2 | 0.113944431 | 0.366896453 | 0.11 | 0.043 | 1 |
| Wee1 | 0.114016957 | 0.282191304 | 0.363 | 0.243 | 1 |
| Zfp407 | 0.114291269 | -0.381499553 | 0.538 | 0.614 | 1 |
| Wdr20 | 0.11446438 | 0.42013951 | 0.352 | 0.243 | 1 |
| Nup155 | 0.11448427 | -0.353566048 | 0.242 | 0.343 | 1 |
| Cox7b | 0.114821823 | 0.372180867 | 0.187 | 0.1 | 1 |
| Lpp | 0.115452164 | -0.614687377 | 0.275 | 0.357 | 1 |
| Snrnp40 | 0.115493115 | -0.272235852 | 0.143 | 0.243 | 1 |
| Pgap2 | 0.115582464 | 0.253782529 | 0.286 | 0.171 | 1 |
| Cln3 | 0.115604976 | 0.297695437 | 0.11 | 0.043 | 1 |
| Skp2 | 0.115682651 | 0.305055358 | 0.33 | 0.214 | 1 |
| Gstz1 | 0.115784427 | 0.345527929 | 0.22 | 0.129 | 1 |
| Hikeshi | 0.116093319 | -0.274995846 | 0.11 | 0.2 | 1 |
| Nfyc | 0.116142034 | 0.315644527 | 0.516 | 0.414 | 1 |
| Man1a2 | 0.116434548 | -0.368023829 | 0.429 | 0.5 | 1 |
| Dst | 0.116480203 | 0.30838509 | 0.593 | 0.529 | 1 |
| Fgfr1op2 | 0.116658462 | -0.302452273 | 0.143 | 0.243 | 1 |
| Thumpd3 | 0.117193593 | 0.350460996 | 0.132 | 0.057 | 1 |
| Epm2a | 0.117193593 | 0.293764251 | 0.132 | 0.057 | 1 |
| H3f3b | 0.117239066 | 0.296642213 | 0.538 | 0.4 | 1 |
| Lyrm9 | 0.117284488 | 0.272627763 | 0.11 | 0.043 | 1 |
| Atf1 | 0.117287872 | 0.310862203 | 0.275 | 0.171 | 1 |
| Atxn2 | 0.117674948 | -0.294185349 | 0.473 | 0.586 | 1 |
| AY036118 | 0.117919775 | 0.3701848 | 0.484 | 0.4 | 1 |
| Wnk2 | 0.118197359 | -0.318380101 | 0.275 | 0.386 | 1 |
| Dbt | 0.118432423 | 0.354238994 | 0.143 | 0.071 | 1 |
| Zbtb17 | 0.118432423 | -0.268892269 | 0.077 | 0.157 | 1 |
| Psd2 | 0.118671567 | 0.254344954 | 0.187 | 0.1 | 1 |
| Nup98 | 0.119175909 | 0.333940289 | 0.527 | 0.429 | 1 |
| Gm26699 | 0.11946969 | -0.431401086 | 0.187 | 0.286 | 1 |
| Cfap77 | 0.119569785 | -0.355080451 | 0.132 | 0.229 | 1 |
| Spidr | 0.119595528 | -0.507882127 | 0.385 | 0.457 | 1 |
| Ccdc141 | 0.120297786 | 0.325742334 | 0.132 | 0.057 | 1 |
| Fhod3 | 0.120453913 | 0.520164233 | 0.165 | 0.086 | 1 |
| Bcas3 | 0.12048815 | -0.334990863 | 0.516 | 0.6 | 1 |
| Nol10 | 0.120675314 | -0.256509343 | 0.165 | 0.257 | 1 |
| Plekha8 | 0.120700923 | 0.261222418 | 0.11 | 0.043 | 1 |
| Mertk | 0.12076724 | -0.301235347 | 0.121 | 0.214 | 1 |
| Ppp4r3b | 0.120869747 | 0.379622443 | 0.429 | 0.329 | 1 |
| Wdr45b | 0.121293787 | -0.259848597 | 0.11 | 0.2 | 1 |
| Syne2 | 0.121404382 | -0.333519325 | 0.659 | 0.7 | 1 |
| Epha7 | 0.121412441 | -0.289832292 | 0.143 | 0.243 | 1 |
| Rnf220 | 0.12149192 | 0.769624811 | 0.231 | 0.143 | 1 |
| Pten | 0.121679428 | -0.344790068 | 0.44 | 0.571 | 1 |
| Stil | 0.121875784 | 0.333063597 | 0.462 | 0.357 | 1 |
| Suz12 | 0.121876024 | -0.308364914 | 0.56 | 0.686 | 1 |
| Tsc22d2 | 0.122079925 | -0.315992851 | 0.538 | 0.657 | 1 |
| Cisd1 | 0.122438102 | 0.260471412 | 0.11 | 0.043 | 1 |
| 3110021N24Rik | 0.122487343 | -0.285891309 | 0.088 | 0.171 | 1 |
| Galnt13 | 0.122903044 | 0.335286814 | 0.516 | 0.4 | 1 |
| Cdc37 | 0.123465983 | 0.304624587 | 0.132 | 0.057 | 1 |
| Sntg1 | 0.123693014 | 0.298952104 | 0.44 | 0.314 | 1 |
| Pclaf | 0.123809261 | -0.303736955 | 0.374 | 0.529 | 1 |
| Gdap1 | 0.123845583 | -0.261228652 | 0.143 | 0.243 | 1 |
| Ccdc171 | 0.124271557 | 0.386093838 | 0.22 | 0.129 | 1 |
| Lmbrd2 | 0.124436018 | -0.355858359 | 0.165 | 0.271 | 1 |
| Cand1 | 0.124863631 | 0.256333424 | 0.308 | 0.2 | 1 |
| Usp14 | 0.125117781 | 0.363705534 | 0.363 | 0.271 | 1 |
| Mfsd8 | 0.125311831 | -0.266834089 | 0.11 | 0.2 | 1 |
| Cacng4 | 0.12560922 | 0.312842101 | 0.242 | 0.143 | 1 |
| Lmo4 | 0.125631893 | -0.262063118 | 0.187 | 0.286 | 1 |
| Arl5b | 0.125720447 | -0.383831135 | 0.154 | 0.243 | 1 |
| Sppl3 | 0.125878607 | -0.301013912 | 0.418 | 0.543 | 1 |
| Rars2 | 0.125952665 | 0.364650764 | 0.308 | 0.2 | 1 |
| Sptlc1 | 0.126038818 | 0.354332961 | 0.176 | 0.1 | 1 |
| Gramd1b | 0.126204703 | 0.30274248 | 0.275 | 0.171 | 1 |
| Fbxo38 | 0.12657033 | 0.365485781 | 0.242 | 0.157 | 1 |
| Per2 | 0.126673992 | 0.30550099 | 0.187 | 0.1 | 1 |
| Edem3 | 0.127272104 | -0.280731764 | 0.121 | 0.214 | 1 |
| Fbxl5 | 0.127647669 | 0.355907298 | 0.385 | 0.271 | 1 |
| Ip6k2 | 0.127709265 | 0.393741359 | 0.275 | 0.186 | 1 |
| Sh3gl2 | 0.127766994 | 0.347882648 | 0.11 | 0.043 | 1 |
| Gnal | 0.128155235 | -0.323579555 | 0.286 | 0.4 | 1 |
| Agpat3 | 0.128489203 | -0.284609349 | 0.264 | 0.371 | 1 |
| Raph1 | 0.128512523 | -0.28199293 | 0.341 | 0.443 | 1 |
| Trafd1 | 0.128604538 | 0.315629543 | 0.198 | 0.114 | 1 |
| Dock4 | 0.128730515 | -0.420548098 | 0.637 | 0.7 | 1 |
| Ywhae | 0.128767609 | -0.26061208 | 0.648 | 0.771 | 1 |
| Vti1b | 0.128825868 | 0.272568208 | 0.231 | 0.129 | 1 |
| Msra | 0.128920803 | -0.331675528 | 0.363 | 0.486 | 1 |
| Efnb3 | 0.129037157 | 0.295643805 | 0.165 | 0.086 | 1 |
| Aplp2 | 0.129089567 | 0.274314858 | 0.571 | 0.443 | 1 |
| Jkamp | 0.130326409 | 0.292006828 | 0.33 | 0.214 | 1 |
| Utp6 | 0.130482684 | -0.361247888 | 0.121 | 0.2 | 1 |
| Socs6 | 0.130625383 | 0.34075369 | 0.22 | 0.129 | 1 |
| Ralyl | 0.1311213 | 0.469351518 | 0.451 | 0.343 | 1 |
| Rnf141 | 0.131303941 | 0.372735908 | 0.198 | 0.114 | 1 |
| Ank | 0.131434501 | 0.270996149 | 0.418 | 0.3 | 1 |
| Chordc1 | 0.131672849 | 0.353809517 | 0.209 | 0.129 | 1 |
| Tcf3 | 0.132819042 | 0.261864257 | 0.352 | 0.243 | 1 |
| Ppp1r12a | 0.13346012 | 0.333669816 | 0.692 | 0.671 | 1 |
| Gm26561 | 0.133797477 | -0.403830607 | 0.264 | 0.371 | 1 |
| Taf6l | 0.133859011 | 0.303771777 | 0.143 | 0.071 | 1 |
| Arpp21 | 0.133889894 | -0.298266504 | 0.451 | 0.543 | 1 |
| Rab22a | 0.133936155 | 0.451024097 | 0.242 | 0.157 | 1 |
| Gm2000 | 0.134045695 | -0.266147968 | 0.121 | 0.214 | 1 |
| Kif13a | 0.13419582 | 0.347623076 | 0.308 | 0.214 | 1 |
| Ddx46 | 0.13419582 | 0.286256155 | 0.308 | 0.214 | 1 |
| Iars | 0.134203176 | 0.392667755 | 0.319 | 0.229 | 1 |
| Cd9 | 0.13433058 | 0.393266983 | 0.286 | 0.186 | 1 |
| Hdac9 | 0.134835114 | -0.281876084 | 0.703 | 0.757 | 1 |
| Ap1s2 | 0.135011453 | -0.47455384 | 0.143 | 0.214 | 1 |
| Vstm2a | 0.13501832 | -0.382132832 | 0.099 | 0.171 | 1 |
| Wdr34 | 0.135039685 | -0.394138736 | 0.066 | 0.129 | 1 |
| Dusp12 | 0.135166975 | 0.278246806 | 0.231 | 0.143 | 1 |
| Tk1 | 0.135195399 | 0.30457389 | 0.242 | 0.157 | 1 |
| Cdc5l | 0.135221 | -0.299875138 | 0.143 | 0.229 | 1 |
| Prkag1 | 0.135434105 | 0.298765352 | 0.198 | 0.114 | 1 |
| Eif5b | 0.135640274 | 0.358169473 | 0.275 | 0.171 | 1 |
| Rab7 | 0.136089694 | 0.281396912 | 0.308 | 0.2 | 1 |
| Abat | 0.136132088 | -0.38219934 | 0.242 | 0.357 | 1 |
| Taf3 | 0.136254468 | -0.286878781 | 0.341 | 0.457 | 1 |
| Dpp6 | 0.136601429 | 0.599352654 | 0.648 | 0.5 | 1 |
| Tox3 | 0.136694059 | -0.327809822 | 0.857 | 0.9 | 1 |
| Dlst | 0.137133892 | 0.474761676 | 0.275 | 0.186 | 1 |
| Ctbp1 | 0.137523106 | 0.284299541 | 0.176 | 0.1 | 1 |
| Tmem110 | 0.137523106 | -0.418237239 | 0.11 | 0.186 | 1 |
| Ccdc14 | 0.137523106 | 0.327418648 | 0.176 | 0.1 | 1 |
| Atp11a | 0.137989855 | -0.250503428 | 0.11 | 0.2 | 1 |
| Lrp12 | 0.138425668 | 0.258183514 | 0.308 | 0.2 | 1 |
| Pms2 | 0.138769708 | 0.251701577 | 0.209 | 0.114 | 1 |
| Atp5g3 | 0.139258671 | -0.430425621 | 0.143 | 0.229 | 1 |
| Ctnnal1 | 0.139452216 | 0.310682732 | 0.33 | 0.229 | 1 |
| Aamdc | 0.139643107 | 0.288601911 | 0.165 | 0.086 | 1 |
| Ube2d1 | 0.139895354 | -0.28807724 | 0.231 | 0.343 | 1 |
| Dhx36 | 0.140080085 | 0.268894336 | 0.418 | 0.314 | 1 |
| Ppp1r10 | 0.140200715 | 0.312501266 | 0.264 | 0.171 | 1 |
| Ociad1 | 0.140792415 | 0.291093109 | 0.308 | 0.2 | 1 |
| Smyd3 | 0.140857872 | -0.366770249 | 0.473 | 0.6 | 1 |
| Usp37 | 0.14092273 | -0.304772873 | 0.659 | 0.686 | 1 |
| Actr1b | 0.141211502 | -0.343767518 | 0.099 | 0.171 | 1 |
| Ppp2r2c | 0.141211502 | -0.376792889 | 0.099 | 0.171 | 1 |
| Sos1 | 0.141420251 | -0.301572271 | 0.308 | 0.429 | 1 |
| Kmt5b | 0.141513131 | -0.422845095 | 0.264 | 0.371 | 1 |
| L3mbtl3 | 0.141674779 | -0.416496873 | 0.264 | 0.357 | 1 |
| Plekhg1 | 0.14169374 | 0.339091318 | 0.253 | 0.157 | 1 |
| Coq2 | 0.14195713 | 0.459954937 | 0.22 | 0.143 | 1 |
| Krit1 | 0.142162956 | -0.263466102 | 0.418 | 0.543 | 1 |
| Lgmn | 0.143169667 | 0.250716236 | 0.121 | 0.057 | 1 |
| Scd2 | 0.143449066 | 0.330441568 | 0.505 | 0.414 | 1 |
| Grin1 | 0.143789609 | -0.329520757 | 0.154 | 0.243 | 1 |
| Tpgs2 | 0.144086052 | -0.428124592 | 0.088 | 0.157 | 1 |
| Mest | 0.144095701 | -0.37845624 | 0.066 | 0.129 | 1 |
| Mtmr12 | 0.144100181 | 0.25248425 | 0.242 | 0.143 | 1 |
| Dtnb | 0.144207516 | -0.28893557 | 0.308 | 0.414 | 1 |
| Anks1 | 0.144215761 | 0.333034055 | 0.396 | 0.271 | 1 |
| Kdm2a | 0.144222189 | -0.345431662 | 0.549 | 0.629 | 1 |
| Rfwd3 | 0.144464894 | 0.2609903 | 0.516 | 0.4 | 1 |
| Snap91 | 0.144469363 | -0.29841673 | 0.154 | 0.243 | 1 |
| Kdm3b | 0.144660095 | 0.420207419 | 0.418 | 0.329 | 1 |
| Maoa | 0.144837753 | -0.360209172 | 0.044 | 0.1 | 1 |
| Wdr70 | 0.145400252 | 0.28633348 | 0.473 | 0.386 | 1 |
| Nexn | 0.145551699 | 0.310633119 | 0.143 | 0.071 | 1 |
| Pak1 | 0.145814076 | -0.324127592 | 0.264 | 0.386 | 1 |
| Atrnl1 | 0.14617317 | -0.353154553 | 0.44 | 0.557 | 1 |
| Mical3 | 0.146445265 | 0.352778232 | 0.374 | 0.3 | 1 |
| Enpp2 | 0.146653537 | 0.345222519 | 0.176 | 0.1 | 1 |
| Klhdc10 | 0.146841552 | 0.256693535 | 0.648 | 0.557 | 1 |
| Vezf1 | 0.147487572 | 0.413143611 | 0.253 | 0.171 | 1 |
| Ldb1 | 0.148219353 | 0.299579588 | 0.176 | 0.1 | 1 |
| Grin3a | 0.148356385 | 0.255739717 | 0.374 | 0.257 | 1 |
| Actr1a | 0.148411725 | -0.263512157 | 0.209 | 0.3 | 1 |
| Smurf2 | 0.148720143 | -0.407040601 | 0.495 | 0.586 | 1 |
| Lancl2 | 0.148794885 | 0.297709114 | 0.121 | 0.057 | 1 |
| Vps26b | 0.148794885 | 0.310665861 | 0.121 | 0.057 | 1 |
| Cpeb1 | 0.149032129 | 0.252703878 | 0.143 | 0.071 | 1 |
| Tprgl | 0.149184932 | -0.281558081 | 0.044 | 0.1 | 1 |
| Rab6a | 0.149205205 | -0.287881738 | 0.297 | 0.429 | 1 |
| Wdr59 | 0.149257266 | 0.270303916 | 0.165 | 0.086 | 1 |
| Rangap1 | 0.149269113 | -0.319795106 | 0.297 | 0.4 | 1 |
| Smarce1 | 0.149437436 | -0.304178292 | 0.253 | 0.343 | 1 |
| Crk | 0.149492317 | -0.318543991 | 0.187 | 0.286 | 1 |
| Tbc1d22b | 0.149758627 | 0.279438435 | 0.22 | 0.129 | 1 |
| Foxo6 | 0.149797907 | -0.281579415 | 0.11 | 0.186 | 1 |
| Numb | 0.150362334 | 0.332790845 | 0.429 | 0.329 | 1 |
| Esf1 | 0.150743654 | -0.309687842 | 0.275 | 0.357 | 1 |
| Kcnk2 | 0.150952772 | -0.406100664 | 0.209 | 0.3 | 1 |
| Tln2 | 0.151046328 | -0.263859692 | 0.132 | 0.214 | 1 |
| Plec | 0.151395531 | -0.279654199 | 0.044 | 0.1 | 1 |
| Eif2s3x | 0.152117665 | -0.255891455 | 0.154 | 0.243 | 1 |
| Smg6 | 0.152222148 | -0.340047093 | 0.747 | 0.814 | 1 |
| Amd1 | 0.15257573 | 0.263219661 | 0.143 | 0.071 | 1 |
| Gm12394 | 0.152807047 | -0.386943773 | 0.275 | 0.371 | 1 |
| Kcmf1 | 0.153022373 | -0.325025942 | 0.275 | 0.386 | 1 |
| Recql | 0.153039644 | -0.30158658 | 0.077 | 0.143 | 1 |
| Ctdp1 | 0.153039644 | -0.312170504 | 0.077 | 0.143 | 1 |
| Vcan | 0.15312202 | -0.360256433 | 0.264 | 0.371 | 1 |
| Lmtk2 | 0.153173604 | -0.320179291 | 0.286 | 0.386 | 1 |
| Kpna4 | 0.153220431 | -0.36787778 | 0.407 | 0.486 | 1 |
| Tex9 | 0.153355352 | 0.298907841 | 0.297 | 0.2 | 1 |
| Ccdc34 | 0.153619265 | 0.261668788 | 0.407 | 0.3 | 1 |
| Gm13974 | 0.153630995 | -0.280308415 | 0.044 | 0.1 | 1 |
| Chmp2a | 0.153630995 | -0.260932177 | 0.044 | 0.1 | 1 |
| Emc7 | 0.153723284 | -0.443589348 | 0.176 | 0.257 | 1 |
| Hsph1 | 0.154051775 | -0.326245979 | 0.132 | 0.214 | 1 |
| Dhx35 | 0.154371404 | 0.33633897 | 0.143 | 0.071 | 1 |
| Gfm1 | 0.154587304 | 0.253492778 | 0.121 | 0.057 | 1 |
| Gm46430 | 0.154885902 | -0.282878367 | 0.077 | 0.143 | 1 |
| Dna2 | 0.155106445 | 0.274673863 | 0.253 | 0.157 | 1 |
| Heatr3 | 0.155158735 | -0.431212492 | 0.165 | 0.243 | 1 |
| Ranbp2 | 0.155809899 | -0.292487978 | 0.363 | 0.486 | 1 |
| Wbp11 | 0.15615055 | -0.346872933 | 0.088 | 0.157 | 1 |
| Ermp1 | 0.156555703 | 0.323218724 | 0.121 | 0.057 | 1 |
| Paip1 | 0.157843791 | -0.326234569 | 0.231 | 0.314 | 1 |
| Alg6 | 0.157883627 | 0.298887052 | 0.176 | 0.1 | 1 |
| Ap1s1 | 0.157934849 | -0.425107904 | 0.088 | 0.157 | 1 |
| Uqcrq | 0.157934849 | -0.294245268 | 0.088 | 0.157 | 1 |
| Ddx39b | 0.158008598 | 0.267089693 | 0.341 | 0.229 | 1 |
| Eya4 | 0.158009062 | -0.412229638 | 0.253 | 0.343 | 1 |
| Pam | 0.158650197 | 0.291252145 | 0.714 | 0.6 | 1 |
| Tmsb4x | 0.15872646 | -0.356765772 | 0.615 | 0.657 | 1 |
| Trps1 | 0.159103506 | 0.270108252 | 0.769 | 0.714 | 1 |
| Clvs1 | 0.159175819 | 0.337086332 | 0.198 | 0.114 | 1 |
| Asap1 | 0.159350381 | -0.328572179 | 0.703 | 0.786 | 1 |
| Elmo1 | 0.159439642 | -0.316225049 | 0.275 | 0.371 | 1 |
| Fam210a | 0.15954386 | -0.283918876 | 0.066 | 0.129 | 1 |
| Rnft2 | 0.160526185 | -0.369357252 | 0.077 | 0.143 | 1 |
| Gga2 | 0.160535384 | 0.399458148 | 0.22 | 0.143 | 1 |
| Vps50 | 0.16060214 | 0.342195556 | 0.407 | 0.3 | 1 |
| Asf1a | 0.160851999 | -0.402818556 | 0.143 | 0.229 | 1 |
| Copg1 | 0.161549714 | -0.326826129 | 0.088 | 0.157 | 1 |
| Gm16541 | 0.161559802 | -0.300650945 | 0.066 | 0.129 | 1 |
| Kif20b | 0.161904583 | 0.280490379 | 0.363 | 0.257 | 1 |
| Sorcs1 | 0.162211098 | -0.270297879 | 0.286 | 0.4 | 1 |
| Dcakd | 0.162344359 | 0.298458792 | 0.242 | 0.157 | 1 |
| Lancl1 | 0.162390541 | 0.404722116 | 0.231 | 0.157 | 1 |
| Gm10501 | 0.162574958 | 0.253549847 | 0.121 | 0.057 | 1 |
| Tet2 | 0.162736696 | -0.307211817 | 0.319 | 0.429 | 1 |
| Cluh | 0.16282433 | -0.285626535 | 0.044 | 0.1 | 1 |
| Ddx47 | 0.162826173 | 0.289504893 | 0.154 | 0.086 | 1 |
| Ccdc94 | 0.163594919 | -0.269203161 | 0.066 | 0.129 | 1 |
| Miat | 0.163848687 | 0.254906897 | 0.714 | 0.6 | 1 |
| Zfp639 | 0.163958481 | 0.271948672 | 0.198 | 0.114 | 1 |
| Akap7 | 0.163997112 | 0.331504935 | 0.253 | 0.171 | 1 |
| Gm44686 | 0.164533341 | -0.404510436 | 0.308 | 0.4 | 1 |
| Rp2 | 0.16458687 | -0.260864439 | 0.11 | 0.186 | 1 |
| Rps6ka2 | 0.164684533 | 0.258969351 | 0.22 | 0.129 | 1 |
| Osgepl1 | 0.164700027 | -0.258264249 | 0.055 | 0.114 | 1 |
| Fabp5 | 0.164700027 | -0.322451071 | 0.055 | 0.114 | 1 |
| Gmeb2 | 0.165030288 | 0.252734255 | 0.286 | 0.186 | 1 |
| Dock11 | 0.165039769 | -0.316404407 | 0.484 | 0.6 | 1 |
| Rusc2 | 0.165186225 | -0.2502789 | 0.044 | 0.1 | 1 |
| Dnajb9 | 0.165186225 | -0.310235121 | 0.044 | 0.1 | 1 |
| Kcnb1 | 0.165209387 | -0.374033655 | 0.121 | 0.2 | 1 |
| Ankle1 | 0.16534387 | 0.451944976 | 0.132 | 0.071 | 1 |
| Cmc1 | 0.165576531 | 0.250243451 | 0.198 | 0.114 | 1 |
| Tab2 | 0.165648226 | -0.299855982 | 0.253 | 0.343 | 1 |
| Ndufaf7 | 0.166295699 | 0.271429593 | 0.176 | 0.1 | 1 |
| Zfp512 | 0.166297154 | 0.376231564 | 0.33 | 0.243 | 1 |
| Pde3b | 0.166319771 | -0.350271461 | 0.429 | 0.5 | 1 |
| 2010300C02Rik | 0.166320332 | -0.393356441 | 0.077 | 0.143 | 1 |
| Dennd4c | 0.166432323 | 0.370821654 | 0.418 | 0.343 | 1 |
| Ttc9b | 0.166904545 | -0.250127674 | 0.055 | 0.114 | 1 |
| Gm48747 | 0.167723028 | -0.613708904 | 0.066 | 0.129 | 1 |
| Fen1 | 0.167723028 | -0.272731875 | 0.066 | 0.129 | 1 |
| Lnpep | 0.168078362 | -0.382993824 | 0.407 | 0.5 | 1 |
| Mtg2 | 0.168183555 | -0.287824004 | 0.099 | 0.171 | 1 |
| Inpp5b | 0.168183555 | -0.29924818 | 0.099 | 0.171 | 1 |
| Mapk6 | 0.168284089 | -0.323541705 | 0.209 | 0.3 | 1 |
| Appbp2 | 0.168656893 | 0.308967399 | 0.418 | 0.329 | 1 |
| Sept1 | 0.168918476 | 0.347778424 | 0.297 | 0.214 | 1 |
| Unk | 0.170083702 | -0.272394701 | 0.308 | 0.4 | 1 |
| AU040320 | 0.170230923 | 0.346883481 | 0.33 | 0.243 | 1 |
| Fam204a | 0.170289998 | 0.265198692 | 0.297 | 0.214 | 1 |
| Fkbp1a | 0.170758602 | -0.36476106 | 0.275 | 0.371 | 1 |
| Gabbr2 | 0.170870094 | 0.267219301 | 0.121 | 0.057 | 1 |
| Arcn1 | 0.171901004 | 0.28391457 | 0.187 | 0.114 | 1 |
| Zfp462 | 0.171977373 | -0.294881672 | 0.67 | 0.714 | 1 |
| Kcnd3 | 0.172077555 | 0.362097529 | 0.209 | 0.129 | 1 |
| Ift122 | 0.17227035 | -0.269428022 | 0.077 | 0.143 | 1 |
| Flywch1 | 0.174006669 | 0.294478925 | 0.363 | 0.257 | 1 |
| Gpat4 | 0.174486187 | -0.420220784 | 0.165 | 0.243 | 1 |
| Ccdc18 | 0.174622111 | -0.353234387 | 0.231 | 0.329 | 1 |
| 2700081O15Rik | 0.174704724 | 0.37814948 | 0.198 | 0.129 | 1 |
| Gm20275 | 0.174756422 | -0.378165877 | 0.275 | 0.386 | 1 |
| Tatdn1 | 0.174867921 | 0.356339139 | 0.176 | 0.114 | 1 |
| Ghr | 0.175040429 | -0.279081994 | 0.11 | 0.186 | 1 |
| Olfm1 | 0.175321935 | -0.256335594 | 0.121 | 0.2 | 1 |
| Rbbp7 | 0.17563352 | -0.438496781 | 0.209 | 0.286 | 1 |
| Gnb4 | 0.175746375 | 0.332184214 | 0.154 | 0.086 | 1 |
| Edem1 | 0.175944692 | -0.285594539 | 0.055 | 0.114 | 1 |
| Tjp1 | 0.176570091 | 0.376050873 | 0.495 | 0.4 | 1 |
| Mcph1 | 0.176662111 | -0.28974796 | 0.451 | 0.514 | 1 |
| 2310040G07Rik | 0.177359652 | -0.305434435 | 0.099 | 0.171 | 1 |
| Kcnip3 | 0.177424692 | 0.342572063 | 0.418 | 0.343 | 1 |
| Tmem2 | 0.177461594 | 0.28526892 | 0.473 | 0.386 | 1 |
| Echs1 | 0.177652865 | 0.262947637 | 0.154 | 0.086 | 1 |
| Notch1 | 0.177991166 | -0.363119375 | 0.264 | 0.343 | 1 |
| Lclat1 | 0.178214534 | 0.357842062 | 0.286 | 0.2 | 1 |
| Sgcd | 0.178492274 | -0.309366103 | 0.264 | 0.371 | 1 |
| Hdgf | 0.178774843 | -0.265431775 | 0.198 | 0.286 | 1 |
| Tox4 | 0.178793404 | 0.357994871 | 0.187 | 0.114 | 1 |
| Spen | 0.178969266 | 0.278348282 | 0.495 | 0.4 | 1 |
| Slc25a5 | 0.179227523 | -0.280869819 | 0.209 | 0.314 | 1 |
| Plagl2 | 0.179238798 | -0.273720504 | 0.099 | 0.171 | 1 |
| Fndc3a | 0.179284827 | -0.260400368 | 0.396 | 0.486 | 1 |
| Rlf | 0.17936709 | 0.296752774 | 0.374 | 0.271 | 1 |
| Xrcc4 | 0.179673738 | -0.297136228 | 0.473 | 0.557 | 1 |
| Morc3 | 0.180129434 | -0.306326908 | 0.22 | 0.314 | 1 |
| Fam110b | 0.180345867 | -0.259995943 | 0.473 | 0.529 | 1 |
| Cep83 | 0.180854394 | 0.29992276 | 0.538 | 0.471 | 1 |
| Ndel1 | 0.18164619 | -0.36001883 | 0.176 | 0.257 | 1 |
| Plppr4 | 0.182181208 | -0.282068361 | 0.374 | 0.486 | 1 |
| Cab39l | 0.182315746 | 0.283229797 | 0.187 | 0.114 | 1 |
| Pik3ip1 | 0.182960833 | -0.26394467 | 0.055 | 0.114 | 1 |
| Tmem59 | 0.183311556 | 0.324288548 | 0.385 | 0.314 | 1 |
| Dbn1 | 0.183946043 | -0.260378685 | 0.297 | 0.386 | 1 |
| Klf7 | 0.184017338 | -0.340649554 | 0.527 | 0.6 | 1 |
| Tmem87b | 0.184096097 | 0.304664749 | 0.187 | 0.114 | 1 |
| Gm28198 | 0.184096097 | -0.340635629 | 0.121 | 0.2 | 1 |
| Melk | 0.184136559 | 0.319849889 | 0.319 | 0.243 | 1 |
| Sarnp | 0.18453732 | 0.318152126 | 0.549 | 0.429 | 1 |
| Sox2 | 0.184791428 | 0.437842136 | 0.242 | 0.171 | 1 |
| Grm7 | 0.184833023 | 0.368102948 | 0.505 | 0.414 | 1 |
| Vbp1 | 0.184883967 | -0.260446729 | 0.143 | 0.229 | 1 |
| Ptbp2 | 0.184985342 | -0.279433095 | 0.725 | 0.743 | 1 |
| Gpr155 | 0.185432941 | 0.252359734 | 0.154 | 0.086 | 1 |
| Tgs1 | 0.185570299 | -0.292013169 | 0.22 | 0.286 | 1 |
| Ndufaf6 | 0.185705962 | 0.273145963 | 0.132 | 0.071 | 1 |
| Slc25a26 | 0.185705962 | 0.476117518 | 0.132 | 0.071 | 1 |
| Ccser1 | 0.185792671 | -0.29244361 | 0.67 | 0.729 | 1 |
| Gtf2e1 | 0.186102823 | 0.403470586 | 0.165 | 0.1 | 1 |
| Hnrnpa1 | 0.186424601 | -0.288496544 | 0.165 | 0.243 | 1 |
| Adamts10 | 0.186876792 | 0.266823437 | 0.242 | 0.157 | 1 |
| Gnl2 | 0.187137873 | -0.344484222 | 0.143 | 0.214 | 1 |
| Mapre1 | 0.187411621 | 0.328929872 | 0.297 | 0.214 | 1 |
| Mef2c | 0.187613614 | -0.376310647 | 0.385 | 0.486 | 1 |
| Chmp3 | 0.187716867 | -0.334810682 | 0.132 | 0.2 | 1 |
| Supt5 | 0.188869541 | 0.268532115 | 0.209 | 0.129 | 1 |
| Apba1 | 0.189311137 | -0.436687519 | 0.385 | 0.457 | 1 |
| Btbd11 | 0.189934349 | 0.411805969 | 0.165 | 0.1 | 1 |
| Fyco1 | 0.190169467 | 0.408807381 | 0.198 | 0.129 | 1 |
| Mob1b | 0.190536145 | 0.280407351 | 0.231 | 0.157 | 1 |
| Rsbn1l | 0.191292241 | -0.357627599 | 0.462 | 0.529 | 1 |
| Slc38a1 | 0.191677431 | -0.322019823 | 0.549 | 0.6 | 1 |
| Igsf3 | 0.191835207 | -0.25496426 | 0.066 | 0.129 | 1 |
| Cadm2 | 0.19196813 | -0.342339613 | 0.912 | 0.914 | 1 |
| Txlna | 0.192162092 | 0.349919943 | 0.132 | 0.071 | 1 |
| Garnl3 | 0.192199057 | -0.369242764 | 0.165 | 0.243 | 1 |
| Vps37a | 0.192622528 | 0.303511791 | 0.22 | 0.143 | 1 |
| Mlf2 | 0.192929111 | 0.260751604 | 0.253 | 0.171 | 1 |
| Nckap1 | 0.193095149 | 0.356981189 | 0.593 | 0.557 | 1 |
| Trrap | 0.193248579 | 0.260569136 | 0.308 | 0.229 | 1 |
| Gm26624 | 0.193462173 | 0.275276474 | 0.154 | 0.086 | 1 |
| Ksr2.1 | 0.193462173 | 0.312236634 | 0.154 | 0.086 | 1 |
| Senp7 | 0.19356893 | -0.300900853 | 0.44 | 0.5 | 1 |
| Ccnt1 | 0.193847867 | 0.329429943 | 0.33 | 0.243 | 1 |
| Igdcc4 | 0.194037837 | 0.290746132 | 0.275 | 0.186 | 1 |
| Rrm2 | 0.194549668 | 0.347282751 | 0.253 | 0.171 | 1 |
| Ptms | 0.195053769 | -0.442221845 | 0.297 | 0.371 | 1 |
| Alkbh1 | 0.195121998 | 0.381959551 | 0.264 | 0.186 | 1 |
| Pole2 | 0.195508801 | 0.252357115 | 0.154 | 0.086 | 1 |
| Sipa1l3 | 0.196116485 | -0.302779263 | 0.176 | 0.257 | 1 |
| Eya1 | 0.196556923 | 0.346282619 | 0.132 | 0.071 | 1 |
| Ackr3 | 0.19692027 | 0.291911825 | 0.187 | 0.114 | 1 |
| Fam219a | 0.197141952 | -0.322657874 | 0.231 | 0.314 | 1 |
| Shc3 | 0.197357517 | 0.474602456 | 0.198 | 0.129 | 1 |
| Enah | 0.197405061 | -0.263201996 | 0.769 | 0.757 | 1 |
| Abcb7 | 0.197699204 | -0.270456326 | 0.297 | 0.386 | 1 |
| Atg10 | 0.197775724 | 0.311885345 | 0.242 | 0.171 | 1 |
| Zmym6 | 0.197802716 | 0.338842897 | 0.286 | 0.2 | 1 |
| Ube2k | 0.197929432 | -0.285189574 | 0.516 | 0.614 | 1 |
| Ptprm | 0.198667318 | -0.332357893 | 0.231 | 0.314 | 1 |
| Rbm33 | 0.198803012 | 0.255888926 | 0.451 | 0.343 | 1 |
| Atp6v1g2 | 0.198804428 | 0.258792888 | 0.187 | 0.114 | 1 |
| Rybp | 0.199115394 | -0.2797845 | 0.297 | 0.386 | 1 |
| Arid5b | 0.200167457 | 0.55226887 | 0.319 | 0.243 | 1 |
| Pcdh9 | 0.200336986 | -0.404351724 | 0.967 | 0.914 | 1 |
| Hlf | 0.20067386 | -0.259418302 | 0.165 | 0.243 | 1 |
| Zfp704 | 0.201712765 | -0.357585765 | 0.582 | 0.643 | 1 |
| Lekr1 | 0.20232008 | 0.419745438 | 0.209 | 0.143 | 1 |
| Trmt11 | 0.202386453 | -0.481626092 | 0.132 | 0.2 | 1 |
| Rnf168 | 0.202401058 | 0.305780385 | 0.231 | 0.157 | 1 |
| Mettl16 | 0.202411858 | -0.325061343 | 0.275 | 0.357 | 1 |
| Dlgap1 | 0.202522255 | -0.35062056 | 0.549 | 0.629 | 1 |
| Usp48 | 0.203148646 | -0.307207068 | 0.275 | 0.357 | 1 |
| Brd8 | 0.203510707 | 0.30901867 | 0.637 | 0.557 | 1 |
| Agfg2 | 0.204135676 | 0.255945095 | 0.286 | 0.2 | 1 |
| Gclm | 0.204742441 | 0.288692692 | 0.198 | 0.129 | 1 |
| Airn | 0.204899564 | 0.259612552 | 0.22 | 0.143 | 1 |
| Ttc4 | 0.205566577 | 0.270037369 | 0.132 | 0.071 | 1 |
| Camk2a | 0.205841969 | -0.423060968 | 0.11 | 0.171 | 1 |
| Synj1 | 0.206084796 | -0.319627117 | 0.275 | 0.371 | 1 |
| St6gal1 | 0.206182106 | -0.313475655 | 0.33 | 0.4 | 1 |
| Dguok | 0.206611595 | 0.284850813 | 0.11 | 0.057 | 1 |
| Inpp4a | 0.206920704 | 0.294406274 | 0.264 | 0.2 | 1 |
| Usp13 | 0.207865164 | 0.287189343 | 0.132 | 0.071 | 1 |
| B230209E15Rik | 0.207865164 | 0.296774335 | 0.132 | 0.071 | 1 |
| B430010I23Rik | 0.207869622 | 0.390729593 | 0.11 | 0.057 | 1 |
| Marf1 | 0.208820282 | -0.346895543 | 0.319 | 0.4 | 1 |
| Psme4 | 0.20887345 | 0.403736408 | 0.692 | 0.629 | 1 |
| Slc44a1 | 0.209018923 | 0.351108888 | 0.286 | 0.214 | 1 |
| Crym | 0.209128246 | -0.335200718 | 0.088 | 0.143 | 1 |
| Btbd10 | 0.209329832 | -0.312629363 | 0.253 | 0.329 | 1 |
| Rarb | 0.210638061 | -0.328777037 | 0.22 | 0.3 | 1 |
| Sox5 | 0.211890909 | 0.255283778 | 0.714 | 0.614 | 1 |
| Acat1 | 0.212148272 | -0.257683926 | 0.264 | 0.357 | 1 |
| Zfp800 | 0.212172577 | 0.411355326 | 0.297 | 0.214 | 1 |
| St3gal4 | 0.212220628 | -0.396206528 | 0.571 | 0.614 | 1 |
| Rad54l | 0.212496415 | 0.375793796 | 0.308 | 0.229 | 1 |
| Cep164 | 0.212526641 | 0.327265348 | 0.176 | 0.114 | 1 |
| Klhl8 | 0.214149434 | 0.265717017 | 0.165 | 0.1 | 1 |
| Iqcb1 | 0.214355689 | -0.317156235 | 0.275 | 0.371 | 1 |
| Serf2 | 0.215892933 | -0.285795256 | 0.132 | 0.2 | 1 |
| Fnbp4 | 0.216360971 | 0.254163963 | 0.484 | 0.4 | 1 |
| Uso1 | 0.216592431 | -0.253764627 | 0.121 | 0.186 | 1 |
| Mob4 | 0.216672449 | -0.326994266 | 0.198 | 0.271 | 1 |
| Anp32b | 0.217648623 | 0.298318731 | 0.297 | 0.229 | 1 |
| Eln | 0.217761733 | 0.301652411 | 0.143 | 0.086 | 1 |
| Top3b | 0.217761733 | 0.298930898 | 0.143 | 0.086 | 1 |
| Nnat | 0.217877058 | 0.449947075 | 0.571 | 0.543 | 1 |
| Cdc42bpa | 0.21796158 | 0.361525719 | 0.659 | 0.657 | 1 |
| Sec24c | 0.218122864 | 0.261603935 | 0.11 | 0.057 | 1 |
| Kdm3a | 0.219132107 | -0.434579075 | 0.275 | 0.343 | 1 |
| Lin7c | 0.220042443 | 0.379150964 | 0.143 | 0.086 | 1 |
| Armc1 | 0.220536834 | -0.265763639 | 0.11 | 0.171 | 1 |
| Mnat1 | 0.220621511 | -0.311628142 | 0.363 | 0.443 | 1 |
| Gm2163 | 0.221277153 | -0.383673132 | 0.484 | 0.571 | 1 |
| Gars | 0.221488352 | 0.309443532 | 0.253 | 0.186 | 1 |
| Eny2 | 0.221507413 | -0.290021849 | 0.154 | 0.229 | 1 |
| Scfd1 | 0.222142735 | -0.256438079 | 0.198 | 0.286 | 1 |
| Egfr | 0.222236611 | 0.438384774 | 0.692 | 0.643 | 1 |
| Slc35d1 | 0.222340241 | 0.25181471 | 0.143 | 0.086 | 1 |
| Sypl | 0.222340241 | 0.301943526 | 0.143 | 0.086 | 1 |
| Tcf7l2 | 0.223878792 | -0.471757779 | 0.275 | 0.343 | 1 |
| Malsu1 | 0.223896402 | -0.263330608 | 0.132 | 0.2 | 1 |
| Pacs2 | 0.223896402 | 0.319286987 | 0.187 | 0.129 | 1 |
| Usf3 | 0.224046792 | -0.266887128 | 0.143 | 0.214 | 1 |
| Serinc5 | 0.224655169 | 0.326356082 | 0.143 | 0.086 | 1 |
| Ulk2 | 0.225586547 | -0.419401938 | 0.396 | 0.471 | 1 |
| Slc25a12 | 0.225751455 | 0.315104237 | 0.429 | 0.357 | 1 |
| Sec14l1 | 0.226020061 | -0.262260314 | 0.143 | 0.214 | 1 |
| Rtn4ip1 | 0.226047856 | 0.253796466 | 0.11 | 0.057 | 1 |
| Dnm2 | 0.226902085 | 0.271076496 | 0.418 | 0.329 | 1 |
| Dnajc7 | 0.226902525 | 0.252973275 | 0.418 | 0.329 | 1 |
| Gins1 | 0.227390914 | 0.297664943 | 0.264 | 0.2 | 1 |
| Ttc17 | 0.227603615 | 0.301714133 | 0.352 | 0.271 | 1 |
| Mastl | 0.227822512 | 0.271096054 | 0.363 | 0.286 | 1 |
| Brd7 | 0.228098425 | 0.303076614 | 0.198 | 0.129 | 1 |
| Adgra3 | 0.228963245 | -0.256569586 | 0.198 | 0.271 | 1 |
| Exosc7 | 0.22933658 | 0.296275261 | 0.143 | 0.086 | 1 |
| Fhit | 0.229970279 | 0.532819416 | 0.407 | 0.329 | 1 |
| Tbc1d12 | 0.23011554 | 0.344387 | 0.275 | 0.2 | 1 |
| 9130011E15Rik | 0.230368138 | -0.282771145 | 0.264 | 0.343 | 1 |
| Pkig | 0.23057642 | 0.30412749 | 0.374 | 0.286 | 1 |
| Papd5 | 0.230890392 | -0.292735539 | 0.308 | 0.386 | 1 |
| Efna5 | 0.231090809 | -0.384990128 | 0.593 | 0.657 | 1 |
| Map7 | 0.231262828 | 0.303440653 | 0.176 | 0.114 | 1 |
| Dctn2 | 0.231262828 | 0.279773598 | 0.176 | 0.114 | 1 |
| Zfp692 | 0.231522705 | 0.284595142 | 0.231 | 0.157 | 1 |
| Ube2g1 | 0.231678749 | 0.34977103 | 0.473 | 0.386 | 1 |
| Gbf1 | 0.232422448 | 0.263614866 | 0.549 | 0.443 | 1 |
| Iars2 | 0.233436882 | -0.401079259 | 0.176 | 0.229 | 1 |
| Psmb1 | 0.234104079 | 0.254210296 | 0.253 | 0.186 | 1 |
| Wasf1 | 0.234217527 | -0.32427895 | 0.242 | 0.329 | 1 |
| Akap11 | 0.234385639 | 0.253776744 | 0.418 | 0.343 | 1 |
| Plcl2 | 0.235152586 | -0.423221627 | 0.44 | 0.486 | 1 |
| Sdccag8 | 0.23527967 | -0.280901637 | 0.341 | 0.429 | 1 |
| Prkcz | 0.235752163 | -0.370960902 | 0.077 | 0.129 | 1 |
| Ppm1b | 0.236115088 | -0.306806158 | 0.341 | 0.386 | 1 |
| Sox11 | 0.236617565 | 0.260324404 | 0.648 | 0.557 | 1 |
| Arhgef2 | 0.236724421 | 0.292739185 | 0.341 | 0.271 | 1 |
| Nsg2 | 0.237766586 | -0.309611864 | 0.538 | 0.643 | 1 |
| Ezr | 0.238039955 | -0.265636181 | 0.198 | 0.271 | 1 |
| Kdm5c | 0.238151692 | -0.369216984 | 0.209 | 0.271 | 1 |
| Gabra1 | 0.238370241 | 0.253937914 | 0.198 | 0.129 | 1 |
| Mccc1 | 0.239181311 | 0.337931111 | 0.154 | 0.1 | 1 |
| Spry2 | 0.239825388 | -0.295262743 | 0.099 | 0.157 | 1 |
| Napb | 0.240180697 | 0.263285501 | 0.209 | 0.129 | 1 |
| Mettl9 | 0.240181723 | -0.308112984 | 0.297 | 0.386 | 1 |
| Mthfs | 0.240463188 | 0.305011406 | 0.198 | 0.129 | 1 |
| Clybl | 0.240515606 | 0.314056925 | 0.165 | 0.1 | 1 |
| Panx1 | 0.240515606 | -0.258860923 | 0.11 | 0.171 | 1 |
| Sgol2a | 0.240707263 | 0.27974241 | 0.242 | 0.171 | 1 |
| Prr12 | 0.240725468 | 0.263754291 | 0.209 | 0.143 | 1 |
| Pcyt1b | 0.24134266 | 0.286328759 | 0.143 | 0.086 | 1 |
| Plekha7 | 0.24134266 | 0.304658033 | 0.143 | 0.086 | 1 |
| Dach1 | 0.24139641 | 0.277554392 | 0.626 | 0.543 | 1 |
| Zfp672 | 0.241514502 | -0.385208194 | 0.143 | 0.2 | 1 |
| R3hdm2 | 0.242022275 | -0.344693944 | 0.473 | 0.529 | 1 |
| Rad50 | 0.242218862 | 0.312267516 | 0.22 | 0.157 | 1 |
| Clpx | 0.243421662 | 0.257181944 | 0.253 | 0.186 | 1 |
| Zfp385b | 0.244053781 | 0.265662791 | 0.253 | 0.171 | 1 |
| Slc25a47 | 0.244618456 | -0.382045181 | 0.099 | 0.157 | 1 |
| Asb13 | 0.246294823 | -0.297525367 | 0.077 | 0.129 | 1 |
| Ptges3 | 0.246295385 | 0.292476437 | 0.308 | 0.243 | 1 |
| Prdm10 | 0.24675784 | -0.265687876 | 0.275 | 0.357 | 1 |
| Ccl25 | 0.246902267 | 0.295168263 | 0.209 | 0.143 | 1 |
| Uggt2 | 0.247141436 | 0.344726516 | 0.385 | 0.3 | 1 |
| Cadps | 0.247650311 | -0.265949826 | 0.604 | 0.686 | 1 |
| Atp5b | 0.248143384 | -0.315949768 | 0.231 | 0.3 | 1 |
| Ppp1r2 | 0.248209036 | -0.413199116 | 0.363 | 0.429 | 1 |
| Man2c1os | 0.248755214 | 0.316656211 | 0.143 | 0.086 | 1 |
| Trmt6 | 0.248877352 | 0.25723528 | 0.176 | 0.114 | 1 |
| Xpnpep1 | 0.249792598 | -0.268104035 | 0.11 | 0.171 | 1 |
| Nop10 | 0.250344555 | -0.260906282 | 0.055 | 0.1 | 1 |
| Soga1 | 0.250542834 | -0.289300136 | 0.33 | 0.4 | 1 |
| Myo1e | 0.251047852 | -0.271584787 | 0.066 | 0.114 | 1 |
| Otub1 | 0.251049279 | -0.301959248 | 0.066 | 0.114 | 1 |
| Pak7 | 0.251153592 | -0.390807123 | 0.209 | 0.271 | 1 |
| Eef2 | 0.251315615 | -0.319629045 | 0.165 | 0.229 | 1 |
| Rbm24 | 0.251688279 | 0.320378957 | 0.121 | 0.071 | 1 |
| Inpp5f | 0.251884745 | -0.454118259 | 0.286 | 0.343 | 1 |
| Slc20a1 | 0.253189242 | 0.279082209 | 0.209 | 0.143 | 1 |
| Rnf208 | 0.253941937 | -0.256607645 | 0.066 | 0.114 | 1 |
| Zbtb2 | 0.253941937 | -0.292422062 | 0.066 | 0.114 | 1 |
| Lrrc29 | 0.254415677 | -0.266491112 | 0.077 | 0.129 | 1 |
| Kcnk10 | 0.255026192 | 0.305643943 | 0.56 | 0.471 | 1 |
| Zcchc24 | 0.255792456 | 0.281395493 | 0.187 | 0.129 | 1 |
| Mlh3 | 0.256857712 | -0.263425939 | 0.066 | 0.114 | 1 |
| 4732471J01Rik | 0.257047327 | 0.322715613 | 0.429 | 0.343 | 1 |
| Ogdh | 0.257160419 | 0.270389573 | 0.396 | 0.3 | 1 |
| Cd47 | 0.257464394 | 0.288175892 | 0.462 | 0.386 | 1 |
| Aqr | 0.257919867 | -0.27757574 | 0.176 | 0.243 | 1 |
| Tle1 | 0.258422543 | -0.402082809 | 0.56 | 0.571 | 1 |
| Rnf216 | 0.259057087 | 0.279816266 | 0.451 | 0.4 | 1 |
| Tspan14 | 0.259586866 | 0.285388827 | 0.209 | 0.143 | 1 |
| Ank2 | 0.259723619 | 0.258459143 | 0.967 | 0.971 | 1 |
| Ptchd4 | 0.259796647 | -0.399820566 | 0.066 | 0.114 | 1 |
| Ocrl | 0.260159368 | -0.356051257 | 0.22 | 0.286 | 1 |
| Etv1 | 0.26151942 | -0.358389067 | 0.385 | 0.443 | 1 |
| Senp1 | 0.262310243 | -0.284841596 | 0.264 | 0.329 | 1 |
| Ndrg2 | 0.262533052 | 0.322679681 | 0.187 | 0.129 | 1 |
| Magee1 | 0.262720978 | -0.261393562 | 0.077 | 0.129 | 1 |
| Rpa2 | 0.262720978 | 0.296453054 | 0.121 | 0.071 | 1 |
| BC030867 | 0.262720978 | 0.256400491 | 0.121 | 0.071 | 1 |
| Ndufa7 | 0.262720978 | 0.349423861 | 0.121 | 0.071 | 1 |
| Rpap2 | 0.262758782 | -0.325817382 | 0.066 | 0.114 | 1 |
| Slc25a13 | 0.263165736 | 0.411372918 | 0.297 | 0.229 | 1 |
| Arhgap6 | 0.263209119 | -0.384617525 | 0.088 | 0.143 | 1 |
| Grm8 | 0.263209119 | -0.282095531 | 0.088 | 0.143 | 1 |
| Strap | 0.263209119 | -0.25597873 | 0.088 | 0.143 | 1 |
| Fam171a1 | 0.263614409 | -0.316517792 | 0.275 | 0.343 | 1 |
| Gjc1 | 0.264806935 | 0.310602979 | 0.187 | 0.129 | 1 |
| Kcnj3 | 0.265042135 | 0.289662558 | 0.176 | 0.114 | 1 |
| Zfp946 | 0.265530557 | -0.260181287 | 0.077 | 0.129 | 1 |
| Eri3 | 0.265635408 | 0.295436478 | 0.462 | 0.4 | 1 |
| Ccdc148 | 0.265734384 | 0.359222784 | 0.154 | 0.1 | 1 |
| Fam210b | 0.266108281 | -0.254895919 | 0.055 | 0.1 | 1 |
| L3mbtl2 | 0.266108281 | -0.264899985 | 0.055 | 0.1 | 1 |
| Trpm3 | 0.266444096 | -0.339209103 | 0.352 | 0.429 | 1 |
| Ppp6r2 | 0.266595502 | -0.303885396 | 0.418 | 0.5 | 1 |
| Dcaf10 | 0.26660987 | -0.353757281 | 0.209 | 0.271 | 1 |
| Xylt1 | 0.266837962 | 0.564059143 | 0.253 | 0.186 | 1 |
| Cdh10 | 0.266964821 | 0.52588614 | 0.352 | 0.3 | 1 |
| 2610507B11Rik | 0.267072005 | -0.323047896 | 0.253 | 0.314 | 1 |
| Phc3 | 0.267771399 | -0.318160239 | 0.264 | 0.329 | 1 |
| Nucks1 | 0.26821804 | -0.286347896 | 0.33 | 0.371 | 1 |
| Adamts18 | 0.26836076 | -0.491941157 | 0.077 | 0.129 | 1 |
| Kif14 | 0.269276405 | 0.267798539 | 0.231 | 0.171 | 1 |
| Prox1 | 0.269609028 | -0.346427831 | 0.264 | 0.329 | 1 |
| Pde4b | 0.270375138 | 0.266388191 | 0.407 | 0.329 | 1 |
| Pomgnt1 | 0.27077231 | 0.281182813 | 0.154 | 0.1 | 1 |
| Pmf1 | 0.271211616 | 0.267431434 | 0.121 | 0.071 | 1 |
| Lurap1l | 0.271211616 | -0.273744455 | 0.077 | 0.129 | 1 |
| Gm48512 | 0.272571277 | -0.352442463 | 0.209 | 0.271 | 1 |
| Prkce | 0.272982872 | 0.316678131 | 0.462 | 0.4 | 1 |
| Dab1 | 0.273417925 | -0.307909472 | 0.319 | 0.4 | 1 |
| Phf6 | 0.274439832 | 0.362152272 | 0.429 | 0.371 | 1 |
| Ddx55 | 0.274567262 | -0.264125132 | 0.143 | 0.2 | 1 |
| Pak3 | 0.274787159 | 0.355781632 | 0.813 | 0.786 | 1 |
| Sept6 | 0.274840037 | -0.307931181 | 0.066 | 0.114 | 1 |
| Ppip5k1 | 0.274863614 | 0.371333112 | 0.198 | 0.143 | 1 |
| Rit1.1 | 0.276343553 | -0.330634251 | 0.429 | 0.486 | 1 |
| Ybx1 | 0.276397286 | 0.280791082 | 0.407 | 0.329 | 1 |
| Cntln | 0.276784877 | 0.337925273 | 0.516 | 0.5 | 1 |
| Gle1 | 0.277436658 | 0.428703609 | 0.297 | 0.229 | 1 |
| Pgap1 | 0.277673582 | 0.31984154 | 0.275 | 0.214 | 1 |
| Rmdn1 | 0.277674183 | 0.279281761 | 0.275 | 0.214 | 1 |
| Atp6v1b2 | 0.277872416 | -0.250825435 | 0.308 | 0.4 | 1 |
| Psmd5 | 0.278451256 | 0.25433738 | 0.154 | 0.1 | 1 |
| Ppp3cc | 0.278735012 | 0.290459528 | 0.187 | 0.129 | 1 |
| Wscd2 | 0.279201547 | -0.278536104 | 0.055 | 0.1 | 1 |
| Npas3 | 0.280573885 | 0.288469511 | 0.791 | 0.743 | 1 |
| Arpc1a | 0.280827249 | 0.285366861 | 0.341 | 0.286 | 1 |
| Aim2 | 0.281038072 | -0.289489933 | 0.451 | 0.543 | 1 |
| 4930402H24Rik | 0.281233913 | -0.300284132 | 0.78 | 0.8 | 1 |
| Sept11 | 0.282188583 | -0.306923476 | 0.352 | 0.414 | 1 |
| Tmcc3 | 0.282708327 | 0.374497536 | 0.264 | 0.2 | 1 |
| Ssh1 | 0.282822073 | 0.253434284 | 0.121 | 0.071 | 1 |
| Cpne8 | 0.282822073 | 0.330512045 | 0.121 | 0.071 | 1 |
| Ythdf2 | 0.283378535 | 0.330612189 | 0.242 | 0.186 | 1 |
| Gm29260 | 0.28346139 | 0.413233903 | 0.451 | 0.371 | 1 |
| Upf3b | 0.28468757 | -0.291685478 | 0.385 | 0.429 | 1 |
| Map3k1 | 0.284766013 | 0.569096154 | 0.264 | 0.2 | 1 |
| Dync1i2 | 0.285097617 | -0.311771287 | 0.516 | 0.586 | 1 |
| Lamp1 | 0.288714409 | -0.257123454 | 0.187 | 0.257 | 1 |
| Coro2b | 0.290610203 | -0.480234476 | 0.429 | 0.429 | 1 |
| Usp46 | 0.291003474 | -0.250130381 | 0.143 | 0.2 | 1 |
| Fbxo42 | 0.292147663 | -0.336768272 | 0.253 | 0.3 | 1 |
| Spon1 | 0.29223837 | 0.356234557 | 0.352 | 0.286 | 1 |
| Cdh8 | 0.29234481 | -0.326580715 | 0.275 | 0.343 | 1 |
| Myo10 | 0.292865566 | -0.308284998 | 0.264 | 0.343 | 1 |
| Ccdc82 | 0.293230874 | 0.258929346 | 0.297 | 0.229 | 1 |
| Zw10 | 0.293367504 | 0.262218855 | 0.165 | 0.114 | 1 |
| Gpc6 | 0.293458879 | 0.283236835 | 0.626 | 0.629 | 1 |
| Vash1 | 0.293663399 | -0.253817564 | 0.066 | 0.114 | 1 |
| Por | 0.293895747 | -0.277505649 | 0.132 | 0.186 | 1 |
| Ripor2 | 0.293895747 | -0.31915407 | 0.132 | 0.186 | 1 |
| mt-Co2 | 0.294007571 | 0.288885462 | 0.703 | 0.643 | 1 |
| Rsrp1 | 0.294725901 | 0.267974569 | 0.429 | 0.4 | 1 |
| St6galnac5 | 0.295818639 | -0.281082452 | 0.143 | 0.2 | 1 |
| March5 | 0.295818639 | -0.267570973 | 0.143 | 0.2 | 1 |
| Pom121 | 0.296466267 | 0.304905934 | 0.132 | 0.086 | 1 |
| Atp11b | 0.296485671 | 0.334005974 | 0.44 | 0.386 | 1 |
| Camk4 | 0.297472748 | 0.292055519 | 0.385 | 0.329 | 1 |
| Gm28175 | 0.298910132 | 0.341589975 | 0.253 | 0.2 | 1 |
| Kpna3 | 0.299633941 | -0.378586916 | 0.56 | 0.614 | 1 |
| Ppp4r2 | 0.299645011 | -0.314023143 | 0.374 | 0.443 | 1 |
| Erbb4 | 0.299705241 | -0.567229958 | 0.703 | 0.757 | 1 |
| Ppp1r21 | 0.30068658 | -0.285759427 | 0.176 | 0.229 | 1 |
| Kantr | 0.300686854 | 0.32034222 | 0.187 | 0.143 | 1 |
| Tyms | 0.301065641 | 0.282442258 | 0.33 | 0.271 | 1 |
| Supt3 | 0.301397528 | -0.419932582 | 0.363 | 0.414 | 1 |
| Ypel2 | 0.301424896 | -0.286557301 | 0.132 | 0.186 | 1 |
| Cdkl3 | 0.301973821 | 0.310165843 | 0.231 | 0.171 | 1 |
| Vgll4 | 0.302700057 | 0.26855046 | 0.363 | 0.314 | 1 |
| Psmd12 | 0.303038828 | 0.284837242 | 0.187 | 0.129 | 1 |
| Sft2d1 | 0.303038828 | 0.264714833 | 0.187 | 0.129 | 1 |
| Igf2r | 0.303962905 | -0.349504555 | 0.132 | 0.186 | 1 |
| Sass6 | 0.304494428 | 0.275858268 | 0.275 | 0.229 | 1 |
| Atrx | 0.304986328 | -0.2571635 | 0.725 | 0.786 | 1 |
| Cttnbp2nl | 0.306293982 | -0.319548984 | 0.154 | 0.214 | 1 |
| Celf4 | 0.306598922 | -0.465270577 | 0.538 | 0.557 | 1 |
| Stim1 | 0.306996147 | 0.267841724 | 0.253 | 0.186 | 1 |
| Neto1 | 0.308068806 | -0.297434905 | 0.209 | 0.271 | 1 |
| E330009J07Rik | 0.309087559 | -0.28793024 | 0.121 | 0.171 | 1 |
| Anp32a | 0.309920713 | 0.365164937 | 0.22 | 0.171 | 1 |
| Anln | 0.31033235 | 0.316191968 | 0.363 | 0.314 | 1 |
| Stard9 | 0.310349619 | -0.329709436 | 0.154 | 0.2 | 1 |
| Chd3 | 0.310833612 | 0.289540335 | 0.462 | 0.414 | 1 |
| Vav2 | 0.311129902 | 0.260115131 | 0.308 | 0.243 | 1 |
| Kmt5a | 0.311760721 | 0.26724639 | 0.165 | 0.114 | 1 |
| Xpr1 | 0.312454311 | 0.273938072 | 0.407 | 0.357 | 1 |
| Cir1 | 0.313427957 | -0.318259262 | 0.11 | 0.157 | 1 |
| Slc8a1 | 0.313660413 | -0.368135338 | 0.495 | 0.571 | 1 |
| Ndufaf2 | 0.313807458 | -0.428363518 | 0.242 | 0.3 | 1 |
| Pik3ca | 0.314193223 | -0.293519082 | 0.374 | 0.443 | 1 |
| Ccdc186 | 0.314256527 | 0.327590135 | 0.176 | 0.129 | 1 |
| Rad23b | 0.315915507 | -0.259862533 | 0.242 | 0.3 | 1 |
| Tle3 | 0.315943114 | 0.345867029 | 0.143 | 0.1 | 1 |
| Trip11 | 0.319615419 | 0.327386126 | 0.407 | 0.343 | 1 |
| Rngtt | 0.320463589 | 0.261805562 | 0.473 | 0.429 | 1 |
| Slc30a9 | 0.32051252 | 0.277853452 | 0.418 | 0.371 | 1 |
| Abhd2 | 0.321331033 | 0.262135798 | 0.352 | 0.3 | 1 |
| Tnr | 0.321893401 | 0.480289007 | 0.154 | 0.1 | 1 |
| Dip2a | 0.322125469 | 0.309551989 | 0.176 | 0.129 | 1 |
| Sec22a | 0.323213467 | -0.284460612 | 0.209 | 0.257 | 1 |
| Nr3c1 | 0.323301604 | 0.280463137 | 0.242 | 0.186 | 1 |
| Ext2 | 0.323858975 | 0.306091724 | 0.209 | 0.157 | 1 |
| Brk1 | 0.324119478 | -0.315416634 | 0.176 | 0.229 | 1 |
| Plcl1 | 0.324622159 | -0.295630013 | 0.659 | 0.757 | 1 |
| Irf2bp2 | 0.324844932 | -0.346564718 | 0.088 | 0.129 | 1 |
| Otud7b | 0.325156499 | 0.268586411 | 0.297 | 0.243 | 1 |
| Nt5c2 | 0.325352748 | -0.263402719 | 0.352 | 0.414 | 1 |
| Ube2v2 | 0.326014944 | 0.25070847 | 0.275 | 0.214 | 1 |
| Cenpi | 0.326327432 | 0.257408805 | 0.209 | 0.157 | 1 |
| Pms1 | 0.328808084 | 0.325260561 | 0.209 | 0.157 | 1 |
| Tjp2 | 0.328945095 | -0.399136022 | 0.176 | 0.229 | 1 |
| Sh3glb1 | 0.330362122 | -0.254988087 | 0.231 | 0.286 | 1 |
| Ankrd26 | 0.330798446 | -0.317518022 | 0.187 | 0.243 | 1 |
| Ap2b1 | 0.331720497 | -0.313835443 | 0.374 | 0.414 | 1 |
| Prickle2 | 0.33235325 | -0.256824472 | 0.231 | 0.3 | 1 |
| Nipsnap2 | 0.332361806 | 0.351961107 | 0.253 | 0.2 | 1 |
| Tbl1xr1 | 0.332575845 | 0.259086864 | 0.538 | 0.486 | 1 |
| Bcl2l11 | 0.335523617 | 0.281586399 | 0.176 | 0.129 | 1 |
| Gm15283 | 0.336331009 | -0.38624461 | 0.11 | 0.157 | 1 |
| Kif1bp | 0.338215074 | -0.278037431 | 0.154 | 0.2 | 1 |
| Scap | 0.339267774 | -0.390984036 | 0.11 | 0.157 | 1 |
| Ranbp1 | 0.339328079 | -0.382872436 | 0.121 | 0.171 | 1 |
| St18 | 0.33950286 | 0.316765974 | 0.264 | 0.2 | 1 |
| Lonrf3 | 0.340327951 | 0.301493185 | 0.11 | 0.071 | 1 |
| Hmbox1 | 0.340481949 | 0.266403306 | 0.538 | 0.471 | 1 |
| Gnl3 | 0.340825628 | 0.270896073 | 0.198 | 0.143 | 1 |
| Tpd52l2 | 0.340981932 | 0.324719147 | 0.176 | 0.129 | 1 |
| Tnrc6c | 0.341452043 | 0.276569978 | 0.681 | 0.686 | 1 |
| Rdx | 0.341620816 | -0.256423999 | 0.363 | 0.443 | 1 |
| Arpc5l | 0.342220937 | -0.25042244 | 0.11 | 0.157 | 1 |
| Ttc5 | 0.34377138 | -0.280778696 | 0.198 | 0.257 | 1 |
| Naaladl2 | 0.343814284 | 0.451925789 | 0.275 | 0.229 | 1 |
| Inpp4b | 0.345520096 | 0.400286528 | 0.143 | 0.1 | 1 |
| Usp2 | 0.345520096 | 0.278720263 | 0.143 | 0.1 | 1 |
| Eif3j1 | 0.346394758 | 0.311601224 | 0.253 | 0.2 | 1 |
| Arl3 | 0.34724483 | -0.327245752 | 0.275 | 0.343 | 1 |
| Bcan | 0.347458516 | 0.365817796 | 0.154 | 0.114 | 1 |
| Slain1 | 0.348644542 | -0.423703004 | 0.231 | 0.271 | 1 |
| Zmynd11 | 0.34910428 | -0.300197239 | 0.56 | 0.614 | 1 |
| Ryr2 | 0.350610908 | -0.339712794 | 0.088 | 0.129 | 1 |
| Sh3bp4 | 0.350701301 | 0.260127169 | 0.11 | 0.071 | 1 |
| Med14 | 0.351990313 | -0.342596334 | 0.33 | 0.4 | 1 |
| Ago1 | 0.352018594 | 0.363504861 | 0.231 | 0.171 | 1 |
| Acyp2 | 0.352580148 | -0.274275749 | 0.275 | 0.329 | 1 |
| Rnf187 | 0.353767406 | 0.269752213 | 0.22 | 0.171 | 1 |
| Ahctf1 | 0.355250989 | 0.320981076 | 0.407 | 0.357 | 1 |
| Ptpn9 | 0.356945176 | -0.269940151 | 0.286 | 0.343 | 1 |
| Uty | 0.357467227 | -0.271049616 | 0.527 | 0.586 | 1 |
| Sugt1 | 0.35760467 | 0.289321136 | 0.231 | 0.186 | 1 |
| Usp45 | 0.357611151 | 0.304435767 | 0.275 | 0.229 | 1 |
| Ndst3 | 0.359662996 | -0.29347595 | 0.099 | 0.143 | 1 |
| Pdzd4 | 0.362164207 | -0.250904238 | 0.165 | 0.214 | 1 |
| Tmem167 | 0.362383539 | 0.32294094 | 0.473 | 0.414 | 1 |
| Ints4 | 0.362621546 | -0.282384367 | 0.187 | 0.243 | 1 |
| Yme1l1 | 0.362708665 | 0.290596097 | 0.385 | 0.343 | 1 |
| Prdm15 | 0.364086757 | 0.265717578 | 0.143 | 0.1 | 1 |
| Phactr2 | 0.364840736 | 0.282719812 | 0.11 | 0.071 | 1 |
| Id4 | 0.365079498 | -0.411232399 | 0.352 | 0.4 | 1 |
| Aig1 | 0.366019907 | -0.253629126 | 0.143 | 0.2 | 1 |
| E130006D01Rik | 0.366632873 | -0.304857562 | 0.077 | 0.114 | 1 |
| Dennd6a | 0.366744196 | -0.322564452 | 0.33 | 0.371 | 1 |
| Iqsec1 | 0.367240771 | 0.437047789 | 0.143 | 0.1 | 1 |
| Slit1 | 0.367298259 | 0.477554177 | 0.549 | 0.486 | 1 |
| Sec23b | 0.367354921 | -0.278615753 | 0.088 | 0.129 | 1 |
| Impad1 | 0.367653951 | 0.278008346 | 0.198 | 0.157 | 1 |
| Camkmt | 0.369261086 | -0.284764545 | 0.308 | 0.357 | 1 |
| Nav3 | 0.369745175 | -0.540609867 | 0.56 | 0.557 | 1 |
| CAAA01118383.1 | 0.372011048 | 0.255281495 | 0.176 | 0.129 | 1 |
| Chaf1a | 0.373091653 | 0.295718005 | 0.198 | 0.157 | 1 |
| Dlx1 | 0.373504433 | 0.251487364 | 0.473 | 0.443 | 1 |
| Zfp710 | 0.374455217 | 0.283489974 | 0.22 | 0.171 | 1 |
| Rps27rt | 0.375539023 | -0.268713291 | 0.165 | 0.214 | 1 |
| Ift57 | 0.375784529 | -0.263720913 | 0.11 | 0.157 | 1 |
| Ywhab | 0.378097931 | -0.278251963 | 0.319 | 0.371 | 1 |
| Stmn3 | 0.378097931 | -0.306953424 | 0.319 | 0.371 | 1 |
| Bora | 0.378753043 | 0.317698224 | 0.264 | 0.214 | 1 |
| Zfp329 | 0.379043212 | -0.282741152 | 0.253 | 0.3 | 1 |
| Slc22a23 | 0.384927296 | -0.510634651 | 0.231 | 0.257 | 1 |
| Hs2st1 | 0.385639088 | -0.316419172 | 0.637 | 0.671 | 1 |
| Prrc2c | 0.386098017 | 0.26923884 | 0.637 | 0.614 | 1 |
| Zfp326 | 0.387325035 | -0.250169817 | 0.33 | 0.371 | 1 |
| Bmpr1b | 0.389214682 | -0.264227693 | 0.165 | 0.214 | 1 |
| Lig1 | 0.390353493 | 0.266409879 | 0.286 | 0.229 | 1 |
| Dctn4 | 0.392091274 | -0.403352944 | 0.341 | 0.371 | 1 |
| Gm2087 | 0.395642255 | 0.272874473 | 0.176 | 0.129 | 1 |
| Slf2 | 0.397056577 | -0.261141708 | 0.484 | 0.514 | 1 |
| Icam5 | 0.398396353 | -0.251950553 | 0.066 | 0.1 | 1 |
| Rps12-ps3 | 0.398396353 | -0.261717617 | 0.066 | 0.1 | 1 |
| Hectd1 | 0.40444661 | -0.267678467 | 0.407 | 0.457 | 1 |
| Tmeff2 | 0.405685514 | 0.308884476 | 0.374 | 0.343 | 1 |
| Nbeal1 | 0.405884248 | -0.320147923 | 0.363 | 0.429 | 1 |
| Srp14 | 0.406086994 | -0.262728781 | 0.099 | 0.143 | 1 |
| Cuedc1 | 0.406528396 | 0.256155216 | 0.209 | 0.171 | 1 |
| Golm1 | 0.40747424 | -0.321800168 | 0.132 | 0.171 | 1 |
| Ints6l | 0.407835297 | 0.396581089 | 0.286 | 0.243 | 1 |
| Nkain2 | 0.408686775 | -0.279818605 | 0.824 | 0.8 | 1 |
| Plcb1 | 0.409019039 | -0.32005107 | 0.67 | 0.686 | 1 |
| Phf21b | 0.409759195 | -0.269124887 | 0.187 | 0.229 | 1 |
| Ttll4 | 0.412225211 | -0.271446795 | 0.286 | 0.314 | 1 |
| Lrch1 | 0.414583163 | -0.282119074 | 0.231 | 0.271 | 1 |
| Amph | 0.414806737 | -0.306704899 | 0.363 | 0.414 | 1 |
| Rev3l | 0.416545879 | 0.262880489 | 0.582 | 0.586 | 1 |
| Kirrel3 | 0.416915635 | -0.362710824 | 0.429 | 0.343 | 1 |
| Glce | 0.417616629 | 0.258813622 | 0.308 | 0.257 | 1 |
| Adcy5 | 0.418289128 | -0.265009372 | 0.308 | 0.371 | 1 |
| D430041D05Rik | 0.421611301 | 0.386413625 | 0.407 | 0.343 | 1 |
| Atxn2l | 0.422833228 | -0.297175056 | 0.44 | 0.471 | 1 |
| Myo18a | 0.423367406 | -0.26932805 | 0.286 | 0.343 | 1 |
| Pag1 | 0.423494463 | -0.333419269 | 0.275 | 0.314 | 1 |
| Naa35 | 0.423995818 | 0.288969858 | 0.297 | 0.257 | 1 |
| Gm26953 | 0.426425746 | -0.256777326 | 0.132 | 0.171 | 1 |
| Api5 | 0.426506653 | 0.266007695 | 0.22 | 0.171 | 1 |
| Sh3d19 | 0.427463509 | -0.303671344 | 0.209 | 0.257 | 1 |
| Iqgap3 | 0.428608204 | 0.28586772 | 0.231 | 0.2 | 1 |
| Zfp367 | 0.429250028 | 0.340814012 | 0.22 | 0.186 | 1 |
| Npm1 | 0.432152691 | -0.340892921 | 0.275 | 0.314 | 1 |
| Rassf3 | 0.432397685 | 0.280025061 | 0.176 | 0.143 | 1 |
| Stn1 | 0.432397685 | 0.278374916 | 0.176 | 0.143 | 1 |
| Rbfox3 | 0.437978648 | 0.333820947 | 0.22 | 0.171 | 1 |
| Nckap5 | 0.439117483 | 0.332995227 | 0.176 | 0.129 | 1 |
| Cmip | 0.439320596 | 0.332062779 | 0.527 | 0.5 | 1 |
| Zwint | 0.441298046 | -0.284723725 | 0.495 | 0.514 | 1 |
| Frrs1l | 0.445191529 | -0.355400455 | 0.165 | 0.2 | 1 |
| Tubgcp2 | 0.445391016 | -0.257148827 | 0.176 | 0.214 | 1 |
| Cst3 | 0.445541143 | 0.35112616 | 0.604 | 0.557 | 1 |
| Wdr37 | 0.447021831 | 0.334548691 | 0.363 | 0.314 | 1 |
| Ccdc85a | 0.447961674 | -0.274974957 | 0.11 | 0.143 | 1 |
| Gfra1 | 0.448776588 | 0.254303784 | 0.231 | 0.186 | 1 |
| Itgb8 | 0.449548446 | 0.27044249 | 0.363 | 0.329 | 1 |
| Pid1 | 0.449883509 | 0.393977257 | 0.484 | 0.443 | 1 |
| Lhfpl3 | 0.452060233 | 1.016418946 | 0.187 | 0.143 | 1 |
| Hsbp1 | 0.452600629 | -0.526686894 | 0.099 | 0.129 | 1 |
| Puf60 | 0.452620676 | -0.372544373 | 0.121 | 0.157 | 1 |
| Mybl1 | 0.453856635 | -0.309543183 | 0.22 | 0.257 | 1 |
| Cct8 | 0.454079847 | 0.329951854 | 0.132 | 0.1 | 1 |
| Lztfl1 | 0.454558749 | 0.25360855 | 0.176 | 0.143 | 1 |
| Lrpap1 | 0.456065173 | 0.262122984 | 0.154 | 0.114 | 1 |
| Dph6 | 0.456383994 | -0.307266214 | 0.319 | 0.343 | 1 |
| Chtop | 0.457698445 | -0.308769923 | 0.209 | 0.257 | 1 |
| Prom1 | 0.457757663 | 0.279744347 | 0.132 | 0.1 | 1 |
| Mir670hg | 0.457776047 | 0.323357796 | 0.176 | 0.143 | 1 |
| Gm47071 | 0.458715831 | -0.333629627 | 0.11 | 0.143 | 1 |
| Desi1 | 0.459397779 | -0.292516781 | 0.22 | 0.257 | 1 |
| Slx4ip | 0.464365172 | -0.266037233 | 0.209 | 0.243 | 1 |
| Atic | 0.46596493 | -0.292083619 | 0.11 | 0.143 | 1 |
| Brd9 | 0.466347935 | -0.25464647 | 0.176 | 0.214 | 1 |
| Nxph1 | 0.467236648 | 0.405324583 | 0.286 | 0.243 | 1 |
| Prkcb | 0.46764496 | 0.306069387 | 0.527 | 0.471 | 1 |
| Grina | 0.469014866 | -0.286221303 | 0.264 | 0.3 | 1 |
| Ccdc57 | 0.476174849 | 0.273160034 | 0.264 | 0.229 | 1 |
| Tbc1d1 | 0.477776105 | 0.291575116 | 0.187 | 0.157 | 1 |
| Rap1gap | 0.477910549 | -0.329148281 | 0.198 | 0.229 | 1 |
| Rad51ap1 | 0.478757962 | -0.2687973 | 0.209 | 0.243 | 1 |
| 5730522E02Rik | 0.479210952 | -0.399271024 | 0.549 | 0.557 | 1 |
| Tbcd | 0.479395482 | -0.261645665 | 0.253 | 0.286 | 1 |
| Ube2h | 0.479673057 | -0.25702794 | 0.396 | 0.414 | 1 |
| Ube2i | 0.481298742 | -0.267270214 | 0.341 | 0.371 | 1 |
| Tmx3 | 0.481757824 | 0.331792189 | 0.264 | 0.229 | 1 |
| Usp1 | 0.49030522 | -0.260315476 | 0.143 | 0.171 | 1 |
| Dcp1a | 0.49170063 | 0.277168386 | 0.231 | 0.2 | 1 |
| Flrt2 | 0.491773875 | -0.366615935 | 0.429 | 0.443 | 1 |
| Antxr2 | 0.49361884 | -0.259899178 | 0.165 | 0.2 | 1 |
| Eif4g1 | 0.493750269 | 0.256183003 | 0.396 | 0.357 | 1 |
| Zfhx3 | 0.497052477 | -0.350084097 | 0.703 | 0.7 | 1 |
| Lrp1b | 0.499501548 | 0.321998231 | 0.736 | 0.771 | 1 |
| Lonp2 | 0.512449431 | -0.267125776 | 0.319 | 0.343 | 1 |
| Tpr | 0.515779718 | -0.288654416 | 0.341 | 0.357 | 1 |
| Opcml | 0.516927023 | 0.29305159 | 0.407 | 0.357 | 1 |
| Dlx6os1 | 0.518035729 | -0.251460142 | 0.549 | 0.543 | 1 |
| Brinp3 | 0.523087295 | 0.492906965 | 0.209 | 0.186 | 1 |
| Atp5f1 | 0.524096472 | -0.262058096 | 0.242 | 0.271 | 1 |
| Myt1l | 0.524130409 | -0.326742513 | 0.484 | 0.514 | 1 |
| March3 | 0.524959167 | -0.401378718 | 0.143 | 0.171 | 1 |
| Prdm16 | 0.526062044 | 0.254219607 | 0.473 | 0.414 | 1 |
| Gramd1a | 0.526297894 | 0.337519753 | 0.187 | 0.171 | 1 |
| Lrrc4c | 0.526931694 | 0.322676198 | 0.769 | 0.714 | 1 |
| Nbdy | 0.527735276 | -0.267325629 | 0.077 | 0.1 | 1 |
| Syn2 | 0.529958307 | 0.420980723 | 0.33 | 0.3 | 1 |
| Disp1 | 0.530229512 | -0.264338891 | 0.132 | 0.157 | 1 |
| Asah1 | 0.532684484 | -0.320743589 | 0.187 | 0.214 | 1 |
| Arhgef12 | 0.533766685 | -0.289752678 | 0.462 | 0.471 | 1 |
| Dut | 0.535594589 | -0.271792822 | 0.143 | 0.171 | 1 |
| Dgkb | 0.538747404 | -0.256209529 | 0.846 | 0.871 | 1 |
| Ahdc1 | 0.539156445 | -0.306668346 | 0.198 | 0.229 | 1 |
| Robo2 | 0.539211211 | -0.964037612 | 0.582 | 0.543 | 1 |
| Cers6 | 0.541855421 | -0.431702163 | 0.176 | 0.2 | 1 |
| Csmd1 | 0.547349664 | 0.351218851 | 0.681 | 0.6 | 1 |
| Adam12 | 0.548444706 | 0.296433109 | 0.264 | 0.229 | 1 |
| Gm38505 | 0.5524848 | -0.415069742 | 0.527 | 0.5 | 1 |
| Cdk5r1 | 0.556776819 | 0.378024656 | 0.242 | 0.214 | 1 |
| Secisbp2l | 0.557891016 | -0.276260701 | 0.165 | 0.186 | 1 |
| Dnajc8 | 0.56141058 | -0.286697392 | 0.253 | 0.271 | 1 |
| Gm38134 | 0.564854053 | -0.260732164 | 0.077 | 0.1 | 1 |
| 1700025G04Rik | 0.565728832 | 0.277181074 | 0.33 | 0.3 | 1 |
| Reep5 | 0.566703226 | 0.281878316 | 0.22 | 0.186 | 1 |
| Lyst | 0.568302015 | -0.376091474 | 0.352 | 0.357 | 1 |
| Atxn1 | 0.571470656 | -0.332785236 | 0.703 | 0.729 | 1 |
| Mob2 | 0.571943106 | -0.273357665 | 0.187 | 0.214 | 1 |
| Eda | 0.583695082 | -0.341566675 | 0.44 | 0.457 | 1 |
| Hepacam | 0.584252013 | -0.274308255 | 0.198 | 0.229 | 1 |
| Egfros | 0.589125541 | 0.327613989 | 0.308 | 0.3 | 1 |
| Kcnd2 | 0.593292888 | 0.315112302 | 0.835 | 0.757 | 1 |
| Mctp1 | 0.594965317 | -0.30451845 | 0.209 | 0.229 | 1 |
| Ttc21b | 0.597838051 | 0.274501542 | 0.165 | 0.143 | 1 |
| Agbl4 | 0.600900088 | -0.250072059 | 0.374 | 0.414 | 1 |
| Klc1 | 0.602986757 | -0.293451532 | 0.374 | 0.386 | 1 |
| Nphp1 | 0.609154371 | 0.286119375 | 0.165 | 0.143 | 1 |
| D030055H07Rik | 0.61252615 | 0.329239038 | 0.209 | 0.186 | 1 |
| C2cd2 | 0.61503272 | 0.260793359 | 0.132 | 0.114 | 1 |
| Slc4a7 | 0.617235172 | -0.382927801 | 0.451 | 0.471 | 1 |
| Prkar1a | 0.617500843 | -0.319272007 | 0.209 | 0.214 | 1 |
| Abca1 | 0.62219853 | -0.305195453 | 0.319 | 0.329 | 1 |
| Cdc7 | 0.625150055 | 0.260720181 | 0.231 | 0.214 | 1 |
| Wwtr1 | 0.626579476 | -0.276965971 | 0.121 | 0.143 | 1 |
| Gria4 | 0.629256978 | -0.339737551 | 0.451 | 0.457 | 1 |
| Kcnh7 | 0.632677871 | -0.298168361 | 0.736 | 0.757 | 1 |
| Usp42 | 0.634863197 | -0.312246006 | 0.121 | 0.143 | 1 |
| Frmpd4 | 0.641894143 | 0.283843569 | 0.253 | 0.229 | 1 |
| Npat | 0.641942874 | 0.251917248 | 0.396 | 0.386 | 1 |
| Sv2a | 0.646896224 | -0.267912766 | 0.22 | 0.243 | 1 |
| B4galt5 | 0.648900215 | 0.274061647 | 0.132 | 0.114 | 1 |
| Nup205 | 0.649451653 | -0.290808175 | 0.308 | 0.329 | 1 |
| Sgcz | 0.661718088 | 0.337336733 | 0.648 | 0.7 | 1 |
| Bcor | 0.666296474 | 0.321410716 | 0.352 | 0.343 | 1 |
| Cadm1 | 0.668941081 | 0.325536047 | 0.725 | 0.8 | 1 |
| Sema6a | 0.671243092 | 0.256163978 | 0.341 | 0.314 | 1 |
| Peak1 | 0.688559636 | -0.30346055 | 0.363 | 0.371 | 1 |
| Spsb4 | 0.692270685 | 0.267660075 | 0.132 | 0.114 | 1 |
| Nup153 | 0.699740371 | -0.250127196 | 0.319 | 0.343 | 1 |
| Msh3 | 0.705508483 | 0.31013862 | 0.286 | 0.3 | 1 |
| Gm47207 | 0.70747533 | -0.265349083 | 0.154 | 0.171 | 1 |
| Dlgap5 | 0.708895708 | 0.30662415 | 0.22 | 0.214 | 1 |
| Pdha1 | 0.713165454 | -0.350872136 | 0.099 | 0.114 | 1 |
| Naa16 | 0.716567039 | -0.391817245 | 0.352 | 0.329 | 1 |
| Sdk1 | 0.719136903 | 0.327775149 | 0.242 | 0.229 | 1 |
| Ubr3 | 0.720026276 | -0.299722434 | 0.56 | 0.557 | 1 |
| Atg3 | 0.738167549 | -0.334852197 | 0.22 | 0.229 | 1 |
| Ctnna3 | 0.754678622 | 0.301985136 | 0.275 | 0.286 | 1 |
| Vps13a | 0.757368958 | 0.284553295 | 0.374 | 0.386 | 1 |
| Wdr17 | 0.760345554 | -0.353212652 | 0.374 | 0.386 | 1 |
| Zfp536 | 0.761835188 | -0.280879286 | 0.385 | 0.371 | 1 |
| Nexmif | 0.768404835 | -0.2601605 | 0.143 | 0.157 | 1 |
| Rbbp4 | 0.77336734 | 0.28614324 | 0.451 | 0.471 | 1 |
| Unc5c | 0.782205006 | 0.321429439 | 0.253 | 0.243 | 1 |
| Gaa | 0.786549224 | -0.265716803 | 0.121 | 0.129 | 1 |
| Gm11149 | 0.790757139 | -0.432962071 | 0.363 | 0.343 | 1 |
| Kcnb2 | 0.806986786 | 0.255000949 | 0.33 | 0.314 | 1 |
| A230057D06Rik | 0.809657649 | -0.25424974 | 0.264 | 0.271 | 1 |
| Pnpt1 | 0.809859912 | -0.252804497 | 0.22 | 0.243 | 1 |
| Clstn2 | 0.815186369 | -0.313519546 | 0.121 | 0.1 | 1 |
| Mid1 | 0.816693843 | -0.263130243 | 0.505 | 0.486 | 1 |
| Cdh13 | 0.862484309 | 0.269623411 | 0.187 | 0.186 | 1 |
| Unc5d | 0.86978611 | -0.936806232 | 0.198 | 0.2 | 1 |
| Nek1 | 0.888879731 | -0.294518592 | 0.242 | 0.229 | 1 |
| Egfem1 | 0.924428599 | -0.277946444 | 0.297 | 0.3 | 1 |
| Btg3 | 0.934559086 | 0.295722425 | 0.099 | 0.1 | 1 |
| Pou2f2 | 0.949276955 | -0.255914193 | 0.198 | 0.2 | 1 |
| Trak1 | 0.954339163 | 0.288725051 | 0.341 | 0.4 | 1 |
| Tnks2 | 0.954423117 | -0.291770936 | 0.44 | 0.386 | 1 |
| Ints2 | 0.955940775 | -0.253905384 | 0.429 | 0.4 | 1 |

| **Supplemental Table S6. Differentially expressed genes in each NSC & astrocyte sub-type generated comparing the control and the mTBI SVZ, related to Figure 4. (Early aNSC DEGs)** | | | | | |
| --- | --- | --- | --- | --- | --- |
| Column1 | p_val | avg_log2FC | pct.1 | pct.2 | p_val_adj |
| Gm42418 | 2.82485E-18 | 0.559744525 | 1 | 0.995 | 6.41607E-14 |
| Malat1 | 9.41683E-18 | 0.322737194 | 1 | 1 | 2.13884E-13 |
| Wdr17 | 3.34773E-09 | -0.831723738 | 0.725 | 0.864 | 7.60369E-05 |
| Mir670hg | 1.3238E-08 | 0.935280263 | 0.415 | 0.152 | 0.000300675 |
| Gm3764 | 1.6401E-08 | 0.790768546 | 0.79 | 0.602 | 0.000372517 |
| Calm2 | 2.68546E-07 | -0.604046891 | 0.62 | 0.796 | 0.006099474 |
| Plp1 | 2.67306E-06 | 0.51502142 | 0.9 | 0.723 | 0.06071327 |
| A830082K12Rik | 5.44271E-06 | 0.528955421 | 0.13 | 0.01 | 0.123620275 |
| Ubash3b | 7.40535E-06 | 0.69226442 | 0.21 | 0.052 | 0.168197679 |
| Dad1 | 8.64655E-06 | -0.753669567 | 0.045 | 0.183 | 0.196389069 |
| Rora | 1.1103E-05 | -0.309946582 | 0.995 | 0.99 | 0.25218181 |
| Fam171b | 2.28178E-05 | -0.753079765 | 0.38 | 0.555 | 0.51826079 |
| 9530026P05Rik | 2.64117E-05 | 0.631489129 | 0.52 | 0.298 | 0.599888269 |
| Pak1 | 6.98382E-05 | -0.604379535 | 0.32 | 0.503 | 1 |
| Iqcg | 8.54119E-05 | 0.536853481 | 0.235 | 0.084 | 1 |
| Gm14964 | 9.23899E-05 | 0.696783493 | 0.475 | 0.298 | 1 |
| Bbs9 | 0.000100567 | 0.597217553 | 0.395 | 0.209 | 1 |
| Elmod1 | 0.000114449 | -0.586787556 | 0.32 | 0.482 | 1 |
| Kcnip4 | 0.000123604 | 0.256587467 | 0.905 | 0.733 | 1 |
| Ccnl2 | 0.000126949 | 0.520843574 | 0.39 | 0.204 | 1 |
| Cmss1 | 0.000139103 | 0.415902402 | 0.895 | 0.832 | 1 |
| Epha4 | 0.000197212 | -0.670542745 | 0.28 | 0.435 | 1 |
| Mcu | 0.000215721 | -0.609649995 | 0.3 | 0.461 | 1 |
| C530008M17Rik | 0.000228291 | 0.56001924 | 0.25 | 0.105 | 1 |
| Cpq | 0.000301697 | 0.575360739 | 0.345 | 0.178 | 1 |
| Gm45846 | 0.000369252 | 0.540783524 | 0.28 | 0.131 | 1 |
| Sox6 | 0.000398294 | -0.310854891 | 0.825 | 0.89 | 1 |
| Zmynd12 | 0.000400471 | 0.443500009 | 0.12 | 0.026 | 1 |
| Enah | 0.000407961 | -0.465311532 | 0.61 | 0.728 | 1 |
| Dennd4a | 0.000433312 | 0.419920564 | 0.34 | 0.173 | 1 |
| 5730455P16Rik | 0.00044115 | 0.424008452 | 0.12 | 0.026 | 1 |
| Kcnq5 | 0.000469267 | -0.458915066 | 0.595 | 0.681 | 1 |
| Nfix | 0.000505038 | 0.514171393 | 0.42 | 0.246 | 1 |
| Gucy1a1 | 0.000509312 | -0.545160773 | 0.065 | 0.178 | 1 |
| Cltc | 0.000530114 | -0.46564998 | 0.255 | 0.408 | 1 |
| Kcna1 | 0.000575902 | -0.560016795 | 0.04 | 0.136 | 1 |
| Cfap43 | 0.000624338 | 0.526452467 | 0.17 | 0.058 | 1 |
| Cmip | 0.000632203 | 0.540145787 | 0.32 | 0.168 | 1 |
| mt-Co3 | 0.00063673 | -0.499142217 | 0.65 | 0.764 | 1 |
| Calm1 | 0.000647082 | -0.515260006 | 0.41 | 0.55 | 1 |
| Sel1l3 | 0.000660953 | 0.534926608 | 0.2 | 0.079 | 1 |
| Fam13c | 0.0006671 | 0.450971446 | 0.475 | 0.298 | 1 |
| Zfand4 | 0.000681253 | 0.409187752 | 0.26 | 0.115 | 1 |
| Atrnl1 | 0.000705569 | 0.482244003 | 0.305 | 0.157 | 1 |
| Slc22a23 | 0.000708963 | 0.368668907 | 0.65 | 0.429 | 1 |
| Crocc | 0.000809903 | 0.409073514 | 0.115 | 0.026 | 1 |
| Thsd7a | 0.000848606 | 0.46471047 | 0.325 | 0.173 | 1 |
| Peli2 | 0.000871476 | 0.501731525 | 0.62 | 0.497 | 1 |
| Gria2 | 0.000897574 | -0.440763616 | 0.725 | 0.759 | 1 |
| Gfap | 0.000933676 | 0.484833491 | 0.13 | 0.037 | 1 |
| Dcc | 0.000954463 | -0.561094303 | 0.705 | 0.775 | 1 |
| Gm17276 | 0.00099426 | 0.472033625 | 0.13 | 0.037 | 1 |
| Cep112 | 0.001030581 | 0.53345718 | 0.475 | 0.304 | 1 |
| Cmtm4 | 0.001031739 | -0.398358254 | 0.035 | 0.126 | 1 |
| Wsb2 | 0.00106623 | -0.460790878 | 0.045 | 0.141 | 1 |
| Igsf21 | 0.001099881 | 0.540289011 | 0.22 | 0.099 | 1 |
| Npas3 | 0.001150122 | 0.334192435 | 0.935 | 0.895 | 1 |
| Raver2 | 0.001164198 | -0.504060559 | 0.55 | 0.644 | 1 |
| Zwint | 0.001183103 | -0.467461588 | 0.285 | 0.429 | 1 |
| Gramd3 | 0.001218576 | 0.461493661 | 0.48 | 0.314 | 1 |
| Thap3 | 0.001227503 | 0.460742037 | 0.34 | 0.188 | 1 |
| Slc6a15 | 0.001260125 | -0.509195825 | 0.035 | 0.12 | 1 |
| Wdr89 | 0.001288777 | -0.502216636 | 0.15 | 0.283 | 1 |
| Lasp1 | 0.001308257 | 0.39956986 | 0.135 | 0.042 | 1 |
| Ube2o | 0.001358549 | -0.505721806 | 0.045 | 0.136 | 1 |
| Pebp1 | 0.001445374 | -0.537385946 | 0.185 | 0.314 | 1 |
| Zfp532 | 0.001451308 | 0.456682072 | 0.37 | 0.215 | 1 |
| Arf3 | 0.001469842 | -0.590685 | 0.22 | 0.34 | 1 |
| Rbm18 | 0.001474581 | 0.381458801 | 0.145 | 0.047 | 1 |
| Sulf1 | 0.001478757 | -0.654084718 | 0.055 | 0.152 | 1 |
| Cyp20a1 | 0.001553939 | 0.489847482 | 0.115 | 0.031 | 1 |
| Cuedc1 | 0.001665216 | 0.407565859 | 0.35 | 0.199 | 1 |
| Gm26551 | 0.001680001 | -0.598059913 | 0.125 | 0.236 | 1 |
| Wwc1 | 0.001684136 | 0.474266114 | 0.435 | 0.272 | 1 |
| Mfsd14b | 0.001745758 | 0.424672467 | 0.18 | 0.073 | 1 |
| Ccdc170 | 0.001752941 | 0.544421593 | 0.375 | 0.23 | 1 |
| Gsap | 0.001756861 | 0.441537928 | 0.225 | 0.105 | 1 |
| Ahi1 | 0.001839938 | 0.381481229 | 0.61 | 0.435 | 1 |
| Slc1a2 | 0.001851778 | 0.269496057 | 1 | 0.99 | 1 |
| Dhx30 | 0.001967463 | -0.464605597 | 0.2 | 0.33 | 1 |
| Ptprt | 0.001987775 | 0.311298466 | 0.95 | 0.911 | 1 |
| Rnf111 | 0.001993054 | -0.528099429 | 0.155 | 0.272 | 1 |
| Cpe | 0.002050844 | -0.292721539 | 0.935 | 0.969 | 1 |
| Grin2c | 0.002100679 | 0.481515117 | 0.145 | 0.052 | 1 |
| Shank2 | 0.002156674 | 0.628633472 | 0.23 | 0.115 | 1 |
| Sorl1 | 0.002159325 | 0.386009815 | 0.285 | 0.147 | 1 |
| Ttyh3 | 0.002246552 | 0.429474216 | 0.38 | 0.225 | 1 |
| Fgfr2 | 0.002343912 | -0.32309119 | 0.78 | 0.817 | 1 |
| Arpp21 | 0.002438347 | -0.355794213 | 0.395 | 0.539 | 1 |
| Ust | 0.002494162 | 0.463931676 | 0.26 | 0.131 | 1 |
| Rbms1 | 0.002566556 | 0.453947082 | 0.335 | 0.194 | 1 |
| R3hdm1 | 0.002602567 | -0.412634317 | 0.465 | 0.586 | 1 |
| Bach2 | 0.002675638 | 0.480784467 | 0.63 | 0.497 | 1 |
| St13 | 0.002752715 | -0.522062871 | 0.21 | 0.325 | 1 |
| E430024P14Rik | 0.002767427 | 0.401093971 | 0.1 | 0.026 | 1 |
| Cpt1c | 0.002851089 | 0.339156127 | 0.16 | 0.063 | 1 |
| Calm3 | 0.002898007 | -0.610644153 | 0.15 | 0.257 | 1 |
| Slc25a36 | 0.003036792 | 0.394295495 | 0.395 | 0.236 | 1 |
| Sdha | 0.003046141 | -0.521788521 | 0.19 | 0.298 | 1 |
| Ntng1 | 0.003191825 | 0.464294693 | 0.125 | 0.042 | 1 |
| Mertk | 0.003282239 | -0.402765887 | 0.515 | 0.654 | 1 |
| Top3b | 0.003307979 | 0.356793577 | 0.1 | 0.026 | 1 |
| Cacna1d | 0.003397367 | 0.320751781 | 0.395 | 0.236 | 1 |
| Iqsec1 | 0.003434663 | 0.480950013 | 0.425 | 0.288 | 1 |
| Mbp | 0.003462931 | 0.50419379 | 0.285 | 0.168 | 1 |
| Myh14 | 0.003468678 | 0.374352398 | 0.22 | 0.105 | 1 |
| Zfp956 | 0.003518656 | 0.413263859 | 0.14 | 0.052 | 1 |
| Pura | 0.003552685 | 0.448229816 | 0.355 | 0.204 | 1 |
| Memo1 | 0.003601937 | -0.512741653 | 0.21 | 0.33 | 1 |
| Asap1 | 0.00364749 | 0.331155689 | 0.39 | 0.236 | 1 |
| Spock3 | 0.003711019 | -0.370849778 | 0.48 | 0.597 | 1 |
| Calb1 | 0.003814929 | -0.587463831 | 0.1 | 0.194 | 1 |
| Nsg1 | 0.003844644 | -0.600283043 | 0.2 | 0.304 | 1 |
| Pkp2 | 0.003872489 | -0.443018932 | 0.14 | 0.246 | 1 |
| St3gal4 | 0.003888654 | -0.493660921 | 0.62 | 0.696 | 1 |
| Enox1 | 0.003908779 | 0.506313289 | 0.38 | 0.257 | 1 |
| Rgs20 | 0.0039207 | 0.256491481 | 0.965 | 0.937 | 1 |
| Phactr3 | 0.003936624 | 0.541430163 | 0.345 | 0.215 | 1 |
| Camk2g | 0.003943321 | 0.438257986 | 0.415 | 0.283 | 1 |
| AC149090.1 | 0.003984122 | 0.41011426 | 0.17 | 0.073 | 1 |
| Smc5 | 0.004021099 | 0.420915467 | 0.345 | 0.209 | 1 |
| Phka1 | 0.004064903 | -0.658891648 | 0.38 | 0.482 | 1 |
| Klf3 | 0.004185971 | 0.285288161 | 0.175 | 0.073 | 1 |
| 4932443I19Rik | 0.004270588 | 0.297891873 | 0.19 | 0.084 | 1 |
| 2610020C07Rik | 0.00461244 | -0.572345904 | 0.095 | 0.188 | 1 |
| E130307A14Rik | 0.00471795 | -0.549022012 | 0.31 | 0.408 | 1 |
| Kif27 | 0.004758737 | 0.410702771 | 0.21 | 0.105 | 1 |
| Ddo | 0.004818855 | 0.424248462 | 0.5 | 0.351 | 1 |
| Wdr41 | 0.005016093 | 0.369598862 | 0.21 | 0.099 | 1 |
| Eepd1 | 0.005023431 | 0.395743862 | 0.19 | 0.089 | 1 |
| Ndrg4 | 0.005114223 | -0.318227881 | 0.535 | 0.618 | 1 |
| Klf12 | 0.005150777 | 0.294858302 | 0.735 | 0.623 | 1 |
| Iqck | 0.005226844 | 0.400438926 | 0.4 | 0.257 | 1 |
| Scml4 | 0.005265782 | 0.355873304 | 0.42 | 0.283 | 1 |
| Fam227a | 0.005344226 | 0.319966222 | 0.205 | 0.099 | 1 |
| Fnbp1 | 0.005347839 | 0.322938609 | 0.665 | 0.524 | 1 |
| Adamts9 | 0.005369594 | 0.503500472 | 0.15 | 0.063 | 1 |
| Sacs | 0.005487097 | 0.308738422 | 0.205 | 0.099 | 1 |
| Chd1l | 0.005556747 | 0.31075886 | 0.145 | 0.058 | 1 |
| Atp5o | 0.005635074 | -0.441675938 | 0.235 | 0.351 | 1 |
| Ubb | 0.00563704 | -0.422282253 | 0.56 | 0.628 | 1 |
| Tbpl1 | 0.005710337 | 0.322542204 | 0.175 | 0.079 | 1 |
| Ptgr2 | 0.005748609 | 0.288760665 | 0.145 | 0.058 | 1 |
| Slc24a4 | 0.00577376 | -0.49017448 | 0.095 | 0.188 | 1 |
| Ttc39b | 0.005894472 | 0.289374634 | 0.11 | 0.037 | 1 |
| Glt8d1 | 0.005957956 | 0.420145716 | 0.25 | 0.136 | 1 |
| Apba1 | 0.005961553 | 0.478890457 | 0.255 | 0.147 | 1 |
| Mrfap1 | 0.0059617 | -0.475529956 | 0.135 | 0.236 | 1 |
| Kcnh1 | 0.006074311 | -0.46194604 | 0.04 | 0.11 | 1 |
| Etnppl | 0.006209557 | -0.57119613 | 0.08 | 0.168 | 1 |
| Jam2 | 0.00628621 | 0.376768238 | 0.165 | 0.073 | 1 |
| Gm16599 | 0.006355931 | -0.458435744 | 0.19 | 0.304 | 1 |
| R3hdm4 | 0.006410516 | 0.318029887 | 0.11 | 0.037 | 1 |
| Pacsin1 | 0.006422438 | -0.429957164 | 0.085 | 0.173 | 1 |
| Atxn2l | 0.006433822 | 0.38444287 | 0.24 | 0.131 | 1 |
| Knop1 | 0.006457452 | 0.345628284 | 0.18 | 0.084 | 1 |
| Efcab7 | 0.00650909 | 0.381031426 | 0.14 | 0.058 | 1 |
| Myrip | 0.006512396 | -0.435391983 | 0.08 | 0.168 | 1 |
| Hpca | 0.006555005 | -0.421935126 | 0.175 | 0.288 | 1 |
| Plekhb1 | 0.006579211 | 0.295879557 | 0.135 | 0.052 | 1 |
| Casp8ap2 | 0.006629024 | -0.363584772 | 0.035 | 0.105 | 1 |
| Copg1 | 0.006749989 | 0.35228201 | 0.17 | 0.079 | 1 |
| Nme5 | 0.00690467 | 0.393354404 | 0.21 | 0.11 | 1 |
| Clcn7 | 0.007030942 | 0.332582506 | 0.125 | 0.047 | 1 |
| Grm5 | 0.007053332 | -0.38420375 | 0.62 | 0.728 | 1 |
| Itm2c | 0.007097932 | -0.399839667 | 0.49 | 0.613 | 1 |
| 0610030E20Rik | 0.00721829 | 0.274139528 | 0.11 | 0.037 | 1 |
| Kansl1 | 0.007274378 | -0.39434566 | 0.705 | 0.743 | 1 |
| Csnk1g3 | 0.007451172 | -0.494721794 | 0.2 | 0.298 | 1 |
| Msantd2 | 0.007529448 | -0.473554203 | 0.19 | 0.293 | 1 |
| Pcdh10 | 0.007582931 | -0.362385092 | 0.425 | 0.524 | 1 |
| Top1 | 0.007592729 | -0.445469881 | 0.425 | 0.503 | 1 |
| Arhgap23 | 0.007780708 | 0.39826599 | 0.315 | 0.199 | 1 |
| Adcy10 | 0.00780417 | 0.28780595 | 0.1 | 0.031 | 1 |
| Srp72 | 0.007864776 | -0.447901873 | 0.07 | 0.152 | 1 |
| Grk3 | 0.008014908 | 0.286677316 | 0.59 | 0.424 | 1 |
| Yme1l1 | 0.008091157 | 0.28240684 | 0.32 | 0.188 | 1 |
| Tspan15 | 0.008188677 | 0.335856257 | 0.13 | 0.052 | 1 |
| Gm26782 | 0.008510594 | 0.307095193 | 0.115 | 0.042 | 1 |
| Epha3 | 0.008516604 | -0.519317373 | 0.22 | 0.325 | 1 |
| Nrg3 | 0.008563515 | 0.345845234 | 0.555 | 0.429 | 1 |
| Zadh2 | 0.008598931 | 0.352528245 | 0.185 | 0.089 | 1 |
| Slc44a1 | 0.008722343 | 0.405733203 | 0.235 | 0.131 | 1 |
| Pea15a | 0.0087457 | 0.388921114 | 0.175 | 0.084 | 1 |
| Ccdc190 | 0.008890237 | 0.337006141 | 0.155 | 0.068 | 1 |
| Ppp1r12a | 0.009086647 | 0.332001847 | 0.565 | 0.429 | 1 |
| Lingo2 | 0.009116204 | 0.343655223 | 0.53 | 0.372 | 1 |
| Ube2q2 | 0.009141793 | 0.304225854 | 0.185 | 0.089 | 1 |
| Tmsb10 | 0.009189467 | -0.36295867 | 0.055 | 0.131 | 1 |
| Fig4 | 0.009322794 | 0.380183213 | 0.17 | 0.079 | 1 |
| Wrn | 0.009387175 | 0.295196652 | 0.205 | 0.105 | 1 |
| Crebzf | 0.009470994 | 0.36120284 | 0.18 | 0.089 | 1 |
| Lpgat1 | 0.00965743 | 0.406145521 | 0.27 | 0.157 | 1 |
| Fkbp1a | 0.009776126 | -0.439988493 | 0.195 | 0.298 | 1 |
| Cbx7 | 0.009790489 | 0.365921736 | 0.16 | 0.073 | 1 |
| Slc20a1 | 0.009798171 | 0.441797797 | 0.205 | 0.11 | 1 |
| Parp6 | 0.009880707 | -0.450838559 | 0.11 | 0.199 | 1 |
| Mtmr3 | 0.009987663 | 0.356423723 | 0.485 | 0.351 | 1 |
| Ddx17 | 0.010053593 | 0.312590582 | 0.615 | 0.45 | 1 |
| Gulp1 | 0.010092127 | 0.368594236 | 0.39 | 0.257 | 1 |
| Mapt | 0.010101364 | 0.323995025 | 0.45 | 0.304 | 1 |
| Fgf14 | 0.010313257 | 0.281106333 | 0.94 | 0.921 | 1 |
| Atp1b1 | 0.010348739 | -0.321349416 | 0.675 | 0.733 | 1 |
| Rnf19a | 0.01035556 | -0.436615214 | 0.095 | 0.178 | 1 |
| Rtca | 0.010456548 | 0.277562951 | 0.105 | 0.037 | 1 |
| Ssbp2 | 0.010569062 | -0.300995561 | 0.705 | 0.775 | 1 |
| Plxna4 | 0.010756155 | 0.357403222 | 0.22 | 0.12 | 1 |
| Kirrel3 | 0.010820819 | 0.260382612 | 0.485 | 0.346 | 1 |
| Sugp1 | 0.010939086 | 0.335551829 | 0.145 | 0.063 | 1 |
| Chn1 | 0.010996754 | -0.347479512 | 0.33 | 0.445 | 1 |
| Hs6st3 | 0.011015658 | 0.393641674 | 0.295 | 0.178 | 1 |
| H2afz | 0.01103275 | -0.521607432 | 0.13 | 0.215 | 1 |
| Lclat1 | 0.011071643 | 0.268153815 | 0.145 | 0.063 | 1 |
| Pbxip1 | 0.011244269 | 0.442249861 | 0.2 | 0.105 | 1 |
| 4930557K07Rik | 0.01133113 | -0.390140813 | 0.04 | 0.105 | 1 |
| Caly | 0.011518743 | -0.300486118 | 0.115 | 0.204 | 1 |
| Rgs4 | 0.01154873 | -0.492452865 | 0.1 | 0.183 | 1 |
| Gpkow | 0.011792308 | -0.358093775 | 0.04 | 0.105 | 1 |
| Ufsp2 | 0.011927095 | -0.386953875 | 0.04 | 0.105 | 1 |
| Cog5 | 0.011961594 | -0.464692058 | 0.325 | 0.414 | 1 |
| Tac1 | 0.012028669 | -0.390795421 | 0.26 | 0.361 | 1 |
| Snhg11 | 0.012049718 | 0.297832622 | 0.73 | 0.613 | 1 |
| Cr1l | 0.012071308 | 0.36168339 | 0.215 | 0.12 | 1 |
| Atrx | 0.012122954 | 0.343065776 | 0.54 | 0.435 | 1 |
| Frem2 | 0.012181483 | 0.384002745 | 0.205 | 0.11 | 1 |
| Efna5 | 0.012455748 | -0.525524389 | 0.315 | 0.403 | 1 |
| Ksr2 | 0.01276276 | -0.328871553 | 0.29 | 0.398 | 1 |
| Gm45881 | 0.012953086 | 0.358991051 | 0.245 | 0.141 | 1 |
| Usp15 | 0.013078154 | 0.365910953 | 0.345 | 0.225 | 1 |
| Ssfa2 | 0.013106928 | -0.321791741 | 0.07 | 0.147 | 1 |
| Fars2 | 0.013135115 | 0.320493175 | 0.89 | 0.838 | 1 |
| Arl15 | 0.013253093 | -0.287643194 | 0.27 | 0.382 | 1 |
| Traf3 | 0.01336051 | 0.392154472 | 0.275 | 0.168 | 1 |
| Eif4a2 | 0.013660504 | -0.401345548 | 0.23 | 0.335 | 1 |
| Hspa8 | 0.013802014 | -0.400047482 | 0.35 | 0.445 | 1 |
| Chst11 | 0.013927154 | 0.33450044 | 0.245 | 0.141 | 1 |
| Unc79 | 0.014033731 | -0.426026951 | 0.17 | 0.267 | 1 |
| Gspt1 | 0.01415157 | -0.435944715 | 0.125 | 0.209 | 1 |
| Mfap3 | 0.014193675 | 0.276995701 | 0.155 | 0.073 | 1 |
| Syt7 | 0.01423427 | 0.311474167 | 0.125 | 0.052 | 1 |
| Dhx57 | 0.014260584 | 0.332446721 | 0.215 | 0.115 | 1 |
| Notch1 | 0.014307152 | 0.385724995 | 0.385 | 0.262 | 1 |
| Syne1 | 0.014322674 | 0.396237281 | 0.55 | 0.435 | 1 |
| Dlst | 0.014334037 | -0.37016968 | 0.115 | 0.199 | 1 |
| Ubr5 | 0.014364905 | -0.393631026 | 0.37 | 0.455 | 1 |
| Rtl8a | 0.014472742 | -0.423052067 | 0.07 | 0.141 | 1 |
| Rpl9-ps6 | 0.014630118 | -0.473242862 | 0.255 | 0.351 | 1 |
| Dock1 | 0.014697538 | 0.280732564 | 0.685 | 0.565 | 1 |
| Slk | 0.015314313 | 0.322433569 | 0.26 | 0.152 | 1 |
| Actg1 | 0.015333232 | -0.383881972 | 0.275 | 0.372 | 1 |
| Maml3 | 0.015509133 | 0.424075882 | 0.285 | 0.178 | 1 |
| Atp6v0a2 | 0.015522825 | -0.357766913 | 0.08 | 0.157 | 1 |
| Cspg5 | 0.015711439 | 0.281641131 | 0.725 | 0.586 | 1 |
| Fermt2 | 0.015824518 | 0.300255663 | 0.375 | 0.246 | 1 |
| Kcmf1 | 0.01596572 | 0.330127967 | 0.245 | 0.147 | 1 |
| Luzp1 | 0.016043989 | 0.387644184 | 0.295 | 0.183 | 1 |
| Akap9 | 0.016166146 | 0.310635857 | 0.52 | 0.387 | 1 |
| Acadl | 0.016232839 | 0.313668118 | 0.13 | 0.058 | 1 |
| Tomm20 | 0.016246255 | -0.390598809 | 0.065 | 0.136 | 1 |
| Nap1l4 | 0.016284521 | 0.361911181 | 0.135 | 0.063 | 1 |
| Znhit1 | 0.016308424 | 0.269175179 | 0.115 | 0.047 | 1 |
| Tjp1 | 0.016357951 | 0.399056632 | 0.415 | 0.288 | 1 |
| Idh2 | 0.016440663 | -0.420603761 | 0.095 | 0.173 | 1 |
| Ccdc114 | 0.016765996 | 0.391711601 | 0.335 | 0.22 | 1 |
| Kif24 | 0.016821018 | 0.456221266 | 0.14 | 0.068 | 1 |
| Tead1 | 0.016824834 | 0.332282837 | 0.565 | 0.44 | 1 |
| Kcnb2 | 0.01717547 | 0.388473032 | 0.15 | 0.073 | 1 |
| Ccdc148 | 0.017528178 | 0.326700116 | 0.3 | 0.199 | 1 |
| Naa35 | 0.017592664 | 0.31935667 | 0.185 | 0.099 | 1 |
| Tmem209 | 0.017611181 | 0.272575552 | 0.115 | 0.047 | 1 |
| Polr3b | 0.017734544 | 0.367619213 | 0.125 | 0.058 | 1 |
| Penk | 0.01800267 | -0.320771463 | 0.39 | 0.508 | 1 |
| Esrrg | 0.018057021 | 0.293471235 | 0.105 | 0.042 | 1 |
| Rb1 | 0.018094219 | 0.271952254 | 0.47 | 0.34 | 1 |
| Prdx2 | 0.018212792 | -0.286648875 | 0.1 | 0.183 | 1 |
| Khdrbs1 | 0.018307956 | 0.317164288 | 0.34 | 0.225 | 1 |
| Trmt1 | 0.018542935 | 0.260735097 | 0.105 | 0.042 | 1 |
| 6330403K07Rik | 0.01867645 | 0.261557038 | 0.25 | 0.147 | 1 |
| Ext2 | 0.01883694 | 0.4051877 | 0.195 | 0.11 | 1 |
| Thoc1 | 0.018849299 | 0.287544959 | 0.18 | 0.094 | 1 |
| Trappc6b | 0.019077639 | -0.380057238 | 0.16 | 0.246 | 1 |
| Slc35e2 | 0.019094289 | 0.256501323 | 0.12 | 0.052 | 1 |
| Ptprk | 0.019094289 | 0.369593604 | 0.12 | 0.052 | 1 |
| Inpp4b | 0.019146055 | 0.33062223 | 0.17 | 0.089 | 1 |
| Lzts3 | 0.01922939 | -0.265069619 | 0.095 | 0.178 | 1 |
| Plppr4 | 0.019287225 | -0.371284134 | 0.295 | 0.382 | 1 |
| Gm9843 | 0.019329978 | -0.510165452 | 0.17 | 0.251 | 1 |
| Tspan12 | 0.019352809 | 0.387860802 | 0.285 | 0.178 | 1 |
| Klhl9 | 0.019568174 | -0.349826292 | 0.055 | 0.12 | 1 |
| Plekha7 | 0.019683723 | 0.373022831 | 0.355 | 0.251 | 1 |
| Arhgef19 | 0.020092438 | 0.273997196 | 0.18 | 0.094 | 1 |
| Emc2 | 0.020392562 | -0.385194211 | 0.08 | 0.152 | 1 |
| Ak9 | 0.020447096 | 0.328346503 | 0.12 | 0.052 | 1 |
| Spin1 | 0.020730821 | -0.426524592 | 0.135 | 0.215 | 1 |
| Pram1 | 0.020829519 | 0.251445978 | 0.11 | 0.047 | 1 |
| Pdzrn3 | 0.020852825 | 0.455690853 | 0.31 | 0.215 | 1 |
| Pcx | 0.020856796 | 0.323473705 | 0.265 | 0.162 | 1 |
| Sall3 | 0.0210182 | -0.497022682 | 0.165 | 0.257 | 1 |
| Gsdme | 0.021170178 | -0.335084742 | 0.095 | 0.173 | 1 |
| Armc2 | 0.021246969 | 0.287819999 | 0.48 | 0.361 | 1 |
| Sox9 | 0.021319854 | 0.298919447 | 0.23 | 0.136 | 1 |
| 3110082I17Rik | 0.021346646 | 0.410759057 | 0.145 | 0.073 | 1 |
| Adgrv1 | 0.021559574 | -0.402422875 | 0.39 | 0.513 | 1 |
| Swt1 | 0.021968511 | -0.389696511 | 0.19 | 0.277 | 1 |
| Erbb4 | 0.022052634 | 0.327609115 | 0.615 | 0.476 | 1 |
| Dnajc11 | 0.022138127 | 0.300353666 | 0.135 | 0.063 | 1 |
| Rab3a | 0.022154046 | -0.410703213 | 0.125 | 0.209 | 1 |
| Kcnn3 | 0.022478109 | 0.256871701 | 0.275 | 0.168 | 1 |
| Mapkap1 | 0.022696502 | -0.309885272 | 0.225 | 0.33 | 1 |
| Csnk1g1 | 0.022910326 | -0.384063277 | 0.275 | 0.366 | 1 |
| Agbl4 | 0.022919806 | 0.462277046 | 0.6 | 0.524 | 1 |
| Zfp652 | 0.022928023 | -0.445120919 | 0.105 | 0.178 | 1 |
| Tbp | 0.022977466 | -0.339690835 | 0.045 | 0.105 | 1 |
| Gpr88 | 0.023001292 | -0.375914285 | 0.465 | 0.555 | 1 |
| Cd2ap | 0.023314813 | 0.387506938 | 0.285 | 0.199 | 1 |
| Psmb1 | 0.023379365 | -0.304198886 | 0.09 | 0.168 | 1 |
| Hnrnpm | 0.023509037 | 0.332021629 | 0.4 | 0.288 | 1 |
| Ramp1 | 0.02354323 | 0.426748115 | 0.195 | 0.115 | 1 |
| Tia1 | 0.023625386 | -0.317311953 | 0.225 | 0.33 | 1 |
| Msl2 | 0.023631863 | 0.406298227 | 0.145 | 0.073 | 1 |
| Sncaip | 0.023917433 | -0.41470666 | 0.335 | 0.44 | 1 |
| Gtpbp2 | 0.023952177 | 0.325678402 | 0.115 | 0.052 | 1 |
| Gm20388 | 0.024077372 | -0.380180898 | 0.75 | 0.775 | 1 |
| Cnbd2 | 0.024419241 | 0.310678087 | 0.115 | 0.052 | 1 |
| Smim4 | 0.024711434 | -0.328792974 | 0.085 | 0.157 | 1 |
| Gpr6 | 0.024820571 | -0.326202914 | 0.05 | 0.11 | 1 |
| Aifm3 | 0.024938782 | 0.272451199 | 0.155 | 0.079 | 1 |
| Fbxl20 | 0.0251403 | 0.267085975 | 0.32 | 0.215 | 1 |
| Rab1 | 0.025159096 | -0.470909097 | 0.135 | 0.209 | 1 |
| Gm44593 | 0.025317871 | 0.6190023 | 0.195 | 0.12 | 1 |
| Zmynd8 | 0.025437172 | 0.293979532 | 0.26 | 0.157 | 1 |
| Man2c1os | 0.025482581 | 0.30293892 | 0.165 | 0.089 | 1 |
| Immp1l | 0.025494996 | -0.423228698 | 0.24 | 0.319 | 1 |
| Eno2 | 0.025602931 | -0.487244726 | 0.17 | 0.251 | 1 |
| Sik2 | 0.025930418 | 0.274086095 | 0.275 | 0.178 | 1 |
| Cyth1 | 0.026007377 | 0.289639478 | 0.325 | 0.22 | 1 |
| Asrgl1 | 0.026015504 | 0.270196279 | 0.515 | 0.382 | 1 |
| Cklf | 0.026041003 | 0.291465064 | 0.135 | 0.068 | 1 |
| Kdm3a | 0.026089488 | -0.425751503 | 0.21 | 0.293 | 1 |
| 9330159F19Rik | 0.026140838 | -0.337860679 | 0.245 | 0.34 | 1 |
| Gm35188 | 0.026202682 | -0.457044967 | 0.475 | 0.508 | 1 |
| Gstz1 | 0.026358199 | 0.32217528 | 0.165 | 0.089 | 1 |
| mt-Atp6 | 0.026382878 | -0.250142935 | 0.73 | 0.775 | 1 |
| Sh3glb2 | 0.0264247 | -0.328050891 | 0.065 | 0.131 | 1 |
| Gpr155 | 0.026543187 | -0.307689492 | 0.065 | 0.131 | 1 |
| Btbd10 | 0.026555232 | -0.423058554 | 0.13 | 0.204 | 1 |
| Mdm4 | 0.026564135 | 0.261304028 | 0.37 | 0.257 | 1 |
| Srp68 | 0.02669814 | 0.27681168 | 0.1 | 0.042 | 1 |
| Rsph10b | 0.026938729 | 0.339015593 | 0.17 | 0.094 | 1 |
| Mrps18a | 0.027251761 | 0.313587352 | 0.1 | 0.042 | 1 |
| Gng7 | 0.027357141 | -0.289351262 | 0.115 | 0.199 | 1 |
| Nin | 0.027381664 | -0.337364332 | 0.075 | 0.141 | 1 |
| Meis1 | 0.027634237 | 0.35673672 | 0.185 | 0.105 | 1 |
| Rasgrp1 | 0.027668546 | -0.384985349 | 0.225 | 0.309 | 1 |
| Cstf2 | 0.027783207 | -0.336347277 | 0.055 | 0.115 | 1 |
| G630016G05Rik | 0.027944497 | 0.312791792 | 0.185 | 0.105 | 1 |
| Hnrnpu | 0.02811139 | -0.291559665 | 0.385 | 0.482 | 1 |
| Bcl11a | 0.028112568 | -0.353481544 | 0.11 | 0.188 | 1 |
| Gm47167 | 0.028180565 | -0.350925127 | 0.055 | 0.115 | 1 |
| Cers6 | 0.028304722 | 0.354393149 | 0.15 | 0.079 | 1 |
| Egr1 | 0.02832836 | -0.401201573 | 0.075 | 0.141 | 1 |
| Copb1 | 0.028446566 | -0.45026563 | 0.13 | 0.204 | 1 |
| Pfdn5 | 0.02847476 | -0.285506284 | 0.05 | 0.11 | 1 |
| Ankrd42 | 0.028592564 | 0.354447564 | 0.105 | 0.047 | 1 |
| Parn | 0.028856624 | -0.427322516 | 0.145 | 0.22 | 1 |
| Rab33b | 0.028914213 | -0.313872965 | 0.06 | 0.12 | 1 |
| 2900097C17Rik | 0.028966507 | -0.431188048 | 0.325 | 0.408 | 1 |
| Mga | 0.029145041 | -0.376996333 | 0.33 | 0.408 | 1 |
| Slc1a1 | 0.029315464 | -0.273645076 | 0.05 | 0.11 | 1 |
| Uba6 | 0.029502427 | -0.352820603 | 0.095 | 0.168 | 1 |
| Bcar3 | 0.029711898 | 0.342646222 | 0.425 | 0.33 | 1 |
| Arhgef2 | 0.029775352 | 0.290397728 | 0.165 | 0.089 | 1 |
| Gria4 | 0.030051208 | 0.302767271 | 0.28 | 0.183 | 1 |
| Plekhm2 | 0.030168582 | 0.335963505 | 0.26 | 0.168 | 1 |
| Trim12a | 0.03024268 | 0.271428646 | 0.17 | 0.094 | 1 |
| Ube2d3 | 0.030406643 | -0.298532381 | 0.315 | 0.419 | 1 |
| Zmiz1 | 0.031543915 | 0.412418433 | 0.515 | 0.408 | 1 |
| Nme7 | 0.031581154 | -0.282620461 | 0.395 | 0.482 | 1 |
| Sntg2 | 0.031644486 | 0.289058001 | 0.205 | 0.12 | 1 |
| Grina | 0.031646867 | -0.403699024 | 0.25 | 0.335 | 1 |
| Coq3 | 0.032000237 | 0.272144556 | 0.14 | 0.073 | 1 |
| Rapgef1 | 0.032521109 | 0.332333785 | 0.25 | 0.162 | 1 |
| Sgce | 0.032746135 | 0.28163256 | 0.34 | 0.236 | 1 |
| Id3 | 0.032757573 | 0.267047329 | 0.17 | 0.094 | 1 |
| Tceal9 | 0.033037145 | -0.357110821 | 0.055 | 0.115 | 1 |
| Hepacam | 0.033652732 | -0.282276675 | 0.53 | 0.597 | 1 |
| Gab1 | 0.033791354 | -0.271045532 | 0.405 | 0.503 | 1 |
| Lrp8 | 0.033868063 | 0.330711233 | 0.165 | 0.094 | 1 |
| Dip2b | 0.033961035 | 0.271167796 | 0.365 | 0.251 | 1 |
| Pspc1 | 0.033997887 | 0.258951597 | 0.325 | 0.22 | 1 |
| Zfp512 | 0.034149362 | 0.286665357 | 0.205 | 0.12 | 1 |
| Ttf1 | 0.03419474 | -0.281021071 | 0.06 | 0.12 | 1 |
| Mipol1 | 0.03419937 | 0.405247742 | 0.26 | 0.173 | 1 |
| Tsc22d3 | 0.034348207 | -0.278857304 | 0.06 | 0.12 | 1 |
| Cul1 | 0.034510484 | -0.297691566 | 0.31 | 0.393 | 1 |
| Gm26749 | 0.03472705 | -0.358591888 | 0.07 | 0.131 | 1 |
| Dhtkd1 | 0.034730196 | 0.281381434 | 0.21 | 0.126 | 1 |
| Nbr1 | 0.034949559 | 0.35074299 | 0.22 | 0.136 | 1 |
| Prpsap1 | 0.035343247 | 0.311131883 | 0.11 | 0.052 | 1 |
| Slc22a17 | 0.035601144 | -0.323946464 | 0.375 | 0.445 | 1 |
| Itpr1 | 0.03572552 | -0.312491584 | 0.355 | 0.44 | 1 |
| Nipa2 | 0.035813903 | -0.303658587 | 0.08 | 0.147 | 1 |
| Abce1 | 0.035848966 | 0.282100638 | 0.17 | 0.094 | 1 |
| Hectd2 | 0.036667756 | 0.277539053 | 0.14 | 0.073 | 1 |
| Psmc1 | 0.036710396 | 0.329127274 | 0.125 | 0.063 | 1 |
| Ncdn | 0.036993289 | -0.391473176 | 0.255 | 0.33 | 1 |
| Ntm | 0.037216362 | 0.265076193 | 0.95 | 0.921 | 1 |
| Rab11fip3 | 0.037399631 | 0.256986836 | 0.3 | 0.199 | 1 |
| Lcor | 0.037536506 | -0.326601071 | 0.315 | 0.414 | 1 |
| Col11a2 | 0.037634199 | 0.346704143 | 0.13 | 0.068 | 1 |
| Dnah5 | 0.037634953 | 0.278819958 | 0.165 | 0.094 | 1 |
| Srpk1 | 0.037677174 | -0.35605585 | 0.105 | 0.173 | 1 |
| Supt16 | 0.038178921 | 0.266502706 | 0.145 | 0.079 | 1 |
| Itga6 | 0.038188958 | 0.281320859 | 0.18 | 0.105 | 1 |
| Lsm1 | 0.038229048 | -0.351289207 | 0.055 | 0.11 | 1 |
| Eya2 | 0.038386887 | -0.330002478 | 0.115 | 0.188 | 1 |
| Adcy5 | 0.038471329 | -0.35957416 | 0.265 | 0.335 | 1 |
| Sae1 | 0.038565654 | -0.344594051 | 0.05 | 0.105 | 1 |
| Mal | 0.038631583 | 0.266316754 | 0.22 | 0.136 | 1 |
| Paqr7 | 0.038936451 | 0.250064248 | 0.11 | 0.052 | 1 |
| Rgs7 | 0.039013892 | 0.450125362 | 0.45 | 0.382 | 1 |
| Pou3f1 | 0.039115275 | -0.339828077 | 0.05 | 0.105 | 1 |
| Cdkl5 | 0.039329509 | -0.370224 | 0.14 | 0.22 | 1 |
| Rev1 | 0.039341302 | 0.291514565 | 0.355 | 0.257 | 1 |
| Marcks | 0.039568609 | -0.336389955 | 0.195 | 0.277 | 1 |
| Phkb | 0.040027573 | 0.316807008 | 0.59 | 0.461 | 1 |
| Hmgb1 | 0.040107119 | 0.271408971 | 0.225 | 0.141 | 1 |
| Gm10561 | 0.040162129 | 0.391280739 | 0.195 | 0.12 | 1 |
| Lrrc19 | 0.040234493 | -0.318570551 | 0.05 | 0.105 | 1 |
| Mctp1 | 0.04030913 | 0.352874745 | 0.325 | 0.22 | 1 |
| Ppp1r2 | 0.041064245 | -0.368654698 | 0.3 | 0.393 | 1 |
| Rpgr | 0.04110338 | 0.267048476 | 0.32 | 0.22 | 1 |
| Usp2 | 0.041190867 | -0.320521103 | 0.16 | 0.236 | 1 |
| 2810403A07Rik | 0.041287169 | -0.306541812 | 0.195 | 0.288 | 1 |
| Sema6a | 0.041403971 | 0.352794895 | 0.585 | 0.508 | 1 |
| Anks1 | 0.041538991 | 0.329463844 | 0.265 | 0.178 | 1 |
| Miat | 0.041560862 | 0.334089308 | 0.17 | 0.099 | 1 |
| Tmem30a | 0.041664974 | -0.345158319 | 0.255 | 0.335 | 1 |
| Eef1a1 | 0.041700396 | -0.322636709 | 0.5 | 0.55 | 1 |
| Cnot6l | 0.041874542 | -0.323254999 | 0.18 | 0.262 | 1 |
| Tnfrsf19 | 0.042251562 | 0.328927686 | 0.565 | 0.455 | 1 |
| Psmd2 | 0.042642458 | -0.353369322 | 0.055 | 0.11 | 1 |
| Lrrc8d | 0.042785822 | 0.263251724 | 0.18 | 0.105 | 1 |
| Eef2k | 0.042946385 | 0.292646452 | 0.195 | 0.115 | 1 |
| Mapkapk2 | 0.042998359 | -0.250351623 | 0.07 | 0.131 | 1 |
| Asph | 0.043349623 | 0.298507445 | 0.26 | 0.173 | 1 |
| Sash1 | 0.043544822 | 0.364095638 | 0.48 | 0.382 | 1 |
| Plekha5 | 0.043555658 | 0.271323691 | 0.5 | 0.372 | 1 |
| Abhd18 | 0.043651031 | -0.385451618 | 0.265 | 0.346 | 1 |
| Nxph1 | 0.043710628 | 0.391924607 | 0.135 | 0.073 | 1 |
| Orc3 | 0.044026086 | -0.394310844 | 0.145 | 0.215 | 1 |
| Cacna1c | 0.044307655 | 0.400021473 | 0.19 | 0.115 | 1 |
| Nebl | 0.044322813 | 0.468198146 | 0.445 | 0.372 | 1 |
| Galk2 | 0.044635488 | 0.31719773 | 0.175 | 0.105 | 1 |
| Mro | 0.044750481 | -0.380376294 | 0.095 | 0.157 | 1 |
| Ccdc62 | 0.044793006 | 0.298153596 | 0.175 | 0.105 | 1 |
| Gria1 | 0.045088937 | -0.376382346 | 0.275 | 0.361 | 1 |
| Dram2 | 0.045201928 | 0.276999577 | 0.145 | 0.079 | 1 |
| Efnb2 | 0.045747788 | -0.364114763 | 0.185 | 0.257 | 1 |
| Fam20a | 0.045911411 | 0.319554039 | 0.165 | 0.094 | 1 |
| Gm15991 | 0.046023049 | -0.264414907 | 0.055 | 0.11 | 1 |
| Nemf | 0.046161289 | -0.373916797 | 0.195 | 0.267 | 1 |
| Tet2 | 0.046244366 | 0.35025379 | 0.29 | 0.209 | 1 |
| Rassf8 | 0.046272545 | 0.282645898 | 0.155 | 0.089 | 1 |
| Pwwp2a | 0.04637126 | 0.296573889 | 0.265 | 0.178 | 1 |
| Cisd2 | 0.046570099 | -0.263117865 | 0.13 | 0.204 | 1 |
| Ube2e3 | 0.046627382 | 0.279512661 | 0.22 | 0.141 | 1 |
| Yes1 | 0.046848071 | 0.314451892 | 0.22 | 0.141 | 1 |
| Usp40 | 0.046922948 | 0.272461315 | 0.23 | 0.147 | 1 |
| Ranbp10 | 0.047170967 | -0.320566808 | 0.12 | 0.188 | 1 |
| Ggta1 | 0.047172849 | 0.299035559 | 0.26 | 0.178 | 1 |
| Tab3 | 0.047241414 | -0.275336782 | 0.07 | 0.131 | 1 |
| Gpatch2l | 0.047346789 | -0.271312462 | 0.075 | 0.136 | 1 |
| Hsph1 | 0.047624692 | -0.325326402 | 0.115 | 0.183 | 1 |
| Eif2s3y | 0.047732295 | 0.405885088 | 0.31 | 0.22 | 1 |
| Dcun1d5 | 0.047889238 | -0.332921351 | 0.105 | 0.173 | 1 |
| Pptc7 | 0.048044461 | 0.262645435 | 0.175 | 0.105 | 1 |
| Slc20a2 | 0.04817922 | 0.250185056 | 0.245 | 0.157 | 1 |
| Micu2 | 0.048361967 | 0.28462827 | 0.18 | 0.11 | 1 |
| Zcchc24 | 0.048493096 | 0.272368415 | 0.22 | 0.141 | 1 |
| Phf20 | 0.048853692 | 0.332344241 | 0.315 | 0.225 | 1 |
| Zfp763 | 0.049279116 | 0.326725475 | 0.105 | 0.052 | 1 |
| Atp5b | 0.049446625 | -0.330700225 | 0.23 | 0.314 | 1 |
| Ivns1abp | 0.049647703 | -0.349560766 | 0.175 | 0.246 | 1 |
| Nfkb1 | 0.049879871 | 0.321996262 | 0.365 | 0.267 | 1 |
| Rheb | 0.050126195 | -0.317867186 | 0.16 | 0.23 | 1 |
| Erc2 | 0.050162838 | -0.294803276 | 0.34 | 0.424 | 1 |
| Hivep1 | 0.05028128 | 0.307038253 | 0.155 | 0.089 | 1 |
| Dpysl2 | 0.050378304 | -0.294574422 | 0.315 | 0.398 | 1 |
| Zfp423 | 0.050594347 | 0.275151327 | 0.23 | 0.147 | 1 |
| Ccdc60 | 0.05084407 | 0.321595026 | 0.105 | 0.052 | 1 |
| Ezh1 | 0.050969149 | -0.328016583 | 0.095 | 0.157 | 1 |
| Wsb1 | 0.05106052 | 0.311155972 | 0.345 | 0.251 | 1 |
| Fam13a | 0.051487487 | 0.317817462 | 0.2 | 0.126 | 1 |
| Peg3 | 0.051498583 | -0.409162852 | 0.33 | 0.393 | 1 |
| Cpne2 | 0.051599342 | 0.313591234 | 0.18 | 0.11 | 1 |
| H2afv | 0.051731468 | -0.340548247 | 0.105 | 0.168 | 1 |
| Gm20422 | 0.051829671 | 0.257358627 | 0.12 | 0.063 | 1 |
| Zfhx4 | 0.052020039 | 0.321761857 | 0.535 | 0.44 | 1 |
| Hnrnpul2 | 0.052894005 | -0.319942237 | 0.1 | 0.162 | 1 |
| Acad10 | 0.052914045 | -0.290067107 | 0.065 | 0.12 | 1 |
| Nup160 | 0.052943645 | -0.388500585 | 0.08 | 0.136 | 1 |
| Itm2b | 0.053094508 | -0.260352466 | 0.49 | 0.56 | 1 |
| Gas7 | 0.053254054 | -0.334328558 | 0.09 | 0.152 | 1 |
| Abcc1 | 0.053257732 | -0.330217183 | 0.075 | 0.131 | 1 |
| Lrrc9 | 0.053286421 | 0.256071412 | 0.425 | 0.33 | 1 |
| Sgcd | 0.05374379 | -0.540070558 | 0.34 | 0.408 | 1 |
| 4930517O19Rik | 0.054156113 | -0.335733424 | 0.135 | 0.204 | 1 |
| Tcerg1 | 0.054248111 | -0.30359849 | 0.15 | 0.22 | 1 |
| Zfp462 | 0.054581974 | 0.268861026 | 0.43 | 0.33 | 1 |
| Strbp | 0.055008023 | -0.264115831 | 0.74 | 0.754 | 1 |
| Tubb2a | 0.05513196 | -0.415482446 | 0.14 | 0.204 | 1 |
| Ttll11 | 0.055162425 | 0.328102966 | 0.145 | 0.084 | 1 |
| Ryr3 | 0.055183755 | 0.322991942 | 0.33 | 0.23 | 1 |
| Ntn1 | 0.055350062 | -0.58107779 | 0.165 | 0.225 | 1 |
| Gm32250 | 0.055377865 | -0.35974106 | 0.1 | 0.162 | 1 |
| Lsm14a | 0.055508507 | 0.283693333 | 0.225 | 0.147 | 1 |
| Tfdp2 | 0.055902736 | -0.269191068 | 0.265 | 0.34 | 1 |
| Srek1 | 0.055930789 | 0.317451885 | 0.46 | 0.372 | 1 |
| Sec11a | 0.055964664 | -0.328620539 | 0.1 | 0.162 | 1 |
| Cog3 | 0.056149461 | -0.304539672 | 0.07 | 0.126 | 1 |
| Eaf2 | 0.056185391 | -0.328441638 | 0.11 | 0.173 | 1 |
| Dcdc2a | 0.056403883 | 0.320674244 | 0.145 | 0.084 | 1 |
| Vps13b | 0.056754828 | 0.265591212 | 0.545 | 0.445 | 1 |
| Ap2m1 | 0.05688793 | -0.361076327 | 0.06 | 0.11 | 1 |
| Prrx1 | 0.056944348 | -0.308366533 | 0.415 | 0.492 | 1 |
| Dbx2 | 0.057025695 | 0.378873209 | 0.105 | 0.052 | 1 |
| Rpn2 | 0.057281591 | -0.311900942 | 0.09 | 0.152 | 1 |
| Zfp1 | 0.05743566 | -0.302043609 | 0.085 | 0.141 | 1 |
| Ctnnbip1 | 0.057677533 | 0.257398464 | 0.12 | 0.063 | 1 |
| Ppfia2 | 0.057763037 | -0.48538751 | 0.2 | 0.257 | 1 |
| Arfgef1 | 0.057951188 | 0.27016735 | 0.385 | 0.272 | 1 |
| Ghr | 0.058497213 | -0.326192938 | 0.265 | 0.34 | 1 |
| Atp1b2 | 0.058586194 | 0.287818292 | 0.205 | 0.131 | 1 |
| Tug1 | 0.058591961 | -0.314075807 | 0.08 | 0.136 | 1 |
| Wipf2 | 0.058759086 | 0.255522755 | 0.21 | 0.136 | 1 |
| Serp2 | 0.05879294 | 0.252027961 | 0.105 | 0.052 | 1 |
| Fbxo36 | 0.058904266 | 0.28575132 | 0.14 | 0.079 | 1 |
| Auh | 0.058910987 | 0.316472271 | 0.19 | 0.12 | 1 |
| Gm48678 | 0.058915804 | -0.2933436 | 0.18 | 0.257 | 1 |
| Gca | 0.05896204 | 0.282485515 | 0.15 | 0.089 | 1 |
| Zfp704 | 0.05948326 | 0.294613204 | 0.19 | 0.12 | 1 |
| Gm4221 | 0.059639987 | 0.307398057 | 0.27 | 0.188 | 1 |
| Cdh19 | 0.059960223 | -0.434836879 | 0.165 | 0.23 | 1 |
| Prex1 | 0.059995661 | 0.266962496 | 0.18 | 0.11 | 1 |
| Myo5a | 0.060071309 | -0.413498256 | 0.32 | 0.382 | 1 |
| Pard3bos1 | 0.060428015 | -0.363161135 | 0.105 | 0.168 | 1 |
| Fus | 0.0604406 | -0.310254963 | 0.535 | 0.555 | 1 |
| Ndufb3 | 0.060448998 | -0.30717447 | 0.075 | 0.131 | 1 |
| Hnrnpk | 0.060517836 | -0.378087026 | 0.205 | 0.277 | 1 |
| Eif3h | 0.060787496 | -0.277055247 | 0.07 | 0.126 | 1 |
| Hdac8 | 0.060835138 | 0.263465285 | 0.825 | 0.754 | 1 |
| Bex1 | 0.060844097 | -0.454074101 | 0.065 | 0.115 | 1 |
| Nlk | 0.061197029 | -0.374840331 | 0.285 | 0.356 | 1 |
| Pid1 | 0.061527058 | 0.286701076 | 0.51 | 0.419 | 1 |
| Ppara | 0.061983968 | 0.35182201 | 0.17 | 0.105 | 1 |
| Dynll1 | 0.061996551 | -0.361439314 | 0.235 | 0.304 | 1 |
| Zfp521 | 0.062476443 | -0.318908105 | 0.445 | 0.529 | 1 |
| Zfp326 | 0.062478418 | -0.312852221 | 0.14 | 0.209 | 1 |
| Mns1 | 0.062612598 | 0.300875803 | 0.17 | 0.105 | 1 |
| Gapvd1 | 0.062852969 | -0.37269178 | 0.255 | 0.314 | 1 |
| Gm26691 | 0.063345436 | -0.392443649 | 0.115 | 0.178 | 1 |
| Tpk1 | 0.063413162 | -0.316538028 | 0.11 | 0.173 | 1 |
| Csnk1e | 0.063468736 | -0.344077832 | 0.06 | 0.11 | 1 |
| Lars2 | 0.063583811 | 0.253332167 | 0.35 | 0.262 | 1 |
| Dnm1 | 0.063761774 | -0.378864294 | 0.115 | 0.178 | 1 |
| 3110043O21Rik | 0.064369402 | -0.283612509 | 0.055 | 0.105 | 1 |
| Tubgcp4 | 0.064645483 | -0.317830542 | 0.055 | 0.105 | 1 |
| Nipa1 | 0.064767488 | 0.296528981 | 0.195 | 0.126 | 1 |
| Dcaf1 | 0.064904936 | -0.283909265 | 0.135 | 0.199 | 1 |
| Lrrc49 | 0.0650065 | -0.389937462 | 0.24 | 0.304 | 1 |
| B230334C09Rik | 0.065236794 | -0.288677262 | 0.115 | 0.178 | 1 |
| Tpcn1 | 0.065240306 | 0.251289982 | 0.29 | 0.204 | 1 |
| Abcc5 | 0.065493365 | -0.32111445 | 0.3 | 0.382 | 1 |
| Fam110b | 0.065778479 | -0.326514999 | 0.205 | 0.283 | 1 |
| App | 0.06625412 | -0.271129947 | 0.62 | 0.654 | 1 |
| Arl3 | 0.066471437 | 0.338685381 | 0.345 | 0.246 | 1 |
| Hsp90ab1 | 0.067347174 | -0.367261082 | 0.29 | 0.351 | 1 |
| Zswim5 | 0.068037398 | -0.361387883 | 0.09 | 0.147 | 1 |
| Akap8 | 0.068121182 | -0.406405162 | 0.155 | 0.215 | 1 |
| Exoc3 | 0.06815348 | -0.352019587 | 0.13 | 0.188 | 1 |
| Fubp1 | 0.06821344 | -0.28871841 | 0.395 | 0.44 | 1 |
| Utp6 | 0.068424305 | -0.284853601 | 0.065 | 0.115 | 1 |
| Bex2 | 0.068435417 | -0.410451842 | 0.285 | 0.335 | 1 |
| Dlg4 | 0.068936215 | -0.402105303 | 0.145 | 0.204 | 1 |
| Rangap1 | 0.068948498 | -0.256523286 | 0.06 | 0.11 | 1 |
| C4b | 0.068964974 | 0.312454626 | 0.17 | 0.105 | 1 |
| Tmem80 | 0.069680298 | 0.250198663 | 0.15 | 0.089 | 1 |
| Tmed10 | 0.069826184 | -0.39391142 | 0.2 | 0.262 | 1 |
| Rgl2 | 0.070085794 | 0.25320802 | 0.115 | 0.063 | 1 |
| mt-Nd3 | 0.070085794 | -0.284660667 | 0.065 | 0.115 | 1 |
| Mob3b | 0.070241003 | 0.289549448 | 0.16 | 0.099 | 1 |
| Tcf20 | 0.070340539 | -0.303074817 | 0.375 | 0.435 | 1 |
| Spats2l | 0.070788847 | 0.303471461 | 0.175 | 0.11 | 1 |
| Sh3rf3 | 0.071335444 | 0.384809323 | 0.18 | 0.115 | 1 |
| Limch1 | 0.071446274 | 0.287175892 | 0.42 | 0.33 | 1 |
| Gtf2h5 | 0.071743036 | -0.302231896 | 0.07 | 0.12 | 1 |
| Gucy1a2 | 0.072321628 | -0.329293824 | 0.315 | 0.382 | 1 |
| Vps13d | 0.072340124 | -0.2931542 | 0.215 | 0.283 | 1 |
| Appl2 | 0.072346882 | 0.275259298 | 0.28 | 0.194 | 1 |
| Shprh | 0.07330072 | -0.3200084 | 0.19 | 0.257 | 1 |
| Elf2 | 0.073360942 | 0.34169119 | 0.265 | 0.194 | 1 |
| Irs1 | 0.073995103 | 0.287471838 | 0.16 | 0.099 | 1 |
| Mir9-3hg | 0.074257901 | 0.28386117 | 0.485 | 0.398 | 1 |
| D3Ertd751e | 0.074264917 | 0.312274551 | 0.27 | 0.194 | 1 |
| Snap25 | 0.074353323 | -0.281201932 | 0.585 | 0.628 | 1 |
| Nrbp2 | 0.074380043 | 0.331413264 | 0.325 | 0.241 | 1 |
| Dnah7b | 0.074511561 | 0.258223718 | 0.215 | 0.141 | 1 |
| Clip3 | 0.075285329 | 0.260424775 | 0.18 | 0.115 | 1 |
| Soat1 | 0.075876888 | -0.253545386 | 0.275 | 0.346 | 1 |
| Ptk2b | 0.075962905 | -0.299105728 | 0.095 | 0.152 | 1 |
| Dcaf7 | 0.076084123 | 0.281685504 | 0.17 | 0.105 | 1 |
| Grid1 | 0.076985038 | 0.282571625 | 0.58 | 0.482 | 1 |
| Spag9 | 0.077614657 | -0.258373357 | 0.74 | 0.785 | 1 |
| Vta1 | 0.078460918 | -0.348695947 | 0.095 | 0.152 | 1 |
| Ccdc85a | 0.078639377 | -0.420671337 | 0.31 | 0.372 | 1 |
| Caln1 | 0.078716075 | -0.301476134 | 0.21 | 0.283 | 1 |
| Gm10754 | 0.078912394 | -0.33791435 | 0.135 | 0.194 | 1 |
| Plxnb1 | 0.079149511 | 0.259798285 | 0.195 | 0.131 | 1 |
| Smg1 | 0.07960923 | -0.377673962 | 0.315 | 0.372 | 1 |
| Vcan | 0.079633853 | -0.361233052 | 0.145 | 0.209 | 1 |
| Gm26904 | 0.079933864 | -0.269472358 | 0.25 | 0.319 | 1 |
| Alk | 0.080122898 | 0.292083914 | 0.215 | 0.141 | 1 |
| Pphln1 | 0.080183421 | 0.267068177 | 0.12 | 0.068 | 1 |
| Ssbp3 | 0.080408394 | -0.319185903 | 0.3 | 0.361 | 1 |
| Ubc | 0.081189441 | -0.276745469 | 0.21 | 0.272 | 1 |
| Cdc27 | 0.081697285 | -0.316859725 | 0.13 | 0.188 | 1 |
| Erc1 | 0.082079365 | -0.36096929 | 0.415 | 0.471 | 1 |
| Ldb2 | 0.082304301 | 0.292921159 | 0.54 | 0.466 | 1 |
| AC162302.1 | 0.082872281 | -0.320148415 | 0.125 | 0.183 | 1 |
| Rprd2 | 0.083840342 | -0.278669067 | 0.27 | 0.335 | 1 |
| Ube2r2 | 0.084089216 | -0.41196369 | 0.255 | 0.314 | 1 |
| Sap130 | 0.084144821 | -0.364730981 | 0.18 | 0.241 | 1 |
| Pomp | 0.084212192 | -0.25672757 | 0.075 | 0.126 | 1 |
| Zranb3 | 0.084220219 | 0.442534809 | 0.15 | 0.094 | 1 |
| Ccdc12 | 0.084266803 | -0.276505601 | 0.08 | 0.131 | 1 |
| Zfp871 | 0.084865532 | -0.272484966 | 0.11 | 0.168 | 1 |
| Tmsb4x | 0.085164446 | -0.308188323 | 0.59 | 0.602 | 1 |
| Fis1 | 0.085178684 | -0.308088847 | 0.08 | 0.131 | 1 |
| Ywhaz | 0.085483126 | -0.323883944 | 0.475 | 0.513 | 1 |
| Prr16 | 0.085886843 | -0.398596788 | 0.355 | 0.414 | 1 |
| Nrgn | 0.086008182 | -0.400042333 | 0.25 | 0.309 | 1 |
| Ghitm | 0.086027408 | -0.352738813 | 0.135 | 0.194 | 1 |
| Camk4 | 0.086436558 | -0.267202655 | 0.265 | 0.319 | 1 |
| Galntl6 | 0.08655037 | 0.251464856 | 0.445 | 0.346 | 1 |
| Cdk5r1 | 0.087069184 | -0.359262041 | 0.2 | 0.262 | 1 |
| Ids | 0.087208699 | -0.291354957 | 0.105 | 0.162 | 1 |
| Zdhhc14 | 0.087370863 | -0.262190785 | 0.095 | 0.152 | 1 |
| Ccdc50 | 0.087462604 | -0.394641658 | 0.31 | 0.361 | 1 |
| Sntb1 | 0.087567917 | -0.334148458 | 0.265 | 0.319 | 1 |
| Dbpht2 | 0.088161042 | -0.305640174 | 0.06 | 0.105 | 1 |
| Btrc | 0.088162431 | 0.269942034 | 0.355 | 0.262 | 1 |
| Hikeshi | 0.088472481 | -0.27536736 | 0.075 | 0.126 | 1 |
| Man1c1 | 0.08859783 | 0.320279736 | 0.195 | 0.131 | 1 |
| Zbtb16 | 0.088769268 | -0.370280449 | 0.09 | 0.141 | 1 |
| Gli2 | 0.089338342 | 0.30917748 | 0.34 | 0.272 | 1 |
| C2cd2l | 0.089811352 | -0.338268502 | 0.105 | 0.157 | 1 |
| Hint1 | 0.09009793 | -0.261799845 | 0.145 | 0.209 | 1 |
| Map3k14 | 0.090100554 | 0.296930038 | 0.17 | 0.11 | 1 |
| 6530403H02Rik | 0.091158332 | -0.371840795 | 0.07 | 0.115 | 1 |
| Epb41l1 | 0.091728783 | -0.288280258 | 0.06 | 0.105 | 1 |
| Lin52 | 0.092216676 | -0.370903044 | 0.345 | 0.398 | 1 |
| U2surp | 0.092537193 | -0.359135018 | 0.26 | 0.325 | 1 |
| Fstl1 | 0.093157441 | -0.309791067 | 0.13 | 0.188 | 1 |
| Otud7b | 0.093206518 | -0.282699367 | 0.21 | 0.277 | 1 |
| Mgll | 0.09376398 | -0.439363062 | 0.395 | 0.435 | 1 |
| Fam171a1 | 0.094238696 | -0.320199549 | 0.175 | 0.241 | 1 |
| Ddn | 0.094273033 | -0.352513503 | 0.065 | 0.11 | 1 |
| Zmym4 | 0.095719727 | -0.313441723 | 0.46 | 0.513 | 1 |
| Poglut1 | 0.096089029 | -0.257901945 | 0.065 | 0.11 | 1 |
| Ppp2r2b | 0.096335012 | 0.272006716 | 0.865 | 0.806 | 1 |
| Prkca | 0.097272618 | 0.305939367 | 0.21 | 0.147 | 1 |
| Mdh1 | 0.0972831 | -0.297402094 | 0.275 | 0.346 | 1 |
| Ntsr2 | 0.097537383 | 0.254252126 | 0.305 | 0.23 | 1 |
| Hbs1l | 0.097989984 | 0.284951841 | 0.155 | 0.099 | 1 |
| Pcmt1 | 0.098104861 | -0.253681034 | 0.215 | 0.283 | 1 |
| Ncald | 0.098932909 | 0.295537782 | 0.155 | 0.099 | 1 |
| Pot1a | 0.099297681 | 0.278878888 | 0.115 | 0.068 | 1 |
| Gm26836 | 0.100141768 | -0.344596848 | 0.165 | 0.22 | 1 |
| Slc38a2 | 0.10036654 | -0.435857225 | 0.145 | 0.199 | 1 |
| Tcf7l1 | 0.100582693 | 0.288071052 | 0.435 | 0.361 | 1 |
| Gmfb | 0.100770679 | -0.278892251 | 0.07 | 0.115 | 1 |
| Reep1 | 0.100941817 | -0.284857322 | 0.065 | 0.11 | 1 |
| Ngly1 | 0.1009694 | -0.288942281 | 0.125 | 0.178 | 1 |
| Hdac4 | 0.100998046 | -0.292230578 | 0.285 | 0.351 | 1 |
| Emsy | 0.101663335 | -0.37972413 | 0.21 | 0.267 | 1 |
| Tbc1d23 | 0.101807003 | 0.276017123 | 0.215 | 0.152 | 1 |
| Snd1 | 0.101928368 | -0.306730905 | 0.225 | 0.277 | 1 |
| Sh3bgrl3 | 0.101943644 | -0.268792475 | 0.06 | 0.105 | 1 |
| Celf4 | 0.102170849 | -0.251111706 | 0.205 | 0.267 | 1 |
| Wwp1 | 0.102217039 | -0.262182071 | 0.235 | 0.293 | 1 |
| Slit2 | 0.102271579 | 0.391994659 | 0.41 | 0.325 | 1 |
| Atp13a3 | 0.10264838 | -0.302661886 | 0.105 | 0.157 | 1 |
| Arid1b | 0.104968112 | -0.298471967 | 0.535 | 0.56 | 1 |
| Got1 | 0.105944884 | -0.333908104 | 0.13 | 0.183 | 1 |
| Esf1 | 0.106359117 | -0.286463273 | 0.1 | 0.152 | 1 |
| Tiprl | 0.106362724 | -0.271006443 | 0.085 | 0.131 | 1 |
| Scaf11 | 0.106424501 | -0.267544629 | 0.21 | 0.277 | 1 |
| Sem1 | 0.106724037 | -0.299281982 | 0.085 | 0.131 | 1 |
| Fbxw7 | 0.106817559 | -0.306977017 | 0.175 | 0.23 | 1 |
| Camsap2 | 0.106995788 | -0.293296403 | 0.21 | 0.272 | 1 |
| Upp2 | 0.107256014 | 0.28495379 | 0.275 | 0.204 | 1 |
| Csrnp3 | 0.107595274 | -0.308748906 | 0.135 | 0.188 | 1 |
| Ypel2 | 0.107924149 | -0.303318398 | 0.11 | 0.162 | 1 |
| Nsg2 | 0.108023158 | -0.39406248 | 0.4 | 0.435 | 1 |
| Slc39a12 | 0.108131701 | 0.307907303 | 0.23 | 0.168 | 1 |
| Fgfr3 | 0.108480968 | 0.254377088 | 0.26 | 0.188 | 1 |
| Zfp644 | 0.108631623 | -0.312738805 | 0.33 | 0.366 | 1 |
| Ncstn | 0.10886433 | 0.310172922 | 0.12 | 0.073 | 1 |
| Rsf1 | 0.108947988 | -0.296424923 | 0.43 | 0.482 | 1 |
| Ttc23 | 0.109376754 | -0.281880016 | 0.19 | 0.246 | 1 |
| Ddx6 | 0.109946248 | -0.275113162 | 0.305 | 0.356 | 1 |
| Pcgf3 | 0.109977678 | -0.361744981 | 0.07 | 0.115 | 1 |
| Fzd3 | 0.111362826 | -0.332488693 | 0.2 | 0.262 | 1 |
| Ralgps2 | 0.111537381 | -0.403351868 | 0.325 | 0.377 | 1 |
| Dnaja1 | 0.111722693 | -0.364831619 | 0.125 | 0.173 | 1 |
| Lrrfip2 | 0.112502951 | -0.272769096 | 0.14 | 0.194 | 1 |
| Clptm1 | 0.112612104 | -0.397226512 | 0.115 | 0.162 | 1 |
| Pmepa1 | 0.113748965 | -0.288832995 | 0.095 | 0.141 | 1 |
| 4930578M01Rik | 0.114340877 | 0.279779467 | 0.15 | 0.099 | 1 |
| Pdzph1 | 0.114613437 | -0.260384643 | 0.19 | 0.251 | 1 |
| Prdm16 | 0.114940942 | 0.275350738 | 0.675 | 0.654 | 1 |
| Nmt2 | 0.115582641 | 0.260864777 | 0.23 | 0.162 | 1 |
| Setd3 | 0.115726405 | -0.26828109 | 0.235 | 0.293 | 1 |
| Arf1 | 0.115813751 | -0.262548185 | 0.155 | 0.215 | 1 |
| Jakmip2 | 0.116754422 | 0.280490965 | 0.235 | 0.173 | 1 |
| Maged1 | 0.117937887 | -0.356412262 | 0.18 | 0.236 | 1 |
| Rlim | 0.118230796 | -0.293995323 | 0.09 | 0.136 | 1 |
| Scamp2 | 0.119263213 | 0.267552402 | 0.105 | 0.063 | 1 |
| Fat1 | 0.119424357 | -0.293902247 | 0.105 | 0.157 | 1 |
| Gja1 | 0.120033636 | -0.254386108 | 0.42 | 0.466 | 1 |
| Cacna2d3 | 0.120169529 | 0.279380271 | 0.575 | 0.476 | 1 |
| Prdm10 | 0.121245906 | -0.311290235 | 0.095 | 0.141 | 1 |
| Arsk | 0.121304073 | 0.311488803 | 0.12 | 0.073 | 1 |
| Adam10 | 0.121705447 | -0.265336903 | 0.19 | 0.246 | 1 |
| Heca | 0.12192772 | 0.290085204 | 0.105 | 0.063 | 1 |
| Dennd6a | 0.121942667 | -0.340330374 | 0.225 | 0.272 | 1 |
| Zfp160 | 0.122403036 | -0.340192566 | 0.095 | 0.141 | 1 |
| Cfap54 | 0.122656342 | 0.316174504 | 0.28 | 0.215 | 1 |
| Myef2 | 0.122940902 | -0.25492697 | 0.165 | 0.22 | 1 |
| Dkk3 | 0.124495381 | 0.295306288 | 0.595 | 0.534 | 1 |
| Spag6.1 | 0.125079344 | -0.260077131 | 0.125 | 0.178 | 1 |
| Epb41l4b | 0.125163848 | -0.292256456 | 0.23 | 0.288 | 1 |
| Samd4 | 0.125481297 | 0.336927808 | 0.335 | 0.272 | 1 |
| Map2k6 | 0.125510614 | -0.292584273 | 0.31 | 0.356 | 1 |
| Fign | 0.125904653 | -0.365198252 | 0.145 | 0.194 | 1 |
| Rhoq | 0.126511891 | 0.27165916 | 0.18 | 0.126 | 1 |
| Wdr7 | 0.127525706 | -0.302212788 | 0.265 | 0.314 | 1 |
| Unc13c | 0.127578549 | -0.40886329 | 0.13 | 0.178 | 1 |
| Zfp251 | 0.127860232 | -0.295458398 | 0.065 | 0.105 | 1 |
| Rad23b | 0.128805835 | -0.285425555 | 0.125 | 0.173 | 1 |
| Ccser1 | 0.129014896 | 0.269868739 | 0.515 | 0.466 | 1 |
| Fam189a2 | 0.129260745 | 0.259998338 | 0.105 | 0.063 | 1 |
| Wbp1l | 0.129451687 | -0.250694352 | 0.1 | 0.147 | 1 |
| Kpna4 | 0.130099166 | -0.37598005 | 0.285 | 0.351 | 1 |
| Clta | 0.130412128 | -0.302109817 | 0.14 | 0.188 | 1 |
| Mpp7 | 0.13091668 | 0.279374296 | 0.15 | 0.099 | 1 |
| Rgs2 | 0.132097316 | -0.268412416 | 0.065 | 0.105 | 1 |
| Rchy1 | 0.132491521 | 0.264389756 | 0.175 | 0.12 | 1 |
| Pcmtd1 | 0.133322975 | -0.275574028 | 0.365 | 0.414 | 1 |
| G3bp1 | 0.133809438 | -0.270351437 | 0.115 | 0.162 | 1 |
| Ints7 | 0.134678385 | -0.300418048 | 0.07 | 0.11 | 1 |
| Stam2 | 0.13511716 | -0.262794605 | 0.105 | 0.152 | 1 |
| Pcbp2 | 0.135403889 | -0.307182109 | 0.335 | 0.393 | 1 |
| Camk2b | 0.136002967 | -0.314974379 | 0.295 | 0.346 | 1 |
| Per2 | 0.136110361 | -0.260368032 | 0.165 | 0.22 | 1 |
| Tle4 | 0.136199401 | -0.260013319 | 0.435 | 0.471 | 1 |
| Micu3 | 0.138261733 | -0.332644539 | 0.275 | 0.325 | 1 |
| Maob | 0.139322846 | -0.287632537 | 0.145 | 0.194 | 1 |
| Zfp771 | 0.139792532 | -0.29545248 | 0.095 | 0.136 | 1 |
| Scamp5 | 0.139826488 | 0.280939853 | 0.165 | 0.115 | 1 |
| Ap1ar | 0.140095423 | -0.260148435 | 0.1 | 0.147 | 1 |
| Usp47 | 0.141158623 | -0.28423349 | 0.365 | 0.403 | 1 |
| Rnf180 | 0.141269741 | -0.300700012 | 0.395 | 0.435 | 1 |
| Fntb | 0.142461327 | -0.275284967 | 0.075 | 0.115 | 1 |
| Brk1 | 0.143078794 | -0.296651317 | 0.15 | 0.199 | 1 |
| Pgm2l1 | 0.143734473 | -0.381590346 | 0.095 | 0.136 | 1 |
| Sall2 | 0.144875799 | -0.286998841 | 0.075 | 0.115 | 1 |
| Ccny | 0.146509472 | -0.30555597 | 0.25 | 0.304 | 1 |
| Scai | 0.146922205 | -0.253692462 | 0.28 | 0.34 | 1 |
| Large1 | 0.147946685 | -0.284253516 | 0.425 | 0.461 | 1 |
| Cyfip1 | 0.148097228 | -0.314070519 | 0.19 | 0.241 | 1 |
| Gm43713 | 0.148150183 | -0.310933276 | 0.19 | 0.236 | 1 |
| Aff1 | 0.150243031 | -0.291481434 | 0.34 | 0.393 | 1 |
| Atp6ap2 | 0.15033226 | -0.28330415 | 0.185 | 0.23 | 1 |
| Fam126b | 0.150728104 | -0.282038767 | 0.215 | 0.257 | 1 |
| Gls | 0.151414098 | -0.270706156 | 0.35 | 0.408 | 1 |
| Hif3a | 0.153315556 | -0.276979569 | 0.31 | 0.356 | 1 |
| Nbeal1 | 0.153547015 | 0.265386855 | 0.41 | 0.33 | 1 |
| Homer1 | 0.153552094 | -0.279140278 | 0.24 | 0.293 | 1 |
| Ostm1 | 0.153819185 | 0.261003129 | 0.335 | 0.257 | 1 |
| Ptpn13 | 0.155107924 | 0.279044897 | 0.405 | 0.351 | 1 |
| Stxbp5 | 0.155847268 | 0.261476652 | 0.24 | 0.183 | 1 |
| Atp9b | 0.157055683 | -0.3079746 | 0.36 | 0.398 | 1 |
| Usp54 | 0.157632391 | -0.374115639 | 0.25 | 0.288 | 1 |
| Gm4876 | 0.157669609 | 0.277138974 | 0.135 | 0.089 | 1 |
| Rgs6 | 0.158752107 | 0.311902248 | 0.595 | 0.529 | 1 |
| AY036118 | 0.160045706 | -0.278122042 | 0.345 | 0.366 | 1 |
| Gmps | 0.161323037 | -0.281661489 | 0.095 | 0.136 | 1 |
| Hnrnpll | 0.161740635 | 0.257478532 | 0.27 | 0.209 | 1 |
| Rit1.1 | 0.162916659 | -0.27402836 | 0.29 | 0.335 | 1 |
| Galnt18 | 0.163299679 | -0.260233802 | 0.24 | 0.304 | 1 |
| Snrk | 0.164156856 | -0.272372154 | 0.11 | 0.152 | 1 |
| Xpo7 | 0.164388293 | -0.265990275 | 0.295 | 0.351 | 1 |
| Slc25a4 | 0.16496559 | -0.315380867 | 0.23 | 0.272 | 1 |
| Bcan | 0.166742911 | 0.256839775 | 0.4 | 0.319 | 1 |
| Notch3 | 0.167437308 | 0.256178918 | 0.125 | 0.084 | 1 |
| Golga4 | 0.167798836 | -0.266465646 | 0.185 | 0.236 | 1 |
| Rad21 | 0.168862706 | -0.276504282 | 0.105 | 0.147 | 1 |
| Ftl1 | 0.170131845 | -0.256778841 | 0.1 | 0.141 | 1 |
| Cand1 | 0.170798775 | -0.263828211 | 0.105 | 0.147 | 1 |
| Rab14 | 0.1709449 | -0.286257337 | 0.305 | 0.335 | 1 |
| Zfp808 | 0.171619965 | -0.292359571 | 0.085 | 0.126 | 1 |
| Astn2 | 0.171631375 | -0.311252096 | 0.27 | 0.319 | 1 |
| Cldn34c1 | 0.17425512 | 0.265691629 | 0.17 | 0.12 | 1 |
| Dst | 0.174502547 | 0.252394905 | 0.56 | 0.503 | 1 |
| Osbp | 0.175104168 | -0.35356791 | 0.08 | 0.115 | 1 |
| Ndufa12 | 0.175804494 | -0.304804956 | 0.095 | 0.136 | 1 |
| Khsrp | 0.176385379 | -0.279468487 | 0.1 | 0.141 | 1 |
| Zfyve9 | 0.176463388 | -0.315655012 | 0.29 | 0.335 | 1 |
| Pcdh7 | 0.176845874 | 0.301692006 | 0.54 | 0.482 | 1 |
| Dhx36 | 0.177628391 | -0.252346147 | 0.21 | 0.251 | 1 |
| Zfp346 | 0.178039882 | -0.2580424 | 0.085 | 0.126 | 1 |
| Jmy | 0.179673367 | -0.257902291 | 0.16 | 0.204 | 1 |
| Baiap2 | 0.180062753 | -0.269504781 | 0.26 | 0.304 | 1 |
| Smarcad1 | 0.180376898 | -0.322967078 | 0.21 | 0.251 | 1 |
| Tnc | 0.181038725 | 0.31284179 | 0.13 | 0.089 | 1 |
| Morf4l1 | 0.181266051 | 0.271478722 | 0.21 | 0.157 | 1 |
| Ccar1 | 0.182745554 | -0.259133146 | 0.295 | 0.335 | 1 |
| Rplp1 | 0.186947446 | -0.25679907 | 0.155 | 0.199 | 1 |
| Sft2d1 | 0.187033191 | 0.28761194 | 0.115 | 0.079 | 1 |
| Mpp1 | 0.187529715 | -0.287643207 | 0.07 | 0.105 | 1 |
| Klhl2 | 0.188733103 | -0.283237038 | 0.165 | 0.209 | 1 |
| Thrap3 | 0.189060295 | -0.270602366 | 0.26 | 0.293 | 1 |
| Kdm2a | 0.190731064 | -0.3137995 | 0.415 | 0.435 | 1 |
| Kif2a | 0.191224986 | -0.305040114 | 0.15 | 0.194 | 1 |
| Eno1 | 0.191987997 | -0.293450761 | 0.085 | 0.12 | 1 |
| Atp2c1 | 0.194384498 | -0.289141584 | 0.22 | 0.262 | 1 |
| Megf9 | 0.19563574 | -0.262295644 | 0.205 | 0.246 | 1 |
| Btbd3 | 0.196721889 | 0.38059907 | 0.14 | 0.099 | 1 |
| Kctd1 | 0.196871167 | -0.315582414 | 0.16 | 0.209 | 1 |
| Lrmda | 0.197499438 | -0.261026281 | 0.105 | 0.147 | 1 |
| Csnk1d | 0.200184733 | -0.273797769 | 0.115 | 0.152 | 1 |
| Ngef | 0.20166104 | -0.33702148 | 0.22 | 0.251 | 1 |
| 2310022B05Rik | 0.202855267 | 0.265028562 | 0.11 | 0.073 | 1 |
| Riok1 | 0.203238733 | -0.261587948 | 0.08 | 0.115 | 1 |
| Srcin1 | 0.203281661 | -0.348900662 | 0.15 | 0.183 | 1 |
| Slc25a3 | 0.206658698 | -0.284951015 | 0.255 | 0.298 | 1 |
| Tmtc1 | 0.207786496 | 0.257605333 | 0.15 | 0.11 | 1 |
| Gm26827 | 0.209447336 | -0.300491081 | 0.11 | 0.147 | 1 |
| Lrba | 0.210457685 | -0.262049831 | 0.505 | 0.513 | 1 |
| Scg2 | 0.211830037 | -0.273288001 | 0.21 | 0.251 | 1 |
| Ptpn9 | 0.212146442 | 0.264273019 | 0.2 | 0.157 | 1 |
| Pnpt1 | 0.213962327 | -0.290473052 | 0.11 | 0.147 | 1 |
| Fam168a | 0.217650461 | -0.251807882 | 0.42 | 0.429 | 1 |
| Rock2 | 0.217798741 | -0.272073686 | 0.27 | 0.304 | 1 |
| Map2k4 | 0.218616242 | -0.310466714 | 0.25 | 0.283 | 1 |
| Srr | 0.221289867 | -0.309055609 | 0.155 | 0.188 | 1 |
| Uqcrc2 | 0.22290789 | -0.253196556 | 0.115 | 0.152 | 1 |
| Paqr8 | 0.228591613 | -0.312370106 | 0.24 | 0.283 | 1 |
| Rab8b | 0.232350117 | -0.383951187 | 0.08 | 0.11 | 1 |
| Mid1 | 0.238121961 | -0.296470847 | 0.54 | 0.545 | 1 |
| Rabgap1l | 0.238264004 | -0.323718583 | 0.545 | 0.534 | 1 |
| Phrf1 | 0.23902594 | -0.278420995 | 0.11 | 0.141 | 1 |
| Akap11 | 0.239793213 | -0.251650429 | 0.295 | 0.314 | 1 |
| Stmn4 | 0.245895836 | -0.27234922 | 0.095 | 0.126 | 1 |
| Rasd2 | 0.245929894 | -0.252989062 | 0.13 | 0.162 | 1 |
| Gda | 0.246617738 | -0.368204622 | 0.105 | 0.136 | 1 |
| Arl8b | 0.248671221 | 0.252933273 | 0.17 | 0.131 | 1 |
| Dnajc19 | 0.253181472 | -0.305767591 | 0.155 | 0.188 | 1 |
| Dock10 | 0.256422804 | -0.268046499 | 0.1 | 0.131 | 1 |
| Rlf | 0.256881295 | -0.26646561 | 0.24 | 0.272 | 1 |
| Plcl2 | 0.258928041 | -0.432761515 | 0.19 | 0.215 | 1 |
| Arl4a | 0.261192089 | -0.262024541 | 0.1 | 0.131 | 1 |
| Lrrtm3 | 0.262064023 | -0.255207786 | 0.155 | 0.194 | 1 |
| Atp9a | 0.265539205 | -0.265299062 | 0.155 | 0.194 | 1 |
| Hace1 | 0.269512107 | -0.267951017 | 0.195 | 0.236 | 1 |
| Rsrc2 | 0.274782675 | -0.260235388 | 0.315 | 0.335 | 1 |
| Ube2w | 0.275436332 | -0.301392108 | 0.22 | 0.257 | 1 |
| Hist1h2be | 0.275508112 | -0.270456221 | 0.175 | 0.209 | 1 |
| Fam120a | 0.2760476 | -0.334658538 | 0.22 | 0.246 | 1 |
| Tomm70a | 0.276114382 | -0.272663438 | 0.19 | 0.22 | 1 |
| Akap5 | 0.276578738 | -0.252711557 | 0.1 | 0.131 | 1 |
| Cox7b | 0.277025604 | -0.257693071 | 0.12 | 0.152 | 1 |
| Afg1l | 0.279882652 | 0.264895137 | 0.26 | 0.209 | 1 |
| Usp48 | 0.280111955 | -0.274643332 | 0.165 | 0.199 | 1 |
| Ulk2 | 0.281894373 | -0.40979919 | 0.29 | 0.309 | 1 |
| Azi2 | 0.290513706 | -0.26724546 | 0.115 | 0.147 | 1 |
| Lmtk2 | 0.290914163 | -0.261750286 | 0.17 | 0.199 | 1 |
| Tmem132b | 0.292141103 | -0.357223655 | 0.385 | 0.403 | 1 |
| Cnep1r1 | 0.29259878 | -0.276688154 | 0.145 | 0.173 | 1 |
| Aplp2 | 0.293961433 | -0.256044206 | 0.405 | 0.414 | 1 |
| Adamts18 | 0.296104158 | -0.271910281 | 0.475 | 0.508 | 1 |
| Zhx3 | 0.296419177 | -0.308593094 | 0.445 | 0.461 | 1 |
| Slf1 | 0.299774876 | -0.36220553 | 0.17 | 0.199 | 1 |
| Htra1 | 0.301010668 | -0.303868523 | 0.22 | 0.257 | 1 |
| Mgat4c | 0.301703658 | -0.279162843 | 0.335 | 0.356 | 1 |
| D030047H15Rik | 0.302208439 | -0.272293498 | 0.15 | 0.178 | 1 |
| Dmxl1 | 0.302931483 | -0.259931611 | 0.47 | 0.497 | 1 |
| Map2k5 | 0.30680588 | -0.272156719 | 0.265 | 0.288 | 1 |
| Ntan1 | 0.308118518 | -0.255245766 | 0.135 | 0.168 | 1 |
| Ubl3 | 0.308507833 | -0.295932535 | 0.26 | 0.277 | 1 |
| Usp45 | 0.30960918 | -0.283407947 | 0.17 | 0.204 | 1 |
| Rfc1 | 0.313166087 | -0.268273995 | 0.13 | 0.162 | 1 |
| Usp33 | 0.316699063 | -0.274177771 | 0.245 | 0.267 | 1 |
| Mapk8 | 0.317825828 | -0.250370905 | 0.145 | 0.173 | 1 |
| Camk2n1 | 0.318038213 | -0.278091134 | 0.255 | 0.293 | 1 |
| Mindy2 | 0.319324327 | -0.302981144 | 0.12 | 0.147 | 1 |
| Napg | 0.328066496 | -0.282280034 | 0.085 | 0.11 | 1 |
| Snx27 | 0.331338611 | -0.264108205 | 0.23 | 0.257 | 1 |
| Gm48512 | 0.333261716 | -0.325870583 | 0.085 | 0.11 | 1 |
| BC030336 | 0.335177726 | -0.292619666 | 0.145 | 0.173 | 1 |
| Klhl13 | 0.336811707 | -0.266237556 | 0.105 | 0.136 | 1 |
| Phf6 | 0.343504822 | -0.258683794 | 0.09 | 0.115 | 1 |
| Gabrb2 | 0.350261406 | -0.288981686 | 0.1 | 0.126 | 1 |
| Otud4 | 0.358873402 | -0.265952165 | 0.165 | 0.194 | 1 |
| Mpped2 | 0.358945283 | -0.2570005 | 0.235 | 0.262 | 1 |
| Vapa | 0.363148378 | -0.262691126 | 0.27 | 0.288 | 1 |
| Mettl11b | 0.37046188 | -0.260387384 | 0.115 | 0.141 | 1 |
| Tmem57 | 0.375524233 | -0.315107769 | 0.225 | 0.251 | 1 |
| Sorbs2 | 0.385732268 | -0.291302606 | 0.28 | 0.298 | 1 |
| Lgr4 | 0.386059342 | -0.27599587 | 0.25 | 0.267 | 1 |
| Tm9sf3 | 0.392932416 | -0.257492736 | 0.205 | 0.225 | 1 |
| Scg3 | 0.395513515 | -0.2789685 | 0.34 | 0.351 | 1 |
| Rc3h2 | 0.396458971 | -0.304094747 | 0.255 | 0.283 | 1 |
| 1110019D14Rik | 0.400618665 | -0.280428738 | 0.195 | 0.22 | 1 |
| Slc7a11 | 0.401547271 | 0.258595831 | 0.23 | 0.194 | 1 |
| Egfem1 | 0.432136099 | -0.279073008 | 0.195 | 0.215 | 1 |
| Gm29260 | 0.445369889 | -0.630018926 | 0.11 | 0.131 | 1 |
| Lrp6 | 0.453164257 | -0.277192691 | 0.28 | 0.283 | 1 |
| Gm14326 | 0.473283025 | -0.256829313 | 0.135 | 0.152 | 1 |
| Gm47271 | 0.484395294 | -0.283055977 | 0.13 | 0.147 | 1 |
| Ireb2 | 0.489044376 | -0.276236886 | 0.17 | 0.183 | 1 |
| Trim24 | 0.494702264 | -0.250977661 | 0.18 | 0.194 | 1 |
| Gm11713 | 0.494721671 | -0.260827023 | 0.105 | 0.12 | 1 |
| Strn | 0.514246985 | -0.260034043 | 0.26 | 0.272 | 1 |
| Mpp6 | 0.526937556 | -0.251016066 | 0.165 | 0.178 | 1 |
| Ccnd3 | 0.53021105 | -0.297403604 | 0.41 | 0.393 | 1 |
| Grb14 | 0.540379289 | -0.253299902 | 0.09 | 0.105 | 1 |
| Akap13 | 0.577052369 | -0.253612886 | 0.325 | 0.319 | 1 |
| Lmbr1 | 0.599946649 | -0.263182648 | 0.155 | 0.168 | 1 |
| Nnat | 0.660969283 | -0.250442594 | 0.275 | 0.288 | 1 |
| Hgf | 0.705644619 | -0.250532915 | 0.11 | 0.115 | 1 |

| **Supplemental Table S6. Differentially expressed genes in each NSC & astrocyte sub-type generated comparing the control and the mTBI SVZ, related to Figure 4. (Astrocytes DEGs)** | | | | | |
| --- | --- | --- | --- | --- | --- |
| Column1 | p_val | avg_log2FC | pct.1 | pct.2 | p_val_adj |
| Gm42418 | 9.00771E-52 | 0.690928817 | 1 | 1 | 2.04592E-47 |
| Wdr17 | 7.16119E-31 | -0.690090288 | 0.929 | 0.981 | 1.62652E-26 |
| Malat1 | 2.40267E-26 | 0.285222402 | 1 | 1 | 5.45719E-22 |
| Plp1 | 1.77144E-21 | 0.764619608 | 0.901 | 0.702 | 4.02346E-17 |
| Fgfr2 | 3.89109E-18 | -0.542821574 | 0.896 | 0.935 | 8.83784E-14 |
| Kcnip4 | 2.93291E-13 | 0.604918986 | 0.87 | 0.746 | 6.66152E-09 |
| Mertk | 8.10948E-11 | -0.386900079 | 0.901 | 0.952 | 1.84191E-06 |
| Gm12239 | 8.27854E-10 | 0.480179749 | 0.847 | 0.726 | 1.8803E-05 |
| Htra1 | 9.70482E-10 | -0.502076845 | 0.606 | 0.763 | 2.20426E-05 |
| Gpm6a | 2.88657E-09 | -0.347909339 | 0.884 | 0.944 | 6.55627E-05 |
| Gria2 | 1.42756E-08 | -0.363726102 | 0.917 | 0.959 | 0.000324241 |
| Calm2 | 1.72146E-08 | -0.422034247 | 0.599 | 0.724 | 0.000390995 |
| Mgll | 2.23567E-08 | -0.650457758 | 0.439 | 0.615 | 0.000507787 |
| Luzp2 | 2.98024E-08 | -0.516260926 | 0.894 | 0.939 | 0.000676901 |
| Agbl4 | 1.09654E-07 | 0.607877116 | 0.436 | 0.259 | 0.002490563 |
| Meg3 | 1.59318E-07 | 0.3399029 | 0.908 | 0.843 | 0.003618599 |
| Sorbs1 | 1.73223E-07 | 0.406996529 | 0.811 | 0.673 | 0.003934424 |
| Pbxip1 | 1.98042E-07 | 0.491549742 | 0.356 | 0.201 | 0.004498131 |
| Nebl | 2.71204E-07 | 0.493441975 | 0.696 | 0.528 | 0.006159851 |
| Kcnc2 | 4.12368E-07 | 0.4827151 | 0.134 | 0.036 | 0.009366111 |
| Ctnna2 | 4.74852E-07 | 0.384005182 | 0.915 | 0.809 | 0.010785315 |
| Tac1 | 5.37545E-07 | -0.457946829 | 0.231 | 0.385 | 0.012209266 |
| Hs6st3 | 1.0544E-06 | 0.490297584 | 0.337 | 0.194 | 0.023948568 |
| Egfem1 | 1.17677E-06 | 0.597939939 | 0.45 | 0.3 | 0.026727938 |
| Kcnq3 | 1.3269E-06 | 0.625785529 | 0.571 | 0.438 | 0.030137977 |
| Rgs6 | 1.8692E-06 | 0.356307915 | 0.83 | 0.719 | 0.042455096 |
| Igf1r | 2.06627E-06 | 0.470878138 | 0.62 | 0.475 | 0.046931085 |
| Gpr88 | 2.82204E-06 | -0.402439868 | 0.422 | 0.574 | 0.064097076 |
| Ntng1 | 3.78257E-06 | 0.401572049 | 0.127 | 0.039 | 0.08591353 |
| Cmss1 | 5.6224E-06 | 0.303117215 | 0.908 | 0.821 | 0.127701559 |
| Calm1 | 5.78228E-06 | -0.431298232 | 0.427 | 0.574 | 0.131332935 |
| Zbtb7c | 8.95396E-06 | 0.45572863 | 0.226 | 0.111 | 0.20337119 |
| Ubb | 9.42005E-06 | -0.402546743 | 0.521 | 0.622 | 0.213957634 |
| A830082K12Rik | 9.61323E-06 | 0.466056645 | 0.288 | 0.16 | 0.21834538 |
| Gm48747 | 1.02445E-05 | -0.446674836 | 0.524 | 0.637 | 0.232682964 |
| Sp3os | 1.18049E-05 | 0.292924907 | 0.106 | 0.029 | 0.268123561 |
| Ppp3ca | 1.19868E-05 | -0.261356981 | 0.932 | 0.966 | 0.272257148 |
| Ntrk2 | 1.27129E-05 | -0.317596143 | 0.854 | 0.898 | 0.288747337 |
| Snhg11 | 2.64103E-05 | 0.346868645 | 0.719 | 0.625 | 0.599857901 |
| Rnf14 | 3.08633E-05 | -0.418479808 | 0.134 | 0.242 | 0.700998654 |
| Ldlr | 3.10645E-05 | 0.329475062 | 0.226 | 0.119 | 0.705567096 |
| Enah | 3.62196E-05 | -0.331195785 | 0.762 | 0.821 | 0.822656763 |
| Cntn5 | 4.10408E-05 | 0.405645911 | 0.538 | 0.414 | 0.932159721 |
| Map3k12 | 4.20158E-05 | 0.364062546 | 0.149 | 0.063 | 0.954305578 |
| Lingo2 | 4.22202E-05 | 0.410271153 | 0.505 | 0.37 | 0.958946637 |
| Aldh1a1 | 4.6402E-05 | 0.541166636 | 0.196 | 0.099 | 1 |
| Efna5 | 5.19428E-05 | -0.615622812 | 0.198 | 0.31 | 1 |
| Ndrg2 | 5.65764E-05 | 0.376400784 | 0.599 | 0.487 | 1 |
| Mapt | 5.68489E-05 | 0.349127769 | 0.561 | 0.436 | 1 |
| Nsg2 | 6.33746E-05 | -0.459355126 | 0.389 | 0.492 | 1 |
| Zfp804b | 6.9404E-05 | 0.308042992 | 0.127 | 0.048 | 1 |
| Tmeff2 | 7.17885E-05 | 0.36261523 | 0.285 | 0.172 | 1 |
| Setbp1 | 8.63289E-05 | -0.398077675 | 0.594 | 0.671 | 1 |
| Kcnk10 | 8.81965E-05 | 0.386791734 | 0.25 | 0.143 | 1 |
| Gm21954 | 0.000101813 | -0.344620817 | 0.179 | 0.293 | 1 |
| AC149090.1 | 0.000102701 | 0.384091105 | 0.21 | 0.114 | 1 |
| Samd4 | 0.000113402 | 0.39022036 | 0.316 | 0.203 | 1 |
| Erc1 | 0.000115995 | -0.361139302 | 0.448 | 0.547 | 1 |
| St3gal4 | 0.000117549 | -0.307108711 | 0.842 | 0.864 | 1 |
| Srgap1 | 0.00015069 | 0.463337301 | 0.318 | 0.206 | 1 |
| Cdh2 | 0.000151508 | -0.270247655 | 0.726 | 0.823 | 1 |
| Nr3c2 | 0.000152461 | 0.294422481 | 0.8 | 0.705 | 1 |
| P4ha1 | 0.000154035 | -0.382708622 | 0.184 | 0.291 | 1 |
| Fry | 0.000159842 | 0.518107464 | 0.408 | 0.291 | 1 |
| Pum1 | 0.000162256 | -0.366288858 | 0.337 | 0.446 | 1 |
| Mir670hg | 0.000175694 | 0.42579555 | 0.21 | 0.116 | 1 |
| Atf7ip | 0.000182751 | 0.35676174 | 0.434 | 0.31 | 1 |
| Camk1d | 0.000183026 | 0.352334545 | 0.71 | 0.608 | 1 |
| Sox11 | 0.000206161 | -0.373801971 | 0.09 | 0.172 | 1 |
| Aldh1l1 | 0.000208947 | 0.399137384 | 0.392 | 0.276 | 1 |
| Acss1 | 0.000239734 | 0.253842345 | 0.658 | 0.535 | 1 |
| Mbp | 0.000244271 | 0.319371328 | 0.285 | 0.174 | 1 |
| Gm26804 | 0.000245841 | -0.317677108 | 0.575 | 0.671 | 1 |
| Nhsl1 | 0.000250259 | -0.250921139 | 0.696 | 0.758 | 1 |
| Homer1 | 0.000269399 | -0.338235343 | 0.252 | 0.363 | 1 |
| Gm973 | 0.000282517 | 0.31692372 | 0.712 | 0.598 | 1 |
| Nrbp2 | 0.000303149 | 0.37129067 | 0.316 | 0.213 | 1 |
| Cldn11 | 0.000322335 | 0.322495726 | 0.229 | 0.133 | 1 |
| Cpeb4 | 0.00035033 | -0.293677797 | 0.722 | 0.792 | 1 |
| Marcks | 0.000364399 | -0.337505239 | 0.144 | 0.237 | 1 |
| Txndc5 | 0.00036484 | 0.280227702 | 0.12 | 0.051 | 1 |
| 9530026P05Rik | 0.000379926 | 0.531469138 | 0.295 | 0.194 | 1 |
| Gm35188 | 0.000385821 | -0.320320176 | 0.642 | 0.717 | 1 |
| Anks1 | 0.00039602 | 0.388297018 | 0.278 | 0.184 | 1 |
| Son | 0.000398043 | 0.256958599 | 0.844 | 0.775 | 1 |
| Prpf38a | 0.000413943 | -0.281874624 | 0.047 | 0.111 | 1 |
| Sobp | 0.000450327 | 0.430614114 | 0.281 | 0.182 | 1 |
| Ablim1 | 0.000453404 | 0.358287105 | 0.483 | 0.366 | 1 |
| Fus | 0.000471216 | -0.313487358 | 0.417 | 0.523 | 1 |
| Glt8d1 | 0.000515331 | 0.369332269 | 0.248 | 0.155 | 1 |
| Suclg1 | 0.000526929 | -0.36668396 | 0.203 | 0.298 | 1 |
| Nsg1 | 0.000576906 | -0.330950693 | 0.2 | 0.303 | 1 |
| Atg7 | 0.000580504 | 0.33892408 | 0.191 | 0.107 | 1 |
| Hmgcs2 | 0.000599423 | 0.304463774 | 0.134 | 0.063 | 1 |
| Lrp1b | 0.000679301 | 0.268728326 | 0.781 | 0.697 | 1 |
| Tnrc6a | 0.00069056 | -0.253556499 | 0.262 | 0.38 | 1 |
| Tle4 | 0.000692463 | -0.35149746 | 0.526 | 0.622 | 1 |
| Lrrc58 | 0.000692787 | -0.433683785 | 0.314 | 0.397 | 1 |
| Skap2 | 0.000696686 | 0.321977237 | 0.212 | 0.123 | 1 |
| Ube3a | 0.000728191 | -0.361978859 | 0.425 | 0.53 | 1 |
| 4930445B16Rik | 0.000733331 | 0.256901496 | 0.106 | 0.044 | 1 |
| Arf1 | 0.000735679 | -0.342970239 | 0.134 | 0.228 | 1 |
| Ccdc82 | 0.000772614 | 0.33333699 | 0.16 | 0.085 | 1 |
| Matr3 | 0.00077813 | -0.388406562 | 0.288 | 0.383 | 1 |
| A830019P07Rik | 0.000787311 | 0.314672351 | 0.25 | 0.155 | 1 |
| Bdh1 | 0.000799089 | 0.296303313 | 0.165 | 0.087 | 1 |
| Arpp19 | 0.000814291 | -0.268322663 | 0.243 | 0.344 | 1 |
| Akap8l | 0.00083018 | 0.366547237 | 0.486 | 0.368 | 1 |
| Ep400 | 0.000867635 | -0.342719735 | 0.243 | 0.334 | 1 |
| Rpe65 | 0.000898912 | 0.36420658 | 0.198 | 0.114 | 1 |
| Inpp4b | 0.000963098 | 0.260020686 | 0.189 | 0.104 | 1 |
| Map2k5 | 0.000993323 | -0.368630025 | 0.255 | 0.346 | 1 |
| Ndufa4 | 0.00099954 | -0.318121756 | 0.132 | 0.215 | 1 |
| Gclc | 0.001014907 | -0.374981396 | 0.13 | 0.211 | 1 |
| Dopey2 | 0.001036959 | 0.278779787 | 0.325 | 0.23 | 1 |
| Cnp | 0.001046613 | 0.332204758 | 0.146 | 0.075 | 1 |
| Scand1 | 0.001082791 | -0.2545906 | 0.057 | 0.121 | 1 |
| Rab11fip2 | 0.001154209 | 0.330822918 | 0.351 | 0.257 | 1 |
| Pnpla7 | 0.001166609 | 0.309204325 | 0.606 | 0.499 | 1 |
| Foxo1 | 0.001235263 | -0.31365324 | 0.469 | 0.559 | 1 |
| Lgi4 | 0.001307659 | 0.362093789 | 0.307 | 0.218 | 1 |
| AC134414.1 | 0.001346332 | -0.39202133 | 0.229 | 0.32 | 1 |
| Kcnh5 | 0.001378768 | -0.286002712 | 0.064 | 0.128 | 1 |
| Igfbp5 | 0.00142069 | 0.324700866 | 0.217 | 0.131 | 1 |
| Gng7 | 0.001487967 | -0.288419338 | 0.13 | 0.211 | 1 |
| Aven | 0.001626447 | -0.312908371 | 0.047 | 0.104 | 1 |
| Grip1 | 0.001645264 | -0.423898354 | 0.483 | 0.562 | 1 |
| Ammecr1 | 0.001654925 | -0.325660426 | 0.179 | 0.264 | 1 |
| Tprkb | 0.001755194 | 0.4003848 | 0.524 | 0.438 | 1 |
| Gm12394 | 0.001831711 | -0.392973709 | 0.198 | 0.281 | 1 |
| Galnt18 | 0.00189798 | -0.361744683 | 0.439 | 0.508 | 1 |
| Arf3 | 0.001991084 | -0.36999686 | 0.269 | 0.363 | 1 |
| Nfat5 | 0.002005711 | 0.251398485 | 0.726 | 0.625 | 1 |
| Mta3 | 0.002016038 | 0.28830837 | 0.196 | 0.119 | 1 |
| Klf9 | 0.002163706 | -0.298910609 | 0.361 | 0.467 | 1 |
| Fam196a | 0.002183923 | -0.333499368 | 0.167 | 0.252 | 1 |
| Atp1b2 | 0.002224272 | 0.321471155 | 0.368 | 0.271 | 1 |
| Gm26836 | 0.002231612 | -0.341407741 | 0.156 | 0.235 | 1 |
| Pik3r1 | 0.002238102 | -0.257117169 | 0.441 | 0.542 | 1 |
| Efnb2 | 0.002344018 | -0.302275495 | 0.099 | 0.169 | 1 |
| Arpp21 | 0.002359812 | -0.320957814 | 0.413 | 0.487 | 1 |
| Scd2 | 0.002438375 | 0.324101099 | 0.566 | 0.472 | 1 |
| Gm45846 | 0.002460088 | 0.314209878 | 0.29 | 0.196 | 1 |
| Nipa2 | 0.002467777 | -0.270345448 | 0.094 | 0.167 | 1 |
| Mettl25 | 0.002555121 | 0.271221397 | 0.17 | 0.099 | 1 |
| P2ry14 | 0.002635407 | -0.287068279 | 0.163 | 0.249 | 1 |
| Ntsr2 | 0.002652731 | 0.29314437 | 0.505 | 0.407 | 1 |
| Grin1 | 0.002738984 | 0.25400441 | 0.215 | 0.133 | 1 |
| Vezt | 0.002820537 | 0.353326853 | 0.328 | 0.247 | 1 |
| Slc35e2 | 0.002875031 | 0.290719247 | 0.134 | 0.073 | 1 |
| Ezh1 | 0.002889886 | 0.294867905 | 0.163 | 0.094 | 1 |
| Shisa4 | 0.002891129 | 0.260848601 | 0.316 | 0.228 | 1 |
| Ggact | 0.002907899 | -0.327218988 | 0.175 | 0.254 | 1 |
| Pamr1 | 0.003023091 | 0.312109733 | 0.146 | 0.082 | 1 |
| Apc2 | 0.003076336 | 0.264214374 | 0.156 | 0.09 | 1 |
| Oxr1 | 0.00308777 | -0.270221355 | 0.479 | 0.562 | 1 |
| Lars2 | 0.003134806 | 0.307983451 | 0.432 | 0.327 | 1 |
| Klhl2 | 0.003160689 | -0.307407826 | 0.217 | 0.3 | 1 |
| Ptpn9 | 0.003196266 | -0.371071237 | 0.281 | 0.361 | 1 |
| Acer3 | 0.003231755 | -0.339166583 | 0.285 | 0.368 | 1 |
| Cyp4f15 | 0.003265721 | -0.254289834 | 0.276 | 0.368 | 1 |
| Wdr70 | 0.003334739 | -0.358676588 | 0.139 | 0.211 | 1 |
| Pde1a | 0.003355952 | -0.258820823 | 0.092 | 0.157 | 1 |
| Paqr8 | 0.003393125 | -0.292048817 | 0.606 | 0.668 | 1 |
| Atp2a2 | 0.003403662 | -0.250408936 | 0.616 | 0.7 | 1 |
| Dst | 0.003563954 | 0.302771344 | 0.658 | 0.596 | 1 |
| Cdk17 | 0.003570902 | -0.32151079 | 0.342 | 0.429 | 1 |
| Ak4 | 0.003601746 | -0.320830919 | 0.101 | 0.167 | 1 |
| Ldb2 | 0.003826229 | 0.373491853 | 0.191 | 0.121 | 1 |
| Slit2 | 0.003872344 | 0.263059112 | 0.21 | 0.133 | 1 |
| Cadps | 0.00400455 | 0.39362496 | 0.231 | 0.153 | 1 |
| Epha7 | 0.004062388 | -0.278539095 | 0.142 | 0.218 | 1 |
| Mal | 0.004102776 | 0.287703342 | 0.226 | 0.15 | 1 |
| Brinp3 | 0.004217898 | -0.262488304 | 0.467 | 0.542 | 1 |
| Zmiz1os1 | 0.004334789 | 0.252971355 | 0.13 | 0.07 | 1 |
| Peli1 | 0.004352833 | -0.298201485 | 0.288 | 0.375 | 1 |
| Pura | 0.00437894 | 0.315845231 | 0.295 | 0.208 | 1 |
| Ubqln1 | 0.004426314 | -0.263403535 | 0.123 | 0.196 | 1 |
| Chpt1 | 0.004479634 | 0.258348977 | 0.472 | 0.38 | 1 |
| Sltm | 0.004520345 | -0.31594785 | 0.389 | 0.477 | 1 |
| St13 | 0.004520597 | -0.351823189 | 0.186 | 0.259 | 1 |
| Atp6v1d | 0.004580001 | -0.303644803 | 0.139 | 0.211 | 1 |
| Rsrp1 | 0.004593599 | 0.259862029 | 0.552 | 0.467 | 1 |
| Fkbp1a | 0.004642244 | -0.298761275 | 0.208 | 0.291 | 1 |
| Tmcc3 | 0.00474034 | 0.260345601 | 0.564 | 0.472 | 1 |
| Nfix | 0.004823265 | 0.272005813 | 0.37 | 0.283 | 1 |
| Pag1 | 0.004884333 | -0.262195449 | 0.328 | 0.414 | 1 |
| Calb1 | 0.00494449 | -0.281987667 | 0.123 | 0.194 | 1 |
| Gm13031 | 0.005064515 | 0.265443876 | 0.142 | 0.082 | 1 |
| C530008M17Rik | 0.005120903 | 0.296552991 | 0.186 | 0.119 | 1 |
| Dtx1 | 0.005355541 | 0.27121029 | 0.17 | 0.104 | 1 |
| Magi3 | 0.005405967 | -0.275180625 | 0.439 | 0.518 | 1 |
| Atp5o | 0.005465735 | -0.323206343 | 0.373 | 0.45 | 1 |
| Erbb4 | 0.005517669 | 0.354924579 | 0.63 | 0.564 | 1 |
| Smox | 0.005520593 | -0.305869545 | 0.165 | 0.232 | 1 |
| mt-Nd2 | 0.005614171 | -0.272819432 | 0.382 | 0.47 | 1 |
| Rin2 | 0.005627477 | -0.299432395 | 0.177 | 0.252 | 1 |
| Glce | 0.006000082 | -0.264413999 | 0.068 | 0.123 | 1 |
| Ppp1r2 | 0.006445323 | -0.310285213 | 0.255 | 0.337 | 1 |
| Cipc | 0.006642579 | -0.271187983 | 0.241 | 0.327 | 1 |
| AI846148 | 0.006712538 | -0.272742376 | 0.094 | 0.155 | 1 |
| Wasf1 | 0.006846764 | -0.304741639 | 0.149 | 0.218 | 1 |
| Fgf13 | 0.006970226 | 0.277513515 | 0.592 | 0.494 | 1 |
| Acss2 | 0.007036805 | 0.312063042 | 0.267 | 0.194 | 1 |
| Btbd3 | 0.007067237 | 0.290306541 | 0.215 | 0.145 | 1 |
| Dcun1d5 | 0.007178558 | -0.316944231 | 0.151 | 0.218 | 1 |
| Sumo2 | 0.007256719 | -0.286962453 | 0.193 | 0.269 | 1 |
| Tesk2 | 0.007465319 | 0.257402265 | 0.196 | 0.128 | 1 |
| Hspa5 | 0.007467532 | -0.301479498 | 0.144 | 0.211 | 1 |
| Scn1a | 0.007658457 | 0.305799643 | 0.149 | 0.092 | 1 |
| Kif5c | 0.007692579 | -0.275376554 | 0.123 | 0.186 | 1 |
| Nalcn | 0.007873886 | 0.365825882 | 0.203 | 0.136 | 1 |
| Gpr19 | 0.008034885 | -0.318788299 | 0.127 | 0.189 | 1 |
| Synpr | 0.008219177 | -0.253570656 | 0.113 | 0.179 | 1 |
| Dip2a | 0.008225922 | 0.254267239 | 0.163 | 0.102 | 1 |
| Tcaf1 | 0.008260767 | -0.250592061 | 0.307 | 0.387 | 1 |
| Naa20 | 0.008298507 | -0.256797154 | 0.097 | 0.157 | 1 |
| Msmo1 | 0.008661421 | 0.277055978 | 0.297 | 0.22 | 1 |
| Ints6l | 0.008677435 | 0.267859631 | 0.252 | 0.177 | 1 |
| Ccdc148 | 0.008697638 | 0.26276151 | 0.182 | 0.119 | 1 |
| Frmpd1 | 0.008702617 | -0.332002215 | 0.25 | 0.322 | 1 |
| Map7 | 0.008778194 | 0.272604383 | 0.193 | 0.128 | 1 |
| Mier3 | 0.008829183 | -0.267818407 | 0.075 | 0.128 | 1 |
| Ptpn5 | 0.00895283 | -0.293687722 | 0.144 | 0.208 | 1 |
| Wdr89 | 0.00962636 | -0.266696333 | 0.163 | 0.23 | 1 |
| Sik2 | 0.009636184 | -0.258943388 | 0.2 | 0.274 | 1 |
| Slc24a2 | 0.009811536 | 0.275611417 | 0.321 | 0.247 | 1 |
| Bcl2 | 0.009818562 | 0.272798495 | 0.67 | 0.6 | 1 |
| Fam155a | 0.009877663 | 0.253920467 | 0.264 | 0.189 | 1 |
| Lef1 | 0.010033224 | 0.266761225 | 0.123 | 0.07 | 1 |
| Scg2 | 0.010103276 | -0.268660415 | 0.2 | 0.276 | 1 |
| Dynll1 | 0.01014674 | -0.273768474 | 0.191 | 0.262 | 1 |
| Os9 | 0.010301674 | 0.256681336 | 0.163 | 0.104 | 1 |
| Dhtkd1 | 0.010663293 | 0.253432472 | 0.226 | 0.157 | 1 |
| Penk | 0.010685407 | -0.291864376 | 0.439 | 0.513 | 1 |
| Gm2163 | 0.010966016 | -0.276623606 | 0.37 | 0.45 | 1 |
| Rnf24 | 0.011232208 | -0.253119674 | 0.219 | 0.291 | 1 |
| Gm44151 | 0.011324849 | -0.339920445 | 0.191 | 0.252 | 1 |
| Zc3h6 | 0.011425274 | 0.300657146 | 0.184 | 0.123 | 1 |
| Xkr4 | 0.011921571 | 0.31912877 | 0.274 | 0.206 | 1 |
| Sema4d | 0.012085433 | 0.25386152 | 0.373 | 0.293 | 1 |
| Robo2 | 0.012432322 | -0.258416756 | 0.406 | 0.475 | 1 |
| Klhdc10 | 0.01272683 | 0.277718593 | 0.342 | 0.271 | 1 |
| Ftx | 0.01279661 | 0.262666286 | 0.245 | 0.177 | 1 |
| Ankrd13c | 0.012909914 | -0.251345082 | 0.165 | 0.232 | 1 |
| Tet3 | 0.012938179 | 0.290038947 | 0.328 | 0.262 | 1 |
| Ddx10 | 0.012993577 | -0.252672149 | 0.094 | 0.15 | 1 |
| Morf4l2 | 0.013102915 | -0.287548447 | 0.106 | 0.162 | 1 |
| Tceal9 | 0.013169351 | -0.258796745 | 0.057 | 0.102 | 1 |
| Tsga10 | 0.013896022 | 0.251395171 | 0.245 | 0.177 | 1 |
| Scara3 | 0.013909974 | 0.262185848 | 0.208 | 0.145 | 1 |
| Ddo | 0.014556171 | 0.366855565 | 0.382 | 0.315 | 1 |
| mt-Nd3 | 0.014645978 | -0.297451809 | 0.083 | 0.133 | 1 |
| Hmgn3 | 0.015116186 | -0.263869806 | 0.17 | 0.232 | 1 |
| Dnah7b | 0.015155813 | 0.285319737 | 0.259 | 0.194 | 1 |
| Gm28175 | 0.015207754 | 0.3387067 | 0.304 | 0.237 | 1 |
| Pcdh11x | 0.015874297 | -0.259626308 | 0.521 | 0.598 | 1 |
| Kcnh7 | 0.016231666 | 0.252897032 | 0.182 | 0.123 | 1 |
| Plscr4 | 0.016874779 | 0.259012252 | 0.108 | 0.063 | 1 |
| Sqstm1 | 0.017116127 | 0.253383308 | 0.2 | 0.14 | 1 |
| Sorbs2 | 0.017305652 | 0.271625188 | 0.325 | 0.254 | 1 |
| Gm9843 | 0.017395007 | -0.307792155 | 0.184 | 0.242 | 1 |
| Usp6nl | 0.017439258 | 0.309837283 | 0.307 | 0.242 | 1 |
| Tmem68 | 0.017493243 | -0.255852391 | 0.099 | 0.15 | 1 |
| Prkar1a | 0.017867765 | -0.277561356 | 0.184 | 0.249 | 1 |
| Jakmip2 | 0.017978769 | 0.260777132 | 0.222 | 0.162 | 1 |
| Kcnip3 | 0.018142582 | 0.300743979 | 0.344 | 0.276 | 1 |
| mt-Nd1 | 0.018522786 | -0.326900137 | 0.307 | 0.373 | 1 |
| Ednrb | 0.018695784 | 0.27787701 | 0.29 | 0.218 | 1 |
| Ptp4a2 | 0.020082548 | -0.278524472 | 0.156 | 0.215 | 1 |
| Atp5g1 | 0.021015461 | -0.257429519 | 0.073 | 0.119 | 1 |
| Zfp438 | 0.021105079 | 0.28196723 | 0.323 | 0.262 | 1 |
| Ino80d | 0.021373576 | -0.333526665 | 0.219 | 0.274 | 1 |
| Gm45708 | 0.021521357 | -0.277245238 | 0.144 | 0.203 | 1 |
| Slc43a2 | 0.021754623 | 0.258977298 | 0.172 | 0.119 | 1 |
| Hsph1 | 0.022644933 | -0.272460225 | 0.101 | 0.153 | 1 |
| D030047H15Rik | 0.023333493 | -0.354545132 | 0.316 | 0.375 | 1 |
| AY036118 | 0.023759272 | -0.275354229 | 0.356 | 0.421 | 1 |
| Pak1 | 0.023962238 | -0.276655243 | 0.323 | 0.385 | 1 |
| Mfhas1 | 0.024021692 | -0.277371507 | 0.233 | 0.295 | 1 |
| Tspan3 | 0.025097391 | 0.262671914 | 0.297 | 0.232 | 1 |
| Nav1 | 0.025725983 | -0.292218139 | 0.165 | 0.22 | 1 |
| Cdon | 0.027103376 | -0.258366473 | 0.061 | 0.102 | 1 |
| Cntn4 | 0.028950956 | 0.276571475 | 0.309 | 0.249 | 1 |
| Drg1 | 0.029380505 | -0.287455249 | 0.226 | 0.283 | 1 |
| Agfg2 | 0.029967336 | -0.264277535 | 0.116 | 0.165 | 1 |
| Pde7b | 0.030022191 | -0.250434386 | 0.606 | 0.625 | 1 |
| St7 | 0.032571974 | -0.28179167 | 0.215 | 0.271 | 1 |
| Gm26848 | 0.037409786 | -0.284829561 | 0.323 | 0.375 | 1 |
| Gm45881 | 0.038100385 | -0.274091526 | 0.257 | 0.317 | 1 |
| Dgkh | 0.038183588 | -0.255810573 | 0.191 | 0.245 | 1 |
| Lix1 | 0.038551033 | -0.251458913 | 0.389 | 0.446 | 1 |
| Pde10a | 0.039977059 | -0.278472676 | 0.547 | 0.586 | 1 |
| Arpc1a | 0.040121102 | -0.280570407 | 0.177 | 0.232 | 1 |
| Zbtb16 | 0.041131547 | -0.271234964 | 0.172 | 0.223 | 1 |
| Fjx1 | 0.041732442 | 0.254035763 | 0.295 | 0.237 | 1 |
| Sdk2 | 0.042154718 | -0.266331446 | 0.12 | 0.165 | 1 |
| Mapre2 | 0.044512984 | 0.259805254 | 0.448 | 0.385 | 1 |
| Bex2 | 0.044677273 | -0.253092348 | 0.229 | 0.288 | 1 |
| Golim4 | 0.045655327 | 0.277147933 | 0.179 | 0.133 | 1 |
| Pcyt1b | 0.05264059 | 0.267378417 | 0.189 | 0.143 | 1 |
| Scai | 0.054814583 | -0.269159018 | 0.267 | 0.312 | 1 |
| Epha5 | 0.061599365 | -0.258581271 | 0.278 | 0.327 | 1 |
| Nnat | 0.061951712 | 0.521314099 | 0.396 | 0.375 | 1 |
| Emp2 | 0.070538579 | 0.25664932 | 0.16 | 0.121 | 1 |
| Tox2 | 0.077417372 | -0.258616957 | 0.302 | 0.354 | 1 |
| 4732471J01Rik | 0.085090129 | 0.26558835 | 0.302 | 0.264 | 1 |
| Lrmda | 0.141549239 | -0.32958861 | 0.205 | 0.237 | 1 |
| Pigk | 0.147274613 | -0.284037265 | 0.264 | 0.293 | 1 |
| Gm26827 | 0.185287495 | -0.288891205 | 0.191 | 0.22 | 1 |
| Unc13c | 0.21968755 | -0.311264974 | 0.186 | 0.218 | 1 |
| mt-Co2 | 0.566200667 | -0.260376444 | 0.587 | 0.564 | 1 |
