# Supplementary material for: Single-nucleus transcriptomic mapping uncovers targets for traumatic brain injury
Source: HighWire-hosted journal article supplement (doi:10.1101/gr.277881.123), 2023-09-20
Supplement: Supplemental_Table_S7.docx [file Supplemental_Table_S7.docx]

| **Supplemental Table S7. Primer sequences for qPCR.** | | |
| --- | --- | --- |
| *Tcf7l1* | Forward | 5'- CTGATCCCCTTCCAGGACGA -3' |
| Reverse | 5'- CTGGGGCCTTCTCACTTCG -3' |
| *Egfr* | Forward | 5'- GGCAGAACAAAGCAACATGGTC -3' |
| Reverse | 5'- GGGAGTCAGAGATGGCTTCTGG -3' |
| *Nes* | Forward | 5'- CAGCGTTGGAACAGAGGTTGG -3' |
| Reverse | 5'- TGGCACAGGTGTCTCAAGGGTAG -3' |
| *Cdk1* | Forward | 5'- CTCGGCCTCTAAGCTCCTGG -3' |
| Reverse | 5'- ACCACAGCGTCACTACCTCG -3' |
| *Dcx* | Forward | 5'- CTGACTCAGGTAACGACCAAGAC -3' |
| Reverse | 5'- TTCCAGGGCTTGTGGGTGTAGA -3' |
| *Meg3* | Forward | 5'- GCTGTTGTGAGGATTGGT -3' |
| Reverse | 5'- AGGTAGGTGTGGATGTGT -3' |
| *Blbp* | Forward | 5'- ATGAAAGCTCTGGGCGTGGG -3' |
| Reverse | 5'- GCGAACAGCAACGATATCCCC -3' |
| *Adamts18* | Forward | 5'- GGACAGATTTATGATGCCGACA -3' |
| Reverse | 5'- GGTGGCACCAGAGTGACTT -3' |
| *Cd9* | Forward | 5'- TTTCCAGGTTAAGCCCTGCCC -3' |
| Reverse | 5'- GTCTTCAGGGCCGTTGTTCC -3' |
| *Hes5* | Forward | 5' - GTCGGGACCGCATCAACA -3' |
| Reverse | 5' - GCGAAGGCTTTGCTGTGTTT -3' |
| *Gapdh* | Forward | 5' - CCCAGAACATCATCCCTGCAT -3' |
| Reverse | 5' - CATCATACTTGGCAGGTTTCTCC -3' |
